# Supplementary material for: Functional visualization of NK cell-mediated killing of metastatic single tumor cells
Source: eLife journal article supplement (doi:10.7554/elife.76269), 2022-02-03
Supplement: supp [file elife-76269-supp-v1.zip]

Fitting\_1b; Figure 1B

Main\_191017.m; Figure 3

Functions associated with Main\_191017.m

VisualizeTrajectory(ncell, indx)

SetPositionToOrigin(cell)

ReplaceZeroToNan(cell, maxt\_list)

ReplaceMissingTimeToNan(cell, maxt\_list)

ImportAndConvertTable(id, flag)

GraphMSD(msd0, msd1)

GraphInstSpeed(inst\_speed0, inst\_speed1)

ConvertToTable(data)

CellMigrationQuantification(cell)

CalculationHitProbability(cnt\_in\_all, maxt\_list\_c\_all)

HitCancer(nk, cancer, inner, outer)

RearrangeTime(cell)

Lung\_NK.m; Supplementary Table
