# Supplementary material for: Functional visualization of NK cell-mediated killing of metastatic single tumor cells
Source: eLife journal article supplement (doi:10.7554/elife.76269), 2022-02-03

Figure 5-figure supplement 2: *In vivo* Dynamics of ERK Activity in NK Cells After Target Cell *Contact*.

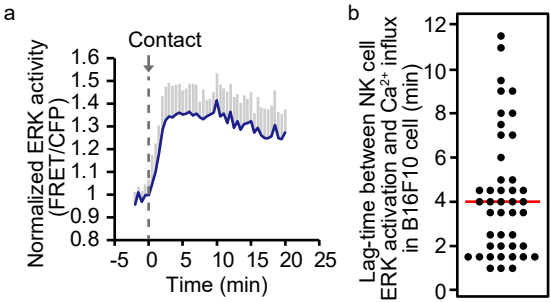

Supplement: supp [file elife-76269-supp-v1.zip]
