# Supplementary material for: Functional visualization of NK cell-mediated killing of metastatic single tumor cells
Source: eLife journal article supplement (doi:10.7554/elife.76269), 2022-02-03
Supplement: supp [file elife-76269-supp-v1.zip]

Figure 6-figure supplement 2: Lack of Micro-Thrombus Around the Disseminated Tumor Cells.

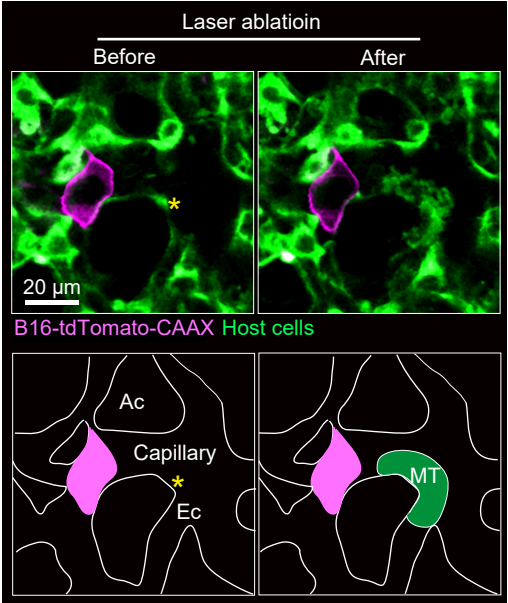

Figure 6-figure supplement 2 Ichise et. al.
