# Supplementary material for: Functional visualization of NK cell-mediated killing of metastatic single tumor cells
Source: eLife journal article supplement (doi:10.7554/elife.76269), 2022-02-03
Supplement: supp [file elife-76269-supp-v1.zip]

Archive with 19 entries (19 files):
- elife_poa_e76269_Figure_1_figure_supplement_1.pdf
- elife_poa_e76269_Figure_1_figure_supplement_2.pdf
- elife_poa_e76269_Figure_1_figure_supplement_3.pdf
- elife_poa_e76269_Figure_2_figure_supplement_1.pdf
- elife_poa_e76269_Figure_4_figure_supplement_1.pdf
- elife_poa_e76269_Figure_5_figure_supplement_1.pdf
- elife_poa_e76269_Figure_5_figure_supplement_2.pdf
- elife_poa_e76269_Figure_4_figure_supplement_2.pdf
- elife_poa_e76269_Figure_6_figure_supplement_1.pdf
- elife_poa_e76269_Figure_6_figure_supplement_2.pdf
- elife_poa_e76269_Figure_6_figure_supplement_3.pdf
- elife_poa_e76269_Source_code_1.zip
- elife_poa_e76269_Transparent_Reporting_File.docx
- elife_poa_e76269_Figure_1_video_1.mp4
- elife_poa_e76269_Figure_2_video_1.mp4
- elife_poa_e76269_Figure_4_video_1.mp4
- elife_poa_e76269_Figure_4_video_2.mp4
- elife_poa_e76269_Figure_4_video_3.mp4
- elife_poa_e76269_Figure_6_video_1.mp4
