# Supplementary material for: Functional visualization of NK cell-mediated killing of metastatic single tumor cells
Source: eLife journal article supplement (doi:10.7554/elife.76269), 2022-02-03
Supplement: supp [file Fig1b.xlsx]

## Sheet: Sheet1
Time	Control	AGM1
1	1	1
12	0.0476154	0.71655
24	0.0301626	0.880496
48	0.0311777	0.973352
96	0.0621885	2.88903
156	0.374399	17.4912
200	1.36265	90.2893
