# Supplementary material for: Functional visualization of NK cell-mediated killing of metastatic single tumor cells
Source: eLife journal article supplement (doi:10.7554/elife.76269), 2022-02-03
Supplement: supp [file nk_neg_1.xlsx]

## Sheet: Sheet1
1	180.056	204.551	2.5	1	0
2	181.963	198.195	2.5	1	19
3	182.667	171.11	5.89826	1	39
4	182.824	170.166	4.05695	1	60
5	182.451	174.65	4.18116	1	82
6	182.085	175.513	2.5	1	102
8	190.144	182.694	18.5146	1	146
1	37.7382	40.7122	7.14004	2	1
2	39.9107	39.4306	7.32718	2	20
3	37.3706	40.6911	7.20002	2	40
4	35.8318	40.6804	7.59548	2	61
5	33.6704	41.3021	7.79317	2	83
6	13.5865	31.8442	8.68214	2	103
7	11.8762	26.3545	9.00033	2	119
8	5.1414	22.5295	10.9811	2	134
1	237.13	27.6877	9.43336	3	2
2	237.08	27.6919	9.91037	3	21
3	237.193	27.5704	10.0252	3	41
4	236.962	27.9399	9.97894	3	62
5	236.686	28.2087	10.0894	3	84
6	236.737	27.7438	9.94689	3	105
7	236.404	27.9331	9.99968	3	120
8	236.295	27.9697	10.2005	3	135
9	236.266	27.6757	10.2762	3	152
10	236.805	27.0149	10.0613	3	169
11	236.676	26.9476	10.197	3	191
12	236.486	27.1934	10.1699	3	212
13	236.522	27.2493	10.1266	3	236
14	236.25	27.4622	10.1775	3	257
15	236.263	27.4427	10.3029	3	276
16	236.238	27.6186	10.553	3	295
17	236.618	27.4365	10.5833	3	315
18	236.556	27.625	10.4765	3	337
19	236.624	28.1417	10.6366	3	361
20	236.394	28.5166	10.6028	3	389
21	236.296	28.6267	10.8315	3	417
22	236.809	28.5959	10.3026	3	445
23	236.752	28.7491	10.941	3	471
24	237.054	28.81	10.9822	3	494
25	237.022	29.3102	11.11	3	519
26	237.007	29.1425	11.0225	3	543
27	237.287	29.2666	11.3832	3	578
28	236.868	29.713	11.1377	3	591
29	237.352	29.292	11.3671	3	628
30	237.492	29.0464	11.4473	3	653
31	237.483	29.3364	11.553	3	677
32	237.482	29.6937	11.2572	3	702
33	237.884	29.644	11.3939	3	733
34	237.316	30.1048	11.4263	3	758
35	237.217	30.2432	11.3869	3	781
36	237.04	30.6668	11.5475	3	803
37	237.091	30.5101	11.5549	3	828
38	237.156	30.3819	11.5964	3	854
39	237.343	29.9717	11.3906	3	883
40	237.269	30.121	11.5423	3	911
41	236.928	30.3964	11.6641	3	940
42	236.757	30.0928	11.243	3	955
43	236.714	29.867	11.3003	3	996
44	236.72	29.9241	11.5073	3	1020
45	236.692	29.7841	11.6458	3	1043
46	236.599	29.3359	11.5566	3	1065
47	236.953	29.0332	11.8302	3	1093
48	236.584	29.1277	11.6805	3	1117
49	236.002	29.6211	11.8369	3	1146
50	236.384	28.9576	11.8123	3	1169
51	236.581	28.3323	11.9236	3	1190
52	236.402	28.5051	11.8742	3	1215
53	236.232	28.5165	11.9383	3	1239
54	236.43	28.0612	11.8701	3	1262
55	236.18	27.8199	11.7795	3	1286
56	236.132	27.905	11.6983	3	1307
57	236.3	27.5718	11.7519	3	1331
58	235.944	28.668	12.0916	3	1352
59	236.217	28.7894	12.2228	3	1379
60	236.3	28.6854	11.812	3	1405
61	236.589	28.1108	12.3505	3	1434
62	236.688	28.1825	12.2707	3	1460
63	236.492	28.5439	12.2231	3	1489
64	236.429	28.9524	12.6962	3	1517
65	236.593	29.0453	12.7374	3	1545
66	236.708	29.2028	12.8997	3	1567
67	236.873	28.8358	12.7211	3	1593
68	237.134	28.8876	12.748	3	1621
69	236.878	28.9395	12.577	3	1643
70	236.936	28.8856	12.6446	3	1668
71	237.137	28.8225	12.7864	3	1694
72	236.925	29.2213	12.7134	3	1719
73	237.502	28.9479	12.891	3	1751
74	236.911	29.615	13.13	3	1778
75	236.993	29.686	13.226	3	1808
76	237.248	29.58	13.417	3	1836
77	237.301	29.4562	12.7568	3	1866
78	237.875	28.9438	12.6917	3	1894
79	238.08	28.6572	12.8447	3	1922
80	237.798	29.2695	12.8984	3	1951
81	236.798	29.7415	13.2124	3	1977
82	236.857	29.3616	13.3518	3	2004
83	237.014	29.1058	13.1729	3	2033
84	237.291	28.4893	13.0197	3	2065
85	237.525	28.3992	12.9545	3	2095
86	237.32	28.6107	13.0455	3	2126
87	237.555	28.047	12.9883	3	2148
88	237.086	27.9874	13.3805	3	2175
89	236.669	28.2947	13.3677	3	2200
90	236.709	27.6767	13.1377	3	2223
91	236.924	27.665	13.0496	3	2248
92	236.967	27.7294	13.0312	3	2273
93	236.655	27.8768	13.2997	3	2304
94	236.523	27.3664	13.1051	3	2329
95	236.447	27.7762	13.8287	3	2360
96	236.214	27.7327	13.5067	3	2392
97	236.313	27.5614	13.1135	3	2420
98	236.489	27.3853	13.3478	3	2448
99	236.931	27.4782	13.2869	3	2474
100	236.862	27.882	13.4295	3	2501
101	236.203	28.8347	14.175	3	2533
102	236.307	28.7795	13.6625	3	2561
103	236.509	28.8325	13.866	3	2594
104	236.189	29.3281	13.9361	3	2622
105	236.342	29.4194	13.826	3	2658
106	236.863	28.9445	13.7313	3	2689
107	237.202	28.6337	13.7709	3	2718
108	237.129	29.1494	14.164	3	2744
109	236.035	30.2112	14.153	3	2769
110	237.178	29.1117	13.4749	3	2795
111	236.569	29.8444	13.9417	3	2821
112	236.747	29.8929	13.9229	3	2848
113	237.293	29.0893	13.6195	3	2872
114	237.323	28.763	13.6509	3	2896
115	237.308	29.1616	14.2144	3	2929
116	237.333	29.2609	14.4109	3	2952
117	237.339	29.3554	14.0362	3	2977
118	237.236	29.4799	14.1256	3	3001
119	237.957	29.1487	13.8513	3	3022
120	237.92	29.13	13.7097	3	3045
121	237.864	29.1473	14.0363	3	3071
122	237.388	29.4633	14.4402	3	3099
123	237.432	29.4178	14.44	3	3123
124	237.335	29.2176	14.2363	3	3144
125	237.706	28.9247	13.7921	3	3166
126	237.705	29.3092	14.1761	3	3187
127	237.375	29.6198	14.3059	3	3205
128	237.443	29.2593	14.3571	3	3223
129	236.79	29.3718	14.5356	3	3242
130	236.944	28.5535	14.4281	3	3264
131	237.123	28.1596	14.1577	3	3284
132	236.85	28.3692	14.2259	3	3306
133	237.23	28.2272	14.1332	3	3330
134	237.204	27.6732	14.1742	3	3354
135	236.245	28.6965	14.4777	3	3380
136	236.229	28.7791	14.7139	3	3404
137	236.432	28.2027	14.3794	3	3431
138	236.38	28.2269	14.2618	3	3458
139	236.896	27.8887	14.2985	3	3484
140	236.979	27.8573	14.2904	3	3510
141	236.751	28.3943	14.6753	3	3537
142	236.652	28.7715	14.8422	3	3562
143	236.461	28.7557	14.7199	3	3590
144	236.678	28.3706	14.8486	3	3614
145	236.72	28.6357	14.6698	3	3637
146	237.301	28.1706	14.7295	3	3658
147	237.158	28.4472	14.9909	3	3683
148	237.054	29.0443	14.942	3	3703
149	237.004	29.2763	15.1619	3	3723
150	236.66	29.4064	15.256	3	3741
151	236.766	29.453	14.9862	3	3762
152	237.684	28.7852	14.743	3	3781
153	238.107	28.3408	14.8323	3	3800
154	238.12	28.6448	15.1166	3	3818
155	237.424	29.786	15.4561	3	3837
156	237.371	30.0179	15.4427	3	3853
157	237.297	29.8889	15.4001	3	3875
158	237.713	29.4522	14.9039	3	3896
159	238.262	29.022	15.0657	3	3919
160	238.659	28.9331	15.0116	3	3942
161	238.185	29.1625	15.0773	3	3963
162	238.029	29.097	15.255	3	3982
163	237.795	29.2972	15.1963	3	3997
164	237.618	29.4169	15.4258	3	4014
165	238.04	28.731	15.2179	3	4029
166	238.699	27.9928	15.0203	3	4047
167	237.911	28.5592	15.3161	3	4065
168	237.631	28.6257	15.1748	3	4085
169	236.744	29.8555	15.5939	3	4104
170	236.622	29.7044	15.6852	3	4119
171	236.414	29.8767	15.8093	3	4134
172	236.533	29.4012	15.6933	3	4153
173	236.687	29.24	15.6971	3	4170
174	236.203	29.3542	15.6902	3	4192
175	236.515	29.1061	15.6758	3	4219
176	236.637	28.9262	15.5241	3	4242
177	236.688	28.8107	15.7052	3	4266
178	236.595	28.9931	15.7405	3	4291
179	236.535	29.404	15.8409	3	4316
180	237.073	28.4483	15.6899	3	4341
181	236.637	29.1024	15.9571	3	4367
182	236.946	28.8655	15.6175	3	4393
183	236.457	29.4468	16.1247	3	4417
184	236.905	29.1619	15.9253	3	4439
185	236.657	29.7061	16.0667	3	4458
186	237.645	28.4962	15.569	3	4475
187	238.014	28.0743	15.5124	3	4493
188	237.556	28.4729	15.4361	3	4513
189	237.476	28.8843	15.8767	3	4536
190	237.316	28.939	16.1412	3	4557
191	237.686	29.2806	16.3654	3	4578
192	237.355	29.9352	16.2064	3	4604
193	238.102	29.3764	16.1607	3	4628
194	237.944	29.5668	16.1961	3	4652
195	237.668	29.5839	16.2124	3	4678
196	237.477	29.8598	16.2894	3	4704
197	237.374	29.9101	16.4959	3	4727
198	237.58	29.2517	16.5014	3	4754
199	238.21	28.4346	15.9308	3	4779
200	238.494	28.1588	15.7989	3	4804
201	238.517	28.1311	15.9793	3	4829
202	237.906	28.7271	16.3393	3	4856
203	237.198	29.3866	16.5186	3	4881
204	236.054	30.6084	16.4811	3	4905
205	236.869	29.5207	16.398	3	4928
206	236.849	29.0455	16.0892	3	4953
207	237.216	28.6825	16.0066	3	4980
208	236.733	29.286	16.4901	3	5015
209	237.204	28.2691	16.2378	3	5044
210	236.712	28.3312	16.4455	3	5074
211	236.394	28.4873	16.2593	3	5104
212	236.203	28.4463	16.0807	3	5137
213	236.95	27.7039	16.0686	3	5166
214	237.184	27.741	16.4729	3	5195
215	237.2	27.9563	16.7056	3	5223
216	236.64	28.5091	16.7721	3	5248
217	236.491	28.8195	16.9696	3	5273
218	236.315	29.174	16.8179	3	5296
219	236.587	28.9743	16.7927	3	5321
220	237.335	28.2903	16.517	3	5343
221	237.281	28.5697	16.6047	3	5367
222	237.382	28.6954	16.6311	3	5391
223	237.12	29.1137	17.0011	3	5417
224	236.862	29.5669	17.048	3	5441
225	237.017	29.6113	17.1056	3	5469
226	237.471	28.9316	16.6352	3	5495
227	237.48	28.8168	16.6555	3	5523
228	237.532	29.0809	16.7258	3	5553
229	237.554	28.957	16.6925	3	5576
230	237.292	29.6443	17.156	3	5602
231	237.607	29.3594	16.9464	3	5628
232	237.925	29.3159	17.1479	3	5656
233	237.657	29.5895	16.8571	3	5682
234	237.759	29.1503	16.7645	3	5706
235	237.763	28.9773	16.7114	3	5729
236	237.549	29.2228	17.0642	3	5754
237	237.36	29.4577	17.1427	3	5779
238	237.926	28.7656	16.8737	3	5801
239	237.423	28.8962	16.8975	3	5822
240	237.481	28.9184	16.8791	3	5844
241	237.538	28.7437	16.7738	3	5865
1	266.231	86.9706	2.5	4	3
2	263.011	91.6134	2.5	4	22
3	264.456	89.5949	2.5	4	42
4	260.997	93.0556	2.5	4	63
1	475.387	186.327	2.5	5	4
2	481.386	193.828	3.909	5	26
3	491.613	192.212	7.45381	5	45
4	464.399	208.728	15.9255	5	76
5	465.035	207.846	15.7351	5	98
6	466.554	205.66	16.5778	5	116
7	468.439	203.857	16.8897	5	131
8	469.431	202.255	17.4999	5	148
9	464.073	208.737	16.1471	5	165
10	463.968	208.569	16.3331	5	183
11	463.416	208.271	16.1491	5	203
12	464.014	208.212	16.4859	5	226
13	464.249	207.967	16.2733	5	249
14	464.623	207.979	15.921	5	268
15	464.426	208.213	16.1743	5	291
16	464.305	208.456	16.6075	5	310
17	464.272	208.57	16.681	5	328
18	464.505	208.678	17.0429	5	352
19	464.327	208.873	16.9305	5	375
20	464.822	208.409	17.1392	5	405
21	465.016	208.339	16.7315	5	433
22	465.26	208.546	17.1288	5	463
23	465.192	208.888	17.0031	5	486
1	376.138	188.082	2.5	6	5
2	376.021	187.752	2.5	6	23
3	376.222	187.765	2.5	6	43
4	375.762	188.198	2.5	6	64
5	375.241	188.075	2.5	6	85
6	374.942	188.261	2.5	6	106
7	375.057	188.038	4.17316	6	122
8	375.019	187.699	4.20046	6	137
9	375.464	187.299	4.05127	6	155
10	375.378	187.795	4.41048	6	171
11	375.57	186.459	4.44595	6	193
12	375.412	186.122	4.97776	6	215
13	374.992	186.05	4.80315	6	239
14	374.758	186.306	4.78335	6	260
15	375.038	186.215	4.8563	6	279
16	375.343	186.692	4.89369	6	298
17	375.66	186.971	5.15983	6	318
18	374.767	189.451	5.18842	6	339
19	360.556	194.165	2.5	6	362
20	362.198	194.201	3.97095	6	392
21	360.731	194.436	4.24403	6	420
22	364.263	194.138	4.55066	6	448
23	363.483	194.228	4.5584	6	474
24	366.366	193.91	4.94845	6	497
25	366.777	194.016	4.98298	6	521
26	363.391	194.58	4.90451	6	544
27	362.655	194.788	4.91991	6	568
28	361.871	194.446	5.08635	6	592
29	363.699	194.79	5.19002	6	615
30	364.767	194.687	5.28621	6	641
31	362.713	194.405	4.8672	6	665
32	364.122	194.768	5.1863	6	688
33	363.086	194.92	5.10321	6	722
34	362.342	195.269	5.08311	6	746
35	362.467	195.201	5.24595	6	769
36	363.212	195.321	5.21875	6	793
37	364.017	194.987	5.12506	6	814
38	363.88	194.622	4.96642	6	839
39	363.769	194.74	5.21228	6	867
40	363.167	194.672	5.30414	6	898
41	362.689	194.727	5.29612	6	928
42	362.527	194.465	5.12057	6	957
43	361.721	194.115	4.91076	6	985
44	361.767	194.208	5.15701	6	1008
45	364.385	193.885	5.48578	6	1032
46	364.822	193.743	5.51582	6	1057
47	365.283	193.75	5.60844	6	1080
48	371.463	201.184	5.41032	6	1108
49	371.697	201.903	5.63824	6	1136
50	371.745	201.631	5.6627	6	1158
51	371.953	200.607	5.72679	6	1181
52	370.979	194.847	6.27879	6	1206
53	360.228	194.003	5.60796	6	1228
54	360.67	193.87	5.70748	6	1250
55	360.778	193.784	5.89482	6	1275
56	360.571	193.775	6.04422	6	1298
57	359.798	193.488	5.92727	6	1318
58	361.087	193.057	6.00368	6	1341
59	360.811	192.579	6.07292	6	1366
60	360.312	190.991	6.56868	6	1392
61	359.236	188.003	7.11547	6	1420
62	359.076	188.211	7.03245	6	1448
63	362.587	194.105	6.8935	6	1473
64	361.602	194.162	6.89656	6	1500
65	361.953	194.271	6.78035	6	1530
66	361.439	193.761	7.00852	6	1554
67	361.85	194.022	6.82827	6	1581
68	361.724	194.448	6.952	6	1607
69	362.512	194.79	7.0804	6	1632
70	363.131	194.923	7.043	6	1656
71	362.051	195.088	7.01418	6	1684
72	362.377	194.199	7.08754	6	1708
73	362.057	194.452	7.10135	6	1735
74	361.011	193.368	7.16788	6	1767
75	359.883	187.825	8.02841	6	1798
76	360.362	187.032	8.06571	6	1826
77	359.911	187.136	8.16497	6	1853
78	359.125	187.331	8.19785	6	1880
79	359.448	186.169	8.11152	6	1910
80	359.856	185.329	8.22685	6	1937
81	360.287	185.747	8.04348	6	1962
82	360.918	185.627	8.19731	6	1993
83	360.502	185.934	8.23131	6	2021
84	358.972	187.052	8.30015	6	2047
85	357.76	187.893	8.39469	6	2082
86	357.722	187.482	8.51293	6	2111
87	358.219	187.143	8.2698	6	2137
88	359.824	185.895	8.2533	6	2163
89	359.861	185.394	8.17604	6	2189
90	360.026	184.852	8.31919	6	2212
91	358.793	185.731	8.27839	6	2237
92	357.79	186.11	8.33383	6	2264
93	358.618	185.338	8.32223	6	2292
94	358.561	185.128	8.53988	6	2318
95	359.786	184.28	8.35671	6	2348
96	360.153	184.126	8.48249	6	2378
97	359.653	183.952	8.61708	6	2406
98	358.767	185.054	8.78747	6	2436
99	358.509	184.62	8.90394	6	2465
100	358.584	185.157	9.02359	6	2495
101	359.104	185.009	8.89181	6	2523
102	359.38	184.48	9.0435	6	2555
103	360.035	184.837	9.12737	6	2583
104	359.265	185.744	9.31997	6	2613
105	358.582	186.003	9.26539	6	2650
106	358.27	186.099	9.47924	6	2679
107	358.81	185.516	9.44833	6	2709
108	360.451	183.776	9.20251	6	2733
109	361.634	182.917	9.31967	6	2758
110	360.044	184.5	9.32487	6	2786
111	360.189	185.302	9.29334	6	2813
112	359.502	185.965	9.49914	6	2839
113	358.99	186.781	9.35864	6	2862
114	358.833	187.081	9.55182	6	2887
115	358.884	187.794	9.58695	6	2918
116	360.099	186.881	9.65814	6	2945
117	360.755	186.175	9.52015	6	2970
118	360.203	186.618	9.57643	6	2993
119	360.045	185.588	9.50549	6	3014
120	360.102	185.492	9.70278	6	3037
121	361.103	183.937	9.53948	6	3060
122	361.622	183.405	9.5443	6	3087
123	362.123	183.246	9.40722	6	3115
124	362.01	183.495	9.52304	6	3138
125	361.516	183.016	9.34637	6	3160
126	360.364	184.567	9.62994	6	3181
127	360.138	185.227	9.60045	6	3200
128	360.159	185.572	9.58594	6	3217
129	359.083	188.419	12.4973	6	3244
130	359.792	187.453	10.8194	6	3257
131	358.702	187.735	10.9644	6	3278
132	357.555	188.351	10.3393	6	3298
133	357.089	188.355	9.96946	6	3321
134	356.727	188.743	10.9044	6	3346
135	357.388	187.831	11.1462	6	3370
136	358.618	187.05	11.0829	6	3394
137	358.818	187.049	11.001	6	3421
138	357.874	187.42	10.9668	6	3446
139	357.64	187.965	11.6669	6	3485
140	357.426	187.84	11.5138	6	3511
141	357.326	187.773	11.6202	6	3538
142	358.821	186.535	10.3932	6	3551
143	360.038	185.766	10.2584	6	3579
144	359.611	185.956	10.4324	6	3603
145	358.248	187.645	10.3722	6	3627
146	357.472	188	10.3898	6	3648
147	357.436	187.838	10.4815	6	3673
148	357.719	188.804	10.5188	6	3696
149	359.342	188.403	10.1537	6	3717
150	360.22	187.121	10.4943	6	3735
151	359.554	187.145	10.6372	6	3755
152	358.693	188.008	10.4938	6	3774
153	358.792	187.506	10.6482	6	3792
154	359	187.702	10.6042	6	3811
155	359.372	187.918	10.6024	6	3829
156	361.251	186.257	10.4507	6	3846
157	394.292	155.72	10.4712	6	3866
158	395.15	156.561	10.5498	6	3886
1	283.757	249.648	2.5	7	6
2	284.841	249.187	2.5	7	24
3	284.349	249.218	2.5	7	44
4	283.856	249.373	2.5	7	65
5	283.548	249.317	2.5	7	86
6	283.081	249.329	2.5	7	107
7	283.569	249.4	2.5	7	121
8	283.844	248.933	2.5	7	136
9	283.971	248.85	2.5	7	153
10	283.487	249.068	2.5	7	170
11	282.861	249.038	2.5	7	192
12	283.064	248.927	2.5	7	214
13	283.112	249.146	2.5	7	238
14	283	249.282	2.5	7	259
15	283.558	248.566	2.5	7	278
16	283.49	248.455	2.5	7	297
17	284.365	248.422	2.5	7	317
18	284.067	246.955	4.00678	7	340
20	291.85	243.71	2.5	7	391
21	292.837	244.058	2.5	7	419
22	297.119	239.07	2.5	7	447
1	171.103	322.821	8.42462	8	7
2	171.981	323.147	8.18785	8	27
3	163.796	324.07	11.1921	8	49
4	159.097	327.678	12.6079	8	78
5	152.617	335.038	13.8857	8	100
6	150.07	339.896	12.7046	8	117
7	150.613	346.657	13.2043	8	132
8	151.057	336.445	15.698	8	150
9	152.842	333.182	15.0859	8	168
10	151.069	337.647	15.4306	8	186
11	150.284	342.63	14.553	8	205
12	150.414	347.613	14.4569	8	229
13	151.462	353.115	15.8356	8	251
14	152.649	349.001	20.5362	8	271
15	150.725	338.9	22.5	8	293
16	157.003	328.054	22.5	8	312
17	156.666	328.781	22.5	8	333
1	204.274	331.997	7.71343	9	8
2	203.193	332.14	7.65143	9	28
3	203.577	332.933	7.67059	9	47
4	204.594	331.944	8.24866	9	68
5	204.207	331.25	8.06972	9	89
6	203.81	331.208	8.12504	9	110
7	204.046	333.384	8.1316	9	124
8	202.674	334.751	7.48874	9	139
9	202.915	334.395	7.66412	9	157
10	202.854	334.927	7.65691	9	174
11	203.3	334.143	7.68555	9	196
12	203.236	334.049	7.80252	9	217
13	203.884	330.055	8.78339	9	242
14	202.767	332.415	8.00109	9	261
15	202.709	332.836	8.09017	9	281
16	203.06	332.2	8.55645	9	299
17	203.135	333.896	8.04874	9	320
18	203.539	333.329	8.34806	9	344
19	204.604	331.756	9.13199	9	370
20	203.503	333.664	8.54986	9	395
21	204.042	332.349	8.96878	9	425
22	203.579	334.137	8.69104	9	453
23	203.625	332.431	9.19206	9	479
24	204.247	331.516	9.36402	9	502
25	204.396	332.161	9.03461	9	529
26	204.715	331.994	9.05867	9	549
27	204.937	331.918	9.41028	9	573
28	204.334	335.202	9.16816	9	600
29	203.231	336.194	8.4805	9	622
30	203.452	336.601	8.53888	9	647
31	203.98	337.099	8.63152	9	670
32	204.269	336.475	8.60357	9	693
33	205.424	332.098	9.74385	9	727
34	205.147	332.601	9.46507	9	752
35	205.041	333.365	9.50338	9	775
36	206.005	333.193	10.1541	9	797
37	205.057	333.258	9.63193	9	821
38	206.074	333.115	10.0087	9	846
39	206.281	331.591	10.5722	9	873
40	206.335	330.373	10.8943	9	903
41	205.398	330.678	10.2684	9	932
42	205.717	332.102	10.1798	9	963
43	204.064	333.465	9.15751	9	989
44	205.458	332.229	9.99105	9	1014
45	204.81	333.826	9.18761	9	1037
46	204.309	335.176	8.99114	9	1060
47	204.542	334.764	9.10189	9	1086
48	203.886	333.555	9.21044	9	1112
49	205.198	331.93	10.3178	9	1140
50	203.245	333.481	9.53918	9	1162
51	203.325	333.863	9.26171	9	1184
52	203.864	332.349	9.60192	9	1209
53	204.098	331.504	9.92551	9	1232
54	204.168	330.925	10.0262	9	1254
55	203.93	330.998	10.2002	9	1279
56	203.668	330.87	10.2652	9	1301
57	203.08	330.971	9.96812	9	1323
58	203.735	330.855	10.173	9	1345
59	203.65	332.089	10.047	9	1369
60	203.959	331.511	9.87395	9	1398
61	204.229	331.3	10.6509	9	1424
62	203.687	331.062	10.5743	9	1450
63	203.054	333.877	9.91665	9	1477
64	203.179	333.905	10.0717	9	1504
65	204.505	333.39	10.777	9	1534
66	204.609	333.542	10.76	9	1558
67	204.404	334.587	10.5267	9	1584
68	203.86	335.907	10.1004	9	1610
69	203.679	336.387	10.0709	9	1635
70	203.15	336.732	10.0691	9	1659
71	202.795	336.894	9.97886	9	1688
72	203.52	335.516	10.2159	9	1711
73	204.616	334.903	10.5611	9	1741
74	204.223	335.505	10.3717	9	1771
75	205.899	332.36	11.3174	9	1813
77	208.503	349.495	13.249	9	1870
78	209.899	349.225	11.4066	9	1899
79	210.787	348.304	12.7368	9	1927
80	225.841	341.252	22.5	9	1959
1	155.708	284.181	9.7778	10	10
2	156.472	284.535	9.80397	10	29
3	155.658	284.534	9.91949	10	48
4	155.435	284.742	9.83433	10	69
5	155.941	283.761	9.99389	10	90
6	156.074	283.372	10.1826	10	111
7	156.336	283.451	10.1541	10	125
8	156.291	283.428	10.1842	10	140
9	156.086	282.968	10.3261	10	158
10	155.396	283.523	10.1836	10	175
11	155.531	283.37	10.2247	10	197
12	155.359	283.439	10.3401	10	218
13	156.223	282.764	10.4291	10	241
14	156.625	282.458	10.4206	10	263
15	156.965	282.052	10.8632	10	283
16	156.452	282.42	10.7001	10	303
17	155.895	282.921	10.6653	10	322
18	155.968	283.084	10.9939	10	346
19	156.07	283.598	10.8911	10	369
20	156.416	283.148	11.3141	10	406
21	157.149	282.585	11.4425	10	434
22	156.849	283.754	11.1143	10	455
23	156.2	284.549	10.8679	10	478
24	155.628	285.074	10.8981	10	501
25	155.543	285.295	10.7705	10	528
26	156.506	284.631	10.81	10	548
27	156.53	284.45	11.4087	10	584
28	155.943	285.793	10.7873	10	599
29	156.016	285.973	10.9684	10	623
30	155.685	286.062	11.1473	10	648
31	155.654	286.091	10.8874	10	671
32	155.565	286.247	10.9861	10	694
33	155.969	286.189	10.8486	10	726
34	156.26	286.218	10.8342	10	751
35	157.006	285.213	11.1437	10	774
36	156.811	285.369	11.0622	10	796
37	156.395	285.597	11.0316	10	820
38	156.232	285.288	11.0696	10	844
39	156.193	285.132	11.0192	10	872
40	156.714	284.68	11.1159	10	902
41	157.208	284.374	11.1857	10	931
42	156.757	284.49	11.0998	10	962
43	156.536	284.658	10.9186	10	988
44	156.083	284.307	11.0903	10	1013
45	155.828	284.373	11.1123	10	1036
46	155.808	284.017	11.5201	10	1070
47	156.076	284.464	11.2136	10	1085
48	156.038	284.397	11.6179	10	1126
49	156.479	283.693	11.5819	10	1152
50	156.234	283.987	11.5493	10	1176
51	155.511	284.034	11.4773	10	1196
52	154.896	284.04	11.6018	10	1218
53	155.32	284.361	11.4096	10	1242
54	155.098	283.926	11.7007	10	1265
55	155.339	283.487	11.7641	10	1290
56	155.624	283.576	11.8775	10	1311
57	154.99	284.024	11.8766	10	1336
58	155.044	283.844	11.7439	10	1356
59	154.693	284.326	11.8734	10	1384
60	155.083	284.092	11.8261	10	1410
61	155.718	284.463	12.057	10	1438
62	155.738	284.609	12.0312	10	1463
63	156.344	284.691	12.3383	10	1492
64	155.727	284.854	12.1958	10	1521
65	155.359	285.388	12.1696	10	1548
66	154.887	285.689	12.204	10	1571
67	155.225	285.717	12.3862	10	1596
68	155.669	285.352	12.4896	10	1622
69	156.289	285.222	12.4582	10	1645
70	156.549	285.35	12.5513	10	1672
71	156.894	284.651	12.6727	10	1697
72	156.609	284.92	12.5481	10	1723
73	155.496	286.071	12.6809	10	1753
74	157.046	285.241	12.6221	10	1779
75	157.275	285.162	12.5784	10	1811
76	157.056	285.36	12.547	10	1837
77	156.743	285.252	12.8532	10	1867
78	155.508	286.079	12.6335	10	1896
79	155.171	286.279	12.6811	10	1924
80	155.623	285.826	12.6745	10	1955
81	156.859	285.076	12.5508	10	1983
82	157.365	284.809	12.6418	10	2008
83	157.12	284.475	12.7434	10	2036
84	156.397	284.52	12.5588	10	2070
85	155.477	285.184	12.7112	10	2099
86	155.356	285.389	12.8203	10	2129
87	156.354	284.717	12.8135	10	2151
88	157.275	283.721	12.8911	10	2178
89	156.884	284.011	12.7808	10	2205
90	156.102	284.465	12.8593	10	2227
91	155.242	284.264	12.994	10	2252
92	154.697	284.13	12.9642	10	2275
93	155.388	284.426	12.8905	10	2308
94	155.035	284.758	13.0196	10	2332
95	156.131	284.016	12.8761	10	2364
96	155.889	283.806	12.8536	10	2393
97	154.888	284.097	12.9533	10	2422
98	154.973	283.603	13.1649	10	2452
99	154.523	284.762	13.1378	10	2479
100	155.228	284.636	13.1562	10	2506
101	156.193	283.868	13.2591	10	2537
102	155.068	284.551	13.3368	10	2567
103	155.96	284.647	13.2067	10	2596
104	155.678	284.317	13.7144	10	2625
105	155.197	284.528	13.7362	10	2662
106	155.29	284.729	14.0739	10	2696
107	155.501	284.713	13.9986	10	2724
108	156.818	283.917	13.8067	10	2748
109	158.012	282.714	14.4254	10	2774
110	156.789	283.069	14.7809	10	2803
111	157.686	282.407	14.9558	10	2826
112	157.562	282.151	15.0942	10	2854
113	157.196	282.924	14.9407	10	2882
114	157.422	282.844	15.1592	10	2906
115	158.431	282.042	15.5394	10	2934
116	159.408	281.451	15.7037	10	2958
117	160.053	281.221	15.9788	10	2983
118	160.32	280.527	16.7769	10	3007
119	159.643	280.365	17.0866	10	3029
120	159.258	280.54	16.833	10	3052
121	159.148	280.566	16.8278	10	3078
122	160.003	280.098	17.313	10	3106
123	159.453	280.7	16.159	10	3129
124	160.685	279.801	17.2582	10	3151
125	160.095	279.86	17.0003	10	3170
126	159.469	279.925	17.0442	10	3191
127	159.051	280.129	17.261	10	3210
128	159.3	279.766	17.2521	10	3228
129	159.711	279.419	17.1617	10	3249
130	160.256	279.113	17.2903	10	3270
131	159.695	278.926	17.1404	10	3291
132	159.426	279.205	16.921	10	3313
133	158.26	279.711	16.8784	10	3336
134	157.886	279.67	16.8621	10	3360
135	158.186	279.55	17.1619	10	3386
136	159.084	279.045	17.0648	10	3411
137	159.637	278.501	17.5386	10	3437
138	160.183	278.058	18.6583	10	3465
139	158.47	278.877	17.3876	10	3490
140	158.495	279.156	17.8957	10	3517
141	158.198	278.551	18.1978	10	3544
142	158.691	279.371	17.539	10	3568
143	160.002	278.848	18.0704	10	3593
144	160.516	278.865	18.4548	10	3618
145	159.794	278.981	18.0041	10	3641
146	158.732	279.337	18.265	10	3662
147	158.733	279.758	18.3441	10	3686
148	158.956	279.94	18.8837	10	3707
149	159.061	280.385	17.6759	10	3728
150	159.873	280.208	17.9454	10	3746
151	160.042	279.966	18.0602	10	3766
152	159.582	280.217	18.6951	10	3786
153	158.786	280.846	17.8565	10	3804
154	158.81	281.05	17.8405	10	3823
155	159.417	280.846	17.9167	10	3841
156	160.4	280.606	18.3261	10	3857
157	160.914	280.376	18.3063	10	3879
158	160.988	280.233	18.362	10	3903
159	159.408	280.608	18.3549	10	3927
160	159.678	280.326	18.5554	10	3947
161	159.598	280.459	18.3961	10	3968
162	159.619	279.986	18.3245	10	3986
163	160.729	279.653	18.6554	10	4001
164	161.202	279.275	18.5055	10	4018
165	160.819	279.424	18.4198	10	4034
166	159.407	280.077	18.4467	10	4050
167	158.796	280.264	18.1107	10	4071
168	158.648	280.263	17.6867	10	4089
169	159.611	279.958	17.8427	10	4107
170	160.151	279.229	18.2573	10	4121
171	159.733	279.324	18.6507	10	4138
172	158.783	279.914	17.788	10	4155
173	159.331	279.135	18.0488	10	4177
174	159.87	279.099	18.6749	10	4201
175	160.52	278.22	19.487	10	4228
176	163.572	279.018	22.5	10	4255
177	160.245	278.423	20.0553	10	4274
178	159.444	279.13	19.437	10	4300
179	159.069	279.193	19.7532	10	4326
180	158.977	278.995	18.9749	10	4350
181	159.236	279.224	19.3851	10	4374
182	158.951	279.522	19.6033	10	4402
183	160.58	278.986	20.8604	10	4423
184	160.456	278.828	20.0543	10	4444
185	160.124	279.11	19.1775	10	4465
186	158.272	280.327	19.1149	10	4482
187	159.042	280.03	20.0053	10	4500
188	158.456	280.487	19.176	10	4521
189	158.858	279.815	19.4358	10	4544
190	160.222	279.746	19.037	10	4563
191	160.328	279.662	19.1301	10	4586
192	159.349	280.424	18.2041	10	4608
193	158.334	281.273	18.211	10	4632
194	158.073	281.498	18.0221	10	4656
195	158.595	281.302	17.9974	10	4682
196	159.374	281.394	18.0581	10	4709
197	159.759	280.936	17.8503	10	4733
198	159.512	281.084	18.0912	10	4761
199	158.513	281.46	18.0242	10	4785
200	157.897	281.888	17.4809	10	4810
201	157.612	281.828	17.7943	10	4835
202	158.263	281.315	18.0167	10	4862
203	158.846	280.544	18.5708	10	4886
204	159.994	279.723	18.4906	10	4911
205	158.958	280.106	18.168	10	4933
206	158.05	280.595	17.9522	10	4960
207	157.483	280.755	18.0874	10	4988
208	158.604	280.37	17.8601	10	5022
209	157.61	280.613	17.9187	10	5053
210	158.327	280.149	18.1116	10	5081
211	159.274	279.761	17.9176	10	5111
212	158.742	279.693	18.1162	10	5146
213	157.622	280.058	18.1224	10	5174
214	157.005	280.493	18.5108	10	5203
215	157.138	280.597	18.7197	10	5228
216	157.735	280.518	18.479	10	5254
217	158.364	280.149	19.1668	10	5278
218	159.143	279.771	19.0696	10	5303
219	159.148	279.855	18.7764	10	5328
220	157.838	280.685	19.5635	10	5350
221	157.766	280.724	20.0311	10	5377
222	157.737	280.799	20.054	10	5398
223	158.188	280.675	19.8485	10	5424
224	159.438	280.124	19.9924	10	5448
225	158.923	280.461	20.5809	10	5478
226	158.855	280.418	21.0413	10	5507
227	159.076	281.512	19.7149	10	5535
228	159.767	281.765	20.2277	10	5563
229	160.361	281.971	22.5	10	5594
230	163.456	281.181	22.5	10	5620
1	13.0255	401	10.4637	11	11
2	12.9887	400.985	10.8412	11	30
3	12.5957	400.959	10.6516	11	50
4	12.6475	400.918	10.6253	11	70
5	12.7627	400.742	10.8673	11	91
6	12.9418	400.121	10.6062	11	112
7	12.6883	400.514	10.8434	11	126
8	12.5792	400.463	10.5218	11	141
9	12.4795	399.887	10.9272	11	159
10	12.7623	399.379	13.2129	11	184
11	36.3934	400.637	16.6838	11	206
12	37.3202	400.416	17.7174	11	230
13	37.2601	400.43	17.6362	11	252
14	39.166	400.617	19.3727	11	272
15	2.98023e-08	418.286	5.22277	11	280
1	415.403	317.312	2.5	12	12
2	415.993	316.202	2.5	12	31
3	415.55	316.722	2.5	12	51
4	415.376	317.457	2.5	12	71
5	415.082	317.301	2.5	12	92
6	414.893	316.402	2.5	12	113
7	415.255	315.283	2.5	12	127
8	415.161	315.009	2.5	12	142
9	415.036	315.923	2.5	12	160
10	415.226	316.805	2.5	12	178
11	414.596	316.736	2.5	12	198
12	415.002	317.185	2.5	12	219
13	414.89	315.927	2.5	12	243
14	415.343	315.006	2.5	12	264
15	415.267	315.534	2.5	12	285
16	414.936	315.703	2.5	12	304
17	414.95	316.809	2.5	12	323
18	415.029	317.079	2.5	12	347
19	415.195	317.097	2.5	12	372
20	415.617	316.619	2.5	12	397
21	415.968	315.804	2.5	12	426
22	415.862	316.336	2.5	12	456
23	416.137	316.886	2.5	12	480
24	415.51	317.43	2.5	12	503
25	415.16	317.434	2.5	12	530
26	415.644	317.815	3.9253	12	552
27	415.78	316.738	2.5	12	574
28	415.719	317.072	4.20262	12	602
29	416.164	316.787	3.8059	12	625
30	415.966	316.419	4.30489	12	649
31	416.177	317.432	4.41455	12	673
32	416.389	318.547	4.27267	12	696
33	416.299	318.363	4.26319	12	729
34	416.721	318.037	4.55871	12	754
35	416.447	317.551	4.26007	12	777
36	416.625	317.245	4.13912	12	799
37	416.751	317.291	4.13351	12	824
38	416.664	317.718	4.13917	12	848
39	416.329	318.245	4.29006	12	876
40	415.824	317.251	4.27208	12	907
41	416.097	316.809	4.03315	12	935
42	416.265	316.921	3.95787	12	966
43	416.389	316.241	3.88531	12	991
44	415.908	316.408	4.26033	12	1016
45	415.788	316.995	4.1056	12	1039
46	415.296	317.423	4.32971	12	1062
47	415.362	316.925	4.59869	12	1089
48	415.953	317.313	4.89243	12	1113
49	415.842	316.273	4.48516	12	1142
50	415.701	315.779	4.4827	12	1164
51	415.258	316.081	4.88084	12	1186
52	414.843	316.46	4.56608	12	1211
53	414.732	316.161	4.99779	12	1233
54	414.772	316.15	5.02608	12	1256
55	414.645	316.243	5.33888	12	1281
56	414.925	315.093	5.18437	12	1302
57	414.942	315.24	5.30491	12	1325
58	415.385	315.968	5.30447	12	1347
59	415.188	317.152	5.18409	12	1373
60	415.457	316.916	5.54464	12	1399
61	415.751	317.009	5.63011	12	1427
62	415.824	316.425	5.49882	12	1453
63	415.568	315.412	5.71219	12	1479
64	415.393	315.719	5.97944	12	1506
65	414.987	316.132	5.67952	12	1536
1	328.284	364.393	2.5	13	13
2	328.149	363.723	2.5	13	32
3	328.178	364.031	2.5	13	52
4	327.261	364.459	2.5	13	72
5	327.938	363.824	2.5	13	93
6	328.653	362.912	2.5	13	114
7	328.859	362.618	2.5	13	128
8	328.158	362.836	2.5	13	143
9	327.795	363.328	2.5	13	161
10	327.387	363.928	2.5	13	179
11	327.111	363.844	2.5	13	199
12	327.242	363.579	2.5	13	220
13	328.08	363.018	2.5	13	244
14	327.927	362.853	2.5	13	265
15	327.862	363.324	2.5	13	286
16	327.432	363.56	2.5	13	305
17	327.072	364.007	2.5	13	324
18	327.607	363.352	2.5	13	348
19	328.329	362.975	2.5	13	373
20	328.6	363.096	2.5	13	398
21	327.872	363.594	2.5	13	427
22	327.998	364.336	2.5	13	457
23	328.04	364.138	2.5	13	481
24	327.711	364.507	2.5	13	504
25	328.17	364.661	2.5	13	531
26	328.252	364.36	2.5	13	550
27	329.099	363.591	2.5	13	575
28	328.727	363.909	4.08479	13	603
29	329.032	363.891	4.22078	13	626
30	328.9	363.925	4.23627	13	650
31	328.426	364.447	2.5	13	672
32	328.463	365.185	4.45798	13	697
33	328.46	365.119	4.38605	13	730
34	328.612	364.657	4.39804	13	755
35	328.577	364.819	4.3934	13	778
36	329.124	364.385	4.28731	13	800
37	328.739	364.882	4.39789	13	825
38	328.558	364.983	4.0855	13	849
39	328.43	364.966	4.1436	13	878
40	328.591	364.525	4.19425	13	908
41	329.021	364.338	4.49652	13	936
42	329.046	363.705	3.98353	13	967
43	329.188	363.612	3.84821	13	992
44	328.707	364.03	4.17856	13	1017
45	328.043	364.352	4.35712	13	1040
46	328.037	364.019	4.25683	13	1063
47	328.143	363.582	4.79756	13	1091
48	327.695	363.728	4.92337	13	1115
49	327.621	363.787	5.19861	13	1143
50	327.883	363.357	4.97273	13	1166
51	327.854	363.111	4.91127	13	1187
52	328.128	363.187	4.76146	13	1213
53	328.067	363.632	5.28086	13	1235
54	327.748	363.639	5.1856	13	1258
55	328.115	363.638	5.32266	13	1283
56	328.342	363.435	5.17814	13	1304
57	328.217	363.597	5.22366	13	1327
58	328.259	363.862	5.39861	13	1349
59	327.497	363.858	5.56273	13	1375
60	327.698	364.065	5.45819	13	1401
61	327.811	364.021	5.88949	13	1429
62	328.344	363.724	5.75075	13	1455
63	328.593	363.793	5.92759	13	1480
64	328.603	364.003	6.02885	13	1507
65	328.141	364.387	6.04218	13	1537
66	328.111	364.442	6.20627	13	1560
67	327.864	364.512	6.26186	13	1590
68	328.159	364.552	6.56335	13	1615
69	328.228	364.6	6.50949	13	1639
70	328.364	364.642	6.76053	13	1664
71	327.976	364.994	6.59339	13	1691
72	327.922	365.051	6.46673	13	1715
73	328.256	365.107	6.56764	13	1747
74	328.688	365.108	6.60571	13	1775
75	329.013	364.56	6.40368	13	1806
76	328.157	365.329	6.77969	13	1834
77	328.408	365.422	6.76727	13	1863
78	328.538	364.953	6.65321	13	1889
79	329.491	364.162	6.47315	13	1919
80	329.93	363.495	6.2934	13	1947
81	328.968	364.429	6.38324	13	1972
82	328.543	365.005	6.66747	13	1999
83	328.289	365.2	6.87749	13	2027
84	327.979	364.901	6.85517	13	2058
85	328.064	364.686	6.88666	13	2090
86	328.836	363.638	6.71238	13	2120
87	328.843	363.797	6.84032	13	2143
88	327.642	364.585	6.91688	13	2170
89	327.336	364.399	6.94048	13	2194
90	326.99	364.622	7.17548	13	2218
91	327.573	363.773	6.97956	13	2242
92	327.95	363.581	6.7686	13	2268
93	328.43	363.3	7.07848	13	2298
94	328.881	363.122	7.02761	13	2324
95	327.71	363.556	7.08052	13	2355
96	326.841	364.249	7.27816	13	2386
97	326.618	364.359	7.39033	13	2413
98	327.361	364.196	7.26885	13	2441
99	327.968	363.47	7.33118	13	2469
100	328.972	363.068	7.31946	13	2498
101	328.575	362.812	7.40804	13	2527
102	327.03	364.278	7.49748	13	2558
103	327.343	364.653	7.66328	13	2587
104	327.296	364.564	7.63275	13	2617
105	327.709	364.723	7.82317	13	2655
106	328.252	364.521	7.84144	13	2684
107	329.139	364.105	7.78549	13	2712
108	328.772	364.63	7.68255	13	2738
109	328.35	365.119	7.9918	13	2763
110	328.725	364.883	7.76466	13	2791
111	328.346	365.194	7.82182	13	2817
112	328.77	364.597	7.78955	13	2843
113	329.782	363.742	7.72473	13	2867
114	329.621	363.664	7.6047	13	2891
115	329.271	364.619	7.70913	13	2922
116	328.135	365.781	8.20394	13	2948
117	328.088	365.973	8.20598	13	2973
118	328.266	365.839	7.98317	13	2997
119	328.824	365.329	7.9818	13	3018
120	329.98	364.637	7.75665	13	3042
121	329.84	364.905	7.81061	13	3065
122	329.198	365.42	8.02489	13	3092
123	328.848	365.505	8.00063	13	3120
124	328.025	365.781	8.17565	13	3142
125	328.576	365.398	8.0358	13	3164
126	329.39	364.727	7.95777	13	3185
127	330.004	364.078	7.85713	13	3203
128	329.7	364.016	7.88307	13	3221
129	328.861	364.871	7.91266	13	3239
130	328.213	365.124	8.04023	13	3260
131	328.411	364.239	8.05134	13	3281
132	328.548	364.175	7.80849	13	3302
133	329.404	363.558	7.9188	13	3326
134	329.527	362.918	7.91583	13	3350
135	328.612	363.399	7.99764	13	3376
136	328.078	364.272	8.27563	13	3400
137	328.008	364.692	8.56153	13	3427
138	327.941	364.668	8.28668	13	3452
139	328.238	364.33	8.421	13	3479
140	329.081	363.669	8.35965	13	3504
141	329.143	364.077	8.40294	13	3531
142	329.008	364.485	8.53972	13	3558
143	327.753	364.742	8.895	13	3587
144	327.52	365.336	8.95268	13	3610
145	328.328	365.089	8.62755	13	3633
146	328.895	364.286	8.60872	13	3653
147	328.87	364.309	8.6383	13	3679
148	329.326	364.338	8.85581	13	3701
149	328.197	365.061	9.0436	13	3721
150	327.889	365.834	9.10172	13	3739
151	327.85	365.516	9.14023	13	3759
152	328.299	365.739	9.0948	13	3778
153	329.511	365.087	9.0801	13	3797
154	330.006	364.718	8.92821	13	3815
155	330.223	365.072	9.35773	13	3834
156	329.012	365.659	9.31777	13	3851
157	328.109	366.098	9.36089	13	3872
158	328.188	366.498	9.35651	13	3893
159	329.349	365.287	9.06593	13	3915
160	329.865	365.078	9.091	13	3939
161	330.473	364.466	9.1199	13	3959
162	329.818	365.124	9.1078	13	3979
163	328.89	365.718	9.3155	13	3994
164	328.321	366.08	9.33459	13	4012
165	328.32	365.703	9.1848	13	4027
166	329.515	364.56	9.01035	13	4045
167	329.72	363.705	9.09855	13	4063
168	329.582	363.913	9.19142	13	4082
169	328.372	364.61	9.37226	13	4102
170	327.751	365.353	9.29648	13	4117
171	327.419	365.242	9.4227	13	4133
172	327.965	365.172	9.37962	13	4151
173	328.358	364.332	9.43833	13	4168
174	328.052	364.317	9.48371	13	4190
175	328.874	362.995	9.33028	13	4216
176	328.893	362.479	9.25864	13	4240
177	328.893	362.552	9.43144	13	4263
178	328.364	363.527	9.50375	13	4289
179	328.248	363.651	9.59811	13	4314
180	328.071	364.526	9.8263	13	4339
181	328.815	364.13	9.75689	13	4365
182	329.354	363.752	9.66764	13	4391
183	328.78	365.048	9.88657	13	4415
184	327.724	365.384	9.95624	13	4438
185	327.555	365.5	9.97681	13	4457
186	329.109	364.273	9.78177	13	4474
187	328.848	364.616	9.94618	13	4492
188	329.952	364.109	9.83887	13	4512
189	329.729	364.33	9.91035	13	4535
190	327.989	365.999	10.0536	13	4556
191	328.105	365.777	10.1626	13	4577
192	328.111	365.931	10.0692	13	4602
193	329.054	365.478	10.0636	13	4627
194	329.61	364.64	9.95619	13	4650
195	330.316	364.086	9.98036	13	4677
196	329.353	364.382	9.94617	13	4703
197	328.421	365.124	10.0546	13	4726
198	327.923	365.69	10.0235	13	4752
199	328.566	365.207	9.94618	13	4777
200	329.139	364.29	9.85436	13	4802
201	330.066	363.255	9.78461	13	4827
202	329.9	362.779	9.73564	13	4855
203	329.321	363.306	9.88232	13	4880
204	328.326	364.567	10.0232	13	4903
205	328.123	364.039	9.91782	13	4927
206	328.356	364.188	10.0077	13	4951
207	328.751	363.654	9.89285	13	4979
208	329.366	363.082	9.95359	13	5012
209	329.379	362.362	9.87907	13	5042
210	328.28	362.715	10.0188	13	5073
211	327.564	363.574	10.1609	13	5103
212	327.391	363.924	10.2403	13	5136
213	327.829	363.415	10.2036	13	5165
214	328.603	362.646	10.118	13	5193
215	329.352	362.069	10.1119	13	5220
216	328.725	362.486	10.2371	13	5245
217	328.053	363.441	10.281	13	5271
218	327.791	364.003	10.4142	13	5293
219	327.065	364.347	10.5064	13	5318
220	328.648	362.987	10.4221	13	5340
221	329.082	362.924	10.4722	13	5364
222	329.482	362.552	10.4245	13	5387
223	328.792	363.289	10.409	13	5414
224	327.084	365.158	10.825	13	5439
225	328.872	363.608	10.6777	13	5466
226	329.242	363.859	10.6934	13	5493
227	329.82	363.07	10.5603	13	5520
228	329.05	364.028	10.6715	13	5550
229	329.072	363.847	10.6643	13	5573
230	328.554	364.33	10.6636	13	5599
231	328.7	364.633	10.7383	13	5625
232	328.782	364.679	11.0371	13	5653
233	328.889	364.726	10.8869	13	5679
234	329.712	363.802	10.4489	13	5703
235	328.977	364.035	10.8681	13	5727
236	329.47	364.195	10.7298	13	5753
237	328.718	364.42	10.6588	13	5778
238	328.28	364.818	10.7312	13	5800
239	328.815	364.145	10.7268	13	5820
240	328.96	363.995	10.6534	13	5842
241	329.076	363.48	10.834	13	5863
1	77.877	252.105	12.3787	14	15
2	93.0348	229.381	22.5	14	38
3	93.4705	226.818	22.5	14	58
4	92.1434	223.551	20.3185	14	75
5	91.1295	222.745	17.075	14	95
6	91.1291	222.934	17.7149	14	115
7	91.0515	222.909	17.6354	14	130
8	90.8361	223.164	18.1606	14	147
9	90.5907	223.434	18.0372	14	164
10	90.4828	223.112	18.5349	14	182
11	90.8487	223.13	18.8888	14	202
12	90.823	222.986	18.8175	14	224
13	90.7113	222.964	18.3752	14	247
14	90.7347	223.27	18.7452	14	267
15	91.0256	223.367	18.96	14	290
16	91.0724	223.36	19.3901	14	309
17	91.0895	223.538	20.3951	14	327
18	93.9479	222.47	22.5	14	356
19	94.7596	221.465	22.5	14	383
20	94.8951	221.014	22.5	14	410
21	93.5193	221.333	22.5	14	441
23	106.87	241.273	2.5	14	469
24	103.323	249.293	5.35922	14	493
25	101.197	250.939	6.44351	14	518
26	109.333	236.276	3.85824	14	542
27	110.724	230.846	2.5	14	566
28	111.53	228.639	2.5	14	589
29	110.119	228.651	2.5	14	613
30	110.466	231.08	2.5	14	639
31	107.883	227.26	2.5	14	663
32	98.7577	224.808	5.24837	14	687
33	93.3318	225.08	8.61236	14	719
34	89.7043	229.014	9.22447	14	744
35	88.539	233.5	15.0157	14	783
36	89.4525	237.92	17.9678	14	806
37	88.614	238.784	17.848	14	832
38	86.762	240.229	18.5024	14	859
39	91.1493	235.826	19.3908	14	888
40	92.5314	235.004	20.6786	14	916
41	92.0918	234.877	20.0385	14	945
42	93.8276	228.409	22.5	14	982
43	93.9762	228.139	22.5	14	1007
44	94.736	227.583	22.5	14	1030
45	95.348	225.771	22.5	14	1054
1	163.419	302.942	14.5171	15	16
2	163.115	302.78	15.1761	15	35
3	163.215	302.891	15.0479	15	56
4	163.114	302.752	14.9746	15	80
5	163.179	302.765	14.8487	15	99
6	162.969	302.767	15.0704	15	118
7	162.82	302.727	15.1099	15	133
8	162.68	302.567	15.0067	15	149
9	162.536	302.406	15.2991	15	167
10	162.887	302.504	14.746	15	185
11	162.793	302.164	14.9881	15	204
12	162.606	302.164	15.1397	15	228
13	162.5	302.295	15.2316	15	250
14	162.337	302.296	15.3926	15	270
15	162.519	302.322	15.2611	15	292
16	162.56	302.752	15.4628	15	311
17	163.08	302.549	15.0416	15	331
18	163.273	302.579	15.3111	15	353
19	163.132	302.578	15.1709	15	377
20	163.12	302.806	15.6098	15	408
21	162.981	303.049	15.4918	15	435
22	163.198	303.154	16.3095	15	465
23	163.096	303.3	16.2131	15	488
24	163.46	303.387	15.6061	15	513
25	163.676	303.402	15.3964	15	537
26	163.349	303.487	15.8111	15	560
27	163.466	303.443	15.8785	15	585
28	163.266	303.74	16.0174	15	608
29	163.377	304.008	16.1613	15	633
30	163.748	304.095	15.7992	15	656
31	164.098	303.61	16.0177	15	680
32	164.353	303.785	15.8422	15	709
33	164.013	303.698	15.8134	15	737
34	163.945	303.675	15.7929	15	762
35	163.872	304.165	15.793	15	786
36	163.903	304.179	15.7632	15	807
37	163.899	304.026	16.2018	15	833
38	164.215	303.801	16.0697	15	861
39	164.317	303.539	15.759	15	891
40	164.247	303.392	16.2901	15	922
41	163.915	303.624	15.5461	15	950
42	163.784	303.107	16.0327	15	976
43	163.606	302.926	15.8404	15	1003
44	163.956	302.888	15.8283	15	1025
45	163.92	302.86	15.5467	15	1049
46	163.654	302.759	15.76	15	1071
47	163.517	302.929	15.6502	15	1097
48	163.322	302.959	15.7451	15	1127
49	163.196	302.846	16.3254	15	1154
50	162.977	303.238	16.238	15	1177
51	162.885	302.927	16.2955	15	1200
52	163.259	302.682	16.2167	15	1220
53	162.639	302.817	16.1608	15	1244
54	162.788	302.514	15.9851	15	1267
55	162.616	302.701	16.1861	15	1292
56	162.706	302.462	16.5297	15	1313
57	163.102	302.265	15.971	15	1337
58	162.995	302.212	16.5109	15	1360
59	163.347	302.751	16.1803	15	1386
60	163.504	302.571	17.2242	15	1413
61	163.051	302.876	17.0739	15	1440
62	163.198	303.059	17.036	15	1464
63	162.995	303.222	17.2256	15	1494
64	163.285	303.169	17.0329	15	1522
65	163.405	303.266	17.1996	15	1549
66	163.677	303.018	16.7087	15	1573
67	163.591	303.27	16.8525	15	1598
68	163.493	303.771	16.9642	15	1623
69	163.374	303.791	17.6055	15	1646
70	163.694	303.962	17.5907	15	1675
71	163.675	303.883	17.5959	15	1701
72	164.564	303.705	17.7069	15	1726
73	163.82	304.217	17.2566	15	1758
74	164.287	304.221	18.2515	15	1786
75	164.57	304.342	18.0063	15	1816
76	164.539	304.053	18.3261	15	1841
77	163.985	304.279	17.3438	15	1872
78	163.782	304.204	17.2733	15	1902
79	163.447	304.334	17.1802	15	1929
80	163.506	304.18	17.2575	15	1956
81	164.079	303.763	17.4815	15	1986
82	164.598	303.509	17.6701	15	2012
83	164.31	303.717	17.954	15	2040
84	164.054	303.429	17.8973	15	2072
85	163.086	303.85	17.3318	15	2103
86	162.997	304.068	17.4678	15	2131
87	163.058	303.581	17.6371	15	2154
88	163.855	303.108	17.6772	15	2181
89	163.776	303.127	18.0789	15	2207
90	163.741	302.68	17.7112	15	2229
91	163.228	302.872	17.7729	15	2254
92	162.497	302.862	17.2096	15	2278
93	162.32	302.992	17.7335	15	2312
94	162.355	303.317	17.4888	15	2339
95	163.045	302.66	17.6733	15	2369
96	163.328	302.578	18.1451	15	2398
97	163.077	302.497	17.5534	15	2425
98	162.6	303.106	17.2054	15	2456
99	162.262	303.315	17.8638	15	2484
100	162.611	303.052	17.7317	15	2510
101	162.828	303.309	17.9305	15	2542
102	163.168	303.134	17.7559	15	2571
103	163.611	303.175	17.7009	15	2599
104	163.655	303.451	18.0926	15	2629
105	163.298	303.767	18.4322	15	2665
106	162.438	304.026	17.8548	15	2698
107	162.617	303.598	18.1457	15	2725
108	163.01	304.226	18.0803	15	2749
109	163.181	303.974	18.7884	15	2775
110	163.131	304.146	18.1449	15	2804
111	163.406	303.764	18.2344	15	2827
112	163.624	303.947	18.9422	15	2855
113	162.939	304.577	18.1327	15	2883
114	162.935	304.762	18.3319	15	2907
115	163.077	304.395	18.6316	15	2935
116	163.706	304.596	18.7512	15	2959
117	164.536	304.239	19.4673	15	2984
118	164.406	304.447	19.156	15	3008
119	163.633	304.678	18.1267	15	3030
120	163.281	304.769	18.3394	15	3054
121	163.529	304.799	18.184	15	3079
122	163.825	304.495	18.6232	15	3107
123	163.514	304.451	19.0037	15	3132
124	164.411	303.904	19.1393	15	3152
125	164.16	303.62	18.6464	15	3171
126	163.578	304.033	18.7381	15	3192
127	163.261	304.197	18.4052	15	3211
128	163.212	304.098	18.9114	15	3229
129	163.674	303.601	18.5542	15	3250
130	163.988	303.207	18.821	15	3272
131	163.814	303.33	18.5271	15	3292
132	163.671	303.18	19.4565	15	3316
133	162.669	303.563	18.5644	15	3337
134	162.421	303.593	18.3634	15	3361
135	162.723	303.543	18.5058	15	3387
136	163.112	303.545	18.9955	15	3413
137	163.459	303.039	19.7335	15	3440
138	163.372	303.145	20.0558	15	3466
139	163	303.334	19.2047	15	3491
140	162.395	303.876	18.9579	15	3518
141	162.52	303.938	18.9127	15	3546
142	163.088	303.801	18.8256	15	3569
143	163.492	303.628	19.9871	15	3595
144	163.83	303.451	19.6347	15	3619
145	163.685	303.644	20.275	15	3642
146	162.734	304.025	19.3283	15	3663
147	162.635	304.234	19.0545	15	3688
148	162.824	304.476	19.6647	15	3708
149	163.5	304	19.733	15	3729
150	164.055	304.046	20.5241	15	3747
151	164.2	304.127	22.5	15	3771
152	163.731	304.525	19.7271	15	3787
153	163.179	304.818	19.4872	15	3805
154	163.06	305.165	20.0213	15	3824
155	163.377	305.162	19.5798	15	3842
156	163.972	304.842	19.9401	15	3858
157	164.469	304.215	20.8046	15	3880
158	164.875	304.166	21.1255	15	3904
159	163.411	305.246	20.343	15	3928
160	163.336	304.976	19.6826	15	3948
161	163.276	305.107	20.5576	15	3969
162	163.542	304.721	20.7395	15	3987
163	164.028	304.623	20.6932	15	4002
164	164.49	303.895	20.4006	15	4019
165	164.296	303.932	20.7459	15	4036
166	163.116	304.399	19.6021	15	4051
167	162.97	304.745	19.9043	15	4072
168	162.885	304.465	19.8603	15	4091
169	163.59	304.262	20.3987	15	4108
170	163.452	303.984	22.5	15	4127
171	163.532	303.734	20.7738	15	4139
172	162.823	303.975	20.6683	15	4158
173	163.538	303.407	20.165	15	4179
174	162.894	303.596	20.7607	15	4203
175	163.405	303.095	20.575	15	4229
176	163.171	303.177	20.4966	15	4251
177	162.998	303.466	20.5697	15	4276
178	162.278	304.133	22.5	15	4307
179	162.388	304.175	20.5255	15	4327
180	162.39	303.97	20.0314	15	4351
181	162.638	304.049	21.1237	15	4375
182	162.217	304.365	22.5	15	4408
183	163.168	304.035	22.5	15	4429
184	163.812	303.475	22.5	15	4450
185	164.002	303.632	22.5	15	4471
186	162.763	304.839	20.9345	15	4483
187	162.719	304.94	20.0857	15	4501
188	162.869	304.976	22.5	15	4529
189	162.999	304.879	22.5	15	4549
190	163.919	304.1	22.5	15	4570
191	164.091	304.343	22.5	15	4595
192	164.117	304.469	22.5	15	4620
193	163.297	305.032	20.9241	15	4634
194	163.11	305.462	20.9442	15	4658
195	163.108	305.112	22.5	15	4693
196	163.82	304.746	22.5	15	4719
197	164.539	304.194	22.5	15	4745
198	164.367	304.171	22.5	15	4773
199	164.161	304.212	22.5	15	4796
200	163.377	304.493	20.9834	15	4812
201	162.948	304.977	20.9003	15	4837
202	163.292	304.634	20.7626	15	4863
203	163.392	303.974	21.2205	15	4887
204	164.038	303.531	20.9225	15	4912
205	163.626	303.497	21.2278	15	4935
206	163.356	303.662	20.4178	15	4961
207	162.793	304.169	22.5	15	5003
208	162.932	303.126	20.7627	15	5024
209	162.362	304.033	22.5	15	5063
210	162.871	303.552	22.5	15	5094
211	163.632	302.562	20.913	15	5112
212	163.425	302.545	22.5	15	5156
213	162.869	303.103	22.5	15	5185
214	162.344	303.324	20.9237	15	5204
215	162.047	304.121	22.5	15	5238
216	162.245	303.807	22.5	15	5264
217	163.067	303.493	22.5	15	5287
218	163.566	302.973	22.5	15	5311
219	163.492	303.555	22.5	15	5337
220	162.542	304.235	21.1931	15	5351
221	162.327	304.449	22.5	15	5383
222	162.428	304.834	22.5	15	5407
223	163.127	304.126	22.5	15	5433
224	163.811	303.875	22.5	15	5460
225	163.213	304.705	22.5	15	5488
226	163.357	304.442	22.5	15	5516
227	163.233	304.854	22.5	15	5544
228	162.944	304.796	22.5	15	5570
229	162.773	305.104	22.5	15	5595
230	163.59	304.706	22.5	15	5621
231	163.733	304.67	22.5	15	5647
232	163.873	303.965	22.5	15	5675
233	163.77	304.39	22.5	15	5698
234	163.312	304.75	22.5	15	5723
235	163.012	304.739	22.5	15	5750
236	163.716	304.805	22.5	15	5774
237	163.518	304.625	22.5	15	5796
238	163.762	303.956	22.5	15	5817
239	163.812	304.078	22.5	15	5839
240	163.226	304.035	22.5	15	5860
241	162.845	304.324	22.5	15	5879
1	198.898	196.472	22.5	16	17
2	199.441	197.099	22.5	16	37
3	198.715	196.667	22.5	16	57
1	262.65	69.5017	22.5	17	18
2	262.71	65.0481	17.6227	17	33
3	262.034	60.4897	17.3951	17	54
4	259.322	58.0687	16.6691	17	77
5	255.131	57.3136	12.6825	17	96
6	253.187	58.3646	8.62512	17	104
7	257.762	56.8395	7.81061	17	123
8	264.26	59.2154	7.49979	17	138
9	271.599	60.3131	5.93912	17	154
2	228.62	501.299	13.1002	18	34
3	227.068	503.322	12.2897	18	55
4	223.484	507.934	13.2195	18	79
2	448.666	302.571	12.9275	19	36
3	460.185	303.276	10.9589	19	53
4	459.926	308.381	9.31776	19	74
3	155.931	274.261	2.5	20	46
4	157.351	273.718	2.5	20	67
5	158.354	273.623	2.5	20	88
6	159.485	273.498	2.5	20	109
4	481.14	141.693	7.34993	21	66
5	498.524	137.148	11.682	21	97
4	328.993	455.936	7.98879	22	73
5	328.684	459.294	7.94947	22	94
7	319.42	453.677	2.5	22	129
8	315.215	455.582	2.5	22	144
9	314.159	456.115	2.5	22	163
10	295.284	475.896	15.2927	22	187
11	270.039	481.654	22.5	22	211
13	252.548	467.957	22.5	22	256
14	253.58	466.95	22.5	22	275
4	240.842	140.421	22.5	23	81
5	241.901	144.275	22.5	23	101
5	376.481	160.095	6.65639	24	87
6	376.594	159.572	6.45393	24	108
8	248.566	467.097	19.7893	25	151
10	242.942	464.287	10.2487	25	177
12	214.746	428.345	22.5	25	234
9	313.624	138.05	8.11554	26	156
10	312.274	138.682	6.95768	26	173
11	306.536	168.518	22.5	26	209
9	276.025	412.379	2.5	27	162
10	271.664	416.415	2.5	27	180
11	267.712	418.42	2.5	27	200
12	269.324	417.242	2.5	27	221
13	268.479	413.567	7.83845	27	245
14	268.697	410.553	8.80641	27	266
9	233.732	326.357	11.2997	28	166
10	233.576	326.97	10.1111	28	176
11	235.9	329.457	7.04419	28	195
12	224.476	338.587	12.4653	28	227
10	92.4469	104.353	14.9918	29	181
12	67.4864	77.2158	22.5	29	233
13	68.6763	70.2308	22.5	29	255
14	68.6672	69.3417	22.5	29	273
15	68.0481	62.9855	19.7202	29	289
16	68.2599	63.9319	18.1316	29	308
17	68.0943	64.0303	18.4426	29	326
18	68.0926	63.4393	19.4156	29	350
19	66.3822	39.4796	22.5	29	382
10	40.0688	462.565	22.5	30	188
11	47.3028	462.531	22.5	30	210
12	46.7968	462.521	22.5	30	235
11	315.746	230.162	6.03542	31	194
12	308.451	227.194	2.5	31	213
13	303.875	227.18	2.5	31	237
14	300.375	233.627	2.5	31	258
15	298.888	236.603	2.5	31	277
16	297.294	238.237	2.5	31	296
17	291.902	243.433	2.5	31	316
18	291.247	243.833	2.5	31	338
19	287.207	245.559	3.26251	31	363
20	283.448	246.577	4.41166	31	393
21	283.387	246.894	4.45883	31	421
22	283.008	247.132	4.46782	31	449
23	285.199	248.393	2.5	31	473
24	285.384	248.58	2.5	31	496
25	284.852	248.178	3.75102	31	522
26	284.704	248.545	4.03544	31	545
27	285.311	248.304	3.94693	31	569
28	285.2	248.554	4.10401	31	593
29	285.221	249.054	4.13954	31	616
30	285.622	248.779	3.96148	31	642
31	285.667	249.139	4.08761	31	666
32	285.634	249.276	4.44062	31	689
33	285.618	249.27	4.26731	31	723
34	285.48	248.997	4.39647	31	747
35	285.635	249.042	4.61161	31	770
36	286.003	248.722	4.09365	31	794
37	285.816	248.82	4.25675	31	815
38	286.151	248.52	3.89674	31	840
39	286.132	248.663	4.10752	31	868
40	286.086	248.398	4.10531	31	899
41	285.885	248.255	4.09065	31	929
42	286.388	247.849	4.08724	31	958
43	287.711	247.577	2.5	31	984
44	286.465	247.453	4.01055	31	1009
45	286.456	247.337	4.30315	31	1033
46	286.827	246.748	4.03371	31	1058
47	284.142	244.747	5.60547	31	1081
48	283.596	243.786	6.22265	31	1109
49	285.687	246.952	5.00842	31	1137
50	285.002	247.846	4.85744	31	1159
51	284.725	247.818	4.98602	31	1182
52	284.555	247.847	5.11215	31	1205
53	284.578	247.634	5.17981	31	1229
54	284.673	247.409	5.10765	31	1251
55	284.425	247.532	5.37037	31	1276
56	284.529	247.384	5.5118	31	1299
57	284.823	247.354	5.38802	31	1319
58	284.918	247.375	5.49242	31	1342
59	284.907	247.452	5.65616	31	1367
60	284.476	247.719	6.07192	31	1391
61	284.447	248.281	6.09474	31	1419
62	284.83	247.97	5.99154	31	1447
63	284.932	247.823	5.96224	31	1472
64	285.668	247.595	6.17608	31	1499
65	285.009	247.583	6.2951	31	1531
66	285.424	248.017	6.43117	31	1555
67	285.137	248.3	6.37457	31	1582
68	284.612	248.722	6.72456	31	1608
69	284.316	248.867	6.94215	31	1633
70	284.783	248.996	6.72036	31	1657
71	284.692	248.921	6.62997	31	1685
72	285.535	248.728	6.51641	31	1709
73	285.694	248.851	6.75819	31	1736
74	285.244	249.164	6.8102	31	1768
75	286.693	248.437	6.75962	31	1800
76	285.916	248.946	6.74386	31	1828
77	285.284	249.094	6.80398	31	1856
78	284.999	249.237	6.76079	31	1882
79	285.301	248.709	6.8575	31	1912
80	285.585	248.456	6.87286	31	1939
81	286.434	248.172	6.83726	31	1965
82	286.177	248.229	6.90278	31	1995
83	285.943	248.335	6.74427	31	2023
84	285.179	248.491	6.80273	31	2049
85	285.12	248.289	6.74459	31	2084
86	284.641	248.482	6.88362	31	2113
87	285.033	248.109	6.89542	31	2139
88	285.402	247.8	7.03065	31	2165
89	285.479	247.709	7.02787	31	2191
90	284.95	247.84	6.94599	31	2214
91	284.101	247.841	7.099	31	2239
92	283.809	248.039	7.1345	31	2266
93	284.543	247.489	7.24261	31	2294
94	284.516	247.506	7.26842	31	2320
95	285.281	247.089	7.17738	31	2350
96	284.572	247.599	7.35004	31	2380
97	283.907	247.829	7.47174	31	2408
98	283.318	247.993	7.59839	31	2434
99	283.792	248.358	7.50413	31	2463
100	284.493	247.941	7.77017	31	2493
101	285.104	247.96	7.68476	31	2522
102	284.314	248.238	7.63592	31	2553
103	284.417	248.238	7.57334	31	2582
104	284.174	248.834	7.96051	31	2611
105	284.083	249.088	7.81495	31	2645
106	283.901	248.783	7.96481	31	2676
107	284.58	249.102	8.01657	31	2707
108	285.23	248.702	8.08818	31	2732
109	285.401	249.125	8.11859	31	2757
110	284.253	249.335	8.07952	31	2785
111	284.457	249.464	8.13243	31	2812
112	284.571	249.44	8.06928	31	2838
113	284.968	249.305	8.14816	31	2861
114	285.288	249.424	8.11964	31	2886
115	285.891	249.312	8.09937	31	2915
116	285.892	249.333	8.27131	31	2942
117	285.569	249.334	8.24235	31	2967
118	285.021	249.869	8.29674	31	2991
119	284.703	249.806	8.34512	31	3012
120	285.402	249.733	8.19056	31	3036
121	285.559	249.46	8.27875	31	3059
122	286.14	249.323	8.32756	31	3085
123	286.012	249.324	8.44596	31	3114
124	284.962	249.455	8.34088	31	3137
125	284.904	249.324	8.03524	31	3159
126	284.561	249.538	8.35809	31	3180
127	285.022	249.1	8.37215	31	3198
128	285.56	248.808	8.47372	31	3216
129	285.717	248.801	8.39726	31	3233
130	285.046	248.825	8.48966	31	3255
131	284.32	248.959	8.50977	31	3276
132	284.04	248.811	8.49565	31	3296
133	284.465	248.641	8.38632	31	3319
134	284.937	248.383	8.3687	31	3344
135	285.278	248.192	8.49419	31	3368
136	285.145	247.947	8.63145	31	3393
137	284.602	248.304	8.61871	31	3420
138	284.006	248.598	8.7001	31	3445
139	283.458	248.175	9.01015	31	3474
140	284.475	248.287	8.83654	31	3499
141	284.617	248.432	8.88565	31	3525
142	285.75	248.516	8.74765	31	3550
143	285.362	248.349	9.03087	31	3583
144	284.582	248.719	8.99432	31	3606
145	284.199	249.149	9.09094	31	3629
146	284.388	248.871	9.16801	31	3650
147	284.419	249.02	9.13307	31	3676
148	285.145	248.881	9.19184	31	3698
149	285.54	248.661	9.38887	31	3719
150	285.309	249.014	9.25102	31	3737
151	284.699	249.328	9.32382	31	3757
152	284.166	250.138	9.18729	31	3776
153	284.496	249.868	9.40931	31	3794
154	285.115	249.675	9.34373	31	3813
155	286.229	249.247	9.37197	31	3831
156	286.597	249.103	9.42914	31	3848
157	286.084	249.414	9.40701	31	3868
158	285.272	250.134	9.2176	31	3888
159	284.855	250.074	9.37385	31	3912
160	285.132	249.776	9.41685	31	3936
161	285.892	249.438	9.36461	31	3957
162	286.514	248.807	9.47263	31	3977
163	286.573	248.799	9.38183	31	3992
164	285.858	249.129	9.36234	31	4009
165	284.989	249.557	9.43153	31	4025
166	284.801	249.574	9.41504	31	4042
167	285.604	248.941	9.42	31	4057
168	285.596	248.958	9.32722	31	4079
169	286.276	248.278	9.3669	31	4099
170	285.39	248.523	9.43868	31	4114
171	285.165	248.521	9.50225	31	4130
172	284.88	248.86	9.62118	31	4148
173	284.042	249.237	9.55387	31	4166
174	283.929	248.986	9.78506	31	4187
175	283.91	248.851	9.72776	31	4212
176	284.15	248.719	9.7722	31	4236
177	284.829	248.181	9.70863	31	4260
178	284.031	248.846	9.87746	31	4287
179	285.012	248.34	9.82968	31	4310
180	284.142	249.323	9.96565	31	4336
181	285.319	248.577	9.87902	31	4362
182	285.105	248.828	9.94695	31	4389
183	285.735	248.725	10.0507	31	4413
184	285.375	248.731	10.2113	31	4436
185	284.681	249.204	10.117	31	4455
186	284.336	249.651	10.2066	31	4472
187	284.097	249.978	9.94052	31	4490
188	285.021	249.668	10.0619	31	4510
189	285.841	249.291	10.1169	31	4533
190	285.514	249.55	10.2279	31	4554
191	285.66	249.692	10.3044	31	4575
192	284.929	250.219	10.3636	31	4600
193	284.504	250.652	10.3467	31	4625
194	284.905	250.39	10.1304	31	4648
195	286.08	249.674	10.4231	31	4675
196	286.394	249.704	10.2951	31	4701
197	285.628	250.041	10.2321	31	4724
198	285.549	250.095	10.2643	31	4749
199	284.594	250.336	10.3129	31	4774
200	284.464	250.501	10.2252	31	4799
201	284.717	250.099	10.2803	31	4824
202	285.424	249.352	10.3092	31	4852
203	286.032	248.919	10.2267	31	4876
204	285.554	248.702	10.4462	31	4898
205	284.542	249.423	10.2608	31	4923
206	284.119	249.615	10.462	31	4947
207	283.914	249.562	10.2544	31	4975
208	285.258	248.483	10.3169	31	5009
209	284.78	248.797	10.4889	31	5039
210	285.162	248.092	10.5362	31	5069
211	284.92	248.409	10.5531	31	5100
212	284.079	248.732	10.6128	31	5133
213	283.285	249.297	10.5789	31	5162
214	283.533	249.301	10.7595	31	5190
215	284.179	249.074	10.7062	31	5218
216	284.73	248.681	10.7742	31	5242
217	285.39	248.562	10.8449	31	5268
218	284.859	248.983	11.0804	31	5290
219	284.094	249.535	10.8029	31	5315
220	283.807	249.769	10.7814	31	5338
221	283.6	249.822	11.1636	31	5362
222	284.544	249.619	11.1457	31	5385
223	285.281	249.224	10.9929	31	5411
224	284.819	249.756	11.1867	31	5436
225	285.348	249.206	11.1577	31	5464
226	284.315	249.918	11.3591	31	5501
227	284.259	250.155	11.2766	31	5528
228	284.34	249.748	11.3375	31	5557
229	284.67	249.943	11.5034	31	5580
230	285.267	249.734	11.2426	31	5597
231	284.789	249.605	11.548	31	5632
232	284.39	249.176	11.542	31	5661
233	284.093	249.134	11.7098	31	5686
234	283.887	248.373	11.8533	31	5710
235	284.033	248.366	11.8188	31	5733
236	284.16	248.129	11.8409	31	5758
237	284.198	247.803	12.1678	31	5782
238	284.424	247.657	12.1777	31	5805
239	283.634	248.224	11.7432	31	5824
240	283.754	248.121	11.7663	31	5846
241	283.6	248.079	11.7197	31	5866
11	133.824	200.602	11.9312	32	201
12	134.314	199.183	12.5542	32	223
13	133.778	195.591	14.6702	32	246
11	25.9531	491.454	19.4581	33	208
12	25.9708	490.433	18.3144	33	231
13	25.4832	490.205	18.1708	33	253
12	39.8778	496.754	5.84673	34	216
13	38.3705	497.154	6.45842	34	240
14	35.9915	498.631	7.32112	34	262
15	63.0752	459.789	6.91479	34	282
16	62.1974	459.623	6.75129	34	301
17	62.9069	460.3	6.79212	34	321
18	63.5135	460.903	7.29989	34	345
19	63.7892	460.601	7.06693	34	367
20	63.4048	460.62	7.24529	34	396
21	64.9384	460.252	7.25157	34	424
22	63.4018	460.674	7.26048	34	454
12	225.938	337.954	20.6054	35	232
13	224.939	338.079	18.8856	35	254
14	220.21	342.854	22.5	35	274
14	189.316	500.171	13.2649	36	269
15	189.854	499.018	9.42119	36	284
16	194.386	496.932	8.16961	36	302
17	192.732	486.007	4.50267	36	319
18	192.304	489.48	5.81101	36	343
19	192.487	486.433	3.99495	36	366
20	193.176	486.746	5.31654	36	394
21	193.84	485.84	4.49253	36	423
22	193.705	486.253	4.75888	36	452
23	193.217	486.828	5.27885	36	477
24	229.145	498.823	12.04	36	512
15	219.536	82.6806	12.6043	37	288
16	217.569	84.2105	14.0693	37	307
17	214.574	97.4752	5.54321	37	314
18	215.562	100.691	3.43768	37	335
19	214.732	99.0102	4.82922	37	359
20	212.745	97.3554	6.99454	37	387
21	213.081	98.0366	6.61549	37	416
22	214.828	96.817	7.05167	37	444
23	215.253	96.0434	7.01441	37	470
24	218.98	88.6553	9.17393	37	495
25	219.939	86.0113	10.6718	37	520
26	205.656	92.6521	18.3301	37	555
27	200.307	90.1728	22.5	37	587
28	205.714	91.536	17.6294	37	606
29	208.967	113.549	14.2069	37	630
15	413.613	460.498	22.5	38	294
16	413.9	459.993	22.5	38	313
17	414.294	458.637	22.5	38	334
18	412.296	461.513	22.5	38	357
19	412.285	461.783	22.5	38	385
20	414.256	458.542	22.5	38	412
16	161.79	377.444	7.50018	39	300
17	178.481	385.556	12.5516	39	330
18	179.691	384.716	15.0328	39	354
19	185.718	391.046	11.7442	39	376
16	398.12	292.543	10.2057	40	306
17	393.315	293.118	10.6045	40	325
18	388.08	293.227	9.73726	40	349
19	386.394	294.593	8.07911	40	374
20	386.028	296.59	6.72404	40	400
21	385.969	299.002	5.68049	40	428
22	386.211	298.209	6.28661	40	460
23	386.408	297.938	6.25679	40	484
24	386.712	298.389	6.18647	40	505
25	386.767	298.76	5.96182	40	532
26	386.746	300.144	5.8135	40	551
27	386.814	300.22	5.91922	40	576
28	386.946	300.312	6.16998	40	601
29	387.349	300.387	5.85234	40	624
30	387.767	299.583	6.50748	40	652
31	387.938	299.254	6.5442	40	676
32	388.148	298.491	7.07441	40	700
33	387.437	298.857	6.50976	40	731
34	387.143	299.495	6.61991	40	756
35	386.58	299.564	6.63746	40	779
36	386.94	299.423	6.71745	40	801
37	386.839	298.157	7.08918	40	826
38	386.554	296.494	7.74782	40	850
39	386.44	295.639	8.0143	40	879
40	384.685	294.86	8.83538	40	909
41	384.529	295.671	9.90422	40	939
42	384.423	295.632	10.3695	40	969
43	383.718	296.234	9.87529	40	993
44	383.313	297.033	10.7731	40	1018
45	382.997	299.567	12.4348	40	1052
46	383.511	303.076	13.39	40	1073
47	385.246	306.546	13.4099	40	1100
48	386.472	307.468	13.2948	40	1130
49	388.44	307.929	12.5321	40	1156
50	393.92	311	10.9059	40	1168
51	394.181	311.615	10.8144	40	1189
52	393.573	316.176	9.39094	40	1214
53	393.778	321.305	7.72602	40	1236
54	393.43	322.617	7.34509	40	1260
55	392.039	324.665	7.45447	40	1284
56	391.643	327.312	7.69442	40	1305
57	391.638	330.448	7.21888	40	1328
58	391.67	336.924	6.54238	40	1350
59	394.479	343.11	7.20435	40	1376
60	408.401	351.119	8.49028	40	1403
61	408.131	351.483	8.89196	40	1432
62	409.178	357.329	9.91144	40	1459
63	407.201	358.681	9.91542	40	1487
64	405.964	359.059	9.7261	40	1516
65	405.764	362.159	8.64156	40	1540
66	429.268	372.117	8.57715	40	1565
67	428.162	372.599	8.22529	40	1591
68	427.622	373.189	8.08117	40	1616
69	429.153	373.554	8.61718	40	1640
70	429.761	375.28	9.1293	40	1666
71	433.383	385.457	8.60309	40	1693
72	433.166	385.534	8.49116	40	1717
73	433.883	385.782	8.5601	40	1749
74	433.827	386.806	8.29261	40	1776
75	434.065	385.568	8.38645	40	1807
76	433.45	385.555	8.50528	40	1835
77	433.272	385.715	8.51885	40	1864
78	434.008	385.756	8.41312	40	1890
79	434.563	383.93	8.7218	40	1920
80	434.572	381.954	8.50351	40	1948
81	433.424	382.371	8.28072	40	1973
82	432.655	382.908	8.22945	40	2000
83	432.004	382.466	8.33764	40	2028
84	431.362	381.412	8.10913	40	2059
85	431.739	380.664	8.17708	40	2091
86	431.858	378.906	8.00609	40	2121
87	431.952	377.955	8.03275	40	2144
88	430.688	379.444	8.08294	40	2171
89	430.422	379.067	8.06165	40	2195
90	430.327	380.085	8.29814	40	2219
91	430.286	379.758	8.28515	40	2243
92	429.204	376.631	8.16641	40	2269
93	429.711	374.243	8.26658	40	2299
94	429.451	373.162	8.83	40	2327
95	428.342	375.573	8.16351	40	2356
96	427.45	374.818	8.42912	40	2387
97	427.709	375.967	8.43136	40	2414
98	428.425	376.26	8.57837	40	2442
99	429.254	375.358	8.38382	40	2470
100	430.072	374.951	8.44843	40	2499
101	429.707	375.875	8.6977	40	2528
102	428.968	377.733	8.76549	40	2560
103	428.535	376.449	8.9144	40	2590
104	428.362	376.569	9.00082	40	2620
105	428.994	376.919	9.07611	40	2657
106	429.643	376.504	9.14338	40	2687
107	430.29	375.491	8.94988	40	2714
108	430.299	376.532	8.63062	40	2739
109	430.14	378.177	9.00882	40	2765
110	433.16	383.684	9.8665	40	2793
111	431.87	382.985	9.72022	40	2819
112	430.251	379.306	9.412	40	2845
113	431.797	378.874	9.16007	40	2870
114	434.656	383.765	9.907	40	2895
115	434.031	383.786	9.8178	40	2926
116	433.265	383.964	9.97775	40	2950
117	433.216	384.988	9.91585	40	2975
118	433.493	385.342	10.0298	40	2999
119	434.009	385.13	9.79478	40	3020
120	434.807	383.729	9.90944	40	3044
121	435.292	384.763	9.72574	40	3068
122	434.581	385.466	9.6588	40	3096
123	433.979	384.45	9.83943	40	3122
124	433.661	386.512	9.94645	40	3143
125	433.615	384.708	9.91265	40	3165
126	434.381	384.572	10.0125	40	3186
127	435.128	383.505	9.98759	40	3204
128	434.536	382.668	9.78729	40	3222
129	433.387	383.055	9.85627	40	3240
130	432.757	383.578	9.85336	40	3261
131	432.427	383.542	10.0683	40	3282
132	433.035	383.247	10.2538	40	3304
133	433.587	381.99	9.90645	40	3328
134	432.669	378.939	9.63297	40	3352
135	433.761	382.51	9.95948	40	3378
136	433.056	384.206	10.0457	40	3402
137	432.314	383.893	10.2918	40	3429
138	432.943	385.849	10.3652	40	3455
139	433.172	384.025	10.3029	40	3482
140	434.231	382.377	10.3184	40	3507
141	434.189	382.234	10.3554	40	3534
142	434.365	384.613	10.1554	40	3561
143	433.389	385.085	10.3676	40	3588
144	433.081	386.001	10.4363	40	3611
145	432.9	384.845	10.748	40	3634
146	434.043	383.947	10.7031	40	3655
147	434.324	384.049	10.6326	40	3680
148	434.569	383.763	10.3428	40	3702
149	433.719	383.635	10.6061	40	3722
150	432.719	384.427	10.6028	40	3740
151	433.199	385.906	10.759	40	3760
152	434.171	386.586	10.9719	40	3779
153	434.695	385.019	11.0718	40	3798
154	435.252	383.927	10.6569	40	3816
155	431.521	376.907	10.406	40	3835
156	431.708	380.32	10.3723	40	3852
157	433.298	385.444	10.9606	40	3873
158	433.483	386.144	11.0851	40	3894
159	434.325	385.482	10.9259	40	3917
160	435.239	385.057	10.9342	40	3940
161	435.495	383.175	10.7231	40	3960
162	435.165	384.694	10.6932	40	3980
163	434.185	385.229	10.6368	40	3995
164	433.983	386.744	10.8877	40	4013
165	434.074	386.731	10.8533	40	4028
166	435.259	385.094	10.684	40	4046
167	435.201	382.805	10.753	40	4064
168	435.128	382.996	10.6604	40	4083
169	434.153	385.058	10.9618	40	4103
170	433.466	386.571	10.7884	40	4118
171	433.332	385.599	11.4055	40	4140
172	433.623	385.911	10.687	40	4152
173	433.967	385.609	10.9005	40	4169
174	433.411	384.935	11.4884	40	4205
175	434.61	384.446	10.9453	40	4217
176	434.263	384.511	11.4009	40	4254
177	434.771	384.662	11.0177	40	4264
178	433.453	385.78	11.6961	40	4302
179	434.708	382.822	11.4632	40	4329
180	433.809	385.458	11.7112	40	4353
181	434.975	383.531	11.572	40	4378
182	434.945	382.556	11.5866	40	4403
183	433.95	385.206	11.6813	40	4425
184	433.758	387.225	11.4867	40	4446
185	433.824	388.42	11.4365	40	4467
186	434.307	383.147	11.7305	40	4485
187	434.655	385.126	11.4395	40	4503
188	436.421	387.071	11.4507	40	4522
190	433.685	387.087	11.9993	40	4564
191	433.095	384.826	12.1195	40	4589
192	433.753	387.05	12.0019	40	4611
193	434.784	387.353	12.0701	40	4637
194	435.536	386.024	11.9546	40	4660
195	436.185	383.974	11.7842	40	4684
196	435.003	385.487	11.8157	40	4710
197	433.803	387.43	12.0387	40	4736
198	433.823	387.514	11.9516	40	4762
199	433.857	386.289	11.9571	40	4788
200	434.656	387.546	11.8802	40	4813
201	435.068	384.849	11.7433	40	4838
202	435.59	384.504	11.7113	40	4864
203	435.313	386.906	11.6148	40	4889
204	434.183	387.51	11.8041	40	4914
205	433.749	387.244	11.6488	40	4936
206	433.642	386.638	11.6505	40	4962
207	434.153	384.499	11.97	40	4992
208	434.518	382.624	11.9538	40	5025
209	434.911	382.439	11.9183	40	5054
210	433.84	382.125	12.0799	40	5082
211	432.87	384.213	12.3356	40	5113
212	433.323	387.88	12.0313	40	5147
213	433.573	386.389	12.2417	40	5177
214	433.996	384.223	12.1791	40	5205
216	434.389	382.832	12.3145	40	5255
217	433.546	384.761	12.2465	40	5279
218	432.984	385.451	12.423	40	5304
219	432.912	386.883	12.6234	40	5329
220	434.622	384.539	12.3217	40	5352
221	434.6	384.741	12.4316	40	5378
222	435.083	383.254	12.45	40	5399
223	434.558	384.154	12.5445	40	5425
224	433.593	387.799	12.4637	40	5449
225	434.556	384.396	12.4991	40	5479
226	433.878	386.848	12.6088	40	5508
227	434.334	386.511	12.7161	40	5536
229	434.689	385.975	12.7057	40	5586
231	434.617	386.338	12.5012	40	5638
232	434.394	387.396	12.4543	40	5665
17	234.272	326.821	12.0229	41	329
18	235.385	325.042	17.0263	41	355
19	234.993	328.263	20.3062	41	378
20	231.37	332.758	19.6491	41	409
21	226.017	338.332	18.8011	41	437
22	224.852	340.143	15.5414	41	464
23	222.199	341.791	12.5371	41	487
17	337.673	256.014	11.6535	42	332
18	331.669	253.785	13.0494	42	351
19	328.278	252.305	7.79264	42	365
20	328.244	251.916	12.0365	42	404
21	328.254	251.033	12.5186	42	432
22	324.238	247.558	11.0306	42	451
23	323.734	247.47	10.894	42	476
24	322.746	247.831	10.7076	42	500
25	319.192	247.919	9.69083	42	526
26	319.019	248.006	9.41686	42	547
27	318.71	247.497	9.51265	42	572
28	318.622	245.862	9.63844	42	598
29	317.075	241.961	10.8006	42	621
30	317.109	241.66	10.7157	42	646
31	316.852	242.018	11.1322	42	669
32	316.833	242.304	10.7746	42	691
33	316.905	242.208	11.0337	42	724
34	317.215	242.108	10.9203	42	748
35	317.707	241.885	10.7122	42	771
36	317.451	241.786	11.2332	42	795
37	317.565	241.697	10.716	42	817
38	317.149	242.037	10.8868	42	843
39	317.135	241.818	10.9744	42	871
40	317.126	241.727	10.6826	42	901
41	317.446	241.392	10.8714	42	930
42	317.46	241.402	10.66	42	960
43	317.247	241.205	10.7664	42	986
44	317.081	241.168	10.9882	42	1011
45	316.503	241.375	11.1607	42	1034
46	316.164	241.194	11.3525	42	1069
47	316.456	241.178	11.231	42	1083
48	315.749	241.051	12.0088	42	1124
49	314.153	240.576	14.357	42	1151
50	304.332	244.454	19.2263	42	1175
[truncated: 3,854 more rows]
