# Supplementary material for: Functional visualization of NK cell-mediated killing of metastatic single tumor cells
Source: eLife journal article supplement (doi:10.7554/elife.76269), 2022-02-03
Supplement: supp [file nk_neg_2.xlsx]

## Sheet: Sheet1
1	226.335	44.2388	2.5	1	0
2	227.303	43.4489	2.5	1	34
3	226.954	43.7306	2.5	1	69
4	227.51	43.1203	2.5	1	103
5	227	43.8467	2.5	1	139
6	226.158	44.3223	2.5	1	172
7	223.877	47.1344	2.5	1	204
8	220.537	49.677	2.5	1	235
9	220.292	49.3704	2.5	1	266
10	220.598	49.1265	2.5	1	302
11	223.258	46.4098	2.5	1	340
12	223.206	46.5252	2.5	1	378
13	223.283	46.5904	2.5	1	416
14	222.305	47.4661	2.5	1	454
15	226.172	43.3886	2.5	1	492
16	232.599	40.5912	4.96716	1	533
18	235.134	49.366	9.40157	1	613
19	235.378	49.5822	9.33495	1	655
1	242.231	146.171	2.5	2	1
2	242.001	145.891	2.5	2	35
3	242.074	146.671	2.5	2	70
4	242.485	147.261	2.5	2	104
1	466.569	60.9353	2.5	3	2
2	466.961	60.783	2.5	3	37
3	468.22	60.867	2.5	3	73
4	467.87	60.7679	2.5	3	108
5	468.328	60.9484	2.5	3	142
6	469.723	61.5758	2.5	3	174
7	468.303	60.9468	2.5	3	207
8	466.431	60.5753	2.5	3	237
9	465.31	60.2289	2.5	3	270
10	465.228	60.358	2.5	3	306
11	468.563	60.863	2.5	3	343
12	471.362	62.2754	2.5	3	381
13	471.525	64.5062	2.5	3	420
1	396.058	124.176	2.5	4	3
2	395.278	124.686	2.5	4	38
3	394.539	125.188	2.5	4	74
4	394.452	125.156	2.5	4	109
5	395.07	124.975	2.5	4	144
6	395.63	124.228	2.5	4	176
7	395.816	123.023	2.5	4	209
8	395.322	122.393	2.5	4	239
9	395.571	122.423	2.5	4	273
10	394.505	125.395	2.5	4	309
11	394.502	124.651	2.5	4	346
12	394.285	124.992	2.5	4	384
13	394.62	124.817	2.5	4	422
14	394.995	123.862	2.5	4	458
15	395.063	123.348	2.5	4	497
16	395.364	122.974	2.5	4	538
17	394.681	122.097	2.5	4	575
18	394.022	123.775	2.5	4	616
19	394.323	124.231	2.5	4	659
20	394.708	124.697	2.5	4	700
21	394.749	124.814	2.5	4	739
22	394.773	124.821	2.5	4	777
23	394.41	124.363	2.5	4	816
24	393.992	123.692	2.5	4	852
25	393.763	123.746	2.5	4	886
26	394.088	124.957	2.5	4	921
27	394.647	125.031	2.5	4	953
28	395.235	124.864	2.5	4	985
29	394.45	124.954	2.5	4	1018
30	394.142	124.508	2.5	4	1050
31	394.376	123.888	2.5	4	1083
32	395.382	123.743	2.5	4	1117
33	395.048	124.763	2.5	4	1151
34	394.672	125.279	2.5	4	1187
35	395.054	124.664	2.5	4	1221
36	394.928	124.321	2.5	4	1255
37	394.986	124.006	2.5	4	1291
38	394.286	122.995	2.5	4	1324
39	395.024	122.635	2.5	4	1357
40	394.783	123.154	2.5	4	1390
41	395.253	124.277	2.5	4	1421
42	394.996	125.085	2.5	4	1455
43	394.59	125.164	2.5	4	1486
44	393.352	123.647	2.5	4	1517
45	393.97	122.713	2.5	4	1548
46	395.068	121.804	2.5	4	1580
47	395.456	122.309	2.5	4	1613
48	394.898	123.881	2.5	4	1646
49	394.817	124.905	2.5	4	1677
50	394.427	125.134	2.5	4	1706
51	394.636	124.268	2.5	4	1735
52	394.857	123.859	2.5	4	1765
53	395.235	122.866	2.5	4	1794
54	395.046	123.275	2.5	4	1824
55	394.346	123.056	2.5	4	1854
56	394.093	123.781	2.5	4	1883
57	393.731	124.407	2.5	4	1914
58	393.599	124.022	2.5	4	1946
59	394.198	123.761	2.5	4	1977
60	394.634	122.098	2.5	4	2008
61	394.647	122.01	2.5	4	2036
62	394.09	123.709	2.5	4	2064
63	393.551	124.788	2.5	4	2091
64	393.493	124.784	2.5	4	2118
65	393.931	124.889	2.5	4	2147
66	394.509	123.793	2.5	4	2176
67	394.271	123.881	2.5	4	2203
68	393.967	122.472	2.5	4	2231
69	393.53	121.84	2.5	4	2258
70	393.785	122.723	2.5	4	2283
71	393.675	124.439	2.5	4	2309
72	393.812	125.342	2.5	4	2334
73	393.471	125.026	2.5	4	2357
74	394.363	124.222	2.5	4	2380
75	393.48	123.998	2.5	4	2404
76	393.541	123.752	2.5	4	2427
77	394.313	123.575	2.5	4	2448
78	394.285	125.086	2.5	4	2469
79	393.926	125.298	2.5	4	2490
80	394.035	124.404	2.5	4	2510
81	394.267	122.537	2.5	4	2530
82	394.038	123.636	2.5	4	2551
83	393.719	125.621	2.5	4	2572
84	393.622	125.261	2.5	4	2593
85	394.496	124.372	2.5	4	2614
86	394.933	122.963	2.5	4	2635
87	394.508	122.653	2.5	4	2655
88	394.038	122.125	2.5	4	2676
89	393.779	122.838	2.5	4	2699
90	394.547	124.097	2.5	4	2720
91	394.394	125.408	2.5	4	2740
92	393.756	125.69	2.5	4	2761
93	394.174	124.549	2.5	4	2784
94	394.216	122.59	2.5	4	2808
95	394.361	121.469	2.5	4	2832
96	393.628	121.524	2.5	4	2856
97	394.558	123.974	2.5	4	2881
98	394.042	125.358	2.5	4	2906
99	394.214	125.315	2.5	4	2932
100	394.173	123.907	2.5	4	2960
101	394.492	121.678	2.5	4	2987
102	393.907	121.877	2.5	4	3015
103	394.109	122.451	2.5	4	3042
104	393.566	124.809	2.5	4	3072
105	393.198	125.429	2.5	4	3099
106	393.953	124.414	2.5	4	3128
107	393.777	125.322	2.5	4	3152
108	393.893	124.396	2.5	4	3178
109	393.902	123.965	2.5	4	3205
110	394.434	123.751	2.5	4	3234
111	393.869	125.194	2.5	4	3261
112	393.914	126.177	2.5	4	3288
113	393.41	126.304	2.5	4	3318
114	392.97	125.824	2.5	4	3347
115	393.922	125.361	2.5	4	3377
116	394.276	123.066	2.5	4	3405
117	394.343	123.73	2.5	4	3434
118	393.901	122.9	2.5	4	3462
119	393.598	123.416	2.5	4	3489
120	393.641	125.952	2.5	4	3515
121	393.85	126.143	2.5	4	3543
122	393.726	126.194	2.5	4	3571
123	393.952	126.207	2.5	4	3601
124	395.229	124.48	2.5	4	3626
125	395.038	124.246	2.5	4	3650
126	394.794	122.898	2.5	4	3671
127	394.49	122.638	2.5	4	3692
128	394.647	123.807	2.5	4	3711
129	394.246	126.61	2.5	4	3729
130	393.604	127.753	2.5	4	3751
131	392.862	127.046	2.5	4	3773
132	392.796	126.44	2.5	4	3792
133	393.371	124.231	2.5	4	3815
134	393.945	123.452	2.5	4	3840
135	395.006	124.635	2.5	4	3864
136	393.824	127.111	2.5	4	3887
137	393.183	126.827	2.5	4	3910
138	393.277	125.663	2.5	4	3933
139	393.334	125.565	2.5	4	3954
140	394.217	125.589	2.5	4	3976
141	394.419	125.641	2.5	4	4000
142	393.131	126.48	2.5	4	4024
143	392.496	126.189	2.5	4	4049
144	392.118	123.753	2.5	4	4071
145	392.444	122.901	2.5	4	4093
146	394.024	124.923	2.5	4	4116
147	394.343	125.616	2.5	4	4136
148	393.299	126.96	2.5	4	4158
149	391.838	126.38	2.5	4	4177
150	392.189	125.529	2.5	4	4197
151	392.741	124.17	2.5	4	4216
152	393.838	123.314	2.5	4	4235
153	394.628	122.854	2.5	4	4254
154	394.852	123.431	2.5	4	4273
155	393.422	127.381	2.5	4	4292
156	392.529	127.501	2.5	4	4312
157	392.392	126.937	2.5	4	4331
158	392.595	126.917	2.5	4	4350
159	394.602	125.567	2.5	4	4368
160	395.542	124.931	2.5	4	4387
161	394.837	124.714	2.5	4	4404
162	393.091	127.241	2.5	4	4420
163	392.691	127.766	2.5	4	4437
164	392.415	127.474	2.5	4	4451
165	393.774	127.486	2.5	4	4465
166	394.622	125.095	2.5	4	4481
167	394.529	123.159	2.5	4	4494
168	394.162	123.172	2.5	4	4509
169	393.425	125.109	2.5	4	4522
170	393.535	126.755	2.5	4	4538
171	393.706	127.363	2.5	4	4552
172	393.854	128.076	2.5	4	4566
173	394.556	126.183	2.5	4	4580
174	394.449	123.917	2.5	4	4595
175	395.055	122.26	2.5	4	4609
176	394.969	123.398	2.5	4	4623
177	394.668	125.696	2.5	4	4639
178	393.386	127.556	2.5	4	4655
179	392.864	127.584	2.5	4	4671
180	392.592	127.678	2.5	4	4686
181	393.117	126.224	2.5	4	4702
182	393.989	122.612	2.5	4	4718
183	394.132	121.816	2.5	4	4734
184	394.334	124.036	2.5	4	4752
185	393.065	127.584	2.5	4	4771
186	392.391	127.003	2.5	4	4789
187	391.637	126.841	2.5	4	4808
188	391.63	126.485	2.5	4	4825
189	392.913	126.296	2.5	4	4842
190	394.516	124.56	2.5	4	4859
191	393.788	124.592	2.5	4	4877
192	393.101	125.01	2.5	4	4894
193	392.215	125.831	2.5	4	4913
194	392.625	126.533	2.5	4	4932
195	392.192	126.839	2.5	4	4949
196	393.904	126.701	2.5	4	4966
197	393.85	124.486	2.5	4	4981
198	394.119	124.205	2.5	4	4998
199	393.376	123.11	2.5	4	5016
200	393.735	124.802	2.5	4	5033
201	393.558	127.353	2.5	4	5053
202	392.732	128.374	2.5	4	5073
203	392.886	127.708	2.5	4	5092
204	392.665	126.403	2.5	4	5110
205	393.631	125.05	2.5	4	5128
206	394.379	124.111	2.5	4	5148
207	394.709	123.175	2.5	4	5169
208	393.99	125.758	2.5	4	5189
209	393.326	127.157	2.5	4	5211
210	392.737	127.584	2.5	4	5233
211	393.163	127.829	2.5	4	5256
212	393.828	127.275	2.5	4	5278
213	394.412	125.23	2.5	4	5299
214	394.396	123.726	2.5	4	5322
215	393.731	123.384	2.5	4	5346
216	393.246	124.714	2.5	4	5370
217	393.262	126.849	2.5	4	5394
218	394.053	126.551	2.5	4	5419
219	393.598	127.465	2.5	4	5442
220	393.019	127.942	2.5	4	5465
221	393.461	126.814	2.5	4	5491
222	393.887	125.095	2.5	4	5514
223	393.413	123.879	2.5	4	5534
224	393.914	123.143	2.5	4	5556
225	393.661	124.6	2.5	4	5580
227	392.652	127.999	2.5	4	5623
228	391.648	128.021	2.5	4	5646
229	392.673	126.009	2.5	4	5669
230	393.75	123.547	2.5	4	5691
1	431.632	137.987	2.5	5	4
2	430.34	137.334	4.00972	5	40
3	430.488	136.656	2.5	5	75
4	430.445	137.194	4.44774	5	111
5	430.324	136.944	4.45114	5	146
6	430.663	136.958	4.64667	5	178
7	429.858	135.893	4.75974	5	211
8	429.69	136.615	5.00916	5	240
9	429.074	136.493	4.41433	5	274
10	429.111	136.107	4.23804	5	311
11	429.49	136.326	4.38055	5	348
12	428.915	134.572	5.12175	5	386
13	429.491	134.631	5.47791	5	425
14	428.254	133.592	5.59388	5	460
15	428.46	134.283	5.46305	5	499
16	427.876	134.41	5.18665	5	539
17	427.658	133.779	5.7254	5	577
18	427.67	133.325	5.9936	5	618
19	427.108	131.593	5.5337	5	662
20	428.332	132.342	5.49025	5	703
21	427.458	132.764	5.38302	5	743
22	427.268	132.674	4.99147	5	780
23	427.023	132.694	4.83014	5	819
24	427.279	132.717	5.32884	5	855
25	427.386	133.138	5.80171	5	891
26	428.072	133.105	5.72057	5	925
27	427.905	132.865	5.59916	5	957
28	427.629	132.989	5.43641	5	988
29	427.097	133.3	5.5578	5	1020
30	427.313	133.385	5.57724	5	1054
31	427.624	133.228	6.07717	5	1086
32	427.775	132.614	5.76653	5	1120
33	428.64	133.146	5.53229	5	1153
34	427.633	132.835	5.44119	5	1189
35	427.499	133.279	5.20265	5	1223
36	427.087	133.554	5.28449	5	1257
37	427.366	133.372	5.27	5	1293
38	427.637	133.234	5.71754	5	1326
39	427.947	133.02	5.53687	5	1359
40	427.752	132.656	5.43511	5	1392
41	426.872	132.176	5.46685	5	1423
42	426.89	132.579	5.36749	5	1457
43	426.543	129.048	6.32839	5	1488
44	425.085	129.713	6.29368	5	1519
45	425.977	129.936	6.68202	5	1551
46	426.823	128.539	6.95628	5	1583
47	427.712	126.986	7.33034	5	1616
48	428.691	125.547	6.376	5	1649
49	426.603	127.425	6.12366	5	1680
50	427.486	125.185	6.90967	5	1709
51	426.3	126.781	6.57772	5	1738
52	427.082	125.672	6.32125	5	1768
53	427.018	126.04	7.00308	5	1797
54	428.724	122.147	7.25701	5	1826
55	430.159	120.209	6.9173	5	1856
56	428.426	120.854	6.76191	5	1885
57	432.119	117.831	8.66914	5	1916
58	425.631	126.911	6.89664	5	1948
59	426.809	127.306	5.49416	5	1979
60	426.06	128.218	7.26289	5	2010
61	427.904	124.358	6.27034	5	2039
62	427.047	126.694	6.29583	5	2067
63	425.673	128.015	6.41913	5	2094
64	425.378	128.936	6.7432	5	2119
65	425.399	129.369	6.9783	5	2148
66	426.679	127.44	6.02558	5	2177
67	426.449	127.651	7.35542	5	2205
68	426.704	127.686	6.06259	5	2233
69	426.283	128.154	6.35508	5	2260
70	425.122	130.151	6.50989	5	2285
71	424.315	131.384	6.46492	5	2311
72	424.696	130.754	7.15417	5	2336
73	424.85	130.685	7.4356	5	2359
74	426.675	128.431	6.27693	5	2382
75	427.377	127.826	6.9784	5	2406
76	427.547	127.907	6.37031	5	2429
77	425.117	131.441	6.27147	5	2450
78	427.729	127.311	5.74569	5	2471
79	425.724	130.838	7.06209	5	2492
80	428.033	126.902	6.9885	5	2512
81	424.714	131.678	6.63214	5	2532
82	425.82	130.062	6.35199	5	2553
83	427.58	126.319	6.00508	5	2573
84	428.673	124.723	6.71875	5	2595
85	426.112	128.211	6.83289	5	2616
86	424.344	131.32	7.08952	5	2637
87	424.89	131.329	6.57175	5	2657
88	426.202	129.443	6.18785	5	2678
89	427.295	127.433	6.57533	5	2701
90	428.698	127.281	7.07951	5	2722
91	426.367	128.03	7.02424	5	2742
92	425.535	128.945	6.91077	5	2763
93	423.546	131.12	7.05723	5	2786
94	425.187	130.932	6.58224	5	2810
95	425.905	129.457	6.54202	5	2834
96	427.651	126.285	6.64461	5	2858
97	427.346	126.292	6.91603	5	2883
98	425.998	128.042	7.13679	5	2908
99	424.365	130.672	7.33164	5	2934
100	423.721	131.233	7.10981	5	2962
101	424.918	130.878	6.89598	5	2989
102	426.24	127.93	6.9035	5	3017
103	424.307	130.49	7.17525	5	3044
104	423.854	131.557	7.09062	5	3074
105	424.655	130.805	6.74948	5	3101
106	426.85	127.553	6.84758	5	3129
107	428.345	127.157	7.89455	5	3153
108	426.06	126.924	7.30301	5	3179
109	425.316	128.594	7.6335	5	3206
110	424.462	131.664	7.11331	5	3236
111	425.621	129.458	7.08213	5	3263
112	426.14	127.742	7.19865	5	3290
113	426.009	126.294	7.86047	5	3320
114	424.197	130.696	7.72712	5	3349
115	425.083	130.194	7.15813	5	3379
116	426.558	128.499	6.84816	5	3407
117	426.595	129.163	7.13823	5	3436
118	424.766	130.771	7.17853	5	3464
119	424.53	131.557	7.39095	5	3491
120	425.237	129.84	6.90831	5	3519
121	425.624	130.215	6.60741	5	3547
122	426.879	128.867	6.82192	5	3574
123	428.162	127.513	7.43594	5	3603
1	384.551	53.6364	4.08855	6	5
2	384.352	54.0743	4.31245	6	39
3	382.276	54.2177	2.5	6	72
4	381.133	55.7426	2.5	6	107
5	380.783	56.3172	2.5	6	141
6	380.825	56.7676	2.5	6	173
7	380.847	56.0961	2.5	6	206
8	380.697	56.5075	2.5	6	236
9	380.553	55.9614	2.5	6	269
10	380.044	55.8025	2.5	6	305
11	379.695	55.8571	2.5	6	342
12	380.095	56.9135	2.5	6	380
13	380.214	57.7891	2.5	6	419
14	380.133	56.8162	2.5	6	456
15	379.674	56.0884	2.5	6	495
16	376.143	52.054	2.5	6	536
17	375.71	52.2914	2.5	6	573
18	374.719	52.2525	2.5	6	614
19	374.049	52.7579	2.5	6	657
20	371.615	56.1503	2.5	6	698
21	369.952	59.2297	2.5	6	737
22	370	59.3606	2.5	6	775
23	370.021	59.6873	2.5	6	814
24	369.874	59.8805	2.5	6	849
25	369.838	59.8593	2.5	6	883
26	369.608	60.7638	2.5	6	918
27	369.561	61.1453	2.5	6	950
28	369.812	60.9538	2.5	6	982
29	369.597	61.951	2.5	6	1015
30	369.598	61.8379	2.5	6	1047
31	369.603	61.9414	2.5	6	1081
32	369.649	61.5074	2.5	6	1115
33	370.131	60.9961	2.5	6	1149
34	370.305	60.4117	2.5	6	1185
35	370.399	60.1863	2.5	6	1219
36	370.454	60.1425	2.5	6	1253
37	370.52	60.0769	2.5	6	1289
38	370.533	60.0271	2.5	6	1322
39	370.45	59.8161	2.5	6	1355
40	370.441	59.5294	2.5	6	1388
41	370.583	59.848	2.5	6	1419
42	370.341	60.2576	2.5	6	1453
43	370.177	60.2381	2.5	6	1484
44	370.373	59.8482	2.5	6	1515
45	370.385	59.5524	2.5	6	1546
46	370.059	60.1567	2.5	6	1578
47	370.221	60.0535	2.5	6	1611
48	369.969	60.4324	2.5	6	1644
49	369.894	60.603	2.5	6	1675
50	369.878	60.2549	2.5	6	1704
51	370.199	60.0234	2.5	6	1733
52	369.89	60.0393	2.5	6	1763
53	369.943	59.6235	2.5	6	1792
54	369.83	59.8907	2.5	6	1822
55	369.837	60.0182	2.5	6	1852
56	369.862	59.581	2.5	6	1881
57	369.709	60.0389	2.5	6	1912
58	369.547	59.6837	2.5	6	1944
59	369.466	59.7322	2.5	6	1975
60	369.405	59.9028	2.5	6	2006
61	369.53	60.0624	2.5	6	2035
62	369.576	59.7783	2.5	6	2063
63	369.451	60.0307	2.5	6	2090
64	369.297	60.2152	2.5	6	2116
65	369.21	60.9476	2.5	6	2145
66	369.279	60.4374	2.5	6	2174
67	369.213	60.7884	2.5	6	2202
68	369.248	60.9387	2.5	6	2230
69	369.421	60.3904	2.5	6	2257
70	369.381	60.6607	2.5	6	2282
71	369.475	60.8725	2.5	6	2308
72	369.389	61.0607	2.5	6	2333
73	369.28	61.133	2.5	6	2356
74	369.257	61.5546	2.5	6	2379
75	369.205	62.1923	2.5	6	2403
76	369.372	61.7614	2.5	6	2426
77	369.564	61.2937	2.5	6	2447
78	369.707	60.7694	2.5	6	2468
79	369.583	61.3233	2.5	6	2489
80	369.417	61.8862	2.5	6	2509
81	369.716	61.2979	2.5	6	2529
82	369.64	61.1564	2.5	6	2550
83	369.84	60.952	2.5	6	2571
84	369.587	61.1852	2.5	6	2592
85	369.599	61.1473	2.5	6	2613
86	369.562	61.1602	2.5	6	2634
87	369.46	61.3812	2.5	6	2654
88	369.49	61.6521	2.5	6	2675
89	369.395	61.7473	2.5	6	2698
90	369.193	62.2533	2.5	6	2719
91	369.202	61.9572	2.5	6	2739
92	369.189	61.6413	2.5	6	2760
93	369.326	61.3956	2.5	6	2783
94	369.292	61.2064	2.5	6	2807
95	369.429	60.9983	2.5	6	2831
96	369.221	61.0988	2.5	6	2855
97	369.001	61.2653	2.5	6	2880
98	368.897	61.2175	2.5	6	2905
99	369.006	61.3074	2.5	6	2931
100	368.949	61.7015	2.5	6	2959
101	368.962	61.6819	2.5	6	2986
102	368.876	61.1965	2.5	6	3014
103	368.904	61.1509	2.5	6	3041
104	368.891	60.8272	2.5	6	3071
105	369.045	61.0382	2.5	6	3098
106	368.788	61.5136	2.5	6	3127
107	368.801	60.9944	2.5	6	3151
108	368.469	61.7448	2.5	6	3177
109	368.826	61.5573	2.5	6	3204
110	368.863	61.3978	2.5	6	3233
111	368.854	61.6631	2.5	6	3260
112	368.521	62.2413	2.5	6	3287
113	368.712	62.3237	2.5	6	3317
114	369.014	62.0003	2.5	6	3346
115	368.851	61.8028	2.5	6	3376
116	368.939	61.9877	2.5	6	3404
117	368.989	62.0961	2.5	6	3433
118	369.109	62.0752	2.5	6	3461
119	369.233	61.8607	2.5	6	3488
120	369.152	61.858	2.5	6	3514
121	369.366	61.6471	2.5	6	3542
122	369.184	61.9043	2.5	6	3570
123	369.189	62.2381	2.5	6	3600
124	369.132	62.292	2.5	6	3625
125	368.467	68.8521	2.5	6	3649
126	368.607	68.8695	2.5	6	3670
127	368.647	69.0532	2.5	6	3691
128	368.559	68.6317	2.5	6	3710
129	368.513	68.8551	2.5	6	3728
130	368.268	68.6521	2.5	6	3750
131	367.924	70.3758	2.5	6	3772
132	367.594	71.0904	4.15547	6	3793
133	367.751	71.0054	4.44715	6	3816
134	367.464	70.8747	4.61804	6	3841
135	367.513	70.6222	2.5	6	3862
136	367.494	70.7737	4.39219	6	3888
137	367.318	70.345	4.55119	6	3911
138	367.352	70.1442	4.34467	6	3934
139	367.163	70.6141	4.15998	6	3955
140	367.065	70.7044	4.01844	6	3977
141	366.874	70.719	4.3553	6	4001
142	366.911	69.9966	4.43266	6	4025
143	366.798	69.59	4.01896	6	4050
144	366.96	70.347	4.31121	6	4072
145	366.909	70.2614	4.12827	6	4094
147	369.263	80.444	9.77227	6	4142
148	366.812	69.2415	4.76544	6	4159
149	378.304	56.7244	6.3381	6	4180
150	378.155	56.8482	6.04806	6	4198
151	378.423	57.9489	5.72325	6	4217
152	378.5	59.0027	5.3905	6	4236
153	378.882	61.0824	4.57366	6	4255
154	379.101	60.6474	5.38002	6	4274
155	379.454	61.213	5.29228	6	4293
156	379.505	61.3693	5.05889	6	4314
157	379.529	62.0002	5.0001	6	4333
158	379.174	58.7185	5.70261	6	4352
159	379.229	61.6556	4.85701	6	4370
1	490.434	101.382	6.47963	7	6
2	491.182	100.803	6.64202	7	41
3	491.329	100.074	7.01558	7	77
4	491.348	99.8325	6.64726	7	112
5	499.502	94.6047	2.5	7	143
6	500.298	94.366	2.5	7	175
7	501.621	94.3399	2.5	7	208
8	501.828	94.0729	2.5	7	238
9	501.816	94.0375	2.5	7	272
10	500.32	94.0724	2.5	7	308
11	498.926	94.0843	2.5	7	345
12	497.953	94.5891	2.5	7	383
13	495.857	94.4004	3.97175	7	424
14	493.406	96.1865	5.60657	7	459
15	490.79	99.1091	7.4963	7	501
16	490.319	100.011	8.0666	7	541
17	489.732	100.899	9.37988	7	580
18	488.678	102.109	10.1816	7	620
19	487.674	102.988	9.16655	7	665
20	487.197	103.225	7.27453	7	704
21	488.552	101.941	7.00606	7	744
22	489.125	101.753	7.21489	7	782
23	489.734	100.779	7.16373	7	820
24	489.744	100.486	6.87349	7	856
25	507.934	94.8595	3.98386	7	890
26	507.934	91.7308	5.61514	7	924
1	32.7007	268.748	2.5	8	7
2	32.6324	268.903	2.5	8	42
3	32.4713	268.841	2.5	8	78
4	32.5085	268.431	2.5	8	113
5	32.3396	268.742	2.5	8	148
6	32.4479	268.973	2.5	8	181
7	32.4503	268.583	2.5	8	214
8	32.3814	268.931	2.5	8	243
9	32.1213	268.974	2.5	8	277
10	32.0177	268.749	2.5	8	314
11	31.879	268.907	2.5	8	352
12	31.8749	269.175	2.5	8	390
13	31.6685	269.383	2.5	8	428
14	31.5969	269.413	2.5	8	463
15	31.5265	269.39	2.5	8	505
16	31.5516	269.388	2.5	8	545
17	31.4135	269.271	2.5	8	582
18	31.5745	269.209	2.5	8	623
19	31.5476	269.355	2.5	8	667
20	31.6822	269.508	2.5	8	708
21	31.5571	269.747	2.5	8	748
22	31.6461	269.423	2.5	8	785
23	31.6695	269.74	2.5	8	823
24	31.5765	269.256	2.5	8	859
25	31.6182	269.071	2.5	8	896
26	31.7182	269.028	2.5	8	929
27	31.6978	269.418	2.5	8	961
28	31.7044	269.878	2.5	8	994
29	31.7275	269.907	2.5	8	1026
30	31.7877	270.077	2.5	8	1059
31	31.8168	269.769	2.5	8	1092
32	31.8536	269.504	2.5	8	1124
33	31.8518	269.721	2.5	8	1157
34	32.1661	269.943	2.5	8	1194
35	32.4249	269.72	2.5	8	1227
36	32.1855	269.845	2.5	8	1262
37	32.2315	269.898	2.5	8	1298
38	32.2016	269.849	2.5	8	1331
39	32.1054	269.786	2.5	8	1364
40	32.0907	269.8	2.5	8	1398
41	32.1935	270.13	2.5	8	1430
42	32.3859	269.395	2.5	8	1463
43	32.2259	269.307	2.5	8	1494
44	32.1201	269.516	2.5	8	1526
45	32.2018	269.424	2.5	8	1556
46	31.9873	269.788	2.5	8	1588
47	31.7794	270.143	2.5	8	1620
48	32.0597	269.905	2.5	8	1653
49	32.0972	269.279	2.5	8	1684
50	32.0931	269.016	2.5	8	1713
51	32.1015	268.732	2.5	8	1742
52	32.0536	268.732	2.5	8	1772
53	31.9593	268.887	2.5	8	1801
54	31.8159	268.832	2.5	8	1831
55	31.7861	268.924	2.5	8	1859
56	31.9333	268.658	2.5	8	1888
57	31.9042	268.472	2.5	8	1919
58	31.8468	268.279	2.5	8	1951
59	31.7889	268.537	2.5	8	1982
60	31.6947	268.531	2.5	8	2012
61	31.7498	268.836	2.5	8	2041
62	31.6518	268.844	2.5	8	2069
63	31.7928	268.797	2.5	8	2096
64	31.6692	268.771	2.5	8	2121
65	31.6919	268.771	2.5	8	2150
66	31.5519	268.876	2.5	8	2179
67	31.4369	269.318	2.5	8	2207
68	31.445	269.825	2.5	8	2235
69	31.5352	270.295	3.79013	8	2264
70	31.3531	270.543	3.87809	8	2288
71	31.5562	270.212	3.82922	8	2314
72	31.3488	270.017	2.5	8	2338
73	31.4339	270.629	2.5	8	2361
74	31.546	270.979	2.5	8	2384
75	31.9035	271.336	3.79198	8	2410
76	31.9206	271.231	2.5	8	2431
77	32.3319	271.432	4.53809	8	2453
78	32.0807	271.018	3.94964	8	2474
79	32.3047	271.236	4.14448	8	2495
80	32.0292	270.88	3.95946	8	2515
81	32.0587	270.999	4.02457	8	2536
82	31.9268	270.976	4.38089	8	2556
83	31.8556	270.606	4.32256	8	2577
84	31.6205	270.208	2.5	8	2597
85	31.797	270.171	2.5	8	2618
86	31.9262	270.139	2.5	8	2639
87	31.9456	270.411	4.10453	8	2660
88	31.8162	270.176	4.22351	8	2681
89	31.7584	269.716	4.285	8	2703
90	31.6693	270.003	2.5	8	2724
91	31.6853	270.276	2.5	8	2744
92	31.9133	270.266	2.5	8	2765
93	31.7989	270.064	2.5	8	2788
94	31.7364	269.67	4.271	8	2812
95	31.6356	269.396	4.14637	8	2836
96	31.5984	269.449	4.40469	8	2860
97	31.6893	269.41	4.06836	8	2885
98	31.39	269.744	2.5	8	2910
99	31.5537	269.792	3.75508	8	2936
100	31.4802	269.716	3.88856	8	2964
101	31.255	269.62	4.54671	8	2992
102	31.121	269.489	4.85892	8	3019
103	30.625	270.103	3.97507	8	3046
104	31.1951	269.468	4.59181	8	3076
105	31.2655	269.452	4.84146	8	3103
106	31.1706	269.327	4.68875	8	3131
107	31.0997	269.499	4.68012	8	3155
108	31.182	269.551	4.17695	8	3182
109	31.3581	269.705	4.23175	8	3209
110	31.4093	269.673	4.75553	8	3238
111	31.0939	270.482	5.17862	8	3265
112	31.2363	270.872	4.7363	8	3292
113	31.4855	271.007	4.64089	8	3323
114	31.2555	271.028	4.24681	8	3351
115	31.1757	270.948	5.13241	8	3381
116	31.1366	270.875	5.10761	8	3410
117	31.0572	270.838	4.76087	8	3438
118	31.386	270.981	4.21525	8	3467
119	31.3852	271.424	4.47782	8	3492
120	31.5922	271.227	5.06103	8	3520
121	31.5173	271.054	5.13957	8	3548
122	31.457	271.066	5.23209	8	3576
123	31.5668	270.475	4.81267	8	3605
124	31.7078	270.895	4.55722	8	3629
125	31.393	270.62	4.35646	8	3653
126	31.0991	271.189	5.16254	8	3674
127	31.2911	270.741	5.37845	8	3694
128	31.3162	270.93	5.63124	8	3714
129	31.5888	269.95	5.33253	8	3732
130	31.443	270.339	5.4243	8	3754
131	31.5208	269.932	4.58851	8	3776
132	31.5573	269.935	4.0342	8	3796
133	31.5345	269.976	4.88163	8	3820
134	31.3306	270.02	5.23948	8	3845
135	31.3515	269.812	4.54513	8	3866
136	31.2235	269.95	4.54576	8	3889
137	31.3429	269.905	5.18799	8	3914
138	31.2943	269.572	5.45962	8	3938
139	31.3074	269.585	5.59596	8	3959
140	31.0241	269.997	5.45989	8	3980
141	31.0567	269.872	4.95483	8	4004
142	31.0227	269.901	6.00091	8	4029
143	30.893	269.951	5.86533	8	4053
144	30.9641	269.916	6.36845	8	4078
145	30.85	269.712	5.89799	8	4100
146	30.7944	269.765	5.8865	8	4121
147	30.7505	269.655	5.60234	8	4143
148	30.8106	269.94	5.63225	8	4164
149	30.8075	269.872	6.11309	8	4182
150	30.8267	269.993	6.02897	8	4202
151	30.7777	269.758	6.07163	8	4220
152	30.9784	269.872	6.04623	8	4239
153	30.8007	270.211	5.93973	8	4259
154	30.8781	270.334	6.09017	8	4278
155	31.1334	270.181	6.33412	8	4299
156	30.9464	270.39	6.53292	8	4317
157	31.0962	270.139	6.30993	8	4337
158	31.0382	270.685	6.2794	8	4356
159	31.1206	270.675	6.14364	8	4373
160	31.22	270.793	5.91862	8	4391
161	31.2045	270.61	6.13607	8	4409
162	31.3703	270.47	6.61898	8	4425
163	31.2131	270.507	6.33138	8	4441
164	31.1929	270.42	6.04301	8	4454
165	31.3534	270.693	6.15131	8	4468
166	31.4705	270.729	5.76556	8	4485
167	31.4017	270.683	5.55742	8	4497
168	31.4727	270.355	5.96108	8	4512
169	31.4406	270.09	6.09267	8	4525
170	31.6933	270.478	6.5721	8	4541
171	31.5682	270.759	6.27831	8	4555
172	31.4765	270.808	6.38268	8	4569
173	31.3528	271.214	6.2902	8	4583
174	31.482	270.849	6.48123	8	4598
175	31.4647	270.465	6.52177	8	4613
176	31.3678	270.243	6.60502	8	4626
177	31.3624	270.375	6.50454	8	4642
178	31.2515	270.508	6.43199	8	4658
179	31.3694	270.678	6.25888	8	4674
180	31.3066	270.813	6.34706	8	4688
181	31.324	270.42	6.77031	8	4704
182	31.139	270.175	6.85643	8	4720
183	31.1103	269.769	6.68631	8	4736
184	31.0217	269.86	6.62582	8	4754
185	30.9627	270.225	6.45888	8	4774
186	31.1269	270.152	6.8285	8	4791
187	30.9938	269.933	6.93116	8	4810
188	31.0075	269.813	6.94163	8	4827
189	30.8794	269.785	6.45194	8	4844
190	30.7931	270.209	6.66007	8	4861
191	30.7642	270.66	6.75334	8	4879
192	30.6696	269.85	7.18746	8	4896
193	30.7585	269.835	7.23975	8	4915
194	30.5669	269.886	7.23372	8	4934
195	30.7447	270.215	7.33143	8	4951
196	30.6904	270.344	6.90696	8	4968
197	30.9006	270.288	6.61303	8	4984
198	30.9527	270.44	6.98321	8	5001
199	30.862	270.396	7.19896	8	5019
200	30.8618	270.26	7.15776	8	5036
201	30.8111	270.091	7.23083	8	5056
202	31.048	270.096	6.78446	8	5076
203	31.027	270.75	6.95907	8	5095
204	31.3237	270.986	6.73079	8	5113
205	31.2218	270.871	7.14711	8	5131
206	31.2081	270.63	7.16348	8	5151
207	31.0346	270.631	7.08496	8	5173
208	31.1586	270.956	6.96352	8	5194
209	31.2204	271.3	6.50876	8	5216
210	31.2881	271.414	6.56105	8	5238
211	31.3298	271.039	7.04583	8	5261
212	31.3746	270.79	7.3096	8	5281
213	31.2814	270.732	7.05568	8	5301
214	31.4402	270.618	6.89128	8	5324
215	31.2271	270.866	6.77465	8	5350
216	31.5964	270.652	6.86048	8	5374
217	31.4717	270.737	6.93648	8	5397
218	31.4424	271.028	6.86661	8	5423
219	31.0752	270.939	6.9256	8	5444
220	31.0996	270.852	6.85327	8	5468
221	31.1538	270.943	6.71022	8	5493
222	31.1052	270.925	6.95713	8	5516
223	31.1136	270.542	7.35982	8	5536
224	31.0079	270.192	7.34664	8	5558
225	30.9112	270.311	7.0308	8	5582
226	31.0381	270.553	7.09711	8	5605
227	31.0515	270.91	6.93018	8	5626
228	30.9379	270.496	7.50625	8	5649
229	30.8407	270.289	7.48571	8	5672
230	30.6414	270.054	7.29815	8	5694
231	30.8739	269.899	7.44107	8	5715
232	30.8097	270.095	7.07116	8	5738
233	30.9208	270.084	7.13873	8	5756
234	30.8386	270.005	7.67557	8	5779
235	30.8292	270.005	7.82799	8	5796
236	30.6575	270.362	7.7993	8	5813
237	30.8068	270.311	7.53793	8	5830
238	30.7919	270.374	7.22481	8	5848
239	30.8348	270.574	6.98196	8	5864
240	30.9989	270.307	7.51636	8	5881
1	65.5397	287.779	2.5	9	8
2	65.7298	287.956	2.5	9	43
3	65.5848	287.8	2.5	9	79
4	64.8139	287.522	2.5	9	114
5	64.7074	287.426	2.5	9	149
6	65.154	287.664	2.5	9	182
7	64.7311	287.601	2.5	9	215
8	65.3558	287.698	2.5	9	244
9	64.8414	287.449	2.5	9	278
10	64.4813	287.387	2.5	9	315
11	63.7716	287.137	2.5	9	353
12	62.4712	286.809	2.5	9	391
13	60.5009	286.299	2.5	9	429
14	60.521	286.414	2.5	9	464
15	60.2307	286.305	2.5	9	506
16	59.7	286.06	2.5	9	546
17	58.0617	285.651	2.5	9	583
18	56.6436	285.223	2.5	9	624
19	56.0751	285.176	2.5	9	668
20	55.4622	285.101	2.5	9	709
21	55.4087	285.17	2.5	9	749
22	55.4597	285.123	2.5	9	786
23	55.8792	285.366	2.5	9	824
24	55.8419	285.313	2.5	9	860
25	56.4628	285.894	2.5	9	897
26	56.6397	285.89	2.5	9	930
27	56.6836	285.964	2.5	9	962
28	56.5442	285.993	2.5	9	995
29	56.5251	286.082	2.5	9	1027
30	56.7409	286.03	2.5	9	1060
31	56.5349	286.041	2.5	9	1093
32	56.819	286.258	2.5	9	1125
33	56.5569	286.178	2.5	9	1158
34	56.1567	286.112	2.5	9	1195
35	55.9148	285.946	2.5	9	1228
36	55.8984	285.953	2.5	9	1263
37	55.7902	285.741	2.5	9	1299
38	55.6727	285.649	2.5	9	1332
39	55.1646	285.396	2.5	9	1365
40	55.2013	285.606	2.5	9	1399
41	54.9379	285.468	2.5	9	1431
42	55.08	285.423	2.5	9	1464
43	55.2418	285.328	2.5	9	1495
44	55.9403	285.491	2.5	9	1527
45	55.6908	285.369	2.5	9	1557
46	55.6752	285.601	2.5	9	1589
47	55.803	285.722	2.5	9	1621
48	56.2287	285.796	2.5	9	1654
49	56.3092	285.911	2.5	9	1685
50	56.3075	285.782	2.5	9	1714
51	55.9701	285.488	2.5	9	1743
52	55.3983	285.429	2.5	9	1773
53	55.2895	285.479	2.5	9	1802
54	55.8041	285.69	2.5	9	1832
55	55.7153	285.531	2.5	9	1860
56	55.5664	285.433	2.5	9	1889
57	55.7479	285.361	2.5	9	1920
58	55.8822	285.476	2.5	9	1952
59	55.7023	285.558	2.5	9	1983
60	55.5556	285.417	2.5	9	2013
61	55.4813	285.482	2.5	9	2042
62	55.3355	285.435	2.5	9	2070
63	55.4437	285.417	2.5	9	2097
64	54.8738	285.24	2.5	9	2122
65	55.0351	285.396	2.5	9	2151
66	54.9352	285.544	2.5	9	2180
67	54.7084	285.744	2.5	9	2208
68	55.1082	285.673	2.5	9	2236
69	55.2629	285.897	2.5	9	2262
70	55.429	286.086	2.5	9	2287
71	55.6199	286.105	2.5	9	2313
72	55.5929	286.187	2.5	9	2339
73	55.6645	286.18	2.5	9	2362
74	55.8098	286.534	2.5	9	2385
75	55.5411	286.375	2.5	9	2408
76	55.6694	286.487	2.5	9	2432
77	55.7626	286.483	2.5	9	2452
78	55.2728	286.229	2.5	9	2473
79	55.1297	286.167	2.5	9	2494
80	54.639	286.308	2.5	9	2514
81	54.4443	285.96	2.5	9	2534
82	53.9438	285.453	2.5	9	2555
83	53.4501	285.152	3.944	9	2578
84	53.7257	285.603	2.5	9	2598
85	54.1599	285.919	2.5	9	2619
86	53.5225	285.37	3.87706	9	2640
87	53.9532	285.322	3.77786	9	2661
88	55.1207	286.182	2.5	9	2680
89	54.7724	285.681	3.77827	9	2704
90	54.9858	285.998	2.5	9	2725
91	54.7326	285.843	2.5	9	2745
92	54.1318	285.759	2.5	9	2766
93	54.0188	285.256	3.88604	9	2789
94	53.264	284.741	4.11292	9	2813
95	52.3447	283.954	4.50709	9	2837
96	52.6461	284.031	4.18587	9	2861
97	50.9259	282.452	4.8777	9	2886
98	50.7938	282.605	4.62073	9	2911
99	50.9226	283.265	4.47806	9	2937
100	52.433	284.188	4.46859	9	2965
101	52.6462	284.218	4.57677	9	2993
102	52.4816	284.039	4.69889	9	3020
103	52.6708	284.419	3.95299	9	3047
104	52.9787	284.401	4.84573	9	3077
105	54.4271	285.375	4.54135	9	3104
106	54.1581	285.268	4.34352	9	3132
107	54.0598	285.409	4.39625	9	3156
108	52.638	284.565	4.38476	9	3183
109	52.5987	284.767	4.37427	9	3210
110	52.8546	284.769	4.99384	9	3239
111	53.1514	285.206	4.72475	9	3266
112	53.7605	285.655	4.27595	9	3293
113	54.6926	286.697	2.5	9	3322
114	54.874	286.653	4.40233	9	3352
115	55.066	286.448	4.37841	9	3382
116	55.2881	286.558	4.09105	9	3411
117	55.0566	286.431	4.17831	9	3439
118	54.7099	286.792	2.5	9	3466
119	54.8958	286.787	4.3955	9	3493
120	54.3288	286.371	4.57169	9	3521
121	54.5728	286.181	4.56148	9	3549
122	54.3463	286.305	4.56208	9	3577
123	54.4964	286.33	4.26946	9	3606
124	54.551	286.374	3.83782	9	3630
125	55.5634	287.508	3.91075	9	3654
126	55.85	287.414	4.77765	9	3675
127	55.9356	286.975	4.82645	9	3695
128	56.0119	287.065	4.981	9	3715
129	55.2115	286.732	4.92503	9	3733
130	55.6205	287.01	4.44714	9	3755
131	56.009	287.212	4.11664	9	3777
132	55.4408	287.122	4.55935	9	3797
133	55.4985	286.813	4.88017	9	3821
134	55.4317	286.565	5.18937	9	3846
135	55.256	286.959	4.2735	9	3867
136	55.6682	286.882	4.55642	9	3890
137	54.7313	286.558	5.20473	9	3915
138	55.1529	286.24	5.36863	9	3939
139	55.082	286.143	5.28518	9	3960
140	54.3837	286.199	4.87633	9	3981
141	54.0654	286.082	4.4858	9	4005
142	53.93	285.865	5.25385	9	4030
143	53.6158	285.724	5.82282	9	4054
144	53.9114	285.488	5.86867	9	4076
145	54.3772	285.876	5.45245	9	4101
146	53.9837	285.654	5.3027	9	4122
147	54.2778	286.01	5.18684	9	4144
148	54.6309	286.235	5.60129	9	4165
149	54.5252	286.216	5.72858	9	4183
150	54.0503	285.7	6.00116	9	4203
151	53.8289	285.645	5.74407	9	4221
152	53.634	285.804	5.72593	9	4240
153	52.5402	285.789	5.75673	9	4260
154	52.7953	285.702	6.08472	9	4279
155	52.8677	285.626	6.12441	9	4297
156	52.896	286.111	5.87972	9	4316
157	52.8018	285.985	5.74658	9	4336
158	52.5733	286.084	5.75138	9	4355
159	52.8461	286.233	5.78089	9	4374
160	52.5949	286.566	5.7484	9	4392
161	52.7687	286.002	6.10189	9	4410
162	52.8416	285.733	6.15118	9	4424
163	52.7067	285.852	5.97176	9	4440
164	53.0534	286.098	5.79533	9	4455
165	52.4058	286.045	5.74469	9	4469
166	52.4019	285.937	6.02273	9	4486
167	53.1051	286.258	5.73296	9	4498
168	53.1384	286.512	6.14478	9	4513
169	53.2139	286.432	6.04847	9	4526
170	52.8385	286.066	6.14772	9	4540
171	53.0162	286.179	5.99589	9	4554
172	53.3633	286.522	5.94803	9	4568
173	53.2602	286.727	5.83632	9	4582
174	53.1273	286.083	6.44227	9	4599
175	52.9736	285.801	6.23238	9	4612
176	53.5553	285.976	6.25405	9	4627
177	53.0918	285.924	6.47921	9	4643
178	53.0458	286.107	6.28376	9	4659
179	53.1763	286.251	5.69903	9	4673
180	53.1403	286.042	6.27928	9	4689
181	53.3184	285.868	6.28538	9	4705
182	53.309	285.481	6.51824	9	4721
183	53.3548	285.596	6.47867	9	4737
184	53.6296	285.872	6.31166	9	4755
185	52.7573	285.898	6.18097	9	4773
186	52.9471	285.621	6.60191	9	4792
187	52.9378	285.48	6.68464	9	4811
188	53.2756	285.294	6.76542	9	4828
189	52.9313	285.709	6.33655	9	4845
190	52.6227	285.711	6.36676	9	4862
191	52.4737	285.564	6.66345	9	4880
192	52.5653	285.298	6.92068	9	4897
193	52.1814	285.191	7.03446	9	4916
194	51.9976	285.102	6.91617	9	4935
195	51.952	285.066	6.94721	9	4952
196	55.6236	286.899	6.37478	9	4969
197	52.137	285.698	6.62113	9	4985
198	51.081	285.24	7.12517	9	5002
199	51.4032	285.296	7.03721	9	5020
200	53.5775	286.252	6.97813	9	5037
201	48.8085	283.63	7.38715	9	5057
202	48.4426	283.887	7.25511	9	5077
203	53.0905	286.334	6.68395	9	5096
204	53.0082	286.154	6.79523	9	5114
205	52.4239	285.649	7.04149	9	5132
206	51.176	284.913	7.06629	9	5152
207	50.7477	284.75	7.11592	9	5174
208	50.4925	284.711	6.97288	9	5195
209	50.3244	285.212	6.78775	9	5217
210	48.487	284.613	7.23049	9	5239
211	49.4224	284.67	7.34259	9	5262
212	49.9578	284.992	7.32341	9	5282
213	50.3013	284.742	7.06482	9	5302
214	49.6208	284.521	7.22731	9	5325
215	49.8385	284.715	7.08209	9	5351
216	50.2588	284.543	7.1027	9	5375
217	50.1823	284.52	7.08463	9	5398
218	50.3104	284.973	7.01625	9	5424
219	49.8309	284.128	7.0335	9	5445
220	50.0367	284.288	7.03565	9	5469
221	50.9578	285.096	6.80898	9	5494
222	49.881	284.11	7.26152	9	5517
223	49.9901	283.877	7.33816	9	5537
224	49.9773	283.845	7.3735	9	5559
225	50.1192	284.103	7.3666	9	5583
226	51.8795	285.294	7.17076	9	5606
227	52.3933	285.581	7.09407	9	5627
228	52.9306	285.533	7.12808	9	5650
229	52.4236	285.042	7.23464	9	5673
230	51.8896	285.07	7.23194	9	5695
231	51.9219	285.178	7.08606	9	5716
232	51.7063	285.4	7.30809	9	5739
233	52.0207	285.464	7.29265	9	5757
234	52.3265	285.12	7.4958	9	5780
235	51.6148	284.594	7.58466	9	5797
236	51.7503	284.95	7.51212	9	5814
237	51.7039	285.175	7.32455	9	5831
238	50.5036	284.174	7.66129	9	5849
239	48.4469	283.096	7.75262	9	5866
240	48.1022	282.237	8.07701	9	5883
1	52.6396	295.205	2.5	10	9
2	51.296	295.828	2.5	10	44
3	51.3426	295.549	2.5	10	80
4	52.164	295.267	2.5	10	115
5	52.484	295.154	2.5	10	150
6	51.7552	295.48	2.5	10	183
7	50.8752	296.109	2.5	10	216
8	50.7387	295.725	2.5	10	245
9	50.9691	295.503	2.5	10	279
10	51.0143	295.192	2.5	10	316
11	51.0276	295.222	2.5	10	354
12	51.1058	295.139	2.5	10	392
13	50.8555	295.485	2.5	10	430
14	50.1098	296.022	2.5	10	465
15	50.614	295.386	2.5	10	507
16	50.7637	294.994	2.5	10	547
17	51.3839	294.413	2.5	10	584
18	51.0926	294.91	2.5	10	625
19	51.0289	295.208	2.5	10	669
20	50.1221	296.249	2.5	10	710
21	50.5531	295.949	2.5	10	750
22	51.1891	295.459	2.5	10	787
23	50.823	295.313	2.5	10	825
24	51.689	294.676	2.5	10	861
25	52.4352	294.634	2.5	10	898
26	51.4945	295.507	2.5	10	931
27	50.625	296.573	2.5	10	963
28	50.4071	296.457	2.5	10	996
29	51.0929	296.004	2.5	10	1028
30	50.4974	296.125	2.5	10	1061
31	51.0621	295.767	2.5	10	1094
32	52.8153	295.313	2.5	10	1126
33	51.5418	296.255	2.5	10	1159
34	50.4859	297.032	2.5	10	1196
35	51.1518	296.295	2.5	10	1229
36	51.1125	296.049	2.5	10	1264
37	51.2355	295.891	2.5	10	1300
38	51.186	296.081	2.5	10	1333
39	50.6056	296.481	2.5	10	1366
40	50.157	297.225	2.5	10	1400
41	50.2794	296.944	3.7533	10	1433
42	50.2307	296.991	4.07755	10	1466
43	50.1449	296.854	4.37919	10	1497
44	50.2764	296.53	3.95772	10	1529
45	50.6951	296.219	4.0132	10	1559
46	51.5994	295.728	2.5	10	1590
47	51.0611	296.328	2.5	10	1622
48	52.3939	295.674	4.48572	10	1656
49	51.3432	295.907	4.28019	10	1688
50	51.4916	295.646	4.40289	10	1717
51	52.0802	294.849	2.5	10	1744
52	51.5932	295.104	3.89325	10	1775
53	51.7575	295.277	2.5	10	1803
54	52.6309	295.118	4.57343	10	1834
1	235.627	492.759	2.5	11	10
2	235.469	492.706	2.5	11	45
3	235.842	492.718	2.5	11	81
4	235.525	492.658	2.5	11	116
5	235.778	492.684	2.5	11	151
6	235.775	492.613	2.5	11	184
7	234.558	492.34	2.5	11	217
8	234.006	492.222	2.5	11	246
9	233.433	492.044	2.5	11	280
10	233.679	492.063	2.5	11	317
11	233.838	492.145	2.5	11	355
12	234.886	492.197	2.5	11	393
13	234.503	492.194	2.5	11	431
14	236.708	492.646	2.5	11	466
15	239.817	493.273	2.5	11	508
16	241.797	493.37	2.5	11	548
17	242.401	493.213	2.5	11	585
18	241.444	493.228	2.5	11	626
19	241.197	493.176	2.5	11	670
20	241.204	493.157	2.5	11	711
21	241.555	493.522	2.5	11	751
22	242.15	493.748	2.5	11	788
23	242.848	493.582	2.5	11	826
24	243.188	493.753	2.5	11	862
25	242.303	493.867	2.5	11	899
26	239.368	493.638	2.5	11	932
27	237.569	493.342	2.5	11	964
28	236.063	493.109	2.5	11	997
29	234.882	492.87	2.5	11	1029
30	234.205	492.914	2.5	11	1062
31	234.831	492.904	2.5	11	1095
32	234.775	492.917	2.5	11	1127
33	235.216	493.07	2.5	11	1160
34	235.781	493.283	2.5	11	1197
35	235.441	493.3	2.5	11	1230
36	235.243	493.199	2.5	11	1265
37	236.022	493.209	2.5	11	1301
38	235.25	493.096	2.5	11	1334
39	234.978	492.987	2.5	11	1367
40	234.989	492.972	2.5	11	1401
41	235.126	493.072	2.5	11	1432
42	235.282	493.106	2.5	11	1465
43	235.672	492.919	2.5	11	1496
44	235.679	493.003	2.5	11	1528
45	235.913	492.995	2.5	11	1558
46	235.939	492.816	2.5	11	1591
47	235.881	492.862	2.5	11	1623
48	235.229	492.81	2.5	11	1655
49	235.194	492.817	2.5	11	1687
50	235.267	492.805	2.5	11	1716
51	235.773	492.863	2.5	11	1745
52	237.186	492.972	2.5	11	1774
53	241.086	493.327	2.5	11	1804
54	239.22	493.313	2.5	11	1833
55	240.869	493.573	2.5	11	1862
56	241.265	493.424	2.5	11	1891
57	241.751	493.501	3.84055	11	1922
58	241.346	493.59	3.93098	11	1954
59	241.426	493.452	4.25989	11	1985
60	241.315	493.585	4.16427	11	2015
61	237.968	493.188	2.5	11	2043
62	236.748	493.094	2.5	11	2071
63	235.077	492.603	2.5	11	2099
64	234.312	492.815	2.5	11	2123
65	233.633	492.647	3.76087	11	2153
66	234.007	492.763	2.5	11	2181
67	226.893	494.584	12.3901	11	2220
1	108.498	373.779	5.05168	12	11
2	108.164	373.026	5.29886	12	46
3	108.025	371.829	5.13705	12	82
4	108.395	372.45	5.18603	12	117
5	109.424	372.466	4.08125	12	152
7	107.832	382.093	7.57709	12	218
1	26.5846	401.604	9.7216	13	12
2	27.9141	403.242	10.0847	13	47
3	27.2626	405.298	10.1917	13	83
4	22.2764	405.963	11.0068	13	118
5	17.9862	407.63	11.3373	13	161
6	17.0461	407.94	10.7278	13	185
7	23.0496	404.959	9.52681	13	220
8	38.1037	405.87	9.36707	13	248
9	44.5228	402.898	8.88128	13	281
10	49.1552	401.574	6.98749	13	319
1	261.921	288.609	2.5	14	13
2	262.283	254.259	2.5	14	48
3	266.299	252.037	2.5	14	76
4	266.952	251.13	2.5	14	110
5	266.941	251.064	2.5	14	145
6	266.793	251.782	2.5	14	177
7	264.394	253.354	2.5	14	210
8	262.696	254.493	2.5	14	249
9	262.017	255.308	2.5	14	283
10	266.802	250.903	2.5	14	310
11	265.757	251.925	2.5	14	347
12	265.77	251.855	2.5	14	385
13	263.189	253.587	2.5	14	423
14	262.476	254.329	2.5	14	468
15	263.662	252.567	2.5	14	498
16	261.175	254.85	2.5	14	550
17	261.435	254.314	2.5	14	587
18	261.953	254.022	2.5	14	628
19	267.004	249.616	2.5	14	661
20	266.378	250.496	2.5	14	702
21	264.237	252.499	2.5	14	741
22	261.914	254.655	2.5	14	791
23	259.635	256.539	2.5	14	828
24	259.522	255.902	2.5	14	864
25	265.044	252.295	2.5	14	888
26	266.845	250.929	2.5	14	923
27	266.862	250.714	2.5	14	954
28	266.445	250.644	2.5	14	986
29	266.339	251.927	2.5	14	1019
30	266.422	251.731	2.5	14	1051
31	265.546	252.943	2.5	14	1085
32	262.207	255.321	2.5	14	1130
33	260.6	256.004	2.5	14	1165
34	260.554	256.553	2.5	14	1201
35	260.536	256.057	2.5	14	1234
36	257.123	254.257	2.5	14	1269
37	252.54	247.688	3.89498	14	1287
38	247.883	241.866	7.14051	14	1320
39	248.098	238.706	7.50416	14	1354
40	250.394	239.483	7.55358	14	1386
41	251.392	239.764	7.37279	14	1418
42	250.598	240.012	7.41042	14	1452
43	253.24	239.542	8.68791	14	1483
1	391.924	289.075	2.5	15	14
2	391.684	289.57	2.5	15	49
3	391.382	289.613	2.5	15	84
4	391.339	289.333	2.5	15	119
5	391.333	289.384	2.5	15	153
6	392.056	288.533	2.5	15	186
7	392.033	288.724	2.5	15	221
8	391.753	288.415	2.5	15	250
9	391.253	289.033	2.5	15	284
10	390.726	289.69	2.5	15	320
11	390.23	289.888	2.5	15	357
12	390.537	289.416	2.5	15	395
13	392.123	287.219	2.5	15	433
14	391.981	287.153	2.5	15	469
15	391.234	287.836	2.5	15	510
16	391.069	288.38	2.5	15	551
17	390.918	288.57	2.5	15	588
18	391.154	288.402	2.5	15	629
19	391.332	287.682	2.5	15	673
20	391.627	287.713	2.5	15	713
21	391.871	287.555	2.5	15	754
22	390.867	289.112	2.5	15	792
23	390.37	289.758	2.5	15	829
24	389.613	290.525	2.5	15	866
25	389.843	290.646	2.5	15	902
26	391.07	289.308	2.5	15	934
27	391.446	288.774	2.5	15	966
28	391.319	288.892	2.5	15	999
29	391.649	288.712	2.5	15	1031
30	391.589	288.698	2.5	15	1065
31	391.615	288.718	2.5	15	1098
32	391.568	289.112	2.5	15	1131
33	391.444	289.49	2.5	15	1166
34	391.767	289.45	2.5	15	1202
35	391.727	289.098	2.5	15	1235
36	391.035	290.038	2.5	15	1270
37	391.015	289.96	2.5	15	1305
38	391.338	289.964	2.5	15	1338
39	391.713	289.272	2.5	15	1370
40	392.379	287.805	2.5	15	1405
41	392.23	287.899	2.5	15	1437
42	391.799	289.366	2.5	15	1470
43	391.113	290.159	2.5	15	1501
44	390.949	289.998	2.5	15	1533
45	391.524	289.16	2.5	15	1562
46	392.083	288.276	2.5	15	1594
47	392.434	287.239	2.5	15	1627
48	392.6	285.383	2.5	15	1660
49	392.254	286.391	2.5	15	1691
50	391.656	288.04	2.5	15	1719
51	391.017	289.027	2.5	15	1748
52	391.306	288.691	2.5	15	1780
53	391.528	288.2	2.5	15	1809
54	391.591	287.772	2.5	15	1840
55	391.63	287.342	2.5	15	1867
56	391.406	287.961	2.5	15	1896
57	390.474	289.135	2.5	15	1926
58	390.99	288.684	2.5	15	1958
59	391.514	287.065	2.5	15	1989
60	391.757	286.503	2.5	15	2019
61	391.487	287.333	2.5	15	2048
62	391.001	288.394	2.5	15	2076
63	390.825	288.998	2.5	15	2104
64	390.398	288.856	2.5	15	2128
65	390.915	287.972	2.5	15	2157
66	391.488	287.186	2.5	15	2187
67	391.359	287.673	2.5	15	2214
68	391.343	287.763	2.5	15	2242
69	391.193	288.049	2.5	15	2268
70	390.941	289	2.5	15	2292
71	391.154	288.918	2.5	15	2318
72	391.284	288.279	2.5	15	2343
73	391.323	288.482	2.5	15	2366
74	391.409	288.7	2.5	15	2389
75	391.011	289.184	2.5	15	2413
76	391.465	288.631	2.5	15	2435
77	391.51	288.987	2.5	15	2456
78	391.405	289.317	2.5	15	2477
79	391.267	289.49	2.5	15	2498
80	391.556	289.19	2.5	15	2518
81	391.533	289.214	2.5	15	2539
82	391.359	288.824	2.5	15	2560
83	391.279	289.089	2.5	15	2581
84	391.388	289.181	2.5	15	2602
85	391.147	289.43	2.5	15	2622
86	391.039	289.866	2.5	15	2643
87	390.94	289.783	2.5	15	2663
88	391.077	289.397	2.5	15	2684
89	391.242	289.03	2.5	15	2707
90	391.457	288.672	2.5	15	2728
91	391.866	288.367	2.5	15	2748
92	391.668	288.586	2.5	15	2769
93	391.622	288.429	2.5	15	2792
94	391.619	288.292	2.5	15	2816
95	391.149	288.887	2.5	15	2840
96	391.044	288.913	2.5	15	2864
97	391.065	288.518	2.5	15	2889
98	390.668	288.952	2.5	15	2914
99	391.243	288.467	2.5	15	2940
100	391.101	288.29	2.5	15	2968
101	391.008	287.969	2.5	15	2996
102	391.394	287.061	2.5	15	3023
103	391.889	286.042	2.5	15	3050
104	390.989	288.268	2.5	15	3080
105	390.929	287.717	2.5	15	3107
106	391.231	287.396	2.5	15	3135
107	391.355	287.567	2.5	15	3160
108	391.485	287.743	2.5	15	3187
109	391.204	288.346	2.5	15	3214
110	390.949	289.284	2.5	15	3243
111	390.212	289.853	2.5	15	3270
112	389.986	290.528	2.5	15	3297
113	389.467	291.142	2.5	15	3327
114	390.353	290.239	2.5	15	3356
115	390.389	290.133	2.5	15	3386
116	390.375	290.271	2.5	15	3415
117	389.893	290.968	2.5	15	3443
118	390.591	290.072	2.5	15	3471
119	390.782	290.095	2.5	15	3497
120	391.23	289.598	2.5	15	3525
121	390.958	290.246	2.5	15	3553
122	390.779	290.329	2.5	15	3581
123	390.77	290.685	2.5	15	3609
124	391.455	289.533	2.5	15	3633
125	391.629	289.693	2.5	15	3657
126	391.392	289.368	2.5	15	3678
127	391.459	289.205	2.5	15	3698
128	391.715	289.105	2.5	15	3717
129	391.588	289.159	2.5	15	3736
130	391.525	288.831	2.5	15	3758
131	391.893	288.46	2.5	15	3779
132	391.278	289.271	2.5	15	3801
133	391.531	288.769	2.5	15	3825
134	391.306	289.008	2.5	15	3848
135	391.038	289.559	2.5	15	3871
136	390.818	289.805	2.5	15	3894
137	391.05	289.286	2.5	15	3919
138	391.057	289.366	2.5	15	3941
139	391.584	287.638	2.5	15	3962
140	391.076	288.996	2.5	15	3983
141	391.072	288.917	2.5	15	4007
142	390.957	289.157	2.5	15	4032
143	390.927	288.97	2.5	15	4056
144	390.955	288.683	2.5	15	4079
145	390.983	288.657	2.5	15	4103
146	390.807	288.85	2.5	15	4124
147	390.862	288.565	2.5	15	4147
148	390.919	288.823	2.5	15	4167
149	390.977	288.982	2.5	15	4185
150	390.91	289.043	2.5	15	4206
151	390.701	289.487	2.5	15	4223
152	390.595	289.536	2.5	15	4243
153	390.429	289.949	2.5	15	4262
154	390.527	289.947	2.5	15	4281
155	390.605	289.924	2.5	15	4301
156	390.617	289.759	2.5	15	4321
157	390.548	289.931	2.5	15	4339
158	390.465	290.037	2.5	15	4357
159	390.453	290.286	2.5	15	4375
160	390.749	290.109	2.5	15	4394
161	390.778	290.331	2.5	15	4411
162	390.766	290.105	2.5	15	4427
163	390.824	290.004	2.5	15	4442
164	390.824	290.174	2.5	15	4457
165	390.64	290.563	2.5	15	4471
166	391.021	290.454	2.5	15	4487
167	391.057	290.457	2.5	15	4499
168	391.076	290.281	2.5	15	4514
169	391.133	290.074	2.5	15	4528
170	391.048	290.306	2.5	15	4543
171	391.095	290.307	2.5	15	4557
172	391.045	290.479	2.5	15	4571
173	391.18	290.245	2.5	15	4585
174	390.91	290.238	2.5	15	4601
175	390.983	289.983	2.5	15	4615
176	391.157	289.868	2.5	15	4629
177	391.001	290.188	2.5	15	4645
178	390.626	290.069	2.5	15	4661
179	390.656	290.282	2.5	15	4676
180	390.074	290.715	2.5	15	4691
181	390.157	290.393	2.5	15	4707
182	390.014	290.562	2.5	15	4723
183	390.393	290.163	2.5	15	4738
184	390.52	289.76	2.5	15	4756
185	390.493	289.899	2.5	15	4775
186	390.505	289.452	2.5	15	4793
187	390.164	289.786	2.5	15	4812
188	390.356	289.651	2.5	15	4829
189	390.501	289.306	2.5	15	4846
190	390.455	289.703	2.5	15	4863
191	390.408	289.44	2.5	15	4881
192	390.415	289.397	3.81817	15	4898
193	390.137	289.422	2.5	15	4917
194	390.158	289.825	2.5	15	4936
195	390.359	289.789	2.5	15	4953
196	390.491	289.547	2.5	15	4970
197	390.672	289.775	2.5	15	4986
198	390.423	289.486	2.5	15	5003
199	390.564	289.527	3.86469	15	5022
200	390.508	289.76	2.5	15	5039
201	390.759	289.628	2.5	15	5059
202	390.454	289.902	2.5	15	5079
203	390.578	290.129	2.5	15	5098
204	390.559	290.315	2.5	15	5116
205	390.748	290.477	2.5	15	5134
206	390.613	290.613	2.5	15	5154
207	390.759	290.656	2.5	15	5176
208	390.788	290.662	2.5	15	5197
209	390.947	290.692	2.5	15	5220
210	390.91	290.376	2.5	15	5241
211	390.835	290.216	4.05237	15	5264
212	390.947	290.301	2.5	15	5284
213	390.903	290.089	3.84932	15	5304
214	391.047	290.353	2.5	15	5327
215	390.985	290.494	2.5	15	5353
216	390.866	290.614	2.5	15	5378
217	390.86	290.054	2.5	15	5400
219	390.476	290.519	2.5	15	5448
220	390.53	290.411	2.5	15	5472
221	390.917	290.119	2.5	15	5496
222	390.513	290.056	4.23758	15	5519
223	390.495	290.089	4.42608	15	5539
224	390.175	290.04	4.18097	15	5561
225	390.109	290.093	3.94013	15	5585
226	390.469	290.118	2.5	15	5608
227	390.403	289.732	3.83784	15	5629
1	480.556	374.782	2.5	16	15
2	482.056	374.292	4.05793	16	51
3	481.723	374.276	2.5	16	85
4	482.169	373.987	4.56071	16	121
5	483.907	373.704	6.69222	16	157
6	482.348	373.788	6.66312	16	190
1	373.504	433.371	2.5	17	16
2	373.156	433.395	2.5	17	50
3	372.965	433.395	2.5	17	86
4	373.028	433.468	2.5	17	120
5	372.832	433.557	2.5	17	154
6	373.201	433.402	2.5	17	187
7	373.013	433.246	2.5	17	222
8	372.789	433.229	2.5	17	251
9	372.958	433.312	2.5	17	285
10	372.728	433.26	2.5	17	322
11	372.797	433.342	2.5	17	359
12	372.592	433.083	2.5	17	397
13	372.642	433.057	2.5	17	434
14	372.612	433.075	2.5	17	470
15	372.569	432.928	2.5	17	511
16	372.527	433.202	2.5	17	552
17	372.274	433.313	2.5	17	589
18	372.288	433.382	2.5	17	630
19	372.161	433.43	2.5	17	674
20	372.293	433.354	2.5	17	714
21	372.305	433.426	2.5	17	755
22	372.133	433.72	2.5	17	793
23	372.264	433.591	2.5	17	830
24	372.717	433.664	2.5	17	867
25	373.012	433.579	2.5	17	903
26	373.065	433.792	2.5	17	935
27	372.766	433.757	2.5	17	967
28	372.531	433.725	2.5	17	1000
29	372.548	433.883	2.5	17	1032
30	372.455	434.076	2.5	17	1067
31	372.595	434.008	2.5	17	1100
32	372.698	434.501	2.5	17	1133
33	372.786	434.116	2.5	17	1168
34	373.001	434.206	2.5	17	1204
35	373.02	434.115	2.5	17	1237
36	372.826	434.292	2.5	17	1272
37	372.842	434.334	2.5	17	1307
38	372.93	434.493	2.5	17	1340
39	372.762	434.692	2.5	17	1372
40	372.655	434.387	2.5	17	1407
41	372.727	434.407	2.5	17	1439
42	372.742	434.161	2.5	17	1472
43	372.658	434.072	2.5	17	1503
44	372.814	434.003	2.5	17	1535
45	372.897	433.911	2.5	17	1564
46	373.09	433.853	2.5	17	1596
47	373.145	434.064	2.5	17	1629
48	372.846	433.977	2.5	17	1662
49	372.603	433.886	2.5	17	1694
50	372.504	433.852	2.5	17	1721
51	372.482	433.736	2.5	17	1750
52	372.73	433.655	2.5	17	1782
53	372.879	433.594	2.5	17	1811
54	372.782	433.393	3.76688	17	1842
55	372.724	433.603	3.99308	17	1869
56	372.582	433.63	2.5	17	1898
57	372.054	433.556	2.5	17	1928
58	372.233	433.69	4.25855	17	1960
59	372.265	433.717	4.32481	17	1991
60	372.551	433.475	4.13428	17	2020
61	372.552	433.607	4.50615	17	2049
62	372.469	433.556	4.47181	17	2077
63	372.376	433.62	3.89815	17	2105
64	372.082	433.712	4.3239	17	2130
65	372.152	433.829	4.62547	17	2158
66	372.205	434.139	4.55747	17	2188
67	372.07	434.631	4.56192	17	2215
68	372.502	434.428	4.61373	17	2244
69	372.563	434.482	4.57674	17	2270
70	372.403	434.514	4.40871	17	2294
71	372.459	434.197	4.58134	17	2320
72	372.413	434.488	4.7033	17	2345
73	372.391	434.481	4.68636	17	2368
74	372.244	434.519	4.82024	17	2391
75	372.389	434.446	4.81014	17	2415
76	372.502	434.63	5.08926	17	2437
77	372.391	434.69	4.26029	17	2458
78	372.52	434.621	4.99699	17	2480
79	372.442	434.747	4.97453	17	2501
80	372.577	434.77	4.93842	17	2521
81	372.309	434.968	4.9192	17	2542
82	372.498	434.877	4.72056	17	2563
83	372.395	434.824	4.74798	17	2584
84	372.607	434.925	5.1921	17	2605
85	372.455	434.991	5.06219	17	2625
86	372.252	434.722	4.70093	17	2645
87	372.433	434.514	4.75198	17	2665
88	372.366	434.633	4.48143	17	2685
89	372.481	434.521	5.04077	17	2708
90	372.617	434.627	5.18474	17	2729
91	372.556	434.583	5.2665	17	2749
92	372.591	434.426	5.23992	17	2770
93	372.41	434.58	5.24318	17	2793
94	372.315	434.42	4.80537	17	2817
95	372.115	434.433	4.77839	17	2841
96	372.216	434.441	5.46244	17	2865
97	372.282	434.263	5.50489	17	2890
98	372.094	434.172	5.52303	17	2915
99	372.343	434.143	5.5347	17	2941
100	372.26	434.249	5.26628	17	2969
101	372.067	433.93	5.10921	17	2997
102	371.867	433.827	5.28266	17	3024
103	372.104	433.877	5.53717	17	3051
104	372.275	433.98	5.54292	17	3081
105	371.878	434.128	5.33865	17	3108
106	372.002	434.125	5.42025	17	3136
107	372.314	434.21	5.66583	17	3161
108	372.318	434.211	5.63694	17	3188
109	372.256	434.385	5.69161	17	3215
110	372.115	434.625	5.46086	17	3244
111	372.028	434.503	5.2911	17	3271
112	372.35	434.577	5.89005	17	3298
113	372.179	434.855	5.63939	17	3329
114	372.247	434.699	5.64269	17	3358
115	371.879	434.83	5.52043	17	3387
116	372.225	434.585	5.6998	17	3416
117	372.212	434.839	5.66824	17	3444
118	372.547	434.882	5.98501	17	3473
119	372.389	434.935	5.85331	17	3499
120	372.228	435.025	5.48858	17	3526
121	372.232	434.979	5.42722	17	3554
122	372.393	435.154	5.75899	17	3582
123	372.505	434.89	6.01445	17	3610
124	372.649	434.805	5.83652	17	3635
125	372.233	434.766	5.90247	17	3658
126	372.042	435.042	5.81562	17	3679
127	371.892	435.002	5.59738	17	3699
128	371.917	435.016	5.51765	17	3718
129	372.119	434.953	6.06576	17	3738
130	372.386	434.828	6.19125	17	3759
131	372.502	434.762	6.32201	17	3780
132	372.225	434.831	6.41788	17	3802
133	372.283	434.404	5.93311	17	3826
134	372.216	434.273	5.58506	17	3849
135	372.355	434.271	6.37349	17	3872
136	372.376	434.296	6.36646	17	3895
137	372.324	434.292	6.32859	17	3920
138	372.155	434.011	5.85406	17	3942
139	372.014	434.207	5.98176	17	3963
140	372.029	434.102	6.43363	17	3984
141	371.858	434.164	6.31078	17	4008
142	371.828	434.125	6.22359	17	4033
143	371.948	434.11	6.15719	17	4057
144	371.885	434.076	6.09735	17	4080
145	371.804	434.361	6.73782	17	4104
146	371.654	433.995	6.80079	17	4125
147	372.155	433.805	6.84145	17	4148
148	371.783	434.129	6.83324	17	4168
149	373.533	434.224	6.21052	17	4186
150	377.098	433.997	5.00642	17	4207
151	373.115	434.223	6.65399	17	4224
152	381.646	432.626	5.11427	17	4244
153	384.216	428.249	5.21623	17	4263
154	400.045	417.055	8.13179	17	4282
155	401.358	416.733	7.46155	17	4302
156	413.637	419.939	3.91248	17	4322
157	414.307	420.068	4.53355	17	4340
158	414.686	420.346	4.5688	17	4358
159	455.64	408.833	5.1244	17	4376
160	456.032	409.035	4.95094	17	4395
161	467.86	408.329	5.29873	17	4412
162	499.497	417.071	8.55042	17	4428
163	507.934	416.634	10.4288	17	4444
164	507.934	417.218	10.5888	17	4459
165	507.934	415.945	11.0429	17	4473
166	507.934	415.126	11.0342	17	4488
167	507.934	415.05	11.2816	17	4504
168	507.934	415.311	10.8332	17	4515
169	507.934	415.901	10.5661	17	4529
1	383.422	416.937	4.37237	18	17
2	385.797	417.756	6.32893	18	53
3	385.895	417.838	6.61645	18	88
4	386.822	418.009	6.67133	18	123
5	386.995	418.006	5.60687	18	156
6	401.706	415.2	5.03037	18	188
7	401.981	415.048	4.84048	18	224
8	401.303	415.059	4.16211	18	252
9	401.941	415.061	3.95462	18	286
10	402.66	414.455	2.5	18	321
11	403.644	413.747	2.5	18	358
12	406.854	404.742	2.5	18	396
1	375.353	278.296	7.43739	19	18
2	374.925	274.767	7.17183	19	52
3	376.231	269.83	6.65896	19	87
4	376.095	270.186	6.34188	19	122
5	375.877	270.122	3.96348	19	155
6	375.661	269.347	6.37812	19	189
7	374.719	267.3	7.18294	19	225
8	374.612	267.392	7.06146	19	253
9	366.098	267.694	9.74694	19	287
10	365.153	266.406	10.1141	19	323
11	366.21	268.101	10.1868	19	361
12	366.722	266.902	9.88135	19	399
13	366.029	268.646	9.75517	19	436
14	365.085	266.225	9.83978	19	472
15	365.754	267.165	10.2132	19	514
16	366.27	265.908	9.48984	19	554
17	365.689	266.139	9.55631	19	591
18	365.968	266.445	9.61388	19	632
19	364.495	266.211	9.21113	19	676
1	8.1555	213.034	11.5036	20	19
2	8.32547	213.001	11.2001	20	36
3	8.32565	213.056	11.0362	20	71
4	8.47949	211.625	10.9688	20	106
5	8.76832	211.496	10.9654	20	140
6	8.17566	212.126	11.5862	20	191
7	8.5109	211.875	10.8522	20	205
8	8.0412	212.575	11.382	20	254
9	9.01871	211.161	10.7958	20	268
10	8.22473	211.905	10.9374	20	304
11	7.7329	212.473	11.724	20	362
12	7.59575	212.076	11.84	20	400
13	7.314	212.562	11.8892	20	437
14	7.49348	212.74	11.4802	20	474
15	7.59837	213.066	11.588	20	515
16	8.18734	212.465	11.2047	20	535
17	7.63074	212.514	11.5193	20	593
18	7.32221	212.875	11.8084	20	634
19	7.3767	212.479	11.6955	20	678
20	7.2063	212.62	11.5499	20	717
21	8.12952	212.886	10.8631	20	736
22	8.7856	211.638	10.9394	20	774
23	8.56147	212.171	10.8893	20	813
24	7.52192	212.888	11.7112	20	869
25	7.45102	213.061	11.9856	20	905
26	7.27246	212.429	11.8409	20	937
27	7.29729	212.622	11.6605	20	970
28	7.57477	213.499	11.6651	20	1003
29	7.65766	213.489	11.8805	20	1035
30	7.95594	213.169	11.6712	20	1070
31	7.6207	213.142	11.7138	20	1103
32	7.42651	212.945	12.0219	20	1136
33	7.54087	213.17	11.8412	20	1172
34	8.23102	213.049	11.3821	20	1206
35	7.57005	213.969	11.8626	20	1239
36	7.49518	214.729	11.7839	20	1274
37	8.04108	213.115	11.8637	20	1308
38	7.87526	213.506	12.0269	20	1341
39	7.91204	213.162	11.7905	20	1373
40	8.9902	213.09	11.1956	20	1387
41	8.08043	213.738	11.8456	20	1440
42	7.41443	213.621	12.1455	20	1473
43	7.61405	214.219	11.964	20	1505
44	8.08754	212.496	11.846	20	1536
45	7.2555	213.559	12.2318	20	1565
46	7.2967	212.944	12.2044	20	1598
47	7.02575	213.363	12.1673	20	1632
48	7.95259	213.231	11.6886	20	1665
49	7.303	214.045	12.0681	20	1696
50	7.47337	213.861	12.0666	20	1723
51	7.29357	213.135	12.2375	20	1752
52	7.067	212.591	11.9032	20	1784
53	6.85747	212.768	12.2921	20	1813
54	6.87589	212.777	12.3219	20	1844
55	6.84267	213.115	12.3351	20	1871
56	6.99606	213.813	12.2276	20	1900
57	6.76124	213.183	12.4259	20	1931
58	6.63296	214.575	11.6533	20	1962
59	2.98023e-08	221.883	10.4016	20	1974
60	2.98023e-08	221.933	10.3224	20	2005
61	2.98023e-08	222.47	10.3862	20	2034
62	2.98023e-08	222.375	10.715	20	2062
63	2.98023e-08	222.472	10.6419	20	2089
1	239.913	155.291	14.7396	21	20
2	239.33	155.939	14.718	21	54
3	238.94	158.776	13.3576	21	89
4	249.408	156.529	9.58305	21	105
5	254.842	172.463	6.12524	21	147
6	255.579	173.576	6.1068	21	179
7	255.944	174.325	6.08448	21	212
8	255.958	174.66	6.0637	21	241
9	256.034	175.15	6.12426	21	275
10	261.945	180.744	6.3157	21	312
11	262.048	181.607	6.31885	21	349
12	261.499	181.649	6.44917	21	388
13	261.582	181.72	6.5156	21	426
14	261.503	181.561	6.58881	21	461
15	261.812	181.316	6.81773	21	502
16	261.312	181.108	6.74827	21	542
17	261.282	181.139	6.85147	21	578
18	260.644	181.306	7.03407	21	619
19	260.525	181.582	7.09324	21	663
20	261.123	182.088	6.74828	21	705
21	261.084	181.785	6.66437	21	745
22	265.634	179.956	5.46322	21	781
24	253.382	161.66	4.24596	21	848
25	254.351	173.109	6.91031	21	892
26	257.712	179.758	7.11879	21	926
27	261.321	182.666	7.10134	21	958
28	262.351	182.407	6.72162	21	990
29	261.574	181.877	6.89843	21	1023
30	262.259	181.972	7.03542	21	1056
31	263.147	182.106	6.79746	21	1089
32	265.895	181.663	6.4521	21	1121
33	273.955	185.088	7.52964	21	1154
34	272.476	189.024	7.02715	21	1191
36	285.163	173.658	8.56643	21	1259
37	285.312	172.783	8.6445	21	1295
38	285.14	172.8	8.48915	21	1327
39	284.738	172.6	8.87096	21	1363
40	285.02	175.374	8.74399	21	1393
41	284.905	174.73	8.47756	21	1425
42	284.878	173.936	8.42269	21	1458
43	284.597	172.446	7.95742	21	1489
44	284.321	172.22	8.28639	21	1520
45	284.187	172.284	8.51056	21	1552
46	284.054	173.474	8.27102	21	1584
47	284.348	174.698	8.24651	21	1617
48	284.563	174.134	8.65016	21	1650
49	284.484	173.152	8.21234	21	1681
50	284.294	172.115	8.03095	21	1710
51	284.226	172.188	8.53082	21	1739
52	284.316	172.211	8.78242	21	1771
53	284.328	173.761	8.44604	21	1798
54	284.23	174.429	9.13211	21	1829
55	284.281	173.558	8.57677	21	1857
56	284.431	172.9	8.15676	21	1886
57	284.032	171.999	8.37923	21	1917
58	283.956	172.186	8.34836	21	1949
59	283.705	171.734	8.84903	21	1981
60	283.526	172.897	8.89299	21	2011
61	283.846	174.112	9.05449	21	2040
62	283.841	174.435	8.83672	21	2068
63	283.705	172.214	8.33473	21	2095
64	284.341	172.547	8.63026	21	2120
65	283.82	172.368	8.97919	21	2149
66	283.642	173.705	8.49264	21	2178
67	283.722	173.866	8.9379	21	2206
68	283.66	174.191	8.50373	21	2234
69	283.98	173.927	8.45684	21	2261
70	283.877	173.416	8.78156	21	2286
71	283.793	172.742	8.8787	21	2312
72	283.37	172.36	9.04635	21	2337
73	283.032	173.377	9.00925	21	2360
74	282.771	174.586	8.9314	21	2383
75	282.71	175.256	9.01206	21	2407
76	282.761	174.275	8.45854	21	2430
77	283.413	172.74	8.84874	21	2451
78	283.541	175.095	8.82294	21	2472
79	283.702	173.189	8.75168	21	2493
80	283.432	174.855	8.6194	21	2513
81	283.593	173.837	8.53865	21	2533
82	284.002	175.653	8.56654	21	2554
83	284.587	175.913	8.95269	21	2575
84	286.446	174.767	8.215	21	2596
85	285.892	173.688	8.55141	21	2617
86	283.819	173.216	8.9865	21	2638
87	283.458	173.98	8.66956	21	2658
88	284.273	177.669	8.6597	21	2679
89	284.001	176.236	8.27988	21	2702
90	283.796	174.126	8.175	21	2723
91	284.05	172.894	8.48322	21	2743
92	283.876	172.04	8.6267	21	2764
93	284.079	173.602	8.34429	21	2787
94	283.9	174.633	8.15593	21	2811
95	283.829	177.044	8.32635	21	2835
96	283.591	174.901	8.20204	21	2859
97	283.2	172.938	8.52911	21	2884
98	283.332	171.946	8.73955	21	2909
99	283.549	172.153	8.86922	21	2935
100	283.202	172.906	8.75971	21	2963
101	283.005	174.52	8.58304	21	2990
102	283.122	174.153	9.3879	21	3018
103	282.968	171.861	9.51588	21	3045
104	282.712	173.629	8.99679	21	3075
105	282.615	175.552	8.50315	21	3102
106	282.983	176.526	8.64204	21	3130
107	284.576	174.838	8.8483	21	3154
108	282.387	172.249	9.44236	21	3181
109	282.32	171.775	9.52843	21	3208
110	282.33	174.407	8.86007	21	3237
111	282.308	176.887	8.84711	21	3264
112	282.292	172.503	9.1964	21	3291
113	282.447	172.119	9.66953	21	3321
114	282.63	172.726	9.32642	21	3350
115	282.844	174.734	8.98157	21	3380
116	282.806	175.008	9.48428	21	3408
117	281.734	177.215	8.66328	21	3437
118	273.238	172.542	7.29113	21	3465
1	388.91	95.5221	12.335	22	21
2	388.689	94.9495	11.8298	22	55
3	388.667	95.0026	11.9258	22	90
4	388.598	95.6535	11.9773	22	124
5	390.032	95.4973	12.1894	22	158
6	391.237	92.9969	10.6058	22	180
1	368.633	200.113	12.9463	23	22
2	366.717	199.611	12.4672	23	56
3	363.092	201.14	12.6019	23	91
4	363.908	201.031	12.7907	23	125
5	366.547	200.222	12.6206	23	159
6	363.401	202.597	11.3628	23	192
7	360.354	203.377	9.33622	23	213
8	357.435	202.859	8.75181	23	242
9	356.721	202.469	8.98709	23	276
10	354.516	201.721	8.43283	23	313
11	354.879	201.57	8.39606	23	350
12	342.075	191.24	5.10921	23	387
1	507.934	18.1458	16.422	24	23
2	507.934	17.9398	16.4313	24	57
3	507.934	18.7752	16.4421	24	92
4	507.934	18.3251	16.4242	24	126
5	507.934	18.8545	15.3796	24	160
6	507.934	18.1769	17.0361	24	193
7	507.934	17.7979	16.6214	24	227
8	507.934	17.6946	16.7401	24	256
9	507.934	18.6875	16.0158	24	288
10	506.981	19.0992	16.5505	24	325
11	507.203	18.861	16.5538	24	365
12	506.772	18.8092	16.6554	24	403
13	507.934	16.9773	16.4821	24	441
14	505.969	15.3466	17.6544	24	479
15	506.296	17.9763	17.1546	24	518
16	506.522	17.9264	16.5482	24	558
17	507.011	17.759	16.8947	24	597
18	506.755	18.6266	16.6187	24	639
19	507.146	17.3116	16.8411	24	682
20	506.627	18.2528	16.8903	24	720
21	506.088	18.1287	16.9848	24	759
22	506.485	18.1823	16.686	24	799
23	506.106	18.693	16.4775	24	835
24	506.168	18.6666	16.5234	24	870
25	507.934	18.1224	16.6592	24	907
26	507.413	18.354	16.9723	24	939
27	506.66	18.6312	15.9246	24	971
28	506.242	18.6318	16.8285	24	1007
29	506.557	18.9947	16.5488	24	1038
30	506.681	19.2737	16.7982	24	1073
31	507.934	19.0864	16.4532	24	1106
32	507.934	18.8113	16.6429	24	1140
33	506.314	19.5613	16.8127	24	1175
34	507.934	18.9092	16.2204	24	1208
35	507.934	18.8227	16.1209	24	1241
36	507.934	19.2509	15.7306	24	1276
37	507.934	19.4107	16.219	24	1310
38	507.934	19.5798	16.0622	24	1344
39	507.934	18.8662	16.3329	24	1376
40	507.934	18.6491	15.7907	24	1409
41	507.934	18.9917	15.7327	24	1442
42	505.813	19.6465	15.663	24	1474
43	507.934	19.4552	15.8544	24	1506
44	507.934	18.9952	16.1528	24	1538
45	507.934	19.3889	16.1205	24	1568
46	507.934	17.9454	16.043	24	1600
47	507.934	18.552	15.6946	24	1633
48	504.4	18.9184	16.2891	24	1668
49	507.934	18.3801	16.0155	24	1698
50	507.934	19.5121	15.7209	24	1725
51	506.57	19.1882	16.0894	24	1754
52	504.01	19.2637	15.4801	24	1786
1	247.585	266.279	15.1572	25	24
2	248.247	266.439	14.7339	25	58
3	248.444	266.426	14.3267	25	93
4	247.296	266.041	15.0914	25	128
5	247.021	266.066	15.0354	25	162
6	246.602	265.498	14.2904	25	195
7	247.504	265.794	13.4724	25	228
8	246.914	265.559	14.6866	25	257
9	247.504	265.938	14.2533	25	291
10	248.1	266.492	14.6856	25	328
11	246.453	265.792	14.6985	25	367
12	246.245	265.485	14.2664	25	405
13	246.468	265.051	13.6964	25	442
14	247.171	265.62	13.2061	25	480
15	246.908	265.224	14.8409	25	519
16	247.293	265.645	14.4253	25	559
17	247.143	265.776	14.2211	25	599
18	246.062	265.492	14.5706	25	642
19	245.686	265.382	14.2333	25	684
20	246.329	265.844	13.5483	25	723
21	247.516	266.246	13.561	25	762
22	247.518	265.879	14.3718	25	801
23	247.655	266.386	13.9037	25	837
24	246.946	266.459	13.9755	25	873
25	246.171	266.625	14.9467	25	908
26	245.786	266.219	14.0409	25	941
27	245.948	266.449	14.8109	25	974
28	246.73	267.361	14.7636	25	1008
29	248.561	270.534	14.5405	25	1039
30	248.912	270.912	14.7734	25	1074
31	247.837	270.034	15.0614	25	1107
32	246.282	269.375	14.5679	25	1141
33	246.789	270.166	14.9803	25	1177
34	248.022	270.976	14.6937	25	1211
35	248.184	271.241	15.1433	25	1244
36	249.307	271.824	14.5479	25	1278
37	248.928	271.162	14.9055	25	1313
38	247.365	269	14.9609	25	1346
39	246.252	266.755	14.1437	25	1378
40	247.66	266.71	13.4629	25	1410
41	248.161	266.894	12.8609	25	1443
42	247.298	266.677	14.542	25	1475
43	247.324	266.712	13.7284	25	1507
44	247.407	266.482	14.5184	25	1539
45	246.475	266.228	14.6025	25	1570
46	246.606	265.974	12.9605	25	1602
47	247.123	266.076	12.9063	25	1635
48	247.703	266.618	13.4163	25	1669
49	247.489	266.362	13.5902	25	1699
50	247.54	266.474	13.8729	25	1728
51	246.843	266.048	14.17	25	1756
52	244.775	265.303	13.2241	25	1787
53	246.119	265.583	13.2396	25	1815
54	247.161	265.975	12.7337	25	1845
55	248.214	266.561	12.9727	25	1873
56	246.898	265.748	12.988	25	1903
57	247.509	266.444	14.21	25	1933
58	245.939	265.711	14.655	25	1965
59	245.468	265.794	13.5638	25	1994
60	246.115	266.061	13.136	25	2023
61	246.984	265.946	13.4934	25	2052
62	248.459	267.191	13.8966	25	2081
63	247.253	266.538	14.2283	25	2107
64	246.016	265.852	14.3835	25	2135
65	245.455	265.863	14.3445	25	2165
66	245.713	265.717	13.4332	25	2191
67	246.086	266.043	13.1553	25	2218
68	246.011	266.172	14.4066	25	2248
69	246.77	266.471	13.8649	25	2273
70	247.381	267.324	14.3999	25	2297
71	245.951	266.029	14.6149	25	2323
72	245.61	266.108	14.1651	25	2348
73	245.634	266.143	13.3823	25	2369
74	246.705	266.389	13.1497	25	2392
75	244.924	266.096	13.5265	25	2418
76	247.285	267.216	13.6818	25	2439
77	244.984	266.212	13.3863	25	2461
78	246.514	267.386	13.961	25	2482
79	246.036	266.776	12.9072	25	2502
80	244.564	265.979	13.3608	25	2523
81	247.548	267.601	14.1299	25	2544
82	245.872	266.958	14.0022	25	2565
83	244.365	266.137	13.0394	25	2586
84	245.943	266.567	13.3375	25	2607
85	246.705	266.922	13.1922	25	2628
86	248.131	268.088	14.1453	25	2646
87	246.547	267.055	13.1569	25	2667
88	245.019	266.386	13.269	25	2689
[truncated: 3,894 more rows]
