# Supplementary material for: Functional visualization of NK cell-mediated killing of metastatic single tumor cells
Source: eLife journal article supplement (doi:10.7554/elife.76269), 2022-02-03
Supplement: supp [file nk_neg_3.xlsx]

## Sheet: Sheet1
1	47.8029	27.1924	2.5	1	0
2	47.8255	24.3259	2.5	1	42
3	47.1538	26.1045	2.5	1	85
4	44.8161	27.1158	2.5	1	127
1	105.739	87.3248	2.5	2	1
2	106.832	82.7236	2.5	2	43
3	105.91	85.4438	2.5	2	86
4	105.789	87.1417	2.5	2	128
5	105.142	87.5109	2.5	2	170
6	105.145	87.3807	2.5	2	212
7	105.175	85.3793	2.5	2	250
8	105.735	82.7337	2.5	2	290
9	105.438	83.8343	2.5	2	329
10	105.224	84.71	2.5	2	371
11	104.686	86.978	2.5	2	414
12	104.659	86.5219	2.5	2	455
13	104.66	85.5186	2.5	2	493
14	104.643	84.0484	2.5	2	528
15	105.402	81.7798	2.5	2	562
16	105.02	82.9107	2.5	2	592
17	104.441	85.1666	2.5	2	623
18	104.361	85.7588	2.5	2	657
19	103.817	86.0705	2.5	2	693
20	103.692	85.3678	2.5	2	726
21	103.999	84.715	4.32029	2	763
22	104.069	84.5319	4.69373	2	793
23	104.407	83.3879	2.5	2	827
24	104.847	83.6996	4.62713	2	869
25	104.946	83.9613	4.74409	2	906
26	104.611	85.235	4.4731	2	945
27	104.647	85.5903	5.29761	2	985
28	104.4	85.8028	6.02504	2	1019
29	104.825	83.8851	5.42985	2	1054
30	104.778	84.1997	5.94984	2	1083
31	105.607	83.3847	6.16145	2	1112
32	105.087	84.488	5.8577	2	1138
33	105.646	83.9313	6.86762	2	1169
34	105.534	84.7221	6.65547	2	1203
35	105.73	85.527	6.55062	2	1236
36	105.652	86.3212	6.73642	2	1264
37	106.383	85.3106	7.18385	2	1296
38	106.735	83.4486	6.6822	2	1330
39	107.498	82.7866	6.99905	2	1364
40	106.345	85.506	6.74188	2	1395
41	106.115	86.2032	6.94734	2	1429
42	106.15	85.9002	7.10766	2	1462
43	106.276	85.7309	7.53944	2	1489
44	107.073	82.6089	7.42491	2	1518
45	106.875	83.2866	6.96077	2	1550
46	107.108	82.6256	7.49617	2	1581
47	107.259	81.9458	7.75487	2	1608
48	107.898	80.2162	7.59571	2	1641
49	106.355	85.1991	7.8624	2	1679
50	107.004	83.2224	7.88233	2	1713
51	106.482	85.234	8.03806	2	1749
52	106.232	85.5126	8.36609	2	1785
53	107.145	81.7475	8.0311	2	1819
54	106.2	82.51	8.21145	2	1860
55	106.805	80.2121	8.41047	2	1904
56	106.558	81.6289	8.56517	2	1948
57	105.817	83.564	8.72311	2	1994
58	105.415	85.9577	7.7299	2	2037
59	105.362	85.1692	8.8184	2	2077
60	106.901	80.2225	9.29497	2	2113
61	106.683	81.0649	9.3037	2	2147
62	106.747	80.2766	9.50971	2	2181
63	107.021	81.7975	9.42422	2	2217
64	106.534	83.3385	9.6261	2	2259
65	106.618	82.9684	9.43458	2	2300
66	105.765	85.8727	9.30724	2	2341
67	106.105	84.3361	9.86649	2	2385
68	106.797	82.1469	10.2264	2	2426
69	107.622	80.144	10.194	2	2469
70	106.926	82.5509	10.3108	2	2513
71	106.914	83.6727	10.4966	2	2557
72	106.367	85.8858	10.1465	2	2602
73	106.671	84.5449	11.0353	2	2643
74	107.912	82.1474	9.9468	2	2686
75	108.47	81.5541	10.6881	2	2731
76	108.565	80.7628	11.0468	2	2775
77	108.14	82.9309	10.8251	2	2817
78	108.33	83.6236	11.0836	2	2856
79	107.815	85.5937	10.7619	2	2896
80	107.569	85.631	11.3257	2	2949
81	108.105	84.2998	11.2393	2	2972
82	108.202	83.1729	11.6835	2	3019
83	108.89	81.0361	11.5415	2	3055
84	108.76	81.7171	11.8063	2	3095
85	108.435	83.4105	11.84	2	3139
86	108.162	84.5455	11.6136	2	3182
87	107.698	84.3096	11.6722	2	3229
88	107.876	83.0277	11.6568	2	3269
89	108.208	81.3533	11.8621	2	3309
90	108.374	79.9947	12.0647	2	3352
91	107.906	81.2037	12.1817	2	3396
92	107.346	83.1334	12.0401	2	3443
93	106.449	85.0674	11.8838	2	3480
94	106.618	84.4931	12.2459	2	3512
95	106.6	83.4693	12.3828	2	3544
96	106.978	81.0464	12.491	2	3579
97	107.373	81.3512	12.545	2	3616
98	108.228	80.6385	12.8072	2	3653
99	107.86	81.7844	13.0964	2	3692
100	107.016	83.8891	13.1128	2	3732
101	107.273	82.0248	13.1144	2	3774
102	107.619	81.8035	12.9785	2	3814
103	107.505	80.5998	13.246	2	3844
104	107.515	80.3219	13.4118	2	3878
105	107.729	81.118	13.3918	2	3915
106	107.27	83.8081	13.3711	2	3954
107	106.899	84.8552	13.641	2	3992
108	107.338	83.7356	13.6705	2	4028
109	107.492	83.478	13.6444	2	4065
110	107.711	81.8515	13.9258	2	4110
111	108.299	80.3504	13.9887	2	4149
112	108.659	81.578	14.2039	2	4187
113	108.355	83.0921	14.1631	2	4224
114	107.929	84.6454	13.5343	2	4261
115	108.319	83.72	13.9959	2	4304
116	108.277	83.0483	14.4817	2	4340
117	108.679	80.8948	14.2385	2	4379
118	108.673	80.7421	14.2581	2	4416
119	108.79	82.4981	14.1875	2	4450
120	108.595	84.3574	13.7954	2	4485
121	108.177	85.1333	14.2018	2	4519
122	108.552	83.8036	13.9886	2	4550
123	108.448	81.3766	14.4317	2	4582
124	108.723	80.7519	14.4003	2	4614
125	109	80.9601	14.7514	2	4648
126	108.796	82.7068	14.7916	2	4680
127	108.354	83.4398	14.6964	2	4713
128	108.663	80.8912	14.8297	2	4748
129	108.203	82.0767	14.5404	2	4786
130	108.117	80.9635	15.1186	2	4820
131	108.611	78.8146	15.4034	2	4855
132	108.334	80.9321	15.3166	2	4892
133	108.527	80.6879	15.7703	2	4933
134	107.731	82.6024	15.6167	2	4976
135	107.549	83.0039	15.5298	2	5011
136	107.659	81.1559	15.0414	2	5043
137	108.637	78.7363	15.6894	2	5077
138	108.648	78.2156	16.1128	2	5114
139	108.671	78.7325	16.4563	2	5159
140	108.2	81.4435	16.3344	2	5198
141	107.564	83.4699	16.1387	2	5228
142	107.672	83.3639	15.9621	2	5261
143	107.341	82.9805	16.7179	2	5299
144	107.909	80.3963	16.5501	2	5336
145	107.595	83.4548	16.0744	2	5377
146	108.465	80.6161	16.7183	2	5422
147	107.842	83.6258	16.6258	2	5466
148	107.741	83.9037	16.5285	2	5510
149	109.047	80.6221	16.8594	2	5556
150	109.078	79.1577	17.0889	2	5599
151	109.353	79.1995	16.9621	2	5646
152	109.518	80.0593	17.1478	2	5691
153	108.99	83.4246	16.9633	2	5737
154	108.478	84.4185	16.8879	2	5777
155	108.483	83.9226	16.8034	2	5815
156	108.607	82.5989	17.3428	2	5852
157	108.959	80.8907	17.2276	2	5889
158	109.37	80.0305	17.208	2	5924
159	109.136	82.1981	17.2628	2	5961
160	108.834	83.6788	17.3672	2	5999
161	108.746	83.5286	17.1055	2	6041
162	108.911	81.9781	17.3289	2	6078
163	108.998	80.6359	17.5873	2	6120
164	109.635	78.0609	17.6918	2	6158
165	109.526	78.955	17.6894	2	6194
166	109.168	80.6622	17.8267	2	6229
167	108.589	81.0741	17.732	2	6260
1	28.0662	89.7806	2.5	3	2
2	29.5593	85.1707	2.5	3	44
3	27.9752	88.1486	2.5	3	87
4	27.8545	89.8341	2.5	3	129
5	27.7633	90.2073	2.5	3	171
6	27.8825	89.8034	2.5	3	213
7	27.7421	87.4588	2.5	3	251
8	29.1051	84.8171	2.5	3	291
9	28.7839	85.0159	2.5	3	330
10	27.7779	87.7042	2.5	3	372
11	27.2381	89.324	2.5	3	415
12	26.9257	89.1204	2.5	3	456
13	27.1645	88.1286	2.5	3	494
14	27.8378	86.27	2.5	3	529
15	28.8566	84.14	2.5	3	563
16	27.8057	85.7809	2.5	3	593
17	27.5746	87.4744	2.5	3	624
18	26.118	88.8454	2.5	3	658
19	26.2592	88.1426	2.5	3	694
20	26.9948	87.0748	2.5	3	727
21	27.8139	85.0168	2.5	3	760
22	27.9838	84.1294	2.5	3	790
23	26.6677	85.662	2.5	3	828
24	27.2329	86.3609	2.5	3	865
25	26.9219	88.1459	2.5	3	904
26	26.7467	87.7164	2.5	3	942
27	27.7792	86.9521	2.5	3	981
28	27.3143	87.4668	5.00221	3	1020
29	28.5308	84.7263	2.5	3	1051
30	28.0075	85.7274	4.14645	3	1084
31	28.5059	85.8988	4.93726	3	1113
32	28.0204	87.2916	4.59473	3	1139
33	27.8584	88.0631	4.64327	3	1167
34	27.2731	88.6763	5.46991	3	1201
35	28.8514	87.1595	5.46615	3	1233
36	29.133	86.1632	4.90716	3	1261
37	29.7996	85.1613	5.2124	3	1293
38	29.497	86.2365	5.62946	3	1326
39	29.2242	87.3079	4.93465	3	1362
40	28.5794	88.8944	5.66888	3	1393
41	28.445	88.5967	6.0687	3	1427
42	29.1084	86.3172	4.90744	3	1459
43	29.3292	85.828	5.17911	3	1487
44	29.7289	87.4584	5.72547	3	1515
45	29.4307	86.92	5.5783	3	1547
46	29.0978	85.9555	6.71192	3	1582
47	29.0612	85.0351	6.61958	3	1609
48	30.8649	83.0152	6.60582	3	1642
1	51.8737	171.239	2.5	4	3
2	52.139	170.152	2.5	4	45
3	51.1798	171.893	2.5	4	88
4	50.8657	172.313	2.5	4	131
5	50.7876	171.787	2.5	4	173
6	50.872	169.583	2.5	4	215
7	51.5732	166.941	2.5	4	253
8	51.7545	167.836	2.5	4	293
9	51.1825	169.809	2.5	4	332
10	50.8481	171.32	2.5	4	374
11	50.4149	171.148	2.5	4	417
12	50.4472	170.045	2.5	4	459
13	51.1258	167.187	2.5	4	496
14	50.7652	166.676	2.5	4	531
15	50.2796	168.731	2.5	4	566
16	49.8443	170.103	2.5	4	595
17	49.6794	171.105	2.5	4	626
18	49.5678	170.806	2.5	4	660
19	49.8804	168.891	2.5	4	696
20	50.2183	166.18	2.5	4	729
21	50.6618	166.253	2.5	4	762
22	50.3737	167.86	2.5	4	792
23	49.9667	169.805	2.5	4	829
24	49.986	170.091	2.5	4	866
25	50.4137	169.285	2.5	4	905
26	50.7629	168.027	2.5	4	943
27	51.1595	165.87	2.5	4	982
28	50.9018	167.584	2.5	4	1017
29	51.9179	167.176	2.5	4	1052
30	51.2093	169.083	2.5	4	1080
31	50.966	169.899	2.5	4	1109
32	51.0363	170.095	2.5	4	1137
33	48.7462	168.721	4.94793	4	1168
34	48.215	169.828	6.56808	4	1206
35	49.3692	169.809	6.12718	4	1234
36	48.9501	172.573	8.08224	4	1266
37	44.7516	178.387	8.82612	4	1300
38	41.7805	194.387	14.0559	4	1349
1	221.435	237.458	2.5	5	4
2	220.86	238.588	2.5	5	46
3	220.436	238.686	2.5	5	89
4	220.637	238.36	2.5	5	132
1	64.1283	84.6868	9.85288	6	5
2	63.6709	84.7674	7.8974	6	47
3	64.8933	85.2988	7.7251	6	90
4	63.7526	82.8857	5.57037	6	133
5	63.3496	82.6517	5.56119	6	175
6	62.6656	83.462	4.99568	6	216
7	63.7992	83.0709	6.52492	6	257
8	63.4824	84.3401	6.6299	6	297
9	62.6192	83.2537	5.72436	6	334
10	62.8928	83.6305	6.80859	6	378
11	62.0788	81.8738	5.98054	6	419
12	60.8938	81.4383	5.99262	6	462
1	369.317	92.6582	2.5	7	6
2	369.816	89.8197	3.61264	7	48
3	369.393	90.7485	4.90406	7	92
4	369.363	92.1186	3.66919	7	134
5	369.398	91.742	4.84685	7	179
6	368.64	92.8547	2.5	7	220
7	368.642	91.6236	4.37355	7	263
8	368.774	92.7855	6.20433	7	303
9	368.545	91.0586	5.08012	7	342
10	368.161	90.2627	2.5	7	381
11	368.174	90.6272	5.47745	7	427
12	367.919	90.6849	5.21432	7	467
13	367.722	91.3796	4.62379	7	503
14	367.867	90.8876	6.4526	7	539
15	367.37	91.8089	6.45644	7	571
16	367.419	89.169	5.62359	7	602
17	367.396	91.0261	7.38248	7	635
18	367.125	89.0247	6.12729	7	669
19	367.176	89.9161	5.95264	7	701
20	367.005	89.0939	7.25431	7	734
21	366.786	90.8935	6.95559	7	767
22	366.816	91.2726	7.02482	7	799
23	367.181	88.1247	5.76476	7	836
24	367.676	90.5266	7.99692	7	874
25	367.712	87.7389	6.92536	7	914
26	367.785	87.0136	7.49258	7	950
27	367.742	88.752	7.90534	7	990
28	367.831	90.7244	7.59712	7	1026
29	368.115	91.0696	8.38237	7	1060
30	367.993	91.8752	8.63307	7	1090
31	368.298	91.1235	8.6303	7	1117
32	368.53	90.959	9.37576	7	1146
33	368.634	90.2238	8.98766	7	1177
34	368.358	89.3447	7.86887	7	1209
35	369.011	90.6774	7.80809	7	1242
36	369.465	90.2003	8.93007	7	1270
37	369.618	91.9576	8.99827	7	1303
38	369.851	89.6394	8.37881	7	1336
39	369.686	91.6889	9.87512	7	1373
40	369.481	89.7052	8.68088	7	1403
41	369.338	90.95	8.18345	7	1435
42	369.354	91.7226	9.21967	7	1468
43	369.815	91.6246	9.12642	7	1495
44	369.685	91.2821	10.1129	7	1525
45	369.664	91.5694	9.60919	7	1557
46	369.122	90.7777	9.75473	7	1588
47	369.501	89.7028	9.81325	7	1615
48	370.332	86.666	9.84314	7	1649
49	369.882	90.039	9.38466	7	1686
50	369.98	88.1612	9.67995	7	1720
51	369.819	90.7938	9.8657	7	1756
52	369.398	92.0007	9.53792	7	1792
53	369.244	88.3211	10.0904	7	1829
54	369.04	89.3699	10.2722	7	1870
55	369.015	85.6553	10.0788	7	1918
56	369.051	86.1356	10.3002	7	1962
57	369.148	87.9718	10.5565	7	2004
58	368.857	91.7204	10.1084	7	2046
59	368.687	91.5791	10.8339	7	2082
60	369.501	85.75	10.9569	7	2119
61	369.031	87.4531	10.8282	7	2154
62	369.29	85.3163	11.4652	7	2198
63	369.29	88.0008	11.0778	7	2222
64	369.536	88.1716	11.5875	7	2276
65	369.635	89.869	11.2506	7	2318
66	369.59	91.8698	11.539	7	2361
67	369.139	90.9132	11.4792	7	2405
68	368.705	88.7836	11.6432	7	2445
69	369.176	85.7393	11.5415	7	2491
70	369.559	86.3628	11.6996	7	2532
71	369.628	88.1809	11.9342	7	2576
72	369.393	90.7618	11.3361	7	2621
73	369.635	91.1863	12.3568	7	2661
74	370.26	89.6183	11.7641	7	2708
75	370.758	87.5395	12.5598	7	2749
76	370.606	85.526	12.4226	7	2791
77	370.377	87.0639	12.2894	7	2832
78	370.901	88.2501	12.4561	7	2869
79	370.522	91.4817	12.0911	7	2909
80	370.197	91.178	11.8951	7	2952
81	370.306	89.011	12.0202	7	2988
82	370.294	88.6445	12.6087	7	3024
83	370.735	86.248	12.5615	7	3062
84	370.8	86.7143	12.8137	7	3100
85	370.847	88.7567	13.0414	7	3144
86	370.6	90.625	12.7862	7	3188
87	370.114	91.2366	12.8962	7	3234
88	369.982	89.1444	12.3539	7	3274
89	369.881	87.5223	12.8972	7	3315
90	370.281	85.2891	13.0228	7	3358
91	370.133	85.9966	13.3107	7	3403
92	369.804	88.4322	13.5616	7	3450
93	369.42	90.3433	13.1426	7	3487
94	369.238	90.2364	13.6136	7	3520
95	369.27	88.8468	13.565	7	3552
96	369.255	87.6014	14.1869	7	3592
97	369.545	86.2038	13.6875	7	3626
98	370.414	85.4415	14.4824	7	3665
99	370.178	86.9156	14.5399	7	3705
100	369.685	89.4587	14.4383	7	3743
101	369.176	89.3513	14.5418	7	3785
102	369.416	88.9354	14.158	7	3825
103	369	86.3119	14.5108	7	3856
104	368.89	85.1394	14.4671	7	3890
105	369.042	86.0255	14.6989	7	3927
106	369.733	88.4206	14.7312	7	3967
107	369.884	90.0577	14.5848	7	4006
108	369.677	90.0975	14.7652	7	4040
109	369.816	89.5038	14.4865	7	4079
110	372.822	84.9006	22.5	7	4135
111	370.147	85.6424	15.1207	7	4157
112	370.573	86.8394	15.3514	7	4196
113	370.497	88.2636	15.0553	7	4234
114	370.717	90.5856	15.0493	7	4273
115	370.872	90.826	15.9184	7	4313
116	370.783	89.1658	15.5746	7	4351
117	370.573	86.6545	15.3131	7	4386
118	370.564	86.1362	15.5048	7	4424
119	371.015	87.3198	15.9101	7	4458
120	371.155	89.9071	15.7927	7	4493
121	371	91.216	15.5861	7	4527
122	371.102	90.5891	15.6254	7	4558
123	370.652	87.6144	15.9291	7	4590
124	370.602	86.7774	15.8953	7	4624
125	370.989	86.2389	16.4696	7	4657
126	371.325	88.2035	16.6172	7	4689
127	370.883	89.7822	16.1688	7	4720
128	370.951	87.6988	16.3838	7	4757
129	371.301	89.0638	17.1364	7	4794
130	371.054	88.8674	16.9429	7	4831
131	370.136	86.1568	16.9075	7	4867
132	370.607	86.4032	17.0916	7	4905
133	370.648	86.8999	17.33	7	4945
134	370.761	89.6297	17.1713	7	4986
135	370.325	90.2793	17.2619	7	5022
136	370.43	88.9343	17.1968	7	5055
137	370.556	85.8003	17.1127	7	5091
138	370.52	85.2305	17.6085	7	5129
139	370.585	85.2048	17.7401	7	5166
140	370.824	88.5378	17.7114	7	5205
141	370.623	90.1938	17.3182	7	5239
142	370.643	90.4148	18.0694	7	5271
143	370.515	89.7554	18.1813	7	5306
144	370.303	87.1001	18.3431	7	5345
145	370.683	89.1658	18.1967	7	5389
146	370.977	86.2898	18.5007	7	5429
147	371.071	89.7288	18.2387	7	5472
148	371.008	90.4788	17.9226	7	5516
149	371.703	87.0662	18.28	7	5562
150	371.45	85.6229	19.1258	7	5611
151	371.599	85.2489	18.85	7	5658
152	371.348	86.0519	18.5391	7	5701
153	371.8	89.5816	18.5392	7	5746
154	371.761	91.0402	18.2633	7	5784
155	371.679	90.7661	18.3619	7	5825
156	371.34	89.8465	19.3992	7	5862
157	371.525	87.9761	19.6294	7	5898
158	371.825	85.3303	19.3522	7	5932
159	372.459	87.4234	19.5787	7	5970
160	372.394	89.7621	19.3867	7	6010
161	372.282	90.4983	19.2168	7	6050
162	372.111	89.1925	19.567	7	6089
163	371.384	88.4451	19.9585	7	6132
164	371.557	84.4792	19.8418	7	6168
165	371.517	85.1125	19.6398	7	6204
166	371.52	86.3734	19.8263	7	6236
167	371.532	88.0646	19.7061	7	6267
1	446.373	143.291	2.5	8	7
2	446.53	132.036	2.5	8	49
3	445.137	130.968	2.5	8	91
4	443.685	129.054	2.5	8	135
5	451.318	129.23	2.5	8	178
6	433.864	148.996	2.5	8	222
7	452.359	145.786	2.5	8	262
8	454.202	147.604	2.5	8	301
9	454.525	149.738	2.5	8	340
10	455.87	152.643	2.5	8	382
11	455.405	152.718	2.5	8	424
12	454.344	151.526	2.5	8	465
13	453.253	148.006	2.5	8	501
14	452.943	146.244	2.5	8	535
15	454.833	148.738	2.5	8	568
16	454.676	150.289	2.5	8	599
17	454.67	151.883	2.5	8	632
18	454.681	151.804	2.5	8	666
19	453.243	150.038	2.5	8	700
20	453.397	147.652	2.5	8	733
21	454.02	145.805	2.5	8	766
22	453.639	147.908	2.5	8	797
23	454.016	149.609	2.5	8	835
24	454.074	150.104	2.5	8	873
25	454.515	150.534	2.5	8	913
26	454.13	149.223	2.5	8	949
27	454.471	149.078	3.73104	8	989
28	454.942	150.141	4.7809	8	1024
29	454.897	147.62	4.25914	8	1059
30	454.74	147.805	4.79994	8	1089
31	455.342	150.393	4.26593	8	1116
32	454.103	151.19	4.58131	8	1144
33	454.901	151.718	5.16102	8	1175
34	455.565	150.722	5.60466	8	1208
35	455.375	148.928	4.96635	8	1240
36	454.956	147	5.05398	8	1268
37	454.011	146.457	5.46813	8	1301
38	450.8	146.511	4.20548	8	1335
39	449.523	144.947	5.49365	8	1370
40	450.454	147.301	5.84187	8	1402
41	456.759	152.715	6.38787	8	1436
42	456.658	149.634	6.24322	8	1466
43	456.328	149.348	6.15135	8	1493
44	455.994	151.495	6.17604	8	1522
45	454.954	148.49	6.59726	8	1554
46	456.13	150.961	6.51492	8	1586
47	456.606	149.471	7.23276	8	1614
48	456.762	147.087	6.83153	8	1647
49	456.191	149.366	7.11714	8	1685
50	455.722	151.007	6.83919	8	1719
51	456.56	151.79	6.71386	8	1755
52	456.98	150.077	7.06814	8	1790
53	456.244	144.977	7.21154	8	1827
54	455.651	145.523	7.35834	8	1867
55	456.21	147.144	7.44254	8	1914
56	456.243	150.172	7.55045	8	1957
57	456.617	151.637	7.31695	8	2000
58	456.186	151.139	7.73162	8	2044
59	455.873	149.795	8.02112	8	2080
60	455.593	145.953	7.7683	8	2116
61	455.523	144.115	7.82012	8	2150
62	456.549	148.653	8.31877	8	2183
63	456.456	150.473	8.37211	8	2221
64	456.538	152.077	8.52703	8	2262
65	456.78	145.918	8.25759	8	2304
66	456.767	149.915	8.57803	8	2345
67	455.8	147.399	8.5294	8	2390
68	455.797	146.416	8.80603	8	2433
69	456.465	148.069	9.24457	8	2475
70	456.527	150.616	9.27803	8	2518
71	456.751	151.696	9.37997	8	2563
72	457.168	151.743	9.13779	8	2608
73	457.032	149.177	9.51984	8	2649
74	456.945	147.219	9.68139	8	2692
75	457.071	146.189	9.73305	8	2737
76	457.146	148.717	9.8088	8	2781
77	457.514	150.997	9.90442	8	2823
78	457.884	151.697	9.81172	8	2860
1	338.018	111.053	5.29628	9	8
2	337.583	113.115	4.79449	9	51
3	340.826	115.548	6.19318	9	93
4	338.587	113.419	5.49664	9	137
5	335.082	109.449	2.5	9	177
6	327.934	98.1784	2.5	9	221
7	320.63	81.5239	9.80951	9	265
1	454.926	53.0742	6.4361	10	9
2	453.336	64.2683	6.15198	10	50
1	499.821	249.411	7.22432	11	10
2	499.993	250.233	7.37363	11	53
3	499.736	249.55	7.1613	11	95
4	499.884	247.161	7.31335	11	138
5	498.893	251.676	7.49113	11	181
1	296.391	9.46766	9.86259	12	11
2	296.431	7.74729	9.95137	12	54
3	295.639	9.23541	10.3117	12	96
4	295.956	6.30625	12.1074	12	156
5	295.954	7.71018	11.9975	12	200
6	291.687	2.98023e-08	17.6399	12	241
7	295.91	9.0725	12.1672	12	280
8	293.823	2.98023e-08	16.0562	12	319
1	309.576	23.3856	11.2891	13	12
2	308.46	25.207	11.9159	13	73
3	308.873	24.8025	11.7044	13	115
4	310.593	27.6287	13.4939	13	157
5	309.725	26.1342	12.5081	13	201
1	439.479	120.21	9.42982	14	13
2	433.492	121.783	10.1156	14	55
3	429.695	121.59	11.761	14	116
1	428.381	138.477	11.1545	15	14
2	426.443	137.401	8.24771	15	52
3	426.354	141.97	7.31148	15	94
4	429.198	122.247	11.6761	15	158
5	446.998	102.104	10.2825	15	182
6	446.667	101.533	9.83164	15	224
7	446.068	101.304	8.58253	15	264
8	446.604	107.873	6.21918	15	304
9	445.676	101.17	9.89104	15	344
10	446.186	101.316	9.82731	15	386
11	446.396	101.879	9.92031	15	429
12	444.691	102.447	10.8789	15	469
13	444.933	102.88	7.62941	15	505
14	442.893	103.746	12.8183	15	552
1	147.74	340.147	2.5	16	15
2	145.726	347.232	2.5	16	56
3	145.214	347.474	2.5	16	98
1	223.008	367.43	2.5	17	16
2	222.934	371.842	2.5	17	57
3	222.648	371.199	2.5	17	99
4	222.435	368.756	2.5	17	140
5	222.63	368.529	2.5	17	183
6	222.519	369.682	2.5	17	226
7	222.035	371.302	2.5	17	266
8	222.156	371.684	2.5	17	306
9	221.81	371.672	2.5	17	346
10	221.318	371.202	4.54817	17	388
11	221.318	371.363	5.79644	17	431
12	221.458	368.824	2.5	17	470
13	221.333	369.736	2.5	17	507
14	219.898	370.424	5.64678	17	542
15	220.475	370.372	5.10795	17	574
16	221.309	370.225	4.28615	17	605
17	221.094	370.179	5.2701	17	639
18	220.497	371.102	6.68078	17	673
19	220.188	369.949	5.85976	17	705
20	220.107	370.54	7.11195	17	738
21	219.537	369.623	6.56359	17	770
22	219.773	368.926	6.50595	17	804
23	220.277	369.052	6.63217	17	841
24	221.012	369.991	6.93351	17	880
25	221.044	370.582	6.97298	17	920
26	219.764	371.76	7.82503	17	958
27	221.436	369.832	7.32856	17	998
28	221.584	369.403	5.72389	17	1032
29	221.566	368.773	7.07463	17	1063
30	221.935	369.128	7.02055	17	1094
31	222.211	369.998	7.04777	17	1121
32	221.573	371.033	7.65139	17	1149
33	221.569	371.211	8.01973	17	1180
34	222.208	369.915	7.58932	17	1214
35	222.219	368.781	6.86401	17	1244
36	221.025	370.682	8.91729	17	1273
37	223.06	369.654	7.38974	17	1306
38	223.12	370.327	7.39682	17	1341
39	222.515	371.371	8.82008	17	1376
40	222.305	372.324	9.05594	17	1408
41	222.317	370.299	8.05262	17	1440
42	222.476	370.033	8.83904	17	1470
43	221.916	370.211	8.79298	17	1499
44	222.358	372.021	8.68907	17	1526
45	222.689	370.935	8.3682	17	1559
46	222.587	370.991	8.60485	17	1589
47	222.19	371.493	9.22323	17	1620
48	219.301	374.402	10.6725	17	1654
49	221.992	370.078	9.79287	17	1690
50	222.303	370.125	9.42874	17	1724
51	222.954	367.171	8.82442	17	1761
52	223.139	366.398	9.28318	17	1797
53	221.938	371.385	9.43964	17	1834
54	221.06	371.368	9.98852	17	1875
55	219.908	372.546	14.0566	17	1936
56	222.293	370.04	9.13111	17	1965
57	221.092	370.561	10.9479	17	2009
58	221.291	367.534	10.985	17	2053
59	222.324	366.138	10.3195	17	2088
60	222.218	370.129	9.95333	17	2124
61	221.683	370.591	10.3107	17	2158
62	221.796	369.686	9.20474	17	2190
63	221.984	368.767	10.5721	17	2226
64	221.147	369.43	11.376	17	2282
65	221.036	370.09	11.6365	17	2323
66	221.911	366.787	11.7631	17	2366
67	221.124	369.652	11.5571	17	2409
68	221.411	371.427	11.3794	17	2450
69	220.4	373.204	12.1224	17	2497
70	221.608	371.756	11.9476	17	2539
71	222.001	370.17	12.0272	17	2584
72	221.927	367.71	12.2407	17	2625
73	221.086	368.716	13.0504	17	2668
74	223.871	368.698	11.9362	17	2713
75	224.091	371.103	11.6359	17	2754
76	222.777	372.324	12.0607	17	2796
77	223.306	370.141	11.7209	17	2837
78	223.042	369.549	12.2576	17	2877
79	224.472	367.039	12.2032	17	2916
80	224.033	367.771	12.463	17	2957
81	224.151	369.468	12.4351	17	2994
82	223.816	371.835	12.9887	17	3032
83	223.571	372.389	12.8625	17	3068
84	223.192	371.648	12.5261	17	3107
85	223.147	370.633	13.6792	17	3151
86	222.54	368.823	14.0398	17	3197
87	222.086	368.612	12.8487	17	3242
88	222.729	370.167	13.6014	17	3284
89	221.802	371.877	13.3515	17	3322
90	223.472	370.751	13.064	17	3363
91	223.557	369.461	12.6354	17	3410
92	223.307	368.13	13.111	17	3456
93	223.487	366.161	13.0988	17	3492
94	223.589	366.762	13.2558	17	3525
95	223.152	368.656	13.533	17	3558
96	222.867	370.151	13.2012	17	3596
97	223.422	367.275	12.6544	17	3634
98	223.677	369.53	13.7187	17	3668
99	222.171	367.831	14.699	17	3709
100	222.515	366.77	14.2684	17	3749
101	220.613	369.279	15.449	17	3790
102	220.112	369.569	16.4949	17	3830
103	222.654	370.486	14.7676	17	3863
104	221.246	371.735	15.343	17	3896
105	223.468	369.424	14.2917	17	3934
106	223.443	367.879	14.5285	17	3974
107	223.617	366.786	14.5323	17	4011
108	223.767	367.885	14.6074	17	4044
109	223.989	368.563	14.5739	17	4084
110	224.32	369.906	14.3385	17	4123
111	224.344	370.212	14.5618	17	4164
112	223.09	369.103	14.6157	17	4204
113	224.149	367.728	15.0684	17	4242
114	224.583	366.425	14.9808	17	4279
115	224.687	367.323	15.023	17	4319
116	224.749	369.545	14.9973	17	4357
117	224.779	370.478	14.7627	17	4393
118	224.713	370.415	15.0546	17	4430
119	224.71	369.657	15.1766	17	4465
120	224.429	368.006	15.0937	17	4499
121	224.494	366.869	15.3834	17	4533
122	224.944	367.939	15.4253	17	4564
123	225.158	370.09	14.9015	17	4597
124	224.97	370.1	15.1673	17	4630
125	224.729	369.344	15.8664	17	4662
126	224.875	366.818	15.3993	17	4693
127	224.571	366.277	15.714	17	4725
128	224.263	369.811	16.1643	17	4762
129	221.903	369.352	16.3931	17	4798
130	221.426	370.942	17.112	17	4834
131	222.648	371.277	16.4924	17	4870
132	221.045	371.029	17.1561	17	4909
133	223.209	369.398	16.9791	17	4948
134	223.275	366.847	16.7173	17	4990
135	223.449	366.47	17.0819	17	5026
136	223.247	368.226	17.1263	17	5059
137	223.465	370.065	17.0671	17	5095
138	223.497	370.199	16.9955	17	5133
139	221.535	371.306	18.5153	17	5170
140	223.54	367.432	17.667	17	5208
141	223.423	366.49	17.614	17	5241
142	223.603	366.723	17.6075	17	5274
143	221.29	369.335	18.0823	17	5309
144	224.065	370.341	16.9735	17	5348
1	130.24	403.428	2.5	18	17
2	129.708	407.381	2.5	18	58
3	130.669	406.796	2.5	18	100
4	130.207	404.38	2.5	18	141
5	128.158	403.72	2.5	18	184
6	127.453	404.511	2.5	18	227
7	127.175	406.046	2.5	18	267
8	128.732	406.99	2.5	18	307
9	127.67	405.46	2.5	18	347
10	127.287	403.448	2.5	18	387
11	128.332	402.513	2.5	18	430
12	129.841	405.683	2.5	18	471
13	147.039	405.935	2.5	18	508
14	151.413	402.63	2.5	18	541
15	153.848	401.838	2.5	18	573
16	152.997	400.351	4.15528	18	606
17	153.225	399.04	3.78177	18	637
18	152.396	401.753	5.15095	18	671
19	151.376	402.177	7.84668	18	706
20	151.283	401.691	8.42077	18	739
21	150.754	401.351	8.87588	18	772
22	152.447	402.47	5.64792	18	803
1	150.915	329.928	9.44898	19	18
2	150.3	333.167	10.0948	19	60
3	149.803	332.589	10.2129	19	101
4	150.127	331.182	9.33335	19	142
5	149.99	334.051	9.58988	19	185
6	150.14	330.791	9.59746	19	228
7	149.806	331.74	10.2287	19	268
8	150.025	330.588	10.1199	19	309
9	149.685	331.18	10.3621	19	350
10	149.464	333.318	10.068	19	391
11	149.284	332.091	10.1658	19	434
12	149.103	330.558	10.4922	19	474
13	149.159	328.343	10.5213	19	512
14	149.219	328.696	10.4534	19	545
15	149.179	327.894	10.5604	19	577
16	149.168	328.446	10.6756	19	608
17	148.655	329.299	10.3739	19	641
18	148.226	328.432	11.5117	19	681
19	148.018	328.427	11.6461	19	714
20	148.739	326.268	11.2079	19	740
21	148.804	327.484	10.9275	19	771
22	148.439	328.409	11.6297	19	814
23	148.456	329.512	11.8125	19	851
24	148.623	331.56	12.3009	19	892
25	148.61	329.264	12.8044	19	932
26	148.662	328.685	11.8451	19	971
27	149.075	326.746	12.3942	19	1010
28	148.811	328.944	12.9521	19	1043
29	148.903	331.356	12.8278	19	1074
30	148.903	329.584	12.7467	19	1100
31	148.919	331.591	13.0104	19	1129
32	148.787	336.099	12.7969	19	1157
33	148.813	341.599	12.3466	19	1188
34	149.023	343.607	13.0863	19	1219
35	147.376	340.444	13.6914	19	1250
1	45.8762	493.129	9.71945	20	19
2	44.7022	493.076	9.7661	20	61
3	44.9299	493.305	9.69111	20	103
4	48.9022	491.971	9.74317	20	144
5	51.0422	491.059	10.5133	20	187
6	51.4009	491.226	10.6745	20	230
7	51.148	490.83	10.7936	20	269
8	51.7646	490.167	10.8848	20	310
9	56.6628	489.438	15.6454	20	360
10	55.7065	489.77	15.3793	20	402
11	52.6749	488.125	13.2725	20	445
12	55.6369	488.736	15.8314	20	483
13	53.4082	489.526	4.82225	20	509
1	411.183	280.559	2.5	21	20
2	410.978	283.427	4.94041	21	66
3	410.786	284.676	4.19353	21	107
4	411.168	284.565	2.5	21	145
5	410.682	284.93	5.35006	21	192
6	410.561	283.858	5.50132	21	235
7	410.314	282.974	4.42128	21	273
8	410.246	282.681	5.25907	21	314
9	410.203	283.256	4.97949	21	354
10	410.368	283.576	5.0131	21	395
11	410.051	283.891	5.16843	21	438
12	409.801	283.616	6.50564	21	478
13	407.948	274.5	6.47014	21	516
14	407.262	271.793	4.84556	21	548
15	407.4	272.709	6.26609	21	580
16	406.994	271.95	5.00188	21	612
17	406.908	272.281	6.85782	21	645
18	406.693	273.899	7.73917	21	678
19	406.776	274.496	8.248	21	710
1	443.654	302.32	2.5	22	21
2	443.937	306.733	2.5	22	63
3	443.514	306.596	2.5	22	104
4	443.906	303.984	2.5	22	146
5	443.778	300.97	2.5	22	188
6	443.042	301.316	2.5	22	231
7	443.07	303.387	2.5	22	270
8	443.124	305.217	2.5	22	311
9	442.743	305.792	2.5	22	351
10	442.359	305.648	2.5	22	392
11	442.033	302.886	2.5	22	435
12	441.957	300.116	2.5	22	475
13	441.76	301.582	2.5	22	513
14	441.717	303.458	2.5	22	546
15	441.738	305.033	2.5	22	579
16	441.989	304.237	2.5	22	610
17	441.539	303.444	2.5	22	643
18	441.437	300.667	2.5	22	675
19	441.374	299.576	2.5	22	708
20	441.112	301.851	2.5	22	742
21	440.618	302.957	2.5	22	774
22	440.904	303.714	2.5	22	807
23	441.734	303.414	2.5	22	844
24	442.096	302.376	2.5	22	883
25	441.902	300.023	2.5	22	922
26	441.718	302.018	3.40326	22	960
27	441.488	301.634	2.5	22	1000
28	442.054	300.664	4.67322	22	1035
29	441.939	304.604	2.5	22	1066
30	441.971	304.382	4.53228	22	1097
31	441.599	304.72	4.66181	22	1124
32	441.502	304.441	5.19534	22	1151
33	441.287	303.01	4.81231	22	1182
34	442.234	300.417	4.85141	22	1216
35	442.642	301.363	5.33506	22	1247
36	441.755	305.165	2.5	22	1275
37	442.384	304.87	5.17424	22	1308
38	442.568	305.12	5.59269	22	1344
39	442.595	304.232	5.55877	22	1378
40	441.987	301.681	5.17141	22	1410
41	441.799	302.156	5.46062	22	1443
42	441.933	304.472	5.48744	22	1472
43	442.168	304.382	5.44567	22	1501
44	442.704	304.148	6.04506	22	1529
45	442.696	304.746	6.09034	22	1561
46	442.746	303.337	5.82054	22	1592
47	442.881	304.664	6.44179	22	1622
48	442.525	305.13	5.90971	22	1656
49	443.286	300.935	6.61833	22	1692
50	444.239	303.164	6.89171	22	1726
51	444.196	301.609	7.04458	22	1762
52	443.168	299.198	7.1509	22	1798
53	442.826	302.956	7.34334	22	1835
54	443.173	302.282	7.26171	22	1876
55	443.707	303.5	6.98044	22	1925
56	444.292	302.651	7.46648	22	1968
57	443.763	301.686	7.67253	22	2011
58	443.209	298.454	7.60567	22	2054
59	442.626	297.966	7.65251	22	2090
60	442.003	300.335	7.70199	22	2126
61	441.911	302.096	7.66127	22	2159
62	441.859	303.283	7.5487	22	2191
63	442.056	303.521	7.79062	22	2229
64	442.151	300.973	7.93556	22	2268
65	441.795	301.569	8.25619	22	2309
66	442.395	298.555	8.2174	22	2352
67	442.669	301.324	8.55358	22	2395
68	442.489	303.38	8.68369	22	2437
69	442.439	304.645	8.66877	22	2481
70	442.496	303.968	9.0533	22	2523
71	442.427	302.227	9.30589	22	2568
72	443.149	299.291	9.37678	22	2612
73	443.791	298.609	9.4978	22	2653
74	443.941	300.59	9.74854	22	2697
75	443.835	304.312	9.7179	22	2741
76	443.428	305.633	9.60118	22	2784
1	432.072	342.561	2.5	23	22
2	432.567	347.797	2.5	23	64
3	432.505	347.401	2.5	23	105
4	432.149	344.46	2.5	23	147
5	431.99	343.103	2.5	23	189
6	432.46	344.969	2.5	23	232
1	401.011	396.321	2.5	24	23
2	404.855	395.463	7.65495	24	70
3	407.628	392.559	8.24653	24	112
4	407.254	393.895	8.08406	24	153
5	408.229	393.169	8.40884	24	195
6	408.257	391.998	8.97772	24	238
7	408.377	392.176	9.04957	24	277
8	407.879	391.624	9.421	24	317
9	408.027	389.908	9.76945	24	356
10	407.887	387.895	10.1244	24	397
11	409.577	383.942	14.4653	24	447
12	408.546	382.36	12.8287	24	484
1	447.324	410.294	2.5	25	24
2	447.049	414.543	2.5	25	65
3	446.952	412.459	2.5	25	106
4	446.475	410.056	2.5	25	148
5	446.363	411.624	2.5	25	191
6	446.36	413.974	2.5	25	234
7	446.239	415.212	2.5	25	272
8	446.747	414.464	2.5	25	313
9	446.246	413.357	2.5	25	353
10	446.339	410.663	2.5	25	394
11	446.158	409.32	2.5	25	437
12	445.874	411.251	2.5	25	477
13	445.38	413.424	2.5	25	515
14	445.592	414.252	2.5	25	547
1	500.894	303.846	5.9201	26	25
2	500.191	303.458	5.6021	26	67
3	500.556	304.923	5.02198	26	108
4	505.24	310.142	4.89223	26	149
1	507.934	371.543	5.19999	27	26
2	507.934	324.904	22.5	27	84
3	507.934	324.266	22.5	27	126
4	501.18	324.451	22.5	27	169
5	499.188	325.086	22.5	27	210
1	457.654	260.577	7.0008	28	27
2	456.839	262.448	7.39129	28	69
3	456.643	261.511	7.06896	28	110
4	456.994	259.953	7.34486	28	151
5	456.98	261.944	7.41242	28	193
6	456.97	262.155	7.42626	28	236
7	456.859	261.994	7.70271	28	274
8	478.474	249.809	2.5	28	302
9	483.985	203.769	7.31217	28	343
10	483.154	205.525	6.28032	28	385
11	483.782	202.815	7.70912	28	428
12	486.738	194.838	5.5503	28	468
13	488.663	195.181	5.40186	28	504
14	481.857	191.352	6.79874	28	540
15	480.989	190.058	7.32336	28	572
16	478.402	190.677	8.67498	28	603
1	266.006	464.23	7.16481	29	28
2	247.456	452.135	6.04761	29	59
3	242.194	445.622	9.47407	29	102
4	242.433	446.408	9.60112	29	143
5	242.168	448.617	9.55002	29	186
6	244.356	427.329	12.3201	29	242
7	279.711	394.737	12.608	29	286
8	279.915	395.129	12.2484	29	323
9	279.754	395.979	12.7357	29	363
10	279.442	395.691	13.5621	29	404
11	279.136	394.611	12.5192	29	446
12	278.687	395.784	14.1205	29	486
13	278.84	395.26	14.6085	29	521
14	278.466	394.311	13.7852	29	555
15	278.464	393.626	14.1351	29	587
16	278.131	393.565	14.3868	29	617
17	278.333	394.91	14.5822	29	653
18	278.589	395.603	14.4516	29	686
19	278.257	395.323	14.7485	29	719
20	278.008	394.597	14.6705	29	755
21	278.027	393.965	14.6178	29	785
22	278.135	393.221	14.9677	29	818
23	278.05	393.12	15.0149	29	855
24	278.412	394.183	15.0939	29	897
25	278.775	395.105	15.5234	29	935
26	278.466	395.435	15.3401	29	974
27	278.283	395.314	15.0225	29	1013
28	278.374	396.295	16.8089	29	1046
29	278.339	394.662	16.3281	29	1076
30	278.181	394.962	16.059	29	1103
31	278.572	394.655	16.6394	29	1132
32	278.891	395.58	16.6173	29	1161
33	279.343	396.527	16.7452	29	1193
34	279.369	396.437	16.4502	29	1226
35	279.641	395.499	16.5589	29	1257
36	280.002	394.842	15.9678	29	1284
37	280.296	395.367	15.7618	29	1321
38	280.055	395.711	16.4263	29	1355
39	280.23	396.773	16.4201	29	1385
40	280.101	396.399	15.4695	29	1418
41	279.904	396.878	16.7151	29	1450
42	279.609	396.029	16.0495	29	1481
43	279.624	396.374	15.9995	29	1509
44	279.744	397.512	16.8889	29	1540
45	279.908	396.552	16.7977	29	1573
46	279.87	397.251	17.1472	29	1602
1	494.717	396.44	10.9275	30	29
2	501.662	415.087	12.179	30	79
1	156.797	49.0202	15.4824	31	30
2	156.997	45.9141	12.8321	31	71
3	179.199	37.4942	17.7874	31	114
4	180.391	36.9859	18.2657	31	155
5	181.792	35.9814	17.6764	31	199
6	207.312	10.9186	6.90467	31	217
7	215.143	2.98023e-08	7.26818	31	255
8	215.076	2.98023e-08	8.32113	31	295
9	214.215	2.8785	6.86667	31	335
10	214.5	1.51069	8.26363	31	376
11	215.008	2.98023e-08	9.42343	31	422
12	214.09	2.98023e-08	6.09754	31	461
13	214.156	2.98023e-08	8.92861	31	499
1	99.6374	196.473	14.1292	32	31
2	98.3569	197.768	16.1997	32	72
3	98.3585	197.73	14.9078	32	113
4	97.4604	198.152	15.6198	32	154
5	96.9128	200.132	12.9633	32	198
6	98.2011	197.454	14.7486	32	240
7	97.0933	199.054	14.5832	32	279
8	97.4569	198.566	16.1051	32	318
9	96.8448	198.799	15.4656	32	357
10	97.161	197.69	15.5295	32	399
11	96.7263	198.088	15.8757	32	440
12	96.5202	198.015	15.8535	32	480
13	96.6337	197.853	15.0554	32	519
14	96.7582	197.534	15.9732	32	551
15	95.8482	198.45	15.8997	32	582
16	95.8712	197.828	15.6984	32	614
17	96.5046	196.094	15.8395	32	646
18	95.7298	196.661	15.5586	32	679
19	95.9301	196.548	15.7725	32	711
20	94.8789	198.789	14.908	32	745
21	95.5311	197.766	16.1397	32	777
22	95.1877	198.051	16.2308	32	812
23	94.9094	198.125	15.7084	32	848
24	93.032	200.348	13.6232	32	889
25	96.7348	196.091	16.8153	32	928
26	96.673	196.086	16.9505	32	967
27	96.1106	197.13	17.7595	32	1006
28	95.9417	197.428	17.2056	32	1041
29	95.355	199.272	16.6785	32	1072
1	392.739	213.826	14.214	33	32
2	392.062	215.735	14.7958	33	74
3	391.938	215.007	13.8726	33	118
4	397.949	216.071	11.1225	33	139
1	481.024	185.336	20.2704	34	33
2	481.223	187.885	18.0574	34	75
3	480.867	189.282	18.1615	34	119
4	481.091	186.62	19.4889	34	161
5	480.276	186.789	17.7008	34	203
6	481.443	186.724	22.5	34	247
7	480.795	187.007	19.3862	34	282
8	481.257	187.174	18.6849	34	320
9	481.227	186.823	22.5	34	366
10	479.708	184.817	22.5	34	412
11	480.616	186.891	19.5608	34	444
12	480.664	186.142	22.5	34	488
13	480.86	186.698	22.5	34	523
14	480.934	186.823	22.5	34	557
15	479.821	187.244	22.5	34	589
16	479.345	185.397	22.5	34	620
17	479.452	182.928	22.5	34	655
18	479.78	181.849	22.5	34	688
19	479.412	188.138	19.7397	34	713
20	479.026	187.094	20.1834	34	749
21	478.212	186.841	18.1635	34	780
22	480.34	185.939	22.5	34	823
23	478.886	183.488	22.5	34	861
24	479.29	184.033	20.9652	34	891
25	479.703	184.879	21.2023	34	931
26	480.137	186.531	22.5	34	977
27	479.167	187.385	20.1518	34	1009
28	481.934	186.312	22.5	34	1047
29	480.443	183.048	22.5	34	1077
30	479.278	183.402	22.5	34	1106
31	479.263	185.196	21.0869	34	1128
32	480.022	185.516	22.5	34	1163
33	481.424	186.761	22.5	34	1196
34	481.995	187.585	22.5	34	1229
35	481.861	185.802	22.5	34	1258
36	480.363	186.727	22.5	34	1288
37	480.143	191.955	18.2217	34	1316
38	482.155	182.868	22.5	34	1358
39	483.637	184.661	22.5	34	1389
40	484.444	186.56	22.5	34	1422
41	482.46	188.023	22.5	34	1453
42	481.981	182.851	22.5	34	1483
43	481.401	182.905	22.5	34	1511
44	483.388	186.566	22.5	34	1544
45	482.956	183.6	22.5	34	1575
46	483.195	187.208	22.5	34	1604
47	482.21	184.624	22.5	34	1637
48	480.152	182.47	22.5	34	1674
49	480.316	189.973	18.8248	34	1700
50	480.409	181.466	22.5	34	1743
51	482.424	182.754	22.5	34	1780
52	482.22	186.188	22.5	34	1814
53	483.244	186.282	22.5	34	1857
54	482.287	187.04	22.5	34	1901
55	476.608	189.033	19.89	34	1934
1	204.13	332.965	13.863	35	34
2	204.413	334.632	12.5297	35	76
3	204.375	335.915	12.5516	35	120
4	204.382	335.848	13.0529	35	162
5	204.185	335.359	12.5066	35	204
6	205.318	338.669	10.1752	35	229
1	49.8406	421.952	19.3643	36	35
2	49.4304	422.77	20.7947	36	77
3	48.5641	426.414	19.9911	36	121
4	54.4012	424.296	17.4208	36	164
5	49.8345	421.552	19.304	36	206
6	53.9019	425.051	17.8279	36	244
7	49.4008	421.515	20.7006	36	285
8	48.0703	425.731	22.5	36	326
9	47.0063	427.527	22.5	36	368
1	442.295	347.018	13.691	37	36
2	454.272	361.285	5.14906	37	68
3	453.977	362.204	4.49086	37	109
4	454.675	361.263	4.97	37	150
5	455.109	357.943	2.5	37	190
6	454.853	360.139	2.5	37	233
7	464.698	367.21	10.3642	37	276
8	477.013	369.192	12.2183	37	322
9	477.127	367.03	22.5	37	370
10	464.54	351.411	20.0763	37	409
11	460.523	360.057	22.5	37	454
12	460.246	359.874	22.5	37	491
13	460.276	358.489	22.5	37	526
1	281.025	396.288	12.7329	38	37
2	280.516	396.658	12.4934	38	78
3	280.321	396.986	13.3207	38	122
4	280.282	396.831	13.334	38	165
5	279.836	395.917	13.1899	38	207
1	413.803	297.044	15.261	39	38
2	411.286	302.88	2.5	39	62
1	273.599	474.322	17.7194	40	39
2	273.06	473.637	16.7595	40	81
3	273.151	473.887	17.1549	40	123
4	272.575	473.043	17.0644	40	166
5	266.924	464.991	10.3108	40	196
6	265.931	464.391	8.74151	40	237
7	265.852	463.394	8.22224	40	275
8	265.25	462.872	8.32828	40	316
9	265.401	463.515	8.08977	40	355
10	265.125	464.262	8.18387	40	396
11	264.817	464.093	8.38811	40	439
12	264.845	464.556	8.31964	40	479
13	265.208	463.544	8.12519	40	517
14	264.285	461.619	7.85743	40	550
15	243.511	454.415	5.6562	40	575
16	248.237	442.948	2.5	40	604
17	246.598	440.307	2.5	40	638
1	500.214	420.88	19.3323	41	40
2	492.238	441.271	12.1631	41	80
1	151.423	263.65	22.5	42	41
2	150.114	264.317	22.5	42	83
3	149.393	264.677	22.5	42	125
4	149.783	264.437	22.5	42	168
5	149.756	266.029	22.5	42	209
6	149.245	266.824	22.5	42	249
7	148.902	266.327	22.5	42	288
8	148.293	265.612	22.5	42	325
9	148.176	264.677	22.5	42	367
10	149.366	263.083	22.5	42	413
11	150.188	265.656	22.5	42	452
12	149.75	266.553	22.5	42	489
13	149.833	265.996	22.5	42	524
14	150.857	267.735	22.5	42	558
15	147.876	265.243	22.5	42	590
16	149.397	264.545	22.5	42	621
17	184.223	233.207	5.18705	42	630
2	452.931	81.4417	22.5	43	82
3	452.379	82.8167	22.5	43	124
4	452.511	80.7899	22.5	43	167
5	452.604	75.6824	22.5	43	208
6	452.296	75.9941	22.5	43	246
7	452.223	80.6089	22.5	43	287
8	452.035	82.706	22.5	43	324
9	451.979	82.5001	22.5	43	365
10	451.671	81.5383	22.5	43	411
11	454.2	71.2824	22.5	43	451
3	329.936	138.835	10.3269	44	97
4	346.916	128.447	3.5161	44	136
5	346.937	126.846	4.82022	44	180
6	350.111	119.551	7.38626	44	223
3	360.526	325.302	7.66402	45	111
4	360.103	329.009	6.72479	45	152
5	358.963	339.389	7.60494	45	194
3	399.744	222.292	12.0752	46	117
4	401.79	228.764	11.2845	46	159
4	215.484	127.351	2.5	47	130
5	179.175	151.999	12.5651	47	197
4	410.104	237.874	17.5157	48	160
5	411.453	236.237	15.793	48	202
6	409.164	236.447	10.1237	48	225
4	78.9821	500.108	15.3262	49	163
5	76.7976	502.497	12.007	49	205
6	76.6579	503.151	12.0483	49	243
7	75.1655	505.809	12.0915	49	283
8	69.5022	507.934	7.84373	49	308
9	65.6987	507.934	6.49257	49	349
10	62.4107	505.443	7.22075	49	390
11	61.3915	503.335	7.15459	49	433
12	61.0744	503.078	6.86889	49	473
13	60.7668	502.235	6.62267	49	511
14	58.5173	492.049	5.82092	49	543
15	66.5632	479.748	9.45332	49	578
16	66.6065	479.687	9.2918	49	609
17	66.0092	480.452	9.82566	49	642
18	66.3496	480.542	9.79314	49	674
19	65.6644	481.885	9.8364	49	707
20	65.8518	481.239	10.3725	49	741
21	66.1924	480.343	9.85004	49	773
22	66.5733	478.996	9.79889	49	805
23	67.7343	472.502	11.5982	49	852
24	67.7604	470.585	11.8639	49	893
25	69.0341	466.879	11.3734	49	933
26	68.78	465.251	11.0093	49	959
27	69.547	464.949	11.3198	49	1011
28	70.4961	465.15	11.5734	49	1044
29	66.6457	460.288	11.0429	49	1065
30	66.219	458.484	11.6685	49	1101
31	66.048	456.932	11.4663	49	1130
32	66.3481	456.647	12.2753	49	1158
33	66.5851	457.197	11.9795	49	1189
34	66.4925	456.838	11.6243	49	1221
35	67.0157	457.232	12.079	49	1252
36	67.3166	455.022	12.8515	49	1281
37	67.6469	447.368	14.5984	49	1319
38	59.7625	428.056	17.4535	49	1354
5	71.0695	125.744	2.5	50	172
6	85.1319	120.363	2.5	50	214
7	87.888	117.972	2.5	50	252
8	82.6055	117.156	2.5	50	292
9	77.1147	124.061	2.5	50	331
10	77.2744	125.21	2.5	50	373
11	81.4417	121.544	2.5	50	416
12	82.7594	120	2.5	50	458
13	83.9225	118.219	2.5	50	495
14	86.1067	116.575	2.5	50	530
15	86.598	115.838	2.5	50	564
16	86.6627	117.88	2.5	50	594
17	86.3037	119.474	2.5	50	625
18	84.9909	119.106	2.5	50	659
19	84.2383	118.741	2.5	50	695
20	54.2182	124.991	8.7998	50	732
5	116.432	50.677	6.07648	51	174
6	80.0341	75.7303	10.5244	51	218
7	79.9878	74.6554	9.85703	51	259
8	79.9202	75.5464	9.84737	51	298
9	78.9813	78.9158	9.44746	51	338
10	74.5373	85.7956	7.86745	51	379
11	75.7433	85.7959	6.2592	51	421
12	76.4418	93.5124	2.5	51	457
13	76.3782	87.9797	3.95548	51	497
14	76.1469	88.0783	4.28656	51	532
15	75.9448	88.0373	5.54719	51	567
16	76.211	86.9331	4.62781	51	597
17	76.2519	86.4988	5.83263	51	628
18	75.9692	86.5847	6.22137	51	663
19	75.8415	87.668	5.50601	51	697
20	75.6867	86.3179	6.63231	51	730
21	75.6731	87.5709	6.15945	51	764
22	75.5991	88.0217	6.20106	51	794
23	76.4104	86.7882	5.01299	51	831
24	76.2638	86.8045	6.76184	51	870
25	76.6559	85.2494	6.66439	51	909
26	76.5718	85.1683	7.6381	51	946
27	74.6515	83.6849	9.58307	51	988
28	76.0767	85.8797	8.17004	51	1021
29	76.2227	87.9444	7.49577	51	1057
30	76.2621	88.5037	7.67664	51	1086
31	76.4752	87.8048	7.82633	51	1115
32	76.8317	87.1111	7.67212	51	1141
33	77.2681	87.5012	7.7779	51	1170
34	77.2291	87.511	7.36308	51	1204
35	77.3488	88.9768	7.28351	51	1237
36	77.6028	88.9047	7.92431	51	1265
37	77.8159	88.0591	8.4677	51	1297
38	78.4927	87.7217	7.49762	51	1331
39	77.7321	87.3406	9.0955	51	1369
40	78.1755	86.845	8.26798	51	1396
41	78.1264	88.3352	7.84519	51	1430
42	77.7155	88.7888	8.48558	51	1463
43	77.84	88.8589	8.50711	51	1490
44	78.6399	86.2727	8.3552	51	1519
45	78.4054	88.2577	7.74204	51	1551
46	78.5937	87.1442	8.5792	51	1583
47	78.3214	86.4893	8.9616	51	1611
48	79.5196	83.8808	8.52472	51	1643
49	78.111	88.4621	8.60663	51	1680
50	78.7071	85.4192	9.22119	51	1718
51	77.9867	87.7917	9.64867	51	1754
52	77.5925	89.4173	9.15062	51	1789
53	77.9656	85.2511	9.83315	51	1826
54	77.7445	86.9651	9.47059	51	1866
55	78.4142	83.8594	9.77609	51	1912
56	78.2906	83.9901	10.0262	51	1956
57	80.6088	72.5559	15.2787	51	2015
58	79.3308	77.781	14.5316	51	2059
5	421.081	2.98023e-08	2.5	52	176
6	421.143	2.98023e-08	2.5	52	219
7	421.008	2.98023e-08	2.5	52	260
6	240.464	6.66677	2.5	53	211
7	238.904	2.98023e-08	13.3092	53	278
6	41.0786	1.27343	13.0873	54	239
7	40.2419	2.98023e-08	9.86934	54	258
6	74.7766	490.774	20.1035	55	245
7	71.8229	494.356	18.5774	55	284
8	71.0578	493.656	18.5557	55	321
9	68.153	488.886	20.5525	55	361
10	67.1266	486.496	20.6431	55	403
6	411.666	240.352	22.5	56	248
7	411.1	241.801	13.616	56	281
8	422.757	235.148	8.8844	56	305
9	420.685	242.608	9.05042	56	345
10	419.873	236.805	12.1212	56	400
11	419.463	236.826	11.5794	56	442
12	418.27	237.193	12.5603	56	481
13	423.727	231.801	8.11574	56	506
14	430.742	227.916	2.5	56	536
15	436.382	227.884	2.5	56	569
16	447.403	225.904	2.5	56	600
17	479.965	232.379	2.5	56	633
18	479.987	224.846	2.5	56	667
19	478.179	198.295	10.425	56	703
20	478.19	197.507	12.2846	56	747
7	220.943	234.524	2.5	57	254
8	220.538	235.744	2.5	57	294
9	220.177	237.445	2.5	57	333
10	219.981	237.465	2.5	57	375
11	219.815	237.45	2.5	57	418
12	219.893	235.498	2.5	57	460
7	116.756	49.8858	7.50828	58	256
8	116.792	50.1987	7.03899	58	296
9	116.156	52.2645	7.15108	58	336
10	117.128	51.3444	7.13424	58	377
11	116.465	51.2422	8.48805	58	420
12	116.357	49.9554	8.23871	58	464
13	116.328	49.9102	9.45819	58	500
14	116.264	48.3952	8.91405	58	534
7	333.178	60.5234	2.5	59	261
8	334.714	56.3861	2.5	59	300
9	327.734	53.6373	2.5	59	339
7	470.665	386.996	2.5	60	271
8	467.936	388.318	2.5	60	312
9	463.544	390.951	2.5	60	352
10	462.914	389.882	2.5	60	393
11	467.641	383.719	2.5	60	436
12	470.611	383.262	2.5	60	476
13	471.882	384.006	2.5	60	514
14	504.641	418.796	7.90591	60	549
15	507.934	418.046	7.23607	60	581
7	499.477	321.17	22.5	61	289
8	507.934	324.406	22.5	61	327
9	507.934	323.456	22.5	61	369
8	56.5636	116.008	10.7559	62	299
9	38.2853	144.94	8.54548	62	337
10	33.6088	151.862	10.118	62	380
11	34.431	157.946	9.93075	62	423
12	35.7503	164.695	4.60434	62	463
13	35.8054	165.18	4.236	62	498
8	458.462	257.793	7.05949	63	315
9	433.536	237.339	2.5	63	341
10	434.523	240.317	2.5	63	383
11	434.209	238.183	2.5	63	425
12	432.613	233.919	2.5	63	466
13	434.801	240.104	2.5	63	502
14	435.678	247.451	2.5	63	537
15	435.788	251.486	2.5	63	570
16	436.172	252.557	2.5	63	601
17	437.486	251.827	2.5	63	634
18	437.28	250.401	2.5	63	668
8	443.614	339.511	22.5	64	328
9	479.927	373.348	12.7792	64	362
10	491.888	407.716	12.8735	64	405
9	184.262	369.362	7.20368	65	348
10	181.159	370.941	7.33136	65	389
11	168.008	369.323	7.47803	65	432
12	167.731	369.633	7.39788	65	472
13	167.631	369.611	7.87157	65	510
14	167.658	368.774	7.7802	65	544
15	168.519	367.224	7.54794	65	576
16	167.159	367.71	8.07107	65	607
17	167.567	368.256	7.82335	65	640
18	168.134	368.137	7.97169	65	672
19	168.078	366.15	6.22494	65	704
20	168.102	361.344	4.92229	65	737
21	168.415	361.512	5.4666	65	769
22	168.309	362.236	5.4721	65	802
23	168.622	362.691	5.52283	65	840
24	168.444	363.054	6.01583	65	877
25	167.969	360.951	5.72535	65	917
26	167.752	359.902	5.33658	65	954
27	168.36	359.385	6.22503	65	996
28	152.325	357.545	3.99089	65	1031
29	152.794	357.801	5.44206	65	1062
9	67.1919	71.9004	19.4959	66	358
10	68.6714	66.2507	22.5	66	410
11	70.5146	36.1143	20.8375	66	441
9	434.377	123.037	17.4616	67	359
10	434.595	125.4	17.5211	67	401
11	434.741	127.593	19.4679	67	443
12	433.254	121.906	17.11	67	482
13	433.145	120.794	16.7235	67	520
14	451.04	103.033	5.17402	67	538
15	465.379	83.5595	13.1212	67	583
9	414.331	364.312	15.7352	68	364
10	414.146	365.301	15.159	68	406
11	414.251	365.385	17.149	68	449
12	411.693	373.648	19.9462	68	487
13	408.222	375.6	14.533	68	518
14	410.137	381.707	15.8571	68	554
15	408.733	385.225	13.5771	68	586
16	410.117	388.266	11.0021	68	613
17	407.993	387.613	12.5921	68	651
18	407.015	386.779	12.7298	68	683
19	407.22	382.909	12.9572	68	716
20	407.012	381.887	13.3675	68	753
10	478.749	250.615	2.5	69	384
11	478.259	250.316	2.5	69	426
10	480.065	387.425	9.51235	70	398
11	499.383	354.315	22.5	70	453
12	494.702	348.041	22.5	70	490
13	494.281	346.631	22.5	70	525
14	493.786	344.914	22.5	70	560
15	492.733	341.949	22.5	70	591
16	493.115	342.208	22.5	70	622
17	493.103	344.795	22.5	70	656
18	493.407	347.017	22.5	70	691
19	493.444	347.108	22.5	70	725
20	493.057	345.747	22.5	70	759
21	492.569	343.518	22.5	70	789
22	491.864	342.368	22.5	70	826
23	492.748	342.656	22.5	70	864
24	493.674	345.026	22.5	70	903
25	493.775	347.233	22.5	70	941
26	493.962	346.752	22.5	70	980
27	493.663	345.182	22.5	70	1016
28	493.174	344.137	22.5	70	1050
29	494.356	341.477	22.5	70	1079
30	493.733	344.5	22.5	70	1108
31	493.963	346.756	22.5	70	1135
32	494.58	347.869	22.5	70	1165
33	494.513	346.647	22.5	70	1198
34	494.923	344.404	22.5	70	1231
35	494.775	341.508	22.5	70	1260
36	494.498	342.374	22.5	70	1291
37	495.207	346.733	22.5	70	1325
38	495.588	348.152	22.5	70	1361
39	495.407	347.752	22.5	70	1392
40	494.887	345.387	22.5	70	1425
41	494.816	343.637	22.5	70	1456
42	494.829	345.4	22.5	70	1485
43	494.773	345.799	22.5	70	1513
44	495.289	347.599	22.5	70	1546
45	494.72	349.748	22.5	70	1578
10	494.292	439.081	15.8954	71	407
11	494.656	438.329	18.217	71	450
12	495.42	435.513	22.5	71	492
13	495.813	433.48	22.5	71	527
14	496.533	431.753	22.5	71	561
15	494.638	437.636	18.5129	71	588
16	492.902	439.197	16.4614	71	619
17	492.193	439.725	16.4675	71	654
18	492.088	440.842	16.702	71	687
19	491.827	441	16.5353	71	720
20	480.8	449.635	8.26215	71	744
21	480.342	451.765	7.94339	71	776
22	481.112	453.436	7.94749	71	811
10	498.724	409.792	17.562	72	408
11	499.797	412.356	14.7308	72	448
12	500.219	411.747	13.1658	72	485
13	507.934	323.673	20.5759	73	522
14	500.815	324.537	22.5	73	559
14	54.5581	126.197	8.34612	74	533
15	66.0546	139.95	2.5	74	565
14	58.8901	428.349	13.8983	75	553
15	53.6258	423.147	16.9823	75	585
16	60.2823	411.505	14.3065	75	616
17	60.1208	411.649	14.7884	75	648
18	60.1883	411.509	14.837	75	682
19	60.2952	410.767	15.012	75	715
20	60.4156	410.3	14.3579	75	751
21	60.3096	409.813	14.4979	75	782
22	60.2164	410.499	14.7483	75	816
23	60.5197	410.653	14.5139	75	853
24	60.6457	410.974	14.9809	75	895
25	60.8961	410.94	15.4802	75	934
26	60.9719	410.499	15.502	75	972
27	60.9609	410.592	14.9246	75	1012
28	60.9938	410.12	15.649	75	1045
29	61.2546	410.94	15.0519	75	1075
30	61.0643	410.631	15.5873	75	1102
31	61.1422	410.904	15.9894	75	1131
32	61.2573	411.286	16.0568	75	1160
33	61.6106	411.433	16.0738	75	1191
34	61.7591	410.85	15.6579	75	1222
35	60.3937	421.051	18.1099	75	1254
36	55.4044	423.092	22.5	75	1290
37	47.2624	429.486	22.5	75	1324
38	51.9207	424.721	22.5	75	1360
39	51.424	424.617	22.5	75	1391
40	52.292	422.517	22.5	75	1424
41	52.3218	422.624	22.5	75	1455
42	48.7959	425.37	22.5	75	1484
43	53.3633	425.321	22.5	75	1512
44	49.5893	423.332	22.5	75	1545
45	50.4114	425.08	22.5	75	1576
46	51.8504	421.354	22.5	75	1605
47	54.3457	423.33	22.5	75	1638
48	50.6973	423.635	22.5	75	1676
49	55.0429	420.719	22.5	75	1707
50	49.0052	425.365	22.5	75	1745
51	49.7863	424.118	22.5	75	1782
52	49.6037	422.418	22.5	75	1817
53	49.1593	422.803	22.5	75	1858
54	50.7536	418.92	22.5	75	1903
55	46.1355	427.723	22.5	75	1947
56	46.4616	428.322	22.5	75	1991
57	22.9652	416.414	22.5	75	2033
14	333.722	38.0877	22.5	76	556
15	371.974	11.7624	15.6723	76	584
16	368.117	11.0622	12.0031	76	615
17	367.583	15.2756	10.0515	76	636
18	367.336	16.1877	9.62909	76	670
19	367.58	13.6687	10.6661	76	702
20	367.85	21.5827	10.2148	76	735
21	368.005	19.3359	9.57905	76	768
22	371.634	15.5036	16.0073	76	813
23	371.766	15.9773	17.2532	76	850
16	219.519	236.425	2.5	77	596
17	219.349	236.852	2.5	77	627
18	219.627	235.776	2.5	77	661
16	83.3589	227.019	8.11248	78	598
17	88.2703	230.566	4.18515	78	629
18	87.6087	235.288	4.03562	78	664
19	86.7194	237.315	4.51744	78	698
20	89.7636	265.616	2.5	78	736
16	445.172	411.621	2.5	79	611
17	445.095	409.502	2.5	79	644
16	404.113	288.525	17.3746	80	618
17	404.099	279.832	13.3913	80	649
18	403.48	278.577	14.3064	80	684
19	403.61	278.944	14.0434	80	717
20	403.999	278.047	13.3479	80	752
21	403.754	274.607	12.996	80	783
22	406.475	271.643	6.86465	80	809
23	406.815	271.179	6.38811	80	847
24	407.513	271.007	7.20031	80	885
25	406.754	271.112	6.9937	80	924
26	406.879	272.034	7.16611	80	962
27	407	271.694	7.68074	80	1002
28	415.119	253.299	4.21771	80	1025
29	414.955	254.855	4.94596	80	1067
30	413.67	249.5	9.82716	80	1092
31	413.891	249.022	9.50661	80	1119
32	413.842	247.833	9.41738	80	1147
33	412.979	247.373	10.4998	80	1178
34	413.218	248.668	10.1639	80	1212
35	413.644	249.869	9.92699	80	1243
36	413.602	249.677	10.6303	80	1271
37	413.762	250.277	11.0012	80	1304
38	413.993	248.332	10.0897	80	1338
39	414.379	247.034	9.92618	80	1374
40	419.059	247.944	6.93916	80	1404
41	420.834	250.507	7.95766	80	1437
42	439.147	248.873	6.76476	80	1467
43	439.262	248.329	6.56624	80	1494
44	439.445	251.628	6.94924	80	1523
45	439.396	250.215	6.91078	80	1555
46	440.798	252.028	7.08104	80	1587
47	420.301	237.502	15.7903	80	1629
48	420.231	234.502	15.4959	80	1664
49	416.834	234.878	18.2137	80	1698
50	419.276	235.67	16.71	80	1732
51	421.564	237.672	15.3003	80	1769
52	423.044	233.716	13.2081	80	1804
53	423.53	228.044	12.3593	80	1843
54	428.631	228.553	9.33297	80	1872
55	439.487	226.271	7.89227	80	1916
56	438.506	228.664	7.66712	80	1960
57	438.533	228.695	7.94924	80	2002
58	438.173	226.549	8.15294	80	2045
59	437.874	224.203	8.19324	80	2081
60	438.172	222.961	8.31772	80	2117
61	438.11	223.737	8.47598	80	2152
62	438.626	227.947	8.65816	80	2184
63	438.428	228.576	8.7992	80	2223
64	438.604	227.448	8.50786	80	2263
65	437.843	223.362	9.00791	80	2306
66	438.713	225.315	9.27291	80	2347
67	437.523	223.293	9.19966	80	2393
68	438.497	224.846	9.52223	80	2435
69	439.6	226.558	9.59327	80	2477
70	440.035	228.189	9.20508	80	2520
71	439.821	228.461	9.26987	80	2564
72	439.355	227.163	9.79316	80	2609
73	439.439	224.546	9.82196	80	2650
74	439.457	224.035	9.98785	80	2693
75	439.667	226.105	10.201	80	2738
76	439.524	228.459	10.3518	80	2782
77	439.697	229.181	9.50838	80	2824
78	440.655	228.796	10.4567	80	2861
79	441.344	226.322	10.301	80	2901
80	440.765	225.558	10.2339	80	2942
81	440.152	224.424	10.4198	80	2979
82	440.764	225.521	10.501	80	3015
83	441.129	227.86	10.5319	80	3050
84	441.557	228.771	10.4467	80	3090
85	441.933	227.812	10.1191	80	3134
86	440.94	226.807	10.6357	80	3178
87	440.406	224.494	10.6668	80	3225
88	440.377	223.314	10.8001	80	3266
89	440.146	225.179	10.9358	80	3306
90	439.971	227.772	11.0998	80	3349
91	439.485	228.603	11.3964	80	3406
92	440.194	227.448	10.7365	80	3438
93	439.419	226.838	11.2647	80	3490
94	438.632	224.888	11.4881	80	3522
95	438.791	223.618	11.8331	80	3554
96	439.552	224.444	11.9034	80	3591
97	439.989	227.348	11.4495	80	3630
98	440.926	226.543	12.055	80	3664
99	440.513	227.041	12.0202	80	3704
100	440.048	226.326	12.3339	80	3742
101	438.796	223.429	12.355	80	3784
102	439.214	223.194	12.4851	80	3824
103	439.444	224.562	12.6141	80	3855
104	440.342	226.638	12.6306	80	3889
105	440.651	227.478	12.779	80	3926
106	441.552	226.791	12.5225	80	3964
107	440.341	226.157	12.8376	80	4004
108	439.784	223.425	12.7682	80	4038
109	439.982	223.503	12.8236	80	4076
110	440.99	224.75	12.9513	80	4116
111	441.186	226.826	12.6355	80	4156
112	441.434	227.634	12.5443	80	4195
113	441.04	226.204	12.87	80	4233
114	440.724	226.05	12.7526	80	4272
115	440.201	224.06	12.9835	80	4311
116	440.372	224.014	13.3036	80	4349
117	441.071	226.266	13.319	80	4385
118	441.749	227.656	13.3063	80	4423
119	442.102	227.943	13.4583	80	4457
120	441.908	227.522	13.5303	80	4492
121	441.171	225.997	13.4895	80	4526
122	440.534	223.955	13.2821	80	4557
123	440.119	225.961	13.9537	80	4591
124	440.422	227.036	13.6638	80	4623
125	440.709	228.361	13.9031	80	4655
126	441.086	227.552	14.0645	80	4687
127	440.494	226.233	12.9984	80	4718
128	440.133	223.77	14.2965	80	4756
129	439.324	223.21	14.2883	80	4793
130	439.316	223.861	14.5146	80	4830
131	440.001	225.461	14.5215	80	4866
132	440.135	227.412	14.0419	80	4904
133	440.046	227.457	14.5843	80	4944
134	439.82	226.712	14.7138	80	4985
135	438.931	224.667	14.7466	80	5021
136	437.909	223.278	14.8147	80	5053
137	439.165	224.737	15.0766	80	5089
138	439.417	226.001	15.1668	80	5128
139	439.744	227.572	15.0277	80	5165
140	439.796	227.037	15.2073	80	5204
141	439.395	225.715	15.3774	80	5238
142	438.579	224.275	15.4537	80	5270
143	439.14	222.863	15.3453	80	5305
144	439.513	224.746	15.5459	80	5344
145	439.413	225.473	15.5381	80	5388
146	440.199	227.955	15.3869	80	5428
147	439.975	225.61	15.0946	80	5471
148	439.495	224.152	15.9625	80	5515
149	439.249	224.042	15.916	80	5561
150	440.675	226.34	16.1357	80	5607
151	440.553	227.34	16.0156	80	5653
152	442.009	227.462	16.0665	80	5700
153	440.638	227.252	15.6514	80	5745
154	440.664	226.572	16.5081	80	5785
155	439.535	224.469	16.3513	80	5826
156	439.667	224.181	16.3889	80	5861
157	440.172	224.949	16.3814	80	5896
158	441.205	227.847	16.4838	80	5931
159	440.73	228.369	16.2967	80	5969
160	441.082	225.925	16.0405	80	6007
161	440.602	224.793	16.5811	80	6048
162	439.326	223.335	16.5892	80	6087
163	438.783	224.1	17.0217	80	6130
164	441.159	225.736	16.9125	80	6167
165	440.676	227.35	16.4525	80	6203
166	440.566	226.967	15.9161	80	6234
167	439.731	223.059	17.251	80	6266
17	116.012	49.2519	9.52371	81	631
18	115.983	50.4165	9.29654	81	665
19	116.059	49.9845	9.63832	81	699
20	115.459	49.0207	9.82256	81	731
21	116.335	48.7279	9.71528	81	765
22	116.662	47.2669	10.2025	81	796
23	116.604	47.987	10.4354	81	833
24	116.853	48.7768	10.1991	81	872
25	116.76	49.4169	10.22	81	912
26	116.698	49.5805	10.7549	81	947
27	116.716	49.8582	10.9038	81	987
28	116.917	49.8971	11.4254	81	1040
29	117.568	49.0416	10.9714	81	1058
30	117.481	49.3654	10.7131	81	1088
31	118.369	48.59	11.8162	81	1127
32	117.956	49.2651	11.4797	81	1155
33	117.86	50.9788	10.9201	81	1174
34	118.192	50.3486	10.8056	81	1207
17	458.577	72.1238	13.8948	82	647
18	458.245	71.5378	12.5364	82	680
19	455.204	66.9554	14.6884	82	712
20	454.409	65.7432	15.2936	82	748
21	455.522	66.783	13.8591	82	779
22	472.616	69.8135	9.00467	82	798
23	476.246	70.7685	9.40606	82	838
24	478.426	73.0206	9.39896	82	876
25	479.053	74.7483	10.6088	82	915
26	478.315	73.3218	10.1731	82	952
27	478.374	71.4942	9.60709	82	993
28	479.585	71.3961	9.66519	82	1029
17	265.364	378.422	12.4633	83	650
18	264.448	383.832	14.8478	83	685
19	262.537	383.522	14.938	83	718
20	264.208	383.741	15.4356	83	754
21	265.615	383.364	15.0824	83	784
22	263.71	382.101	14.2321	83	817
23	260.384	382.356	12.4413	83	854
24	258.407	382.855	10.0666	83	888
25	253.292	385.853	7.8132	83	921
26	250.125	386.594	6.12341	83	955
27	249.025	388.828	5.65997	83	997
28	247.543	392.538	4.34815	83	1033
17	454.173	276.435	15.0352	84	652
18	463.846	270.611	5.17663	84	676
18	59.3662	35.3061	4.32449	85	662
19	56.7206	40.7654	2.5	85	692
18	463.184	261.559	7.86074	86	677
19	461.136	257.117	6.97116	86	709
18	146.29	266.6	22.5	87	689
19	146.768	267.527	22.5	87	722
18	495.86	324.378	22.5	88	690
19	497.361	321.342	22.5	88	724
20	498.449	319.367	22.5	88	758
21	497.389	314.608	22.5	88	788
22	498.039	316.184	22.5	88	825
23	499.149	318.513	22.5	88	863
24	499.208	320.988	22.5	88	902
25	499.656	322.269	22.5	88	940
26	507.934	325.915	17.425	88	975
27	491.908	318.591	17.2187	88	1014
19	289.682	496.63	16.9377	89	721
20	284.195	483.993	14.6473	89	756
19	158.718	267.186	22.5	90	723
20	156.581	278.4	22.5	90	757
21	146.311	266.467	22.5	90	787
22	146.079	265.739	22.5	90	824
23	147.325	262.419	22.5	90	862
24	145.998	264.043	22.5	90	900
25	147.099	266.006	22.5	90	938
26	146.527	268.223	22.5	90	978
27	146.919	268.217	22.5	90	1015
28	146.687	266.961	22.5	90	1048
29	146.378	263.424	22.5	90	1078
30	146.76	263.951	22.5	90	1107
31	147.225	265.539	22.5	90	1134
32	147.108	266.997	22.5	90	1164
33	147.185	267.545	22.5	90	1197
34	147.301	266.787	22.5	90	1230
35	147.901	265.596	22.5	90	1259
36	149.174	264.687	22.5	90	1289
37	148.863	264.371	22.5	90	1323
38	148.905	265.483	22.5	90	1359
39	148.14	267.045	22.5	90	1390
40	148.764	265.957	22.5	90	1423
41	150.749	263.682	22.5	90	1454
42	192.324	242.217	5.05351	90	1461
20	87.01	119.662	2.5	91	728
21	76.8492	164.049	2.5	91	761
22	75.6692	165.493	2.5	91	791
23	74.3589	164.342	5.0511	91	832
24	81.3676	171.413	2.5	91	867
25	89.1558	176.108	7.59451	91	910
26	88.3163	211.736	17.7958	91	968
20	356.025	314.62	6.50303	92	743
21	352.701	315.427	5.32626	92	775
22	352.064	326.539	2.5	92	808
23	351.784	326.682	2.5	92	845
24	357.778	337.866	8.16355	92	886
25	355.808	337.544	13.5502	92	926
26	357.778	339.305	9.31115	92	965
27	358.887	342.317	9.13168	92	1004
28	360.945	346.873	9.40405	92	1038
29	335.789	312.035	5.32745	92	1068
30	323.719	309.726	2.5	92	1096
20	381.701	192.296	13.2451	93	746
21	382.06	191.838	12.8119	93	778
20	67.344	374.753	12.3621	94	750
21	64.3187	369.235	12.0637	94	781
22	59.8196	361.595	12.4157	94	815
23	59.6209	364.937	9.14173	94	842
24	59.7117	366.722	7.70906	94	879
21	354.069	306.756	18.9271	95	786
22	354.43	306.84	20.1159	95	821
23	355.045	308.125	19.713	95	859
24	354.932	307.699	22.5	95	901
22	131.999	184.626	8.02563	96	795
23	132.267	187.973	9.27386	96	834
24	130.403	176.765	6.88638	96	871
25	117.523	185.678	5.2461	96	907
26	104.701	199.757	2.5	96	944
27	106.103	197.763	2.5	96	983
28	98.9271	205.351	2.5	96	1018
29	97.9976	211.539	2.5	96	1053
30	98.6614	209.337	2.5	96	1081
31	97.7688	209.689	2.5	96	1110
32	95.2248	208.74	5.63169	96	1140
33	94.0937	208.124	6.38493	96	1172
34	94.7756	209.35	6.11736	96	1202
35	95.5023	207.822	4.78603	96	1235
36	96.6938	212.866	5.06804	96	1263
37	96.774	217.855	2.5	96	1292
38	89.1014	236.408	7.20123	96	1333
39	88.5872	238.199	7.11996	96	1367
40	87.5766	246.629	6.5222	96	1398
41	97.3275	268.901	6.60173	96	1439
42	98.3954	269.125	4.93485	96	1469
43	98.9567	270.064	5.80211	96	1497
22	450.718	56.2706	10.1979	97	800
23	451.917	66.6516	9.42712	97	837
24	452.611	70.5341	9.59803	97	875
25	449.827	67.2217	12.3723	97	929
26	449.6	69.9438	12.1357	97	969
27	452.988	69.6853	9.66195	97	992
28	440.383	60.6608	8.96502	97	1028
22	67.2216	302.213	5.17933	98	801
23	66.9719	301.997	4.88455	98	839
24	67.638	300.928	6.42783	98	878
25	67.6573	302.254	6.45316	98	919
26	67.8129	302.739	6.59542	98	957
27	86.3783	291.33	9.14039	98	999
22	148.294	507.934	9.94931	99	806
23	154.778	494.765	10.0859	99	843
24	156.352	492.76	8.05467	99	881
25	158.243	469.254	4.57282	99	918
26	156.31	468.062	4.84389	99	956
27	155.975	470.984	2.5	99	995
28	139.241	438.61	8.11477	99	1034
22	364.254	350.202	7.02771	100	810
23	367.42	350.384	6.21242	100	846
24	374.875	354.715	5.76081	100	884
25	375.641	354.671	6.17496	100	923
26	358.8	367.852	5.10472	100	961
22	492.813	439.599	17.3784	101	819
23	492.792	438.029	16.4108	101	857
24	489.609	439.963	13.3174	101	896
22	337.739	305.955	20.2582	102	820
23	340.026	303.278	21.1871	102	858
24	340.584	300.936	18.1682	102	898
25	338.998	301.361	19.2472	102	936
26	339.092	301.462	16.1446	102	973
22	338.403	115.415	22.5	103	822
23	339.631	112.591	22.5	103	860
24	341.826	104.159	22.5	103	899
25	331.726	82.601	14.5134	103	930
26	316.107	72.3887	16.0954	103	970
27	340.391	38.1417	17.8425	103	1008
23	220.139	235.677	2.5	104	830
24	219.896	235.568	2.5	104	868
25	219.707	235.721	5.57384	104	908
23	470.522	215.171	14.3111	105	849
24	471.484	213.384	14.9185	105	890
25	476.253	210.626	9.83336	105	916
26	477.857	210.058	9.85134	105	953
27	476.28	208.714	11.5671	105	1007
28	478.764	196.131	12.2329	105	1042
29	497.153	166.148	15.0276	105	1073
23	262.232	332.578	17.3139	106	856
24	238.572	361.163	10.0086	106	882
24	395.952	289.73	8.96559	107	887
25	397.007	290.674	7.54371	107	925
26	396.715	292.355	8.19841	107	963
27	396.672	290.166	8.51901	107	1003
28	406.425	271.436	7.71329	107	1037
29	405.841	268.194	7.15374	107	1069
24	249.309	369.862	14.4873	108	894
25	284.31	384.055	10.3795	108	927
25	42.3541	211.862	7.56187	109	911
26	59.4968	219.908	9.51766	109	948
27	62.6324	233.688	7.9592	109	986
28	70.272	237.612	9.67537	109	1023
29	66.7723	237.525	3.96533	109	1056
30	60.9227	241.193	2.5	109	1082
31	65.7369	239.703	2.5	109	1111
25	40.0853	15.9722	22.5	110	937
26	40.3931	8.95573	17.5468	110	966
27	40.4456	2.98023e-08	13.6704	110	1005
28	40.0863	2.98023e-08	12.5095	110	1039
29	39.8133	2.98023e-08	13.4358	110	1071
30	36.6068	2.98023e-08	8.07651	110	1085
25	13.6894	271.978	22.5	111	939
26	14.4328	273.512	22.5	111	979
26	409.58	176.918	7.70244	112	951
27	410.753	178.52	7.54983	112	991
28	410.217	178.557	7.76385	112	1027
29	416.488	171.439	7.83714	112	1061
30	417.666	169.371	7.85604	112	1091
31	417.72	168.19	7.75377	112	1118
32	421.556	161.662	7.18247	112	1145
33	428.738	121.586	14.5229	112	1187
34	432.163	120.379	17.3605	112	1218
35	431.448	120.394	18.0315	112	1249
36	431.659	122.871	18.4741	112	1279
37	433.427	121.941	18.3365	112	1315
38	434.735	122.664	21.5333	112	1352
39	436.253	129.721	22.5	112	1388
40	435.305	134.513	22.5	112	1421
26	357.059	388.903	7.88326	113	964
27	357.581	387.736	5.63709	113	1001
28	356.587	389.247	4.99451	113	1036
29	357.335	384.625	7.7753	113	1070
30	357.712	384.549	8.02054	113	1098
31	358.85	383.804	9.44735	113	1126
26	164.436	47.138	22.5	114	976
27	126.738	39.3472	5.07963	114	984
27	341.756	227.159	10.1005	115	994
28	342.204	227.694	10.3133	115	1030
28	58.4638	117.39	6.32065	116	1022
29	76.5105	124.181	5.4875	116	1055
30	75.4626	126.106	6.63149	116	1087
31	76.0256	124.963	6.02727	116	1114
32	76.2772	124.768	6.29987	116	1142
33	76.9663	125.447	6.43518	116	1171
34	76.8732	126.104	6.28218	116	1205
35	76.6047	126.831	6.86543	116	1238
36	78.1833	123.636	4.96735	116	1262
37	78.1265	125.18	6.8599	116	1299
38	79.024	123.897	5.39062	116	1327
39	83.6001	117.914	6.6774	116	1366
40	86.4535	118.819	6.42957	116	1397
41	83.8109	120.419	6.73793	116	1431
42	81.8055	121.192	6.93608	116	1465
43	81.9137	120.914	7.09138	116	1491
44	82.1046	119.138	6.92906	116	1520
45	82.3019	118.68	7.00432	116	1552
46	82.0564	118.997	7.27753	116	1584
47	82.9151	117.686	7.19238	116	1610
48	86.2644	114.036	7.20379	116	1644
49	86.3346	117.672	7.37402	116	1681
50	82.642	119.781	7.15289	116	1715
51	85.6712	119.226	6.8655	116	1751
52	87.2824	117.415	7.33046	116	1786
53	87.62	113.764	7.56457	116	1821
54	84.8176	114.971	7.74463	116	1862
55	86.5515	113.975	7.90333	116	1906
56	87.1982	115.921	8.06006	116	1950
57	86.1803	117.663	8.23501	116	1996
58	81.5077	120.479	8.22283	116	2040
59	80.7653	120.229	7.82703	116	2075
60	85.5856	114.485	8.16937	116	2111
61	87.3071	113.985	8.4254	116	2145
62	82.5988	116.833	8.55522	116	2177
63	83.5611	117.496	8.83975	116	2219
64	83.7829	118.525	9.06658	116	2261
65	77.0042	124.372	9.76819	116	2302
66	76.3071	127.14	9.56038	116	2343
67	76.9616	124.7	9.83584	116	2387
68	77.252	122.945	9.98096	116	2429
69	77.4895	122.409	10.171	116	2472
70	76.8203	125.608	10.1743	116	2516
71	76.6618	126.165	10.2506	116	2561
72	75.9588	126.622	10.5146	116	2606
28	240.775	306.356	22.5	117	1049
29	253.629	314.234	10.0545	117	1064
30	247.791	507.934	2.5	118	1093
31	246.218	507.934	5.35846	118	1120
32	275.396	502.934	8.5108	118	1153
33	308.962	471.149	10.0153	118	1185
30	244.475	455.866	7.43771	119	1095
31	235.153	450.187	9.1373	119	1123
32	247.041	457.214	7.66904	119	1150
33	248.309	452.24	6.83928	119	1181
34	251.037	446.428	3.69877	119	1213
35	251.363	444.534	6.90089	119	1245
36	251.352	445.076	6.45486	119	1272
37	256.052	445.546	5.91821	119	1309
38	256	444.075	5.04661	119	1345
30	424.048	491.858	10.3038	120	1099
31	413.169	490.685	22.5	120	1136
32	414.412	488.557	22.5	120	1166
33	434.37	483.494	22.5	120	1199
30	491.866	318.536	17.3692	121	1104
31	466.306	287.684	8.62684	121	1125
32	463.231	257.956	7.84379	121	1152
30	11.6538	131.392	22.5	122	1105
31	12.9839	130.609	22.5	122	1133
32	9.04345	128.09	22.5	122	1162
33	4.37081	129.245	22.5	122	1195
34	2.98023e-08	130.248	22.5	122	1228
31	153.927	400.944	7.41987	123	1122
32	155.895	396.972	4.69526	123	1148
33	153.895	397.872	6.15874	123	1179
34	153.868	381.022	10.2345	123	1215
35	152.121	382.598	10.8656	123	1246
36	153.621	381.389	10.6053	123	1274
37	156.602	376.953	8.52515	123	1307
38	152.556	365.605	5.4532	123	1340
32	52.4948	24.2944	10.9686	124	1143
33	53.1128	23.1431	10.324	124	1173
34	48.6095	2.98023e-08	5.13654	124	1200
35	49.3395	2.98023e-08	6.22543	124	1232
32	487.406	259.195	10.4262	125	1154
33	507.934	258.92	10.901	125	1184
32	354.737	227.546	12.3575	126	1156
33	355.157	227.243	12.8037	126	1186
34	355.311	224.572	12.058	126	1217
35	356.113	221.971	12.5169	126	1248
36	356.343	224.751	12.6512	126	1278
[truncated: 4,290 more rows]
