# Supplementary material for: Functional visualization of NK cell-mediated killing of metastatic single tumor cells
Source: eLife journal article supplement (doi:10.7554/elife.76269), 2022-02-03
Supplement: supp [file nk_pos_1.xlsx]

## Sheet: Sheet1
1	199.975	222.788	5.5	1	0
2	199.801	222.775	5.5	1	48
3	200.075	222.864	5.5	1	97
4	200.525	223.019	5.5	1	146
5	200.633	222.783	5.5	1	196
6	200.762	222.802	5.5	1	247
7	200.518	223.625	5.5	1	299
8	201.949	218.217	5.5	1	350
9	202.162	218.307	5.5	1	404
10	201.598	218.063	5.5	1	459
11	203.367	217.022	5.5	1	514
12	203.482	216.964	5.5	1	569
13	202.81	216.864	5.5	1	626
14	202.994	217.205	5.5	1	685
15	204.226	215.607	5.5	1	743
16	202.421	217.687	5.5	1	804
17	202.723	218.082	5.5	1	866
18	203.006	218.082	5.5	1	928
19	201.356	221.871	5.5	1	988
20	202.5	217.808	5.5	1	1050
21	201.846	218.227	5.5	1	1108
22	200.529	217.433	7.22651	1	1165
23	200.418	217.604	8.13706	1	1223
24	200.525	217.536	8.15268	1	1283
25	200.681	217.649	8.74849	1	1341
1	54.9526	61.4812	11.3684	2	1
2	55.8316	62.4415	11.7864	2	49
3	56.4485	61.5748	11.7514	2	98
4	56.8971	62.3917	11.6854	2	148
5	56.955	63.7581	12.0133	2	199
6	56.6573	63.9747	12.3332	2	249
7	56.4969	64.185	12.7386	2	301
8	56.0153	63.9352	13.0283	2	352
9	57.1147	63.9499	13.1045	2	407
10	56.8916	64.0279	13.3758	2	462
11	58.0597	64.725	12.8535	2	517
12	57.6817	64.0573	13.2502	2	572
13	57.1834	63.1932	13.0546	2	629
14	58.6041	62.673	12.8068	2	690
15	57.6424	63.6753	12.9164	2	748
16	56.8823	64.1599	13.2371	2	809
17	56.4222	64.2961	13.5956	2	870
18	56.5799	63.8366	13.536	2	932
19	56.8206	63.086	13.4985	2	992
20	57.4371	63.1504	13.528	2	1054
21	56.9137	63.7005	13.8202	2	1112
22	57.3862	64.3995	14.1062	2	1169
23	57.9419	65.2563	13.8139	2	1226
24	56.8004	63.9696	14.3672	2	1310
25	56.4594	63.2275	14.6164	2	1370
26	57.2616	62.0567	14.4056	2	1430
27	57.5666	62.4952	14.6519	2	1489
28	57.9558	60.5379	14.5677	2	1548
29	56.8454	57.5601	13.1566	2	1581
30	57.7361	58.3169	14.1296	2	1639
31	57.8431	60.0229	14.6297	2	1723
32	57.6883	61.9232	15.171	2	1780
33	57.4367	62.2798	15.5438	2	1837
34	57.8857	61.0922	15.4825	2	1893
35	57.1197	62.3016	15.6132	2	1948
36	56.8029	62.9501	15.8955	2	2001
37	56.9042	63.0198	16.3217	2	2056
38	57.166	62.9338	16.3866	2	2108
39	57.3883	62.9467	16.7772	2	2164
40	57.6465	63.2594	17.0067	2	2220
41	57.7579	63.6388	16.95	2	2276
42	58.9263	64.9632	16.5317	2	2331
43	61.5869	67.2189	15.6391	2	2380
44	62.5092	67.9605	15.0443	2	2434
45	62.938	68.8399	15.0105	2	2486
46	62.6501	68.3535	15.2409	2	2538
47	61.3222	66.2111	16.961	2	2594
48	59.1898	65.784	17.7342	2	2647
49	59.7032	65.9943	17.4324	2	2701
50	62.7879	69.5381	16.0182	2	2750
51	63.6852	69.4591	15.7949	2	2801
52	62.8883	70.6061	16.3601	2	2856
53	60.9405	67.5524	17.9848	2	2907
54	60.181	64.2846	18.0434	2	2959
55	60.1026	63.6503	17.6164	2	3014
56	59.2726	64.6821	18.283	2	3068
57	59.1784	65.3904	18.1327	2	3125
58	57.86	62.0178	17.1394	2	3179
59	58.2088	59.3577	15.9037	2	3232
60	57.023	58.8532	15.5452	2	3287
61	58.3436	59.3019	16.1412	2	3338
62	59.0193	59.8865	16.4032	2	3390
63	59.1795	60.8064	17.1232	2	3447
64	57.9614	59.3311	15.7374	2	3501
65	50.0926	57.9871	15.2403	2	3554
66	45.5496	61.7615	16.273	2	3601
67	45.5728	60.6523	16.7015	2	3649
68	48.7624	57.0522	16.0624	2	3697
69	47.5967	53.7027	15.8436	2	3744
70	46.5087	57.6969	17.2021	2	3792
71	47.3311	56.3946	17.0744	2	3839
72	46.5045	65.158	18.1534	2	3886
73	45.5876	63.8491	18.204	2	3936
74	45.6598	63.4952	18.187	2	3985
75	44.8209	62.9926	18.0057	2	4034
76	45.0002	63.4071	17.8818	2	4083
77	45.7716	63.6644	18.2708	2	4127
78	46.4883	64.5386	18.5619	2	4173
79	45.9323	64.42	18.9272	2	4218
80	45.8668	63.6531	18.7884	2	4264
81	46.4877	61.514	18.688	2	4310
82	45.9936	63.6074	19.226	2	4354
83	46.5776	64.8687	19.2158	2	4396
84	46.6013	64.5701	19.8893	2	4436
85	46.3609	64.8507	20.1178	2	4476
86	46.4669	65.4071	20.4272	2	4514
87	46.5	65.5861	20.6101	2	4552
88	46.5582	65.6725	20.6428	2	4590
89	47.3797	67.2392	20.8461	2	4626
90	48.2564	68.6327	20.9309	2	4661
91	47.2514	67.1105	21.2547	2	4695
92	47.2085	67.4233	21.3872	2	4730
93	47.3468	67.272	21.5193	2	4764
94	46.9615	67.0301	21.5506	2	4798
95	47.6248	67.7368	21.5303	2	4832
96	47.6599	67.7608	22.1771	2	4868
97	46.8365	66.4069	21.9299	2	4901
98	47.1702	67.0953	21.9546	2	4931
99	47.465	68.1204	22.242	2	4964
100	48.9863	71.1136	21.2543	2	4995
101	48.4824	70.6574	22.156	2	5028
102	48.6136	70.4234	22.7015	2	5060
103	48.3337	69.7804	21.8305	2	5093
104	47.2221	66.7354	21.4592	2	5125
105	47.3773	66.598	21.7694	2	5159
106	47.8926	68.9892	22.5985	2	5191
107	50.6076	47.0217	20.912	2	5222
108	54.3215	44.5494	20.3628	2	5253
109	55.7847	42.3015	20.8112	2	5283
110	56.5398	41.8341	20.6472	2	5314
111	56.9331	41.6169	20.7049	2	5344
112	56.7156	42.1481	20.739	2	5375
113	56.6355	42.5778	20.3328	2	5406
114	56.911	41.145	21.09	2	5436
115	58.1585	38.7949	21.8964	2	5465
116	61.0278	34.6353	25.5	2	5509
117	61.9044	33.9561	25.5	2	5540
118	62.2816	33.6898	25.5	2	5569
119	62.797	33.3557	25.5	2	5599
120	64.0141	31.7181	25.5	2	5627
121	65.4677	31.3698	25.5	2	5654
122	67.0996	30.5127	25.5	2	5682
123	65.0003	32.547	25.5	2	5711
124	65.6758	31.3433	25.5	2	5736
125	63.4986	31.8153	25.5	2	5763
126	68.4247	31.3334	25.5	2	5791
127	69.4177	31.2274	25.5	2	5818
128	68.2605	31.9738	25.5	2	5848
129	64.5864	34.0921	25.5	2	5877
130	65.1695	34.3514	25.5	2	5907
131	67.4642	32.6549	25.5	2	5937
132	68.2992	33.3959	25.5	2	5966
133	67.6439	32.9523	25.5	2	5997
134	64.7652	34.9935	25.5	2	6028
135	65.4119	34.3182	25.5	2	6056
136	66.191	33.7471	25.5	2	6087
137	68.9695	33.6803	25.5	2	6118
138	69.4193	33.1284	25.5	2	6146
139	68.6387	33.096	25.5	2	6173
140	65.362	30.8382	25.5	2	6203
141	64.343	29.5644	25.5	2	6233
142	67.4133	32.0434	25.5	2	6261
143	69.1384	32.6577	25.5	2	6290
1	82.4604	71.0303	11.9178	3	2
2	81.2567	69.2298	11.7744	3	50
3	81.6666	68.5983	11.9365	3	99
4	81.3458	67.4928	12.546	3	149
5	81.6342	67.3636	11.7065	3	198
6	81.4073	68.0811	12.4529	3	250
7	80.7528	68.6362	12.8323	3	302
8	81.8011	68.6178	12.8552	3	353
9	85.1257	66.9364	10.1034	3	406
10	86.2278	65.9128	8.23432	3	460
11	86.6443	66.009	8.27942	3	515
12	102.596	48.8629	8.25985	3	570
13	103.146	49.101	8.21894	3	627
14	101.865	48.7483	8.52834	3	686
15	94.7856	45.9633	8.17514	3	744
16	93.0688	44.6435	9.055	3	805
17	97.8921	47.5309	9.4244	3	867
18	99.9524	48.0832	9.29512	3	929
19	88.9645	28.4255	11.4261	3	989
20	87.716	33.3874	10.2169	3	1051
21	89.6618	25.4797	10.9181	3	1109
22	89.5346	23.9364	10.8929	3	1166
23	89.9417	24.6248	11.5762	3	1224
24	90.1063	24.1055	11.5312	3	1284
25	90.7961	23.4505	13.0589	3	1344
26	90.8278	22.9141	14.3536	3	1429
27	90.227	23.1008	14.6525	3	1488
28	90.8165	24.2333	14.8329	3	1546
29	90.5783	25.0902	13.9136	3	1580
30	89.5416	22.9179	11.8135	3	1638
31	89.7115	23.2084	11.7526	3	1696
32	89.6923	24.4152	12.2236	3	1753
33	90.2602	23.7146	13.968	3	1810
34	86.2529	18.7416	15.6955	3	1891
35	94.2014	2.98023e-08	25.5	3	1959
36	92.9807	2.98023e-08	25.5	3	2014
37	93.5027	2.98023e-08	25.5	3	2068
38	92.9649	2.98023e-08	25.5	3	2123
39	93.2365	2.98023e-08	25.5	3	2179
41	89.1008	30.681	16.1539	3	2273
1	300.875	67.7667	5.5	4	3
2	301.497	67.8447	5.5	4	51
3	301.298	67.9932	5.5	4	100
4	301.345	67.9895	6.79252	4	151
5	300.118	67.9399	7.22702	4	201
6	281.319	65.7169	10.4586	4	252
7	266.944	56.983	7.90376	4	306
8	266.119	56.5137	7.94695	4	356
9	282.986	66.3425	11.5273	4	410
10	290.365	61.4895	8.68193	4	464
12	290.636	61.6984	9.56172	4	575
13	289.745	59.814	7.81785	4	632
14	290.016	60.2356	8.58633	4	692
15	289.573	59.4489	7.29629	4	750
16	289.677	59.3848	8.09263	4	811
17	290.377	61.142	9.50197	4	873
19	289.635	59.9543	9.18974	4	995
1	354.075	200.175	8.21049	5	4
2	354.803	198.032	9.30595	5	53
3	354.438	195.142	5.5	5	101
4	354.016	194.292	5.5	5	150
5	353.732	193.84	5.5	5	200
6	355.245	195.025	5.5	5	251
7	355.885	196.309	5.5	5	305
8	355.569	195.544	5.5	5	355
9	354.758	191.998	5.5	5	408
10	354.432	190.695	5.5	5	463
11	354.946	191.22	5.5	5	519
12	355.869	193.098	5.5	5	574
13	356.231	194.493	5.5	5	631
14	356.595	194.089	5.5	5	691
15	357.918	196.579	5.5	5	749
16	354.204	191.468	5.5	5	810
17	354.66	193.964	5.5	5	872
18	351.724	185.717	5.5	5	934
19	350.922	183.874	5.5	5	994
1	431.617	150.349	11.5892	6	5
2	431.334	151.1	11.6469	6	52
3	432.337	150.963	11.9623	6	103
4	432.383	151.207	11.6774	6	152
5	433.317	151.429	12.2403	6	202
6	433.234	151.494	12.3044	6	253
7	433.111	151.675	12.8761	6	307
8	434.27	151.853	12.7764	6	358
9	434.774	152.4	13.3407	6	411
10	435.471	152.701	13.7102	6	466
11	435.464	152.924	13.7072	6	520
12	433.934	152.147	13.1135	6	576
13	433.849	152.328	12.9342	6	634
14	433.538	151.88	12.9737	6	694
15	434.758	152.346	12.7747	6	753
16	435.504	152.771	13.4059	6	814
17	433.739	160.41	13.2322	6	876
18	437.209	166.838	12.0972	6	936
19	437.308	165.91	13.5102	6	997
1	299.402	224.906	13.0943	7	6
2	303	231.328	16.9553	7	79
3	301.43	239.413	18.9654	7	130
4	292.86	237.265	20.6519	7	181
5	287.269	239.529	25.5	7	243
6	288.722	244.579	25.5	7	294
7	291.164	246.739	25.5	7	345
8	287.962	246.234	25.5	7	398
9	287.579	246.375	25.5	7	453
10	287.722	246.426	25.5	7	508
11	287.914	247.375	25.5	7	564
12	288.144	246.6	25.5	7	621
13	287.85	247.159	25.5	7	680
14	286.633	247.452	25.5	7	739
15	287.298	245.921	25.5	7	799
16	287.471	246.175	25.5	7	861
17	287.533	246.294	25.5	7	923
18	287.514	246.427	25.5	7	983
19	287.402	246.061	25.5	7	1045
20	287.666	246.73	25.5	7	1103
22	287.526	245.757	25.5	7	1218
23	287.33	245.803	25.5	7	1277
24	288.085	246.35	25.5	7	1336
25	288.008	245.87	25.5	7	1398
27	286.492	245.728	25.5	7	1513
28	284.532	246.995	25.5	7	1573
29	286.225	245.757	25.5	7	1632
30	286.123	245.582	25.5	7	1690
31	286.793	245.308	25.5	7	1748
32	286.281	245.1	25.5	7	1804
33	286.296	244.879	25.5	7	1860
35	278.507	219.09	10.775	7	1924
36	277.391	209.192	10.6552	7	1979
37	277.125	209.115	11.0107	7	2031
38	277.16	208.832	11.5878	7	2084
39	278.705	207.009	10.2705	7	2139
40	281.271	207.914	10.0236	7	2196
1	211.539	333.808	5.5	8	7
2	212.568	333.821	5.5	8	54
3	212.383	334.02	5.5	8	104
4	212.287	334.198	5.5	8	153
5	212.495	334.776	5.5	8	203
6	212.749	334.725	5.5	8	254
7	210.207	333.82	5.5	8	308
8	212.557	334.491	5.5	8	359
9	211.358	334.383	5.5	8	412
10	206.192	332.125	5.5	8	467
11	205.294	333.212	5.5	8	521
12	206.032	332.182	5.5	8	577
13	206.041	332.143	5.5	8	635
14	209.233	334.1	5.5	8	695
15	221.262	320.683	9.89608	8	761
16	215.504	319.772	6.79741	8	819
17	208.532	317.085	5.5	8	878
18	201.289	316.375	9.02636	8	941
20	230.051	318.284	10.3637	8	1064
21	229.824	320.944	10.7861	8	1120
22	232.25	319.271	10.3363	8	1178
23	230.884	314.516	10.1905	8	1236
24	230.874	314.555	10.2196	8	1296
25	223.359	320.145	12.5578	8	1356
26	220.585	318.939	11.4072	8	1414
27	205.986	331.19	12.6162	8	1475
28	206.993	321.367	10.4798	8	1530
29	204.081	330.523	13.428	8	1593
30	220.519	319.466	12.8654	8	1651
1	236.672	353.42	5.5	9	8
2	237.545	353.355	5.5	9	55
3	234.896	352.281	5.5	9	105
4	233.2	351.168	5.5	9	154
5	233.556	351.21	5.5	9	204
6	234.127	351.111	5.5	9	255
7	234.894	350.827	5.5	9	309
8	235.285	351.015	5.5	9	360
9	234.749	350.991	5.5	9	413
10	234.219	351.63	5.5	9	468
11	233.948	351.661	5.5	9	522
12	234.358	351.384	5.5	9	578
13	234.729	351.287	5.5	9	636
14	235.295	351.298	5.5	9	696
15	234.527	351.054	5.5	9	754
16	234.315	351.37	5.5	9	816
17	233.909	351.671	5.5	9	879
18	233.452	351.679	5.5	9	939
19	234.234	350.528	5.5	9	1000
20	233.835	350.648	7.08906	9	1059
21	234.826	350.831	6.81258	9	1117
22	234.919	350.411	6.77734	9	1175
23	234.913	350.561	7.34906	9	1232
24	234.395	350.635	7.54415	9	1293
25	234.027	350.423	7.79281	9	1351
26	234.015	350.296	8.3097	9	1412
27	234.183	350.043	8.50117	9	1470
28	234.467	350.301	8.45146	9	1528
29	234.776	350.521	8.59838	9	1588
30	234.423	350.035	8.54025	9	1646
31	234.425	350.67	8.52337	9	1704
32	233.727	350.755	9.10424	9	1761
33	234.203	350.88	9.43888	9	1820
34	234.316	350.331	9.59215	9	1874
35	241.121	352.949	9.07207	9	1929
36	241.54	352.981	8.78319	9	1981
37	241.064	353.128	9.23391	9	2035
38	240.63	353.222	9.66853	9	2091
39	234.766	350.951	10.1997	9	2145
40	234.826	351.636	10.4662	9	2201
41	239.997	354.828	10.2759	9	2256
42	239.455	354.722	10.338	9	2313
43	240.286	355.045	10.6996	9	2365
44	239.98	354.527	10.6924	9	2419
46	249.73	360.217	17.9993	9	2552
47	251.384	362.66	18.9797	9	2606
48	251.461	366.229	20.8416	9	2662
49	252.474	365.525	21.5397	9	2717
50	251.621	365.849	21.0178	9	2766
51	251.657	365.804	22.9845	9	2816
52	250.393	365.067	19.9506	9	2870
53	250.63	365.574	20.2547	9	2919
54	252.748	366.566	20.8463	9	2971
55	251.77	368.706	22.2575	9	3028
56	250.445	370.922	25.5	9	3098
1	230.357	439.57	5.5	10	9
2	232.605	443.388	5.5	10	56
3	234.003	446.012	5.5	10	106
4	234.805	444.656	5.5	10	155
5	236.105	449.818	5.5	10	205
6	235.256	451.258	5.5	10	256
7	234.963	451.29	5.5	10	310
8	234.606	451.492	5.5	10	361
9	234.169	445.766	5.5	10	414
10	235.683	450.517	5.5	10	469
11	234.327	444.352	6.98574	10	523
12	236.095	447.137	5.5	10	579
13	235.204	450.91	5.5	10	637
14	236.859	465.138	5.5	10	697
15	239.535	467.891	8.80051	10	759
16	239.83	468.126	9.41751	10	823
17	239.272	468.046	9.55772	10	885
18	239.381	467.45	9.61867	10	946
19	239.925	466.817	9.17867	10	1002
20	239.624	466.9	9.08031	10	1061
21	239.838	466.95	9.77225	10	1123
22	239.258	467.324	10.2011	10	1181
23	238.82	467.478	10.3033	10	1239
24	236.425	466.931	7.66878	10	1292
25	239.665	467.45	10.6424	10	1354
26	240.882	466.951	10.8385	10	1416
27	240.514	466.468	10.5672	10	1474
28	240.264	466.775	10.8045	10	1532
29	239.088	467.04	10.7882	10	1591
30	239.107	467.502	10.9507	10	1649
31	239.117	467.346	11.439	10	1708
32	239.981	467.539	11.8818	10	1767
33	240.166	467.16	11.8206	10	1824
34	239.956	466.235	11.4088	10	1875
35	239.749	466.47	11.4194	10	1931
36	239.415	466.59	11.3876	10	1984
37	238.955	466.399	11.9824	10	2043
38	239.551	467.311	12.3549	10	2095
39	240.255	467.643	12.5261	10	2149
40	240.19	467.255	13.1528	10	2206
41	241.025	467.453	12.6578	10	2261
42	240.585	467.297	12.7909	10	2318
43	240.604	467.449	13.1115	10	2368
44	240.463	468.407	13.1623	10	2421
45	240.282	468.452	13.3469	10	2474
46	241.028	469.071	13.8618	10	2526
47	240.643	468.744	14.0856	10	2580
48	230.657	470.118	16.2334	10	2660
49	221.283	475.23	18.2672	10	2715
50	220.996	475.229	19.3786	10	2764
51	212.834	467.223	25.5	10	2835
1	159.462	474.555	5.5	11	10
2	159.104	472.002	5.5	11	57
3	159.69	470.951	5.5	11	107
4	160.092	472.38	5.5	11	156
5	160.297	471.394	5.5	11	206
6	159.765	473.187	5.5	11	257
7	159.734	472.219	5.5	11	311
8	159.771	472.658	5.5	11	362
9	160.218	471.505	5.5	11	415
10	160.16	473.105	7.36484	11	470
11	160.993	476.426	7.13695	11	524
12	162.139	478.606	8.1264	11	580
13	163.201	480.317	7.83074	11	640
14	160.107	473.462	5.5	11	698
15	160.327	473.013	5.5	11	756
16	160.776	470.457	7.08488	11	820
17	161.072	470.623	7.66208	11	882
18	160.957	472.342	7.71934	11	942
19	160.91	471.865	7.40543	11	1003
20	160.899	469.571	7.82478	11	1062
21	161.327	468.019	8.4281	11	1118
22	161.555	467.316	8.90258	11	1176
23	160.554	469.413	8.62435	11	1234
24	160.542	469.887	8.58409	11	1295
25	161.238	468.093	9.35527	11	1355
26	160.636	472.344	8.77242	11	1413
27	160.427	471.079	8.82587	11	1472
28	160.601	469.984	9.51163	11	1533
29	160.634	468.772	9.67142	11	1592
30	160.001	471.177	9.47207	11	1650
31	160.002	471.83	9.69271	11	1709
32	160.388	472.127	9.93229	11	1764
33	160.816	470.918	10.0136	11	1821
34	160.919	472.187	10.1772	11	1876
35	161.106	469.027	10.6899	11	1932
36	160.199	471.982	10.4799	11	1985
37	160.05	471.961	10.6177	11	2039
38	160.444	475.126	10.773	11	2092
39	161.759	477.703	11.1584	11	2146
40	162.168	477.706	11.4975	11	2203
41	161.947	476.826	11.2283	11	2258
42	161.486	476.046	11.3667	11	2315
43	161.526	477.347	11.6155	11	2367
44	162.007	478.579	11.7967	11	2422
45	161.323	475.115	11.6274	11	2472
46	161.651	473.3	11.9172	11	2527
47	162.225	472.918	12.4538	11	2581
48	162.399	473.092	12.4761	11	2634
49	162.606	473.284	12.5637	11	2687
50	162.871	471.422	13.0867	11	2739
51	162.085	474.396	12.8172	11	2790
52	162.56	472.653	13.0324	11	2845
53	162.765	472.473	13.1616	11	2895
54	163.161	474.033	13.1948	11	2949
55	162.931	473.539	13.0763	11	3003
56	163.363	471.863	13.4076	11	3057
57	163.018	473.591	13.3178	11	3114
58	163.048	471.448	13.4644	11	3169
59	162.309	474.307	13.0246	11	3223
60	162.762	473.018	13.2845	11	3278
61	163.186	473.547	13.2234	11	3330
62	164.507	469.536	13.8062	11	3383
63	170.401	464.674	13.908	11	3438
64	170.428	464.526	13.4136	11	3492
66	124.547	471.224	25.5	11	3630
1	169.027	493.044	5.5	12	11
2	168.574	492.675	5.5	12	58
3	169.972	492.879	5.5	12	108
4	176.204	492.89	5.5	12	157
5	180.462	488.419	8.72893	12	209
6	185.294	486.666	5.5	12	258
7	184.505	472.736	8.6179	12	314
8	195.319	474.107	7.07981	12	364
9	194.838	474.113	7.02011	12	416
10	194.692	474.164	7.86459	12	471
11	204.002	478.912	9.09787	12	525
12	208.098	481.155	8.31659	12	581
13	216.515	483.508	5.5	12	638
14	220.297	484.561	5.5	12	699
15	219.11	483.89	5.5	12	757
16	217.202	483.509	5.5	12	818
17	213.294	483.263	5.5	12	881
18	210.317	482.32	7.75145	12	943
19	208.038	481.111	8.26151	12	1004
20	209.626	482.213	7.98127	12	1063
21	210.418	482.819	7.98558	12	1119
22	217.855	483.079	8.0267	12	1177
23	221.002	481.281	8.43795	12	1235
1	235.478	332.614	7.49148	13	12
2	236.611	332.725	8.10045	13	59
3	236.353	332.811	8.1466	13	109
4	235.483	333.012	7.94092	13	158
5	235.631	333.31	8.37886	13	207
6	235.554	333.638	8.45808	13	259
7	236.206	333.733	8.9272	13	312
8	236.356	333.788	9.53887	13	365
9	237.194	333.674	9.50701	13	417
10	237.563	334.183	9.52022	13	472
11	237.44	334.409	9.80741	13	526
12	237.062	334.649	9.47464	13	582
13	236.544	334.483	9.3052	13	641
14	236.372	334.299	9.85861	13	700
15	237.441	334.131	8.9903	13	758
16	237.224	334.189	9.46822	13	821
17	237.412	334.142	9.91434	13	883
18	237.467	333.856	10.2205	13	944
19	236.42	334.095	10.1509	13	1005
20	236.215	334.068	10.2798	13	1065
21	236.213	334.029	10.3561	13	1121
22	237.053	333.785	10.7063	13	1179
23	237.344	333.866	10.6733	13	1237
24	237.708	333.547	10.9254	13	1297
25	237.359	333.25	11.1492	13	1352
26	236.456	333.403	10.9958	13	1415
27	236.222	333.046	11.3618	13	1473
28	235.738	333.338	11.7423	13	1531
29	236.292	333.459	11.7055	13	1590
30	236.533	333.266	12.0202	13	1652
31	237.453	333.025	11.7159	13	1707
32	237.115	332.802	12.1376	13	1765
33	236.882	333.123	12.1821	13	1822
34	236.246	333.167	12.3943	13	1878
35	236.106	333.715	12.4383	13	1934
36	236.156	333.379	12.4384	13	1987
37	236.655	333.212	12.7519	13	2041
38	237.412	333.443	12.7739	13	2093
39	237.804	333.335	13.0338	13	2147
40	237.548	333.235	13.1029	13	2204
41	233.158	327.806	19.5361	13	2289
42	234.697	327.611	20.4578	13	2343
43	236.648	327.542	19.9867	13	2392
44	236.53	334.95	16.9568	13	2446
45	238.534	334.825	13.8599	13	2473
46	238.705	334.945	13.9214	13	2524
47	238.406	335.166	14.0157	13	2578
48	238.453	335.157	14.318	13	2657
49	238.05	335.536	14.3372	13	2711
50	237.926	335.699	14.7428	13	2761
51	238.952	335.721	14.9121	13	2812
52	239.46	335.834	15.0135	13	2866
53	239.522	335.877	15.0676	13	2915
54	238.205	336.447	15.1753	13	2967
55	238.699	336.131	15.0098	13	3023
56	238.341	336.333	15.1895	13	3078
57	238.142	336.158	14.9496	13	3134
58	238.851	335.905	15.2587	13	3187
59	239.469	335.902	15.1751	13	3243
60	239.597	335.795	14.8985	13	3297
61	239.27	335.563	15.0859	13	3348
62	238.502	335.569	15.0058	13	3402
63	238.219	335.779	15.1883	13	3456
64	238.971	335.781	15.1873	13	3509
65	239.007	336.057	15.0703	13	3561
66	239.257	335.787	15.229	13	3611
67	239.547	335.415	15.6387	13	3658
68	239.173	335.313	15.587	13	3706
69	238.459	335.606	15.5837	13	3756
70	238.153	335.727	15.7691	13	3800
71	238.429	335.439	15.8994	13	3850
72	238.819	335.527	15.9526	13	3899
73	239.235	335.509	16.2386	13	3947
74	239.62	335.602	16.1291	13	3995
75	238.893	335.72	16.1157	13	4041
76	238.512	335.483	15.9854	13	4090
77	238.434	335.544	16.244	13	4136
78	239.468	335.353	16.2272	13	4182
79	238.964	335.564	16.9904	13	4226
80	239.706	335.59	16.582	13	4273
81	239.833	335.92	16.8136	13	4319
82	239.993	335.927	17.1604	13	4362
83	239.336	336.578	17.3645	13	4405
84	239.273	336.697	17.7111	13	4447
85	239.537	336.875	18.0357	13	4485
86	239.524	337.324	18.4186	13	4522
87	240.06	337.44	18.6202	13	4562
88	240.436	337.853	18.9956	13	4600
89	240.605	338.105	19.1416	13	4633
90	240.734	338.205	19.4993	13	4669
91	239.967	338.487	19.6916	13	4702
92	239.334	338.814	19.5782	13	4738
93	240.752	338.959	19.7895	13	4771
94	240.184	339.09	19.8989	13	4805
95	240.879	339.213	19.8748	13	4839
96	240.866	338.969	19.9756	13	4874
97	240.635	339.145	20.1073	13	4907
98	239.818	338.981	20.1125	13	4937
99	240.165	339.005	20.0352	13	4969
100	239.642	338.85	20.0387	13	5003
101	240.661	338.798	19.8755	13	5035
102	240.648	338.651	19.9781	13	5065
103	240.737	338.662	19.9703	13	5098
104	240.321	338.655	20.1725	13	5132
105	239.552	338.612	20.0484	13	5166
106	239.711	338.698	20.3893	13	5199
107	239.419	338.674	20.5639	13	5229
108	239.619	338.572	20.464	13	5259
109	240.27	338.545	20.6115	13	5288
110	240.474	338.178	20.8654	13	5318
111	240.29	338.151	21.2633	13	5349
112	239.705	338.297	21.232	13	5380
113	239.311	338.387	21.0593	13	5410
114	239.494	338.396	21.3021	13	5441
115	239.927	338.268	21.5036	13	5470
116	240.139	338.22	21.4966	13	5499
117	240.528	338.455	22.1829	13	5530
118	240.11	338.135	21.5415	13	5560
119	240.091	338.261	22.1676	13	5589
120	239.707	338.428	22.5304	13	5617
121	239.271	338.199	22.3542	13	5646
122	236.61	335.737	25.5	13	5689
123	238.5	338.027	25.5	13	5717
124	240.482	339.641	25.5	13	5744
125	241.126	339.202	22.804	13	5754
126	240.6	339.229	22.8669	13	5782
127	240.379	339.525	23.1466	13	5810
128	240.345	339.975	23.3959	13	5838
129	240.973	340.238	24.2211	13	5867
130	241.593	340.374	24.0221	13	5897
131	241.342	340.775	24.1292	13	5927
132	241.495	340.514	24.0134	13	5957
133	241.254	340.776	23.93	13	5988
134	240.471	340.95	25.5	13	6035
135	240.693	340.998	25.5	13	6065
136	240.759	341.205	25.5	13	6096
137	242.562	341.334	25.5	13	6126
138	242.482	341.2	25.5	13	6154
139	241.236	340.927	25.5	13	6182
140	242.294	341.07	25.5	13	6212
141	242.103	340.967	25.5	13	6241
142	240.572	341.025	25.5	13	6269
143	241.251	341.128	25.5	13	6296
144	241.412	340.814	25.5	13	6322
145	242	341.033	25.5	13	6350
146	242.182	340.818	25.5	13	6376
147	240.616	340.369	25.5	13	6405
148	240.61	340.542	25.5	13	6430
149	240.6	340.379	25.5	13	6455
150	242.072	340.464	25.5	13	6481
151	241.645	340.359	25.5	13	6506
152	242.066	340.414	25.5	13	6532
153	242.558	340.543	25.5	13	6559
154	240.94	340.403	25.5	13	6584
155	241.05	340.591	25.5	13	6608
156	240.472	340.493	25.5	13	6632
157	241.963	340.583	25.5	13	6657
158	241.471	340.507	25.5	13	6679
159	242.014	340.426	25.5	13	6702
160	241.077	340.1	25.5	13	6726
161	240.333	340.454	25.5	13	6749
162	240.756	340.479	25.5	13	6771
163	240.508	340.439	25.5	13	6792
164	241.02	340.409	25.5	13	6813
165	242.129	340.517	25.5	13	6833
166	242.65	340.554	25.5	13	6853
167	240.652	340.457	25.5	13	6873
168	240.943	340.467	25.5	13	6893
169	241.109	340.716	25.5	13	6914
170	241.478	341.114	25.5	13	6933
171	242.917	341.515	25.5	13	6953
172	243.407	341.773	25.5	13	6974
173	242.627	341.858	25.5	13	6992
174	241.92	342.031	25.5	13	7012
175	241.678	342.252	25.5	13	7029
176	241.915	342.507	25.5	13	7046
1	137.571	439.379	8.90103	14	13
2	137.787	439.754	8.94744	14	60
3	138.089	440.253	9.68948	14	112
4	138.822	440.275	10.0024	14	161
5	139.302	440.102	10.2822	14	211
6	141.423	440.747	9.90316	14	262
7	141.67	440.986	10.2142	14	316
8	142.211	442.214	9.76598	14	366
9	140.689	442.963	9.8211	14	418
10	139.927	442.665	10.3576	14	473
11	138.382	442.234	10.52	14	527
12	138.187	440.852	10.7285	14	584
13	137.976	439.413	10.5653	14	643
14	138.655	439.193	10.6423	14	701
15	137.943	438.941	10.2134	14	762
16	137.13	438.604	10.5817	14	822
17	137.21	439.148	10.6314	14	884
18	137.882	439.815	10.7296	14	945
19	138.173	439.541	10.5373	14	1006
20	137.449	439.174	10.6189	14	1066
21	138.09	438.962	11.0401	14	1122
22	138.418	439.088	11.2642	14	1180
23	138.268	438.925	11.1286	14	1238
24	137.892	439.024	11.3563	14	1298
25	137.733	438.936	11.6253	14	1353
26	137.39	438.512	12.1085	14	1417
27	137.812	438.034	12.5405	14	1476
28	138.315	438.991	12.5421	14	1534
29	138.505	438.979	12.4159	14	1594
30	139.777	438.993	12.7961	14	1653
31	138.082	438.514	12.7953	14	1710
32	138.09	438.396	12.9389	14	1766
33	138.238	438.607	13.0323	14	1823
34	137.935	438.594	13.0273	14	1879
35	138.787	438.728	13.2527	14	1935
36	140.664	439.003	13.225	14	1988
37	141.941	439.171	13.3768	14	2042
38	139.399	438.646	13.6641	14	2094
39	138.427	439.334	13.5806	14	2148
40	138.229	439.107	14.0176	14	2205
41	138.452	438.98	14.1434	14	2260
42	138.18	439.113	14.101	14	2317
43	139.039	439.38	14.4481	14	2389
44	139.851	439.624	14.7693	14	2444
45	140.261	440.004	15.0056	14	2497
46	140.514	440.285	15.4466	14	2550
47	140.751	440.783	15.8172	14	2605
48	137.52	439.312	15.5402	14	2659
49	137.301	439.713	16.3497	14	2713
50	138.953	439.04	16.7812	14	2763
51	141.108	437.14	16.5076	14	2814
52	141.132	441.095	16.4375	14	2868
53	139.614	442.294	15.6529	14	2917
54	138.903	441.813	16.0918	14	2969
55	138.482	442.262	15.5498	14	3025
56	139.338	442.458	15.4435	14	3080
57	140.553	441.611	15.4682	14	3136
58	141.34	441.882	15.8763	14	3189
59	141.687	442.387	15.8647	14	3245
60	142.459	444.09	15.7392	14	3299
61	142.472	444.664	15.7404	14	3350
62	142.8	444.868	15.7801	14	3404
63	143.295	444.875	15.6848	14	3458
64	143.599	444.744	15.723	14	3511
65	143.135	444.272	15.8384	14	3563
66	142.9	444.405	16.0832	14	3613
67	143.139	443.83	16.0715	14	3660
68	143.848	443.461	16.3076	14	3708
69	144.373	443.275	16.5386	14	3758
70	146.441	442.585	16.3599	14	3802
71	147.433	442.404	16.1971	14	3851
72	147.041	442.274	16.361	14	3900
73	146.531	442.21	16.593	14	3948
74	147.145	442.193	16.6683	14	3997
75	147.866	442.2	16.6669	14	4042
76	147.607	442.16	16.3997	14	4092
77	145.057	442.434	17.3062	14	4138
78	145.29	442.435	16.9188	14	4184
79	145.817	442.678	17.3196	14	4228
80	145.02	442.849	17.204	14	4275
81	145.314	443.311	17.2074	14	4321
82	145.57	443.319	17.5831	14	4364
83	145.931	443.469	17.9211	14	4406
84	145.442	443.633	18.4628	14	4449
85	144.308	444.725	18.8476	14	4487
86	144.476	444.162	19.1297	14	4524
87	144.67	443.527	19.3123	14	4564
88	146.287	444.268	19.1002	14	4601
89	148.38	444.391	19.004	14	4634
90	144.535	444.154	20.081	14	4671
91	148.264	444.631	19.3735	14	4704
92	144.801	444.536	20.7028	14	4740
93	142.601	444.333	20.8338	14	4773
94	148.66	445.355	19.7747	14	4807
95	147.054	445.303	20.0177	14	4842
96	146.362	445.311	20.3066	14	4876
97	146.103	445.294	20.3862	14	4909
98	144.541	444.758	20.8989	14	4939
99	143.311	444.442	20.5117	14	4972
100	141.667	442.982	21.0947	14	5005
101	141.207	442.01	20.8321	14	5037
102	141.422	441.182	20.7826	14	5068
103	141.787	441.27	20.9767	14	5101
104	141.919	441.497	21.1841	14	5134
105	144.518	444.416	20.9621	14	5169
106	142.818	443.687	21.0768	14	5201
107	141.344	443.17	20.7315	14	5231
108	142.921	444.013	21.3431	14	5261
109	145.154	445.711	20.7942	14	5290
110	145.479	445.733	20.95	14	5320
111	145.94	445.56	20.9768	14	5351
112	145.197	445.159	21.4863	14	5382
113	147.186	444.976	20.829	14	5412
114	149.056	444.436	20.9901	14	5443
115	147.864	444.578	21.2224	14	5472
116	146.743	444.748	21.5332	14	5501
117	146.025	444.588	21.8771	14	5532
118	148.236	444.587	21.387	14	5561
119	144.531	444.056	23.0548	14	5592
120	145.269	444.38	22.8937	14	5620
121	150.988	444.629	21.0588	14	5645
122	150.846	444.785	21.2563	14	5674
123	148.553	444.57	22.3708	14	5704
124	147.616	444.541	22.8001	14	5729
125	148.149	444.718	22.7905	14	5756
126	149.679	444.855	22.3703	14	5784
127	150.059	445.186	22.9969	14	5812
128	150.399	445.699	23.0854	14	5840
129	150.831	445.728	22.8758	14	5869
130	150.79	446.188	22.6944	14	5899
131	150.47	446.36	23.2378	14	5929
132	150.978	446.656	22.977	14	5959
133	151.26	446.486	23.3009	14	5989
134	151.636	446.786	23.0323	14	6020
135	151.822	446.884	23.0292	14	6049
136	152.992	447.134	23.2099	14	6080
137	152.841	447.157	23.0377	14	6111
138	150.055	447.029	24.0355	14	6140
139	148.913	447.111	25.5	14	6186
140	153.294	446.348	23.9429	14	6197
141	152.933	446.371	23.3053	14	6226
142	148.408	446.79	25.5	14	6274
143	148.501	446.901	25.5	14	6301
144	147.934	446.764	25.5	14	6327
145	147.816	446.473	25.5	14	6355
146	146.582	446.376	25.5	14	6381
147	153.824	446.237	23.2855	14	6393
148	154.153	446.262	23.5011	14	6420
149	153.888	446.252	23.5727	14	6446
150	154.117	445.904	23.6652	14	6472
151	154.628	445.787	23.4723	14	6497
152	155.233	446.015	23.3375	14	6522
153	155.485	445.926	23.8059	14	6548
154	155.565	445.693	22.8613	14	6573
155	155.577	445.858	22.8357	14	6598
156	155.24	445.696	25.5	14	6635
157	154.586	445.878	23.8406	14	6647
158	153.568	445.687	25.5	14	6682
159	153.923	445.902	25.5	14	6705
160	154.489	445.913	25.5	14	6729
161	152.841	446.166	25.5	14	6752
162	154.814	446.032	25.5	14	6774
163	154.675	446.258	25.5	14	6795
164	147.7	446.78	25.5	14	6816
165	146.751	446.969	25.5	14	6836
166	154.028	445.75	25.5	14	6856
167	153.141	445.645	25.5	14	6876
168	153.944	446.03	25.5	14	6896
169	153.07	446.678	25.5	14	6916
170	155.544	447.659	25.5	14	6936
171	145.037	444.838	25.5	14	6956
172	153.856	447.618	25.5	14	6976
173	156.17	447.693	25.5	14	6995
174	155.884	448.156	25.5	14	7015
175	156.427	448.333	25.5	14	7033
176	156.367	448.675	25.5	14	7050
1	240.018	466.923	7.7764	15	14
2	239.118	467.494	7.76133	15	61
3	240.36	467.582	8.1341	15	110
4	239.855	466.466	7.23235	15	159
5	240.106	466.435	6.9816	15	208
6	239.563	466.524	7.69734	15	260
7	239.815	466.956	8.47502	15	313
8	240.17	467.981	8.63519	15	363
9	240.029	467.973	9.31431	15	419
10	239.658	468.132	9.57364	15	474
11	241.124	468.434	9.56205	15	528
12	241.563	468.076	9.25811	15	585
13	241.154	467.507	8.98804	15	639
15	234.602	456.619	5.5	15	755
16	234.99	453.822	5.5	15	817
17	235.387	457.256	5.5	15	880
18	235.955	452.811	5.5	15	940
19	235.728	445.197	7.1226	15	1001
20	235.647	446.397	6.75527	15	1060
21	234.515	449.783	5.5	15	1116
22	234.639	448.888	5.5	15	1174
23	233.963	442.697	8.12624	15	1233
24	234.339	443.055	8.88542	15	1294
25	235.8	453.343	5.5	15	1350
26	235.741	450.744	5.5	15	1411
27	235.905	448.545	7.41114	15	1471
28	234.778	449.508	7.23991	15	1529
29	234.216	449.339	7.50848	15	1589
30	234.212	450.261	6.90457	15	1647
31	234.359	450.698	7.26146	15	1705
32	234.743	443.637	10.1058	15	1763
33	235.615	448.586	8.35143	15	1817
34	235.109	447.862	8.55306	15	1873
35	236.623	445.857	10.2269	15	1930
36	234.768	447.877	9.06226	15	1982
37	234.676	453.08	7.51733	15	2036
38	235.204	451.21	8.37136	15	2089
39	235.846	450.24	9.12675	15	2144
40	236.322	448.07	10.5533	15	2202
41	236.019	444.563	11.2089	15	2257
42	237.146	445.713	11.4558	15	2314
43	236.877	447.974	10.9654	15	2366
44	236.542	445.241	12.1733	15	2420
45	235.236	444.578	11.5634	15	2471
46	234.894	441.088	12.3226	15	2525
47	235.78	441.518	12.7273	15	2579
48	237.742	449.12	12.0201	15	2633
49	237.282	456.428	10.2401	15	2684
50	236.804	456.868	10.5242	15	2736
51	236.576	457.228	10.4877	15	2787
52	236.57	454.611	10.7269	15	2842
53	237.564	449.28	12.6017	15	2894
54	238.091	447.607	13.0942	15	2948
55	237.919	447.345	12.9767	15	3002
56	236.219	444.582	13.0539	15	3056
57	237.787	446.377	12.9751	15	3113
58	237.29	447.002	13.1772	15	3168
59	233.497	442.414	13.3601	15	3222
60	231.721	441.078	13.3275	15	3277
61	235.241	443.512	13.2093	15	3329
62	237.68	456.854	11.0123	15	3380
63	237.255	457.131	11.2235	15	3436
64	233.022	449.089	25.5	15	3531
1	123.936	336.928	10.6303	16	15
2	123.668	336.935	10.8668	16	62
3	124.724	336.975	10.9601	16	111
4	123.812	336.539	10.865	16	160
5	124.166	335.742	10.5411	16	210
6	123.349	336.322	11.1021	16	261
7	125.127	335.182	11.2295	16	315
8	127.128	334.666	12.3332	16	368
9	124.347	336.835	12.074	16	421
10	125.525	336.657	12.2439	16	475
11	126.506	337.289	12.0713	16	529
12	125.457	337.144	11.5338	16	583
13	124.927	336.596	11.5853	16	642
14	124.199	337.121	12.1468	16	703
15	124.468	336.945	11.9383	16	763
16	124.17	337.067	12.3344	16	824
17	125.577	337.001	12.2817	16	886
18	126.614	337.097	12.2259	16	947
19	127.477	335.674	12.2036	16	1007
20	127.022	335.457	12.5368	16	1067
21	123.471	336.662	12.8658	16	1124
22	126.549	334.968	13.1773	16	1182
23	131.129	332.213	14.1515	16	1240
24	131.636	331.912	14.557	16	1324
25	131.54	333.755	14.5853	16	1384
26	131.767	334.976	14.4274	16	1443
27	132.182	335.977	15.2748	16	1504
28	129.921	334.965	14.7897	16	1559
29	128.656	334.612	15.201	16	1618
30	127.87	333.915	14.7096	16	1678
31	129.534	334.414	15.4536	16	1733
32	131.618	333.422	15.5003	16	1789
33	131.568	335.223	15.8993	16	1847
34	131.58	335.359	15.8964	16	1903
35	130.829	335.652	15.669	16	1956
36	129.226	333.926	15.6142	16	2011
37	129.7	334.09	16.0465	16	2064
38	129.766	333.89	16.119	16	2119
39	130.675	334.462	16.0763	16	2175
40	131.053	335.083	15.9867	16	2231
41	133.284	334.437	16.7673	16	2288
42	132.82	337.026	17.4524	16	2342
43	131.601	335.838	17.0107	16	2391
44	130.494	337.309	17.2769	16	2447
45	132.481	345.003	18.5498	16	2499
46	119.988	365.251	16.8239	16	2553
47	119.895	365.727	18.1081	16	2607
1	52.6217	293.596	12.8256	17	16
2	52.8303	293.815	12.9224	17	63
3	52.9583	293.816	13.2184	17	113
4	52.8255	293.969	12.5153	17	162
5	52.8342	294.057	12.8789	17	212
6	50.0122	294.079	12.919	17	263
7	47.7142	294.336	13.4482	17	317
8	48.2097	295.205	13.6338	17	367
9	47.1558	295.045	14.134	17	420
10	46.6212	295.456	14.5481	17	497
11	46.4034	295.941	14.683	17	552
12	46.6268	296.263	14.5783	17	606
13	46.6031	296.816	14.7884	17	666
14	46.4133	296.619	14.6155	17	724
15	45.9018	296.846	14.6015	17	784
16	46.4846	295.486	14.3896	17	845
17	46.4281	295.389	14.5252	17	906
18	46.4457	295.959	14.7171	17	968
19	46.4069	296.094	14.9278	17	1031
20	46.9361	294.904	14.9989	17	1092
21	47.0161	295.048	14.8791	17	1147
22	46.6854	295.171	15.2416	17	1206
23	46.7695	295.318	15.3633	17	1264
24	46.8978	294.571	15.4005	17	1323
25	46.9661	294.755	15.6548	17	1383
26	46.7644	295.065	15.6416	17	1442
27	46.9556	295.026	16.0442	17	1502
28	46.3868	295.455	16.3641	17	1558
29	46.1717	294.519	16.4282	17	1617
30	46.3752	294.645	16.4326	17	1677
31	46.8958	294.034	16.7336	17	1732
32	46.5566	294.306	16.7954	17	1790
33	46.8342	293.465	17.1014	17	1848
34	45.6943	293.178	16.1321	17	1902
36	36.47	291.547	14.8525	17	2009
37	23.1002	293.779	10.2899	17	2038
38	18.1672	298.082	9.61835	17	2090
1	319.99	304.328	5.5	18	17
2	321.419	305.444	5.5	18	65
3	322.248	306.976	5.5	18	115
4	322.756	308.316	5.5	18	164
5	322.796	310.131	5.5	18	214
6	322.928	310.693	5.5	18	265
7	316.657	318.376	5.5	18	319
8	315.952	319.178	5.5	18	370
9	316.831	318.982	5.5	18	423
10	316.738	319.472	5.5	18	476
11	316.711	319.788	5.5	18	530
12	316.938	319.424	5.5	18	586
13	316.772	320.104	5.5	18	644
14	316.661	320.017	5.5	18	704
15	316.295	320.237	5.5	18	764
16	316.751	319.769	5.5	18	825
17	316.635	319.394	5.5	18	887
18	316.367	319.674	5.5	18	948
19	316.364	319.559	5.5	18	1008
20	316.573	319.655	5.5	18	1068
21	316.934	319.131	5.5	18	1125
22	317.515	322.282	7.8513	18	1183
23	316.498	319.484	5.5	18	1241
24	316.814	321.887	5.5	18	1299
25	317.062	322.543	5.5	18	1357
26	316.612	320.842	5.5	18	1418
27	316.302	319.699	5.5	18	1477
28	315.907	319.108	5.5	18	1535
29	316.323	319.498	5.5	18	1595
30	316.544	319.28	5.5	18	1654
31	316.76	319.637	5.5	18	1711
32	316.857	318.56	5.5	18	1768
33	317.367	318.126	5.5	18	1825
34	316.534	318.825	5.5	18	1880
35	316.772	318.72	5.5	18	1936
36	316.318	318.94	5.5	18	1989
37	316.571	318.725	5.5	18	2044
38	317.168	318.452	5.5	18	2096
39	316.68	319.563	5.5	18	2150
40	317.113	321.271	5.5	18	2207
41	317.999	324.294	5.5	18	2262
42	317.886	321.871	5.5	18	2319
43	317.684	320.285	6.97721	18	2371
44	318.08	320.232	7.10425	18	2423
45	318.615	320.313	7.16525	18	2475
46	318.16	320.891	6.94066	18	2528
47	317.806	321.105	7.70271	18	2582
48	317.586	321.411	7.53676	18	2635
49	318.701	320.943	8.12951	18	2688
50	318.809	321.478	7.87509	18	2740
51	318.634	321.843	8.39756	18	2791
52	318.656	321.941	8.57682	18	2846
53	318.688	321.645	8.39758	18	2896
54	318.805	321.764	8.96682	18	2950
55	318.671	322.091	8.45992	18	3004
56	318.889	321.971	8.51381	18	3058
57	318.746	322.229	8.79998	18	3115
58	318.517	322.363	8.9875	18	3170
59	318.393	322.246	8.81433	18	3224
60	318.429	321.93	8.76021	18	3279
61	318.396	322.29	8.91338	18	3331
62	318.697	322.26	9.19538	18	3384
63	318.816	321.656	9.22228	18	3439
64	318.704	322.08	9.18311	18	3493
65	318.447	322.729	8.67114	18	3544
66	318.163	322.122	8.9853	18	3593
67	318.164	321.973	9.44638	18	3641
68	318.089	321.735	9.66649	18	3689
69	317.145	320.89	14.1147	18	3739
70	316.368	316.358	14.7728	18	3805
71	318.594	321.317	9.89721	18	3831
72	318.836	321.46	9.85744	18	3879
73	318.796	321.128	10.0304	18	3931
74	318.931	321.017	10.0632	18	3979
75	319.04	320.906	10.3644	18	4028
76	318.679	321.249	10.1463	18	4075
77	319.669	321.035	10.501	18	4122
78	319.212	321.001	10.4884	18	4168
79	319.196	320.582	10.595	18	4213
80	319.349	320.84	10.7339	18	4259
81	319.143	321.992	10.7472	18	4306
82	319.558	323.201	11.0117	18	4351
83	319.879	322.875	11.1531	18	4393
84	320.575	321.049	11.6173	18	4434
85	321.912	319.71	11.9212	18	4474
86	320.391	322.329	12.3605	18	4512
87	319.711	323.136	12.4357	18	4550
88	320.064	323.563	12.7654	18	4588
89	320.239	323.828	12.926	18	4624
90	320.352	323.712	12.972	18	4660
91	320.654	323.416	13.1894	18	4694
92	320.701	323.621	13.2433	18	4729
93	320.679	323.779	13.2526	18	4763
94	320.783	324.414	13.3048	18	4797
95	321.041	324.331	13.3661	18	4830
96	320.988	323.873	13.3889	18	4864
97	320.823	323.816	13.3573	18	4896
98	320.983	324.041	13.5709	18	4926
99	320.733	324.244	13.5162	18	4959
100	321.29	323.251	13.4289	18	4992
101	320.966	323.067	13.3256	18	5024
102	320.701	323.695	13.3797	18	5056
103	320.645	323.685	13.5736	18	5089
104	320.549	323.71	13.4451	18	5123
105	320.654	323.619	13.4725	18	5156
106	320.339	323.692	13.5643	18	5189
107	320.901	323.473	13.7198	18	5220
108	320.572	323.518	13.8774	18	5251
109	320.983	323.169	13.9926	18	5281
110	321.003	322.746	14.1787	18	5312
111	320.44	323.603	14.3339	18	5352
112	320.823	322.989	14.3614	18	5384
113	317.897	321.342	20.1416	18	5416
114	316.357	318.169	19.4461	18	5447
115	320.165	323.864	14.6191	18	5473
116	320.663	322.823	14.8077	18	5502
117	320.525	323.504	14.9042	18	5533
118	320.211	323.453	15.0784	18	5563
119	320.084	323.797	15.1319	18	5593
120	320.502	323.353	15.2063	18	5621
121	320.757	323.284	15.2452	18	5648
122	320.675	323.396	15.4507	18	5676
123	320.604	324.173	15.5112	18	5705
124	320.531	324.234	15.6592	18	5730
125	320.382	324.467	15.7897	18	5757
126	321.309	325.031	15.7847	18	5785
127	321.559	325.354	16.1781	18	5813
128	321.525	324.921	16.1618	18	5841
129	321.923	324.462	16.2172	18	5870
130	322.247	324.315	16.4018	18	5900
131	321.441	325.491	16.4464	18	5930
132	321.744	326.09	16.374	18	5960
133	322.304	325.209	16.8632	18	5990
134	322.68	324.545	16.9681	18	6021
135	322.401	325.726	16.8801	18	6050
136	322.392	327.075	16.7525	18	6081
137	322.328	327.388	17.121	18	6112
138	322.28	326.502	17.0944	18	6141
139	322.395	326.757	16.9915	18	6168
140	322.268	326.477	17.1104	18	6198
141	322.108	325.626	17.1696	18	6227
142	322.179	326.274	17.0622	18	6255
143	322.145	326.866	16.9784	18	6284
144	322.176	327.051	17.255	18	6312
145	322.219	326.131	17.2426	18	6339
146	322.27	325.147	17.4268	18	6365
147	322.269	325.672	17.3662	18	6394
148	321.844	325.581	17.4788	18	6421
149	321.826	325.599	17.2978	18	6447
150	321.91	325.3	17.5773	18	6473
151	322.12	325.19	17.7164	18	6498
152	321.993	325.45	17.7901	18	6523
153	321.991	325.651	17.7798	18	6549
154	321.841	325.715	17.4811	18	6575
155	321.946	325.829	17.5999	18	6600
156	322.103	325.879	17.6948	18	6622
157	321.852	325.521	17.5286	18	6648
158	322.003	325.635	17.9991	18	6671
159	321.855	325.871	18.2649	18	6694
160	321.948	325.293	18.1697	18	6717
161	321.919	325.437	18.2848	18	6741
162	322.011	325.645	18.3493	18	6762
163	322.033	325.656	18.1664	18	6783
164	321.927	324.901	18.5202	18	6804
165	321.867	324.607	18.5172	18	6824
166	322.039	325.223	18.6375	18	6844
167	322.7	324.274	18.9834	18	6864
168	323.233	323.906	19.2265	18	6884
169	322.728	325.762	19.4185	18	6905
170	323.133	325.893	19.4791	18	6923
171	323.493	325.292	19.7921	18	6943
172	323.28	325.759	19.9943	18	6965
173	323.286	326.16	19.8714	18	6982
174	323.317	326.74	19.9616	18	7001
175	323.769	326.36	19.9274	18	7020
176	323.838	326.374	20.1472	18	7038
1	334.976	401.732	5.5	19	18
2	335.243	402.261	5.5	19	66
3	335.716	401.714	5.5	19	116
4	335.767	401.664	5.5	19	165
5	336.183	401.852	5.5	19	215
6	336.346	402.157	5.5	19	266
7	336.421	402.354	5.5	19	320
8	336.979	402.319	5.5	19	371
9	336.84	402.52	5.5	19	424
10	337.181	402.716	5.5	19	478
11	337.118	402.834	5.5	19	532
12	336.965	402.783	5.5	19	588
13	336.669	403.61	5.5	19	646
14	336.51	403.749	5.5	19	706
15	337.169	402.966	5.5	19	766
16	337.171	402.982	5.5	19	827
17	336.818	402.913	5.5	19	889
18	336.705	403.116	5.5	19	950
19	336.926	402.937	5.5	19	1010
20	336.465	402.902	5.5	19	1069
21	336.883	402.987	5.5	19	1126
22	337.073	402.9	5.5	19	1184
23	337.014	402.728	5.5	19	1242
24	336.961	402.293	5.5	19	1301
25	336.563	402.4	5.5	19	1360
26	336.757	402.112	5.5	19	1421
27	336.945	402.242	5.5	19	1479
28	337.312	402.252	5.5	19	1537
29	337.002	402.314	5.5	19	1597
30	337.293	402.138	5.5	19	1656
31	337.11	401.482	5.5	19	1713
32	337.303	401.928	5.5	19	1769
33	336.838	402.062	5.5	19	1826
34	336.837	402.163	5.5	19	1881
35	336.836	401.84	5.5	19	1937
36	337.119	401.71	5.5	19	1990
37	336.901	401.141	5.5	19	2045
38	337.211	401.172	5.5	19	2097
39	337.679	400.155	5.5	19	2151
40	336.272	392.589	10.8654	19	2213
41	337.5	388.558	14.939	19	2291
42	339.213	387.909	13.6067	19	2329
43	337.449	388.695	14.9089	19	2395
44	340.781	387.635	11.7866	19	2432
1	363.839	411.611	5.5	20	19
2	363.121	412.325	5.5	20	67
3	363.611	412.07	5.5	20	117
4	364.506	411.416	5.5	20	166
5	365.223	411.156	5.5	20	216
6	365.35	411.608	5.5	20	267
7	365.691	411.582	5.5	20	321
8	365.597	411.939	5.5	20	372
9	366.098	411.982	5.5	20	425
10	365.488	412.587	5.5	20	479
11	365.952	412.114	5.5	20	533
12	366.693	411.876	5.5	20	589
13	366.257	412.33	5.5	20	647
14	365.986	412.209	5.5	20	707
15	365.669	412.762	5.5	20	767
16	365.802	412.591	5.5	20	828
17	365.379	412.767	5.5	20	890
18	365.21	412.762	5.5	20	951
19	365.846	412.196	6.8235	20	1016
20	365.341	412.27	7.61926	20	1075
21	364.867	412.625	7.36005	20	1132
22	365.549	411.953	7.68623	20	1190
23	364.793	411.709	8.75978	20	1248
24	364.84	411.647	8.88204	20	1307
25	362.196	411.941	9.92499	20	1368
26	362.246	412.218	9.91383	20	1428
27	365.359	411.841	8.91135	20	1484
28	365.935	412.305	8.75952	20	1542
29	365.731	412.171	8.90777	20	1602
30	365.345	412.414	8.81422	20	1661
31	366.083	412.042	8.90759	20	1718
32	365.505	412.496	9.19672	20	1775
33	365.673	412.269	9.47377	20	1832
34	365.754	412.391	9.52259	20	1888
35	365.734	412.231	9.58567	20	1944
36	369.115	410.547	9.53114	20	1996
37	370.883	408.829	10.0969	20	2052
38	371.325	409.113	10.2368	20	2104
39	371.119	409.47	10.5135	20	2158
40	371.755	409.29	10.7425	20	2214
41	371.467	410.479	10.6931	20	2270
42	371.586	410.967	10.6812	20	2326
43	368.966	412.255	10.8965	20	2377
44	367.35	413.458	11.1091	20	2430
45	369.113	412.799	11.1325	20	2482
46	370.222	412.221	11.392	20	2535
47	368.903	413.397	11.7111	20	2588
48	368.963	413.673	11.8798	20	2640
49	369.233	413.558	11.8489	20	2693
50	369.91	413.618	11.878	20	2745
51	369.272	413.776	12.153	20	2796
52	369.3	413.804	12.6648	20	2851
53	369.045	414.118	12.8247	20	2902
54	369.283	414.069	12.8155	20	2955
55	369.543	414.127	12.6121	20	3009
56	370.14	413.791	12.8444	20	3063
57	369.288	415.051	14.0872	20	3120
58	369.7	413.768	13.0585	20	3175
59	370.712	413.138	12.8614	20	3229
60	370.687	413.255	12.9273	20	3284
61	370.743	413.185	13.017	20	3336
62	369.946	413.402	13.036	20	3388
63	369.181	413.756	13.0917	20	3443
64	369.808	413.219	12.9499	20	3498
65	369.425	413.629	13.0533	20	3550
66	371.892	412.77	13.1635	20	3598
67	368.938	414.065	13.3089	20	3646
68	369.722	413.57	13.3765	20	3694
69	371.776	412.556	13.4058	20	3740
70	369.643	413.703	13.5009	20	3787
71	368.662	414.062	13.7674	20	3835
72	373.37	410.767	14.1612	20	3882
73	373.965	409.175	14.7724	20	3956
74	374.303	408.157	15.0753	20	4003
75	365.026	406.881	16.9855	20	4052
76	365.332	406.682	16.7873	20	4100
77	365.044	407.244	17.1515	20	4147
78	365.328	406.975	17.0003	20	4193
79	363.452	409.223	17.041	20	4235
80	365.645	407.611	17.3747	20	4282
81	365.723	407.353	17.2636	20	4328
82	364.974	408.434	17.4783	20	4371
83	365.349	408.253	17.638	20	4411
84	365.638	408.425	18.3279	20	4455
85	364.525	411.167	17.9057	20	4493
86	364.911	410.712	18.3756	20	4529
87	364.234	411.812	18.4264	20	4568
88	364.051	412.261	18.8014	20	4607
89	364.028	412.667	19.4647	20	4643
90	363.786	413.558	19.787	20	4678
91	363.906	413.33	19.7662	20	4712
92	364.397	413.134	19.7202	20	4747
93	364.276	413.703	20.0388	20	4780
94	365.314	412.68	19.179	20	4809
95	367.536	410.293	19.9214	20	4849
96	366.36	411.052	20.1365	20	4883
97	365.209	412.192	20.0419	20	4916
98	366.499	410.453	20.5093	20	4944
99	371.874	417.163	25.5	20	4991
100	368.07	414.173	25.5	20	5023
101	370.994	416.646	25.5	20	5055
102	370.843	416.385	25.5	20	5088
103	366.236	412.153	22.4489	20	5108
104	365.986	412.163	21.9781	20	5141
106	353.563	435.81	20.6438	20	5208
1	495.794	428.33	5.5	21	20
2	496.624	427.968	5.5	21	68
3	496.402	428.416	5.5	21	119
4	495.826	428.526	5.5	21	168
5	495.595	428.486	5.5	21	218
6	491.436	425.688	5.5	21	269
7	493.574	426.378	5.5	21	323
8	494.613	427.009	5.5	21	373
9	495.165	427.037	5.5	21	426
10	493.435	426.665	5.5	21	480
11	489.248	426.556	5.5	21	534
12	490.947	426.429	5.5	21	590
13	493.638	426.738	5.5	21	648
14	495.145	427.487	5.5	21	708
15	488.741	426.757	5.5	21	768
16	494.079	426.943	5.5	21	829
17	494.926	427.45	5.5	21	891
18	494.667	427.317	5.5	21	952
19	492.045	426.15	5.5	21	1011
20	489.409	426.144	5.5	21	1070
21	494.267	426.885	5.5	21	1128
22	495.063	427.082	5.5	21	1186
23	494.927	427	5.5	21	1244
24	493.682	426.143	5.5	21	1303
25	491.824	425.549	5.5	21	1362
26	488.74	425.693	5.5	21	1422
27	487.413	426.039	5.5	21	1480
28	489.925	425.412	5.5	21	1538
29	490.488	425.554	5.5	21	1598
30	483.134	426.532	5.5	21	1657
31	480.353	427.239	5.5	21	1714
32	476.387	426.738	5.5	21	1770
33	457.265	443.255	5.5	21	1828
34	465.729	457.849	5.5	21	1884
35	474.141	457.516	7.43553	21	1942
36	476.047	450.716	9.62532	21	1998
37	476.995	451.212	8.65967	21	2051
38	476.788	448.92	8.87573	21	2103
39	476.294	448.417	9.05838	21	2157
40	476.719	451.254	9.8605	21	2215
41	478.059	454.351	8.8898	21	2268
42	476.769	472.21	7.39796	21	2323
43	475.569	475.415	7.64768	21	2374
44	474.533	481.748	7.86324	21	2425
45	474.152	480.882	8.19445	21	2479
46	473.375	481.392	8.13296	21	2531
47	469.514	482.927	9.22246	21	2584
48	460.768	486.9	9.3866	21	2639
49	456.838	501.875	9.95112	21	2692
50	454.28	507.934	9.66592	21	2744
51	454.346	507.934	9.65451	21	2794
52	454.596	507.934	9.96682	21	2849
53	452.835	507.934	9.67409	21	2900
1	481.65	432.017	5.5	22	21
2	481.704	433.136	5.5	22	69
3	481.441	431.087	5.5	22	120
4	482.022	431.453	5.5	22	169
5	482.024	431.621	5.5	22	219
6	482.966	432.748	5.5	22	270
7	483.078	432.819	5.5	22	324
8	482.059	431.86	5.5	22	374
9	483.105	432.875	5.5	22	428
10	483.666	432.993	5.5	22	482
11	484.434	432.641	5.5	22	536
12	484.243	433.413	5.5	22	591
13	482.125	431.847	5.5	22	649
14	483.994	433.894	7.14477	22	713
15	485.189	434.894	5.5	22	769
16	484.615	434.724	5.5	22	830
17	484.082	433.986	6.94455	22	896
18	484.031	433.824	7.25509	22	958
19	484.185	434.201	7.48242	22	1017
20	484.819	434.397	7.3282	22	1076
21	484.224	434.161	7.64376	22	1133
22	484.178	433.676	7.64353	22	1191
23	484.434	434.45	8.30517	22	1249
24	484.693	434.48	8.85796	22	1308
25	484.659	434.284	9.09797	22	1366
26	484.7	433.551	8.42482	22	1426
27	484.99	433.753	8.69046	22	1485
28	485.156	434.847	9.61657	22	1543
29	486.034	435.534	10.013	22	1603
30	486.606	436.492	10.1276	22	1662
31	487.397	437.29	10.7303	22	1719
32	489.725	437.585	11.6651	22	1776
33	489.699	437.409	12.0574	22	1835
34	489.181	437.397	11.9603	22	1890
35	487.685	436.366	11.1279	22	1945
36	486.573	435.544	10.9777	22	1997
37	486.979	436.142	11.1764	22	2053
38	486.786	436.246	11.5027	22	2105
39	486.787	436.237	11.4884	22	2159
40	486.083	435.12	11.8698	22	2217
41	485.302	434.145	11.69	22	2271
42	485.243	433.992	11.6517	22	2327
43	491.399	439.263	13.2801	22	2379
44	491.17	440.032	13.3123	22	2433
45	490.821	439.764	13.2792	22	2485
46	487.137	436.889	12.747	22	2537
47	486.892	436.461	13.0414	22	2590
48	485.786	435.141	12.7139	22	2641
49	486.043	435.48	12.8936	22	2694
50	486.658	436.208	13.0188	22	2746
51	486.68	436.139	13.2374	22	2797
52	486.047	435.803	13.3904	22	2852
53	484.159	433.452	13.1832	22	2903
54	487.887	438.394	14.4401	22	2975
55	486.35	436.462	13.7348	22	3010
56	486.978	437.239	13.8405	22	3064
57	486.823	437.203	13.3635	22	3121
58	486.88	437.342	13.6403	22	3176
59	487.409	437.914	13.7165	22	3230
60	491.826	442.301	15.1572	22	3304
61	490.716	440.804	15.1802	22	3355
62	489.498	439.545	15.3179	22	3410
63	488.253	438.535	14.5087	22	3465
64	486.209	436.407	13.7115	22	3499
65	482.392	432.301	12.8282	22	3551
66	484.002	433.943	13.0846	22	3599
67	483.896	433.171	13.3	22	3647
68	482.716	432.411	12.8519	22	3695
69	483.078	431.995	12.1646	22	3741
70	483.049	432.29	12.636	22	3788
71	482.499	431.678	13.2184	22	3836
72	484.653	434.732	13.9413	22	3883
73	486.293	436.162	14.4864	22	3958
74	486.731	437.222	14.7448	22	4005
75	486.878	437.975	14.7549	22	4049
76	487.67	439.058	15.5368	22	4098
77	486.789	436.563	16.0386	22	4144
78	485.977	435.231	15.0408	22	4189
79	484.773	434.182	14.689	22	4231
80	483.774	433.455	14.8526	22	4278
81	482.971	432.375	15.0986	22	4324
82	482.127	430.703	15.4177	22	4367
83	482.649	431.703	15.2552	22	4408
84	482.556	431.878	15.3268	22	4452
85	481.859	431.455	14.848	22	4490
86	482.004	431.657	15.4922	22	4527
1	255.052	438.157	5.5	23	22
2	255.02	437.976	5.5	23	70
3	255.527	438.294	5.5	23	121
4	256.052	438.26	5.5	23	170
5	254.451	437.686	5.5	23	220
6	255.539	438.376	5.5	23	271
7	256.476	438.853	5.5	23	325
8	256.358	439.087	5.5	23	375
9	256.116	439.188	5.5	23	429
10	256.388	439.485	5.5	23	483
11	256.705	439.287	5.5	23	537
12	257.053	439.38	5.5	23	592
13	257.126	439.752	5.5	23	650
14	256.619	439.744	5.5	23	709
15	256.222	439.622	5.5	23	770
16	256.096	439.583	5.5	23	831
17	256.496	439.289	5.5	23	892
18	256.901	439.109	5.5	23	953
19	256.057	438.435	5.5	23	1013
20	255.974	438.329	5.5	23	1072
21	256.412	439.116	5.5	23	1129
22	256.249	438.973	5.5	23	1187
23	256.369	438.836	5.5	23	1245
24	256.771	438.713	5.5	23	1304
25	256.938	438.31	5.5	23	1363
26	257.065	438.548	5.5	23	1423
27	256.331	438.439	5.5	23	1481
28	255.579	437.898	5.5	23	1539
29	255.096	438.105	5.5	23	1599
30	256.105	438.173	5.5	23	1658
31	256.821	438.633	5.5	23	1715
32	257.03	438.478	5.5	23	1771
33	256.305	438.253	5.5	23	1827
34	256.282	438.081	5.5	23	1882
35	256.304	438.575	5.5	23	1938
36	256.347	439.071	5.5	23	1991
37	256.588	438.902	5.5	23	2046
38	256.862	439.108	5.5	23	2098
39	257.291	438.88	5.5	23	2152
40	257.419	439.059	5.5	23	2208
41	257.219	439.341	5.5	23	2263
42	257	440.035	5.5	23	2320
43	257.5	440.404	5.5	23	2369
44	257.887	440.672	7.36396	23	2424
45	258.871	439.94	8.14028	23	2478
46	258.898	438.307	7.90204	23	2530
47	256.374	437.077	7.92305	23	2583
48	261.86	445.279	11.8728	23	2642
49	262.616	445.134	11.793	23	2695
50	264.388	444.498	12.3328	23	2747
51	270.084	438.485	13.9571	23	2798
52	269.522	438.356	13.707	23	2853
53	270.548	437.71	14.3328	23	2923
54	269.851	440.24	14.1481	23	2956
55	270.07	439.378	13.8508	23	3011
56	269.907	439.963	13.8547	23	3065
57	269.404	440.976	13.7749	23	3122
58	270.894	439.296	14.6937	23	3194
59	271.129	437.385	14.874	23	3249
60	269.776	438.601	14.216	23	3285
61	270.093	438.171	14.5397	23	3354
62	270.69	437.939	14.7824	23	3409
63	272.027	437.624	15.1918	23	3464
64	272.849	437.078	15.0059	23	3516
65	272.628	435.862	14.9348	23	3567
66	270.519	437.703	15.1303	23	3617
67	269.643	438.294	14.7202	23	3664
68	269.675	438.647	14.848	23	3712
69	271.762	435.826	15.1565	23	3763
70	273.535	433.518	15.3959	23	3808
71	272.97	435.335	15.3913	23	3858
72	271.734	436.654	15.627	23	3907
73	273.018	433.152	15.7026	23	3957
74	272.079	433.842	15.7357	23	4004
1	257.483	453.626	5.5	24	23
2	256.712	453.432	5.5	24	71
3	257.279	453.451	5.5	24	122
4	258.265	453.278	5.5	24	171
5	258.771	453.787	5.5	24	221
6	258.491	454.732	5.5	24	272
7	257.91	455.075	5.5	24	326
8	258.393	456.165	5.5	24	376
9	258.479	455.285	5.5	24	430
10	258.961	455.748	5.5	24	484
11	259.72	455.902	5.5	24	538
12	260.14	455.536	5.5	24	594
13	259.757	456.259	5.5	24	652
14	259.425	457.582	5.5	24	711
15	259.047	456.858	5.5	24	772
16	259.727	457.528	5.5	24	833
17	259.851	457.033	5.5	24	894
18	259.818	455.677	5.5	24	955
19	259.382	455.834	5.5	24	1014
20	258.912	456.214	5.5	24	1073
21	258.487	456.427	5.5	24	1130
22	258.272	456.4	5.5	24	1188
23	258.737	455.662	5.5	24	1246
24	259.492	455.574	5.5	24	1305
25	259.931	455.489	5.5	24	1364
26	259.032	454.53	5.5	24	1424
27	258.621	455.409	5.5	24	1482
28	258.555	456.336	5.5	24	1540
29	258.634	456.129	5.5	24	1600
30	258.949	455.604	5.5	24	1659
31	259.918	455.947	5.5	24	1716
32	260.697	456.328	5.5	24	1772
33	259.906	455.846	5.5	24	1829
34	259.507	456.621	5.5	24	1883
35	259.225	456.576	5.5	24	1939
36	259.134	456.179	5.5	24	1992
37	259.871	456.332	5.5	24	2047
38	260.535	456.54	5.5	24	2099
39	260.824	455.968	5.5	24	2153
40	261.352	458.317	5.5	24	2209
41	262.388	461.085	5.5	24	2264
42	270.024	469.902	10.581	24	2328
43	271.791	473.132	11.0578	24	2378
44	271.676	473.629	11.212	24	2431
45	272.437	473.857	11.6807	24	2483
46	272.974	474.19	11.5359	24	2536
47	273.558	474.858	12.042	24	2591
48	274.13	475.163	12.1168	24	2643
49	274.114	475.912	12.267	24	2696
50	273.448	476.291	12.3364	24	2748
51	272.208	475.983	12.6251	24	2799
52	272.817	476.283	12.9504	24	2854
53	273.255	476.271	12.8443	24	2904
54	274.875	477.217	12.6517	24	2957
55	273.826	477.288	12.9001	24	3012
56	274.16	477.441	12.9062	24	3066
57	273.769	477.046	12.7345	24	3123
58	273.414	477.111	12.8827	24	3177
59	273.01	476.798	13.158	24	3231
60	273.316	474.895	12.8935	24	3286
61	273.717	474.417	12.7112	24	3337
62	273.748	474.184	12.5865	24	3389
63	272.504	473.429	12.6718	24	3444
64	271.727	473.34	12.3267	24	3500
65	272.364	475.15	13.0333	24	3552
66	272.103	474.144	13.222	24	3600
67	273.455	475.525	13.2811	24	3648
68	273.948	475.811	13.3116	24	3696
69	274.65	475.854	13.3581	24	3742
70	273.594	474.879	13.2098	24	3789
71	271.794	474.177	13.2857	24	3837
72	272.944	475.51	13.6121	24	3884
73	273.761	476.329	14.1258	24	3934
74	274.319	475.629	13.8742	24	3983
75	274.157	475.249	14.6062	24	4050
76	274.584	475.989	13.7397	24	4079
77	274.426	476.158	14.6486	24	4145
78	272.886	476.008	14.4597	24	4191
79	272.993	475.711	14.8831	24	4233
80	273.025	475.968	14.8242	24	4280
81	273.691	476.344	15.0233	24	4326
82	274.521	476.827	15.2514	24	4369
83	274.83	476.617	15.1654	24	4409
84	274.987	477.345	15.4712	24	4453
85	273.908	478.871	16.1171	24	4491
86	273.903	479.301	16.4385	24	4528
87	274.307	479.097	16.7598	24	4571
88	275.599	479.495	16.7426	24	4606
89	274.458	480.102	17.5053	24	4641
90	274.984	481.107	17.5112	24	4676
91	276.211	480.376	17.3097	24	4710
92	276.749	480.491	16.9205	24	4745
93	276.285	480.898	17.4931	24	4778
94	274.625	481.996	17.9381	24	4812
95	274.346	481.532	18.0977	24	4847
96	276.245	480.862	17.6766	24	4881
97	278.901	481.396	16.363	24	4911
98	280.985	483.368	15.4937	24	4941
99	281.634	484.121	15.3816	24	4974
100	281.233	484.457	15.3731	24	5007
101	282.177	484.616	15.2355	24	5039
102	282.048	484.177	15.2295	24	5070
103	282.323	485.322	15.3914	24	5103
104	282.661	485.995	15.3306	24	5136
105	281.847	485.557	15.3456	24	5171
106	281.74	484.915	15.5391	24	5204
107	281.616	484.908	15.5831	24	5233
108	282.044	485.713	15.7417	24	5263
109	282.722	484.783	15.6739	24	5292
110	282.895	484.39	15.8163	24	5322
111	282.511	485.026	16.089	24	5354
112	282.206	484.402	16.0742	24	5386
113	280.145	483.148	16.2014	24	5414
114	282.168	485.188	16.2757	24	5445
115	282.67	485.685	16.3499	24	5474
116	282.218	483.649	16.3361	24	5503
117	282.529	484.393	16.5697	24	5534
118	282.779	484.667	16.6687	24	5564
119	282.451	484.707	16.9279	24	5594
120	282.072	484.885	17.2043	24	5622
121	281.837	484.068	17.3156	24	5649
122	282.05	484.831	17.3315	24	5677
123	282.814	485.301	17.2299	24	5706
124	283.89	485.211	17.4522	24	5731
125	283.498	485.716	17.8042	24	5758
126	283.417	485.512	17.7643	24	5786
127	284.007	487.065	17.8357	24	5814
128	285.127	488.193	17.4391	24	5842
129	283.867	487.123	17.8682	24	5871
130	283.706	485.689	18.11	24	5901
131	283.884	487.067	18.2261	24	5931
132	284.197	486.734	18.3193	24	5961
133	283.527	486.339	18.1954	24	5991
134	283.59	487.159	18.3907	24	6022
135	283.149	486.59	18.457	24	6051
136	283.696	487.484	18.5139	24	6082
137	285.209	487.572	18.662	24	6113
138	284.865	487.516	18.6163	24	6142
139	284.29	487.662	18.5672	24	6169
140	283.942	487.69	18.7962	24	6199
141	284.295	486.909	18.5519	24	6228
142	283.724	487.825	18.675	24	6256
143	284.28	488.312	18.6695	24	6285
144	284.871	487.872	18.5632	24	6313
145	284.743	487.874	18.9671	24	6340
146	284.711	488.597	18.9041	24	6366
147	285.254	489.277	18.7999	24	6395
148	284.211	489.301	19.2781	24	6423
149	283.981	488.855	19.1722	24	6448
150	286.238	489.287	18.8472	24	6474
151	288.231	490.394	18.3073	24	6499
152	289.108	490.725	18.1746	24	6524
153	288.955	490.542	18.0992	24	6551
154	288.556	490.678	17.8268	24	6576
155	289.134	490.75	17.6971	24	6601
156	289.15	490.302	18.1059	24	6624
157	290.029	490.184	18.266	24	6650
158	289.845	490.028	18.4827	24	6673
159	289.355	490.386	18.541	24	6696
160	289.47	489.965	18.6101	24	6719
161	288.787	490.55	18.5716	24	6743
162	289.191	490.337	18.8933	24	6764
163	289.708	489.82	19.0448	24	6784
164	290.201	489.705	19.3836	24	6806
165	289.88	489.994	19.0741	24	6826
166	292.444	488.971	19.7275	24	6846
167	294.229	488.102	20.5403	24	6866
168	294.458	488.165	20.7584	24	6886
169	293.658	489.264	21.0294	24	6906
170	293.428	489.69	21.1366	24	6924
171	293.234	490.346	21.1197	24	6944
172	290.388	492.4	20.2555	24	6966
173	290.357	492.886	20.4282	24	6983
174	290.174	492.935	20.4742	24	7002
175	289.994	493.047	20.5091	24	7021
176	290.631	492.891	20.548	24	7039
1	287.424	481.795	5.5	25	24
2	286.876	482.23	5.5	25	72
3	286.261	482.67	5.5	25	123
4	284.374	483.852	5.5	25	172
5	284.429	483.778	5.5	25	222
6	285.201	483.331	5.5	25	273
7	284.699	483.934	5.5	25	327
8	285.025	483.917	5.5	25	377
9	285.993	483.73	5.5	25	431
10	285.647	484.024	5.5	25	485
11	284.924	484.59	5.5	25	539
12	284.394	484.725	5.5	25	595
13	284.075	484.83	5.5	25	653
14	284.112	484.775	5.5	25	712
15	285.311	484.356	5.5	25	773
16	286.61	483.568	5.5	25	834
17	286.159	483.7	5.5	25	895
18	286.134	483.811	5.5	25	956
19	285.928	483.714	5.5	25	1015
20	285.595	483.836	5.5	25	1074
21	283.806	484.324	5.5	25	1131
22	284.632	484.004	5.5	25	1189
23	284.816	483.908	5.5	25	1247
24	285.477	483.76	5.5	25	1306
25	285.964	483.334	5.5	25	1365
26	285.081	483.636	5.5	25	1425
27	283.788	483.922	5.5	25	1483
28	284.042	484.034	5.5	25	1541
29	283.888	483.882	5.5	25	1601
30	283.98	483.969	5.5	25	1660
31	284.912	483.858	5.5	25	1717
32	284.551	483.726	5.5	25	1773
33	284.258	483.9	5.5	25	1830
34	284.603	483.778	5.5	25	1885
35	284.695	483.822	5.5	25	1940
36	285.052	483.422	5.5	25	1993
37	285.353	483.493	5.5	25	2048
38	285.412	483.907	5.5	25	2100
39	285.679	483.766	5.5	25	2154
40	286.057	483.752	5.5	25	2210
41	286.142	484.017	7.31209	25	2269
42	287.884	483.209	7.71807	25	2324
43	288.372	483.347	8.18734	25	2375
44	288.988	483.284	8.56138	25	2426
45	288.544	484.113	8.28306	25	2480
46	289.404	484.03	8.83302	25	2532
47	290.831	484.784	10.7127	25	2589
48	302.754	492.78	13.883	25	2644
49	302.318	494.717	12.3115	25	2697
50	301.676	496.02	12.1175	25	2749
51	301.19	496.541	12.1352	25	2800
52	300.584	498.047	11.9135	25	2855
53	297.342	501.038	10.6469	25	2899
54	296.393	501.774	10.4555	25	2953
55	297.194	501.27	10.4963	25	3007
56	297.041	501.2	10.4333	25	3061
57	296.607	501.803	10.406	25	3118
58	296.173	502.177	10.4799	25	3173
59	295.177	503.271	10.1547	25	3227
60	292.128	507.934	10.1186	25	3282
61	290.342	507.934	10.4433	25	3334
62	289.414	507.934	10.7924	25	3387
63	289.279	507.934	11.0464	25	3442
64	289.493	507.934	10.5164	25	3496
65	291.421	507.934	10.0164	25	3548
66	291.505	507.934	11.0317	25	3596
67	288.652	507.934	11.3855	25	3644
68	288.511	507.934	11.4862	25	3692
69	288.574	507.934	11.977	25	3743
70	288.258	507.934	11.8127	25	3790
71	288.471	507.934	11.6914	25	3834
72	288.45	507.934	11.7539	25	3885
73	288.695	507.934	12.148	25	3935
74	289.024	507.934	12.2789	25	3984
75	288.971	507.934	12.5851	25	4032
76	288.753	507.934	12.2809	25	4080
77	288.905	507.934	12.1866	25	4126
78	289.122	507.934	12.21	25	4172
79	289.23	507.934	12.5872	25	4216
80	289.171	507.934	12.5113	25	4263
81	292.613	507.934	12.0492	25	4308
1	481.012	420.709	10.474	26	25
2	483.365	416.264	7.33532	26	73
3	481.01	418.37	5.5	26	118
4	480.932	419.606	5.5	26	167
5	481.331	418.865	5.5	26	217
6	480.596	420.324	5.5	26	268
7	481.316	420.578	5.5	26	322
9	472.014	431.086	5.5	26	427
10	472.411	428.944	5.5	26	481
11	471.771	432.057	5.5	26	535
12	476.31	442.637	5.5	26	593
13	476.76	445.632	5.5	26	651
14	477.191	450.911	5.5	26	710
15	476.826	448.95	5.5	26	771
16	477.43	451.829	5.5	26	832
17	477.362	450.865	5.5	26	893
18	476.536	447.087	5.5	26	954
19	474.169	436.13	5.5	26	1012
20	473.716	428.053	5.5	26	1071
21	471.533	423.903	5.5	26	1127
22	470.628	419.335	5.5	26	1185
23	473.201	411.018	5.5	26	1243
24	476.696	404.435	5.5	26	1302
25	477.086	402.909	5.5	26	1361
1	497.962	331.723	13.9125	27	26
2	497.949	331.832	13.8865	27	74
3	498.153	332.152	14.1616	27	124
4	498.869	332.743	14.4772	27	186
5	498.13	332.424	14.8596	27	235
6	498.814	333.052	14.9743	27	285
7	498.809	333.069	15.0848	27	338
8	498.477	332.67	15.2854	27	391
9	498.395	332.772	15.4208	27	446
10	498.539	333.076	15.5758	27	500
11	498.831	333.221	15.4283	27	556
12	499.066	333.347	15.5364	27	611
13	499.963	334.127	15.4435	27	670
14	499.535	333.964	15.2735	27	730
15	499.165	333.745	14.7787	27	788
16	498.601	333.289	15.3029	27	849
17	498.344	333.093	15.5675	27	910
18	498.028	332.501	16.3189	27	972
19	498.754	332.763	15.6852	27	1035
20	498.832	332.935	15.8029	27	1095
21	498.764	332.783	15.7959	27	1152
22	498.714	332.789	15.9875	27	1210
23	498.55	332.982	16.2999	27	1268
24	498.267	332.167	16.7344	27	1327
25	498.648	332.428	16.506	27	1389
26	499.038	332.511	16.921	27	1447
27	499.254	332.629	17.3834	27	1507
28	499.116	333.112	17.035	27	1565
29	498.666	332.894	17.0103	27	1623
30	498.852	332.959	17.3011	27	1682
31	498.852	332.768	16.9876	27	1737
32	498.961	332.925	17.3085	27	1794
33	499.409	332.686	17.2353	27	1849
34	499.43	332.548	17.8436	27	1905
35	499.487	333.186	17.7022	27	1958
36	499.274	332.811	17.74	27	2013
37	498.896	332.715	17.7581	27	2067
38	498.268	331.626	17.2871	27	2121
39	498.943	332.659	18.3285	27	2177
40	499.894	333.541	19.0704	27	2234
41	500.061	333.815	18.9479	27	2293
42	499.939	333.902	19.2003	27	2346
43	499.534	333.863	19.7868	27	2398
44	500.156	334.41	19.0635	27	2453
45	500.268	334.566	19.0411	27	2504
46	499.63	334.405	19.7512	27	2559
47	500.045	334.537	19.8201	27	2614
48	500.485	335.106	20.4897	27	2669
49	500.716	335.204	20.4774	27	2724
50	500.503	335.437	20.6176	27	2773
51	500.826	335.595	21.0449	27	2823
52	500.788	335.792	20.7533	27	2877
53	500.97	335.754	22.1022	27	2927
54	501.037	336.289	21.1873	27	2979
55	501.141	336.368	21.5053	27	3033
56	500.945	335.968	21.7997	27	3088
57	501.773	336.602	21.1873	27	3142
58	500.956	336.24	21.7945	27	3197
59	500.736	336.08	21.4102	27	3252
60	500.96	335.908	21.1895	27	3307
61	500.938	335.623	21.5558	27	3358
62	500.897	335.749	21.9116	27	3413
63	501.432	336.007	22.0396	27	3467
64	501.822	336.767	21.9965	27	3519
65	501.385	336.504	21.7293	27	3568
66	500.93	336.205	22.7193	27	3619
67	501.284	336.216	21.5079	27	3666
68	501.158	336.32	22.4783	27	3714
69	501.183	335.994	22.1453	27	3765
70	501.528	336.321	22.4833	27	3809
71	501.506	336.457	22.449	27	3859
72	501.485	336.388	22.7116	27	3909
73	501.681	336.628	22.9802	27	3959
74	500.716	335.701	23.4657	27	4006
75	500.934	335.652	23.5468	27	4053
76	501.062	335.658	23.3413	27	4101
77	501.311	335.834	23.5707	27	4148
78	501.19	335.905	23.7762	27	4194
79	501.092	335.704	24.1199	27	4237
80	500.937	335.831	24.0822	27	4284
81	500.727	335.86	25.5	27	4347
82	500.773	336.295	25.5	27	4390
83	501.567	336.938	25.5	27	4431
84	502.055	337.359	25.5	27	4471
85	502.746	337.946	25.5	27	4508
86	502.052	337.615	25.5	27	4546
87	501.976	338.233	25.5	27	4584
88	502.03	338.392	25.5	27	4620
89	501.956	338.193	25.5	27	4656
90	502.585	338.649	25.5	27	4691
91	502.936	338.685	25.5	27	4726
92	503.503	339.988	25.5	27	4760
93	502.798	339.161	25.5	27	4794
94	502.688	338.976	25.5	27	4828
95	502.921	339.159	25.5	27	4862
96	502.426	338.916	25.5	27	4895
97	502.923	338.798	25.5	27	4925
98	503.329	338.841	25.5	27	4958
99	502.706	339.375	25.5	27	4990
100	503.436	339.454	25.5	27	5022
101	505.677	341.358	25.5	27	5054
102	502.365	338.669	25.5	27	5087
103	502.246	338.589	25.5	27	5121
104	502.89	339.104	25.5	27	5154
105	504.172	339.644	25.5	27	5188
106	502.993	339.004	25.5	27	5219
107	502.825	338.607	25.5	27	5250
108	502.625	338.725	25.5	27	5280
109	505.349	340.811	25.5	27	5311
110	503.816	339.8	25.5	27	5341
111	506.053	340.767	25.5	27	5372
112	506.175	340.975	25.5	27	5403
113	503.003	338.775	25.5	27	5433
114	507.934	342.555	25.5	27	5462
115	505.439	340.762	25.5	27	5491
116	502.112	338.342	25.5	27	5521
117	505.564	340.82	25.5	27	5551
118	505.666	340.609	25.5	27	5580
119	507.934	342.733	25.5	27	5609
120	505.581	340.822	25.5	27	5637
121	507.934	342.666	25.5	27	5665
122	507.934	346.567	25.5	27	5693
123	507.934	345.182	25.5	27	5720
1	68.5805	61.58	14.8074	28	27
2	66.6941	64.0863	15.6995	28	75
3	68.2437	62.9204	15.6314	28	125
4	71.3159	61.2761	14.7744	28	173
5	69.966	61.8155	15.3434	28	224
6	72.4442	61.8048	15.0295	28	276
8	69.845	62.4643	16.3027	28	380
9	66.1081	64.4353	16.3404	28	434
11	68.1641	64.6208	16.251	28	542
12	77.4485	63.1668	17.0724	28	599
13	70.7966	62.4898	16.2728	28	656
14	70.4644	63.1532	10.3737	28	687
15	68.5986	62.7259	9.15668	28	745
16	70.663	63.3405	9.75562	28	806
17	73.9627	63.5348	9.94465	28	868
18	67.7459	64.2033	16.38	28	959
19	69.6886	63.1432	17.2959	28	1019
20	69.8091	62.9542	16.9582	28	1082
21	71.1065	61.4131	16.9323	28	1137
22	69.0423	62.4818	17.7841	28	1197
23	70.9764	62.5755	18.0033	28	1256
24	67.6672	64.5126	17.6681	28	1311
25	67.647	64.5188	18.0046	28	1371
26	70.7494	61.7047	17.6729	28	1432
27	69.0736	61.9414	17.8723	28	1491
28	70.7176	60.6634	17.8734	28	1550
29	68.4846	63.6129	18.3169	28	1608
30	68.8783	62.6207	18.4075	28	1667
31	68.0876	63.6093	18.5669	28	1724
32	69.0698	63.6831	18.9829	28	1781
33	66.5698	63.9061	19.5017	28	1839
34	70.7517	59.8701	18.2791	28	1895
1	162.338	77.8961	16.1871	29	28
2	161.402	79.0144	15.9632	29	76
3	161.904	78.4493	16.0138	29	126
4	163.546	78.3485	15.4053	29	174
[truncated: 5,054 more rows]
