# Supplementary material for: Functional visualization of NK cell-mediated killing of metastatic single tumor cells
Source: eLife journal article supplement (doi:10.7554/elife.76269), 2022-02-03
Supplement: supp [file nk_pos_2.xlsx]

## Sheet: Sheet1
1	102.112	233.973	5.5	1	0
2	102.284	235.729	5.5	1	37
3	102.152	234.676	5.5	1	73
4	101.272	237.469	5.5	1	113
5	102.16	236.397	5.5	1	153
6	101.797	234.273	5.5	1	195
7	101.706	234.246	5.5	1	238
8	101.851	234.4	5.5	1	281
9	102.057	234.523	5.5	1	325
10	101.227	233.441	5.5	1	372
11	101.245	233.778	5.5	1	416
12	100.905	234.116	5.5	1	464
13	101.605	234.016	5.5	1	513
14	101.174	233.711	5.5	1	561
15	101.077	233.564	5.5	1	611
16	101.57	233.853	5.5	1	661
17	101.329	233.69	5.5	1	711
18	101.353	232.704	5.5	1	762
19	101.088	233.401	5.5	1	814
20	101.097	233.036	5.5	1	866
21	101.332	232.457	5.5	1	920
22	101.608	233.451	5.5	1	972
23	101.621	233.28	5.5	1	1027
24	101.331	232.873	5.5	1	1078
25	101.556	233.022	5.5	1	1130
26	100.635	243.398	5.5	1	1183
27	97.2036	250.22	5.5	1	1233
28	97.3911	250.059	5.5	1	1283
29	91.6907	262.045	5.5	1	1342
30	91.4437	262.373	5.5	1	1392
31	91.5322	262.918	5.5	1	1441
32	91.9612	264.43	5.5	1	1488
33	91.5797	264.779	5.5	1	1538
34	91.6242	264.407	5.5	1	1592
35	90.1637	262.558	5.5	1	1644
36	47.2838	288.86	7.42078	1	1691
37	41.6784	306.601	13.7088	1	1748
38	36.1773	314.577	7.29683	1	1790
39	43.6887	314.513	22.6417	1	1867
40	43.8753	314.979	22.1607	1	1916
42	43.1048	316.87	23.8927	1	2010
43	39.267	318.277	22.9107	1	2058
1	28.2755	238.906	5.5	2	1
2	28.6406	238.504	5.5	2	38
3	28.4222	238.563	5.5	2	74
4	28.7392	238.66	5.5	2	114
5	28.7034	238.816	5.5	2	154
6	28.4851	238.59	5.5	2	196
7	28.3557	238.677	5.5	2	239
8	28.9023	238.392	5.5	2	282
9	28.333	238.311	5.5	2	326
10	28.6184	238.443	5.5	2	373
11	28.4015	238.382	5.5	2	417
12	29.0246	238.461	5.5	2	465
13	28.2563	238.143	5.5	2	514
14	28.3824	237.854	5.5	2	562
15	28.2313	237.69	5.5	2	612
16	28.062	237.803	5.5	2	662
17	28.7022	237.616	5.5	2	712
18	28.7105	237.548	5.5	2	763
19	28.342	237.761	5.5	2	815
20	28.1519	237.655	5.5	2	867
21	28.1674	237.334	5.5	2	921
22	27.9579	237.31	5.5	2	973
23	27.8409	237.261	5.5	2	1028
24	27.7264	237.146	5.5	2	1079
25	27.8271	236.802	5.5	2	1131
26	27.9674	237.203	5.5	2	1182
27	27.7355	237.029	5.5	2	1232
28	27.6684	236.943	6.95944	2	1284
29	27.9118	237.251	7.11055	2	1335
30	28.031	237.162	7.3908	2	1384
31	27.8817	237.403	7.31852	2	1433
32	28.169	238.082	7.27928	2	1482
33	28.5845	238.244	7.60485	2	1534
34	28.4687	238.52	8.04518	2	1587
35	28.6988	238.669	7.96549	2	1640
36	28.9538	239.011	7.90366	2	1688
37	29.0798	239.079	8.81268	2	1739
38	29.683	239.059	8.71392	2	1787
39	55.7817	246.551	23.6505	2	1860
40	38.3539	262.985	25.5	2	1930
41	35.7587	262.755	25.5	2	1976
42	31.9721	281.668	25.5	2	2023
43	32.4433	282.477	25.5	2	2071
44	29.9337	285.135	25.5	2	2116
45	26.5614	292.046	25.5	2	2164
46	23.857	294.37	25.5	2	2209
1	200.183	2.98023e-08	8.85919	3	2
2	201.137	2.98023e-08	7.4373	3	39
3	200.838	2.98023e-08	7.56534	3	75
4	203.154	5.58459	7.87003	3	115
5	206.341	5.99227	7.7286	3	155
6	211.226	6.96106	7.5193	3	198
7	216.92	5.30595	8.18518	3	240
8	216.686	2.98023e-08	10.5062	3	284
9	217.852	2.98023e-08	10.2893	3	328
10	218.128	2.98023e-08	10.3991	3	375
11	214.581	2.98023e-08	10.7302	3	418
12	213.692	2.98023e-08	10.4445	3	466
13	211.922	5.41992	12.7068	3	519
14	211.624	5.43608	12.5746	3	568
15	211.174	5.56631	12.7871	3	618
16	211.637	5.23463	12.5333	3	668
17	217.633	2.98023e-08	10.8421	3	713
18	218.433	2.98023e-08	10.9326	3	764
19	218.374	2.98023e-08	11.162	3	816
20	218.565	2.98023e-08	11.7857	3	871
21	218.837	2.98023e-08	10.9117	3	922
22	218.944	2.98023e-08	11.4013	3	975
23	218.95	2.98023e-08	11.033	3	1029
1	153.19	34.456	9.74699	4	3
2	151.748	33.3223	9.33577	4	40
3	152.189	35.1572	9.6745	4	76
4	151.1	37.8505	10.3901	4	117
5	151.665	38.2166	10.5175	4	157
6	151.374	38.9971	11.4177	4	199
7	150.111	39.3414	11.5299	4	241
8	148.272	40.4937	11.9846	4	289
9	146.795	41.4606	11.9077	4	332
10	145.673	42.0821	11.8021	4	379
11	145.177	42.6568	11.6368	4	419
12	145.418	42.837	11.2117	4	467
13	145.06	43.2915	11.9098	4	520
14	144.282	44.2307	12.1895	4	570
15	143.577	44.6213	12.5578	4	619
16	142.87	45.2063	12.3228	4	669
17	141.688	45.9972	12.2057	4	719
18	140.956	46.0432	12.461	4	770
19	139.78	45.8024	12.4656	4	819
20	138.299	46.2789	12.8285	4	872
21	137.37	46.7075	12.8531	4	925
22	137.599	45.8865	12.2229	4	978
23	138.245	44.7262	11.8439	4	1030
24	140.421	42.5621	12.6897	4	1083
25	143.634	43.3272	13.696	4	1134
26	142.952	43.2965	13.9273	4	1186
27	142.919	43.4088	13.6147	4	1236
28	142.866	42.7108	13.202	4	1287
29	142.078	43.0266	13.2763	4	1336
30	142.416	42.9386	13.7773	4	1386
31	144.832	42.9653	14.0523	4	1436
32	145.448	42.7933	14.1219	4	1485
33	144.417	43.815	14.2721	4	1556
34	144.818	43.8015	14.4631	4	1609
35	145.229	43.5346	14.6744	4	1660
36	144.339	43.9292	14.3656	4	1707
37	144.542	44.1789	14.9718	4	1758
38	145.052	44.0815	15.067	4	1806
39	143.082	45.8725	14.9987	4	1855
40	143.36	46.14	15.063	4	1903
41	143.475	46.3655	15.3345	4	1951
42	142.797	46.217	15.1801	4	1998
43	142.532	47.0536	15.0828	4	2046
44	141.71	46.2787	15.1446	4	2093
45	140.899	46.033	15.0645	4	2138
46	140.223	46.009	14.7053	4	2183
47	140.239	45.8039	14.7553	4	2231
48	141.228	44.9518	14.662	4	2273
49	144.689	44.9028	15.1613	4	2318
50	144.155	45.6308	15.0055	4	2366
51	144.439	45.3228	15.2157	4	2412
52	144.435	45.0619	15.2198	4	2456
53	143.96	44.882	15.1976	4	2501
54	144.361	44.6864	15.2837	4	2546
55	145.2	44.179	15.2683	4	2589
56	144.603	44.9897	15.2781	4	2637
57	143.703	45.084	15.3557	4	2681
58	145.352	44.2882	15.5989	4	2725
59	146.227	43.3551	15.6599	4	2769
60	146.027	43.267	15.756	4	2817
61	145.472	43.7368	15.9068	4	2864
62	145.374	43.6074	15.6543	4	2910
63	143.599	44.3921	15.6008	4	2958
64	139.053	44.7366	15.31	4	3001
65	137.394	44.1312	15.2279	4	3047
66	137.549	44.4357	15.3277	4	3089
67	138.098	44.5021	15.6818	4	3130
68	137.707	44.4106	15.7663	4	3174
69	137.36	44.0536	15.7879	4	3214
70	137.367	44.051	15.9107	4	3255
71	136.541	44.4263	16.1946	4	3298
72	135.567	43.9489	16.817	4	3338
73	132.698	44.9963	17.2258	4	3377
74	131.368	45.8619	17.2806	4	3417
75	131.333	46.1671	17.2265	4	3455
76	131.907	46.5178	16.6567	4	3493
77	130.045	48.3258	17.2199	4	3531
78	119.916	57.7782	16.6138	4	3571
79	120.615	58.5419	16.4816	4	3609
80	121.406	59.2837	16.5708	4	3650
81	121.867	59.6917	16.4938	4	3690
82	122.637	59.6107	16.7431	4	3730
83	120.274	53.6691	19.0769	4	3775
84	120.14	53.2289	18.8586	4	3815
85	120.24	53.8406	18.4974	4	3854
86	120.146	53.6925	18.4968	4	3893
87	120.118	54.5106	17.9434	4	3932
88	120.585	57.1549	16.342	4	3969
89	115.986	63.151	25.5	4	4028
90	115.137	66.6728	25.5	4	4063
1	15.0642	35.7705	11.4205	5	4
2	14.8768	35.492	11.5418	5	41
3	14.9002	35.5866	11.5811	5	77
4	14.8989	35.4554	13.9038	5	121
5	15.1215	35.587	12.9106	5	161
6	14.6116	35.7634	13.9795	5	203
7	14.2223	35.5688	14.0025	5	245
8	13.941	35.1189	12.8875	5	288
9	13.7246	35.75	14.507	5	352
10	13.6421	36.0929	14.994	5	399
11	13.6322	36.3019	15.4109	5	444
12	14.1487	36.5778	15.2642	5	494
13	14.4413	36.0395	14.6395	5	543
14	14.0395	34.8967	14.1583	5	569
15	13.5896	35.4176	14.867	5	642
16	13.7889	34.9304	14.3201	5	690
17	14.4794	34.844	13.9266	5	718
18	14.1364	35.8157	15.2116	5	792
19	14.1142	35.7418	15.5642	5	844
20	13.8786	35.7179	15.7137	5	896
21	13.5869	35.4171	15.6247	5	950
22	13.5117	35.2534	15.4906	5	1002
23	13.5465	34.8521	15.2746	5	1054
24	13.8831	34.7412	15.1539	5	1104
25	14.2129	34.7205	15.1012	5	1155
26	14.0428	35.6727	16.1529	5	1208
27	14.0233	34.6101	14.7191	5	1254
28	13.8937	34.5826	15.073	5	1308
29	13.9625	34.4128	14.8743	5	1359
30	14.1186	34.6816	15.7606	5	1407
31	14.2355	35.3786	16.5005	5	1458
32	14.4239	36.0441	16.3179	5	1506
33	14.6741	36.8082	16.2904	5	1555
34	14.3304	37.8555	17.1791	5	1612
35	12.8958	39.7521	18.5517	5	1663
36	12.3027	39.8021	19.2296	5	1711
37	12.2039	40.7378	19.8321	5	1764
38	12.1143	40.4158	19.7772	5	1811
39	12.8308	40.4558	19.6761	5	1859
40	13.4476	40.4836	19.6747	5	1907
41	13.9849	41.158	19.4052	5	1954
42	14.1391	40.68	19.0591	5	2000
43	13.6656	41.0431	19.3625	5	2049
44	12.6955	41.3227	19.8282	5	2096
45	12.5434	41.5156	19.7256	5	2141
46	13.4189	41.7269	19.1095	5	2185
47	13.4249	42.3094	18.5871	5	2233
48	13.01	41.4489	19.4732	5	2277
49	12.7425	40.7333	19.5186	5	2324
50	12.5181	40.3474	19.5686	5	2369
51	12.0233	40.4135	19.7012	5	2415
52	12.4907	40.4039	19.6431	5	2459
53	13.0165	40.5673	19.7173	5	2504
54	13.4196	40.574	19.479	5	2549
55	13.2945	41.0292	19.5428	5	2592
56	13.5626	40.2995	19.7826	5	2639
57	13.0735	39.7416	20.2016	5	2683
58	12.9457	39.8038	20.288	5	2729
59	12.6311	39.6828	20.1689	5	2774
60	13.1287	40.0659	20.4991	5	2820
61	13.6685	40.005	20.1136	5	2867
62	13.2756	40.2466	20.2213	5	2914
63	13.1328	39.9745	20.1987	5	2962
64	12.4365	39.8475	20.4621	5	3006
65	12.176	40.3759	20.7737	5	3052
66	12.619	40.1638	20.5721	5	3092
67	13.3793	40.4321	20.7073	5	3132
68	13.2783	40.4769	21.076	5	3176
69	13.8513	41.1164	21.4214	5	3217
70	13.3409	41.0498	21.3496	5	3258
71	12.8703	40.8524	21.4485	5	3301
72	12.8426	41.6092	22.3363	5	3339
73	13.2374	41.4331	22.302	5	3378
74	13.4042	41.565	22.8371	5	3418
75	13.8698	42.328	22.0589	5	3457
76	14.0698	42.2757	22.6331	5	3496
77	13.513	42.1255	22.1313	5	3533
78	13.4582	42.1418	23.431	5	3574
79	13.4847	41.9056	22.1972	5	3613
80	13.3726	42.629	22.9024	5	3654
81	13.556	42.6995	22.7967	5	3694
82	14.3684	42.9384	23.0041	5	3736
83	14.3307	42.6656	23.2801	5	3777
84	13.7309	42.3358	22.8575	5	3817
85	13.2561	42.0935	22.9262	5	3857
86	13.5355	42.0692	23.0372	5	3897
87	13.8631	42.0386	23.2698	5	3936
88	14.0481	42.0058	23.0646	5	3972
89	13.9146	42.5042	22.6809	5	4011
90	13.845	42.3057	22.871	5	4049
91	13.8003	42.0605	22.8084	5	4086
92	12.8766	41.5121	23.8865	5	4124
93	13.1229	41.4065	22.3872	5	4161
94	13.2101	41.6385	22.7895	5	4195
95	13.7217	41.5131	22.934	5	4232
96	13.7903	41.797	23.5423	5	4267
97	14.0282	42.2594	23.4424	5	4302
98	13.0317	41.2729	23.7056	5	4336
99	13.1581	41.2457	23.403	5	4371
100	13.0369	41.0132	23.6749	5	4403
101	13.0329	41.1571	23.738	5	4436
102	13.7869	41.6439	24.1587	5	4469
103	13.1423	41.5192	25.5	5	4518
104	13.2806	41.7481	25.5	5	4548
105	13.1859	41.4097	23.7212	5	4565
106	13.6704	40.0639	21.2503	5	4598
1	7.76586	72.6059	10.0523	6	5
2	10.446	69.1255	10.1105	6	42
3	8.74748	71.4943	10.1292	6	78
4	8.27379	71.2047	10.1548	6	118
5	8.39784	71.0776	10.0065	6	158
6	9.69459	70.6928	10.0756	6	200
7	6.99243	72.3064	10.1311	6	242
8	6.0822	73.0055	10.0843	6	285
9	3.38725	73.3298	10.2061	6	329
10	3.2442	73.4307	10.5749	6	376
11	2.98023e-08	73.4247	10.8956	6	420
12	2.98023e-08	73.5083	11.0392	6	468
13	0.588738	73.2834	10.3928	6	515
14	4.08788	73.1124	10.9823	6	563
15	2.98023e-08	73.2153	11.1775	6	613
16	2.98023e-08	72.9429	11.1696	6	663
17	2.98023e-08	72.9185	11.2354	6	714
18	2.98023e-08	72.9202	11.2815	6	765
19	2.98023e-08	72.9074	11.6806	6	817
20	3.78186	72.7451	11.5705	6	868
21	1.4383	73.0214	11.694	6	923
22	8.37686	72.7812	11.7734	6	976
1	176.882	103.195	9.91108	7	6
2	177.676	102.149	9.89949	7	43
3	176.957	103.393	10.1131	7	80
4	176.947	102.849	9.73411	7	119
5	177.099	102.298	9.68321	7	159
6	177.153	102.763	9.94449	7	201
7	177.379	102.006	9.85948	7	243
8	177.503	101.173	10.2408	7	286
9	177.269	101.772	10.0204	7	330
10	176.806	102.012	10.078	7	377
11	176.953	101.592	10.4249	7	421
12	177.003	101.481	10.1859	7	469
13	177.022	101.635	10.2479	7	516
14	177.151	101.255	10.5316	7	565
15	177.028	101.678	10.0805	7	614
16	177.019	101.132	10.2741	7	664
17	176.896	100.989	10.4209	7	715
18	176.996	100.299	10.4562	7	767
19	194.262	79.6412	13.2743	7	820
21	162.497	94.0673	17.0595	7	951
22	166.593	94.6445	16.0254	7	1003
23	168.842	96.7582	16.0181	7	1055
24	171.934	99.116	15.1048	7	1105
25	170.218	96.0908	15.9934	7	1156
26	168.692	95.4124	16.3027	7	1209
27	169.024	95.5429	16.1255	7	1255
28	169.276	95.5317	16.2887	7	1309
29	169.963	95.6778	16.4587	7	1360
30	170.027	96.1334	16.9292	7	1409
31	171.122	96.6451	16.403	7	1459
32	171.197	96.757	16.6242	7	1507
33	170.931	97.2888	16.408	7	1558
34	170.788	97.2902	16.9391	7	1614
35	170.346	97.2648	17.0986	7	1665
36	171.26	97.6387	17.2743	7	1713
37	171.353	97.9126	17.5372	7	1761
38	171.761	98.1907	17.6031	7	1809
39	172.262	99.5598	17.6223	7	1857
40	172.609	99.4974	18.0146	7	1905
41	171.718	100.034	17.9365	7	1953
42	171.91	99.5011	17.6619	7	2001
43	171.566	98.3853	17.6437	7	2048
44	172.252	98.1539	17.4844	7	2095
45	171.859	97.6715	17.6064	7	2140
46	172.679	97.8334	17.4782	7	2186
47	170.897	97.2754	17.785	7	2234
48	170.853	97.8022	17.6535	7	2276
49	170.747	97.7141	17.5462	7	2323
50	172.206	98.1978	17.7238	7	2368
51	182.766	94.3275	15.4962	7	2413
52	185.049	91.2404	15.3109	7	2457
53	202.288	94.4657	15.8355	7	2502
54	202.035	95.0477	15.9173	7	2547
55	202.869	93.037	14.8861	7	2590
56	203.037	89.0506	13.8332	7	2620
57	202.943	88.344	13.9998	7	2665
58	202.416	88.777	14.1442	7	2709
59	201.944	88.3661	14.048	7	2756
60	201.542	88.3029	14.0023	7	2802
61	201.627	87.8011	14.1194	7	2849
62	201.513	87.7555	14.1385	7	2896
63	200.561	87.804	14.1133	7	2942
64	195.95	81.6893	15.8471	7	3002
65	195.128	82.5392	15.5437	7	3048
1	158.015	107.503	10.3797	8	7
2	158.971	109.243	10.8488	8	44
3	158.687	108.237	10.602	8	81
4	158.236	107.823	10.3517	8	120
5	157.881	107.069	10.1433	8	160
6	157.761	107.157	10.1154	8	202
7	158.227	108.807	10.4265	8	244
8	158.241	109.512	10.5832	8	287
9	158.387	108.519	10.3926	8	331
10	158.12	108.01	10.5094	8	378
11	157.012	106.563	10.4518	8	422
12	157.029	106.846	10.3896	8	470
13	157.477	107.882	10.6732	8	517
14	157.492	106.562	10.732	8	566
15	156.611	105.6	10.5083	8	616
16	155.762	104.449	10.6023	8	665
17	150.929	104.219	10.3817	8	717
18	154.826	103.868	10.7234	8	768
19	155.285	103.98	10.6758	8	818
20	157.066	107.577	11.1315	8	870
21	158.979	108.387	11.8703	8	926
22	158.949	108.493	11.9704	8	979
23	159.344	108.597	12.1966	8	1032
24	157.684	108.619	11.6197	8	1082
25	156.714	105.957	10.9823	8	1133
26	156.846	106.316	11.1723	8	1185
27	156.593	106.299	10.9961	8	1235
28	157.716	106.31	11.5546	8	1286
29	158.26	108.731	12.2813	8	1339
30	158.487	108.441	12.1707	8	1390
31	156.923	107.419	11.5749	8	1434
32	156.965	106.205	11.576	8	1483
33	156.948	106.349	11.7431	8	1535
34	156.849	105.768	12.2135	8	1589
35	157.321	106.156	12.2916	8	1642
36	156.871	106.026	12.5798	8	1689
37	157.824	106.365	12.5676	8	1740
38	156.988	106.751	12.5969	8	1788
39	157.275	106.564	12.5813	8	1838
40	157.377	106.415	12.8504	8	1887
41	157.13	106.784	12.6442	8	1936
42	157.278	106.571	12.7496	8	1982
43	158.158	107.028	12.8881	8	2030
44	158.399	106.501	12.9085	8	2077
45	157.645	105.936	12.7953	8	2123
46	157.366	106.609	12.7621	8	2170
47	157.466	106.633	12.9009	8	2216
48	156.955	106.828	12.6361	8	2260
49	156.014	106.521	12.6489	8	2303
50	156.925	106.667	12.8292	8	2350
51	157.985	106.328	12.9235	8	2395
52	157.904	106.005	13.0827	8	2440
53	157.597	106.133	12.94	8	2484
54	158.526	105.774	13.3236	8	2528
55	158.725	105.554	13.3684	8	2574
56	158.834	105.224	13.2223	8	2621
57	159.225	105.005	13.4839	8	2666
58	162.982	101.189	14.3032	8	2727
59	164.108	100.025	14.5089	8	2772
60	163.863	99.9645	14.3634	8	2818
61	163.895	99.8997	14.6218	8	2865
62	164.189	100.093	14.6256	8	2912
63	164.125	100.156	14.8595	8	2960
64	164.098	100.039	15.0773	8	3004
65	164.142	99.4143	14.6075	8	3050
66	164.861	98.1253	14.6124	8	3091
67	165.398	97.8938	14.8223	8	3131
68	166.339	96.5586	14.9179	8	3175
69	167.91	94.8598	14.8738	8	3216
70	166.012	97.9397	15.1339	8	3257
71	166.207	98.3005	15.1215	8	3300
72	166.981	97.6375	15.3612	8	3337
73	166.235	98.4575	15.4204	8	3376
74	167.859	96.6523	15.6085	8	3416
75	167.576	97.0307	15.4751	8	3454
76	167.169	98.4194	15.6887	8	3494
77	168.293	97.8382	15.7973	8	3530
78	168.098	98.371	15.6192	8	3572
79	168.729	97.2852	15.9488	8	3610
80	169.213	96.571	15.8822	8	3651
81	168.453	97.6924	15.9991	8	3691
82	168.695	97.3656	15.9291	8	3731
83	168.58	97.3087	15.9214	8	3771
84	168.831	97.5544	16.109	8	3812
85	168.934	97.5922	15.8524	8	3852
86	169.021	96.8095	15.9372	8	3892
87	168.195	97.3542	15.8067	8	3931
88	168.032	97.469	15.7571	8	3970
89	167.973	97.5818	15.6373	8	4008
90	167.792	97.6885	15.8525	8	4045
91	167.359	98.8862	15.9471	8	4083
92	167.734	98.0231	15.8432	8	4121
93	167.826	97.287	15.9316	8	4156
94	167.565	97.3784	15.9063	8	4192
95	167.566	97.0892	15.8435	8	4228
96	168.398	96.8766	16.1643	8	4262
97	167.872	96.9796	16.1044	8	4299
98	168.555	96.0919	16.1794	8	4334
99	168.201	96.3718	16.5612	8	4368
100	168.682	94.9697	16.5095	8	4399
101	168.392	95.3894	16.4456	8	4431
102	168.544	95.2044	16.5695	8	4464
103	168.577	95.1802	16.6164	8	4498
104	168.468	95.8061	16.8759	8	4530
105	168.574	95.0626	17.0486	8	4562
106	168.923	94.4841	17.1349	8	4595
1	220.062	196.472	13.3281	9	8
2	221.125	193.888	14.4524	9	63
3	223.564	198.519	13.1499	9	82
4	225.623	200.562	13.6128	9	122
5	223.233	198.011	13.919	9	162
6	224.405	197.688	12.8763	9	205
7	219.447	191.201	14.2139	9	247
8	222.957	195.647	12.5154	9	290
9	220.349	192.871	15.3631	9	353
11	225.381	200.076	15.9818	9	445
12	226.467	202.22	14.2598	9	495
13	223.74	197.697	13.6666	9	522
14	226.778	199.337	13.8955	9	571
15	224.991	177.624	11.7531	9	620
16	222.365	173.232	11.252	9	667
17	221.202	160.075	12.4107	9	720
18	220.187	157.657	12.1211	9	771
19	214.708	158.428	12.6363	9	822
20	212.147	153.768	13.7335	9	873
21	215.659	143.801	12.2133	9	927
22	213.755	131.655	14.6611	9	1004
23	211.626	123.289	16.8889	9	1056
1	310.093	109.449	11.3395	10	9
2	310.364	109.583	11.5259	10	45
3	310.92	109.372	11.3361	10	83
4	319.523	114.307	12.8787	10	123
5	317.997	113.697	12.5499	10	163
6	319.081	111.9	12.6591	10	206
7	321.72	112.997	14.1447	10	248
9	297.344	148.443	18.1075	10	357
11	278.186	165.779	7.57634	10	424
12	268.542	167.247	10.8875	10	473
13	266.651	168.322	10.7014	10	523
14	266.462	168.418	11.1087	10	572
15	276.538	163.606	13.5545	10	623
16	278.736	164.169	13.8409	10	673
17	282.57	160.35	13.1901	10	724
18	283.885	156.92	14.0287	10	774
19	318.455	177.933	9.3609	10	824
20	332.407	177.882	9.49916	10	876
21	345.093	178.903	10.7186	10	929
22	351.221	174.784	12.5656	10	982
23	353.147	173.753	13.0516	10	1035
24	314.959	149.933	19.7882	10	1110
1	452.253	153.478	12.4651	11	10
2	453.061	154.242	12.7698	11	46
3	452.853	153.866	12.6887	11	84
4	452.239	153.249	12.8807	11	124
5	452.096	153.024	12.7717	11	164
6	452.178	153.077	12.8778	11	207
7	452.264	153.211	12.8352	11	249
8	452.555	153.273	12.8046	11	291
9	452.204	153.055	12.9298	11	333
10	452.114	153.194	13.067	11	380
11	452.015	153.041	13.0987	11	425
12	451.977	153.196	13.0251	11	474
13	451.967	152.839	13.2349	11	524
14	452.187	152.895	13.4524	11	573
15	452.387	153.276	13.2388	11	622
16	452.223	153.161	13.4341	11	672
17	452.042	152.919	13.3529	11	723
18	451.718	152.646	13.3913	11	773
19	451.957	153.071	13.5939	11	826
20	451.781	152.512	13.8746	11	877
21	452.309	152.703	13.9098	11	930
22	452.241	152.723	14.005	11	981
23	452.249	152.731	13.9953	11	1034
24	452.007	152.276	14.4531	11	1107
25	451.713	152.182	14.0324	11	1136
26	451.957	152.744	13.8434	11	1189
27	451.559	152.093	14.4737	11	1257
28	452.024	152.389	14.3876	11	1311
29	452.443	152.813	14.3389	11	1361
30	452.459	152.82	14.3795	11	1410
31	452.225	152.893	14.5203	11	1461
32	451.804	153.127	14.5751	11	1510
33	452.022	153.222	14.7134	11	1563
34	452.488	153.545	15.1617	11	1616
35	453.108	154.147	15.3372	11	1666
36	452.815	153.938	15.2614	11	1716
37	453.271	154.191	15.4511	11	1765
38	453.443	154.355	15.4269	11	1812
39	453.485	154.784	15.4124	11	1861
40	453.408	154.253	15.4808	11	1908
41	453.868	155.023	15.5624	11	1956
42	453.964	155.108	15.4973	11	2003
43	453.827	155.012	15.6408	11	2052
44	453.928	154.702	15.6619	11	2099
45	453.726	154.641	15.7935	11	2143
46	453.281	154.467	15.7082	11	2188
47	453.301	154.527	16.1316	11	2236
48	453.544	154.66	15.9108	11	2279
49	453.416	154.496	15.9795	11	2325
50	453.304	154.408	15.8637	11	2370
51	453.061	154.396	15.7865	11	2416
52	453.155	154.041	15.8459	11	2460
53	453.005	154.015	15.9692	11	2505
54	453.303	154.272	16.0094	11	2550
55	453.434	153.98	16.2249	11	2593
56	453.428	153.79	16.3784	11	2640
57	453.575	153.811	16.1002	11	2684
58	453.508	153.922	16.2016	11	2730
59	453.491	153.817	16.2233	11	2775
60	453.332	153.956	16.5377	11	2821
61	448.126	153.222	10.6836	11	2851
62	453.804	154.021	16.2553	11	2915
63	447.744	153.92	11.4964	11	2944
64	450.421	153.546	11.0888	11	2988
65	458.281	155.978	9.5178	11	3033
66	464.373	151.683	9.81861	11	3077
67	462.857	153.589	9.88158	11	3119
68	460.399	155.34	10.0709	11	3162
69	453.382	153.124	17.4685	11	3219
70	453.94	153.899	17.4225	11	3260
71	454.003	154.233	17.4548	11	3303
72	453.9	153.894	17.6961	11	3341
73	453.492	153.666	17.862	11	3380
74	453.697	153.807	18.0121	11	3420
75	453.812	154.342	18.1673	11	3459
1	353.996	155.419	14.0441	12	11
2	354.582	154.915	14.0917	12	47
3	354.216	155.129	13.8781	12	85
4	354.195	155.327	13.8461	12	125
5	353.739	154.762	14.0641	12	165
6	354.085	155.348	14.458	12	223
7	356.227	160.161	14.6575	12	266
8	356.413	160.31	14.3968	12	310
9	356.883	160.414	14.4374	12	355
10	357.003	159.899	14.5327	12	402
11	357.538	160.188	14.778	12	447
12	357.121	159.896	14.8809	12	498
13	357.256	159.593	14.7871	12	545
14	358.075	159.64	14.9638	12	595
15	357.034	159.776	14.9074	12	644
16	356.314	157.499	14.8101	12	692
17	353.741	154.666	14.7938	12	742
18	353.561	154.396	14.7097	12	794
19	353.36	154.791	14.9379	12	846
20	353.597	154.608	14.9238	12	898
21	353.704	154.856	15.339	12	953
22	353.616	155.007	15.1356	12	1007
23	353.77	154.73	15.4073	12	1059
24	356.171	159.6	16.3331	12	1108
25	357.172	159.596	15.9721	12	1160
26	353.278	154.516	15.6019	12	1211
27	353.124	153.9	15.585	12	1258
28	353.069	153.997	15.9745	12	1312
29	353.524	154.676	16.1541	12	1362
30	353.628	154.423	15.6823	12	1411
31	353.464	154.743	15.6383	12	1462
32	353.122	154.861	15.4887	12	1511
33	353.632	154.974	15.9016	12	1564
34	353.878	154.873	16.3218	12	1617
35	353.832	155.298	16.4153	12	1667
36	353.893	155.409	16.0873	12	1717
37	354.637	155.328	16.3385	12	1766
38	354.706	155.748	16.5985	12	1813
39	354.744	155.808	16.525	12	1862
40	354.514	155.545	17.0521	12	1909
41	354.943	156.462	17.0035	12	1957
42	355.198	156.442	17.4489	12	2004
43	355.226	156.007	17.1037	12	2053
44	354.998	156.055	17.2959	12	2100
45	355.138	156.126	16.8906	12	2145
46	354.935	156.345	17.1257	12	2191
47	354.726	156.036	17.1485	12	2238
48	354.902	156.59	17.2588	12	2280
49	355.179	156.029	17.0862	12	2327
50	355.07	155.968	16.9642	12	2372
51	355.109	156.225	17.1941	12	2417
52	354.889	155.655	17.4455	12	2461
53	354.714	155.679	17.59	12	2506
54	354.557	155.785	17.6673	12	2551
55	354.924	155.935	17.7	12	2594
56	354.936	155.773	17.485	12	2641
57	355.307	155.484	17.4611	12	2685
58	355.175	155.578	17.6325	12	2731
59	355.018	155.519	17.615	12	2776
60	354.714	155.499	17.7288	12	2822
61	354.878	155.761	17.7684	12	2869
62	355.113	155.682	17.7822	12	2917
63	355.005	155.614	17.756	12	2963
64	354.758	155.132	17.9119	12	3007
65	354.694	155.481	17.9034	12	3053
66	354.251	155.335	18.0239	12	3094
67	354.548	155.662	18.3182	12	3135
68	354.504	155.754	18.1603	12	3178
69	354.893	155.662	18.4614	12	3220
70	355.011	155.804	18.1817	12	3261
71	355.321	156.782	18.2855	12	3304
72	355.218	156.521	18.4806	12	3342
73	354.923	157.146	18.6788	12	3381
74	355.411	157.242	19.083	12	3421
75	355.655	157.875	19.263	12	3461
76	355.586	157.428	18.9362	12	3500
77	355.884	157.667	18.7529	12	3537
78	355.915	157.767	18.8573	12	3577
79	356.026	157.837	18.9316	12	3615
80	356.174	158.116	19.4283	12	3658
81	355.827	157.609	19.3595	12	3699
82	355.844	157.534	19.4299	12	3740
83	355.835	157.557	19.5594	12	3781
84	356.151	157.863	19.4665	12	3822
85	356.035	157.555	19.3347	12	3862
86	355.958	157.293	19.5843	12	3901
87	355.654	157.048	19.5347	12	3939
88	355.643	157.296	19.4296	12	3977
89	355.352	157.118	19.379	12	4013
90	355.628	157.056	19.2792	12	4050
91	355.961	156.779	19.3653	12	4088
92	355.824	156.874	19.1403	12	4126
93	355.798	156.831	19.2572	12	4164
94	355.661	157.184	19.3203	12	4199
95	355.587	157.282	19.5005	12	4234
96	355.73	156.439	19.431	12	4271
97	355.829	156.586	19.5108	12	4306
98	355.939	156.632	19.5479	12	4338
99	355.902	156.824	19.5345	12	4374
100	355.692	156.36	19.6796	12	4406
101	355.79	156.517	20.0517	12	4439
102	355.867	156.58	20.021	12	4472
103	355.408	156.389	19.9998	12	4505
104	355.9	156.088	20.0689	12	4534
105	355.832	155.629	19.9731	12	4567
106	356.192	155.335	19.9635	12	4603
1	241.618	360.726	5.5	13	12
2	241.378	361.124	5.5	13	48
3	244.881	362.666	5.5	13	86
4	244.4	362.739	5.5	13	126
5	241.504	360.129	5.5	13	166
6	241.707	359.41	5.5	13	208
7	241.861	360.16	5.5	13	251
8	241.093	359.531	7.09259	13	295
9	240.162	359.864	5.5	13	336
10	240.391	359.616	7.26248	13	385
11	240.454	359.823	7.10793	13	429
12	240.888	359.804	7.32552	13	477
13	241.009	358.87	7.24458	13	528
14	241.019	358.02	7.18255	13	576
15	240.714	358.61	7.35653	13	626
16	240.15	359.5	7.41934	13	676
17	240.038	359.135	8.08779	13	727
18	240.4	359.265	7.91683	13	776
19	240.784	358.611	8.20198	13	828
20	241.219	358.742	8.29321	13	879
21	241.164	358.217	8.74221	13	932
22	240.591	358.323	8.7434	13	985
23	240.236	358.299	8.83831	13	1038
24	239.872	358.706	8.79261	13	1088
25	240.302	358.729	8.92286	13	1139
26	240.556	358.845	9.37308	13	1194
27	240.86	358.802	9.16543	13	1239
28	241.2	359.591	9.15246	13	1292
29	241.157	358.962	9.55099	13	1347
30	240.32	358.781	9.6375	13	1397
31	240.313	358.935	9.804	13	1447
32	245.809	362.433	9.21793	13	1491
33	240.844	359.624	9.45838	13	1545
34	241.624	359.62	10.0941	13	1598
35	242.066	360.251	9.77462	13	1648
36	241.594	361.121	9.94783	13	1697
37	241.194	360.79	10.5019	13	1745
38	241.108	360.64	10.4723	13	1793
39	241.717	360.25	10.5098	13	1845
40	242.361	360.437	10.6704	13	1891
41	242.705	361.191	10.6228	13	1940
42	242.789	360.712	10.8374	13	1987
43	242.221	360.773	10.7998	13	2034
44	242.156	361.192	10.7762	13	2082
45	241.434	360.886	10.9273	13	2128
46	241.649	360.857	10.7159	13	2174
47	241.956	360.35	10.6861	13	2221
48	242.343	360.382	10.6765	13	2264
49	242.269	360.157	11.0302	13	2308
50	241.213	360.434	10.7656	13	2356
51	241.4	360.455	10.73	13	2401
52	241.148	360.602	11.2258	13	2445
53	241.232	360.373	11.1763	13	2489
54	242.306	360.391	11.0291	13	2534
55	242.511	360.357	11.2617	13	2578
56	242.257	360.296	11.1833	13	2625
57	242.219	359.961	11.2554	13	2671
58	241.311	359.957	11.8808	13	2719
59	241.44	359.881	11.7614	13	2763
60	241.292	359.751	11.4098	13	2806
61	241.703	359.656	11.71	13	2854
62	242.356	359.997	11.5417	13	2900
63	241.744	359.453	11.5318	13	2947
64	241.027	359.543	11.4626	13	2991
65	241.086	359.62	11.3688	13	3036
66	241.882	360.293	11.5494	13	3080
67	241.524	360.347	11.8995	13	3123
68	241.84	359.92	12.0906	13	3167
69	242.802	359.717	12.4924	13	3207
70	242.484	359.495	11.962	13	3248
71	241.826	360.417	12.3323	13	3290
72	241.817	360.75	12.3414	13	3332
73	242.239	360.969	12.5064	13	3371
74	241.999	360.961	12.856	13	3410
75	242.513	361.077	12.7311	13	3449
76	242.806	361.585	13.0347	13	3489
77	243.19	361.753	13.0448	13	3526
78	243.435	362.369	12.6792	13	3566
79	243.279	362.318	13.0096	13	3605
80	243.096	362.377	13.0512	13	3646
81	243.106	362.164	13.0917	13	3685
82	243.753	361.514	13.223	13	3725
83	244.369	362.618	13.2085	13	3767
84	243.956	362.592	13.0995	13	3807
85	243.575	362.376	12.881	13	3848
86	242.265	362.226	13.0482	13	3887
87	242.763	361.413	13.0343	13	3926
88	242.652	361.392	13.0021	13	3963
89	243.47	361.36	12.9806	13	4002
90	243.398	361.706	12.9981	13	4041
91	243.292	361.736	12.9412	13	4078
92	242.837	361.859	13.0288	13	4116
93	242.134	361.653	13.2319	13	4151
94	242.269	361.564	13.3405	13	4186
95	242.877	360.918	13.4533	13	4221
96	243.428	361.116	13.1246	13	4257
97	243.65	360.963	13.4651	13	4293
98	243.022	360.813	13.0852	13	4327
99	242.438	360.755	13.483	13	4361
100	242.309	360.818	13.7573	13	4393
101	242.576	361.147	13.8274	13	4425
102	244.238	361.578	13.5841	13	4459
103	243.325	361.034	13.9998	13	4492
104	243.246	361.159	13.9528	13	4524
105	243.254	361.137	13.8268	13	4556
106	242.368	360.981	13.8927	13	4589
1	33.9923	368.659	5.5	14	13
2	32.6806	375.821	5.5	14	49
3	29.318	365.413	5.5	14	87
4	28.2183	364.588	5.5	14	127
5	29.4749	365.987	7.00258	14	169
6	28.1058	364.649	5.5	14	209
7	26.5275	363.147	5.5	14	252
8	25.6766	362.421	5.5	14	293
9	19.9565	359.056	5.5	14	335
10	20.0448	359.131	5.5	14	382
11	19.6281	358.894	5.5	14	427
12	19.6043	359.264	5.5	14	476
13	19.4324	359.275	5.5	14	526
14	19.2274	359.055	5.5	14	575
15	16.5188	358.945	7.21508	14	625
16	16.295	358.816	7.90373	14	675
17	15.7914	358.603	8.6069	14	726
18	14.7366	358.989	9.25677	14	781
19	14.3389	358.925	10.0782	14	833
20	14.1644	358.847	10.5753	14	883
21	13.2436	358.698	11.1737	14	936
22	12.6094	358.837	10.957	14	988
23	12.6163	358.497	11.0835	14	1041
24	12.3955	358.147	10.9237	14	1090
25	12.801	358.368	11.1749	14	1142
26	11.5443	357.702	11.1988	14	1193
27	11.1177	357.649	11.142	14	1241
28	9.50702	356.893	11.0361	14	1296
29	8.88078	356.507	10.8134	14	1346
30	9.4167	356.88	10.9993	14	1396
31	9.2145	356.843	11.1399	14	1446
32	7.15662	356.063	10.7508	14	1495
33	7.6092	356.595	10.7756	14	1544
34	8.32882	357.087	10.9812	14	1597
35	7.6329	356.668	10.8546	14	1647
36	7.40515	356.666	11.1276	14	1696
37	6.63056	356.372	11.6981	14	1744
38	6.27007	356.349	11.4741	14	1792
39	5.46764	356.807	11.2826	14	1843
40	4.9781	359.343	11.8486	14	1895
41	4.94154	359.254	11.7911	14	1944
42	4.81514	359.546	11.8152	14	1991
43	4.82034	359.734	11.6699	14	2033
44	4.47211	360.173	11.5724	14	2081
45	4.4847	359.382	11.4686	14	2127
46	3.98751	359.82	11.4892	14	2173
47	4.25154	360.285	11.6169	14	2220
48	4.00626	359.868	11.647	14	2263
49	3.9288	360.003	11.7334	14	2307
50	3.4158	360.132	11.7478	14	2355
51	2.92867	359.797	11.5267	14	2400
52	2.99727	360.059	11.8043	14	2449
53	3.72031	359.012	11.9922	14	2494
54	3.12638	359.529	11.9693	14	2539
55	3.60738	359.363	12.178	14	2583
56	3.8948	359.506	12.1003	14	2631
57	3.32218	360.118	12.012	14	2676
58	3.31619	360.113	12.2283	14	2718
59	2.98873	359.767	12.1995	14	2762
60	0.807999	361.57	12.2718	14	2811
61	2.68781	359.773	12.346	14	2857
62	3.23822	360.115	12.3447	14	2903
63	2.98768	360.185	12.3665	14	2951
64	2.13872	361.236	12.346	14	2994
65	1.00345	361.172	12.1758	14	3040
66	0.91104	361.445	12.1942	14	3082
67	2.90221	359.393	12.6338	14	3122
68	4.36684	359.306	12.9789	14	3166
69	3.10027	359.873	12.7814	14	3206
70	2.95386	360.577	12.7004	14	3249
71	3.0556	360.36	12.9528	14	3289
72	3.28798	360.993	13.0449	14	3331
73	3.86108	360.255	13.2654	14	3370
74	3.84492	360.781	13.4567	14	3409
75	3.64206	361.384	13.4538	14	3450
76	3.82406	361.886	13.4843	14	3488
77	4.16092	361.561	13.6114	14	3525
78	4.26311	362.121	13.6122	14	3565
79	4.31569	362.234	13.6145	14	3604
80	4.7427	361.199	13.7009	14	3645
81	4.72351	361.292	13.7814	14	3684
82	4.27305	363.004	13.6963	14	3726
83	4.96847	361.262	13.9529	14	3766
84	4.20769	362.993	13.8354	14	3806
85	4.06223	362.87	13.635	14	3847
86	4.65758	360.6	13.746	14	3886
87	4.56938	360.842	13.8059	14	3925
88	3.48315	363.557	13.6798	14	3964
89	3.13754	364.86	13.5574	14	4003
90	4.04077	362.208	13.6097	14	4040
91	4.03849	362.215	13.6151	14	4077
92	4.07048	362.159	13.62	14	4115
93	3.21138	363.594	13.6645	14	4152
94	3.63745	362.335	13.8166	14	4187
95	3.72203	362.36	13.7137	14	4222
96	3.31689	364.286	13.7298	14	4258
97	2.69493	364.501	13.6505	14	4294
98	2.61444	364.567	13.852	14	4328
99	2.87463	363.803	14.0718	14	4362
100	3.21216	362.929	14.1067	14	4394
101	3.4711	362.067	14.2481	14	4426
102	3.75571	361.737	14.1129	14	4458
103	2.86444	363.571	14.1066	14	4493
104	3.25139	363.134	14.2802	14	4539
105	3.26399	363.018	14.617	14	4572
106	3.72565	360.931	14.4392	14	4607
1	78.5149	427.131	5.5	15	14
2	78.0044	426.556	5.5	15	50
3	78.5335	427.173	5.5	15	88
4	79.885	426.911	5.5	15	128
5	81.5625	426.574	5.5	15	167
6	80.593	426.68	5.5	15	210
7	80.3849	426.545	5.5	15	253
8	79.5768	426.883	5.5	15	294
9	79.894	426.641	5.5	15	337
10	80.184	426.413	5.5	15	383
11	79.5843	426.872	5.5	15	428
12	78.957	426.952	7.37078	15	478
13	79.5317	426.476	5.5	15	527
14	78.3175	426.762	6.96371	15	577
15	77.6515	426.842	7.02096	15	627
16	78.2592	425.919	7.25224	15	677
17	78.475	426.11	7.52744	15	728
18	78.6361	425.658	7.0965	15	777
19	74.3386	422.403	7.56753	15	829
20	62.5631	414.428	8.2392	15	880
21	63.972	415.757	8.70821	15	933
22	48.9573	392.406	5.5	15	984
23	48.437	390.976	5.5	15	1037
24	47.9033	388.668	5.5	15	1087
25	49.5535	380.587	5.5	15	1138
26	33.5686	374.513	8.26689	15	1190
27	29.6608	367.307	9.95459	15	1242
28	27.7288	363.585	8.94295	15	1293
29	26.7897	362.812	8.38021	15	1344
30	27.515	363.552	8.86956	15	1394
31	27.6862	363.717	8.69637	15	1443
32	25.9215	362.399	8.1786	15	1490
33	26.8472	363.387	8.45155	15	1540
34	25.1603	361.947	8.39433	15	1593
35	29.0891	365.67	9.70892	15	1649
36	26.8701	363.66	9.0327	15	1693
37	26.8945	363.403	9.54748	15	1746
38	27.378	364.267	9.84587	15	1794
39	19.2021	359.914	10.0378	15	1844
1	157.832	449.279	8.09499	16	15
2	156.667	449.33	8.92153	16	52
3	156.045	449.218	8.79974	16	90
4	155.947	448.596	9.04026	16	130
5	156.004	448.558	9.14005	16	170
6	154.729	448.514	9.3006	16	213
7	156.457	448.534	8.84243	16	254
8	155.95	448.624	8.91707	16	296
9	156.163	448.653	9.24223	16	338
10	155.925	448.204	9.49528	16	388
11	155.948	447.874	9.65855	16	433
12	153.469	448.106	10.31	16	481
13	150.089	448.032	10.2292	16	531
14	155.62	448.381	9.90356	16	580
15	155.341	447.908	9.97027	16	630
16	155.463	447.951	9.90915	16	681
17	156.008	447.814	10.0539	16	731
18	156.297	447.823	9.84348	16	782
19	156.486	447.803	10.0117	16	834
20	156.516	447.863	10.0405	16	884
21	156.131	447.833	10.1625	16	937
22	156.055	447.937	10.3242	16	989
23	156.397	447.87	10.3861	16	1042
24	157.012	448.225	10.2466	16	1091
25	156.667	447.778	10.3943	16	1143
26	156.989	447.676	10.586	16	1195
27	156.757	447.862	10.3066	16	1243
28	156.326	447.743	10.5776	16	1297
29	156.42	447.994	10.682	16	1348
30	156.756	448.018	10.9406	16	1398
31	157.061	448.144	10.8867	16	1448
32	155.865	448.518	10.8504	16	1496
33	150.679	448.73	12.4538	16	1548
34	148.757	449.22	13.2076	16	1601
35	149.166	449.552	13.1947	16	1653
36	148.612	449.224	13.0754	16	1700
37	146.196	447.583	13.7338	16	1751
38	145.658	447.806	13.8567	16	1799
39	146.009	448.233	13.5185	16	1848
40	146.774	448.352	13.9731	16	1896
41	146.29	448.494	14.0468	16	1945
42	146.578	448.793	13.9993	16	1992
43	146.554	448.506	13.8862	16	2040
44	145.819	448.363	13.7247	16	2087
45	145.154	448.464	13.3851	16	2132
46	149.78	449.599	13.7262	16	2178
47	150.047	449.647	13.8701	16	2225
48	145.416	447.675	14.2881	16	2284
49	146.262	448.336	13.9662	16	2313
50	144.787	447.636	13.9545	16	2360
51	144.947	447.682	13.9972	16	2406
52	145.594	447.782	14.1057	16	2450
53	145.108	447.773	13.8168	16	2495
54	148.023	448.512	14.2313	16	2540
55	146.441	447.678	14.4729	16	2598
56	144.005	447.015	14.4192	16	2643
57	142.87	446.703	14.9645	16	2690
58	156.648	449.182	13.0628	16	2720
59	156.139	448.541	12.8611	16	2764
60	144	446.128	15.4901	16	2827
61	144.164	446.744	14.9144	16	2874
62	146.498	447.241	14.3683	16	2921
63	143.106	446.507	15.1909	16	2967
64	144.885	446.662	14.8572	16	3012
65	145.401	446.993	14.9792	16	3057
66	156.442	449.01	12.8016	16	3083
67	152.008	448.551	13.7631	16	3124
68	156.563	448.305	13.393	16	3168
69	156.268	448.345	13.4171	16	3208
70	150.431	448.499	15.2477	16	3266
71	154.621	448.834	13.929	16	3291
72	153.964	449.044	14.5088	16	3347
73	147.065	448.344	15.9945	16	3386
74	154.472	449.545	14.885	16	3426
75	148.182	449.604	16.0852	16	3465
76	146.216	448.859	15.8694	16	3505
77	146.775	448.579	15.8293	16	3544
78	146.582	448.786	15.9794	16	3584
79	147.082	448.978	16.2546	16	3623
80	147.239	449.095	16.3121	16	3663
81	158.093	450.621	14.7531	16	3704
82	153.812	450.6	15.575	16	3746
83	156.346	450.203	15.3195	16	3786
84	157.614	450.174	14.8585	16	3827
85	158.152	449.81	14.7719	16	3868
86	158.216	449.747	14.7642	16	3907
87	158.731	449.694	14.607	16	3944
88	158.48	449.619	14.5703	16	3980
89	157.355	449.955	14.7147	16	4018
90	157.735	449.384	14.5639	16	4054
91	157.493	449.348	14.6462	16	4093
92	158.604	449.391	14.4576	16	4131
93	158.122	449.417	14.5421	16	4169
94	158.017	449.433	14.7267	16	4205
95	158.053	449.4	14.4806	16	4240
96	158.115	449.215	14.4382	16	4275
97	157.642	449.305	14.3953	16	4311
98	157.992	449.539	14.5883	16	4342
99	157.983	449.207	14.8366	16	4378
100	157.29	449.311	14.8395	16	4410
101	158.512	449.338	14.6452	16	4444
102	157.346	449.14	14.8954	16	4477
103	156.741	448.082	15.5604	16	4509
105	155.599	448.001	16.2056	16	4573
106	155.07	448.718	16.4758	16	4608
1	29.8272	259.254	9.5237	17	16
2	29.6093	259.007	9.0224	17	51
3	29.4732	258.756	9.03991	17	89
4	29.2595	258.771	8.91301	17	129
5	29.2983	258.745	8.82858	17	168
6	29.2196	258.676	8.99409	17	211
7	29.4474	259.058	9.74075	17	255
8	29.402	259.058	9.85412	17	297
9	29.302	258.919	9.67358	17	339
10	29.6269	258.644	9.62465	17	386
11	29.8531	258.913	10.0575	17	430
12	29.8055	258.592	9.9812	17	479
13	29.4959	258.363	9.75686	17	529
14	28.9688	258.414	10.4085	17	578
15	29.2055	258.197	10.0812	17	628
16	29.3878	258.371	10.1363	17	678
17	29.1829	258.197	10.263	17	729
18	29.0889	257.973	10.2009	17	778
19	29.3169	258.128	10.2836	17	830
20	29.2633	258.19	10.636	17	881
21	29.2786	257.926	10.5158	17	934
22	28.9658	257.878	10.6097	17	986
23	29.0265	257.686	10.5976	17	1039
24	29.0763	257.53	10.4584	17	1089
25	29.0352	257.689	10.5243	17	1141
26	28.8009	257.56	10.5158	17	1192
27	28.7378	257.401	10.7376	17	1240
28	28.823	257.528	10.9699	17	1295
29	29.0513	257.469	10.9123	17	1345
30	29.7864	257.75	11.4641	17	1395
31	29.7834	258.364	11.2552	17	1445
32	29.4	258.542	11.0631	17	1493
33	29.4125	258.718	11.2795	17	1542
34	29.2241	258.835	11.511	17	1594
35	29.4471	259.104	11.994	17	1650
36	29.5739	259.111	11.551	17	1694
37	29.7682	259.349	12.1492	17	1747
38	30.1924	259.334	11.8869	17	1795
39	30.0071	259.211	11.4122	17	1840
40	30.4968	259.783	12.1722	17	1892
41	30.569	260.068	12.6121	17	1941
42	30.5687	260.091	12.8052	17	1988
43	30.5903	260.186	12.6803	17	2035
44	30.6235	260.189	12.3065	17	2083
45	30.5589	260.203	12.2801	17	2129
46	30.6585	260.319	12.4638	17	2175
47	30.3502	260.062	12.3603	17	2222
48	30.2267	259.916	12.3535	17	2265
49	30.2052	260.005	12.6393	17	2309
50	30.2076	260.052	12.5568	17	2357
51	30.2754	259.774	12.3496	17	2402
52	30.3091	259.829	12.4401	17	2446
53	30.3644	259.735	12.6121	17	2490
54	30.1152	259.326	12.6876	17	2535
55	30.1998	259.292	12.8892	17	2579
56	30.2346	259.246	13.0099	17	2626
57	30.3239	259.214	13.1276	17	2672
58	30.4258	259.435	13.1245	17	2714
59	30.4688	259.189	13.1007	17	2759
60	30.1986	259.14	12.9192	17	2807
61	30.2698	259.004	13.0087	17	2855
62	30.2113	258.98	13.3487	17	2901
63	30.1728	258.956	13.2585	17	2948
64	30.311	259.152	13.1389	17	2992
65	30.1953	259.049	12.9121	17	3037
66	30.1748	259.231	13.2487	17	3081
67	29.9788	258.961	13.4911	17	3121
68	29.9941	258.897	13.4105	17	3164
69	29.8328	258.659	13.367	17	3204
70	30.3009	259.011	13.7701	17	3246
71	30.4616	259.249	13.6926	17	3287
72	30.3555	259.018	13.6903	17	3329
73	30.3436	259.029	13.7756	17	3368
74	30.7553	259.388	13.9451	17	3407
75	30.5249	259.599	14.2489	17	3447
76	30.4968	259.757	14.005	17	3486
77	30.7101	260.421	14.4679	17	3539
78	31.0226	260.839	14.743	17	3580
79	31.2395	260.966	15.047	17	3618
80	31.5686	260.977	14.6973	17	3660
81	31.4853	261.027	14.7609	17	3701
82	31.3573	260.955	15.059	17	3743
83	31.2125	260.828	14.8819	17	3783
84	31.1337	260.728	15.0232	17	3824
85	31.5513	261.046	15.1742	17	3864
86	31.5263	261.02	14.9126	17	3904
87	31.351	260.631	14.8423	17	3941
88	31.2652	260.464	14.7426	17	3978
89	30.8507	260.382	14.5654	17	4015
90	31.0849	260.33	15.1224	17	4051
91	30.9178	260.157	14.8779	17	4089
92	30.9637	260.189	14.7556	17	4128
93	31.2362	260.137	15.0068	17	4166
94	31.0541	260.001	14.7415	17	4201
95	30.8524	259.837	14.7465	17	4236
96	30.9298	259.821	15.0371	17	4272
97	31.0136	259.86	15.22	17	4308
98	31.2399	259.908	15.2451	17	4339
99	31.2954	259.775	15.2738	17	4375
100	31.2424	259.946	15.4908	17	4408
101	31.2173	259.87	15.1801	17	4440
102	30.981	259.467	15.147	17	4473
103	30.9382	259.618	15.3835	17	4506
104	30.7075	259.551	15.6196	17	4535
105	31.0804	259.524	15.8197	17	4568
1	243.129	342.786	10.8358	18	17
2	243.956	342.908	10.8594	18	53
3	243.549	342.643	10.6905	18	91
4	242.898	342.387	10.4963	18	131
5	242.601	342.569	10.7221	18	171
6	242.634	342.724	10.7981	18	212
7	243.103	342.525	10.617	18	256
8	243.362	342.345	10.7337	18	298
9	243.596	342.198	10.7718	18	340
10	242.929	342.293	10.8194	18	387
11	242.445	342.266	11.0932	18	432
12	242.027	342.191	10.7993	18	480
13	242.207	342.235	11.1372	18	530
14	242.749	342.218	11.4819	18	579
15	243.066	342.14	11.3209	18	629
16	243.449	342.237	11.6205	18	680
17	242.74	341.899	11.3764	18	730
18	241.973	341.79	11.3922	18	780
19	241.702	342.044	11.5725	18	832
20	241.782	342.088	11.7526	18	886
21	242.392	341.687	11.7619	18	939
22	243.115	341.889	11.87	18	992
23	243.055	341.736	12.3036	18	1045
24	242.86	341.781	12.0268	18	1094
25	242.369	341.453	12.0977	18	1146
26	241.748	341.679	12.1215	18	1198
27	241.911	341.705	12.2359	18	1247
28	242.371	341.852	12.4952	18	1300
29	243.158	341.81	12.5845	18	1352
30	243.513	341.849	12.9439	18	1401
31	243.243	342.233	12.8591	18	1450
32	242.615	342.358	12.5127	18	1498
33	242.454	342.632	12.7693	18	1547
34	242.7	342.752	13.0851	18	1600
35	243.035	343.123	13.3175	18	1651
36	243.916	343.273	13.4202	18	1698
37	244.264	343.511	13.6967	18	1749
38	243.677	343.186	13.4301	18	1797
39	243.451	343.587	13.4373	18	1846
40	242.571	341.743	20.5312	18	1914
41	242.729	345.517	18.3416	18	1961
42	245.168	350.511	17.7172	18	2008
43	244.616	343.953	13.784	18	2038
44	244.941	343.927	13.8099	18	2085
45	244.315	343.666	13.7467	18	2130
46	243.621	343.574	13.7101	18	2176
47	243.527	343.669	13.6181	18	2223
48	243.66	343.748	13.8485	18	2267
49	244.346	343.849	13.9171	18	2311
50	244.645	343.578	13.7176	18	2358
51	244.266	343.383	13.5222	18	2404
52	244.04	343.337	14.0891	18	2447
53	243.415	343.333	13.9677	18	2492
54	243.366	343.227	13.9634	18	2537
55	243.389	343.11	14.3361	18	2596
56	244.433	343.305	14.0991	18	2629
57	244.506	343.08	14.4278	18	2688
58	244.625	342.953	14.6769	18	2733
59	244.594	342.802	14.5806	18	2779
60	243.714	342.888	14.3104	18	2825
61	243.551	342.835	14.6418	18	2871
62	244.021	342.733	14.5235	18	2918
63	244.272	342.779	14.5437	18	2965
64	244.628	342.999	14.8246	18	3009
65	243.466	342.595	14.1982	18	3038
66	243.821	342.943	14.8714	18	3097
67	243.057	342.97	14.9563	18	3138
68	243.176	342.585	14.8122	18	3181
69	243.68	342.832	15.1622	18	3223
70	244.94	343.033	15.209	18	3264
71	245.031	343.242	15.4223	18	3307
72	244.953	343.384	15.3625	18	3345
73	243.905	343.332	15.7736	18	3384
74	244.011	343.521	15.6011	18	3424
75	244.051	343.817	15.7287	18	3463
76	244.539	344.065	15.8557	18	3503
77	245.501	344.548	15.8349	18	3542
78	245.797	344.528	15.6996	18	3582
79	245.747	344.412	15.812	18	3621
80	245.202	344.515	15.9954	18	3661
81	244.612	344.521	15.751	18	3702
82	245.13	344.772	16.3666	18	3744
83	245.343	344.544	16.0969	18	3784
84	245.978	344.486	16.1573	18	3825
85	245.483	344.265	16.2068	18	3866
1	118.53	368.214	12.8829	19	18
2	119.391	368.5	12.9741	19	54
3	119.168	368.651	13.162	19	92
4	118.326	368.078	12.9544	19	132
5	117.135	367.468	12.9263	19	172
6	116.489	367.169	12.9456	19	214
7	117.564	367.352	13.2825	19	257
8	117.944	367.519	12.963	19	299
9	118.411	367.936	13.1144	19	343
10	118.34	367.727	12.9491	19	390
11	118.67	367.563	12.9058	19	435
12	117.127	367.011	13.0697	19	484
13	117.144	366.897	13.2198	19	534
14	117.223	367.119	13.465	19	583
15	117.684	367.149	13.3402	19	632
16	117.848	367.445	13.2643	19	682
17	117.276	367.15	13.2893	19	733
18	116.009	366.401	13.382	19	783
19	115.834	366.415	13.5633	19	836
20	116.325	366.412	13.9103	19	887
21	117.643	366.795	13.9878	19	940
22	118.142	367.255	13.8415	19	993
23	119.178	367.42	13.7663	19	1046
24	118.69	366.86	13.5294	19	1095
25	119.666	366.355	13.394	19	1147
26	117.996	366.538	14.1331	19	1199
27	117.346	366.66	14.587	19	1261
28	118.342	366.503	14.5103	19	1316
29	118.284	367.165	14.587	19	1366
30	119.368	367.694	14.7646	19	1415
32	79.6059	374.444	17.1348	19	1516
33	74.4966	376.06	16.6147	19	1567
34	73.1428	377.054	17.3831	19	1621
35	71.4123	377.213	17.7541	19	1671
36	71.5883	378.016	17.8034	19	1722
37	72.1411	377.998	18.2765	19	1770
38	71.5552	378.375	18.6551	19	1817
39	71.5143	379.4	18.3467	19	1865
40	70.8847	378.227	18.2845	19	1912
41	70.8548	378.394	18.5215	19	1962
42	69.7767	377.187	18.462	19	2009
43	70.8042	378.766	19.2549	19	2056
44	69.8739	377.583	18.5815	19	2103
45	59.6912	376.112	19.6117	19	2149
46	59.4663	376.265	19.2999	19	2195
47	59.1502	375.072	18.5147	19	2242
48	58.3875	374.571	18.9544	19	2285
49	57.7756	374.204	19.9403	19	2331
50	58.9555	375.837	19.0949	19	2376
51	58.0153	375.109	19.8491	19	2422
52	59.048	375.659	19.4515	19	2467
53	59.4818	376.057	19.4602	19	2511
54	58.9198	374.232	18.9943	19	2556
55	59.5273	374.454	19.447	19	2599
56	58.5231	373.99	19.9843	19	2645
57	58.9668	374.811	20.1499	19	2692
58	59.4761	375.759	19.6421	19	2736
59	59.0443	375.355	20.0897	19	2783
60	59.3758	375.637	20.2033	19	2829
61	59.0198	375.054	19.9204	19	2876
62	58.0701	373.597	19.7853	19	2923
63	58.1978	373.615	19.9107	19	2969
64	58.4327	374.459	20.3481	19	3014
65	58.0987	375.141	20.2816	19	3059
66	58.7842	374.958	20.6127	19	3101
67	59.2692	375.094	20.5175	19	3142
68	59.4294	374.107	20.3136	19	3186
69	59.2169	373.857	20.6598	19	3228
70	59.8239	373.93	20.918	19	3270
71	59.3025	374.737	20.9921	19	3312
72	59.085	375.128	21.38	19	3352
73	59.8414	375.77	21.1183	19	3389
74	60.8186	375.891	21.3617	19	3429
75	59.5173	375.321	21.6641	19	3468
76	59.9083	374.99	21.5814	19	3508
77	59.9691	375.519	21.8538	19	3548
78	60.2888	376.7	21.2294	19	3587
79	59.8752	376.018	22.3364	19	3629
80	60.2826	376.645	22.3671	19	3668
81	60.7366	377.125	21.82	19	3709
82	59.9395	375.427	21.5945	19	3750
83	59.8444	375.657	22.0494	19	3791
84	59.5872	375.348	22.4807	19	3832
85	60.0971	375.764	22.9123	19	3872
86	60.8051	376.424	23.0826	19	3911
87	60.5043	377.145	22.3863	19	3949
88	60.6201	376.849	23.2483	19	3987
89	60.1994	375.01	21.544	19	4024
90	60.791	375.51	22.0677	19	4059
91	59.7656	374.961	22.1363	19	4098
92	60.7538	376.022	21.325	19	4136
93	60.2422	375.742	22.4875	19	4174
94	60.5623	376.5	23.1009	19	4210
95	60.273	376.27	23.05	19	4245
96	59.4866	374.788	23.0131	19	4281
97	57.8302	374.879	23.2517	19	4317
98	58.1056	374.478	25.5	19	4357
99	58.1541	374.067	25.5	19	4390
100	60.4893	375.389	23.7661	19	4416
101	60.7615	375.763	23.4543	19	4449
102	60.1608	374.698	22.5558	19	4482
103	61.228	375.132	22.3797	19	4514
104	61.0528	374.489	23.5426	19	4544
105	59.5793	374.367	23.7771	19	4578
106	60.1992	375.698	21.3095	19	4613
1	323.719	327.655	5.5	20	19
2	324.091	327.4	5.5	20	56
3	323.846	326.823	5.5	20	93
4	324.3	326.048	5.5	20	133
5	324.089	326.841	5.5	20	173
6	324.01	326.697	5.5	20	215
7	324.138	326.582	5.5	20	258
8	324.249	326.115	5.5	20	301
9	324.135	326.195	5.5	20	344
10	323.903	325.991	5.5	20	391
11	324.882	325.222	5.5	20	436
12	326.817	322.57	5.5	20	485
13	327.01	322.392	5.5	20	535
14	327.852	321.221	5.5	20	584
15	327.774	320.954	5.5	20	634
16	328.236	320.281	5.5	20	683
17	328.66	319.329	5.5	20	734
18	328.259	319.778	5.5	20	784
19	325.177	324.196	5.5	20	837
20	323.407	326.251	5.5	20	888
21	323.596	325.893	5.5	20	942
22	323.848	325.535	5.5	20	994
23	323.971	325.534	5.5	20	1047
24	323.894	325.208	5.5	20	1097
25	323.946	325.533	5.5	20	1148
26	323.669	325.718	5.5	20	1200
27	323.629	325.726	5.5	20	1248
28	323.835	325.854	5.5	20	1301
29	323.702	325.937	5.5	20	1353
30	323.951	325.435	5.5	20	1402
31	324.48	325.53	5.5	20	1451
32	324.171	326.101	5.5	20	1499
33	324.055	326.555	5.5	20	1549
34	324.374	326.881	5.5	20	1603
35	324.813	326.814	5.5	20	1654
36	324.754	326.951	5.5	20	1701
37	325.033	327.193	5.5	20	1752
38	325.328	326.435	5.5	20	1800
39	325.814	326.591	5.5	20	1849
40	325.575	327.42	5.5	20	1897
41	325.655	327.588	5.5	20	1946
42	325.566	328.115	5.5	20	1993
43	325.935	327.381	5.5	20	2041
44	325.902	327.454	5.5	20	2088
45	326.083	327.476	5.5	20	2133
46	325.566	327.812	5.5	20	2179
47	325.296	328.588	5.5	20	2226
48	325.54	327.815	5.5	20	2269
49	325.296	327.945	5.5	20	2314
50	324.817	328.216	5.5	20	2361
51	325.078	327.979	5.5	20	2407
52	325.061	327.613	5.5	20	2451
53	325.121	327.54	5.5	20	2496
54	325.246	327.65	5.5	20	2541
55	325.208	327.211	6.8286	20	2584
56	325.118	327.156	5.5	20	2632
57	325.125	327.126	6.94054	20	2677
58	325.15	326.965	6.97468	20	2721
59	325.214	326.946	5.5	20	2765
60	325.047	327.171	7.20214	20	2812
61	325.327	326.887	5.5	20	2858
62	325.206	326.954	7.35385	20	2904
63	326.565	324.604	7.57243	20	2952
64	326.106	325.16	7.625	20	2995
65	329.33	321.065	5.5	20	3041
66	324.856	327.17	7.2787	20	3085
67	325.072	326.993	7.69389	20	3126
68	326.093	325.352	7.7965	20	3169
69	325.851	326.054	8.25564	20	3209
70	326.766	324.967	7.92233	20	3250
71	326.705	325.458	8.4452	20	3292
72	326.469	326.148	8.7067	20	3333
73	326.059	327.037	8.6899	20	3372
74	326.38	326.697	9.22507	20	3411
75	326.578	327.081	9.15783	20	3451
76	326.124	328.105	9.51123	20	3491
77	326.36	327.962	9.33183	20	3528
78	325.889	328.365	9.44724	20	3568
79	326.216	328.851	9.62273	20	3607
80	326.085	329.085	9.89808	20	3648
81	326.076	329.065	9.77578	20	3687
82	326.473	328.764	9.78362	20	3727
83	326.389	328.686	9.97397	20	3768
84	326.478	328.607	9.98371	20	3808
85	326.576	328.128	9.86898	20	3849
86	326.575	328.414	9.93024	20	3888
87	326.44	328.739	9.84346	20	3928
88	326.439	328.183	9.72221	20	3966
89	326.292	328.696	9.69827	20	4005
90	326.219	328.555	9.53765	20	4043
91	325.929	328.269	9.59797	20	4080
92	326.118	328.287	9.75773	20	4118
93	326.27	327.857	9.69317	20	4153
94	325.988	328.44	9.85506	20	4189
95	326.041	328.534	9.63903	20	4223
96	326.458	327.7	9.95882	20	4259
97	326.265	327.616	10.0099	20	4295
98	326.213	327.809	10.1248	20	4329
99	326.609	327.14	10.1927	20	4363
100	326.835	326.557	10.3676	20	4395
101	326.683	326.637	10.2863	20	4427
102	326.463	327.108	10.2875	20	4460
103	326.008	327.692	10.4989	20	4494
104	326.326	326.977	10.7127	20	4525
105	326.541	326.869	10.3666	20	4557
106	326.461	326.925	10.62	20	4590
1	279.068	365.631	5.5	21	20
2	278.636	365.724	5.5	21	57
3	278.921	365.47	5.5	21	95
4	278.986	365.383	5.5	21	135
5	278.154	366.505	5.5	21	175
6	278.563	366.74	5.5	21	217
7	278.272	366.83	5.5	21	260
8	277.815	366.55	5.5	21	303
9	277.686	367.864	5.5	21	346
10	276.84	387.224	5.5	21	393
11	273.287	398.499	5.5	21	438
12	273.896	399.035	5.5	21	487
13	273.95	400.085	5.5	21	536
14	275.491	424.672	5.5	21	586
15	275.955	425.325	5.5	21	636
16	286.272	440.162	7.0005	21	685
17	296.111	464.478	13.3173	21	739
18	297.97	464.763	12.8993	21	790
19	298.015	464.77	13.0992	21	842
20	299.009	464.898	13.139	21	894
21	298.217	464.814	13.5187	21	948
22	297.36	464.622	13.5089	21	999
23	295.942	464.091	14.6507	21	1067
24	296.643	464.291	13.9958	21	1103
25	297.128	463.876	13.5114	21	1154
26	297.959	464.175	13.8973	21	1207
27	297.897	464.838	14.8598	21	1266
28	298.517	464.364	14.1846	21	1307
29	297.572	465.241	15.4233	21	1370
30	296.967	465.411	15.3832	21	1421
31	297.233	465.191	14.1129	21	1457
32	298.672	465.744	13.9854	21	1505
33	298.647	466.299	15.04	21	1572
34	299.696	466.845	14.7841	21	1625
35	299.609	466.632	14.803	21	1674
36	297.298	466.268	14.6748	21	1726
37	298.476	466.342	14.7234	21	1774
38	297.875	465.855	15.1637	21	1823
39	298.18	466.368	14.9537	21	1871
40	299.703	466.344	15.247	21	1920
41	300.547	466.631	15.777	21	1964
42	300.543	466.609	15.3015	21	2012
43	299.61	466.666	15.4416	21	2059
44	299.102	466.323	15.4107	21	2107
45	298.621	466.928	15.6061	21	2153
46	298.982	466.553	15.6134	21	2200
47	299.901	466.37	15.3633	21	2246
48	300.214	466.445	15.4406	21	2289
49	299.939	466.539	15.8473	21	2336
50	298.117	466.117	15.6324	21	2380
51	298.17	466.318	15.6403	21	2426
52	298.082	465.715	15.6614	21	2470
53	298.854	465.85	15.5741	21	2515
54	300.185	466.112	15.521	21	2559
55	300.279	466.096	16.0963	21	2602
56	300.119	465.929	16.14	21	2646
57	298.789	465.475	15.7996	21	2695
58	298.456	465.509	16.0117	21	2740
59	298.508	465.363	15.9437	21	2786
60	299.151	465.526	16.1465	21	2834
61	299.7	465.732	15.9267	21	2880
62	299.421	465.543	15.8815	21	2925
63	299.639	465.794	16.3035	21	2970
64	298.671	465.343	15.9638	21	3016
65	298.418	465.864	16.129	21	3062
66	298.516	465.719	16.2761	21	3104
67	299.287	465.45	16.4856	21	3146
68	299.469	465.094	17.1989	21	3189
69	300.586	466.486	17.0388	21	3231
70	300.38	466.362	17.1011	21	3273
71	298.978	466.219	16.674	21	3314
72	298.86	465.748	17.5168	21	3356
73	299.39	466.295	17.7371	21	3396
74	299.751	466.753	17.6697	21	3436
75	300.401	466.969	17.7199	21	3477
76	301.182	467.236	17.8806	21	3514
77	299.891	467.188	17.9135	21	3552
78	299.498	467.037	17.6156	21	3590
79	299.481	467.288	18.1504	21	3631
80	299.358	467.463	18.1735	21	3671
81	300.545	467.801	17.9065	21	3712
82	301.642	467.9	18.4022	21	3754
83	301.459	467.882	18.5142	21	3794
84	300.918	467.683	18.7332	21	3835
85	300.387	467.332	18.1536	21	3875
86	299.247	466.393	17.8503	21	3914
87	300.401	466.818	18.2559	21	3952
88	301.094	468.222	17.8868	21	3990
89	301.34	467.45	17.974	21	4025
90	301.513	467.251	17.8656	21	4061
91	300.569	467.17	18.0131	21	4099
92	299.907	466.748	18.1781	21	4139
93	299.237	466.877	18.0675	21	4177
94	299.617	466.505	18.1562	21	4213
95	300.341	466.514	18.1313	21	4248
96	300.893	467.188	18.5083	21	4283
97	300.924	466.791	18.4858	21	4320
98	300.292	466.784	18.7339	21	4351
99	299.168	466.458	18.5049	21	4384
100	299.103	465.894	18.2255	21	4417
101	299.371	466.028	18.3531	21	4452
102	300.31	466.057	19.4353	21	4485
103	301.342	466.15	18.7082	21	4516
104	300.861	466.597	18.8756	21	4546
105	299.992	466.387	18.3778	21	4580
106	299.14	466.631	18.3051	21	4616
1	293.459	492.281	5.5	22	21
2	291.34	493.769	5.5	22	58
3	291.117	492.985	5.5	22	96
4	290.621	492.071	5.5	22	136
5	290.88	491.538	5.5	22	176
6	291.041	491.868	5.5	22	218
7	290.837	493.587	5.5	22	261
8	292.495	493.396	5.5	22	304
9	296.874	491.987	5.5	22	347
10	295.987	490.893	5.5	22	394
11	292.879	492.97	5.5	22	439
12	290.5	494.21	5.5	22	488
13	290.116	493.975	5.5	22	538
14	297.478	491.558	9.38187	22	590
15	296.336	490.594	8.21147	22	638
16	281.466	455.221	14.4861	22	701
17	288.735	462.253	16.0699	22	751
18	287.319	462.182	16.5432	22	804
19	287.94	462.245	16.0452	22	856
20	287.928	462.833	16.7989	22	909
21	289.876	462.542	16.2505	22	961
1	488.228	398.23	11.2961	23	22
2	488.805	402.94	10.5421	23	59
3	488.85	401.601	11.0238	23	97
4	488.653	401.983	10.8685	23	137
5	488.577	402.458	10.4892	23	177
6	488.65	404.575	10.0734	23	219
7	488.509	404.72	10.4317	23	262
8	488.976	404.247	10.1473	23	305
9	488.454	403.612	10.3822	23	348
10	488.513	404.037	10.6697	23	395
11	488.222	403.557	10.8424	23	440
12	488.288	402.895	10.9452	23	489
13	488.409	402.091	11.2872	23	539
14	488.544	404.706	10.7983	23	587
15	487.328	406.284	10.7834	23	639
16	485.259	410.905	11.1401	23	686
17	472.015	410.78	8.79147	23	736
18	456.168	450.925	6.84901	23	786
19	455.988	449.535	5.5	23	838
20	451.376	449.789	5.5	23	889
21	449.798	450.004	5.5	23	943
22	450.167	449.971	5.5	23	995
23	450.589	449.337	5.5	23	1048
24	451.283	449.625	5.5	23	1098
25	451.533	449.657	5.5	23	1149
26	449.267	458.819	9.97095	23	1205
27	445.962	467.022	8.05939	23	1250
28	446.062	467.059	8.14802	23	1303
29	445.393	479.378	10.0684	23	1356
30	444.114	480.722	10.2025	23	1404
31	444.1	481.34	10.1609	23	1455
32	445.261	481.532	10.1124	23	1503
33	443.834	481.931	10.2158	23	1553
34	438.759	481.637	13.1241	23	1607
35	437.313	484.374	13.6227	23	1658
36	436.891	485.147	13.368	23	1705
37	437.128	485.747	13.9008	23	1757
38	436.983	486.912	14.0467	23	1805
39	436.089	490.193	13.8939	23	1854
40	434.938	491.297	13.7562	23	1902
41	434.541	491.848	13.7524	23	1950
42	433.839	491.852	13.8355	23	1997
43	433.957	491.731	13.9043	23	2045
44	433.186	491.968	13.8014	23	2092
45	431.22	492.51	13.8271	23	2137
46	426.655	493.566	14.2683	23	2201
47	426.503	493.47	14.1764	23	2230
48	426.149	493.786	14.4648	23	2290
49	426.124	493.735	14.7308	23	2337
50	427.133	492.968	14.4364	23	2382
51	426.446	493.117	14.5526	23	2427
52	426.215	493.648	14.9026	23	2471
53	424.827	496.4	15.3489	23	2516
54	422.805	502.098	16.1726	23	2560
55	422.941	501.837	16.3306	23	2603
56	429.624	507.934	16.1845	23	2647
57	429.553	507.934	16.254	23	2696
58	430.041	507.934	15.7128	23	2741
59	430.777	507.934	15.9921	23	2787
61	400.86	507.934	13.2343	23	2863
62	402.02	507.934	13.7502	23	2909
63	400.591	507.934	12.8781	23	2957
64	400.94	507.934	13.105	23	3000
65	400.438	507.934	11.6317	23	3046
1	367.316	417.131	10.8838	24	23
2	369.703	414.599	10.5076	24	60
3	369.569	414.297	10.6364	24	98
4	369.522	414.189	10.9756	24	138
5	370.008	414.126	10.8136	24	178
6	370.49	413.889	10.7171	24	220
7	370.675	413.907	10.6222	24	263
8	370.216	413.814	10.4526	24	306
9	369.62	413.827	10.8353	24	349
10	368.5	414.864	11.1227	24	396
11	369.372	413.902	11.4212	24	441
12	369.811	413.524	11.397	24	490
13	370.448	412.961	11.1199	24	540
14	370.316	413.423	11.143	24	588
15	369.93	413.034	11.1217	24	640
16	369.466	413.283	11.5232	24	687
17	369.496	412.997	11.9004	24	737
18	368.758	413.69	11.7995	24	787
19	369.192	413.656	11.8967	24	841
20	369.736	413.161	11.3842	24	891
21	369.982	412.797	11.6024	24	945
22	369.949	412.68	11.5971	24	997
23	369.631	412.785	12.2345	24	1051
24	368.778	413.154	12.1842	24	1102
25	368.739	413.267	12.2095	24	1153
26	368.936	413.621	12.2378	24	1206
27	369.508	413.074	12.1756	24	1253
28	369.526	413.27	11.8082	24	1306
29	369.252	414.471	12.6537	24	1358
30	369.802	417.454	15.1927	24	1419
31	371.524	418.968	16.3491	24	1470
32	367.814	416.849	14.8119	24	1519
33	371.164	418.506	18.0804	24	1573
34	369.082	417.239	15.0388	24	1623
36	369.057	416.896	14.915	24	1724
38	369.625	417.662	15.0249	24	1820
39	369.924	417.054	15.6047	24	1868
40	369.776	417.271	15.1405	24	1918
41	371.79	418.673	17.0157	24	1967
42	371.124	417.359	16.364	24	2011
43	373.928	421.259	18.3694	24	2060
44	370.612	417.11	15.7849	24	2105
45	372.248	419.725	17.076	24	2151
46	370.393	416.628	15.6709	24	2197
47	370.703	417.313	15.5741	24	2243
48	370.408	416.858	15.9939	24	2286
49	372.395	419.36	16.6087	24	2333
50	372.617	419.865	16.9223	24	2377
51	370.403	415.945	15.0315	24	2424
52	370.483	416.461	15.4271	24	2468
53	370.593	415.634	15.738	24	2513
54	370.953	416.797	16.9611	24	2561
55	371.209	417.061	17.2443	24	2604
56	372.232	418.002	18.4765	24	2649
57	374.54	421.337	18.0762	24	2697
58	371.728	417.392	16.7678	24	2738
59	370.867	415.582	15.8429	24	2785
60	370.86	415.154	15.9667	24	2833
61	371.027	415.552	15.737	24	2879
62	373.362	419.628	19.2882	24	2928
63	373.589	420.204	18.9269	24	2971
64	372.047	417.345	17.3621	24	3015
65	369.747	416.063	16.3469	24	3061
66	369.952	415.649	16.1671	24	3103
67	370.651	416.061	17.4438	24	3147
68	370.671	415.685	17.3039	24	3187
69	372.069	417.181	18.4892	24	3229
70	373.514	419.628	21.1129	24	3274
71	374.505	421.037	20.3325	24	3316
72	373.741	420.096	23.3011	24	3358
73	371.224	416.488	17.6781	24	3394
74	371.252	416.464	17.6196	24	3434
75	371.672	416.933	18.5744	24	3475
76	372.305	418.696	19.4803	24	3515
77	374.231	421.096	23.4362	24	3553
78	374.749	421.966	20.6949	24	3591
79	373.945	420.664	25.5	24	3641
80	373.09	419.278	19.0713	24	3669
81	371.567	418.546	17.9702	24	3710
82	372.961	419.216	19.7261	24	3756
83	373.072	419.347	19.907	24	3796
84	374.038	420.711	22.5247	24	3836
85	375.087	421.606	20.8393	24	3876
86	372.152	417.253	18.0945	24	3912
87	371.974	417.441	17.7939	24	3950
88	371.851	417.217	18.011	24	3988
89	372.732	418.491	19.5196	24	4026
90	372.664	418.721	19.8935	24	4062
91	373.917	419.981	21.2951	24	4101
92	374.299	420.218	19.208	24	4137
93	373.411	418.462	19.1705	24	4176
94	371.605	416.64	18.2649	24	4212
95	371.846	416.93	17.8872	24	4247
96	373.006	418.814	20.9024	24	4284
97	373.89	419.523	20.6711	24	4321
98	373.992	419.722	19.4029	24	4352
99	374.344	420.826	21.3217	24	4385
100	374.12	420.258	20.7945	24	4418
101	371.572	416.74	18.4244	24	4450
102	372.279	418.459	20.7356	24	4484
103	372.393	417.351	19.5553	24	4517
104	373.425	418.646	23.4698	24	4547
105	373.213	418.464	25.5	24	4588
106	375.079	419.968	20.8462	24	4617
1	263.205	296.777	12.7528	25	24
2	262.228	304.229	13.0387	25	61
3	262.924	306.173	13.3936	25	99
4	268.014	310.713	18.7899	25	147
5	269.484	305.358	22.638	25	191
6	266.627	302.753	21.4456	25	232
7	269.567	304.194	23.2422	25	276
8	270.864	305.049	23.4617	25	320
9	272.324	305.821	22.5406	25	366
10	271.424	304.886	23.3254	25	410
11	267.494	303.127	21.4467	25	455
12	270.225	304.827	23.1614	25	508
13	271.125	306.709	23.4938	25	554
14	272.991	308.289	25.5	25	609
16	264.219	269.204	18.9185	25	702
17	259.894	274.983	18.4967	25	752
18	258.738	280.243	18.284	25	805
19	258.394	281.93	18.5036	25	857
20	257.869	286.676	17.6546	25	908
21	255.617	289.954	17.9526	25	962
22	257.148	286.886	17.5969	25	1015
23	257.237	286.429	17.5929	25	1068
24	257.293	286.429	17.3125	25	1117
25	254.843	288.045	17.6559	25	1169
1	328.672	429.818	13.6679	26	25
2	329.095	430.379	13.3685	26	62
3	328.808	429.766	13.5115	26	100
4	328.485	429.54	13.1963	26	139
5	328.373	429.987	13.2373	26	179
6	328.628	430.374	13.6666	26	221
7	328.415	430.168	13.6258	26	264
8	329.132	429.688	13.4594	26	308
9	328.535	429.961	13.5174	26	350
10	327.884	429.268	13.7292	26	397
11	328.659	428.945	13.419	26	442
12	328.452	429.094	13.9004	26	492
13	328.092	429.734	13.8497	26	541
14	328.628	430.235	14.1793	26	592
15	328.53	430.414	14.5414	26	652
16	328.383	429.63	10.4665	26	688
17	328.716	428.476	13.9705	26	738
18	328.435	428.619	14.1213	26	788
19	328.599	429.013	14.3458	26	855
20	330.603	437.784	14.8324	26	907
21	330.522	435.963	14.7441	26	960
22	328.525	430.166	14.5346	26	1014
23	328.606	429.565	14.5674	26	1066
24	328.262	429.394	15.1341	26	1116
25	328.392	429.187	14.9229	26	1167
26	329.176	431.007	14.8846	26	1218
27	330.54	434.962	15.6384	26	1265
28	331.069	435.15	16.0278	26	1319
29	331.467	435.399	16.0889	26	1369
30	331.36	434.465	15.8387	26	1420
31	328.94	428.994	15.2789	26	1471
32	328.604	430.346	15.4664	26	1520
33	328.587	429.895	15.9169	26	1571
34	328.888	431.053	15.9637	26	1624
35	328.991	430.976	16.0073	26	1673
36	329.329	432.305	15.7085	26	1725
37	329.461	431.592	16.1137	26	1772
38	329.681	431.567	16.1599	26	1821
39	329.672	431.742	15.9911	26	1869
40	329.707	430.742	16.6063	26	1919
41	332.125	438.988	17.1049	26	1968
42	332.295	439.123	17.3805	26	2013
43	330.622	432.364	16.9918	26	2061
44	330.24	432.053	16.5009	26	2106
45	330.384	430.751	16.3926	26	2152
46	330.097	431.095	16.1883	26	2199
47	329.964	432.191	16.2564	26	2245
48	329.89	431.988	16.3524	26	2288
49	329.85	433.141	16.217	26	2335
50	330.06	431.502	16.219	26	2379
51	329.889	430.919	16.1627	26	2425
52	330.035	431.314	16.2602	26	2469
53	329.638	431.745	16.2994	26	2514
54	330.141	432.104	16.7424	26	2558
55	330.18	432.143	17.0873	26	2605
56	343.909	442.496	13.8435	26	2636
57	334.666	440.377	15.3924	26	2694
58	332.333	436.511	17.623	26	2742
59	331.213	433.483	17.5145	26	2788
60	331.668	434.691	17.4962	26	2835
61	331.822	435.36	17.4936	26	2881
62	331.832	435.743	17.7019	26	2926
63	331.772	435.057	17.7523	26	2972
64	331.287	432.138	17.716	26	3017
65	331.961	434.349	17.7754	26	3063
66	332.139	434.887	17.9024	26	3105
67	331.784	434.482	18.0077	26	3148
68	332.128	434.633	18.0428	26	3188
69	332.023	435.429	18.1587	26	3230
70	333.409	437.025	18.8314	26	3272
71	332.399	435.401	18.3232	26	3315
72	332.864	436.408	18.8293	26	3354
73	330.97	432.481	18.1788	26	3395
74	333.936	437.561	18.7756	26	3435
75	334.344	437.94	18.9482	26	3476
76	336.373	441.09	20.0861	26	3516
77	336.692	442.491	19.9952	26	3554
79	336.527	442.496	20.0514	26	3633
81	337.345	442.525	20.0067	26	3714
1	284.163	31.7772	16.5561	27	26
2	279.854	31.9274	17.2148	27	64
3	275.503	30.639	18.1544	27	101
4	283.792	31.955	16.5527	27	140
5	285.534	31.2081	16.9836	27	181
6	289.913	29.5022	18.8788	27	224
7	292.41	29.6273	19.2623	27	268
8	292.717	32.3962	21.1436	27	312
9	285.009	36.6604	25.5	27	367
10	279.331	42.5533	25.5	27	411
11	278.061	44.785	25.5	27	460
12	276.985	45.9153	25.5	27	510
13	270.976	50.3404	25.5	27	556
14	273.797	55.0655	25.5	27	605
15	272.759	57.7752	25.5	27	656
16	270.287	60.059	25.5	27	706
17	269.076	60.4796	25.5	27	757
18	267.732	59.9591	23.374	27	797
19	267.157	59.8014	23.4589	27	849
20	269.633	59.6943	25.5	27	914
21	270.23	59.9696	25.5	27	967
22	270.001	59.9488	25.5	27	1019
23	272.034	58.7401	25.5	27	1072
24	274.825	57.0445	25.5	27	1123
25	273.748	55.6111	25.5	27	1175
26	270.681	49.4746	25.5	27	1225
27	272.467	51.7138	25.5	27	1275
28	269.856	49.1087	25.5	27	1326
1	412.761	9.5199	21.6933	28	27
2	413.422	9.07738	21.8296	28	66
3	414.06	8.97099	21.0085	28	102
4	413.556	8.75423	21.1375	28	141
5	413.78	8.26793	20.9797	28	182
6	414.156	7.53826	20.7541	28	225
7	414.159	7.53839	21.4195	28	267
8	414.797	7.24384	21.1361	28	311
9	415.045	7.1849	20.7132	28	358
10	416.145	4.91599	20.7079	28	403
11	420.243	2.98023e-08	21.446	28	449
12	419.328	2.98023e-08	21.5144	28	499
13	419.649	2.98023e-08	21.8465	28	547
14	419.451	2.98023e-08	21.5573	28	597
15	419.326	2.98023e-08	22.6395	28	646
16	418.415	1.17684	21.2851	28	694
17	420.159	2.98023e-08	21.6357	28	744
18	419.459	2.98023e-08	21.8853	28	796
19	419.143	2.98023e-08	21.7673	28	848
20	418.982	2.98023e-08	22.956	28	900
21	418.652	2.98023e-08	23.1424	28	955
22	418.673	2.98023e-08	23.3412	28	1009
23	420.136	2.98023e-08	23.0391	28	1061
24	420.085	2.98023e-08	22.1863	28	1111
25	420.086	2.98023e-08	23.3609	28	1162
26	418.966	2.98023e-08	22.8417	28	1213
27	412.924	7.05952	25.5	28	1274
28	411.837	7.32134	25.5	28	1325
29	411.715	8.13954	25.5	28	1376
30	412.119	8.09029	25.5	28	1426
31	411.915	9.08582	25.5	28	1476
32	411.352	10.1386	25.5	28	1525
33	412.431	10.4179	25.5	28	1579
34	413.008	9.20185	25.5	28	1629
35	414.295	7.92457	25.5	28	1679
36	414.818	9.04051	25.5	28	1732
37	420.964	2.98023e-08	25.5	28	1781
38	422.61	2.98023e-08	24.0207	28	1815
39	423.628	2.98023e-08	25.5	28	1878
40	421.388	2.98023e-08	25.5	28	1926
41	421.459	2.98023e-08	25.5	28	1972
42	421.249	2.98023e-08	25.5	28	2019
43	421.787	0.940907	25.5	28	2067
44	422.381	2.98023e-08	25.5	28	2112
45	422.447	1.74559	25.5	28	2160
46	419.565	6.35369	25.5	28	2205
47	418.363	6.45447	25.5	28	2252
48	417.126	6.74463	25.5	28	2293
49	420.276	3.54177	25.5	28	2340
50	420.635	3.55095	25.5	28	2384
51	421.113	1.82295	25.5	28	2431
52	414.391	10.415	25.5	28	2475
53	414.994	9.27304	25.5	28	2520
54	414.302	9.01241	25.5	28	2564
55	413.751	9.20446	25.5	28	2608
56	416.353	7.28985	25.5	28	2653
57	422.09	2.98023e-08	25.5	28	2701
58	420.514	2.98023e-08	25.5	28	2745
59	421.648	1.4316	25.5	28	2792
60	421.757	2.98023e-08	25.5	28	2839
61	420.976	2.98023e-08	25.5	28	2884
62	421.124	2.98023e-08	25.5	28	2930
63	421.314	2.98023e-08	25.5	28	2976
64	422.167	2.98023e-08	25.5	28	3021
65	418.692	4.1947	25.5	28	3067
66	416.75	6.92061	25.5	28	3109
67	416.485	5.94603	25.5	28	3152
68	416.605	6.28421	25.5	28	3192
69	416.341	7.1756	25.5	28	3235
70	416.105	8.96908	25.5	28	3277
71	415.691	9.63848	25.5	28	3320
72	416.168	9.21147	25.5	28	3360
73	415.681	9.05693	25.5	28	3399
74	415.604	9.27425	25.5	28	3438
75	415.417	9.50118	25.5	28	3478
76	416.306	9.25777	25.5	28	3517
77	417.438	9.23854	25.5	28	3555
78	417.231	8.1317	25.5	28	3592
79	418.146	8.46869	25.5	28	3635
80	418.223	8.11588	25.5	28	3674
81	416.158	9.45229	25.5	28	3715
82	416.389	10.2715	25.5	28	3757
83	416.861	10.0177	25.5	28	3798
84	417.254	9.9249	25.5	28	3837
85	417.387	9.70156	25.5	28	3877
86	418.507	8.09479	25.5	28	3915
87	417.751	7.84652	25.5	28	3953
88	417.592	7.73317	25.5	28	3992
89	418.44	6.88288	25.5	28	4030
90	423.662	2.98023e-08	25.5	28	4066
91	423.367	0.742142	25.5	28	4105
92	422.932	2.98023e-08	25.5	28	4143
93	421.855	4.3518	25.5	28	4181
[truncated: 2,618 more rows]
