# Supplementary material for: Functional visualization of NK cell-mediated killing of metastatic single tumor cells
Source: eLife journal article supplement (doi:10.7554/elife.76269), 2022-02-03
Supplement: supp [file nk_pos_3.xlsx]

## Sheet: Sheet1
1	88.8637	57.1436	5.5	1	0
2	88.7287	58.3077	5.5	1	25
3	88.873	57.7786	5.5	1	49
4	90.258	54.3455	5.5	1	74
5	90.4612	54.0827	5.5	1	99
6	89.2	57.9209	5.5	1	125
7	89.2826	58.6661	5.5	1	151
8	89.2415	59.2817	5.5	1	177
9	89.1907	59.6809	5.5	1	203
10	89.6281	58.9023	5.5	1	228
11	89.703	59.0925	5.5	1	255
12	89.7589	59.4556	5.5	1	282
13	89.763	59.5662	5.5	1	309
14	89.9677	59.8948	5.5	1	338
15	90.033	60.0527	5.5	1	367
16	90.11	59.5646	5.5	1	396
17	90.2766	59.0287	5.5	1	426
18	90.1984	59.8768	5.5	1	455
19	90.0966	59.9677	5.5	1	484
20	90.1299	59.1036	5.5	1	512
21	90.0059	58.7742	5.5	1	542
22	89.9968	57.927	5.5	1	572
23	89.4635	59.9163	5.5	1	601
24	89.5976	59.9196	5.5	1	628
25	89.4696	59.0299	5.5	1	656
26	89.7804	59.0765	5.5	1	684
27	89.4554	59.0718	6.75608	1	714
28	89.6028	58.8138	5.5	1	741
29	89.3382	59.5857	5.5	1	768
30	89.3686	59.7663	5.5	1	795
31	89.217	59.5014	5.5	1	821
32	89.3647	58.1726	5.5	1	847
33	89.0551	58.87	6.76823	1	874
34	88.9117	58.7252	7.03578	1	901
35	89.1309	57.8891	5.5	1	928
36	89.1631	57.3261	7.21072	1	958
37	89.0144	58.1079	6.87271	1	988
38	88.9883	58.0755	7.06486	1	1016
39	90.0143	55.5332	5.5	1	1044
40	88.8175	57.4211	5.5	1	1073
41	89.0519	56.8955	5.5	1	1102
42	90.4867	54.5295	6.76534	1	1132
43	88.7304	58.0857	6.80726	1	1162
44	88.7378	57.8876	5.5	1	1191
45	89.9493	55.6193	5.5	1	1220
46	90.3745	54.3567	5.5	1	1248
47	88.8314	58.2078	7.02583	1	1279
48	90.7745	54.3258	17.5731	1	1329
49	90.1607	57.5292	16.631	1	1357
50	87.0003	61.6312	16.1995	1	1386
51	84.3901	62.595	16.4047	1	1417
52	83.7874	62.3295	16.744	1	1445
53	83.1721	62.8623	16.4774	1	1475
54	85.3042	63.5295	16.41	1	1504
55	84.5921	63.4929	16.3454	1	1534
56	83.145	63.1369	16.5584	1	1565
57	83.317	63.2783	16.6501	1	1596
58	83.5758	63.4657	16.4414	1	1627
59	84.9078	64.3599	16.3618	1	1656
60	86.401	64.638	16.0796	1	1688
61	90.3229	61.0669	8.63923	1	1704
62	90.6016	61.0133	8.14911	1	1735
63	90.4389	60.6905	8.24673	1	1768
64	90.5959	60.3419	8.12129	1	1798
65	90.2393	60.0448	8.19564	1	1827
66	90.1831	60.6769	8.37108	1	1858
67	90.4819	59.307	8.1877	1	1891
68	90.1344	59.8885	8.42884	1	1922
69	90.1569	59.9651	8.11827	1	1953
70	90.0893	60.1141	8.81135	1	1982
71	90.2872	59.7375	9.00663	1	2012
72	105.442	65.2443	13.7627	1	2040
73	107.177	67.003	13.252	1	2068
74	105.228	66.1935	13.3241	1	2096
75	105.669	66.0379	13.3935	1	2124
76	108.396	67.8196	12.7018	1	2153
77	113.588	74.3435	11.6498	1	2181
78	114.111	75.8417	11.895	1	2210
1	96.5455	110.799	5.5	2	1
2	96.6728	111.136	5.5	2	26
3	96.7554	110.897	5.5	2	50
4	97.1411	111.603	5.5	2	75
5	96.9953	111.407	5.5	2	100
6	99.426	112.253	5.5	2	126
7	100.245	112.632	5.5	2	152
8	99.111	112.972	5.5	2	178
9	98.921	112.649	5.5	2	204
10	99.1101	113.104	5.5	2	229
11	101.494	113.8	5.5	2	256
12	102.738	114.309	5.5	2	283
13	101.827	114.093	5.5	2	310
14	101.14	114.05	5.5	2	339
15	101.336	114.076	5.5	2	368
16	102.268	114.649	5.5	2	397
17	102.272	114.613	5.5	2	427
18	102.491	114.685	5.5	2	456
19	102.268	114.597	5.5	2	485
20	102.522	114.673	5.5	2	514
21	101.808	114.357	5.5	2	544
22	100.724	114.073	5.5	2	574
23	101.965	114.062	5.5	2	602
24	102.381	114.6	5.5	2	630
25	101.472	113.943	5.5	2	658
26	102.594	113.638	5.5	2	685
27	105.154	114.408	5.5	2	713
28	105.476	114.563	5.5	2	742
29	93.686	109.472	5.5	2	769
30	92.471	107.299	5.5	2	796
31	93.3635	106.28	5.5	2	822
32	93.1131	105.898	5.5	2	848
33	92.3609	106.416	5.5	2	873
34	92.1862	106.643	5.5	2	900
35	92.9976	105.956	5.5	2	929
36	94.4735	103.72	5.5	2	957
37	94.7114	103.493	5.5	2	987
38	93.7378	105.041	5.5	2	1015
39	93.7651	105.112	5.5	2	1045
40	93.5513	105.009	5.5	2	1074
41	94.1385	103.708	5.5	2	1103
42	94.4732	103.05	5.5	2	1131
43	94.2269	103.496	5.5	2	1161
44	93.9256	104.175	5.5	2	1192
45	94.6778	102.216	5.5	2	1221
46	94.8723	102.628	5.5	2	1249
47	93.7955	104.771	5.5	2	1278
48	93.3043	105.866	5.5	2	1308
49	93.4642	105.447	5.5	2	1338
50	94.6037	103.715	5.5	2	1367
51	94.9771	103.446	5.5	2	1398
52	94.5574	105.029	5.5	2	1428
53	94.431	105.423	5.5	2	1457
54	95.3714	104.422	5.5	2	1487
55	95.9563	104.054	5.5	2	1517
56	96.3128	104.199	5.5	2	1547
57	95.153	105.537	5.5	2	1578
58	95.4412	105.399	5.5	2	1609
59	96.3899	104.533	5.5	2	1640
60	97.0605	103.767	5.5	2	1671
61	96.4176	104.68	5.5	2	1702
62	96.2316	105.284	5.5	2	1734
63	95.6238	106.192	5.5	2	1766
64	95.3212	106.359	5.5	2	1796
65	96.5293	104.49	5.5	2	1826
66	96.7299	104.238	5.5	2	1857
67	95.8628	105.054	5.5	2	1889
68	95.1939	106.385	5.5	2	1920
69	95.0021	106.733	5.5	2	1951
70	95.6315	104.985	5.5	2	1980
71	95.9853	104.225	5.5	2	2010
72	95.8774	104.487	5.5	2	2038
73	95.1787	105.573	5.5	2	2065
74	94.9818	106.059	5.5	2	2092
75	95.5653	104.517	5.5	2	2121
76	96.3884	103.592	5.5	2	2150
77	96.0854	102.976	5.5	2	2178
78	95.3437	104.391	5.5	2	2207
79	95.0602	104.403	5.5	2	2236
80	95.0972	104.098	5.5	2	2265
81	95.253	103.337	5.5	2	2294
82	95.5444	103.258	5.5	2	2323
83	96.179	102.618	5.5	2	2353
84	95.1688	103.252	5.5	2	2383
85	95.1547	103.372	5.5	2	2413
86	95.2656	103.412	5.5	2	2442
87	95.379	102.595	5.5	2	2473
88	95.3091	102.411	5.5	2	2502
89	94.4509	103.971	5.5	2	2532
90	93.8159	105.75	5.5	2	2561
91	94.5009	104.684	6.9151	2	2592
92	95.3668	102.925	6.903	2	2621
93	95.5854	102.642	5.5	2	2650
94	95.4082	103.768	7.13445	2	2679
95	94.5736	105.854	7.19235	2	2710
96	95.1348	105.612	7.44171	2	2740
97	95.7265	104.859	7.37894	2	2769
98	96.2442	104.382	7.53599	2	2799
99	96.3977	104.105	7.58381	2	2830
100	96.4016	104.81	7.11469	2	2861
101	95.1661	107.236	7.551	2	2890
102	94.7423	108.612	7.85632	2	2918
103	94.2362	109.695	7.62009	2	2947
104	94.5415	109.584	7.79493	2	2976
105	94.2552	109.882	7.81154	2	3005
106	93.3855	110.913	7.74618	2	3035
107	93.1212	110.803	7.68646	2	3065
108	94.1577	111.287	8.31734	2	3095
109	96.0773	112.482	8.26336	2	3125
110	96.1194	112.606	8.44198	2	3155
111	95.417	112.021	8.13587	2	3184
112	95.2955	111.874	8.27595	2	3214
113	94.7486	111.293	8.03811	2	3244
114	95.4891	111.852	8.41298	2	3273
115	96.0195	112.179	8.58815	2	3302
116	95.2249	111.483	8.50765	2	3332
117	94.8471	111.139	8.10582	2	3361
118	94.7668	110.739	8.0358	2	3389
119	94.9543	111.054	7.86776	2	3417
120	95.355	111.298	8.16709	2	3446
121	95.2171	111.271	7.99324	2	3474
122	94.7127	110.667	8.09317	2	3503
123	94.3676	110.405	8.00865	2	3533
124	94.4882	110.263	8.06044	2	3561
125	95.0369	110.751	8.45376	2	3590
126	94.5426	110.183	8.2733	2	3618
127	94.3244	110.142	8.70748	2	3645
128	94.4222	110.189	8.5068	2	3673
129	94.7848	110.129	8.5453	2	3702
130	95.0956	110.568	8.73531	2	3731
131	94.7434	110.205	8.65827	2	3761
132	94.6109	110.118	8.93463	2	3791
133	94.7205	110.194	8.8273	2	3821
134	94.7741	110.405	8.99463	2	3851
135	95.5625	111.106	9.24573	2	3881
136	95.925	111.626	8.85897	2	3911
137	95.6907	111.599	8.97784	2	3941
138	95.4358	111.525	8.80322	2	3967
139	95.6066	111.465	8.74514	2	3993
140	96.2179	112.172	9.33936	2	4021
141	95.9553	112.065	9.33029	2	4048
142	95.5366	111.774	9.39493	2	4074
143	95.5372	111.547	9.18816	2	4099
144	96.5863	112.462	9.45424	2	4126
145	96.6261	112.712	9.5848	2	4156
146	96.5539	112.415	9.36914	2	4183
147	96.0163	112.375	9.50533	2	4210
148	96.2234	112.176	9.45398	2	4238
149	96.5497	112.423	9.37665	2	4264
150	96.5866	112.574	9.64647	2	4292
151	96.3175	112.503	9.77706	2	4318
152	95.5693	111.582	9.30165	2	4343
153	95.4342	111.8	8.98746	2	4369
154	95.3955	111.548	8.94577	2	4394
155	95.4217	111.738	9.16725	2	4418
156	95.527	111.37	9.21488	2	4442
157	95.5834	111.463	9.17194	2	4466
158	95.6887	111.412	9.50677	2	4488
159	95.5659	111.116	9.44014	2	4511
160	95.3322	110.964	9.07192	2	4534
161	94.9272	111.077	9.02912	2	4557
162	95.2306	111.033	9.12915	2	4580
163	94.9504	110.649	9.44676	2	4604
164	95.3661	110.647	9.34918	2	4628
165	95.143	110.171	9.55546	2	4652
166	95.2219	110.341	9.28389	2	4675
167	95.2883	110.501	9.5876	2	4697
168	95.2361	110.659	9.46645	2	4719
169	95.3428	110.394	9.45541	2	4742
170	95.3794	110.258	9.62035	2	4764
171	95.362	110.016	9.58795	2	4784
172	95.18	110.166	9.59716	2	4806
173	95.0412	109.972	9.50312	2	4828
174	95.0409	109.999	9.56196	2	4850
175	95.1062	110.05	9.50802	2	4871
176	95.0747	110.083	9.50436	2	4893
177	95.041	109.202	9.23785	2	4913
178	95.2286	109.437	9.39381	2	4937
179	95.305	109.665	9.46185	2	4960
180	95.7151	110.232	9.86488	2	4984
181	95.8843	110.381	9.99723	2	5008
182	96.1482	110.561	9.80257	2	5032
183	96.3495	110.794	9.90185	2	5055
184	96.4796	110.722	9.95868	2	5078
185	96.6764	110.917	10.1534	2	5102
186	96.6571	111.206	10.0072	2	5126
187	96.6944	111.146	9.93776	2	5150
188	96.8822	111.691	10.0525	2	5174
189	97.1119	111.458	10.119	2	5197
190	97.166	111.799	10.0251	2	5221
191	97.3759	111.549	9.98405	2	5245
192	97.4087	111.277	9.95941	2	5269
193	97.3335	111.027	9.70976	2	5292
194	97.2616	111.352	9.87358	2	5318
195	97.2016	111.046	9.69413	2	5344
196	97.1622	111.057	9.79955	2	5368
197	97.2784	110.88	9.85928	2	5394
198	97.1376	111.006	9.76287	2	5417
199	97.1694	110.368	9.6257	2	5443
200	96.8573	110.015	9.90826	2	5466
201	96.8445	110.05	10.0651	2	5488
202	96.504	110.297	9.97761	2	5511
203	96.4532	110.38	9.73786	2	5534
204	96.2721	110.43	9.54288	2	5557
205	96.0117	110.823	9.78289	2	5580
206	95.6387	110.766	9.77105	2	5603
207	95.9242	110.606	9.83139	2	5626
208	96.0776	109.982	9.77395	2	5649
209	96.4027	110.009	9.87083	2	5673
210	96.1122	110.096	9.97381	2	5698
211	95.7517	110.59	9.97383	2	5723
212	95.5656	110.69	10.1064	2	5745
213	95.5983	110.928	10.0605	2	5768
214	95.6103	110.666	10.1702	2	5791
215	95.7624	110.761	10.1115	2	5814
216	95.5429	110.758	10.1973	2	5838
217	95.8682	110.673	10.2047	2	5861
218	95.8192	110.429	10.0839	2	5884
219	95.7773	110.36	10.199	2	5907
220	95.7744	110.027	10.1104	2	5929
221	95.8764	110.061	10.2128	2	5951
222	96.2092	110.375	10.1563	2	5974
223	96.2457	110.24	10.3031	2	5996
224	96.4075	110.037	10.2897	2	6018
225	96.5376	110.438	10.424	2	6038
226	96.494	110.377	10.5193	2	6060
227	96.7763	110.942	10.6453	2	6081
228	96.8938	110.516	10.4751	2	6102
229	97.0918	110.812	10.6696	2	6123
230	97.1755	111.105	10.6017	2	6144
231	97.3932	110.965	10.542	2	6164
232	97.4959	111.01	10.6523	2	6185
233	97.353	111.381	10.6469	2	6205
234	97.4232	111.497	10.6241	2	6225
1	196.561	89.606	10.3383	3	2
2	196.504	89.5593	10.3127	3	27
3	196.786	89.6553	10.5579	3	51
4	197.019	89.9795	10.4596	3	76
5	197.001	90.0082	10.3002	3	101
6	197.029	90.2567	10.6037	3	127
7	196.868	90.3292	10.6508	3	153
8	197.054	91.1383	10.5924	3	179
9	197.379	90.979	10.5978	3	205
10	197.589	91.0941	10.6141	3	231
11	197.815	91.42	10.6952	3	258
12	197.878	90.9679	10.5877	3	285
13	197.829	91.3323	10.4356	3	312
14	197.604	91.3945	10.8941	3	341
15	197.993	91.4902	10.794	3	370
16	198.17	91.5608	10.7735	3	399
17	198.147	91.7259	10.6682	3	428
18	198.163	91.7588	10.5962	3	457
19	197.899	91.6002	10.9114	3	486
20	197.757	91.5736	10.7332	3	515
21	197.402	91.4191	10.6713	3	545
22	197.449	91.4995	10.6236	3	575
23	197.585	91.0114	10.5986	3	603
24	197.839	91.0524	10.5521	3	631
25	197.751	90.8604	10.705	3	659
26	195.484	95.931	11.3539	3	687
27	195.246	95.9882	11.5574	3	716
28	195.235	95.3622	11.4267	3	744
29	195.523	95.0205	11.4369	3	770
30	196.928	91.4332	10.9745	3	797
31	195.622	93.215	11.526	3	823
32	195.46	94.737	12.1013	3	849
33	195.215	95.1465	12.1744	3	875
34	195.042	95	11.6415	3	902
35	196.678	90.9006	11.0326	3	930
36	195.658	92.4929	11.2896	3	959
37	194.268	98.9431	14.0722	3	989
38	192.171	103.417	15.2082	3	1034
39	194.602	99.2654	13.9321	3	1047
40	194.741	98.8079	13.4807	3	1076
41	194.322	99.2785	13.8694	3	1104
42	193.771	99.4986	14.2408	3	1134
43	195.197	98.3736	13.7182	3	1164
44	195.551	97.9146	13.3383	3	1194
45	194.473	98.6639	13.5578	3	1223
46	194.147	98.233	13.6124	3	1251
47	193.862	98.6895	13.5485	3	1281
48	192.12	103.841	15.4756	3	1328
49	192.57	104.227	15.4934	3	1358
50	192.328	104.502	15.9654	3	1387
51	194.593	107.227	16.2505	3	1418
52	196.929	108.584	16.3799	3	1446
53	201.437	109.18	17.2759	3	1476
54	200.733	120.006	19.333	3	1506
55	201.5	120.176	19.2658	3	1536
56	201.532	119.251	19.1034	3	1566
57	202.042	118.702	19.046	3	1597
58	201.406	120.646	19.4581	3	1628
59	201.736	122.885	19.7285	3	1657
60	204.268	126.505	19.6091	3	1689
61	203.994	125.671	19.8008	3	1720
62	201.872	121.996	19.6441	3	1753
63	201.229	121.419	19.3751	3	1783
64	201.262	121.227	19.4767	3	1813
65	200.787	121.628	19.221	3	1844
66	200.043	122.527	19.1652	3	1876
67	199.966	122.1	18.8685	3	1908
68	201.321	120.39	19.6888	3	1939
69	201.414	119.992	19.539	3	1969
70	200.81	119.765	19.3949	3	2000
71	200.642	120.363	19.2402	3	2028
72	198.954	122.09	18.8913	3	2055
73	196.897	124.967	17.9295	3	2082
74	198.203	127.034	16.5924	3	2110
75	198.57	127.215	16.7636	3	2139
76	198.157	127.327	16.4181	3	2167
77	197.924	127.627	16.9848	3	2195
78	196.305	127.111	17.3874	3	2225
79	198.444	128.171	16.7269	3	2254
80	199.98	130.452	16.5733	3	2283
81	200.914	132.731	15.5831	3	2312
82	203.354	136.51	14.7792	3	2341
83	202.827	136.184	14.8411	3	2371
84	203.005	136.053	14.9844	3	2401
85	202.98	135.904	15.1867	3	2431
86	204.693	137.073	14.9536	3	2459
87	204.595	142.686	15.0141	3	2488
88	205.047	142.594	13.8341	3	2506
1	457.554	22.817	5.5	4	3
2	457.471	22.3709	5.5	4	28
3	457.446	22.4993	5.5	4	52
4	457.652	22.9473	5.5	4	77
5	457.553	22.7808	5.5	4	102
6	457.776	23.0526	5.5	4	128
7	457.765	23.2148	5.5	4	155
8	458.02	23.5023	5.5	4	180
9	458.321	23.7878	5.5	4	206
10	458.728	24.1498	5.5	4	232
11	458.817	24.1522	5.5	4	259
12	458.867	24.2025	5.5	4	286
13	458.99	24.1239	5.5	4	313
14	458.897	24.2695	5.5	4	343
15	459.06	24.4214	5.5	4	372
16	459.258	24.5007	5.5	4	401
17	459.581	24.8916	5.5	4	430
18	459.576	24.4387	5.5	4	459
19	459.318	24.1443	5.5	4	488
20	459.099	24.2284	5.5	4	517
21	458.485	24.4135	5.5	4	547
22	458.494	24.3694	5.5	4	577
23	458.521	24.381	5.5	4	605
24	458.367	24.5298	5.5	4	633
25	458.47	24.2791	5.5	4	661
26	458.149	24.111	5.5	4	689
27	458.405	23.6757	5.5	4	718
28	458.47	23.8651	5.5	4	746
29	458.095	23.6901	5.5	4	773
30	458.296	23.8271	5.5	4	799
31	470.55	21.1675	9.32812	4	826
32	457.823	23.7466	5.5	4	850
33	457.803	23.7339	5.5	4	876
34	457.87	23.5585	5.5	4	904
35	457.601	23.6652	5.5	4	932
36	457.813	23.5674	5.5	4	961
38	457.848	23.5944	5.5	4	1017
39	457.765	23.4178	5.5	4	1048
40	457.748	22.9534	5.5	4	1077
41	457.607	23.3207	5.5	4	1105
42	457.552	23.4999	5.5	4	1135
43	457.903	23.1743	5.5	4	1165
44	457.503	23.477	5.5	4	1195
46	457.603	22.8119	5.5	4	1252
47	457.482	22.9564	5.5	4	1282
48	457.521	23.2006	5.5	4	1310
50	458.165	23.5042	5.5	4	1369
51	458.251	23.72	5.5	4	1399
1	481.217	252.245	5.5	5	4
2	481.362	252.79	5.5	5	29
3	481.62	251.799	5.5	5	53
4	481.774	252.108	5.5	5	78
5	481.525	252.518	5.5	5	103
6	482.004	252.695	5.5	5	129
7	482.093	252.948	5.5	5	156
8	482.289	253.572	5.5	5	181
9	482.111	253.636	5.5	5	207
10	482.522	253.208	5.5	5	233
11	482.156	253.625	5.5	5	260
12	482.916	253.558	5.5	5	287
13	482.966	253.908	5.5	5	314
14	483.217	253.728	5.5	5	344
15	483.032	253.76	5.5	5	373
16	483.16	254.041	5.5	5	406
17	482.889	254.645	5.5	5	435
18	482.816	254.006	5.5	5	465
19	482.903	254.369	5.5	5	493
20	482.988	254.479	5.5	5	523
21	482.863	254.262	5.5	5	552
22	482.383	254.407	5.5	5	582
23	482.371	253.942	5.5	5	606
24	482.072	254.361	5.5	5	638
25	482.154	254.386	5.5	5	666
26	482.341	254.28	5.5	5	694
27	482.286	254.399	5.5	5	725
28	482.17	254.268	5.5	5	753
29	482.205	253.786	5.5	5	774
30	482.119	253.76	5.5	5	800
31	482.09	253.156	5.5	5	825
32	481.97	253.568	5.5	5	851
33	482.11	254.332	5.5	5	883
34	482.283	254.019	5.5	5	911
35	482.292	253.606	5.5	5	933
36	481.678	254.051	5.5	5	970
37	481.732	253.806	5.5	5	990
38	481.864	253.519	5.5	5	1018
39	481.751	253.471	5.5	5	1049
40	481.791	253.037	5.5	5	1078
41	481.754	254.025	5.5	5	1115
42	482.029	253.221	5.5	5	1136
43	481.569	253.533	5.5	5	1166
44	481.271	253.827	5.5	5	1196
45	481.446	253.309	5.5	5	1224
46	481.639	253.442	5.5	5	1253
47	482.051	253.48	5.5	5	1284
48	481.8	254.029	5.5	5	1321
49	481.894	253.623	5.5	5	1340
50	482.174	253.44	5.5	5	1370
51	482.14	253.427	5.5	5	1400
52	482.524	254.063	5.5	5	1439
53	482.837	254.527	5.5	5	1468
54	483.149	255.661	5.5	5	1497
55	483.176	255.421	5.5	5	1527
56	483.345	254.624	5.5	5	1559
57	483.45	254.871	5.5	5	1589
58	483.506	255.01	5.5	5	1621
59	484.218	254.562	5.5	5	1650
60	483.152	252.012	12.7962	5	1678
61	483.888	250.895	12.1421	5	1709
62	484.448	255.956	5.5	5	1746
63	484.211	255.321	5.5	5	1776
64	484.047	254.552	5.5	5	1807
65	484.734	251.804	7.93318	5	1830
66	484.514	251.418	8.47059	5	1861
67	484.464	251.552	7.56167	5	1894
68	484.271	251.816	7.65063	5	1924
70	484.044	251.327	6.82548	5	1984
71	483.427	251.998	5.5	5	2014
1	372.449	158.898	12.8925	6	5
2	371.987	159.164	13.0923	6	30
3	372.622	158.915	13.1815	6	54
4	372.796	159.181	13.0297	6	79
5	373.101	159.49	13.0328	6	104
6	372.988	159.51	12.9992	6	130
7	373.384	159.83	13.501	6	157
8	373.129	160.139	13.3656	6	182
9	373.023	160.471	13.3525	6	208
10	372.908	160.65	13.3302	6	234
11	373.362	160.678	13.1464	6	261
12	372.531	160.804	13.446	6	288
13	373.376	160.743	13.1304	6	315
14	373.467	160.888	13.6006	6	345
15	373.838	160.995	13.6157	6	374
16	373.952	161.317	14.0125	6	402
17	373.627	161.086	13.6063	6	431
18	373.479	161.195	13.4739	6	460
19	373.733	161.052	13.4889	6	489
20	373.989	160.772	13.1583	6	518
21	373.38	160.977	13.3833	6	548
22	373.102	160.851	13.1107	6	578
23	372.692	160.612	13.0537	6	607
24	372.91	160.955	13.1072	6	634
25	372.953	160.342	13.0685	6	662
26	373.189	160.509	13.1121	6	690
27	373.326	160.148	13.0152	6	720
28	373.262	160.015	13.1179	6	748
29	373.17	160.21	13.241	6	776
30	372.863	160.27	13.325	6	802
31	371.391	160.304	13.1626	6	828
32	371.549	160.39	13.379	6	853
33	372.941	159.856	13.6768	6	878
34	372.39	160.163	13.6421	6	905
35	372.171	159.799	13.257	6	935
36	371.681	160.186	13.2459	6	963
37	372.5	159.944	13.4129	6	992
38	372.623	159.626	13.3196	6	1021
39	372.648	159.654	13.2384	6	1051
40	372.688	159.721	13.0202	6	1080
41	372.846	159.698	13.2107	6	1108
42	372.805	159.645	13.5198	6	1138
43	372.582	159.592	13.2996	6	1168
44	372.695	159.683	13.3386	6	1198
45	372.906	159.627	13.1259	6	1226
46	372.815	159.57	13.0817	6	1255
47	372.938	159.436	13.0812	6	1286
48	372.574	159.702	13.4467	6	1313
49	372.629	159.979	13.4153	6	1343
50	372.86	159.929	13.5136	6	1373
51	373.137	160.329	13.6557	6	1403
52	373.223	160.563	13.5209	6	1431
53	370.896	160.743	13.852	6	1460
54	371.249	160.998	13.5757	6	1491
55	373.274	161.011	13.5525	6	1521
56	372.462	161.353	14.1267	6	1552
57	373.277	161.119	14.1159	6	1583
58	373.545	161.343	14.2447	6	1614
59	373.718	161.453	14.6875	6	1660
60	373.292	161.589	14.0596	6	1676
61	373.77	161.624	14.3572	6	1723
62	373.311	161.813	14.1973	6	1740
63	372.482	162.017	14.1422	6	1772
64	373.926	161.777	14.1264	6	1802
65	373.563	161.53	14.0584	6	1833
66	371.821	161.707	13.8549	6	1864
67	371.975	161.581	14.1462	6	1896
68	371.915	161.447	14.2323	6	1926
69	372.524	161.422	13.9944	6	1956
70	371.963	161.243	13.8431	6	1987
71	371.972	161.515	14.0396	6	2016
72	372.487	161.279	13.8188	6	2043
73	372.772	161.012	13.7803	6	2071
74	372.618	161.069	13.7828	6	2099
75	372.903	160.576	13.7259	6	2128
76	370.955	160.999	14.0624	6	2156
77	370.345	160.735	13.681	6	2185
78	370.669	160.868	13.6295	6	2213
79	370.669	160.649	13.5516	6	2243
80	370.59	160.644	13.8171	6	2273
81	370.393	160.836	13.9603	6	2302
82	371.815	160.403	14.1948	6	2331
83	372.147	160.438	14.1701	6	2360
84	373.237	160.403	13.9666	6	2390
85	373.109	160.254	13.792	6	2421
86	372.9	160.102	14.1601	6	2449
87	371.839	160.084	14.4229	6	2492
88	372.877	159.993	14.0603	6	2511
89	372.072	160.017	14.3202	6	2551
90	373.318	160.124	14.1342	6	2569
91	373.37	160.168	14.1702	6	2599
92	373.498	160.049	14.0553	6	2628
93	374.162	160.075	13.9463	6	2657
94	373.51	160.458	14.204	6	2686
95	373.782	160.785	14.4717	6	2728
96	373.786	161.046	14.8068	6	2758
97	373.927	161.346	14.7262	6	2787
98	374.001	161.673	15.1363	6	2815
99	373.842	161.646	14.9936	6	2848
100	373.98	161.603	15.3267	6	2876
101	373.481	161.632	15.1253	6	2905
102	373.482	161.614	14.9507	6	2933
103	373.706	161.632	14.9379	6	2962
104	374.353	161.823	14.8872	6	2990
105	374.448	161.847	14.9353	6	3019
106	374.447	161.753	15.1389	6	3049
107	372.996	161.91	15.0612	6	3079
108	373.226	161.718	15.0299	6	3109
109	373.346	161.584	15.1171	6	3138
110	373.812	161.458	15.0823	6	3169
111	373.081	161.413	14.5977	6	3198
112	373.303	161.372	14.5144	6	3228
113	373.045	161.138	14.9328	6	3259
114	373.146	161.083	14.858	6	3287
115	373.802	161.315	14.945	6	3317
116	373.77	161.173	15.1354	6	3347
117	371.488	161.16	15.0679	6	3375
118	371.527	161.128	14.7877	6	3403
119	372.302	160.948	14.9412	6	3432
120	372.488	160.822	14.767	6	3460
121	372.459	160.852	14.7674	6	3490
122	373.853	160.531	14.7692	6	3519
123	373.643	160.571	14.5456	6	3547
124	371.692	160.726	14.8202	6	3576
125	371.729	160.742	14.7346	6	3604
126	372.447	160.575	14.9275	6	3633
127	372.407	160.47	14.9505	6	3661
128	372.847	160.701	15.148	6	3689
129	372.59	160.243	14.9216	6	3718
130	372.564	160.387	14.9794	6	3747
131	372.371	160.352	14.9993	6	3777
132	373.456	160.929	15.2471	6	3806
133	374.097	160.831	15.2875	6	3836
134	374.369	160.788	15.3311	6	3866
135	374.54	160.447	15.3234	6	3896
136	374.202	160.902	15.2649	6	3926
137	373.948	161.469	15.2732	6	3954
138	374.287	161.747	15.1725	6	3980
139	374.126	162.1	15.6436	6	4007
140	374.496	161.709	15.4407	6	4034
141	374.643	161.896	15.4966	6	4060
142	375.402	161.975	15.5044	6	4086
143	373.14	162.541	15.8984	6	4112
144	373.715	163.112	16.0177	6	4141
145	374.575	163.379	15.7472	6	4170
146	375.433	163.415	15.9048	6	4197
147	375.391	163.836	16.161	6	4224
148	375.181	163.983	16.3342	6	4251
149	375.434	164.004	16.2425	6	4279
150	375.466	163.952	16.4183	6	4306
152	375.701	163.871	16.5081	6	4357
153	375.844	164.014	16.6172	6	4382
1	339.716	178.427	12.5218	7	6
2	339.8	178.253	12.4957	7	31
3	339.827	178.422	12.6873	7	55
4	335.678	192.057	14.8757	7	94
5	335.793	191.402	14.8255	7	120
6	335.78	190.464	14.6958	7	146
7	335.293	189.694	13.7184	7	158
8	335.593	190.718	14.0443	7	183
9	335.595	189.382	14.1549	7	209
10	335.974	188.753	14.5689	7	250
11	336.5	187.052	13.3211	7	262
12	335.891	189.682	14.5071	7	304
13	336.139	189.35	14.3347	7	332
14	336.419	188.775	13.6272	7	346
15	336.418	189.648	14.3634	7	390
16	336.423	192.158	14.9214	7	418
17	336.49	189.783	14.5059	7	447
18	336.412	189.443	13.9171	7	461
19	336.174	191.605	14.4362	7	505
20	338.788	182.55	13.3315	7	519
21	338.733	182.252	13.4618	7	549
22	341.302	179.832	12.8219	7	579
23	341.032	180.009	12.5408	7	608
24	340.974	179.537	12.8361	7	635
25	340.45	179.893	12.8223	7	663
26	340.396	179.928	12.7199	7	691
27	340.354	179.683	12.5961	7	721
28	340.634	179.626	12.4149	7	749
29	341.625	179.036	12.7531	7	777
30	341.613	178.655	13.1595	7	803
31	341.417	178.824	12.8995	7	829
32	340.145	179.787	13.6311	7	854
33	339.959	179.632	13.158	7	879
34	340.322	179.525	12.7868	7	906
35	339.653	179.959	12.3874	7	936
36	340.225	179.196	12.7641	7	964
37	340.882	178.662	13.1279	7	993
38	340.297	179.094	13.1301	7	1022
39	339.925	179.053	13.0844	7	1052
40	340.048	178.858	12.9696	7	1081
41	340.146	179.039	12.8675	7	1109
42	340.41	178.729	12.9636	7	1139
43	339.962	178.611	13.1663	7	1169
44	340.529	178.408	13.2831	7	1199
45	340.503	178.264	13.3156	7	1227
46	340.63	178.052	13.2411	7	1256
47	340.897	177.95	13.1082	7	1287
48	340.899	178.087	13.1025	7	1314
49	341.293	178.293	13.2074	7	1344
50	340.831	178.59	13.5553	7	1374
51	341.153	178.975	13.6978	7	1404
52	341.122	179.286	13.7838	7	1432
53	341.552	179.395	13.9599	7	1461
54	343.34	178.059	13.5788	7	1492
55	342.616	177.772	13.8537	7	1522
56	342.741	177.934	13.935	7	1553
57	342.706	178.523	14.4152	7	1600
58	343.103	178.834	14.2079	7	1615
59	342.648	179.462	13.9841	7	1645
60	343.598	179.073	13.8771	7	1677
61	343.473	178.155	14.1381	7	1708
62	342.836	179.099	14.2828	7	1756
63	343.138	178.869	14.307	7	1786
64	343.701	177.932	14.235	7	1803
65	343.521	177.76	14.0107	7	1834
66	342.916	178.118	14.074	7	1865
67	342.327	178.976	14.0903	7	1897
68	342.547	178.548	14.0226	7	1927
69	342.657	178.44	13.9293	7	1957
70	342.661	179.065	14.0547	7	1988
71	342.888	178.731	13.9246	7	2017
72	341.336	180.239	13.7842	7	2044
73	340.375	180.799	13.5077	7	2072
74	340.277	180.916	13.4415	7	2100
75	340.642	180.597	13.1836	7	2129
76	339.921	181.229	13.3409	7	2157
77	336.642	187.102	14.379	7	2199
78	336.008	188.693	14.4447	7	2227
79	335.752	189.7	15.0585	7	2257
80	335.722	190.167	15.0833	7	2286
81	335.737	190.849	15.1206	7	2315
82	335.729	191.721	15.0846	7	2344
83	335.871	188.697	14.7347	7	2373
84	335.764	189.732	15.2768	7	2403
85	335.96	189.214	14.9207	7	2433
86	335.403	188.792	15.0028	7	2464
87	335.32	188.323	14.9587	7	2493
88	335.257	188.417	14.7593	7	2524
89	335.749	188.274	15.1093	7	2552
90	335.507	189.139	15.1348	7	2582
91	336.471	186.935	14.7213	7	2613
92	336.503	187.179	15.2136	7	2642
93	335.818	188.259	14.9842	7	2671
94	335.859	189.287	15.1653	7	2701
95	335.852	189.38	15.5835	7	2729
96	336.081	189.623	15.6867	7	2759
97	336.523	190.39	15.8963	7	2788
98	336.985	190.574	15.7121	7	2816
99	336.929	191.198	15.6692	7	2849
100	336.922	190.953	15.5628	7	2877
102	337.331	191.816	16.3909	7	2934
103	337.325	191.511	16.3962	7	2963
104	337.378	191.594	16.8575	7	2991
105	337.427	191.012	16.4518	7	3020
106	337.21	189.664	15.6055	7	3050
107	336.651	190.733	15.7654	7	3080
108	336.548	190.788	16.0821	7	3110
109	336.951	191.183	16.4975	7	3139
110	336.802	190.181	16.0845	7	3170
111	336.664	191.193	16.5268	7	3199
112	336.414	190.623	16.0675	7	3229
113	336.111	189.981	15.5774	7	3260
114	336.191	190.126	15.6235	7	3288
115	336.264	190.113	15.9742	7	3318
116	336.283	189.567	15.8987	7	3348
117	336.289	190.123	16.2878	7	3376
118	336.814	189.532	15.6727	7	3404
119	336.207	190.15	15.3892	7	3433
120	336.056	189.978	15.4228	7	3461
121	336.093	190.547	15.5854	7	3491
122	336.238	190.484	15.8508	7	3520
123	336.177	190.673	15.9153	7	3548
124	336.378	191	15.827	7	3577
125	336.344	190.569	15.8199	7	3605
126	335.659	189.747	15.5633	7	3634
127	336.024	188.564	15.5876	7	3662
128	335.843	190.526	16.1386	7	3690
129	335.836	189.971	16.0247	7	3719
130	336.035	190.089	16.2914	7	3748
131	336.087	190.189	16.2201	7	3778
132	336.723	191.68	16.5914	7	3807
133	336.651	191.893	16.5142	7	3837
134	336.529	192.252	16.7928	7	3867
135	336.11	190.709	16.2736	7	3897
136	336.241	191.045	16.2708	7	3927
137	337.041	192.595	16.5062	7	3955
138	336.725	191.239	16.4186	7	3981
139	336.807	191.747	16.7139	7	4008
140	337.198	193.114	16.7841	7	4035
141	337.111	192.896	16.883	7	4061
142	337.32	193.165	16.8395	7	4087
143	337.598	193.68	17.1966	7	4113
144	337.595	193.377	16.9564	7	4142
145	337.972	193.805	17.1949	7	4171
146	337.905	194.121	17.1076	7	4198
147	337.625	193.359	17.0257	7	4225
148	337.488	193.209	16.98	7	4252
149	337.404	193.484	17.0788	7	4281
150	337.328	193.91	17.0474	7	4307
151	337.263	193.823	16.9765	7	4332
152	337.459	193.65	16.9781	7	4358
153	337.377	193.902	17.0196	7	4383
154	336.887	192.916	16.9761	7	4407
155	336.563	192.387	16.5128	7	4430
156	336.545	192.313	16.458	7	4454
157	336.72	192.68	16.8473	7	4477
158	337	193.025	16.7017	7	4500
159	337.177	194.511	16.7263	7	4523
160	367.928	191.951	21.8367	7	4550
161	366.339	193.85	20.9864	7	4570
162	366.849	193.449	21.3347	7	4593
163	352.507	196.514	18.8417	7	4617
164	351.951	196.19	18.8734	7	4640
1	396.028	237.539	13.2942	8	7
2	397.029	237.654	13.0672	8	32
3	396.39	237.562	13.1887	8	56
4	395.402	237.846	13.102	8	80
5	396.147	238.101	13.0285	8	105
6	397.162	238.654	13.0626	8	131
7	398.816	239.593	13.3147	8	159
8	398.315	239.573	13.4424	8	184
9	396.593	238.7	13.4696	8	210
10	394.161	239.226	13.4562	8	235
11	391.744	238.931	13.1469	8	263
12	395.36	239.054	13.218	8	289
13	397.896	239.789	13.4135	8	316
14	398.534	240.264	13.9067	8	347
15	398.833	240.229	13.6733	8	375
16	398.998	240.643	14.0026	8	403
17	398.251	240.296	13.7995	8	432
18	397.766	240.176	13.6784	8	462
19	397.572	239.986	13.2521	8	490
20	395.384	240.144	14.5371	8	535
21	393.507	240.316	16.0159	8	564
22	393.972	239.888	15.4567	8	593
23	393.527	239.925	15.7377	8	622
24	395.219	240.335	14.4118	8	650
25	394.914	239.731	15.1346	8	678
26	392.84	239.424	16.5233	8	707
1	185.579	332.482	5.5	9	8
3	186.08	332.308	5.5	9	57
4	185.524	333.082	5.5	9	81
5	185.78	333.234	5.5	9	106
6	186.861	333.7	5.5	9	132
7	187.214	334.234	5.5	9	160
8	187.552	334.319	5.5	9	185
9	188.105	334.843	5.5	9	211
10	188.952	337.051	5.5	9	236
11	186.696	336.305	5.5	9	264
12	183.822	330.571	5.5	9	290
13	184.182	330.413	5.5	9	317
14	186.001	332.586	5.5	9	348
15	188.29	336.078	5.5	9	376
16	186.824	334.696	5.5	9	404
17	184.453	329.593	5.5	9	433
18	184.776	329.373	5.5	9	463
19	185.141	329.259	5.5	9	491
20	185.664	330.379	5.5	9	520
21	188.28	334.669	5.5	9	550
22	188.698	335.934	5.5	9	580
23	188.297	336.104	5.5	9	609
24	187.329	336.132	5.5	9	636
25	188.039	336.348	5.5	9	664
26	188.13	335.933	5.5	9	692
27	188.167	335.498	5.5	9	722
28	187.829	335.753	5.5	9	750
29	188.693	336.176	5.5	9	778
30	188.716	336.98	5.5	9	804
31	188.521	336.881	5.5	9	830
32	187.646	335.426	5.5	9	855
33	187.48	335.454	5.5	9	880
34	187.558	335.596	5.5	9	907
35	187.729	335.357	5.5	9	937
36	187.873	335.381	5.5	9	965
37	187.405	335.445	5.5	9	994
38	185.744	333.286	5.5	9	1023
39	185.316	332.727	5.5	9	1053
40	185.161	332.177	5.5	9	1082
41	185.241	331.883	5.5	9	1110
42	184.991	331.335	5.5	9	1140
43	185.986	332.674	5.5	9	1170
44	185.695	332.529	5.5	9	1200
45	186.236	333.289	5.5	9	1228
46	186.254	333.253	5.5	9	1257
47	186.708	334.067	5.5	9	1288
48	186.903	333.858	5.5	9	1315
49	188.157	335.131	5.5	9	1345
50	187.726	335.054	5.5	9	1375
51	187.721	335.083	5.5	9	1405
52	187.901	335.282	5.5	9	1433
53	187.788	335.193	5.5	9	1462
54	187.915	334.576	5.5	9	1493
55	186.645	332.682	5.5	9	1523
56	187.03	333.001	5.5	9	1554
57	187.3	333.562	5.5	9	1584
58	187.355	334.036	5.5	9	1616
59	187.31	334.209	5.5	9	1646
60	187.705	334.559	5.5	9	1679
61	187.355	333.936	5.5	9	1710
62	187.467	333.593	5.5	9	1741
63	187.804	334.039	5.5	9	1773
64	187.86	334.501	5.5	9	1804
65	186.936	333.673	5.5	9	1836
66	186.746	333.431	5.5	9	1867
67	186.727	333.291	5.5	9	1899
68	186.662	333.213	5.5	9	1928
69	187.055	333.165	5.5	9	1959
70	187.098	333.585	5.5	9	1989
71	186.889	333.45	5.5	9	2018
72	186.533	333.474	5.5	9	2045
73	186.472	333.247	5.5	9	2073
74	186.256	332.486	5.5	9	2101
75	186.856	332.766	5.5	9	2130
76	186.452	332.481	5.5	9	2158
77	186.598	332.842	5.5	9	2186
78	186.419	333.053	5.5	9	2214
79	186.327	332.645	5.5	9	2244
80	186.356	332.761	5.5	9	2274
81	186.368	332.582	5.5	9	2303
82	186.648	332.589	5.5	9	2332
83	186.446	332.283	5.5	9	2361
84	186.431	332.487	5.5	9	2391
85	186.27	332.427	5.5	9	2422
86	186.055	332.37	5.5	9	2450
87	186.26	332.239	5.5	9	2480
88	186.926	332.661	5.5	9	2512
89	186.723	332.158	5.5	9	2538
90	186.348	331.548	5.5	9	2570
91	186.378	332.266	5.5	9	2600
92	186.188	331.947	5.5	9	2629
93	186.059	331.822	5.5	9	2658
94	186.752	332.494	5.5	9	2687
95	186.903	332.458	5.5	9	2716
96	187.35	332.508	5.5	9	2747
97	187.469	333.233	5.5	9	2776
98	186.711	332.663	5.5	9	2806
99	186.765	332.834	5.5	9	2838
100	187.088	333.179	5.5	9	2868
101	187.08	332.832	5.5	9	2898
102	187.801	333.483	5.5	9	2926
103	188.089	333.639	5.5	9	2955
104	187.968	333.828	5.5	9	2983
105	187.744	333.93	5.5	9	3012
106	187.549	333.55	5.5	9	3042
107	187.957	334.065	5.5	9	3072
108	187.678	333.771	5.5	9	3102
109	187.691	333.488	5.5	9	3132
110	187.749	333.631	5.5	9	3162
111	187.069	333.455	5.5	9	3192
112	187.072	333.404	5.5	9	3222
113	187.104	333.331	5.5	9	3251
114	187.285	333.122	5.5	9	3281
115	187.734	333.501	5.5	9	3310
116	187.688	333.157	5.5	9	3339
117	187.624	333.368	5.5	9	3367
118	187.163	333.1	5.5	9	3394
119	187.017	332.885	5.5	9	3423
120	187.086	332.68	5.5	9	3452
121	186.962	332.621	5.5	9	3480
122	187.097	332.368	5.5	9	3509
123	187.152	332.261	5.5	9	3539
124	186.696	332.479	5.5	9	3567
125	186.677	332.417	5.5	9	3597
126	186.417	332.242	5.5	9	3625
127	186.659	332.239	5.5	9	3653
128	186.854	332.112	5.5	9	3681
129	187.115	332.044	5.5	9	3709
130	187.533	332.691	5.5	9	3738
131	187.468	332.689	5.5	9	3769
132	187.344	332.615	5.5	9	3798
133	187.71	332.991	5.5	9	3828
134	187.604	333.026	5.5	9	3858
135	187.828	332.989	5.5	9	3888
136	188.017	333.308	5.5	9	3917
137	187.95	333.634	5.5	9	3945
138	188.094	333.808	5.5	9	3972
139	187.911	333.9	5.5	9	3998
140	188.207	334.235	5.5	9	4025
141	188.447	334.528	5.5	9	4052
142	188.828	334.34	5.5	9	4078
143	189.142	334.463	5.5	9	4106
144	188.983	334.88	5.5	9	4132
145	188.721	334.824	5.5	9	4161
146	188.664	335.019	5.5	9	4188
147	188.782	334.886	5.5	9	4215
148	188.974	335.028	5.5	9	4243
149	189.138	334.859	5.5	9	4270
150	189.022	334.644	5.5	9	4298
151	188.562	334.899	5.5	9	4324
152	188.325	334.632	5.5	9	4349
153	188.57	335.012	5.5	9	4374
154	188.782	335.054	5.5	9	4398
155	188.88	334.811	5.5	9	4422
156	188.812	334.454	5.5	9	4446
157	188.666	334.458	5.5	9	4470
158	188.516	334.371	5.5	9	4492
159	188.635	334.493	5.5	9	4515
160	188.421	334.651	5.5	9	4538
161	188.17	334.065	5.5	9	4561
162	188.348	334.274	5.5	9	4584
163	188.868	334.384	5.5	9	4608
164	188.134	333.997	5.5	9	4632
165	188.068	334.336	5.5	9	4656
166	186.958	332.875	5.5	9	4679
167	185.167	329.373	5.5	9	4701
168	185.949	328.949	5.5	9	4723
169	185.21	327.726	6.76229	9	4747
170	186.11	327.789	6.93582	9	4769
171	185.914	328.844	5.5	9	4788
172	184.206	328.261	5.5	9	4810
173	182.882	327.677	5.5	9	4832
174	187.283	331.85	5.5	9	4854
175	187.91	332.665	5.5	9	4875
176	187.27	332.214	5.5	9	4897
177	187.04	331.625	5.5	9	4918
178	187.214	332.128	5.5	9	4943
179	187.169	332.788	5.5	9	4965
180	186.623	332.728	5.5	9	4989
181	186.203	331.55	5.5	9	5013
182	185.468	329.943	5.5	9	5037
183	184.337	328.768	5.5	9	5059
184	180.953	327.552	5.5	9	5082
185	178.973	327.176	5.5	9	5107
186	178.567	327.252	5.5	9	5131
187	180.015	327.62	5.5	9	5155
188	180.971	327.981	5.5	9	5179
189	182.217	328.544	5.5	9	5202
190	183.064	328.878	5.5	9	5226
191	183.043	329.05	5.5	9	5250
192	183.239	329.206	5.5	9	5274
193	184.239	329.968	5.5	9	5297
194	184.334	330.142	5.5	9	5323
195	184.998	330.375	5.5	9	5349
196	185.515	330.485	5.5	9	5373
197	187.523	331.906	5.5	9	5399
198	187.437	332.392	5.5	9	5422
199	185.026	330.315	5.5	9	5447
200	184.584	330.318	5.5	9	5470
201	184.219	329.652	5.5	9	5493
202	184.495	330.165	5.5	9	5516
203	185.881	330.35	5.5	9	5539
204	187.023	331.582	5.5	9	5562
205	188.086	333.403	5.5	9	5586
206	188.533	334.403	5.5	9	5609
207	188.216	334.039	5.5	9	5630
208	188.374	334.247	5.5	9	5654
209	188.358	333.805	5.5	9	5679
210	188.567	333.734	5.5	9	5704
211	188.433	334.088	5.5	9	5729
212	188.169	334.12	5.5	9	5751
213	188.153	334.268	5.5	9	5774
214	188.637	334.602	5.5	9	5796
215	188.848	334.458	5.5	9	5820
216	189.222	334.515	5.5	9	5844
217	188.825	334.145	5.5	9	5867
218	189.06	334.469	5.5	9	5890
219	188.872	334.211	5.5	9	5913
220	188.633	334.185	5.5	9	5935
221	188.85	334.243	5.5	9	5956
222	189.006	334.208	5.5	9	5979
223	189.447	334.423	5.5	9	6000
224	189.519	334.756	5.5	9	6022
225	189.586	335.13	5.5	9	6041
226	189.649	335.424	6.75775	9	6064
227	189.799	335.704	7.31852	9	6086
228	190.079	336.083	7.53459	9	6108
229	190.341	336.247	7.27098	9	6129
230	190.388	336.218	7.0589	9	6150
231	190.825	336.386	7.43361	9	6169
232	190.928	336.824	7.32012	9	6190
233	190.64	336.763	7.731	9	6210
234	190.647	336.655	7.37595	9	6232
1	195.508	388.183	5.5	10	9
2	195.548	387.949	5.5	10	33
3	195.586	388.197	5.5	10	58
4	195.474	388.4	5.5	10	82
5	195.702	389.106	5.5	10	107
6	196.854	389.807	5.5	10	133
7	197.217	390.186	5.5	10	161
8	197.351	390.269	5.5	10	186
9	197.097	390.711	5.5	10	212
10	197.138	390.665	5.5	10	237
11	197.164	391.059	5.5	10	265
12	197.267	390.918	5.5	10	291
13	197.524	390.676	5.5	10	318
14	197.872	390.93	5.5	10	349
15	197.843	391.061	5.5	10	377
16	197.348	390.939	5.5	10	405
17	197.379	390.677	5.5	10	434
18	196.889	390.481	5.5	10	464
19	197.075	390.933	5.5	10	492
20	196.989	390.757	5.5	10	521
21	197.117	390.637	5.5	10	551
22	196.579	390.334	5.5	10	581
23	196.122	390.107	5.5	10	610
24	196.532	390.203	5.5	10	637
25	196.169	389.962	5.5	10	665
26	195.593	389.611	5.5	10	693
27	194.479	388.827	5.5	10	723
28	194.203	388.572	5.5	10	751
29	193.84	388.22	5.5	10	779
30	194.309	388.843	5.5	10	805
31	194.632	388.954	5.5	10	831
32	195.032	389.218	5.5	10	856
33	194.73	389.027	5.5	10	881
34	195.142	388.982	5.5	10	908
35	194.885	388.687	5.5	10	938
36	195.237	389.013	5.5	10	966
37	195.167	389.268	5.5	10	995
38	194.961	389.038	5.5	10	1024
39	195.563	389.104	5.5	10	1054
40	195.389	389.171	5.5	10	1083
41	195.669	389.184	5.5	10	1111
42	195.53	388.891	5.5	10	1141
43	195.087	389.004	5.5	10	1171
44	195.158	388.785	5.5	10	1201
45	195.467	388.843	5.5	10	1229
46	195.835	388.863	5.5	10	1258
47	195.847	388.862	5.5	10	1289
48	195.959	388.889	5.5	10	1316
49	196.384	389.343	5.5	10	1346
50	197.138	389.211	5.5	10	1376
51	197.065	389.637	5.5	10	1406
52	197.712	389.435	5.5	10	1434
53	197.971	389.772	5.5	10	1463
54	198.48	390.148	5.5	10	1494
55	197.737	389.641	5.5	10	1524
56	197.623	390.047	5.5	10	1555
57	197.666	390.236	5.5	10	1585
58	197.382	389.892	5.5	10	1617
59	196.922	389.223	5.5	10	1647
60	196.539	388.556	5.5	10	1680
61	197.147	389.035	5.5	10	1711
62	197.312	389.614	5.5	10	1742
63	196.605	389.486	5.5	10	1774
64	196.298	389.229	5.5	10	1805
65	196.262	389.417	5.5	10	1837
66	195.822	389.065	5.5	10	1868
67	195.196	388.708	5.5	10	1900
68	195.207	388.698	5.5	10	1929
69	194.628	388.162	5.5	10	1960
70	194.396	388.264	5.5	10	1990
71	194.697	388.244	5.5	10	2019
72	194.824	388.363	5.5	10	2046
73	195.179	388.314	5.5	10	2074
74	194.933	388.369	5.5	10	2102
75	194.799	387.998	5.5	10	2131
76	194.13	387.989	5.5	10	2159
77	193.989	387.933	5.5	10	2187
78	193.731	388.207	5.5	10	2215
79	193.448	388.116	5.5	10	2245
80	194.006	388.224	5.5	10	2275
81	193.873	388.292	5.5	10	2304
82	194.119	388.161	5.5	10	2333
83	193.479	387.836	5.5	10	2362
84	193.49	387.9	5.5	10	2392
85	193.754	388.212	5.5	10	2423
86	193.832	388.199	5.5	10	2451
87	193.807	388.091	5.5	10	2481
88	193.933	388.021	5.5	10	2513
89	194.024	388.142	5.5	10	2539
90	194.065	388.173	5.5	10	2571
91	193.727	388.122	5.5	10	2601
92	193.917	387.948	5.5	10	2630
93	193.851	388.035	5.5	10	2659
94	194.354	388.049	5.5	10	2688
95	194.658	388.295	5.5	10	2717
96	194.519	388.372	5.5	10	2748
97	194.747	388.533	5.5	10	2777
98	194.737	388.889	5.5	10	2807
99	194.91	389.293	5.5	10	2839
100	195.325	389.494	5.5	10	2869
101	195.498	389.721	5.5	10	2899
102	195.561	389.69	5.5	10	2927
103	195.719	389.657	5.5	10	2956
104	195.363	389.801	5.5	10	2984
105	195.457	389.519	5.5	10	3013
106	195.339	389.457	5.5	10	3043
107	195.419	389.387	5.5	10	3073
108	195.37	389.483	5.5	10	3103
109	194.829	389.175	5.5	10	3133
110	194.545	388.917	5.5	10	3163
111	194.233	388.78	5.5	10	3193
112	194.05	388.64	5.5	10	3223
113	194.196	388.283	5.5	10	3252
114	194.384	387.949	5.5	10	3282
115	194.541	388	5.5	10	3311
116	193.893	387.548	5.5	10	3340
117	193.586	387.885	5.5	10	3368
118	193.488	387.914	5.5	10	3395
119	193.262	388.081	5.5	10	3424
120	193.764	387.761	5.5	10	3453
121	194.102	387.829	5.5	10	3481
122	194.009	387.799	5.5	10	3510
123	193.989	387.937	5.5	10	3540
124	193.861	387.803	5.5	10	3568
125	193.894	387.981	5.5	10	3598
126	193.884	388.014	5.5	10	3626
127	194.186	388.235	5.5	10	3654
128	194.411	388.222	5.5	10	3682
129	194.282	387.984	5.5	10	3710
130	194.337	387.745	5.5	10	3739
131	194.028	387.766	5.5	10	3770
132	194.105	387.846	5.5	10	3799
133	194.245	387.889	5.5	10	3829
134	194.582	388.058	5.5	10	3859
135	195.123	388.293	5.5	10	3889
136	194.806	388.185	5.5	10	3918
137	194.811	388.356	5.5	10	3946
138	194.859	388.258	5.5	10	3973
139	195.009	388.545	5.5	10	3999
140	195.206	388.843	5.5	10	4026
141	195.872	390.055	5.5	10	4053
142	196.512	390.351	5.5	10	4079
143	196.629	390.325	5.5	10	4107
144	197.067	390.644	5.5	10	4133
145	196.967	390.703	5.5	10	4162
146	197.171	390.627	5.5	10	4189
147	197.296	390.62	5.5	10	4216
148	197.345	390.649	5.5	10	4244
149	197.3	390.678	5.5	10	4271
150	197.126	390.996	5.5	10	4299
151	197.035	391.052	5.5	10	4325
152	197.204	391.252	5.5	10	4350
153	198.326	391.347	5.5	10	4375
154	198.874	390.766	5.5	10	4399
155	198.878	389.944	5.5	10	4423
156	197.63	388.619	5.5	10	4447
157	196.782	388.532	5.5	10	4471
158	196.821	388.425	5.5	10	4493
159	196.569	388.47	5.5	10	4516
160	196.875	388.798	5.5	10	4539
161	196.935	388.858	5.5	10	4562
162	197.059	388.644	5.5	10	4585
163	196.58	388.773	5.5	10	4609
164	196.411	389.355	5.5	10	4633
165	196.717	390.063	5.5	10	4657
166	196.701	389.96	5.5	10	4680
167	196.593	389.68	5.5	10	4702
168	196.159	389.559	5.5	10	4724
169	196.098	390.073	5.5	10	4746
170	196.431	390.582	5.5	10	4768
171	196.79	390.662	5.5	10	4789
172	197.146	390.955	5.5	10	4811
173	197.747	391.204	5.5	10	4833
174	197.772	391.093	5.5	10	4855
175	198.037	391.101	5.5	10	4876
176	197.502	390.916	5.5	10	4898
177	197.485	391.083	5.5	10	4919
178	197.639	391.029	5.5	10	4944
179	197.899	391.098	5.5	10	4966
180	198.473	391.224	5.5	10	4990
181	198.834	391.603	5.5	10	5014
182	199.4	392.002	5.5	10	5038
183	199.256	392.093	5.5	10	5060
184	199.638	392.589	6.76478	10	5083
185	200.187	393.027	7.14771	10	5108
186	200.078	393.09	7.24333	10	5132
187	200.228	393.295	7.35637	10	5156
188	200.481	393.296	7.08536	10	5180
189	200.295	393.06	6.79473	10	5203
190	200.283	393.043	5.5	10	5227
191	199.352	392.445	5.5	10	5251
192	198.44	391.308	5.5	10	5275
193	197.841	390.821	6.81604	10	5298
194	197.984	390.166	5.5	10	5324
195	198.036	389.861	5.5	10	5350
196	197.734	389.798	5.5	10	5374
197	197.704	388.8	5.5	10	5400
198	197.999	387.421	5.5	10	5423
199	198.064	386.783	5.5	10	5448
200	197.668	386.647	5.5	10	5471
201	197.708	386.573	5.5	10	5494
202	198.12	386.18	5.5	10	5517
203	197.876	385.845	5.5	10	5540
204	197.623	385.875	5.5	10	5563
205	197.385	385.947	5.5	10	5587
206	197.802	385.497	5.5	10	5610
207	197.739	385.523	5.5	10	5631
208	198.065	385.311	5.5	10	5655
209	197.809	385.6	5.5	10	5680
210	197.751	385.029	5.5	10	5705
211	198	384.098	5.5	10	5730
212	198.052	384.235	5.5	10	5752
213	198.021	384.761	5.5	10	5775
214	197.946	384.775	5.5	10	5797
215	197.891	384.849	5.5	10	5821
216	197.825	384.87	5.5	10	5845
217	197.638	384.747	5.5	10	5868
218	197.653	384.665	5.5	10	5891
219	198.11	384.519	5.5	10	5914
220	198.126	384.234	5.5	10	5936
221	198.295	384.108	5.5	10	5957
222	198.638	384.036	5.5	10	5980
223	198.638	383.917	5.5	10	6001
224	198.489	384.101	5.5	10	6023
225	198.682	384.609	5.5	10	6042
226	198.871	384.819	5.5	10	6063
227	199.102	385.223	5.5	10	6085
228	199.192	385.38	5.5	10	6107
229	199.315	385.418	5.5	10	6128
230	199.257	385.838	5.5	10	6149
231	199.052	385.939	5.5	10	6168
232	199.084	386.701	5.5	10	6189
233	199.201	387.223	5.5	10	6209
234	199.285	387.504	5.5	10	6231
1	219.476	409.906	12.1516	11	10
2	218.676	409.931	12.0547	11	34
3	218.662	409.468	11.5841	11	59
4	218.761	410.445	12.267	11	83
5	220.428	409.705	12.5409	11	108
6	220.398	409.723	12.6841	11	134
7	219.166	411.511	12.9339	11	162
8	219.965	411.759	12.7364	11	187
9	220.403	413.05	12.5429	11	213
10	222.47	417.08	12.2599	11	238
11	224.606	421	12.594	11	266
12	224.226	421.66	12.7019	11	292
13	222.232	418.082	12.244	11	319
14	224.582	421.099	12.3526	11	350
15	224.327	423.008	13.1077	11	378
16	221.853	431.7	15.7593	11	421
17	223.133	433.817	16.0779	11	450
18	223.056	432.569	16.1078	11	479
19	222.665	435.367	15.815	11	508
20	222.371	435.516	15.9308	11	537
21	221.499	435.651	16.1857	11	567
22	225.119	456.98	25.5	11	598
1	325.28	495.073	5.5	12	11
2	324.655	495.199	5.5	12	35
3	324.789	495.337	5.5	12	60
4	325.415	495.14	5.5	12	84
5	326.846	494.014	5.5	12	109
6	326.055	494.873	5.5	12	135
7	325.06	495.779	5.5	12	163
8	325.612	495.774	5.5	12	188
9	325.777	495.912	5.5	12	214
10	331.873	492.612	5.5	12	239
11	332.824	492.689	5.5	12	267
12	331.294	493.304	5.5	12	293
13	326.541	496.008	5.5	12	320
14	325.932	496.645	5.5	12	351
15	325.939	496.816	5.5	12	379
16	326.793	496.578	5.5	12	407
17	327.129	496.502	5.5	12	436
18	327.796	496.184	5.5	12	466
19	332.14	493.632	5.5	12	494
20	332.254	493.029	5.5	12	524
21	331.032	493.314	5.5	12	553
22	331.204	493.266	5.5	12	583
23	331.214	493.165	5.5	12	611
24	331.065	493.259	5.5	12	640
25	330.781	493.365	5.5	12	668
26	329.317	493.874	5.5	12	696
27	326.024	496.023	5.5	12	726
28	325.697	496.322	5.5	12	754
29	326.056	495.893	5.5	12	781
30	327.05	495.181	5.5	12	807
31	328.008	494.358	5.5	12	833
33	325.743	495.936	5.5	12	884
34	325.39	495.67	5.5	12	912
35	326.819	494.432	5.5	12	942
36	330.155	492.574	5.5	12	971
37	327.464	494.474	5.5	12	999
38	326.12	495.446	5.5	12	1030
39	325.699	495.16	5.5	12	1059
40	325.508	495.495	5.5	12	1088
41	325.133	495.442	5.5	12	1116
42	324.881	495.532	5.5	12	1147
43	325.55	495.096	5.5	12	1177
44	325.703	495.362	5.5	12	1206
45	326.089	495.471	5.5	12	1235
46	325.881	495.395	5.5	12	1265
47	325.656	494.868	5.5	12	1295
48	325.273	495.29	5.5	12	1322
49	325.969	495.195	5.5	12	1351
50	326.365	495.23	5.5	12	1381
51	326.747	495.649	5.5	12	1413
52	327.177	495.548	5.5	12	1440
53	326.884	495.983	5.5	12	1470
54	326.896	495.971	5.5	12	1499
55	327.059	496.094	5.5	12	1529
56	327.328	496.389	5.5	12	1561
57	327.137	496.654	5.5	12	1591
58	327.697	496.907	5.5	12	1623
59	328.058	496.71	5.5	12	1651
60	327.449	497.186	5.5	12	1683
61	327.549	496.979	5.5	12	1715
62	327.616	497.218	5.5	12	1748
63	328.165	496.872	6.8125	12	1778
64	327.934	497.097	5.5	12	1809
65	328.056	497.396	5.5	12	1840
66	327.81	497.101	5.5	12	1871
67	327.271	497.082	5.5	12	1904
68	326.901	496.747	5.5	12	1933
69	327.161	496.879	5.5	12	1964
70	327.275	496.692	5.5	12	1994
71	327.358	496.892	5.5	12	2023
72	327.315	496.6	5.5	12	2050
73	327.091	496.498	5.5	12	2078
74	326.138	497.361	5.5	12	2106
75	325.705	496.879	5.5	12	2135
76	325.971	496.761	5.5	12	2163
77	326.777	496.268	5.5	12	2191
78	326.915	496.271	5.5	12	2219
79	326.897	496.272	5.5	12	2249
80	326.462	496.219	5.5	12	2279
81	326.04	496.12	5.5	12	2307
82	325.97	496.211	5.5	12	2336
83	326.065	496.2	5.5	12	2366
84	326.398	496.244	5.5	12	2396
85	326.917	496.042	5.5	12	2427
86	326.642	495.774	5.5	12	2455
87	326.197	496.027	5.5	12	2484
88	325.965	495.893	5.5	12	2517
89	326.185	495.94	5.5	12	2542
90	326.517	495.817	5.5	12	2574
91	326.778	495.812	5.5	12	2604
92	327.141	496.188	5.5	12	2633
93	326.433	496.276	5.5	12	2662
94	326.318	496.424	5.5	12	2691
95	326.199	496.87	5.5	12	2720
96	326.386	497.112	5.5	12	2751
97	326.947	497.118	6.80106	12	2780
98	327.391	497.166	5.5	12	2810
99	327.815	497.224	5.5	12	2842
100	327.389	497.319	5.5	12	2872
101	327.611	497.674	7.22245	12	2902
102	327.16	497.674	7.29267	12	2930
103	327.21	497.75	7.11199	12	2959
104	327.569	497.635	6.93069	12	2987
105	328.008	497.584	7.06448	12	3016
106	328.278	497.297	6.93374	12	3046
107	328.24	497.029	7.07197	12	3076
108	327.971	496.723	6.91295	12	3106
109	328.147	496.738	7.46589	12	3136
110	327.778	496.693	7.22493	12	3166
111	327.986	496.559	7.01224	12	3196
112	328.098	496.613	6.91125	12	3226
113	327.12	496.801	5.5	12	3255
115	327.057	496.599	5.5	12	3314
116	327.048	496.404	7.04962	12	3343
117	327.54	496.305	6.99718	12	3371
119	327.021	496.607	5.5	12	3427
121	326.42	496.425	5.5	12	3484
122	326.933	496.13	7.26578	12	3513
124	326.995	496.235	7.45129	12	3571
1	458.231	495.65	5.5	13	12
2	458.488	496.171	5.5	13	36
3	458.336	495.948	5.5	13	61
4	458.349	496.337	5.5	13	85
5	458.283	496.731	5.5	13	110
6	458.501	496.407	5.5	13	136
7	459.869	496.799	5.5	13	164
8	458.821	497.286	5.5	13	189
9	458.118	496.073	5.5	13	215
10	458.252	496.361	5.5	13	240
11	458.549	496.938	5.5	13	268
12	459.69	497.61	5.5	13	294
13	459.81	497.745	5.5	13	321
14	459.206	497.962	5.5	13	352
15	459.516	497.522	5.5	13	380
16	459.934	497.597	5.5	13	408
17	459.831	498.374	5.5	13	437
18	459.752	498.196	5.5	13	467
19	459.424	497.408	5.5	13	495
20	459.644	497.508	5.5	13	525
21	459.427	497.87	5.5	13	554
22	459.103	498.064	5.5	13	584
23	459.223	497.524	5.5	13	612
24	458.888	497.727	5.5	13	641
25	459.177	497.756	5.5	13	669
26	458.991	497.447	5.5	13	697
27	459.082	497.308	5.5	13	727
28	458.956	497.667	5.5	13	755
29	458.991	497.243	5.5	13	782
30	459.085	497.011	5.5	13	808
31	458.504	497.871	5.5	13	834
32	459.048	496.964	5.5	13	858
33	458.292	496.484	5.5	13	885
34	457.485	495.69	5.5	13	913
35	457.805	496.235	5.5	13	943
36	458.446	496.717	5.5	13	972
37	458.173	496.424	5.5	13	1000
38	457.853	496.222	5.5	13	1031
39	457.882	496.733	5.5	13	1060
40	458.113	496.799	5.5	13	1089
41	458.13	496.577	5.5	13	1117
42	458.297	496.572	5.5	13	1148
43	457.583	497.324	5.5	13	1178
44	457.749	496.175	5.5	13	1207
45	457.873	495.705	5.5	13	1236
46	459.196	496.298	5.5	13	1266
47	459.446	496.519	5.5	13	1296
48	459.348	496.364	5.5	13	1323
49	459.162	496.089	5.5	13	1352
50	459.784	496.494	5.5	13	1382
51	460.564	496.552	5.5	13	1414
52	460.422	496.536	5.5	13	1441
53	456.526	489.716	5.5	13	1469
54	457.378	488.557	7.32562	13	1500
55	452.205	507.934	9.30175	13	1531
1	259.504	396.091	10.6543	14	13
2	259.744	396.088	10.9137	14	37
3	259.298	396.12	10.6453	14	62
4	259.062	396.461	10.8033	14	86
5	260.129	396.607	10.8612	14	112
6	265.612	394.155	9.01022	14	137
7	264.389	395.051	8.77748	14	165
8	264.06	395.878	9.30657	14	191
9	261.947	396.956	10.8248	14	217
10	261.002	397.243	10.7714	14	242
11	263.294	396.881	10.6756	14	270
12	265.601	395.79	9.62566	14	296
13	261.876	397.674	11.0987	14	324
14	260.748	397.879	11.5355	14	354
15	261.726	397.987	11.3266	14	382
16	264.847	396.811	10.4271	14	410
17	277.028	395.118	7.52126	14	438
18	276.242	395.529	7.68338	14	468
19	276.525	394.751	7.13003	14	496
20	276.405	394.766	7.17443	14	526
21	277.011	393.639	6.92535	14	555
22	276.035	393.664	7.10959	14	585
23	275.164	393.053	6.84114	14	613
24	275.557	392.788	5.5	14	639
25	275.474	393.561	5.5	14	667
26	276.725	392.143	5.5	14	695
27	265.643	395.176	9.48209	14	729
28	266.443	394.262	8.45988	14	756
29	266.333	394.39	8.82831	14	783
30	274.679	393.412	8.56044	14	809
31	275.788	392.242	7.60136	14	835
32	275.232	393.07	7.1395	14	859
33	275.272	393.313	7.47923	14	886
34	275.035	392.911	7.40901	14	914
35	275.317	393.191	7.43584	14	944
36	274.202	393.047	7.51814	14	973
37	274.575	393.263	7.54965	14	1001
38	270.219	393.68	6.55292	14	1029
39	272.595	392.955	7.3945	14	1061
40	272	393.093	7.76362	14	1090
41	266.846	393.852	9.19457	14	1118
42	266.451	393.881	9.38519	14	1149
43	264.057	394.512	9.189	14	1179
44	255.518	395.123	11.9171	14	1209
45	261.758	396.098	11.08	14	1237
46	253.032	394.757	11.6771	14	1261
47	253.802	394.919	11.8595	14	1294
48	253.727	395.163	12.1255	14	1320
49	253.48	394.875	12.063	14	1350
50	253.788	395.074	12.602	14	1380
51	253.827	395.458	12.5098	14	1411
52	253.745	395.48	12.4969	14	1438
53	254.508	395.662	12.4776	14	1473
54	254.072	395.755	12.7623	14	1502
55	255.245	395.92	13.0018	14	1532
56	256.262	396.24	12.9677	14	1563
57	258.399	397.357	12.863	14	1593
58	258.425	397.606	12.3972	14	1625
59	257.083	396.814	12.9951	14	1654
60	255.767	396.419	13.0591	14	1686
61	256.071	396.672	13.0737	14	1717
62	256.054	396.633	13.1914	14	1750
63	256.061	396.526	13.1532	14	1780
64	256.651	396.704	13.0559	14	1811
65	256.072	396.627	13.2749	14	1842
66	254.54	396.277	13.1708	14	1873
67	252.617	396.658	12.595	14	1902
68	251.456	396.754	12.4196	14	1931
69	252.356	396.656	12.4562	14	1962
70	252.835	396.567	12.6533	14	1992
71	252.037	396.767	12.4902	14	2021
72	251.765	396.635	12.2759	14	2048
73	251.018	396.618	12.2804	14	2076
74	251.998	396.376	12.2599	14	2104
75	251.369	396.417	12.2218	14	2133
76	250.41	396.723	11.9781	14	2161
77	250.092	396.329	11.5752	14	2189
78	250.938	396.257	11.8476	14	2217
79	251.9	395.99	12.1593	14	2247
80	250.968	395.857	11.9667	14	2277
81	250.792	395.717	12.3219	14	2306
82	249.875	396.521	11.8103	14	2335
83	249.29	397.347	11.2478	14	2363
84	250.103	397.341	11.7039	14	2394
85	249.605	397.466	11.3889	14	2425
86	249.084	397.55	11.2379	14	2452
87	249.076	397.253	11.4252	14	2483
88	248.857	396.98	11.3848	14	2515
89	249.44	397.212	11.6042	14	2540
90	249.264	397.774	11.3344	14	2572
91	250.439	397.222	12.0778	14	2603
92	250.561	397.198	12.2105	14	2632
93	249.769	397.002	11.9069	14	2661
94	249.295	397.718	11.6098	14	2689
95	250.099	397.505	12.4149	14	2719
96	250.433	397.98	12.3635	14	2750
97	250.599	398.072	12.3972	14	2779
98	250.697	398.274	12.4003	14	2809
99	250.816	398.107	12.3157	14	2841
100	250.822	398.718	12.111	14	2871
101	251.098	399.41	12.5451	14	2901
102	250.447	399.241	11.9626	14	2929
103	251.786	398.055	12.6449	14	2958
104	250.823	399.166	11.9201	14	2986
105	251.325	399.625	11.8477	14	3015
106	250.809	399.653	12.0962	14	3045
107	250.78	398.954	12.1302	14	3075
108	251.107	398.337	12.604	14	3105
109	250.84	398.915	12.2649	14	3135
110	250.83	398.423	12.0948	14	3165
111	250.64	398.893	11.9599	14	3195
112	250.546	398.032	12.0938	14	3225
113	250.149	398.284	12.0481	14	3254
114	250.259	397.936	12.0104	14	3284
115	250.496	398.726	12.2407	14	3313
116	249.205	403.147	10.7838	14	3341
117	238.477	410.579	11.0654	14	3369
118	240.14	410.5	10.1164	14	3396
119	240.743	410.463	9.68471	14	3425
120	240.915	410.645	9.59848	14	3454
121	240.429	410.596	9.86918	14	3482
122	240.762	410.384	9.48096	14	3511
123	241.312	410.32	9.50089	14	3541
124	241.699	410.25	9.19906	14	3569
125	241.054	410.292	9.33332	14	3599
126	240.255	410.118	9.6927	14	3627
127	239.551	409.931	10.2207	14	3655
128	239.337	410.106	10.3715	14	3683
129	241.437	409.994	9.6946	14	3711
130	242.289	409.63	9.84356	14	3740
131	241.711	409.587	9.90483	14	3771
132	240.324	410.253	10.0802	14	3800
133	240.105	410.409	10.1681	14	3830
134	240.509	410.657	10.1137	14	3860
135	241.596	410.646	9.90758	14	3890
136	242.199	410.741	9.87024	14	3919
137	242.364	411.193	10.0844	14	3947
138	241.635	411.322	9.74064	14	3974
139	241.562	411.368	10.0893	14	4000
140	234.813	413.236	12.3756	14	4028
141	230.631	420.684	12.1664	14	4055
142	231.691	420.613	12.1616	14	4081
143	230.984	421.253	11.8871	14	4109
144	231.235	421.453	12.057	14	4135
145	231.25	421.279	12.2075	14	4164
146	231.616	421.254	12.0477	14	4191
147	232.406	421.086	11.5562	14	4217
148	232.686	421.01	12.0185	14	4246
149	237.75	422.532	11.0368	14	4272
150	238.245	422.794	10.5575	14	4300
151	233.538	421.019	11.6436	14	4326
152	232.706	420.812	12.0307	14	4352
153	232.255	420.6	11.8183	14	4377
154	233.499	420.805	11.5589	14	4400
155	234.68	420.601	11.6353	14	4424
156	233.305	420.573	11.4048	14	4448
157	232.565	420.237	11.8922	14	4473
158	231.934	420.561	12.0735	14	4495
159	231.988	420.28	11.6849	14	4517
160	235.379	420.82	11.0116	14	4540
161	235.266	420.699	11.0087	14	4563
162	235.619	420.542	11.0635	14	4586
163	232.861	419.79	12.0131	14	4611
164	232.149	420.27	12.0001	14	4635
165	232.668	419.893	12.1083	14	4659
166	235.351	420.409	11.1551	14	4681
167	237.632	421.53	10.5616	14	4703
168	237.381	421.787	10.693	14	4725
169	235.848	420.685	11.23	14	4748
170	237.619	421.456	10.2854	14	4770
171	236.41	420.72	10.7329	14	4790
172	236.133	420.574	10.7283	14	4812
173	237.44	421.044	10.3742	14	4834
174	236.903	420.625	10.8235	14	4856
175	237.196	420.944	10.8035	14	4877
176	237.237	421.106	10.5023	14	4899
177	237.191	420.766	10.5653	14	4920
178	236.775	420.587	10.8024	14	4945
179	236.961	420.788	11.1801	14	4967
180	236.382	420.633	11.5335	14	4991
181	234.661	420.195	12.0449	14	5016
182	233.72	420.44	12.438	14	5040
183	234.179	420.673	12.4369	14	5062
184	236.457	420.985	12.1665	14	5085
185	237.447	421.51	11.9833	14	5110
186	236.531	421.297	12.2437	14	5134
187	235.952	421.159	12.3047	14	5158
188	234.867	421.172	12.6538	14	5182
189	234.863	421.037	12.4793	14	5205
190	236.098	421.623	12.3314	14	5229
191	233.472	421.639	12.9464	14	5253
192	233.879	421.318	12.8532	14	5277
193	233.808	421.35	12.8859	14	5300
194	232.632	421.475	12.8846	14	5326
195	229.745	422.55	13.4943	14	5352
196	229.568	422.634	13.6825	14	5376
197	228.26	423.72	14.7211	14	5408
198	223.439	429.611	16.4131	14	5432
1	315.776	474.723	10.0679	15	14
2	317.031	474.92	10.2192	15	38
3	316.203	474.403	10.203	15	63
4	315.331	474.233	9.92619	15	87
5	315.546	474.644	9.73525	15	113
6	316.223	474.528	9.06779	15	138
7	316.638	474.985	9.01474	15	166
8	316.173	475.375	8.96878	15	190
10	316.196	475.144	9.94913	15	243
11	315.951	475.227	9.91325	15	271
12	316.383	475.482	9.6701	15	297
13	317.029	475.594	9.17945	15	322
14	317.283	475.926	9.62733	15	355
15	317.242	475.873	9.86214	15	383
16	316.962	475.802	9.83405	15	411
17	316.543	475.479	9.69536	15	440
18	316.719	475.706	9.82924	15	470
19	317.063	475.827	8.74194	15	497
20	317.222	475.972	9.1161	15	527
21	316.797	475.606	8.51825	15	556
23	316.184	475.355	9.36681	15	615
24	315.94	475.032	9.16775	15	642
25	316.365	474.997	8.41144	15	670
26	316.851	475.16	8.73958	15	698
27	316.686	475.139	8.81304	15	728
28	316.441	474.929	8.51574	15	757
29	315.988	474.277	9.01779	15	784
30	315.839	474.498	9.62293	15	810
31	315.795	474.527	9.93269	15	836
32	315.862	475.305	9.99719	15	860
33	316.174	475.264	10.2969	15	887
34	316.533	475.019	9.83905	15	915
35	315.495	473.988	8.85901	15	945
36	313.886	472.341	8.55791	15	974
37	315.436	474.206	10.167	15	1002
38	315.118	473.923	9.88411	15	1032
39	315.515	474.211	9.9841	15	1062
40	316.278	475.035	9.83743	15	1091
41	316.228	475.193	9.58011	15	1119
42	316.493	474.722	10.1653	15	1150
43	315.715	474.886	10.4294	15	1180
44	315.345	474.373	9.88565	15	1208
45	315.471	474.358	9.82925	15	1239
46	316.447	474.698	9.83653	15	1268
47	316.858	474.743	9.7398	15	1298
48	317.01	475.035	9.50197	15	1325
49	316.484	475.024	9.85295	15	1354
50	316.87	475.246	10.5953	15	1384
51	316.35	475.151	10.3973	15	1415
52	316.745	475.135	10.6192	15	1443
53	317.176	475.472	10.5341	15	1472
54	318.017	475.868	10.1996	15	1501
55	318.238	475.834	10.5017	15	1530
56	317.724	475.945	10.3451	15	1562
57	317.451	475.644	10.4705	15	1592
58	317.77	476.194	11.0199	15	1624
59	318.638	476.77	10.2422	15	1653
60	318.951	476.894	10.9471	15	1685
61	319.277	477.146	10.9056	15	1716
62	319.054	476.888	10.915	15	1749
63	318.255	476.654	10.5105	15	1779
64	318.009	476.414	10.6524	15	1810
65	317.772	476.257	10.8354	15	1841
66	318.069	476.417	11.2075	15	1872
67	318.319	476.436	10.6398	15	1905
68	318.165	476.451	10.4289	15	1934
69	317.868	476.043	10.4966	15	1965
70	317.142	475.481	11.2489	15	1995
71	317.125	475.884	10.5495	15	2024
72	317.87	475.916	11.0466	15	2051
73	317.697	475.776	10.7381	15	2079
74	318.146	475.937	10.6542	15	2107
75	318.636	476.318	10.592	15	2136
76	317.101	475.334	10.2143	15	2164
77	316.733	475.108	10.5915	15	2192
78	316.317	474.479	10.3867	15	2220
79	316.676	474.913	10.8536	15	2250
80	316.883	475.121	10.6503	15	2280
81	317.201	474.988	10.3103	15	2309
82	317.427	475.216	10.533	15	2338
83	316.371	474.525	10.0662	15	2367
84	316.858	474.909	10.4843	15	2397
85	316.919	474.826	10.6901	15	2428
86	317.675	475.458	10.2248	15	2456
87	317.088	475.082	10.5051	15	2485
88	317.309	475.037	10.106	15	2518
89	316.902	474.518	9.93093	15	2543
90	316.502	474.513	10.2832	15	2575
91	316.313	474.532	10.5701	15	2605
92	316.39	474.348	10.3677	15	2634
93	317.271	474.956	10.3102	15	2663
94	317.367	475.268	10.3117	15	2692
95	317.682	475.655	10.5263	15	2721
96	317.963	475.716	10.9469	15	2752
97	317.766	475.574	10.7655	15	2781
98	316.451	473.762	10.483	15	2811
99	315.901	473.151	10.433	15	2843
100	316.386	473.158	9.18838	15	2873
101	316.25	472.281	9.66569	15	2903
102	315.964	471.863	9.9759	15	2931
103	316.283	472.565	9.8661	15	2960
104	315.94	472.088	10.0577	15	2988
105	316.033	472.518	10.1365	15	3017
106	316.64	473.798	10.1707	15	3047
107	317.769	474.978	10.7316	15	3077
108	318.617	476.282	10.7347	15	3107
109	317.982	475.654	10.9084	15	3137
110	317.712	475.85	10.7541	15	3167
111	316.993	475.152	10.4219	15	3197
112	317.259	475.475	10.9759	15	3227
113	318.124	475.623	10.4046	15	3256
114	317.981	475.682	10.8569	15	3285
115	318.234	475.536	10.7547	15	3315
116	317.483	474.924	10.4749	15	3344
117	317.235	475.087	10.5782	15	3372
118	317.204	475.141	11.0107	15	3398
119	317.29	475.016	11.1767	15	3428
120	317.709	475.467	10.859	15	3456
121	317.966	475.067	10.9149	15	3485
122	317.489	475.027	10.6886	15	3514
123	317.074	474.581	10.518	15	3543
124	316.643	474.199	10.5814	15	3572
125	316.511	474.173	10.5664	15	3601
126	316.856	474.376	10.5106	15	3629
127	317.349	475.02	10.8179	15	3657
128	317.387	473.796	10.7676	15	3685
129	316.828	474.179	10.521	15	3713
130	316.96	473.747	10.6512	15	3742
131	316.498	472.973	10.555	15	3773
132	316.882	473.644	10.8093	15	3802
133	317.388	474.277	11.1606	15	3832
134	317.811	474.932	11.1133	15	3863
135	317.842	474.835	11.4287	15	3893
136	317.453	474.366	10.8459	15	3922
137	317.771	475.626	11.497	15	3950
138	317.779	475.738	11.682	15	3976
139	317.578	475.451	12.1183	15	4003
140	318.206	476.53	12.7325	15	4030
141	318.529	476.592	12.3576	15	4056
142	319.017	476.508	11.854	15	4082
144	318.568	476.641	11.9439	15	4136
145	318.33	476.436	11.8058	15	4165
146	318.413	476.659	12.036	15	4192
147	318.933	477.013	11.7302	15	4219
148	318.908	476.707	11.6512	15	4247
149	318.21	476.505	11.5531	15	4274
150	318.346	476.792	11.31	15	4302
151	318.561	476.405	11.6263	15	4328
152	317.716	476.035	11.5156	15	4353
153	318.218	476.358	11.6642	15	4378
154	317.971	476.032	10.8949	15	4402
155	318.44	476.295	11.096	15	4426
156	318.074	475.721	10.8432	15	4450
158	317.448	474.918	11.1078	15	4496
159	317.421	475.099	11.3547	15	4519
160	317.755	475.171	11.2794	15	4542
161	318.41	475.928	10.9816	15	4565
162	318.542	475.93	11.325	15	4588
163	316.815	474.437	11.666	15	4612
164	317.148	474.482	10.9249	15	4636
165	317.906	475.124	11.2156	15	4660
166	317.055	474.761	11.4559	15	4683
167	317.491	475.033	11.484	15	4705
168	318.27	475.678	11.4315	15	4727
169	318.353	475.751	11.3524	15	4750
171	317.434	475.094	11.3701	15	4792
172	317.429	475.463	11.8774	15	4814
173	317.065	475.077	12.2653	15	4836
174	317.468	475.269	12.2322	15	4858
175	317.944	476.347	11.7437	15	4879
176	318.129	475.853	11.6008	15	4901
177	327.203	496.344	8.33946	15	4923
178	315.953	472.772	10.9076	15	4947
179	315.519	472.848	11.0902	15	4970
180	316.577	473.492	11.4979	15	4994
181	317.662	474.301	11.894	15	5018
182	317.872	474.254	11.4322	15	5041
183	318.069	474.262	11.5269	15	5064
184	317.444	474.119	11.4043	15	5087
185	318.473	475.712	12.7649	15	5112
186	318.57	475.847	12.3891	15	5136
187	318.455	475.897	12.4921	15	5160
188	318.68	476.324	11.9105	15	5183
189	318.499	475.706	12.6431	15	5207
190	320.116	477.609	12.6506	15	5231
192	320.262	478.015	12.8666	15	5279
193	320.25	477.811	12.524	15	5302
194	320.018	477.848	12.4461	15	5328
195	319.731	476.992	12.0405	15	5354
196	320.007	477.132	12.1577	15	5378
197	319.701	477.045	12.3235	15	5402
198	319.628	476.977	12.2006	15	5426
199	319.54	476.996	12.5505	15	5451
200	319.597	476.913	12.4765	15	5473
201	319.739	476.772	12.1642	15	5495
202	319.23	476.012	12.1855	15	5518
203	319.442	476.443	12.0824	15	5541
204	319.203	476.474	12.0546	15	5564
205	318.878	476.176	12.3199	15	5590
206	318.122	474.855	11.786	15	5613
207	317.045	473.453	11.4142	15	5633
208	317.108	473.225	11.2387	15	5657
209	316.765	473	11.0448	15	5683
210	316.643	472.879	10.8208	15	5708
211	316.678	472.807	11.0151	15	5732
212	316.248	472.711	11.182	15	5755
213	316.079	472.963	11.4078	15	5778
214	316.864	473.728	11.4787	15	5799
215	318.733	475.41	12.3987	15	5823
216	318.937	475.859	12.3231	15	5846
217	318.585	475.146	12.0203	15	5869
218	318.512	475.232	12.2612	15	5892
219	318.348	474.734	12.5021	15	5915
220	318.061	474.787	12.3282	15	5937
221	318.838	475.43	12.2002	15	5959
222	318.705	475.449	12.1478	15	5981
223	318.907	475.702	12.1	15	6002
225	318.995	476.053	12.722	15	6043
226	318.783	476.015	12.5198	15	6065
227	318.831	476.226	13.0904	15	6087
228	319.218	476.642	12.8753	15	6109
229	319.854	476.796	12.7701	15	6130
231	319.592	477.038	12.6341	15	6170
232	318.989	476.121	12.3864	15	6191
233	318.966	476.133	12.548	15	6211
234	318.967	476.493	12.8287	15	6233
1	475.128	318.543	13.2831	16	15
2	474.929	318.508	13.0476	16	39
3	474.999	318.631	12.9176	16	64
4	474.627	317.811	12.9828	16	88
5	475.08	318.311	12.9625	16	114
6	475.16	317.709	12.7778	16	140
7	475.13	317.898	13.287	16	167
8	475.436	318.663	13.5102	16	192
9	475.61	319.055	13.3574	16	218
10	475.706	319.315	13.3606	16	244
11	475.417	318.752	13.4694	16	272
12	475.549	319.363	13.8236	16	298
13	475.858	319.525	13.8333	16	325
14	475.958	320.396	13.4556	16	356
15	476.17	320.239	13.6383	16	384
16	476.158	320.885	13.4241	16	412
17	476.067	320.721	13.5512	16	441
18	476.073	320.318	13.1184	16	471
19	476.297	319.933	13.282	16	499
20	476.076	320.282	13.2794	16	529
21	476.235	320.301	13.315	16	558
22	475.757	320.283	13.1031	16	587
23	475.458	320.247	12.9492	16	616
24	475.664	319.703	12.8831	16	644
25	475.818	319.417	13.1885	16	672
26	475.589	319.24	13.3009	16	700
27	475.765	319.334	13.4854	16	730
28	475.476	319.543	13.5854	16	758
29	475.549	320.079	13.3582	16	785
30	475.609	319.363	13.5944	16	811
31	475.821	320.288	13.4084	16	837
32	479.817	321.958	14.1914	16	861
33	489.233	320.713	16.0445	16	896
34	484.605	300.348	15.8134	16	924
35	479.132	303.81	18.0786	16	953
36	479.945	302.977	17.3348	16	983
37	480.623	302.259	17.9212	16	1012
38	478.671	303.748	18.2541	16	1041
39	478.581	303.45	19.1415	16	1070
40	478.025	303.227	19.3489	16	1099
41	478.164	303.232	18.9906	16	1128
42	478.038	303.015	18.9183	16	1157
43	477.911	303.175	19.1716	16	1188
44	477.755	303.161	18.8827	16	1218
45	479.507	292.168	25.5	16	1246
46	480.996	290.619	25.5	16	1276
47	480.486	290.895	25.5	16	1306
48	479.714	291.86	25.5	16	1336
49	480.737	291.345	25.5	16	1365
50	482.522	290.607	25.5	16	1396
51	484.195	289.104	25.5	16	1426
52	483.858	289.771	25.5	16	1455
53	481.395	292.315	25.5	16	1485
54	480.602	292.38	25.5	16	1515
[truncated: 4,244 more rows]
