# Supplementary material for: Functional visualization of NK cell-mediated killing of metastatic single tumor cells
Source: eLife journal article supplement (doi:10.7554/elife.76269), 2022-02-03
Supplement: supp [file nk_pos_4.xlsx]

## Sheet: Sheet1
1	94.2365	100.099	5.5	1	0
2	94.1681	100.042	5.5	1	51
3	94.6481	99.5265	5.5	1	103
4	87.7029	105.145	5.5	1	158
5	87.7935	104.734	5.5	1	215
6	91.13	101.252	5.5	1	272
7	86.7866	104.115	5.5	1	330
8	89.1524	103.204	5.5	1	392
9	89.3461	102.85	5.5	1	458
10	89.6884	102.315	5.5	1	526
11	88.8142	104.627	5.5	1	599
12	88.5233	105.664	5.5	1	673
13	88.8159	106.083	5.5	1	752
14	88.5077	105.092	5.5	1	834
15	89.8182	101.616	5.5	1	916
16	88.5354	103.207	5.5	1	1001
17	88.4628	105.88	5.5	1	1086
18	88.7356	105.484	5.5	1	1174
19	89.7258	101.652	5.5	1	1263
20	84.9369	103.486	5.5	1	1353
21	84.0252	103.341	5.5	1	1445
22	87.941	103.12	5.5	1	1540
23	93.5904	99.8148	5.5	1	1635
24	94.1166	99.5315	5.5	1	1729
25	88.9942	104.964	5.5	1	1826
26	89.4364	105.376	5.5	1	1924
27	89.3668	105.358	5.5	1	2018
28	89.6142	105.899	5.5	1	2110
29	89.8227	105.332	5.5	1	2202
30	90.0512	106.53	5.5	1	2294
31	90.2302	107.421	5.5	1	2385
32	90.0439	107.23	5.5	1	2476
33	90.1478	106.246	5.5	1	2569
34	94.6686	100.432	6.89609	1	2666
35	95.4246	99.6972	7.50979	1	2754
36	95.0938	99.7925	7.44593	1	2841
37	94.882	99.7089	7.01737	1	2930
38	94.7375	99.7438	7.30487	1	3019
39	94.8023	99.8587	7.34691	1	3108
40	94.8543	99.6676	7.72108	1	3197
41	94.7648	99.5432	7.27687	1	3286
42	94.9027	99.384	7.29397	1	3371
43	94.7167	99.5681	7.77798	1	3457
44	94.98	99.2688	7.60824	1	3542
45	94.601	99.4276	7.62601	1	3626
46	94.8375	99.1426	7.61056	1	3709
47	94.6572	99.0634	7.70587	1	3790
48	94.6355	99.0716	7.64546	1	3872
49	94.7322	98.9447	7.83468	1	3956
50	94.64	98.9757	8.01467	1	4041
51	94.4266	98.7731	7.20177	1	4128
52	95.6664	98.3212	7.96558	1	4212
53	99.2557	94.846	9.36091	1	4295
54	109.949	78.0747	7.94042	1	4374
55	109.174	78.5254	8.65245	1	4453
56	88.0522	48.7678	15.0538	1	4570
1	57.3858	142.56	5.5	2	1
2	57.4008	142.326	5.5	2	52
3	57.3724	142.656	5.5	2	104
4	57.1219	142.236	5.5	2	159
5	57.1878	142.284	5.5	2	216
6	57.1429	142.13	5.5	2	273
7	57.1587	142.168	5.5	2	331
8	57.1753	142.132	5.5	2	393
9	57.1304	141.953	5.5	2	459
10	56.9592	141.951	5.5	2	527
11	57.1396	141.793	5.5	2	600
12	57.0776	141.47	5.5	2	675
13	57.0862	141.469	5.5	2	754
14	57.0502	141.565	5.5	2	836
15	57.1415	141.884	5.5	2	917
16	56.9195	141.71	5.5	2	1002
17	56.9322	141.653	5.5	2	1087
18	56.8828	141.249	5.5	2	1175
19	57.0378	140.942	5.5	2	1264
20	57.0582	140.649	5.5	2	1354
21	57.1057	140.794	5.5	2	1446
22	57.6266	137.133	5.5	2	1542
23	57.7515	134.999	5.5	2	1637
24	57.6646	137.305	5.5	2	1731
25	57.7656	142.826	5.5	2	1828
26	57.8573	142.475	5.5	2	1926
27	58.0378	142.916	5.5	2	2020
28	58.1371	142.849	5.5	2	2111
29	58.2788	143.08	5.5	2	2203
30	58.4672	143.525	5.5	2	2295
31	58.3397	143.626	5.5	2	2386
32	58.2405	143.412	5.5	2	2477
33	58.3652	142.989	5.5	2	2570
34	58.3308	142.706	5.5	2	2661
35	58.182	142.366	5.5	2	2748
36	57.8962	142.627	5.5	2	2835
37	57.6906	141.453	5.5	2	2924
38	57.5348	141.582	5.5	2	3013
39	57.864	140.187	5.5	2	3103
40	57.6037	140.947	5.5	2	3192
41	57.5554	141.452	5.5	2	3281
42	57.5002	141.198	5.5	2	3366
43	57.4658	141.052	5.5	2	3452
44	57.4428	141.785	5.5	2	3536
45	57.4024	141.718	5.5	2	3620
46	57.3727	141.57	5.5	2	3703
47	57.4932	141.256	5.5	2	3785
48	57.3991	141.944	5.5	2	3867
49	57.4018	142.074	5.5	2	3951
50	57.4751	142.214	5.5	2	4037
51	57.3035	142.299	5.5	2	4123
52	57.4568	141.7	5.5	2	4207
53	57.4364	142.075	5.5	2	4291
54	57.4178	142.354	5.5	2	4370
55	57.1507	141.78	5.5	2	4450
56	57.4919	141.73	5.5	2	4526
57	57.3182	142.391	5.5	2	4604
58	57.4944	141.788	5.5	2	4682
59	57.0938	141.337	5.5	2	4757
60	57.2382	141.449	5.5	2	4832
61	57.4736	141.573	7.15435	2	4908
62	57.4517	141.739	6.96955	2	4979
63	57.6771	142.31	6.96675	2	5052
64	57.6395	142.509	7.1836	2	5125
65	58.1476	141.92	7.00128	2	5198
66	58.1469	142.44	7.06976	2	5273
67	61.4675	151.627	12.6994	2	5349
1	154.839	174.353	5.5	3	2
2	154.806	174.339	5.5	3	53
3	154.515	174.805	5.5	3	105
4	154.448	175.108	5.5	3	160
5	153.824	174.872	5.5	3	217
6	153.632	174.862	5.5	3	274
7	154.185	174.731	5.5	3	332
8	154.295	174.829	5.5	3	394
9	154.392	173.499	5.5	3	460
10	154.008	173.491	5.5	3	528
11	153.6	173.401	5.5	3	601
12	152.866	174.14	5.5	3	676
13	154.118	173.553	5.5	3	756
14	154.54	172.859	5.5	3	837
15	153.824	173.411	5.5	3	918
16	152.768	173.54	5.5	3	1003
17	153.273	173.189	5.5	3	1088
18	153.989	172.594	5.5	3	1176
19	154.008	172.67	5.5	3	1265
20	153.302	172.704	7.12036	3	1358
21	153.083	172.501	7.45999	3	1451
22	152.651	172.833	7.37849	3	1546
23	153.651	173.499	6.88888	3	1641
24	153.327	173.555	7.41568	3	1736
25	153.95	173.58	7.3761	3	1833
26	154.309	174.139	7.90116	3	1931
27	154.437	175.275	7.6588	3	2025
28	155.394	174.604	7.65135	3	2116
29	153.917	174.037	7.73091	3	2209
30	152.928	173.635	8.53039	3	2301
31	154.239	174.081	8.04688	3	2392
32	155.161	174.501	7.67869	3	2483
33	154.717	174.626	7.83612	3	2576
34	151.683	167.013	12.6916	3	2670
35	150.941	169.643	11.2035	3	2757
36	144.812	172.009	12.6009	3	2846
37	142.202	176.982	13.1432	3	2934
38	142.256	176.564	12.8735	3	3025
39	142.734	171.982	12.5653	3	3114
40	144.251	170.844	12.5031	3	3203
41	141.23	170.267	11.2459	3	3289
42	136.964	168.13	11.3763	3	3373
43	129.477	165.777	10.4838	3	3460
44	121.649	165.274	5.5	3	3537
45	121.411	165.559	5.5	3	3621
46	121.653	166.052	5.5	3	3704
47	114.412	176.973	9.96964	3	3792
48	99.8297	194.419	10.2082	3	3873
49	86.8128	198.52	9.41011	3	3958
50	86.5962	202.002	8.29059	3	4042
51	84.6321	207.125	5.5	3	4125
52	84.5288	205.894	5.5	3	4209
1	155.18	194.777	5.5	4	3
2	154.988	194.133	5.5	4	54
3	155.449	194.628	5.5	4	106
4	155.986	195.309	5.5	4	161
5	156.164	195.513	5.5	4	218
6	156.272	195.496	5.5	4	275
8	171.439	205.711	5.5	4	396
9	170.705	217.297	5.5	4	463
10	170.488	217.555	5.5	4	531
11	170.026	216.94	5.5	4	604
12	170.62	216.608	5.5	4	679
13	170.62	217.284	5.5	4	758
14	171.871	224.411	5.5	4	839
15	168.493	223.688	5.5	4	921
16	168.817	223.336	5.5	4	1006
17	171.978	225.388	5.5	4	1091
18	172.381	225.676	5.5	4	1179
19	171.72	224.868	5.5	4	1268
20	172.689	226.188	5.5	4	1357
21	172.396	232.419	5.5	4	1449
22	175.277	233.704	5.5	4	1545
23	174.269	234.506	5.5	4	1640
24	173.132	235.014	5.5	4	1735
25	172.68	235.089	5.5	4	1832
26	167.879	244.917	5.5	4	1930
27	152.183	249.959	5.5	4	2024
28	152.043	249.161	5.5	4	2115
29	153.219	248.696	5.5	4	2207
30	153.306	247.952	5.5	4	2299
31	152.954	249.403	5.5	4	2390
32	154.74	250.877	5.5	4	2481
33	152.884	249.731	5.5	4	2574
34	152.82	249.914	5.5	4	2665
35	154.109	250.71	5.5	4	2752
36	153.396	249.099	5.5	4	2839
37	152.954	247.493	5.5	4	2928
38	153.221	249.591	5.5	4	3017
39	152.538	248.606	5.5	4	3107
40	152.558	248.832	5.5	4	3196
41	152.948	249.813	5.5	4	3285
42	149.937	248.784	5.5	4	3370
43	151.726	247.904	5.5	4	3456
44	151.79	247.406	5.5	4	3541
45	152.774	248.23	5.5	4	3625
46	152.098	248.4	5.5	4	3708
47	152.028	248.47	5.5	4	3789
48	154.187	250.045	5.5	4	3871
49	153.498	249.22	5.5	4	3955
50	152.445	246.939	5.5	4	4040
51	153.378	248.459	5.5	4	4127
52	153.418	248.745	5.5	4	4211
53	153.535	249.162	5.5	4	4294
54	153.304	250.169	5.5	4	4373
55	146.669	251.888	9.94093	4	4454
56	145.812	252.462	9.47888	4	4529
57	146.022	252.094	9.60236	4	4607
58	146.725	251.022	9.43994	4	4685
1	171.738	206.851	5.5	5	4
2	169.454	205.712	5.5	5	55
3	162.375	203.453	5.5	5	107
4	159.604	203.875	5.5	5	162
5	159.039	204.647	5.5	5	219
6	161.705	201.961	5.5	5	276
7	161.944	201.832	5.5	5	333
8	155.49	194.37	5.5	5	395
9	155.365	194.317	5.5	5	461
10	155.593	194.357	5.5	5	529
11	155.246	194.146	5.5	5	602
12	155.37	194.234	5.5	5	677
13	155.276	194.127	5.5	5	757
14	155.092	193.778	5.5	5	838
15	155.465	193.921	5.5	5	920
16	155.27	193.95	5.5	5	1004
17	155.042	193.678	5.5	5	1089
18	154.781	193.472	5.5	5	1177
19	155.034	193.427	5.5	5	1266
20	155.068	193.388	5.5	5	1355
21	154.668	193.957	5.5	5	1447
22	154.959	193.933	5.5	5	1543
23	155.771	194.741	5.5	5	1638
24	156.156	194.639	5.5	5	1732
25	156.255	194.573	5.5	5	1829
26	156.371	194.988	5.5	5	1927
27	156.579	195.628	5.5	5	2021
28	156.93	195.564	5.5	5	2112
29	157.175	195.706	5.5	5	2204
30	162.491	193.033	5.5	5	2296
31	158.141	195.163	5.5	5	2387
32	156.155	195.231	5.5	5	2478
33	155.776	195.072	5.5	5	2572
34	155.675	194.603	5.5	5	2663
35	155.812	195.003	5.5	5	2749
36	156.079	194.797	5.5	5	2836
37	156.408	195.301	5.5	5	2925
38	156.198	194.906	5.5	5	3014
39	156.021	194.998	5.5	5	3104
40	156.203	195.179	5.5	5	3193
41	156.239	194.8	5.5	5	3282
42	156.186	194.88	5.5	5	3367
43	156.73	194.939	5.5	5	3453
44	156.521	195.597	5.5	5	3539
45	156.391	195.654	5.5	5	3623
46	156.278	195.02	5.5	5	3706
47	156.233	194.956	5.5	5	3786
48	156.358	194.607	5.5	5	3868
49	156.785	194.881	5.5	5	3952
50	156.947	194.983	5.5	5	4038
51	155.664	194.379	5.5	5	4124
52	155.726	194.113	5.5	5	4208
53	153.929	192.537	5.5	5	4292
54	154.794	193.759	5.5	5	4371
55	155.238	194.785	5.5	5	4451
56	155.583	194.647	5.5	5	4527
57	155.839	194.305	5.5	5	4605
58	155.978	194.581	5.5	5	4683
59	156.092	194.653	5.5	5	4758
60	155.994	194.605	5.5	5	4833
61	155.808	194.309	5.5	5	4906
62	155.826	194.676	5.5	5	4977
63	156.054	194.868	5.5	5	5050
64	156.026	194.975	5.5	5	5123
65	156.309	195.2	5.5	5	5195
66	156.784	195.444	5.5	5	5270
67	156.376	195.278	5.5	5	5345
68	156.809	195.529	5.5	5	5420
69	156.837	195.32	5.5	5	5489
70	156.857	195.514	5.5	5	5559
71	156.974	195.684	5.5	5	5629
72	156.92	195.516	5.5	5	5697
73	156.816	195.456	5.5	5	5768
74	155.999	194.535	5.5	5	5836
75	156.527	195.573	5.5	5	5905
76	156.21	194.863	5.5	5	5975
77	156.858	195.69	5.5	5	6044
78	157.86	195.923	5.5	5	6112
79	157.606	195.709	5.5	5	6184
80	157.084	195.243	5.5	5	6253
81	156.456	195.222	5.5	5	6324
82	156.439	194.723	5.5	5	6396
83	156.208	194.871	5.5	5	6467
84	156.305	195.148	5.5	5	6541
85	156.399	195.003	5.5	5	6615
86	156.25	194.999	5.5	5	6691
87	155.822	194.568	5.5	5	6767
88	155.741	194.536	5.5	5	6844
89	155.677	194.17	5.5	5	6918
90	155.665	193.966	5.5	5	6994
91	155.855	194.82	5.5	5	7067
92	155.955	194.736	5.5	5	7141
93	156.224	194.686	6.84864	5	7220
94	156.18	194.523	6.89698	5	7297
95	155.86	194.193	6.86018	5	7372
96	155.917	194.239	7.00123	5	7448
97	156.1	194.328	7.20137	5	7523
98	156.632	194.659	6.87969	5	7597
99	157.207	195.7	6.81782	5	7671
100	156.903	195.53	7.66286	5	7744
101	157.042	195.15	7.70759	5	7811
102	156.765	195.095	7.88583	5	7882
103	156.624	195.17	7.73882	5	7951
104	157.049	195.416	7.53027	5	8020
105	157.255	195.412	7.21256	5	8088
106	157.444	195.633	7.60137	5	8154
107	157.685	195.964	7.70718	5	8216
108	157.521	195.72	7.85828	5	8279
109	157.607	195.706	7.80645	5	8343
110	157.178	195.579	6.85132	5	8406
111	157.237	195.029	7.56197	5	8470
112	157.096	194.758	7.8255	5	8532
113	157.017	194.825	7.40381	5	8597
114	157.171	194.753	7.30213	5	8658
115	156.953	194.513	7.82935	5	8721
116	156.853	194.389	7.7239	5	8785
117	156.495	194.169	7.87999	5	8851
118	157.035	194.475	7.57637	5	8914
119	157.082	194.666	7.40536	5	8979
120	156.729	194.323	7.83498	5	9043
121	156.642	194.059	7.85663	5	9106
122	156.689	193.832	7.90067	5	9168
123	156.687	193.441	7.8549	5	9229
124	156.843	193.941	7.35646	5	9291
125	156.825	193.992	7.34692	5	9349
126	156.827	193.981	7.55894	5	9407
127	156.692	193.806	7.78486	5	9464
128	156.955	193.679	7.92879	5	9521
129	156.095	193.164	7.86072	5	9578
130	155.969	193.142	7.99096	5	9633
131	156.132	192.904	7.80753	5	9689
132	155.964	193.107	7.79679	5	9745
133	156.156	193.513	8.04354	5	9801
134	157.143	193.915	7.99771	5	9856
135	157.785	193.649	8.1137	5	9911
136	157.544	194.527	8.16675	5	9964
137	157.311	194.441	8.32369	5	10016
138	156.952	194.526	8.5462	5	10068
1	217.14	16.8363	9.9334	6	5
2	216.662	17.439	9.69401	6	56
3	217.062	17.7181	9.82515	6	110
4	216.995	17.5156	10.0061	6	165
5	217.167	17.0305	10.1081	6	221
6	217.018	16.449	9.98101	6	279
7	216.753	16.9421	9.92619	6	336
8	216.351	16.5454	9.79649	6	399
9	216.133	16.5402	9.77488	6	464
10	216.623	16.5116	10.0222	6	532
11	216.85	16.5857	10.4335	6	605
12	216.655	15.9193	10.4416	6	681
13	216.62	16.0947	10.5671	6	761
14	216.211	15.2737	10.0148	6	842
15	217.026	15.3888	9.81595	6	923
16	217.15	15.37	9.66604	6	1008
17	216.883	15.2824	10.4796	6	1094
18	216.774	15.3359	10.7997	6	1182
19	216.214	15.2121	11.0632	6	1271
20	216.047	15.9465	11.2758	6	1360
21	215.782	16.0816	11.222	6	1453
22	215.38	15.4032	11.052	6	1548
23	215.917	17.0465	11.0966	6	1643
24	216.81	16.7848	11.0088	6	1738
25	217.084	16.8856	10.9303	6	1836
26	217.16	16.6521	11.8207	6	1935
27	217.221	16.9452	11.9823	6	2029
28	217.016	17.2203	11.9998	6	2121
29	217.026	17.3165	11.504	6	2211
30	217.564	17.1621	11.1502	6	2302
31	217.789	16.942	11.3185	6	2393
32	218.244	16.6127	11.3651	6	2485
33	218.125	16.2996	11.3953	6	2577
34	217.956	16.3173	11.3326	6	2667
35	217.715	15.9303	11.1155	6	2755
36	217.281	16.2746	11.156	6	2842
37	217.399	15.6113	10.7646	6	2931
38	217.707	14.9378	10.9523	6	3020
39	218.674	14.8836	11.0334	6	3109
40	218.513	14.9811	11.1598	6	3198
41	217.412	16.3106	11.3498	6	3287
42	216.319	17.4536	11.9191	6	3376
43	216.664	18.2066	11.7064	6	3458
44	216.628	16.2777	11.4511	6	3543
45	216.203	16.8339	12.0855	6	3629
46	216.601	17.3025	12.3117	6	3711
47	216.473	16.91	12.1975	6	3794
48	216.258	17.7491	12.0962	6	3874
49	216.421	17.493	11.7069	6	3957
50	216.199	17.9147	11.9453	6	4043
51	216.489	16.7244	11.905	6	4130
52	216.826	17.298	12.2466	6	4213
53	216.161	16.7362	12.2707	6	4296
54	216.325	16.9615	12.3136	6	4375
55	216.676	19.3035	12.2046	6	4455
56	224.584	31.9068	12.519	6	4530
57	224.744	32.6352	12.8424	6	4608
58	225.053	43.207	13.4013	6	4686
59	225.518	41.3546	13.3578	6	4760
60	225.591	42.2976	13.6309	6	4835
61	225.045	43.7978	14.0064	6	4909
62	225.495	43.8066	13.9946	6	4980
63	225.409	43.1322	13.871	6	5053
64	224.379	32.07	13.2529	6	5126
65	223.727	28.9347	13.1424	6	5199
66	224.322	29.1839	13.4235	6	5274
67	223.6	28.0212	13.2343	6	5348
68	224.668	29.3443	13.7427	6	5422
69	223.698	29.6091	13.3007	6	5493
70	222.653	27.4506	12.9838	6	5562
71	222.586	26.9198	13.0114	6	5631
72	222.218	26.2875	13.0124	6	5701
73	223.653	27.0196	13.0064	6	5773
74	222.474	26.5424	12.822	6	5840
75	219.572	23.6244	12.9187	6	5909
76	219.758	24.4528	12.7311	6	5978
77	219.298	24.2956	12.9369	6	6047
78	219.831	24.4495	13.1486	6	6116
79	220.662	24.8598	13.1714	6	6188
80	221.305	25.1261	13.2363	6	6257
81	221.81	25.9628	13.5159	6	6328
82	223.43	28.1285	13.6976	6	6400
83	223.077	28.0827	13.3728	6	6471
84	221.659	26.3819	13.3752	6	6543
85	222.804	26.9671	13.3688	6	6618
86	222.059	25.9077	13.3207	6	6694
87	222.704	26.6628	13.484	6	6770
88	222.936	12.0431	15.2163	6	6884
89	222.77	12.2839	15.0836	6	6959
90	221.023	14.1222	15.441	6	7035
91	209.754	17.2228	18.1069	6	7110
92	202.258	17.8874	17.6078	6	7185
1	223.486	138.783	9.93967	7	6
2	220.954	137.902	9.33116	7	57
3	219.297	136.994	8.5465	7	109
4	219.256	136.936	8.97476	7	163
5	219.924	137.325	9.43902	7	222
6	218.118	135.913	8.72638	7	277
7	218.997	136.889	8.99705	7	335
8	219.002	136.9	9.02628	7	398
9	219.735	136.959	9.5088	7	465
10	221.178	137.392	10.125	7	533
11	221.509	137.281	10.1963	7	606
12	220.707	137.281	10.293	7	682
13	219.37	137.195	9.77971	7	762
14	219.517	136.861	9.77337	7	844
15	221.017	137.541	10.3272	7	924
16	221.133	137.467	10.3701	7	1009
17	219.718	137.115	10.2798	7	1095
18	219.436	137.043	10.0438	7	1184
19	219.941	136.931	10.3311	7	1272
20	220.827	137.445	10.4691	7	1362
21	220.687	137.627	10.7268	7	1454
22	219.883	137.633	10.385	7	1549
23	219.971	137.53	10.4417	7	1644
24	220.754	137.878	10.699	7	1739
25	220.791	137.983	10.7938	7	1837
26	220.523	137.928	10.8467	7	1934
27	221.525	138.445	11.0126	7	2027
28	222.116	138.509	10.9131	7	2118
29	223.703	139.057	11.3416	7	2212
30	224.099	139.127	11.4284	7	2303
31	224.152	139.121	11.7372	7	2394
32	222.845	138.879	11.2401	7	2486
33	222.191	138.918	11.5802	7	2578
34	222.769	138.761	11.5211	7	2668
35	220.952	138.239	10.8721	7	2756
36	220.961	138.323	10.9969	7	2843
37	220.801	138.218	10.9357	7	2932
38	221.734	138.464	11.2598	7	3021
39	222.412	138.655	11.3109	7	3110
40	222.143	138.784	11.7771	7	3202
41	221.158	138.436	11.455	7	3288
42	220.244	137.772	10.9055	7	3372
43	221.01	137.739	11.0385	7	3459
44	222.141	138.037	11.5241	7	3544
45	222.234	137.907	11.5879	7	3628
46	221.624	137.725	11.5089	7	3710
47	221.369	137.819	11.7016	7	3791
48	222.81	138.179	11.8804	7	3875
49	225.801	138.893	12.3198	7	3959
50	220.706	124.952	20.4927	7	4092
51	230.302	125.986	15.6559	7	4173
52	227.567	122.381	16.4769	7	4256
53	226.594	120.707	16.5383	7	4338
54	227.488	121.944	16.496	7	4419
55	217.778	129.777	25.5	7	4520
56	219.696	131.999	24.0689	7	4577
57	220.986	134.105	23.3144	7	4653
58	220.327	131.011	25.5	7	4752
1	111.571	180.578	10.7103	8	7
2	111.328	179.832	10.847	8	58
3	110.937	179.769	10.8087	8	111
4	111.194	180.154	10.9331	8	166
5	110.991	179.786	10.9245	8	223
6	110.287	179.641	11.3685	8	280
7	108.769	179.748	10.894	8	337
8	109.993	180.225	12.3669	8	400
9	109.907	180.21	12	8	466
10	109.652	179.935	12.6822	8	535
11	109.657	180.258	12.4334	8	608
12	109.565	180.281	12.6115	8	684
13	110.209	180.431	12.1218	8	764
14	110.223	180.1	11.8531	8	846
15	110.537	180.342	12.1535	8	928
16	110.952	180.726	11.4047	8	1010
17	111.236	180.919	11.334	8	1096
18	110.395	180.723	11.92	8	1186
19	109.771	180.561	12.3288	8	1275
20	110.268	180.516	12.2584	8	1365
21	110.251	180.461	12.4571	8	1457
22	110.651	180.639	12.5726	8	1551
23	110.611	180.789	12.8849	8	1646
24	110.884	181.456	12.2599	8	1741
25	110.596	181.279	12.889	8	1838
26	111.463	181.679	12.4614	8	1936
27	111.662	181.693	12.7781	8	2030
28	115.966	180.928	9.49309	8	2119
29	115.663	180.319	9.61754	8	2213
30	115.589	177.767	9.49587	8	2304
31	100.369	197.316	9.82578	8	2395
32	100.596	196.311	9.83803	8	2487
33	100.416	197.093	9.81518	8	2579
34	100.363	196.758	9.7012	8	2669
35	100.429	195.773	9.74129	8	2758
36	100.263	196.265	9.80461	8	2844
37	99.997	196.169	9.63033	8	2933
38	99.81	196.135	9.61599	8	3022
39	100.052	196.298	9.75968	8	3111
40	100.013	196.24	9.87444	8	3199
41	99.9497	196.254	9.87588	8	3290
42	99.7875	197.891	9.55698	8	3374
1	0	205.162	13.0308	9	8
3	21.3265	210.913	5.5	9	108
4	20.2972	203.011	7.90064	9	164
5	18.824	197.736	7.89301	9	220
6	20.9337	207.558	8.03093	9	278
7	21.688	211.278	5.5	9	334
8	24.9948	212.96	5.5	9	397
9	27.8011	216.383	5.5	9	462
10	26.5559	215.081	5.5	9	530
11	26.0047	214.352	5.5	9	603
12	27.1082	216.617	5.5	9	678
13	33.034	235.394	5.5	9	759
14	42.5445	241.809	10.303	9	845
15	41.9829	242.798	10.6757	9	925
16	43.1536	240.261	10.9099	9	1011
17	41.2589	237.586	5.5	9	1092
18	34.9602	237.613	5.5	9	1180
19	37.1061	239.701	5.5	9	1269
20	41.8795	243.045	10.7053	9	1363
21	42.0864	242.1	10.4042	9	1455
1	263.602	3.75645	5.5	10	9
2	263.883	0	5.5	10	59
3	263.784	0	5.5	10	112
4	263.608	0	5.5	10	167
5	263.804	2.89093	5.5	10	224
6	263.652	3.33051	5.5	10	281
7	263.477	3.27716	5.5	10	338
8	262.744	4.86806	5.5	10	401
9	262.838	5.11607	5.5	10	467
10	264.433	9.53331	5.5	10	536
11	269.085	12.3714	5.5	10	609
12	270.326	13.1287	5.5	10	685
13	273.972	18.2545	5.5	10	766
14	274.622	17.8586	5.5	10	847
15	275.092	17.9821	5.5	10	929
16	272.225	14.6177	5.5	10	1014
17	271.398	13.181	5.5	10	1099
18	273.545	16.6347	5.5	10	1188
19	273.972	17.778	5.5	10	1276
20	273.449	17.6665	5.5	10	1367
21	272.959	16.8017	5.5	10	1459
22	273.441	16.5791	5.5	10	1552
23	274.597	18.769	5.5	10	1647
24	276.016	22.9482	5.5	10	1742
25	278.449	28.4117	5.5	10	1839
26	283.033	31.5571	5.5	10	1938
27	289.996	27.0315	5.5	10	2031
28	291.33	26.0481	5.5	10	2124
29	289.339	27.9669	5.5	10	2216
30	289.234	28.4407	5.5	10	2306
31	290.051	28.0035	5.5	10	2397
32	289.343	28.5317	5.5	10	2488
33	291.987	25.9222	5.5	10	2580
34	294.857	21.6186	5.5	10	2671
35	298.084	12.4621	7.36306	10	2765
36	298.233	13.0458	7.24678	10	2852
37	297.703	11.5874	7.17361	10	2940
38	296.044	8.8135	7.68727	10	3032
39	295.214	5.85147	8.23217	10	3120
40	294.364	3.90812	8.71619	10	3209
41	293.999	1.14811	9.44534	10	3301
42	292.826	0	9.45772	10	3388
43	292.547	0	9.60724	10	3470
44	293.012	0	9.33501	10	3554
45	293.004	0	9.6316	10	3637
46	292.907	0	9.65481	10	3721
47	293.267	0	9.49525	10	3803
48	293.446	0	9.40138	10	3884
49	292.814	0	9.69147	10	3966
50	292.846	0	9.71855	10	4051
51	293.04	0	9.75385	10	4138
52	293.239	0	9.76321	10	4221
53	292.256	0	9.76873	10	4304
1	394.28	76.0202	5.5	11	10
2	393.733	76.3095	5.5	11	60
3	393.171	76.5222	5.5	11	113
4	396.108	74.6037	5.5	11	168
5	395.986	74.2984	5.5	11	225
6	396.255	73.8087	5.5	11	282
7	393.528	75.7013	5.5	11	339
8	393.336	75.8745	5.5	11	402
9	395.405	74.1454	5.5	11	468
10	394.042	75.033	5.5	11	537
11	394.317	74.7221	5.5	11	610
12	395.297	73.9027	5.5	11	686
13	395.53	73.7326	5.5	11	767
14	394.875	74.0709	5.5	11	848
15	395.672	73.4172	5.5	11	930
16	395.85	73.0913	5.5	11	1015
17	395.536	73.8131	5.5	11	1100
18	395.583	73.6815	5.5	11	1189
19	392.771	75.7469	5.5	11	1277
20	393.862	74.9449	5.5	11	1368
21	393.366	75.5476	5.5	11	1460
22	395.97	73.9376	5.5	11	1553
23	393.509	76.0309	5.5	11	1648
24	394.422	75.6512	5.5	11	1743
25	395.781	74.5374	5.5	11	1840
26	396.602	74.3984	5.5	11	1939
27	396.446	75.0325	5.5	11	2032
28	394.376	76.7494	5.5	11	2125
29	396.845	74.9529	5.5	11	2217
30	396.809	75.1521	5.5	11	2307
31	397.395	74.7206	5.5	11	2398
32	397.391	74.6091	5.5	11	2489
33	395.026	76.7432	5.5	11	2581
34	394.398	76.969	5.5	11	2672
35	393.841	77.0547	5.5	11	2760
36	394.02	76.9403	5.5	11	2848
37	393.153	77.0765	5.5	11	2936
38	395.803	75.0586	5.5	11	3027
39	396.641	74.886	5.5	11	3116
40	396.862	74.757	5.5	11	3205
41	396.738	74.5765	5.5	11	3294
42	394.462	76.4327	5.5	11	3381
43	396.84	74.3831	5.5	11	3464
44	396.627	74.2451	5.5	11	3549
45	396.65	74.0574	5.5	11	3633
46	396.573	74.2814	5.5	11	3715
47	396.699	74.2225	5.5	11	3797
48	396.738	73.9023	5.5	11	3878
49	394.532	75.6027	5.5	11	3961
50	396.695	73.8786	5.5	11	4046
51	394.295	75.1673	5.5	11	4134
52	396.507	73.5258	5.5	11	4216
53	396.817	73.3001	5.5	11	4299
54	396.351	73.6346	5.5	11	4377
55	395.915	74.0639	5.5	11	4457
56	396.346	74.1659	5.5	11	4532
57	397.223	73.0611	5.5	11	4610
58	397.151	73.0039	5.5	11	4688
59	397.268	72.4892	5.5	11	4761
60	397.366	73.1666	5.5	11	4836
61	397.382	73.4592	5.5	11	4910
62	397.51	73.4317	5.5	11	4981
63	397.585	73.9639	7.06743	11	5059
64	397.774	73.7081	6.9216	11	5132
65	397.957	73.7888	5.5	11	5200
66	398.194	73.6669	7.04218	11	5277
67	398.516	73.307	7.06708	11	5353
68	398.511	73.8531	6.90499	11	5427
69	398.401	74.3334	6.96338	11	5497
70	398.523	74.4153	7.32251	11	5567
71	398.59	74.5103	6.95367	11	5635
72	398.876	73.4038	7.04681	11	5707
73	399.068	73.2913	5.5	11	5775
74	395.474	60.1007	7.40396	11	5843
75	395.203	59.9433	7.54456	11	5913
76	395.054	59.5279	7.92401	11	5982
77	394.888	59.4089	7.79304	11	6051
78	395.116	59.3861	7.90006	11	6122
79	395.241	59.5987	8.0817	11	6193
80	395.143	59.3628	8.36703	11	6262
81	395.052	59.614	8.05306	11	6333
82	394.806	59.2399	8.26817	11	6405
83	394.524	59.0557	8.51643	11	6475
84	394.576	58.7953	8.69449	11	6547
85	394.563	59.0114	8.49326	11	6622
86	394.035	58.6551	8.48745	11	6698
87	393.608	58.7458	8.31214	11	6774
88	394.128	58.7977	8.40679	11	6851
89	394.43	58.6517	8.74875	11	6925
90	394.304	58.5527	8.89759	11	7001
91	394.447	58.6583	8.99611	11	7074
92	393.895	58.4886	8.98553	11	7151
93	393.857	58.4516	9.04446	11	7224
94	393.958	58.7182	8.88558	11	7301
95	394.069	58.4329	9.0813	11	7376
96	394.232	58.5396	9.03492	11	7452
97	394.169	58.0789	9.68742	11	7527
98	389.22	57.1483	9.19321	11	7601
99	393.762	54.6812	9.21628	11	7676
100	393.269	49.791	10.2233	11	7748
101	391.54	49.5383	10.4491	11	7815
102	371.606	41.6153	14.2017	11	7887
103	371.054	38.845	14.1117	11	7957
104	372.713	37.5381	13.6118	11	8028
105	374.753	34.2406	16.8831	11	8127
106	373.729	34.4649	16.4022	11	8188
107	370.806	33.6644	16.5933	11	8252
108	367.173	31.9142	16.0518	11	8316
109	365.159	28.9964	16.1417	11	8383
110	362.186	22.5003	17.1204	11	8448
1	276.333	168.462	5.5	12	11
2	270.868	153.481	5.5	12	61
3	264.132	150.094	11.1818	12	117
4	264.638	149.214	10.9009	12	172
5	265.321	150.105	9.39474	12	230
6	265.346	149.409	10.9727	12	287
7	262.998	149.013	10.4183	12	346
8	258.99	147.032	11.3508	12	408
9	257.582	144.555	12.2533	12	475
10	256.702	140.946	12.7375	12	544
11	256.047	140.319	13.0194	12	617
12	255.008	137.821	12.7388	12	694
13	251.454	133.998	12.8805	12	763
14	250.84	134.023	11.5173	12	843
15	250.287	135.496	12.2253	12	926
16	251.262	133.498	12.1645	12	1012
17	252.502	132.559	11.9584	12	1098
18	252.799	134.058	11.5437	12	1183
19	253.812	134.597	12.3654	12	1274
20	253.908	135.13	12.6472	12	1364
21	253.334	134.72	12.4113	12	1456
22	253.726	134.338	12.8923	12	1550
23	253.584	133.837	13.0058	12	1645
24	254.384	134.078	13.1443	12	1754
25	254.982	134.845	12.7117	12	1851
26	254.385	133.714	12.7629	12	1951
27	254.137	134.322	11.8076	12	2045
28	253.025	134.048	12.476	12	2122
29	253.644	133.097	12.1521	12	2215
30	254.335	133.687	12.5849	12	2319
31	254.463	133.339	13.2326	12	2410
32	254.454	134.064	11.7806	12	2501
33	254.029	133.502	12.1729	12	2593
34	254.52	132.937	12.3113	12	2684
35	254.165	134.247	13.0198	12	2773
36	253.027	134.608	12.4061	12	2845
37	254.968	135.252	12.4462	12	2948
38	253.756	133.694	13.2482	12	3024
39	253.788	134.478	13.0149	12	3113
40	254.29	134.281	12.7881	12	3216
41	253.571	134.096	13.3582	12	3292
42	253.212	133.423	12.2907	12	3378
43	252.93	133.464	12.4484	12	3461
44	251.623	133.94	12.3909	12	3546
45	252.683	133.079	12.4142	12	3630
46	253.144	133.007	12.0877	12	3712
47	254.203	133.293	12.1022	12	3807
48	255.404	135.725	13.4176	12	3888
49	255.198	135.445	13.3763	12	3971
50	249.244	133.122	12.841	12	4044
52	265.811	117.624	12.3435	12	4224
1	289.239	226.695	5.5	13	12
2	289.168	226.765	5.5	13	62
3	289.692	225.09	5.5	13	114
4	287.927	224.732	5.5	13	169
5	286.049	223.954	5.5	13	226
6	289.143	224.96	5.5	13	283
7	289.025	225.05	5.5	13	340
8	288.965	225.35	5.5	13	403
9	289.383	225.561	5.5	13	470
10	288.583	225.883	5.5	13	538
11	288.899	225.944	5.5	13	612
12	291.789	200.594	5.5	13	687
13	289.206	173.495	10.4425	13	771
14	288.408	167.132	8.46711	13	850
15	287.175	168.028	5.5	13	931
16	286.704	168.85	5.5	13	1016
17	285.364	169.036	6.60618	13	1101
18	289.504	168.574	9.72489	13	1197
19	290.41	173.806	10.471	13	1286
20	283.317	170.285	19.9706	13	1426
21	293.979	142.708	5.5	13	1461
1	479.364	12.6055	7.69646	14	13
2	480.841	12.2197	8.35712	14	63
3	480.826	12.4317	8.54526	14	115
4	481.132	12.3462	8.58824	14	170
5	481.065	12.4722	9.02112	14	227
6	480.263	12.2185	8.90772	14	284
7	480.207	12.1729	8.59377	14	342
8	479.894	12.1183	8.63496	14	405
9	480.527	12.1343	8.83869	14	471
10	480.896	12.0192	8.59009	14	539
11	484.548	12.3677	9.78681	14	613
12	485.627	11.476	9.76143	14	689
13	488.134	10.1678	9.53057	14	769
14	485.719	11.6538	9.75418	14	851
15	483.239	12.2666	10.043	14	934
16	482.632	12.3354	10.0856	14	1020
17	483.724	12.1985	10.1545	14	1105
18	486.09	12.0263	10.0592	14	1194
19	490.735	7.21214	9.64624	14	1282
20	492.879	4.54856	9.71657	14	1374
21	493.472	4.36703	9.93057	14	1467
22	492.721	4.58143	9.96985	14	1561
23	494.954	2.84897	10.1436	14	1656
24	494.099	4.89829	10.0903	14	1749
25	494.604	5.06074	10.0578	14	1845
26	493.54	4.78646	10.1409	14	1945
27	493.603	5.0579	10.1571	14	2037
28	493.878	4.79111	10.0866	14	2130
29	494.031	4.80804	10.087	14	2223
30	493.568	5.71317	10.0202	14	2314
31	493.257	5.74672	9.94294	14	2406
32	493.613	5.73874	10.316	14	2496
33	493.958	5.54291	10.2824	14	2590
34	494.981	4.86865	10.259	14	2681
35	496.954	3.04947	9.96131	14	2769
36	496.352	3.1238	10.376	14	2856
37	496.753	3.24734	10.2802	14	2944
38	495.284	4.30823	10.1884	14	3035
39	494.743	4.71551	10.3364	14	3124
40	494.834	4.48748	10.4187	14	3212
41	496.3	2.57627	10.0972	14	3302
42	496.607	1.90625	9.99081	14	3389
43	497.567	0	10.106	14	3471
44	497.11	2.14741	10.4247	14	3555
45	495.65	4.18393	10.3002	14	3638
46	495.387	3.77732	10.4764	14	3722
47	495.968	2.72561	10.4219	14	3804
48	497.258	0	10.242	14	3885
49	495.952	2.00355	10.3185	14	3967
50	496.268	1.54414	10.7112	14	4052
51	495.317	2.73173	10.6203	14	4139
52	494.383	4.09082	10.7445	14	4222
53	493.171	4.6687	10.8179	14	4305
54	492.646	4.60746	10.6212	14	4382
55	492.446	4.83991	10.6225	14	4463
56	493.678	4.14904	10.7417	14	4537
57	493.706	4.12059	10.9093	14	4615
58	493.428	4.58385	11.1268	14	4693
59	493.442	4.69207	11.2738	14	4767
60	493.76	4.75228	11.3798	14	4842
61	494.837	4.07611	11.3297	14	4916
62	495.18	4.23028	11.3813	14	4987
63	495.458	4.40125	11.415	14	5060
64	495.044	4.85929	11.3164	14	5133
65	494.356	5.85616	11.3501	14	5204
66	494.481	6.03797	11.7293	14	5279
67	494.757	5.88445	11.7263	14	5355
68	495.362	5.67661	11.7117	14	5428
69	495.778	5.57827	11.2907	14	5498
70	495.939	5.63655	11.5171	14	5568
71	495.386	5.96138	11.5473	14	5637
72	495.681	6.20613	11.4826	14	5708
73	494.505	6.60632	11.6407	14	5778
74	493.553	7.09107	11.2608	14	5844
75	493.757	6.84251	11.282	14	5915
76	493.834	6.34867	11.3237	14	5983
77	494.312	6.21044	11.2394	14	6053
78	493.752	6.65661	11.1968	14	6123
79	494.275	6.11607	11.6189	14	6194
80	494.061	6.04613	11.9513	14	6265
81	494.598	5.51509	12.0239	14	6336
82	495.425	4.92761	11.9768	14	6408
83	496.243	4.18241	11.4461	14	6476
84	496.779	3.88023	11.9858	14	6550
85	497.116	3.87218	12.0054	14	6624
86	496.321	4.68385	12.1264	14	6700
87	494.336	5.73931	12.3582	14	6777
88	495.743	3.61256	12.3231	14	6854
89	498.078	0	11.6585	14	6926
90	498.143	1.2798	11.9548	14	7003
91	497.847	0	11.7248	14	7076
92	498.272	2.1312	12.7763	14	7153
93	493.863	2.05259	15.5323	14	7226
94	491.515	0	18.3008	14	7342
95	491.576	0	18.0165	14	7418
1	413.43	121.051	9.77756	15	14
2	410.001	117.535	10.4026	15	64
3	400.396	114.143	12.5994	15	118
4	399.935	113.814	12.7107	15	173
5	399.9	113.858	12.733	15	231
6	401.524	114.856	12.2253	15	288
7	405.607	115.861	11.2972	15	344
8	400.537	113.948	12.608	15	409
9	399.423	113.747	12.5926	15	474
10	399.771	113.651	12.9528	15	543
11	396.754	110.025	13.2088	15	616
12	397.071	110.453	13.2154	15	693
13	398.877	111.517	13.3549	15	774
14	396.615	109.884	12.9754	15	856
15	396.049	109.183	12.7862	15	938
16	395.137	108.245	12.0499	15	1024
17	395.054	107.161	10.6477	15	1107
18	395.354	106.958	9.99216	15	1196
19	395.554	106.757	9.53642	15	1285
20	395.265	107.205	10.5032	15	1376
21	395.29	107.242	10.0796	15	1469
22	395.678	107.559	9.10605	15	1559
23	395.511	107.111	9.69305	15	1659
24	395.613	107.76	9.57762	15	1752
25	395.438	107.878	10.1093	15	1848
26	396.227	107.957	9.36882	15	1948
27	396.808	108.261	9.41784	15	2041
28	396.724	108.244	9.51974	15	2133
29	396.514	108.247	9.50991	15	2225
30	397.072	109.083	9.10383	15	2312
31	397.31	109.02	8.94391	15	2403
32	397.268	109.315	8.83539	15	2492
33	397.4	109.499	8.85711	15	2586
34	397.671	109.332	8.6476	15	2678
35	406.677	111.398	9.13542	15	2766
1	370.166	191.064	13.3456	16	15
2	375.73	177.653	14.993	16	91
3	380.395	168.46	13.9971	16	120
4	380.131	167.955	14.2328	16	175
5	379.987	167.525	14.5927	16	259
6	380.249	166.788	14.7319	16	316
7	380.692	166.376	14.6988	16	376
8	380.785	166.444	14.7248	16	443
9	380.603	166.267	14.5434	16	507
10	380.147	167.022	14.5277	16	579
11	379.849	167.454	14.459	16	653
12	379.803	167.038	14.5169	16	731
13	380.393	165.679	15.3783	16	813
14	383.514	161.484	15.5968	16	896
15	384.686	159.166	15.6751	16	978
16	384.013	156.571	15.4331	16	1065
17	384.224	155.24	15.4435	16	1153
18	383.892	154.116	15.2437	16	1240
19	384.259	151.732	15.0744	16	1332
20	384.249	151.314	14.9225	16	1422
21	384.239	150.696	15.119	16	1516
22	384.654	150.781	15.0713	16	1611
23	384.945	150.764	15.3074	16	1708
24	385.146	151.111	15.3813	16	1801
25	385.256	151.183	15.3973	16	1899
26	385.615	150.937	15.1631	16	1995
27	385.647	151.45	15.6529	16	2087
28	385.521	151.875	15.6941	16	2178
29	385.565	152.26	15.8027	16	2270
30	385.752	151.554	15.7978	16	2362
31	385.907	151.518	15.9643	16	2453
32	386.005	151.656	15.9966	16	2546
33	385.756	152.09	15.5429	16	2636
34	385.523	151.98	15.4682	16	2726
35	385.636	151.589	15.6996	16	2814
36	385.555	150.84	15.4012	16	2901
37	385.485	150.271	15.1147	16	2989
38	385.38	150.578	15.2223	16	3079
39	385.287	151.709	15.6773	16	3167
40	385.107	152.17	15.7252	16	3256
41	385.027	152.114	15.5264	16	3343
42	384.919	152.146	15.8186	16	3429
43	385.007	151.683	16.0189	16	3513
44	385.178	150.791	15.7929	16	3597
45	384.84	151.967	16.0077	16	3681
46	384.902	151.447	15.9218	16	3762
47	384.785	151.367	15.9788	16	3843
48	385.43	149.785	15.7172	16	3925
49	385.399	149.401	15.856	16	4009
50	385.019	149.032	15.681	16	4094
51	384.911	150.084	16.4035	16	4179
52	385.024	150.163	16.3982	16	4263
53	384.907	149.525	15.7672	16	4345
54	384.766	145.777	13.5499	16	4385
55	383.756	145.968	13.3514	16	4466
56	383.688	145.406	13.7218	16	4540
57	384.028	145.374	13.8596	16	4618
58	384.604	144.786	14.1886	16	4695
59	385.783	145.186	14.7717	16	4805
60	385.239	145.13	14.5838	16	4882
61	384.198	144.997	13.9056	16	4918
62	384.476	145.295	13.9232	16	4989
63	385.178	145.698	14.6722	16	5099
64	384.791	146.537	14.6853	16	5171
65	384.554	146.485	14.3976	16	5246
66	384.226	146.542	14.1874	16	5284
67	384.923	147.184	14.3546	16	5391
68	385.579	148.097	14.6067	16	5462
69	384.373	146.315	13.9522	16	5502
70	385.977	148.007	14.9505	16	5601
71	385.406	147.001	14.484	16	5672
72	385.619	147.189	14.4048	16	5741
73	385.928	148.625	15.1712	16	5812
74	386.262	152.806	17.2725	16	5886
75	386.11	152.284	17.0813	16	5957
76	386.38	150.177	16.3852	16	6021
78	385.801	152.139	17.22	16	6163
79	386.22	150.936	17.2486	16	6236
80	386.084	150.886	16.9463	16	6304
81	385.782	151.84	17.1197	16	6375
82	385.674	151.156	17.1664	16	6447
83	385.597	151.058	17.2546	16	6521
84	385.751	150.728	17.2574	16	6596
85	385.489	151.218	17.2587	16	6671
86	385.032	153.107	17.0787	16	6748
87	384.794	161.047	18.3096	16	6823
88	384.365	161.266	18.3425	16	6899
89	384.051	161.203	18.3975	16	6973
90	384.621	159.756	18.455	16	7047
91	384.679	159.77	18.5381	16	7120
92	385.046	159.86	18.6973	16	7197
93	385.51	159.554	18.961	16	7270
94	385.813	159.788	19.2788	16	7347
95	385.135	158.276	18.7978	16	7421
96	384.702	159.094	18.8218	16	7496
97	385.055	158.497	19.0554	16	7569
98	385.656	158.891	19.2693	16	7646
99	385.285	156.999	19.0219	16	7714
100	385.558	158.865	19.5663	16	7784
101	385.499	159.814	19.6809	16	7851
102	385.041	162.115	19.6942	16	7924
103	384.88	161.773	19.4409	16	7994
104	385.043	160.818	19.1215	16	8063
105	385.417	160.909	19.4543	16	8133
106	385.938	161.019	19.3538	16	8194
107	386.266	160.735	19.4276	16	8257
108	386.366	157.648	19.0374	16	8320
109	386.051	157.727	18.9867	16	8385
110	385.987	159.861	19.4164	16	8451
111	385.479	160.659	19.4745	16	8511
112	386.212	156.51	18.6622	16	8571
113	386.261	159.136	18.9972	16	8634
114	386.292	156.677	18.9292	16	8698
115	386.045	159.941	19.3604	16	8761
116	385.828	159.948	19.5027	16	8828
117	385.859	159.939	19.7172	16	8888
118	386.705	159.862	19.8852	16	8954
119	387.962	159.176	20.3776	16	9016
120	392.954	153.275	22.3707	16	9083
121	386.004	151.877	18.4437	16	9144
122	385.855	152.171	18.1476	16	9206
123	385.351	152.469	18.3294	16	9268
124	387.945	147.06	20.8123	16	9329
125	387.757	145.512	21.0724	16	9389
126	386.09	149.911	18.4837	16	9444
127	385.624	159.284	19.464	16	9500
128	385.231	160.126	19.4539	16	9556
129	384.79	160.498	19.0374	16	9613
130	384.518	160.399	19.2363	16	9667
131	385.087	159.156	19.4451	16	9723
132	385.463	159.275	19.5127	16	9778
133	385.4	159.134	19.7	16	9836
134	385.804	158.982	19.9595	16	9889
135	386.218	158.806	20.5479	16	9941
136	384.844	159.994	20.1662	16	9996
137	385.711	159.3	20.483	16	10047
138	384.896	160.038	20.5198	16	10099
1	216.156	255.591	5.5	17	16
3	215.807	255.141	5.5	17	121
4	216.48	255.356	5.5	17	176
5	216.707	255.561	5.5	17	232
6	216.019	255.745	5.5	17	289
8	215.568	255.56	5.5	17	410
9	218.873	254.856	5.5	17	476
10	220.579	254.494	5.5	17	545
11	217.082	254.731	5.5	17	618
12	215.974	255.102	5.5	17	697
14	215.619	255.017	5.5	17	859
15	216.136	254.856	5.5	17	942
16	215.518	254.635	5.5	17	1028
17	215.574	254.521	5.5	17	1114
18	215.093	254.631	5.5	17	1204
19	215.436	255.005	5.5	17	1292
20	215.614	255.165	5.5	17	1382
21	215.878	255.287	5.5	17	1475
22	215.285	255.106	5.5	17	1567
23	215.7	254.856	5.5	17	1664
24	215.652	255.078	5.5	17	1758
25	215.437	255.485	5.5	17	1854
26	215.231	255.855	5.5	17	1954
27	215.925	256.205	5.5	17	2047
28	216.008	256.296	5.5	17	2139
29	215.353	255.857	5.5	17	2230
30	215.266	255.344	5.5	17	2322
31	215.338	255.566	5.5	17	2412
32	216.212	256.067	5.5	17	2503
33	216.343	256.522	5.5	17	2595
34	216.908	256.628	5.5	17	2686
35	215.895	256.219	5.5	17	2775
36	215.377	255.605	5.5	17	2860
37	214.264	254.905	5.5	17	2950
38	215.081	255.294	5.5	17	3039
39	215.897	255.615	5.5	17	3128
40	215.748	256.063	5.5	17	3218
41	215.32	255.99	5.5	17	3306
42	215.166	255.451	5.5	17	3395
43	215.246	255.196	5.5	17	3476
44	215.547	255.053	5.5	17	3562
45	214.902	255.095	5.5	17	3644
46	214.416	255.187	5.5	17	3727
47	214.468	255.399	5.5	17	3810
48	214.542	255.136	5.5	17	3891
49	215.369	254.907	5.5	17	3974
50	214.85	254.265	5.5	17	4058
51	214.81	254.022	5.5	17	4145
52	214.499	254.265	5.5	17	4228
53	214.72	255.205	5.5	17	4308
54	214.628	255.264	5.5	17	4387
55	214.49	254.972	5.5	17	4468
56	214.634	254.151	5.5	17	4541
57	214.547	254.069	5.5	17	4619
58	214.442	254.355	5.5	17	4696
59	214.37	254.747	5.5	17	4770
60	214.669	255.267	5.5	17	4846
61	214.356	255.498	5.5	17	4921
62	213.882	255.124	5.5	17	4992
63	213.45	254.766	5.5	17	5064
64	214.672	255.096	5.5	17	5137
65	215.071	255.553	5.5	17	5211
66	215.228	255.816	5.5	17	5286
67	214.969	256.27	5.5	17	5361
1	209.862	312.227	5.5	18	17
2	211.364	303.994	5.5	18	67
3	184.911	288.944	5.5	18	122
4	157.149	271.485	5.5	18	177
5	127.363	278.481	5.5	18	233
7	127.925	278.97	5.5	18	347
8	127.656	278.302	5.5	18	411
10	127.044	277.627	5.5	18	546
11	126.596	277.748	5.5	18	619
12	126.856	277.897	5.5	18	698
13	126.338	277.834	5.5	18	778
14	126.354	277.542	5.5	18	860
15	127.732	278.336	5.5	18	943
16	128.436	278.293	5.5	18	1029
17	127.938	278.332	5.5	18	1115
18	127.654	278.195	5.5	18	1205
19	127.325	278.451	5.5	18	1293
20	127.24	278.571	5.5	18	1383
21	127.683	278.664	5.5	18	1476
22	127.422	278.488	5.5	18	1568
23	128.338	278.776	5.5	18	1665
24	128.394	278.953	5.5	18	1759
25	128.65	279.521	5.5	18	1855
26	129.676	280.044	5.5	18	1955
27	129.113	280.116	5.5	18	2048
28	129.686	280.132	5.5	18	2140
29	128.688	279.557	5.5	18	2231
30	130.103	280.043	5.5	18	2323
31	129.781	280.183	5.5	18	2413
32	129.875	280.099	5.5	18	2504
33	129.182	280.253	5.5	18	2596
34	130.12	280.257	5.5	18	2687
35	129.931	279.915	5.5	18	2776
36	128.455	278.822	5.5	18	2861
37	126.871	278.442	5.5	18	2951
38	125.495	277.995	5.5	18	3040
39	123.228	277.804	5.5	18	3129
40	120.937	278.729	5.5	18	3219
41	119.432	276.4	5.5	18	3307
42	126.014	278.006	5.5	18	3396
43	125.623	278.792	5.5	18	3477
44	124.026	278.977	5.5	18	3563
45	124.323	279.304	5.5	18	3645
46	125.324	279.124	5.5	18	3728
47	126.278	278.931	5.5	18	3811
48	126.959	279.039	5.5	18	3892
49	127.527	278.665	5.5	18	3975
50	127.291	278.648	5.5	18	4059
51	127.169	278.219	5.5	18	4146
52	126.981	278.003	5.5	18	4229
53	126.831	278.676	5.5	18	4309
54	127.145	278.9	5.5	18	4388
55	127.096	278.614	5.5	18	4469
56	127.646	278.203	5.5	18	4542
57	126.604	277.317	5.5	18	4620
58	126.484	277.615	5.5	18	4697
59	126.141	277.815	5.5	18	4771
60	126.044	278.404	5.5	18	4847
61	126.735	278.677	5.5	18	4922
62	126.713	278.753	5.5	18	4993
63	127.053	279.225	5.5	18	5065
64	126.927	279.127	5.5	18	5138
65	127.229	279.839	5.5	18	5212
66	127.685	279.963	5.5	18	5287
67	127.622	280.473	5.5	18	5362
68	127.642	280.345	5.5	18	5432
69	127.905	280.349	5.5	18	5503
70	128.491	280.513	5.5	18	5571
71	128.466	280.12	5.5	18	5642
72	128.391	280.494	5.5	18	5711
73	127.942	280.512	5.5	18	5781
74	128.339	280.743	5.5	18	5848
75	128.464	280.512	5.5	18	5917
76	128.645	279.992	5.5	18	5985
77	128.377	279.778	5.5	18	6055
78	128.663	279.959	5.5	18	6127
79	128.113	279.848	5.5	18	6197
80	127.698	279.556	5.5	18	6266
81	127.09	279.321	5.5	18	6337
82	127.58	279.07	5.5	18	6409
83	127.599	278.886	5.5	18	6479
84	127.474	278.759	5.5	18	6551
85	127.427	278.868	5.5	18	6626
86	126.954	278.563	5.5	18	6703
87	126.537	278.475	5.5	18	6780
88	126.837	278.445	5.5	18	6856
89	126.714	278.202	5.5	18	6930
90	126.925	278.182	5.5	18	7006
91	126.868	278.36	5.5	18	7079
92	126.85	278.256	5.5	18	7156
93	126.914	278.585	5.5	18	7228
94	126.827	278.529	5.5	18	7304
95	126.923	278.324	5.5	18	7380
96	127.29	278.171	5.5	18	7455
97	127.254	278.143	5.5	18	7531
98	127.499	278.443	5.5	18	7607
99	126.71	278.052	5.5	18	7681
100	127.515	279.289	5.5	18	7753
101	127.416	279.439	5.5	18	7820
102	127.725	279.556	5.5	18	7890
103	128.067	279.516	5.5	18	7960
104	128.341	279.646	5.5	18	8031
105	127.705	279.623	5.5	18	8098
106	127.977	279.955	5.5	18	8162
107	127.954	280.416	5.5	18	8227
108	128.049	279.86	5.5	18	8291
109	127.794	280.077	5.5	18	8356
110	127.231	278.967	5.5	18	8419
1	111.574	370.789	5.5	19	18
2	112.543	367.234	5.5	19	68
3	112.537	366.079	5.5	19	123
4	111.086	371.109	5.5	19	179
5	111.604	370.518	5.5	19	235
6	112.676	368.741	5.5	19	291
7	112.349	365.286	5.5	19	350
8	114.156	364.202	7.54923	19	414
9	114.49	364.809	7.64069	19	480
10	117.379	361.217	10.0698	19	555
11	116.336	358.546	10.7223	19	630
12	104.438	352.56	10.3991	19	710
13	103.045	352.053	10.4356	19	790
14	94.261	335.69	11.429	19	870
15	95.0498	333.945	11.4682	19	953
16	95.3012	330.75	11.2024	19	1040
17	95.878	335.001	11.339	19	1127
18	95.7264	334.518	11.5341	19	1217
19	95.6679	334.71	11.5339	19	1305
20	94.9667	335.417	11.222	19	1395
21	94.5101	336.293	11.2507	19	1488
22	95.7631	335.848	11.439	19	1581
23	96.1574	336.271	11.4381	19	1678
24	96.2627	336.572	11.7204	19	1771
25	96.6029	336.421	11.8257	19	1875
26	96.3213	336.67	12.1993	19	1973
27	95.872	337.653	11.9577	19	2060
28	95.5533	337.904	11.9303	19	2156
29	96.312	337.386	12.084	19	2246
30	97.0523	336.498	12.4692	19	2335
31	97.6685	335.281	12.5632	19	2425
32	96.5871	336.635	12.5241	19	2519
33	97.2202	345.045	11.1064	19	2606
1	49.2551	428.883	5.5	20	19
2	49.3903	428.033	5.5	20	69
3	49.1552	427.723	5.5	20	124
4	48.3271	427.548	5.5	20	180
5	48.6782	427.81	5.5	20	236
6	42.6036	426.361	5.5	20	292
7	47.2446	427.853	5.5	20	351
8	48.2468	428.525	5.5	20	416
9	48.1348	427.594	5.5	20	481
10	47.3106	427.555	5.5	20	551
11	43.8631	426.358	5.5	20	625
12	46.3947	427.075	5.5	20	705
13	48.3257	427.661	5.5	20	785
14	45.4648	426.449	5.5	20	865
15	41.7592	425.841	5.5	20	948
16	48.2523	427.722	5.5	20	1034
17	47.6921	427.882	5.5	20	1121
18	48.1672	428.242	5.5	20	1211
19	47.6595	427.94	5.5	20	1298
20	48.0187	428.063	5.5	20	1388
21	48.2399	428.421	5.5	20	1480
22	47.8424	428.16	5.5	20	1572
23	48.7944	428.934	5.5	20	1670
24	47.6701	428.534	5.5	20	1763
25	47.3373	428.437	5.5	20	1862
26	47.2596	428.293	5.5	20	1960
27	47.2795	428.193	5.5	20	2053
28	48.381	428.824	5.5	20	2146
29	47.871	428.386	5.5	20	2237
30	47.9599	428.753	5.5	20	2328
31	48.6691	429.234	5.5	20	2415
33	38.9956	435.414	10.4319	20	2608
34	38.6309	434.007	10.351	20	2698
35	39.0414	433.743	10.585	20	2787
36	38.7456	434.378	10.6287	20	2872
37	38.9886	434.267	10.2555	20	2963
38	37.7439	435.055	10.3165	20	3053
39	38.4894	435.257	10.4916	20	3142
40	38.7634	435.43	10.4957	20	3231
1	189.79	449.942	5.5	21	20
2	210.643	457.349	5.5	21	70
3	210.736	457.627	5.5	21	125
4	206.833	456.814	5.5	21	181
5	203.723	455.465	5.5	21	238
6	202.892	455.396	5.5	21	294
7	202.561	454.889	5.5	21	352
8	204.4	455.587	5.5	21	418
9	205.854	456.166	5.5	21	483
10	205.389	455.866	5.5	21	552
11	204.393	455.41	5.5	21	627
12	205.997	456.001	5.5	21	707
13	208.067	456.268	5.5	21	786
14	212.822	452.843	5.5	21	867
15	212.538	452.389	5.5	21	950
16	212.647	452.447	5.5	21	1035
17	212.943	452.754	5.5	21	1124
18	213.14	452.937	5.5	21	1212
19	213.095	453.23	5.5	21	1299
20	213.09	452.823	5.5	21	1389
21	212.601	453.415	5.5	21	1482
22	212.15	452.197	5.5	21	1574
23	209.623	447.135	5.5	21	1672
24	209.91	446.538	5.5	21	1765
25	210.238	446.136	5.5	21	1863
26	214.882	446.126	5.5	21	1961
1	214.882	479.677	5.5	22	21
2	213.228	478.998	5.5	22	71
3	213.019	478.49	5.5	22	126
4	210.567	474.526	5.5	22	182
6	200.758	471.758	5.5	22	295
7	207.365	469.971	5.5	22	353
8	208.841	472.593	5.5	22	419
9	213.106	478.075	5.5	22	484
10	214.338	479.517	5.5	22	553
11	216.04	479.763	5.5	22	628
12	213.353	478.073	5.5	22	708
13	211.03	475.111	5.5	22	787
14	208.63	468.313	5.5	22	868
15	206.989	469.619	5.5	22	951
16	208.663	471.448	5.5	22	1036
17	211.412	478.847	5.5	22	1125
18	212.396	478.865	5.5	22	1213
19	213.628	478.475	5.5	22	1300
20	213.924	477.862	5.5	22	1390
21	209.685	473.888	5.5	22	1483
22	208.317	467.449	5.5	22	1575
23	207.911	468.035	5.5	22	1673
24	209.712	468.861	5.5	22	1766
25	209.992	469.363	5.5	22	1864
26	209.545	469.464	5.5	22	1962
27	209.277	468.676	5.5	22	2055
28	207.926	469.303	5.5	22	2148
29	209.068	469.306	5.5	22	2240
30	209.971	470.526	5.5	22	2329
31	209.967	470.893	5.5	22	2417
32	209.924	469.669	5.5	22	2509
33	209.894	470.047	5.5	22	2601
34	208.998	470.276	5.5	22	2692
35	207.635	469.362	5.5	22	2780
36	208.707	470.625	5.5	22	2866
37	209.076	470.342	5.5	22	2956
38	208.78	470.819	5.5	22	3045
39	209.395	468.809	5.5	22	3134
40	209.096	468.307	5.5	22	3223
41	208.461	468.174	5.5	22	3313
42	208.594	467.123	5.5	22	3402
43	211.39	465.843	5.5	22	3482
44	212.84	464.847	5.5	22	3569
45	213.549	464.056	5.5	22	3650
46	213.25	463.875	5.5	22	3733
47	213.147	463.479	5.5	22	3816
48	213.32	462.664	5.5	22	3897
49	214.358	461.987	5.5	22	3980
50	214.277	462.089	5.5	22	4063
51	214.883	461.666	5.5	22	4149
52	215.408	461.501	5.5	22	4232
53	215.067	462.047	5.5	22	4312
54	214.294	462.007	5.5	22	4392
55	213.365	462.304	5.5	22	4472
56	214.168	461.912	5.5	22	4544
57	213.158	462.302	7.34672	22	4624
58	213.122	462.474	7.72626	22	4701
59	213.479	462.701	7.21776	22	4775
60	213.569	462.581	7.74107	22	4850
61	213.017	462.873	7.63194	22	4925
62	213.01	463.133	7.09046	22	4996
63	213.061	463.346	7.76588	22	5068
64	213.523	463.671	8.00566	22	5141
65	214.294	463.693	7.79704	22	5215
66	215.031	463.879	7.75203	22	5291
67	214.983	464.059	7.72576	22	5365
68	215.162	464.106	7.45338	22	5435
69	214.097	464.235	7.17659	22	5506
70	214.542	463.817	7.37288	22	5574
71	215.442	464.218	7.24412	22	5645
72	215.608	463.833	7.70309	22	5714
73	216.889	463.696	5.5	22	5783
74	219.245	462.299	5.5	22	5850
75	218.942	462.164	5.5	22	5919
76	229.028	464.789	9.30391	22	5992
77	228.249	464.457	8.80102	22	6059
78	228.781	465.261	9.11777	22	6131
79	228.782	466.098	9.34873	22	6203
80	228.937	466.204	9.85923	22	6274
81	228.872	466.338	10.0577	22	6346
82	226.947	467.093	9.95686	22	6415
83	226.214	466.743	9.95939	22	6484
84	226.701	466.641	10.0853	22	6556
85	228.181	466.322	9.75838	22	6631
86	228.09	466.263	9.78381	22	6708
87	227.922	466.288	9.98476	22	6786
88	226.883	466.554	10.1292	22	6862
89	226.366	466.677	10.4198	22	6936
90	226.731	466.164	10.5041	22	7011
91	226.976	465.928	10.313	22	7084
92	227.717	465.871	10.2149	22	7161
93	227.789	466.061	10.2129	22	7233
94	228.172	465.861	10.4593	22	7310
95	227.959	466.007	10.5063	22	7385
96	227.142	466	10.6841	22	7462
97	227.545	465.943	10.7479	22	7537
98	225.731	466.493	10.8181	22	7612
99	228.486	466.45	10.4562	22	7686
100	228.813	466.379	10.7662	22	7758
101	228.743	466.297	11.0312	22	7825
102	228.655	466.488	11.0951	22	7895
103	227.536	467.333	11.0982	22	7965
104	227.697	467.548	10.9098	22	8037
105	228.522	467.061	10.8481	22	8103
106	229.113	466.949	10.812	22	8166
107	229.666	467.413	10.7907	22	8232
108	229.896	467.234	10.6765	22	8296
109	229.909	467.127	10.9331	22	8360
110	228.813	466.344	10.1786	22	8425
111	229.537	466.434	10.7264	22	8485
112	229.882	466.605	10.5285	22	8546
113	229.307	466.485	10.4663	22	8610
114	229.718	466.65	10.6844	22	8672
115	229.574	466.287	10.7415	22	8734
116	229.505	466.547	11.0027	22	8799
117	228.975	466.272	10.7831	22	8866
118	229.224	466.015	10.6795	22	8930
119	229.52	466.163	10.6067	22	8994
120	229.668	465.863	10.5981	22	9057
121	229.47	465.703	10.7183	22	9123
122	228.767	465.728	10.9504	22	9186
123	227.783	466.003	10.7806	22	9247
124	227.83	465.256	10.4759	22	9309
125	227.401	465.403	10.5802	22	9366
126	228.945	465.545	10.5509	22	9423
127	228.191	465.474	10.8339	22	9479
128	228	465.652	11.0641	22	9536
129	227.851	465.864	11.1161	22	9593
130	228.091	466.036	10.8887	22	9648
131	227.246	465.952	10.7007	22	9703
132	228.637	465.827	10.8723	22	9759
133	228.405	465.675	10.7598	22	9816
134	228.95	465.821	11.1353	22	9870
135	229.052	465.562	11.3479	22	9925
136	229.009	465.709	11.4149	22	9978
137	228.786	465.628	11.4128	22	10030
138	227.802	464.539	11.3162	22	10082
1	24.8178	367.737	7.96762	23	22
2	25.1312	367.384	10.8641	23	74
3	30.9027	373.556	12.0601	23	132
4	30.6998	373.812	12.0643	23	188
5	30.4062	373.76	12.6735	23	244
6	24.8546	367.753	9.38722	23	297
7	23.456	366.588	10.5761	23	354
8	22.7281	364.185	10.5608	23	420
9	22.839	361.87	10.1473	23	485
10	29.9801	372.132	13.6612	23	562
12	64.7812	387.784	25.5	23	749
13	72.1468	380.567	22.9601	23	824
14	80.8849	374.335	19.9995	23	906
15	85.1202	375.835	19.0288	23	989
16	75.5495	335.414	18.7994	23	1075
17	82.5866	332.278	20.3447	23	1163
18	81.6883	331.782	19.5253	23	1252
19	95.1425	326.51	11.4906	23	1304
20	94.7578	326.212	11.137	23	1394
21	94.254	325.969	11.5299	23	1487
22	95.3254	326.034	11.0528	23	1580
23	96.0608	327.366	10.4052	23	1677
24	96.4203	326.869	11.0199	23	1770
25	95.7851	327.835	11.9861	23	1874
1	76.0916	394.855	8.46468	24	23
2	76.2954	394.729	8.58459	24	72
3	76.2665	395.68	9.47406	24	127
4	75.9834	395.726	9.26818	24	183
5	75.6939	395.605	9.56304	24	239
6	75.7016	395.25	9.06772	24	296
7	75.3518	395.167	9.50592	24	355
8	75.4682	394.717	9.27921	24	421
9	75.4788	395.051	9.7453	24	486
10	75.4804	395.052	10.0164	24	557
11	74.9388	394.686	9.59154	24	631
12	74.9976	395.385	9.8592	24	711
13	75.671	395.896	10.242	24	792
14	74.9106	395.5	10.3713	24	872
15	75.6739	394.828	9.77829	24	955
16	75.653	394.624	10.0685	24	1042
17	75.2682	394.642	10.2597	24	1129
18	74.9578	394.484	10.3779	24	1219
19	74.5167	394.363	10.3152	24	1308
20	74.6627	394.477	10.5958	24	1398
21	74.992	394.216	10.5221	24	1491
22	75.493	394.361	10.5285	24	1584
23	75.723	394.583	10.3028	24	1680
24	75.2464	395.033	10.5621	24	1772
25	74.8381	395.023	11.1617	24	1869
26	73.9537	396.779	12.8216	24	1975
27	74.6055	397.102	12.6849	24	2063
28	75.7084	395.559	11.6388	24	2153
29	76.1145	394.544	10.8726	24	2244
30	72.4851	397.203	13.5456	24	2336
31	67.3834	400.617	15.278	24	2463
32	64.4551	406.574	11.5039	24	2516
33	66.1495	417.441	25.5	24	2656
34	66.0395	410.953	23.4678	24	2736
35	62.5088	397.773	20.4227	24	2824
36	58.5463	394.595	19.6703	24	2910
37	57.4301	393.684	18.9167	24	2996
38	57.1575	393.339	18.7353	24	3086
39	58.1064	391.654	18.858	24	3174
40	61.8182	385.6	18.3857	24	3265
41	52.6071	384.851	19.7667	24	3354
42	51.8504	384.856	19.9426	24	3440
43	50.4887	385.068	19.8887	24	3524
44	52.7933	392.199	25.5	24	3614
46	66.6517	428.045	25.5	24	3780
47	66.3499	428.94	25.5	24	3862
48	66.0453	429.143	25.5	24	3947
49	66.1054	421.942	25.5	24	4032
50	65.7386	420.15	25.5	24	4118
51	69.0005	371.654	16.9093	24	4189
1	99.3385	421.277	9.24367	25	24
2	99.2716	421.547	9.165	25	73
3	100.062	421.494	9.50401	25	129
4	99.269	421.869	9.48728	25	185
5	99.087	421.932	9.47193	25	241
6	99.3663	421.797	9.5782	25	299
7	99.0325	420.906	9.40836	25	357
8	81.5091	434.376	15.5422	25	448
9	79.1959	429.99	14.5214	25	513
10	78.6605	430.018	15.1567	25	587
11	78.1942	428.723	14.852	25	660
12	81.301	435.868	16.0132	25	739
13	89.19	440.21	16.0822	25	821
15	70.5863	430.8	25.5	25	998
17	71.3489	413.817	25.5	25	1170
18	69.5465	411.505	20.2618	25	1253
19	64.1593	376.435	19.8849	25	1343
20	64.4948	374.743	13.6478	25	1403
21	73.1924	367.039	16.5122	25	1526
22	83.2558	362.289	10.3389	25	1582
1	77.1764	419.497	10.2962	26	25
2	79.2542	420.802	10.8175	26	75
3	79.417	420.498	11.1316	26	128
4	80.2038	420.392	11.2833	26	184
5	78.3391	417.87	10.5008	26	240
6	75.2138	417.916	9.96886	26	298
7	75.6842	417.347	9.7634	26	356
8	100.082	407.396	5.5	26	415
10	175.177	351.724	14.7245	26	586
11	197.918	323.251	9.99446	26	629
12	200.58	323.296	5.5	26	700
13	198.391	315.677	5.5	26	780
14	187.913	303.839	9.61156	26	869
15	184.363	301.964	7.91076	26	952
16	185.146	302.528	7.59419	26	1037
17	186.567	303.643	8.06452	26	1126
18	188.454	305.56	8.17527	26	1214
19	187.936	304.398	8.30401	26	1301
20	185.392	303.442	8.37044	26	1391
21	184.165	302.533	7.95028	26	1484
22	184.108	301.828	8.18755	26	1576
23	183.387	301.07	8.28324	26	1674
24	188.577	305.341	8.88877	26	1768
25	189.56	306.284	8.6835	26	1866
26	188.772	305.939	9.18437	26	1963
27	186.774	304.434	9.35418	26	2057
28	185.985	303.969	8.94691	26	2151
29	186.663	304.212	8.58246	26	2242
30	186.74	304.156	8.86293	26	2331
31	186.036	303.49	8.66021	26	2419
32	185.018	303.011	8.5622	26	2511
1	1.66353	490.95	10.5823	27	26
2	3.97183	491.265	10.5821	27	76
3	1.65358	490.452	10.3665	27	130
4	1.1914	490.202	10.669	27	186
5	4.15358	491.232	10.7241	27	242
6	5.67212	491.647	10.5522	27	300
7	5.31352	491.274	10.8857	27	359
8	3.88408	490.602	10.8951	27	422
9	0.877248	489.712	10.1748	27	488
10	0	489.701	10.5929	27	560
11	0.637033	489.967	11.164	27	634
12	3.86783	490.581	10.9702	27	713
13	5.04623	490.967	11.5564	27	794
14	4.70317	490.8	11.3732	27	876
15	4.81324	491.246	11.9626	27	959
16	0	489.079	10.5025	27	1045
17	0	488.978	11.0226	27	1133
18	0	487.675	10.3584	27	1223
19	0	488.243	10.557	27	1312
20	1.81406	488.723	10.9962	27	1402
21	1.53514	489.041	11.1934	27	1495
22	0	488.732	10.9185	27	1587
23	0	488.73	10.9254	27	1684
24	0	489.037	11.0975	27	1777
25	0	490.065	11.8393	27	1878
26	4.57386	491.198	11.8702	27	1977
27	5.80373	491.786	12.4423	27	2066
28	5.52046	491.66	12.4663	27	2160
29	4.93353	491.387	12.634	27	2249
30	4.06532	491.379	12.0807	27	2339
31	3.02032	490.637	12.1375	27	2430
32	3.50107	491.013	11.9748	27	2523
33	5.25205	491.682	12.3281	27	2613
34	5.59319	491.521	12.3291	27	2704
35	4.78186	490.866	11.9809	27	2793
36	0	488.361	11.0845	27	2874
37	0	489.469	11.1651	27	2965
38	0	488.402	10.9666	27	3055
39	1.65094	488.772	11.0348	27	3144
40	3.07416	489.39	11.5088	27	3233
41	3.74856	490.029	12.1133	27	3323
42	3.1658	489.56	11.9627	27	3412
43	2.10999	489.503	11.9415	27	3494
44	0	488.233	11.4126	27	3575
45	0	488.109	11.4435	27	3655
46	1.17751	488.176	11.8957	27	3744
47	3.17647	489.169	12.1216	27	3825
48	4.04519	489.766	12.7041	27	3906
49	4.39312	489.929	12.5663	27	3989
50	1.25583	488.089	11.2688	27	4068
51	0	486.476	11.0805	27	4153
52	1.66534	488.651	12.2993	27	4241
53	3.61969	489.376	11.9816	27	4322
54	5.65274	491.023	12.5838	27	4402
55	5.1863	490.495	12.4418	27	4481
1	200.473	367.757	13.2715	28	27
2	199.434	369.35	13.3471	28	77
3	200.368	367.509	13.6385	28	131
4	200.442	367.31	13.774	28	187
5	201.095	366.567	13.8263	28	243
6	200.508	367.578	13.7087	28	301
7	200.571	367.522	13.6883	28	360
8	200.621	366.393	13.6758	28	423
9	199.886	367.096	13.6635	28	489
10	200.117	366.612	13.8347	28	561
11	200.105	365.989	13.9291	28	635
12	199.814	365.611	14.293	28	738
13	199.503	366.5	14.3338	28	819
14	199.233	365.543	14.2141	28	877
15	199.033	366.058	14.4136	28	985
16	198.956	366.444	14.1538	28	1046
17	199.497	366.379	14.0847	28	1134
18	200.334	364.71	14.3436	28	1247
19	200.035	365.336	14.3346	28	1339
20	201.221	365.169	14.2669	28	1430
21	199.4	367.469	14.1149	28	1496
22	197.964	368.163	14.117	28	1589
23	197.088	366.526	14.5457	28	1716
24	197.495	366.635	15.0418	28	1812
25	197.753	368.456	14.6254	28	1910
26	199.438	368.231	15.0381	28	2005
27	200.366	369.327	14.8442	28	2096
28	200.594	369.03	14.6307	28	2188
29	200.485	370.464	14.7891	28	2280
30	201.058	368.533	14.7579	28	2371
31	201.4	366.387	15.2192	28	2462
32	200.817	369.635	14.8312	28	2555
33	198.516	370.338	14.5463	28	2643
34	189.483	373.359	12.9645	28	2701
35	189.689	373.713	12.831	28	2790
36	189.446	373.551	12.8873	28	2877
37	189.232	373.399	12.954	28	2968
38	189.297	373.191	13.0076	28	3058
39	189.545	374.119	12.9098	28	3147
40	189.214	373.582	13.0248	28	3235
41	188.751	373.98	12.9297	28	3321
42	188.781	373.457	12.9474	28	3410
43	188.648	373.551	13.0736	28	3492
44	187.768	374.504	12.7923	28	3579
45	188.017	373.978	12.9805	28	3659
46	187.867	373.676	12.9627	28	3741
47	187.777	373.919	12.8863	28	3824
48	187.65	374.134	12.9203	28	3904
49	187.379	374.725	12.9349	28	3987
50	187.618	374.169	13.0772	28	4071
51	187.613	373.978	13.0179	28	4157
52	187.552	374.753	13.018	28	4239
53	187.348	374.555	13.0366	28	4319
54	186.982	374.898	12.7283	28	4399
55	187.113	375.401	12.8635	28	4480
56	188.116	375.368	12.9278	28	4555
57	191.94	376.763	13.2234	28	4632
58	194.596	377.947	13.5322	28	4709
1	375.065	255.65	5.5	29	28
2	376.524	256.451	5.5	29	78
3	380.332	259.31	5.5	29	133
4	381.745	261.051	5.5	29	189
5	382.685	261.895	5.5	29	245
6	382.366	261.696	5.5	29	302
7	382.662	261.52	5.5	29	361
8	382.309	261.163	5.5	29	426
9	383.519	261.703	5.5	29	491
10	383.755	261.604	5.5	29	563
11	383.008	261.543	5.5	29	637
12	382.692	261.152	5.5	29	716
13	383.256	261.646	5.5	29	796
14	384.315	261.822	5.5	29	878
15	386.135	262.431	5.5	29	960
16	386.025	262.478	5.5	29	1048
17	386.709	262.557	5.5	29	1135
18	386.876	262.188	5.5	29	1225
19	386.546	262.107	5.5	29	1313
20	386.313	262.112	5.5	29	1404
21	386.549	262.536	5.5	29	1497
22	386.975	263.132	5.5	29	1590
23	387.569	264.08	5.5	29	1688
24	388.771	265.937	5.5	29	1782
25	388.634	265.568	5.5	29	1879
26	389.269	266.996	5.5	29	1978
27	389.916	269.096	5.5	29	2068
28	391.77	272.182	5.5	29	2162
29	391.418	271.608	6.9345	29	2255
30	391.476	271.362	5.5	29	2341
31	391.34	271.008	6.99833	29	2436
32	391.448	271.238	6.80739	29	2529
33	391.966	272.089	6.85422	29	2620
34	391.303	271.192	5.5	29	2706
35	391.627	271.471	7.10156	29	2800
36	391.43	271.243	7.01803	29	2885
37	390.865	270.393	6.97992	29	2975
38	391.385	271.515	6.97233	29	3064
39	391.52	271.578	7.27962	29	3153
40	391.375	271.373	7.51087	29	3243
41	405.599	269.89	12.6016	29	3334
42	405.296	269.729	12.8544	29	3424
43	404.893	269.45	13.03	29	3506
44	405.233	269.545	12.6281	29	3591
45	404.879	269.437	12.9772	29	3672
46	405.733	269.497	12.7317	29	3753
47	404.764	269.192	13.0974	29	3837
1	393.815	344.263	5.5	30	29
2	394.015	343.749	5.5	30	79
3	393.852	344.497	5.5	30	134
4	393.135	343.522	5.5	30	190
5	393.694	345.211	5.5	30	246
6	393.469	343.91	5.5	30	303
7	393.521	345.454	5.5	30	362
8	393.46	343.496	5.5	30	427
9	393.566	342.918	5.5	30	492
10	393.646	343.731	5.5	30	565
11	393.15	343.673	5.5	30	638
12	393.154	343.071	5.5	30	717
13	393.432	344.182	5.5	30	798
14	393.342	342.922	5.5	30	879
15	392.987	343.311	5.5	30	962
16	393.24	343.594	5.5	30	1050
17	393.317	343.883	5.5	30	1137
18	393.424	343.671	5.5	30	1227
19	393.386	344.724	5.5	30	1316
20	393.462	343.977	5.5	30	1408
21	394.06	343.841	5.5	30	1501
22	394.606	342.841	5.5	30	1594
23	394.51	343.998	5.5	30	1692
24	394.249	344.005	5.5	30	1785
25	394.01	345.024	5.5	30	1882
26	394.587	345.224	5.5	30	1981
27	395.009	345.757	5.5	30	2071
28	394.822	345.795	5.5	30	2165
29	395.177	344.585	5.5	30	2253
30	394.941	345.269	5.5	30	2344
31	391.865	352.639	5.5	30	2434
32	391.812	352.409	5.5	30	2526
33	391.931	352.669	5.5	30	2617
34	393.514	353.093	5.5	30	2709
35	394.065	355.405	5.5	30	2797
36	394.29	355.477	5.5	30	2882
37	393.85	355.764	5.5	30	2971
38	393.285	355.133	5.5	30	3061
39	394.132	355.494	5.5	30	3150
40	394.493	355.593	5.5	30	3240
41	394.175	355.137	5.5	30	3327
42	394.077	355.072	5.5	30	3416
43	395.838	353.29	5.5	30	3498
44	395.993	350.855	5.5	30	3584
45	395.6	353.995	5.5	30	3665
46	394.991	353.054	5.5	30	3747
47	395.683	353.378	5.5	30	3829
48	396.529	354.147	5.5	30	3911
49	396.58	355.159	5.5	30	3994
50	395.949	354.706	5.5	30	4077
51	394.745	353.982	5.5	30	4165
52	394.705	353.794	5.5	30	4246
53	394.283	353.25	5.5	30	4327
54	393.789	351.479	5.5	30	4407
1	326.652	406.245	5.5	31	30
2	326.635	405.483	5.5	31	80
3	326.116	406.869	5.5	31	135
4	326.447	405.879	5.5	31	191
5	326.778	405.506	5.5	31	247
6	327.119	405.524	5.5	31	304
7	326.747	405.411	5.5	31	363
8	326.458	405.272	5.5	31	428
9	326.464	406.704	5.5	31	493
10	326.089	406.995	5.5	31	567
11	326.615	406.629	5.5	31	639
12	326.843	406.234	5.5	31	718
13	327.319	406.48	5.5	31	799
14	326.671	405.489	5.5	31	880
15	326.403	405.945	5.5	31	963
16	325.782	406.09	5.5	31	1051
17	326.14	406.201	5.5	31	1138
18	326.291	405.892	5.5	31	1228
19	326.763	405.686	5.5	31	1317
20	326.93	405.472	5.5	31	1409
21	326.715	405.621	5.5	31	1502
22	326.331	405.307	5.5	31	1595
23	325.546	405.832	5.5	31	1693
24	326.176	405.699	5.5	31	1786
25	326.505	405.139	5.5	31	1883
26	326.134	403.049	7.29271	31	1983
27	326.84	404.108	6.87099	31	2074
28	327.151	405.068	7.47164	31	2168
29	326.751	404.559	6.92074	31	2257
30	326.396	405.095	6.85275	31	2347
31	325.663	403.824	7.46432	31	2437
32	326.223	403.532	7.88993	31	2530
33	326.692	403.946	7.37235	31	2621
34	326.77	403.789	7.63928	31	2712
35	326.72	403.924	7.94767	31	2801
36	326.283	404.41	7.43532	31	2886
37	325.733	404.641	7.08845	31	2976
38	325.11	404.62	7.55003	31	3065
39	325.754	403.904	7.57686	31	3154
40	326.052	403.49	7.96532	31	3244
41	325.692	402.381	8.21242	31	3330
42	325.415	401.67	8.2895	31	3419
43	324.899	401.282	7.84286	31	3501
44	324.994	402.499	7.53812	31	3587
45	324.857	402.62	8.02465	31	3667
46	325.872	403.556	7.83261	31	3749
47	325.801	403.049	7.96021	31	3832
48	325.867	402.828	8.3892	31	3914
49	326.797	405.21	7.98173	31	3997
50	326.59	406.314	7.89131	31	4080
51	325.938	406.739	7.65598	31	4167
52	326.453	405.244	8.16656	31	4248
53	326.022	404.771	7.55861	31	4329
54	325.462	402.691	7.94673	31	4410
55	325.511	402.154	8.40306	31	4487
56	326.064	403.949	8.82478	31	4560
57	326.253	405.72	8.66882	31	4637
58	325.167	404.466	8.89566	31	4714
59	326.515	406.323	8.69331	31	4786
60	326.25	404.5	9.01693	31	4863
61	326.578	404.666	9.08229	31	4938
62	327	405.468	9.11704	31	5009
63	326.799	405.907	9.22691	31	5081
64	326.808	406.816	9.21691	31	5154
65	325.954	405.66	9.15626	31	5230
67	326.961	455.87	17.0601	31	5412
68	326.653	456.625	16.7832	31	5481
69	326.971	455.438	16.5068	31	5549
70	327.345	455.886	16.7416	31	5621
71	327.041	455.679	17.0337	31	5689
72	312.589	440.136	20.028	31	5759
73	292.601	421.312	23.5141	31	5832
74	292.371	421.141	25.5	31	5903
75	292.9	421.935	23.2713	31	5970
76	292.067	420.041	25.5	31	6042
77	292.237	418.528	23.7	31	6108
78	292.529	418.978	25.5	31	6182
79	290.95	420.62	25.5	31	6251
80	290.583	420.798	25.5	31	6322
81	290.764	420.692	25.5	31	6394
82	289.928	420.288	24.0915	31	6464
83	291.075	419.619	25.5	31	6539
84	292.584	421.963	24.4572	31	6610
85	294.876	426.114	21.0497	31	6686
86	296.872	428.562	19.9105	31	6763
87	303.457	437.09	20.5548	31	6839
88	311.729	437.556	20.7838	31	6913
89	312.173	440	21.6265	31	6987
1	481.301	440.608	5.5	32	31
2	481.108	439.625	5.5	32	81
3	481.414	439.886	5.5	32	136
4	481.595	439.987	5.5	32	192
5	481.428	440.395	5.5	32	248
6	481.162	439.987	5.5	32	305
7	481.095	440.049	5.5	32	364
8	480.221	439.699	5.5	32	429
9	479.938	439.246	5.5	32	494
10	480.67	440.045	5.5	32	568
11	480.638	439.932	5.5	32	640
12	480.753	439.901	5.5	32	719
13	480.602	439.731	5.5	32	800
14	480.679	439.263	5.5	32	881
15	480.314	439.388	5.5	32	964
16	480.406	439.625	5.5	32	1052
17	480.623	439.896	5.5	32	1139
18	480.932	440.046	5.5	32	1229
19	480.743	439.966	5.5	32	1318
20	480.627	439.933	5.5	32	1410
21	480.509	440.058	5.5	32	1503
22	480.167	440.039	5.5	32	1596
23	480.767	440.353	5.5	32	1694
24	481.372	440.91	5.5	32	1787
25	480.472	441.111	5.5	32	1884
26	481.091	441.285	5.5	32	1982
27	481.201	441.018	5.5	32	2072
28	481.229	441.104	5.5	32	2166
29	481.018	441.049	5.5	32	2254
30	481.039	441.322	5.5	32	2345
31	481.129	441.621	5.5	32	2435
32	481.85	441.429	5.5	32	2527
33	481.74	441.708	5.5	32	2618
34	481.475	441.375	5.5	32	2710
35	479.686	441.664	5.5	32	2798
36	478.191	441.688	5.5	32	2883
37	480.591	441.279	5.5	32	2973
38	480.044	441.755	5.5	32	3062
39	481.201	441.314	5.5	32	3151
40	481.373	441.186	5.5	32	3241
41	480.94	441.162	5.5	32	3328
42	479.933	441.016	5.5	32	3417
43	480.265	441.252	5.5	32	3499
44	481.057	441.107	5.5	32	3585
45	481.365	440.965	5.5	32	3666
46	480.98	440.952	5.5	32	3748
47	480.98	440.687	5.5	32	3831
48	479.81	440.795	5.5	32	3913
49	480.107	440.262	5.5	32	3996
50	480.706	440.29	5.5	32	4079
51	480.654	440.02	5.5	32	4166
52	480.983	440.029	6.79934	32	4249
53	480.708	440.315	6.83049	32	4330
54	480.541	440.443	5.5	32	4408
55	480.698	440.591	7.2348	32	4488
56	480.219	440.342	7.68033	32	4561
57	480.102	440.497	7.75364	32	4638
58	480.635	440.76	7.8488	32	4715
59	480.706	440.697	8.16779	32	4787
60	480.653	441.081	8.182	32	4864
61	481.15	440.994	8.48309	32	4939
62	481.271	441.184	8.4238	32	5010
63	481.116	441.259	8.54097	32	5082
64	481.172	441.13	8.48929	32	5155
65	481.518	441.741	8.4423	32	5231
66	482.136	442.005	8.51962	32	5304
67	482.023	442.158	8.61694	32	5377
68	482.164	442.06	8.46605	32	5447
69	481.614	442.014	8.23073	32	5519
70	481.769	441.989	8.65277	32	5588
71	481.645	442.171	8.74546	32	5658
72	481.957	442.15	8.44052	32	5728
73	481.186	442.412	8.91565	32	5798
74	482.278	442.337	8.2969	32	5865
75	482.409	442.108	8.23663	32	5937
76	482.05	441.739	8.43237	32	6003
77	481.684	441.841	8.40809	32	6074
78	481.743	441.83	8.61392	32	6146
79	482.117	441.959	8.68407	32	6217
80	482.293	441.961	8.69811	32	6285
81	482.087	441.738	8.91234	32	6356
82	481.693	441.55	8.84767	32	6427
[truncated: 8,118 more rows]
