# Supplementary material for: Functional visualization of NK cell-mediated killing of metastatic single tumor cells
Source: eLife journal article supplement (doi:10.7554/elife.76269), 2022-02-03
Supplement: supp [file nk_pos_5.xlsx]

## Sheet: Sheet1
1	235.864	126.027	8.00693	1	0
2	235.851	125.516	7.96757	1	37
3	236.132	125.308	8.10526	1	78
4	236.208	125.291	8.08358	1	119
5	236.491	123.971	8.16559	1	158
6	236.322	122.898	8.28164	1	199
7	236.054	123.994	7.99379	1	241
8	235.999	124.487	7.86765	1	283
9	235.695	125.54	7.59507	1	325
10	235.588	125.44	7.64015	1	367
11	234.766	126.746	7.58442	1	411
12	233.373	128.326	7.09714	1	455
13	233.624	127.665	7.30649	1	501
14	233.575	127.143	7.40609	1	548
15	233.674	127.444	7.51836	1	594
16	233.324	127.8	7.38837	1	645
17	233.526	127.922	7.514	1	695
18	233.822	127.658	7.56546	1	747
19	233.398	127.46	7.49263	1	798
20	233.155	126.872	7.48252	1	851
21	232.495	127.953	7.35482	1	902
22	232.655	127.821	7.51554	1	953
23	233.303	127.589	7.74437	1	1005
24	233.39	127.6	7.71832	1	1055
25	232.42	127.74	7.69406	1	1108
26	231.356	129.098	7.61291	1	1160
27	230.454	129.985	7.70952	1	1212
28	231.982	128.281	7.71705	1	1264
29	232.224	127.958	7.7184	1	1317
30	232.613	128.003	7.86771	1	1370
31	233.61	127.132	8.01162	1	1421
32	233.491	126.889	8.08274	1	1471
33	234.236	125.802	8.40206	1	1520
34	234.416	125.52	8.51277	1	1569
35	232.908	128.441	8.32648	1	1619
36	234.27	127.34	8.49449	1	1669
37	235.114	126.08	8.75375	1	1721
38	235.129	126.892	8.92532	1	1773
39	234.552	127.818	8.56339	1	1825
40	234.796	127.67	8.61385	1	1877
41	234.997	127.191	8.85194	1	1929
42	235.138	127.353	8.62016	1	1979
43	235.896	126.633	8.8811	1	2030
44	235.726	127.061	8.57762	1	2083
45	235.987	126.727	8.4336	1	2136
46	235.46	126.549	8.65823	1	2189
47	234.205	127.853	8.25782	1	2243
48	234.715	127.548	8.22848	1	2297
49	234.728	127.362	8.53349	1	2351
50	234.939	127.654	8.22926	1	2404
51	234.966	127.454	8.20148	1	2453
52	234.814	127.496	8.38282	1	2501
53	233.751	128.053	8.42704	1	2551
54	232.727	129.028	7.91896	1	2604
55	232.154	130.012	7.74781	1	2659
56	233.267	129.031	8.14789	1	2711
57	232.406	130.67	8.31148	1	2764
58	232.596	130.62	8.28025	1	2815
59	232.256	130.481	8.22472	1	2865
60	231.744	130.499	8.09263	1	2916
61	231.429	130.504	8.07105	1	2965
62	231.513	130.51	8.17926	1	3016
63	231.98	130.778	8.3266	1	3066
64	232.053	130.471	8.3238	1	3116
65	231.906	130.232	8.14329	1	3163
66	231.743	129.727	8.00065	1	3210
67	232.635	128.188	8.06626	1	3259
68	233.005	127.719	8.22127	1	3309
69	235.624	123.833	8.93176	1	3360
70	237.227	121.45	9.30919	1	3409
71	237.784	120.975	9.49503	1	3461
72	237.057	122.02	9.43414	1	3512
73	237.183	122.387	9.52918	1	3565
74	237.456	121.798	9.68287	1	3616
75	237.736	121.685	9.65298	1	3668
76	237.946	121.898	9.68099	1	3722
77	238.287	121.946	9.83055	1	3774
78	238.654	122.36	9.87575	1	3828
79	238.866	122.244	9.85277	1	3883
80	238.783	122.549	9.93208	1	3936
81	238.761	122.463	9.86501	1	3991
82	238.933	122.174	9.91918	1	4044
83	238.855	121.946	9.98852	1	4097
84	238.884	122.255	10.0705	1	4151
85	238.849	122.398	9.92366	1	4202
86	238.244	122.105	9.92777	1	4257
87	238.68	121.919	9.71826	1	4314
88	238.67	121.67	9.72019	1	4371
89	238.673	121.493	9.64432	1	4427
90	238.531	121.571	9.79039	1	4484
91	238.721	121.605	9.6382	1	4538
92	238.727	121.568	9.52553	1	4594
93	238.266	121.436	9.66739	1	4649
94	238.367	120.991	9.83286	1	4705
95	238.263	120.698	9.75848	1	4761
96	238.556	120.526	9.70836	1	4817
97	238.514	120.393	9.95272	1	4873
98	238.456	120.465	9.89039	1	4927
99	238.559	119.584	9.89688	1	4982
100	238.161	119.736	9.87468	1	5034
101	237.84	119.57	9.87093	1	5083
102	237.613	119.524	10.0389	1	5132
103	238.065	119.712	9.96638	1	5183
1	49.5043	41.0417	11.3455	2	1
2	49.5542	41.6783	11.4004	2	38
3	49.356	41.0281	11.1196	2	79
4	49.4782	41.3389	11.0581	2	120
5	49.4551	40.2898	11.0436	2	159
6	48.6383	41.6304	10.9587	2	200
7	48.9118	41.9236	10.8959	2	242
8	49.5555	41.3006	10.9942	2	284
9	49.6267	41.4325	10.7778	2	326
10	49.8041	40.7635	10.6216	2	368
11	49.7549	40.032	10.6154	2	412
12	49.8628	39.7215	10.7116	2	457
13	50.2894	40.5258	10.6608	2	503
14	49.9816	40.6385	10.8939	2	549
15	50.1544	41.2885	10.9427	2	595
16	49.4043	40.8	10.353	2	646
17	49.6775	40.0346	10.5211	2	696
18	49.4152	39.6195	10.5253	2	748
19	49.5135	39.5611	10.6098	2	799
20	46.2343	40.8485	10.7503	2	852
21	49.0933	40.4149	10.8797	2	903
22	49.2262	40.3785	11.3981	2	954
23	48.9786	39.1629	10.6434	2	1006
24	49.3148	39.404	10.7924	2	1056
25	49.4093	39.4697	11.4539	2	1109
27	48.7786	39.736	11.034	2	1213
28	48.5492	39.8224	11.0165	2	1265
29	48.8807	39.4364	11.36	2	1318
1	214.803	63.5007	11.791	3	2
2	218.088	52.6742	13.3713	3	40
3	217.598	50.8456	13.6393	3	80
4	217.778	52.1954	13.5165	3	121
5	218.09	51.3705	13.442	3	160
6	218.071	52.0295	13.1884	3	201
7	217.85	52.6755	13.1589	3	243
8	217.693	51.288	13.239	3	285
9	214.445	46.7474	15.2831	3	351
10	215.144	42.2068	15.8982	3	394
11	216.126	41.3409	16.1607	3	437
12	215.451	43.5897	18.4585	3	484
13	207.394	44.4768	22.1049	3	535
14	204.539	43.2886	20.5418	3	579
15	204.864	46.2328	18.7919	3	626
16	206.99	50.6178	18.0581	3	678
17	209.246	66.5775	20.461	3	728
18	210.38	73.1292	17.64	3	779
19	208.722	78.3911	14.4129	3	832
20	210.495	85.2381	15.3547	3	882
21	212.487	92.9233	17.4667	3	935
1	235.802	177.252	12.8018	4	3
2	234.831	176.824	12.7666	4	41
3	235.646	177.024	12.8625	4	81
4	235.778	178.845	13.0188	4	122
5	236.228	179.686	12.9654	4	161
6	235.982	178.615	12.7515	4	202
7	235.056	177.401	12.6342	4	244
8	234.644	176.834	12.502	4	286
9	234.462	179.342	12.9181	4	327
10	233.602	178.641	13.1285	4	370
11	233.644	180.191	12.7578	4	414
12	231.577	179.728	12.5887	4	458
13	230.916	180.218	12.926	4	504
14	230.79	180.243	13.1183	4	550
15	262.528	191.031	5.5	4	604
16	288.279	190.8	5.5	4	652
17	292.543	189.158	5.5	4	702
18	301.478	184.826	5.5	4	754
19	304.89	178.62	5.5	4	805
20	304.886	183.954	5.5	4	857
21	308.281	183.158	5.5	4	908
22	314.307	180.178	5.5	4	960
23	318.122	172.578	5.5	4	1012
24	334.198	178.335	9.04328	4	1064
25	338.032	172.441	7.6207	4	1117
26	338.076	171.31	8.0568	4	1169
27	337.868	172.621	7.65743	4	1222
28	337.573	173.515	7.85005	4	1273
29	337.567	172.899	8.03008	4	1325
30	337.211	172.421	7.84641	4	1379
31	338.031	171.751	8.18191	4	1428
1	385.319	96.9785	5.5	5	4
2	385.641	97.7231	5.5	5	42
3	385.71	97.4175	5.5	5	82
4	385.57	94.5481	5.5	5	123
5	386.385	99.4101	5.5	5	162
6	386.504	99.2816	5.5	5	203
7	386.348	98.7507	5.5	5	245
8	385.8	97.6643	5.5	5	287
9	385.147	96.3501	5.5	5	328
10	384.835	96.2119	5.5	5	371
11	384.435	96.3269	5.5	5	415
12	384.251	95.8823	5.5	5	459
13	384.567	95.6166	5.5	5	505
14	379.781	95.8964	5.5	5	551
15	379.922	102.877	5.5	5	598
16	380.317	104.086	5.5	5	649
17	381.122	104.922	5.5	5	698
18	382.169	106.153	5.5	5	750
19	383.256	106.582	5.5	5	802
20	382.811	106.05	5.5	5	854
21	382.933	105.95	5.5	5	905
22	382.852	106.387	5.5	5	957
23	382.64	106.564	5.5	5	1009
24	382.103	106.265	5.5	5	1058
25	382.536	106.437	5.5	5	1113
26	382.827	106.185	5.5	5	1165
27	383.145	106.053	5.5	5	1218
28	382.571	105.918	5.5	5	1269
29	382.523	106.016	5.5	5	1321
30	382.632	106.124	5.5	5	1375
31	382.549	106.532	5.5	5	1424
32	383.065	106.359	5.5	5	1475
33	383.256	106.592	5.5	5	1524
34	383.803	107.151	5.5	5	1572
35	383.352	106.96	5.5	5	1622
36	383.46	107.143	5.5	5	1672
37	383.474	107.462	5.5	5	1724
38	383.758	107.563	5.5	5	1776
39	384.073	107.43	5.5	5	1829
40	384.283	107.514	5.5	5	1880
41	384.156	107.249	5.5	5	1932
42	384.513	108.08	5.5	5	1982
43	384.402	108.087	5.5	5	2033
44	384.548	108.393	5.5	5	2086
45	384.612	108.034	5.5	5	2139
46	384.389	107.602	5.5	5	2192
47	384.565	107.471	5.5	5	2246
48	384.625	107.668	5.5	5	2300
49	384.72	107.854	5.5	5	2355
50	384.648	107.904	5.5	5	2407
51	384.596	107.875	5.5	5	2456
52	384.453	107.501	5.5	5	2505
53	384.29	107.023	5.5	5	2554
54	384.179	106.422	5.5	5	2608
55	384.189	107.508	5.5	5	2663
56	384.585	107.457	5.5	5	2715
57	384.338	107.203	5.5	5	2767
58	384.256	107.5	5.5	5	2818
59	384.291	107.107	5.5	5	2869
60	384.524	106.884	5.5	5	2919
61	384.796	106.937	5.5	5	2967
62	384.235	106.794	5.5	5	3018
63	384.312	107.019	5.5	5	3069
64	384.283	107.151	5.5	5	3118
65	383.931	106.621	5.5	5	3165
66	384.244	106.632	5.5	5	3212
67	384.136	106.367	5.5	5	3261
68	384.057	106.258	5.5	5	3312
69	383.987	106.612	5.5	5	3365
70	383.932	106.565	5.5	5	3415
71	384.062	106.876	5.5	5	3465
72	384.051	106.533	5.5	5	3515
73	384.433	106.368	5.5	5	3568
74	384.611	106.75	5.5	5	3619
75	384.549	106.854	5.5	5	3672
76	384.367	107.029	5.5	5	3726
77	384.754	107.416	5.5	5	3778
78	384.735	107.55	5.5	5	3832
79	384.741	107.156	5.5	5	3886
80	384.969	107.136	5.5	5	3940
81	385.169	107.162	5.5	5	3994
82	385.288	107.763	5.5	5	4048
83	385.726	108.091	5.5	5	4101
84	385.195	107.797	5.5	5	4155
85	384.487	106.806	5.5	5	4206
86	383.845	105.517	5.5	5	4260
87	383.594	104.701	5.5	5	4317
88	386.326	107.972	5.5	5	4374
89	386.287	108.314	5.5	5	4430
90	385.728	107.886	5.5	5	4487
91	385.946	108.483	5.5	5	4542
92	385.913	107.941	5.5	5	4597
93	385.904	107.555	5.5	5	4653
94	386.684	108.463	5.5	5	4709
95	386.763	108.674	5.5	5	4764
96	386.65	108.556	5.5	5	4819
97	386.093	107.939	5.5	5	4877
98	385.829	107.871	5.5	5	4931
99	386.668	108.611	5.5	5	4986
100	385.599	107.151	5.5	5	5037
101	385.477	106.877	5.5	5	5086
102	385.372	107.083	5.5	5	5137
103	385.614	107.246	5.5	5	5187
104	385.154	106.998	5.5	5	5233
105	385.829	107.818	5.5	5	5282
106	385.562	107.279	5.5	5	5329
107	385.257	106.685	5.5	5	5378
108	385.213	106.533	5.5	5	5426
109	385.427	106.918	5.5	5	5476
110	384.785	106.253	5.5	5	5525
111	384.871	106.401	5.5	5	5575
112	385.471	107.244	5.5	5	5623
113	385.6	107.148	5.5	5	5671
114	385.949	107.074	5.5	5	5719
115	386.015	107.434	5.5	5	5767
116	386.011	107.798	5.5	5	5816
117	386.264	108.075	5.5	5	5868
118	386.297	108.639	5.5	5	5919
119	386.218	108.536	5.5	5	5969
120	386.116	108.096	5.5	5	6016
121	386.265	107.902	5.5	5	6064
122	386.329	108.197	5.5	5	6112
123	386.186	108.29	5.5	5	6158
124	385.822	107.978	5.5	5	6205
125	385.309	107.554	5.5	5	6250
126	386.137	108.203	5.5	5	6297
127	386.493	108.254	5.5	5	6344
128	386.391	108.05	5.5	5	6391
129	385.83	107.457	5.5	5	6441
130	387.222	109.395	5.5	5	6493
131	387.05	109.073	5.5	5	6544
132	387.249	109.563	5.5	5	6595
133	387.115	108.998	5.5	5	6647
134	387.684	109.262	5.5	5	6700
135	386.746	108.207	5.5	5	6750
136	386.301	108.341	5.5	5	6800
137	386.823	109.006	5.5	5	6849
138	386.15	108.296	5.5	5	6901
139	386.669	108.779	5.5	5	6953
140	386.552	108.679	5.5	5	7004
141	386.7	108.055	5.5	5	7054
142	386.653	107.911	5.5	5	7101
143	386.456	108.154	5.5	5	7146
144	385.87	107.678	5.5	5	7194
145	385.659	107.771	5.5	5	7244
146	385.552	107.348	5.5	5	7297
147	385.576	106.924	5.5	5	7349
148	385.553	106.839	5.5	5	7398
149	385.895	107.112	5.5	5	7449
150	385.7	107.145	5.5	5	7500
151	385.903	107.458	6.8696	5	7551
152	385.938	107.584	7.08529	5	7600
153	385.945	107.598	7.16878	5	7646
154	386.48	107.734	7.51927	5	7693
155	386.796	108.095	7.64607	5	7740
156	387.548	108.855	7.75834	5	7792
157	386.863	108.636	7.49705	5	7842
158	386.659	108.286	7.52963	5	7894
159	387.029	108.252	7.63772	5	7943
160	387.413	108.918	7.64681	5	7994
161	387.271	108.693	7.50958	5	8043
162	387.485	108.655	7.42562	5	8093
163	387.601	108.764	7.37224	5	8142
164	387.781	108.979	6.97218	5	8191
165	387.79	109.339	7.15668	5	8240
166	387.894	109.34	6.98332	5	8288
167	387.654	108.934	7.25573	5	8337
168	387.595	108.764	7.25225	5	8385
169	387.461	108.521	5.5	5	8428
170	386.947	107.867	7.29661	5	8478
171	386.826	108.146	7.1273	5	8523
172	386.826	108.192	7.34896	5	8568
173	387.343	108.747	7.00185	5	8615
174	387.72	108.764	6.89649	5	8661
175	388.202	109.081	6.79741	5	8705
176	388.548	109.582	5.5	5	8746
177	388.077	108.957	7.32163	5	8789
1	395.752	116.043	5.5	6	5
2	396.597	123.338	5.5	6	44
3	396.786	126.792	5.5	6	84
4	399.667	133.108	5.5	6	125
5	400.407	132.789	5.5	6	165
6	400.216	132.584	5.5	6	206
7	400.971	133.965	5.5	6	247
8	401.235	135.447	5.5	6	289
9	399.477	132.685	5.5	6	330
10	398.506	131.983	5.5	6	373
11	397.982	129.937	5.5	6	416
12	399.57	132.465	5.5	6	462
13	399.805	133.008	5.5	6	509
14	399.824	132.448	5.5	6	555
15	399.483	132.465	5.5	6	603
16	398.706	132.571	5.5	6	651
17	397.685	130.372	5.5	6	701
18	398.362	130.92	5.5	6	753
19	397.607	128.658	5.5	6	804
20	397.667	129.481	5.5	6	856
21	399.605	133.278	5.5	6	907
22	399.444	132.842	5.5	6	959
23	398.633	132.382	5.5	6	1011
24	398.875	132.338	5.5	6	1060
25	398.538	131.375	5.5	6	1115
26	398.194	130.5	5.5	6	1167
27	396.505	126.075	5.5	6	1220
28	396.633	126.82	5.5	6	1271
29	397.879	130.246	5.5	6	1323
30	398.547	132.142	5.5	6	1377
31	399.368	132.68	5.5	6	1426
32	399.508	132.218	5.5	6	1477
33	398.912	130.892	5.5	6	1526
34	397.715	129.164	5.5	6	1574
35	398.783	130.907	5.5	6	1624
36	397.674	129.051	5.5	6	1674
37	400.133	134.101	5.5	6	1726
38	400.507	133.849	5.5	6	1778
39	401.736	135.014	5.5	6	1831
40	401.677	135.089	5.5	6	1883
41	398.388	129.339	5.5	6	1935
42	399.651	131.706	5.5	6	1985
43	397.847	128.206	5.5	6	2035
44	399.924	132.314	5.5	6	2089
45	400.522	133.56	5.5	6	2142
46	400.282	132.66	5.5	6	2195
47	400.225	132.296	5.5	6	2249
48	399.054	130.153	5.5	6	2302
49	397.717	127.572	5.5	6	2358
50	397.327	126.992	5.5	6	2410
51	400.249	133.27	5.5	6	2459
52	400.863	133.213	5.5	6	2508
53	404.98	141.168	5.5	6	2557
54	404.512	141.813	5.5	6	2611
55	402.876	138.986	5.5	6	2666
56	402.59	139.841	5.5	6	2718
57	402.799	140.516	5.5	6	2771
58	404.182	142.017	5.5	6	2822
59	404.605	142.673	5.5	6	2872
60	404.228	141.781	5.5	6	2922
61	403.562	138.47	5.5	6	2970
62	404.297	129.048	8.60304	6	3021
63	407.311	125.343	8.14291	6	3072
1	370.842	238.342	5.5	7	6
2	370.365	238.696	5.5	7	45
3	370.643	238.379	5.5	7	85
4	370.543	238.276	5.5	7	126
5	371.412	239.053	5.5	7	166
6	371.388	239.199	5.5	7	207
7	370.947	239.15	5.5	7	248
8	370.875	239.283	5.5	7	290
9	370.583	238.801	5.5	7	331
10	370.205	237.724	5.5	7	374
11	370.161	237.519	5.5	7	418
12	369.77	237.647	5.5	7	463
13	369.538	237.845	5.5	7	510
14	369.124	237.396	5.5	7	556
15	368.977	237.534	5.5	7	605
16	368.862	237.706	5.5	7	653
17	369.588	237.618	5.5	7	703
18	369.57	237.436	5.5	7	755
19	369.292	237.387	5.5	7	806
20	368.663	237.299	5.5	7	858
21	369.122	237.625	5.5	7	909
22	369.033	237.408	5.5	7	961
23	369.384	237.281	5.5	7	1013
24	368.969	236.796	5.5	7	1061
25	368.898	237.051	5.5	7	1116
26	369.201	237.263	5.5	7	1168
27	369.252	237.274	5.5	7	1221
28	369.327	237.56	5.5	7	1272
29	369.331	237.407	5.5	7	1324
30	369.404	236.802	5.5	7	1378
31	369.258	236.87	5.5	7	1427
32	369.72	237.484	5.5	7	1478
33	369.873	237.666	5.5	7	1527
34	369.891	238.199	5.5	7	1575
35	370.198	238.565	5.5	7	1625
36	370.43	238.829	7.01082	7	1675
37	370.255	237.73	7.04906	7	1727
38	370.477	238.028	7.04534	7	1779
39	370.626	238.476	5.5	7	1832
40	370.148	238.188	5.5	7	1884
41	370.564	238.881	5.5	7	1936
42	370.567	238.569	6.96618	7	1987
43	370.962	238.398	6.89732	7	2037
44	370.878	238.063	6.91602	7	2091
45	370.614	238.035	5.5	7	2144
46	368.373	237.029	5.5	7	2197
47	367.066	235.683	7.04234	7	2252
48	366.859	235.824	7.24218	7	2307
49	368.246	236.556	5.5	7	2362
50	368.645	236.251	5.5	7	2414
51	369.129	236.168	7.15337	7	2462
52	368.884	236.124	6.83602	7	2511
53	367.207	235.082	7.15343	7	2562
54	367.723	235.716	5.5	7	2613
55	368.045	236.369	5.5	7	2669
56	368.709	236.125	5.5	7	2721
57	368.775	236.005	7.05908	7	2775
58	368.9	235.904	6.87795	7	2825
59	368.529	235.642	6.95408	7	2875
60	368.028	235.854	5.5	7	2924
61	367.034	234.717	6.80304	7	2973
62	367.038	234.754	7.42412	7	3023
63	369.564	236.154	7.07612	7	3074
64	369.986	236.077	7.21287	7	3122
65	369.243	235.537	7.27602	7	3169
66	368.445	235.44	6.95394	7	3216
67	367.857	235.098	7.29621	7	3265
68	368.269	235.514	6.98513	7	3318
69	367.793	235.442	7.33463	7	3371
70	367.619	234.895	7.49347	7	3419
71	367.597	234.436	7.55927	7	3470
72	367.652	234.352	7.58648	7	3521
73	367.746	234.576	8.05559	7	3573
74	368.17	235.186	7.90591	7	3623
75	367.98	235.26	8.04599	7	3676
76	368.469	235.935	8.00755	7	3730
77	368.643	235.711	8.03939	7	3784
78	368.891	235.812	8.34033	7	3838
79	368.93	236.032	8.26329	7	3892
80	368.847	236.01	8.25889	7	3946
81	369.457	236.746	8.33895	7	3999
82	369.407	237.002	8.21904	7	4052
83	369.427	236.672	8.36348	7	4105
84	369.656	236.34	8.49443	7	4159
85	369.887	236.358	8.39184	7	4211
86	369.697	236.149	8.24694	7	4264
87	369.507	236.277	8.11811	7	4323
88	369.09	236.241	8.05604	7	4379
89	369.082	236.251	8.10947	7	4434
90	368.459	235.888	8.16963	7	4491
91	369.05	235.743	8.20264	7	4546
92	369.135	235.503	8.20615	7	4601
93	369.024	235.527	8.52063	7	4657
94	368.291	235.253	8.51762	7	4712
95	368.075	235.195	8.14502	7	4768
96	368.146	235.256	8.24663	7	4824
97	367.903	234.739	8.33646	7	4880
98	368.208	234.475	8.33555	7	4935
99	368.313	234.649	8.52102	7	4989
100	367.759	234.517	8.36903	7	5041
101	367.272	234.372	8.54506	7	5090
102	367.352	234.65	8.55076	7	5140
103	367.72	234.544	8.46379	7	5190
104	367.789	234.274	8.53454	7	5236
105	368.118	234.094	8.7477	7	5286
106	368.211	234.097	8.93457	7	5333
107	368.041	234.105	8.74255	7	5382
108	367.757	234.264	8.62981	7	5430
109	367.696	234.644	8.62704	7	5480
110	367.926	234.342	8.91374	7	5528
111	368.339	234.392	9.39003	7	5580
112	368.424	234.462	9.44366	7	5627
113	368.536	234.48	9.61051	7	5675
114	368.439	234.786	9.57334	7	5723
115	368.12	234.843	9.70753	7	5773
116	368.737	235.608	9.62183	7	5821
117	368.809	235.573	9.60969	7	5874
118	368.843	235.693	9.67839	7	5925
119	369.131	235.55	9.67053	7	5975
120	369.425	235.832	9.72395	7	6021
121	369.091	235.674	9.80264	7	6068
122	368.659	235.929	9.56281	7	6116
123	369.038	236.309	9.46558	7	6162
124	369.253	236.27	9.45124	7	6210
125	368.859	235.481	9.69337	7	6255
126	369.037	235.164	9.58951	7	6302
127	368.83	235.251	9.51432	7	6349
128	368.627	236.06	9.03095	7	6394
129	368.674	235.909	9.13759	7	6444
130	368.742	235.881	9.37759	7	6498
131	368.972	235.67	9.01925	7	6546
132	368.963	235.449	9.41897	7	6601
133	369.102	235.434	9.20689	7	6650
134	368.466	235.057	9.62819	7	6705
135	367.947	234.858	9.3479	7	6756
136	367.696	234.807	9.59307	7	6805
137	367.771	234.833	9.63213	7	6854
138	368.144	234.867	9.56937	7	6906
139	368.074	234.349	9.80717	7	6958
140	368.307	234.64	9.626	7	7009
141	368.259	234.252	9.74935	7	7059
142	367.814	234.481	9.65435	7	7107
143	368.011	234.645	9.56663	7	7154
144	368.93	235.306	9.65038	7	7202
145	369.571	235.291	9.73542	7	7251
146	369.6	235.211	9.6686	7	7303
147	367.802	234.782	9.72348	7	7355
148	368.651	234.911	9.86292	7	7405
149	368.051	234.635	9.80246	7	7454
150	368.045	234.879	10.0131	7	7506
151	368.726	235.26	10.0172	7	7556
152	368.957	235.091	10.2322	7	7603
153	368.987	234.829	10.3464	7	7649
154	369.327	235.589	10.2502	7	7696
155	369.886	236.273	10.3118	7	7746
156	370.239	236.551	10.3635	7	7796
157	368.959	236.057	10.4261	7	7846
158	369.697	236.523	10.3874	7	7897
159	369.976	236.656	10.5079	7	7947
160	369.916	236.123	10.5226	7	7998
161	369.607	235.973	10.4606	7	8047
162	369.785	236.401	10.5013	7	8097
163	369.643	236.384	10.3339	7	8146
164	369.896	236.627	10.3896	7	8195
165	369.92	236.212	10.4037	7	8244
166	370.522	236.181	10.2803	7	8293
167	370.649	236.227	10.2979	7	8341
168	370.08	236.266	10.16	7	8388
169	370.512	236.855	10.0872	7	8435
170	370.722	236.964	10.1672	7	8481
171	370.522	236.91	10.1839	7	8525
172	370.572	236.204	10.1835	7	8571
173	370.057	235.419	10.25	7	8618
174	370.757	236.103	10.1603	7	8664
175	370.262	236.357	10.0249	7	8708
176	370.637	236.629	10.0209	7	8750
177	370.747	236.5	10.1105	7	8792
1	415.078	216.305	9.80618	8	7
2	415.986	217.899	9.72704	8	46
3	416.771	218.766	9.72968	8	87
4	415.229	218.326	9.54523	8	127
5	415.657	216.032	9.95288	8	167
6	416.068	217.013	9.89505	8	208
7	416.369	217.375	10.0101	8	250
8	415.312	214.792	10.0632	8	291
9	415.017	215.36	10.2772	8	332
10	414.228	214.844	9.72429	8	376
11	414.818	214.665	9.94272	8	419
12	414.693	214.443	9.47441	8	464
13	414.616	214.423	9.58551	8	512
14	414.756	214.364	9.87077	8	558
15	414.752	214.821	9.89069	8	608
16	413.931	214.997	9.83113	8	656
17	414.212	214.358	9.86277	8	708
18	414.937	215.574	9.73284	8	759
19	414.639	214.383	9.92147	8	810
20	414.578	214.029	9.99623	8	861
21	414.525	214.285	10.1271	8	913
22	414.287	214.655	10.1225	8	964
23	413.972	214.811	9.99004	8	1016
24	414.199	214.842	10.116	8	1067
25	414.431	214.156	9.93386	8	1120
26	414.331	214.028	10.0432	8	1171
27	414.361	214.069	10.2957	8	1224
28	414.746	215.086	10.1311	8	1275
29	415.307	216.408	10.3164	8	1328
30	414.406	214.371	10.4457	8	1381
31	415.028	216.319	10.1888	8	1430
32	414.656	214.856	10.568	8	1480
33	414.746	214.565	10.4111	8	1529
34	414.715	214.761	10.3807	8	1577
35	414.739	214.522	10.5773	8	1627
36	414.879	214.919	10.8562	8	1677
37	414.995	215.678	10.5954	8	1729
38	415.418	215.258	10.7224	8	1781
39	415.626	215.513	10.4656	8	1834
40	415.694	215.091	10.5712	8	1886
41	415.891	192.506	12.3964	8	1940
42	415.701	192.528	12.1352	8	1991
43	415.942	192.051	12.3729	8	2042
44	415.947	191.849	12.4682	8	2096
45	415.785	191.597	12.1574	8	2148
46	415.816	192.545	11.9339	8	2202
47	415.931	192.762	12.2413	8	2256
48	416.035	193.353	12.1912	8	2310
49	415.785	193.514	12.3864	8	2366
50	415.458	193.551	12.4026	8	2418
51	415.252	193.497	12.5719	8	2466
52	414.399	194.217	12.4139	8	2515
53	415.27	195.799	12.2138	8	2566
54	416.073	196.375	11.5298	8	2617
55	415.424	191.547	12.016	8	2676
56	415.613	192.371	12.1407	8	2728
57	415.403	193.267	12.5648	8	2780
58	415.289	193.791	12.4804	8	2831
59	415.419	196.299	12.2682	8	2881
60	415.138	193.931	12.3863	8	2931
61	415.441	193.474	12.3769	8	2978
62	414.925	192.542	12.267	8	3029
63	414.605	193.034	12.6461	8	3079
64	414.684	193.742	12.7507	8	3127
65	415.274	196.928	11.8964	8	3174
66	415.452	197.039	11.9599	8	3220
67	415.438	195.444	11.8975	8	3269
68	415.67	197.054	11.5702	8	3319
69	414.819	193.38	12.6099	8	3374
70	415.121	194.711	12.4579	8	3423
71	415.372	197.492	11.8613	8	3474
72	415.566	198.345	11.4543	8	3523
73	415.701	196.888	12.4161	8	3576
74	416.227	197.515	12.2088	8	3627
75	415.944	193.917	12.6838	8	3680
76	416.127	194.542	12.7125	8	3734
77	415.92	193.205	13.1543	8	3788
78	415.819	192.75	13.0565	8	3843
79	416.165	193.828	13.0847	8	3896
80	416.227	193.575	13.2035	8	3951
81	416.964	193.911	13.0901	8	4005
82	416.907	194.376	12.7938	8	4057
83	417.156	199.953	11.7855	8	4110
84	416.733	200.255	11.5291	8	4161
85	416.019	193.02	13.0141	8	4215
86	417.263	200.16	11.5018	8	4268
87	420.247	211.142	8.72307	8	4321
88	419.198	209.039	9.93873	8	4383
89	419.285	209.46	9.71995	8	4439
90	415.85	194.476	12.9235	8	4497
91	415.921	195.997	12.9211	8	4552
92	415.816	195.545	12.8151	8	4607
93	416.305	191.983	13.0903	8	4663
94	416.258	192.768	12.8672	8	4719
95	416.13	193.273	12.8217	8	4775
96	415.879	193.129	12.9438	8	4830
97	416.311	194.864	12.9675	8	4886
98	415.411	192.746	12.9906	8	4939
99	415.487	192.987	13.0618	8	4994
100	416.231	196.797	12.793	8	5046
101	416.064	193.004	12.9973	8	5095
102	416.246	194.87	12.8145	8	5145
103	416.476	197.793	12.3287	8	5193
104	415.803	191.841	13.0738	8	5239
105	415.236	191.804	13.6361	8	5289
106	415.571	192.055	13.3866	8	5337
107	415.528	191.857	13.4954	8	5385
108	415.893	192.415	13.0702	8	5433
109	415.796	192.16	13.0486	8	5484
110	416.365	190.575	13.155	8	5532
111	415.714	191.759	13.5468	8	5582
112	416	191.898	13.5799	8	5629
113	416.724	191.321	13.8269	8	5677
114	416.737	191.84	13.7997	8	5726
115	417.01	192.09	13.7243	8	5774
116	417.227	192.621	13.4062	8	5823
117	416.518	193.998	13.7305	8	5877
118	416.666	193.655	13.7586	8	5927
119	416.285	193.873	14.1842	8	5976
120	416.613	193.487	14.262	8	6040
121	417.206	194.022	14.1198	8	6069
122	417.499	194.042	13.7032	8	6118
123	417.33	194.096	13.3788	8	6164
124	417.125	194.168	13.6376	8	6212
125	416.844	193.457	13.7989	8	6257
126	416.755	193.899	13.158	8	6303
127	417.307	193.438	13.6724	8	6351
128	417.248	194.176	13.5466	8	6399
129	417.149	194.907	13.284	8	6449
130	416.81	194.613	13.1675	8	6500
131	416.803	195.735	13.5337	8	6551
132	416.373	193.903	13.6682	8	6603
133	416.671	195.197	13.1965	8	6654
134	416.554	194.858	13.7185	8	6706
135	416.749	197.274	13.6462	8	6757
136	416.614	193.722	13.6175	8	6807
137	415.816	193.999	14.0295	8	6855
138	415.875	193.977	14.0232	8	6909
139	416.253	192.664	14.0588	8	6960
140	416.362	193.246	13.7526	8	7010
141	416.774	193.453	13.273	8	7060
142	416.78	193.276	13.6583	8	7108
143	416.65	192.334	13.4852	8	7156
144	416.502	192.315	13.6187	8	7203
145	416.147	192.057	14.0963	8	7252
146	415.804	192.12	14.1456	8	7305
147	416.457	192.273	13.672	8	7357
148	416.39	193.996	13.571	8	7407
149	416.479	193.312	13.7414	8	7456
150	416.439	192.362	13.7504	8	7508
151	416.609	193.375	14.5232	8	7572
152	416.58	194.234	14.7362	8	7621
153	416.573	194.4	14.8283	8	7665
154	417.113	194.89	14.9341	8	7711
155	417.457	195.102	14.2685	8	7762
156	417.734	195.949	14.3312	8	7812
157	417.853	197.137	14.0871	8	7847
158	417.73	196.057	14.8745	8	7911
159	418.014	193.57	14.6809	8	7962
160	418.091	193.424	14.6374	8	8012
161	418.088	193.914	14.4585	8	8062
162	418.397	193.808	14.7182	8	8112
163	418.781	192.557	14.2011	8	8147
164	418.375	194.251	14.6448	8	8211
165	418.354	194.776	14.6119	8	8260
166	417.859	195.58	14.5264	8	8309
167	417.588	192.897	14.4947	8	8361
168	418.087	193.228	13.9971	8	8389
169	418.184	193.782	13.9665	8	8436
170	417.932	192.873	13.9321	8	8482
171	417.951	194.014	14.2815	8	8546
172	417.938	192.845	14.947	8	8590
173	417.429	192.751	14.8251	8	8638
174	417.581	194.65	14.7356	8	8681
175	417.798	194.515	13.9153	8	8709
176	417.838	193.892	14.0809	8	8751
177	417.604	193.65	14.4754	8	8809
1	372.622	77.8975	12.6945	9	8
2	372.333	78.9502	12.9248	9	47
3	372.414	79.0033	12.8442	9	88
4	372.903	79.6105	12.997	9	128
5	373.2	78.4122	12.8662	9	169
6	372.84	78.4187	12.8495	9	211
7	372.743	78.2287	12.9099	9	253
8	372.664	78.5772	12.9314	9	293
9	372.852	79.4135	13.2215	9	335
10	373.062	78.1411	13.1835	9	377
11	373.33	77.6443	12.873	9	422
12	372.684	77.2754	12.7339	9	467
13	372.286	77.2891	12.6807	9	514
14	372.316	77.6636	12.8061	9	560
15	371.736	77.9448	12.5964	9	610
16	371.845	78.4863	12.7557	9	658
17	372.545	77.7229	12.5936	9	709
18	372.451	77.0303	12.4749	9	760
19	371.808	76.5795	12.0522	9	812
20	370.834	76.4786	11.9344	9	862
21	371.09	77.051	12.0623	9	914
22	370.966	77.0606	12.4367	9	966
23	371.457	76.3632	12.4233	9	1017
24	371.59	76.389	12.5696	9	1068
25	371.86	76.9408	12.7351	9	1121
26	372.12	76.6624	12.7011	9	1174
27	371.491	76.7302	12.5441	9	1226
28	370.862	76.3949	12.0823	9	1276
29	370.888	76.4344	12.178	9	1329
30	371.557	76.26	12.8087	9	1382
31	371.725	76.1867	12.6543	9	1431
32	372.189	76.1683	12.9306	9	1481
33	372.342	76.6728	13.4103	9	1530
34	371.795	77.6253	13.5452	9	1578
35	371.849	77.3608	13.2582	9	1628
36	372.164	77.483	13.0722	9	1678
37	372.127	76.7717	12.6883	9	1730
38	372.485	76.8542	13.0462	9	1782
39	372.637	77.1598	13.237	9	1835
40	372.44	77.1001	12.8241	9	1887
41	375.511	78.0575	15.5689	9	1939
42	372.323	77.4816	12.7708	9	1990
43	372.704	77.333	13.0783	9	2041
44	373.234	77.1516	13.223	9	2095
45	373.064	76.7213	12.8671	9	2146
46	372.326	76.7154	12.3925	9	2200
47	372.308	76.8566	12.6149	9	2255
48	372.329	77.1291	12.6732	9	2309
49	372.145	76.8783	12.6312	9	2365
50	372.523	76.5869	12.8434	9	2416
51	373.003	76.4863	12.9543	9	2464
52	373.209	76.4721	13.1896	9	2513
53	373.366	76.6677	13.3915	9	2564
54	373.582	77.4707	13.6054	9	2618
55	373.271	77.5061	13.6144	9	2675
56	373.01	76.9254	13.0621	9	2726
57	373.094	77.0755	13.2613	9	2778
58	373.191	76.6833	13.2344	9	2829
59	372.845	76.4901	13.1013	9	2880
60	372.587	76.1003	12.9321	9	2930
61	372.108	75.8771	12.8149	9	2976
62	371.947	75.1611	12.6501	9	3027
63	372.533	75.7294	12.8571	9	3077
64	373.119	75.6653	13.02	9	3126
65	372.946	75.4602	12.8499	9	3173
66	372.613	75.5973	12.7164	9	3218
67	372.395	75.9894	13.031	9	3267
68	372.336	76.0166	12.9892	9	3321
69	372.369	75.4875	12.8694	9	3372
70	372.018	75.1783	12.7138	9	3421
71	372.496	75.1326	13.0554	9	3472
72	372.749	75.6464	13.3086	9	3524
73	372.996	75.8694	13.2607	9	3574
74	372.94	76.082	13.3761	9	3625
75	372.879	76.2568	13.4674	9	3678
76	373.267	76.6608	13.7031	9	3732
77	373.463	76.6917	13.5574	9	3786
78	373.809	76.4086	13.578	9	3841
79	373.827	76.8588	13.8727	9	3895
80	374.042	77.3707	13.6984	9	3950
81	373.761	77.4634	13.4685	9	4003
82	373.967	77.9805	13.6098	9	4055
83	373.964	77.5934	13.8742	9	4108
84	374.352	77.3762	13.8817	9	4162
85	374.124	76.9567	13.7833	9	4213
86	374.245	77.2958	13.8832	9	4269
87	374.071	76.9897	13.3615	9	4326
88	373.761	77.1806	14.0298	9	4384
89	373.524	77.2195	13.4608	9	4440
90	373.659	76.7915	13.5537	9	4494
91	373.601	76.3747	13.2961	9	4549
92	373.807	76.3202	13.4102	9	4605
93	373.613	76.2451	13.8081	9	4661
94	373.558	76.7398	14.1905	9	4717
95	373.393	76.6647	14.2413	9	4773
96	373.475	76.292	13.7936	9	4828
97	373.299	76.2902	13.6453	9	4884
98	373.692	75.8574	13.6222	9	4938
99	373.7	75.8247	13.7499	9	4992
100	373.112	75.7447	13.2872	9	5044
101	373.278	76.0969	13.7448	9	5093
102	373.091	76.037	13.8066	9	5143
103	372.821	76.0156	13.8901	9	5192
104	373.681	76.2141	14.3847	9	5259
105	374.079	75.5186	14.3188	9	5309
106	373.675	75.3439	14.2571	9	5355
107	373.791	75.8328	14.549	9	5405
108	373.249	75.8147	14.4769	9	5452
109	372.562	75.7258	13.7816	9	5482
110	372.609	75.4068	14.0383	9	5531
111	373.308	74.7684	13.5052	9	5581
112	373.422	74.7795	13.7018	9	5628
113	373.466	74.9308	13.9697	9	5676
114	373.123	74.6761	13.7534	9	5724
115	373.078	75.9471	14.2633	9	5792
116	373.816	77.0886	14.8403	9	5842
117	373.71	76.3781	14.13	9	5876
118	373.521	76.481	13.9765	9	5926
119	374.913	77.0637	14.8467	9	5994
120	374.898	77.229	14.5501	9	6039
121	374.484	77.1287	14.4596	9	6088
122	374.252	77.3196	14.4925	9	6134
123	374.2	77.6503	14.3923	9	6180
124	374.086	77.2069	14.0786	9	6211
125	374.163	76.6603	13.85	9	6256
126	373.983	77.2641	14.307	9	6321
127	373.908	77.0055	13.9885	9	6350
128	373.579	76.8694	13.7654	9	6398
129	373.759	76.9545	13.7983	9	6448
130	373.639	76.979	14.0747	9	6499
131	373.93	76.4922	14.1349	9	6550
132	374.096	76.2129	13.7923	9	6602
133	376.351	74.5771	5.5	9	6645
134	377.048	73.892	5.5	9	6698
135	377.09	72.6059	5.5	9	6748
136	373.685	77.3319	14.877	9	6824
137	374.287	77.3541	14.9809	9	6872
138	374.217	76.909	14.5399	9	6926
139	374.236	76.201	14.4739	9	6977
140	373.6	76.4395	14.7122	9	7028
141	373.58	76.6665	14.6893	9	7077
142	373.743	76.1077	14.8637	9	7125
143	373.285	76.2319	14.463	9	7171
144	373.291	76.3827	14.5631	9	7219
145	373.799	75.4991	14.5178	9	7270
146	373.31	74.6272	13.7695	9	7304
147	372.822	75.4241	14.1139	9	7356
148	372.926	75.4688	14.1998	9	7406
149	373.129	75.9576	14.2807	9	7471
150	373.125	75.8368	14.2096	9	7507
151	373.558	76.2164	14.9559	9	7570
152	373.897	75.735	14.9395	9	7618
153	374.159	75.4789	14.9176	9	7662
154	374.159	76.1528	14.9101	9	7709
155	374.094	76.8534	14.9904	9	7760
156	374.289	76.8652	15.3595	9	7810
157	374.14	76.9897	15.0817	9	7861
158	374.555	77.2446	15.4181	9	7910
159	374.635	77.8654	15.4478	9	7961
160	374.976	77.7393	15.4865	9	8011
161	375.082	77.4548	15.4063	9	8061
162	374.802	77.3047	15.3564	9	8111
163	374.537	77.2946	15.0669	9	8163
164	375.179	77.6149	15.3796	9	8210
165	375.226	77.2907	15.2622	9	8259
166	375.558	77.1861	15.398	9	8308
167	375.6	76.8141	15.2701	9	8360
168	374.994	76.6976	14.9246	9	8408
169	374.394	76.889	14.5277	9	8454
170	374.376	76.7204	14.7014	9	8501
171	374.473	76.8236	14.9435	9	8545
172	374.774	76.2117	14.8456	9	8589
173	374.746	75.9754	14.7917	9	8637
174	374.464	76.0042	14.9611	9	8680
175	374.119	76.3089	14.5995	9	8727
176	374.169	76.7802	14.7094	9	8769
177	374.176	76.5755	14.8614	9	8808
1	350.37	241.796	13.2175	10	9
2	350.843	239.996	14.1448	10	49
3	351.792	240.577	13.6037	10	89
4	351.109	241.701	13.3916	10	130
5	349.662	248.774	11.4408	10	168
6	349.22	250.108	11.2273	10	209
7	348.596	251.214	10.7944	10	251
8	345.005	255.884	10.0783	10	307
9	344.623	256.498	9.95138	10	349
10	347.251	254.477	9.5865	10	392
11	348.397	251.666	10.4164	10	420
12	349.458	244.648	12.0126	10	465
13	350.192	240.344	13.7104	10	515
14	350.573	239.222	14.0942	10	561
15	351.004	239.644	14.2191	10	611
16	349.922	240.871	13.5716	10	662
17	349.923	239.227	13.4945	10	710
18	349.79	239.412	13.3332	10	762
19	348.987	236.078	13.3144	10	814
20	349.379	234.757	13.7485	10	864
21	349.411	234.398	14.1729	10	915
22	349.293	234.355	13.8327	10	967
23	350.18	238.065	13.162	10	1019
24	350.119	237.789	13.4715	10	1070
25	349.145	234.765	13.5813	10	1122
26	349.233	234.962	13.4674	10	1175
27	349.491	233.85	14.6397	10	1252
28	349.255	233.217	14.5684	10	1303
29	349.441	235.7	13.3858	10	1331
30	350.002	236.001	13.5577	10	1383
31	350.291	237.422	13.3978	10	1432
32	349.643	236.632	13.5623	10	1482
33	350.058	236.362	14.7786	10	1555
34	349.191	232.656	15.3644	10	1605
35	349.783	233.674	15.0122	10	1657
36	350.074	235.193	14.6416	10	1706
37	350.295	236.85	13.8731	10	1731
38	351.72	238.116	14.0943	10	1783
39	351.564	239.53	15.1193	10	1862
40	351.192	236.621	14.9335	10	1914
41	350.853	234.231	14.7908	10	1967
42	350.917	234.547	14.7838	10	2017
43	351.057	236.277	14.0486	10	2044
44	351.572	238.254	13.5622	10	2097
45	351.475	237.12	13.5754	10	2149
46	351.167	234.256	14.8899	10	2226
47	350.76	234.52	14.9392	10	2281
48	350.617	233.746	14.5976	10	2336
49	350.418	233.832	14.5526	10	2388
50	350.65	235.757	13.6528	10	2419
51	351.198	236.15	13.4878	10	2467
52	350.808	236.886	13.6498	10	2516
53	350.639	235.285	14.5033	10	2588
54	350.169	232.823	15.1104	10	2641
55	350.55	232.594	14.9195	10	2697
56	350.659	233.42	14.3485	10	2750
57	351.118	236.84	13.7708	10	2781
58	351.092	236.787	13.516	10	2832
59	350.67	235.604	13.85	10	2882
60	351.188	235.385	14.5925	10	2949
61	350.472	232.763	14.909	10	3001
62	350.148	232.9	14.8801	10	3049
63	350.941	235.423	13.8138	10	3080
64	350.972	236.917	13.7742	10	3128
65	351.082	237.642	14.0497	10	3175
66	350.931	236.865	14.6853	10	3244
67	350.528	234.739	15.0282	10	3293
68	350.228	232.681	14.9905	10	3345
69	350.93	236.349	13.7909	10	3375
70	350.565	234.748	14.0584	10	3424
71	350.923	236.691	13.7531	10	3475
72	351.231	236.26	14.5917	10	3548
73	351.408	237.244	15.5563	10	3598
74	350.488	233.776	15.305	10	3651
75	350.549	232.742	15.2579	10	3705
76	350.818	233.477	15.1718	10	3756
77	350.842	234.72	14.9369	10	3811
78	352.355	236.7	14.821	10	3865
79	352.419	236.777	15.5871	10	3918
80	352.041	236.933	15.4921	10	3973
81	351.725	234.504	15.5373	10	4026
82	351.635	233.498	15.4937	10	4079
83	351.588	233.782	15.4634	10	4132
84	352.049	235.32	14.941	10	4183
85	352.265	235.704	14.7974	10	4237
86	352.788	235.561	15.6006	10	4296
87	352.274	239.372	15.539	10	4352
88	352.349	238.369	15.8635	10	4409
1	213.571	273.816	5.5	11	10
2	213.616	273.95	5.5	11	50
3	213.6	273.607	7.06934	11	93
4	213.279	274.048	8.00131	11	134
5	213.604	273.525	7.98466	11	172
6	213.407	273.378	7.52917	11	215
7	212.851	274.001	7.76509	11	257
8	212.956	273.922	7.91896	11	297
9	213.104	274.05	6.98522	11	339
10	212.834	273.304	7.38327	11	382
11	213.396	273.289	5.5	11	424
12	212.857	273.095	7.02295	11	471
13	212.499	272.576	8.26562	11	518
14	211.894	271.97	9.89765	11	565
15	211.868	272.704	9.82375	11	615
16	210.602	272.587	10.3852	11	667
17	211.419	274.096	8.70897	11	713
18	212.994	273.896	5.5	11	763
19	213.373	273.404	5.5	11	815
20	212.395	274.165	5.5	11	865
21	212.197	273.69	7.07318	11	918
22	212.334	273.83	5.5	11	968
23	212.901	272.747	5.5	11	1020
24	213.455	272.521	5.5	11	1071
25	213.483	272.483	5.5	11	1123
26	213.558	271.781	5.5	11	1176
27	214.159	271.118	5.5	11	1227
28	212.793	272.709	7.10721	11	1280
29	212.961	272.297	7.261	11	1334
30	213.086	271.885	7.35959	11	1386
31	213.798	271.204	6.75487	11	1435
32	214.282	270.808	7.18497	11	1484
33	214.584	271.051	7.23524	11	1532
34	214.53	270.909	7.18251	11	1580
35	214.555	271.453	7.2586	11	1630
36	211.987	269.023	6.33895	11	1679
37	213.324	273.216	5.5	11	1732
38	213.808	273.723	7.99625	11	1786
39	214.063	273.791	7.59382	11	1838
40	213.931	274.269	8.24076	11	1890
41	214.083	274.928	7.88351	11	1943
42	214.46	273.798	8.60569	11	1994
43	214.139	273.796	8.584	11	2047
44	214.065	273.6	8.78095	11	2100
45	214.231	273.437	8.34049	11	2152
46	214.526	272.837	7.18925	11	2205
47	215.363	272.18	7.15727	11	2259
48	214.202	273.192	7.9902	11	2313
49	213.767	273.548	8.13375	11	2369
50	213.686	273.776	7.57908	11	2422
51	213.731	273.964	7.59319	11	2470
52	214.23	272.9	7.66853	11	2519
53	213.879	272.176	9.67609	11	2570
54	214.893	271.327	7.5919	11	2622
55	210.57	271.375	11.7391	11	2681
1	140.309	305.631	5.5	12	11
2	140.166	307.142	5.5	12	51
3	140.126	305.191	5.5	12	90
4	140.393	305.391	5.5	12	131
5	140.709	304.548	5.5	12	171
6	140.23	304.593	5.5	12	213
7	139.932	305.403	5.5	12	255
8	139.999	305.684	5.5	12	295
9	139.863	306.527	5.5	12	337
10	139.918	306.678	5.5	12	380
11	139.699	304.482	5.5	12	425
12	139.948	304.14	5.5	12	469
13	140.739	310.205	5.5	12	516
14	140.396	310.309	5.5	12	562
15	140.54	311.353	5.5	12	612
16	140.324	312.141	5.5	12	663
17	140.602	311.219	5.5	12	711
18	140.953	310.049	5.5	12	764
19	142.279	312.491	5.5	12	816
20	143.728	315.52	5.5	12	866
21	143.798	322.399	5.5	12	916
22	148.407	322.268	5.5	12	970
23	174.186	364.655	5.5	12	1022
24	174.037	364.514	5.5	12	1073
25	173.806	364.488	5.5	12	1125
26	173.427	364.373	5.5	12	1178
27	173.543	363.804	5.5	12	1229
28	172.149	362.492	5.5	12	1278
29	173.748	363.181	5.5	12	1333
30	183.315	365.451	5.5	12	1385
31	182.808	365.998	5.5	12	1434
1	18.155	457.419	5.5	13	12
2	17.9233	457.68	5.5	13	52
3	18.0269	457.167	5.5	13	92
4	15.8871	451.956	5.5	13	133
5	15.6717	451.507	7.16615	13	174
6	17.668	454.872	5.5	13	214
7	17.5168	455.255	5.5	13	256
8	16.8839	454.47	5.5	13	296
9	16.7535	454.52	5.5	13	338
10	17.2002	454.766	5.5	13	381
11	17.2239	454.234	5.5	13	426
12	17.2431	454.043	5.5	13	470
13	17.1357	454.191	5.5	13	517
14	16.9279	454.076	5.5	13	563
15	16.2754	453.577	5.5	13	613
16	15.759	454.606	5.5	13	664
17	16.2599	453.839	5.5	13	712
18	16.892	453.99	5.5	13	765
19	16.8052	453.72	5.5	13	817
20	16.872	453.422	5.5	13	867
21	16.6243	453.234	5.5	13	917
22	16.3874	453.051	5.5	13	971
23	15.7146	452.581	5.5	13	1023
24	15.8672	452.385	5.5	13	1074
25	16.2557	452.273	6.80005	13	1127
26	16.5051	452.638	6.94256	13	1181
27	16.2478	452.06	7.23676	13	1232
28	15.6667	452.077	5.5	13	1279
29	16.0952	451.867	7.09406	13	1335
30	15.7643	452.166	6.88974	13	1387
31	16.1432	452.199	7.07675	13	1437
32	16.279	452.26	6.91538	13	1486
33	16.4897	452.65	7.65986	13	1534
34	16.7002	452.944	7.33726	13	1582
35	16.7101	452.822	7.23842	13	1632
36	16.7077	453.045	7.17798	13	1682
37	16.6997	452.961	7.39499	13	1735
38	17.0811	453.297	7.62788	13	1787
39	17.1345	453.261	7.71424	13	1839
40	17.1563	452.801	7.93829	13	1892
41	17.1553	453.327	7.8755	13	1945
42	16.2398	452.161	7.62205	13	1996
43	16.8446	452.845	7.56861	13	2049
44	16.2353	452.471	7.51755	13	2102
45	16.8226	453.719	7.63513	13	2153
46	16.4725	452.594	7.47743	13	2207
47	16.4079	452.544	7.66593	13	2261
48	16.1469	451.932	7.27277	13	2315
49	16.1654	451.897	7.51791	13	2371
50	15.896	452.287	7.15578	13	2424
51	16.078	452.531	7.47317	13	2472
52	16.3119	452.449	7.59936	13	2520
53	16.3844	453.55	7.49907	13	2569
54	16.5702	452.888	7.31719	13	2624
55	16.1754	452.992	7.19788	13	2680
56	15.9932	451.719	7.32647	13	2733
57	16.0441	452.471	7.4754	13	2786
58	15.9071	451.739	7.59046	13	2836
59	15.713	451.647	7.44909	13	2887
60	15.6283	451.473	7.64849	13	2936
61	15.6628	451.223	7.51534	13	2984
62	15.2176	450.615	7.39027	13	3033
63	15.7435	451.961	7.2731	13	3084
64	15.7193	452.005	7.50083	13	3130
65	15.7138	451.542	7.95112	13	3178
66	15.0915	450.302	8.02355	13	3225
67	14.9671	450.667	8.25157	13	3274
68	15.1056	450.749	7.98923	13	3324
69	15.2959	451.149	7.7541	13	3378
70	14.9499	450.639	8.12808	13	3428
71	15.7464	451.398	7.92228	13	3478
72	15.7513	451.184	8.34199	13	3529
73	15.3211	450.149	8.96244	13	3580
74	14.9282	449.412	9.29422	13	3633
75	16.0201	450.939	8.86642	13	3684
76	15.8307	450.656	8.64284	13	3738
77	16.2172	451.326	8.61945	13	3792
78	16.545	452.7	9.08312	13	3847
79	16.6593	451.937	9.25229	13	3901
80	16.8621	452.203	8.97484	13	3955
81	16.0505	450.416	9.26226	13	4010
82	16.1826	451.104	9.16827	13	4062
83	16.0247	450.768	8.72476	13	4115
85	16.7156	451.49	8.75521	13	4220
86	16.1785	450.593	8.92866	13	4275
87	16.5873	450.99	8.86508	13	4334
88	16.5457	451.198	9.08175	13	4390
89	16.5425	451.182	8.84261	13	4446
90	16.3926	451.322	8.39577	13	4502
92	16.6114	451.322	8.88298	13	4613
93	16.4208	451.333	8.87863	13	4668
94	16.6085	451.19	9.10117	13	4723
95	16.7213	451.632	8.6973	13	4779
96	16.9634	452.662	8.49981	13	4834
97	17.2251	453.512	8.4924	13	4889
98	16.9754	453.722	8.52082	13	4943
99	17.009	452.496	8.71286	13	4998
100	17.0249	452.535	9.16861	13	5049
101	16.6091	451.317	9.21942	13	5098
102	16.5086	451.62	8.89699	13	5148
1	191.637	317.59	9.64528	14	13
2	191.788	317.297	9.30761	14	53
3	192.343	314.44	8.87706	14	94
4	192.202	315.348	9.05844	14	135
5	192.642	315.922	9.22431	14	173
6	192.237	317.068	9.69324	14	216
7	192.026	317.032	9.22117	14	258
8	191.975	317.38	9.36698	14	298
9	191.549	315.391	8.83549	14	340
10	191.365	314.306	8.77494	14	383
11	191.638	312.972	8.74648	14	427
12	191.298	311.222	8.25619	14	472
13	191.695	311.925	8.42926	14	519
14	191.75	312.707	8.59077	14	564
15	191.201	312.16	8.78135	14	614
16	190.647	313.459	8.13269	14	665
17	191.116	312.621	8.47537	14	715
18	190.532	310.577	8.54627	14	767
19	190.993	310.75	8.56509	14	819
20	191.297	311.765	8.47694	14	869
21	191.467	313.24	9.12811	14	920
22	190.984	316.621	9.64086	14	973
23	190.922	316.243	9.30095	14	1024
24	191.411	314.475	9.12599	14	1075
25	191.19	311.459	9.25501	14	1128
26	190.17	309.27	8.67838	14	1179
27	190.291	309.729	8.67369	14	1230
28	191.156	311.32	9.36348	14	1282
29	191.285	313.287	9.67005	14	1336
30	191.174	313.165	9.48891	14	1388
31	191.414	315.13	9.81066	14	1438
32	191.735	315.394	9.97146	14	1487
33	192.258	313.996	9.69698	14	1535
34	191.876	313.607	9.42577	14	1583
35	191.213	312.462	9.56592	14	1633
36	191.624	314.476	9.99384	14	1683
37	191.81	314.009	9.45621	14	1736
38	192.405	313.523	9.88388	14	1788
39	192.599	315.864	10.1911	14	1840
40	193.176	314.983	10.07	14	1893
41	193.262	315.082	10.0466	14	1946
42	192.768	314.785	9.61352	14	1997
43	192.287	313.428	9.4559	14	2050
44	192.278	312.69	9.61525	14	2103
45	192.456	313.858	9.9252	14	2154
46	192.847	313.676	9.82238	14	2208
47	193.266	314.225	10.0808	14	2262
48	192.958	315.12	9.91672	14	2316
49	192.941	315.188	9.79632	14	2372
50	192.685	314.421	9.69903	14	2425
51	192.874	314.168	10.0225	14	2473
52	192.987	314.489	10.1018	14	2521
53	193.243	313.147	10.2591	14	2571
54	193.206	313.707	10.2041	14	2625
55	192.832	315.397	10.2787	14	2682
56	192.524	314.56	9.89765	14	2734
57	192.455	312.939	10.1532	14	2787
58	192.616	312.861	10.1887	14	2837
59	193.089	312.397	10.0688	14	2888
60	193.107	312.586	10.2007	14	2937
61	192.778	313.357	10.2221	14	2985
62	192.391	315.071	10.1152	14	3034
63	192.284	315.084	10.2806	14	3085
64	192.32	315.407	10.1657	14	3131
65	192.497	314.306	10.2293	14	3179
66	192.705	314.697	10.3812	14	3226
67	192.984	314.024	10.3047	14	3275
68	192.716	313.729	10.0681	14	3325
69	191.937	312.816	9.99267	14	3379
70	192.095	314.515	10.127	14	3429
71	192.063	314.113	10.1774	14	3479
72	192.326	314.454	10.3265	14	3530
73	193.131	313.72	10.3768	14	3581
74	193.305	312.837	10.3216	14	3632
75	193.214	314.816	10.4948	14	3686
76	193.017	315.668	10.5585	14	3739
77	193.207	314.229	10.3407	14	3793
78	193.458	315.47	10.6742	14	3848
79	193.815	315.688	10.8211	14	3900
80	194.063	315.944	10.8078	14	3956
81	194.535	314.879	10.9257	14	4008
82	194.191	315.498	10.8274	14	4063
83	193.804	315.653	10.6936	14	4116
84	193.853	314.985	10.7332	14	4166
85	193.904	315.933	10.8962	14	4221
86	194.055	315.191	11.0742	14	4276
87	194.331	315.876	10.9377	14	4335
88	194.13	316.293	11.2451	14	4391
89	193.861	315.963	10.9697	14	4447
90	193.533	315.24	10.6959	14	4503
91	193.596	314.632	10.6789	14	4557
92	193.876	315	10.7607	14	4615
93	193.932	314.688	11.0936	14	4670
94	193.967	314.582	11.2399	14	4725
95	193.732	314.674	11.1116	14	4781
96	193.129	314.432	10.8506	14	4836
97	193.343	314.623	10.8096	14	4891
98	193.444	314.167	10.7689	14	4945
99	193.589	314.139	11.041	14	5000
100	193.921	313.456	10.7966	14	5051
101	194.126	312.65	10.9518	14	5100
102	193.546	313.088	11.1837	14	5150
103	193.388	312.792	11.1058	14	5197
104	193.207	313.104	10.9373	14	5243
105	193.19	312.213	10.9257	14	5293
106	193.413	313.286	11.2228	14	5341
107	193.094	314.647	12.0017	14	5390
108	193.539	314.541	11.9913	14	5437
109	193.206	314.762	11.2897	14	5488
110	193.072	314.014	11.2406	14	5537
111	193.305	314.187	11.2557	14	5587
112	193.477	313.849	11.3546	14	5634
113	194.013	313.968	11.5532	14	5682
114	194.251	313.827	11.6038	14	5731
115	194.557	314.582	12.172	14	5779
116	193.939	315.607	12.4537	14	5829
117	193.855	315.421	11.6337	14	5883
118	193.609	316.153	12.069	14	5935
120	194.432	315.9	12.4178	14	6029
121	195.046	315.994	12.1806	14	6077
1	196.983	342.578	11.5796	15	14
2	197.896	342.985	11.835	15	55
3	196.721	342.491	11.3215	15	95
4	197.092	342.816	11.1497	15	136
5	197.497	342.538	11.2215	15	175
6	197.754	342.51	11.0667	15	217
7	197.07	341.777	10.7784	15	259
8	197.076	342.395	10.8713	15	299
9	196.499	342.506	10.957	15	341
10	196.615	341.829	11.0669	15	384
11	196.56	341.671	11.0008	15	428
12	196.619	341.584	10.7726	15	473
13	196.751	341.4	10.6618	15	520
14	196.536	341.576	11.0117	15	566
15	196.209	341.779	11.4874	15	616
16	195.569	342.138	10.7821	15	668
17	196.293	341.585	11.1145	15	717
18	196.107	340.981	10.8399	15	770
19	196.233	341.013	10.6488	15	821
20	195.816	341.032	10.7996	15	871
21	195.545	341.541	11.1371	15	922
22	196.182	341.632	11.1607	15	974
23	195.492	340.96	10.6584	15	1025
24	194.981	340.936	10.9235	15	1076
25	195.071	341.364	10.968	15	1129
26	196.53	341.231	11.0163	15	1182
27	196.554	341.252	11.1353	15	1233
28	196.194	341.181	11.1959	15	1283
29	195.97	341.181	11.3466	15	1337
30	196.098	340.937	11.2792	15	1389
31	196.291	340.984	11.3682	15	1439
32	196.582	340.975	11.3895	15	1488
33	196.855	341.282	11.2701	15	1536
34	196.878	342.005	11.9253	15	1584
35	196.778	341.693	12.133	15	1634
36	196.342	342.213	12.2768	15	1684
37	196.623	341.562	11.5917	15	1737
38	197.226	341.823	11.9846	15	1791
39	197.522	342.457	12.0222	15	1843
40	197.947	342.472	12.0288	15	1895
41	198.242	342.75	12.2009	15	1948
42	197.893	343.236	11.7784	15	1999
43	197.307	342.427	11.1946	15	2051
44	197.166	342.561	11.7335	15	2104
45	197.559	342.27	11.7153	15	2155
46	197.433	341.979	11.6932	15	2209
47	197.952	342.261	11.9539	15	2263
48	197.839	342.305	11.7863	15	2317
49	197.689	342.112	11.9028	15	2373
50	197.095	341.36	11.3859	15	2426
51	197.083	341.797	11.9129	15	2474
52	197.477	341.357	11.771	15	2523
53	197.781	341.326	12.1984	15	2573
54	197.857	341.26	12.5005	15	2626
55	197.683	340.801	12.5149	15	2683
56	197.551	341.314	11.9613	15	2735
57	197.129	341.194	12.12	15	2788
58	197.119	340.937	11.8739	15	2838
59	196.912	340.835	12.0897	15	2890
60	197.004	340.452	12.4008	15	2938
61	197.268	340.909	12.1448	15	2986
62	197.319	340.787	12.3017	15	3035
63	196.807	340.589	12.2505	15	3087
64	196.261	340.017	12.1089	15	3133
65	196.451	340.098	12.1821	15	3181
66	197.052	340.659	12.5813	15	3228
67	197.194	340.352	12.4194	15	3276
68	196.825	340.341	12.2346	15	3328
69	196.498	340.222	12.2557	15	3381
70	196.366	340.688	12.356	15	3431
71	196.107	340.172	12.1411	15	3481
72	196.457	340.339	12.3431	15	3532
73	197.091	340.435	12.637	15	3582
74	198.102	340.778	12.8203	15	3635
75	197.901	340.775	12.7602	15	3688
76	197.383	341.368	12.7393	15	3740
77	197.789	341.491	12.7054	15	3795
78	198.09	341.344	12.5834	15	3850
79	198.359	341.701	12.84	15	3903
80	198.22	341.502	12.9732	15	3958
81	198.59	341.569	12.9243	15	4011
82	198.999	341.923	13.1318	15	4065
83	198.592	342.045	13.262	15	4118
84	198.414	341.552	13.1211	15	4168
85	198.108	341.25	13.0766	15	4223
86	198.53	341.423	13.2925	15	4278
87	198.784	341.146	12.9868	15	4337
88	199.031	341.26	13.3744	15	4393
89	197.97	341.919	13.3424	15	4449
90	197.178	341.251	13.0827	15	4505
91	197.772	341.163	12.8946	15	4559
92	197.667	341.012	12.8377	15	4617
93	197.647	341.004	13.1089	15	4672
94	198.633	341.307	13.5132	15	4727
95	198.47	341.068	13.3175	15	4783
96	198.362	341.274	13.404	15	4838
97	197.782	340.807	13.319	15	4893
98	197.612	340.473	13.0011	15	4946
99	198.102	340.287	12.9844	15	5001
100	198.312	340.584	13.0472	15	5052
101	198.582	340.291	13.0301	15	5101
102	198.47	340.587	13.2886	15	5151
103	198.395	340.377	13.3362	15	5198
104	197.704	340.363	13.1226	15	5244
105	197.278	339.728	13.2157	15	5294
106	197.714	339.959	13.3794	15	5342
107	198.217	339.946	13.7062	15	5391
108	198.259	339.667	13.6047	15	5438
109	197.759	340.246	13.6726	15	5489
110	197.626	340.347	13.8552	15	5538
111	197.308	339.52	13.1955	15	5589
112	197.416	340.065	13.2304	15	5635
113	197.731	339.983	13.4347	15	5683
114	198.237	340.467	13.5737	15	5732
115	198.774	341.068	14.5758	15	5796
116	199.256	341.244	14.5183	15	5847
117	198.825	340.957	13.7891	15	5884
118	198.18	341.278	13.6804	15	5936
119	198.985	341.292	13.7048	15	5985
120	199.189	341.577	13.988	15	6030
121	199.778	341.839	13.9414	15	6078
122	199.634	342.109	14.0698	15	6125
123	199.49	342.344	13.911	15	6171
124	198.735	341.819	13.7413	15	6219
125	198.477	341.448	13.469	15	6265
126	198.45	341.277	14.0808	15	6311
127	199.305	341.792	13.5804	15	6358
128	199.617	341.906	13.4537	15	6406
129	199.63	341.964	13.4887	15	6456
130	198.894	341.704	13.6964	15	6507
131	198.324	341.509	13.4707	15	6559
132	198.3	341.456	13.445	15	6611
133	198.682	341.578	13.6028	15	6663
134	198.944	341.553	13.4255	15	6714
135	199.319	340.719	13.5881	15	6765
136	199.035	340.891	13.876	15	6815
137	198.973	341.93	14.3979	15	6876
138	197.935	340.668	13.4786	15	6917
139	198.135	340.888	13.4589	15	6969
140	198.089	341.262	13.7121	15	7019
141	198.876	341.304	14.4622	15	7080
142	198.842	340.773	14.2227	15	7117
143	198.917	341.004	14.3676	15	7174
144	197.986	340.799	14.0076	15	7211
145	197.705	340.455	13.8283	15	7260
146	197.958	340.5	13.707	15	7313
147	198.628	340.935	14.6885	15	7374
148	198.502	340.796	14.4366	15	7424
149	198.747	340.811	14.8659	15	7475
150	198.165	340.292	14.6953	15	7525
151	198.229	341.037	14.89	15	7577
152	197.591	340.821	14.6969	15	7623
153	198.332	340.757	14.7223	15	7668
154	198.507	340.966	15.0627	15	7715
155	199.539	341.349	15.3058	15	7766
156	199.293	341.879	15.1087	15	7816
157	199.267	342.164	15.0426	15	7866
158	199.16	342.018	15.2606	15	7915
159	199.217	342.703	15.188	15	7966
160	200.51	342.159	15.1518	15	8016
161	200.205	342.074	15.085	15	8066
162	200.135	342.446	15.2136	15	8117
163	200.759	341.932	14.9961	15	8168
164	200.323	342.495	15.2472	15	8215
165	199.543	342.119	14.8193	15	8264
166	199.194	341.778	14.6213	15	8313
167	199.166	342.266	14.5811	15	8364
168	199.59	342.862	14.8671	15	8412
169	199.466	342.826	14.9978	15	8458
170	199.365	342.774	14.8649	15	8504
171	199.381	342.416	14.9147	15	8550
172	198.508	341.651	14.3934	15	8593
173	198.181	341.398	14.4075	15	8641
174	199.756	341.424	14.4481	15	8685
175	199.524	341.228	14.2243	15	8717
176	199.684	341.485	14.6468	15	8772
177	199.514	341.184	14.3685	15	8813
1	40.2531	386.781	10.4147	16	15
2	40.4615	387.283	11.447	16	54
3	44.868	387.693	11.5648	16	96
4	54.9127	387.587	11.9051	16	137
5	55.0557	386.778	11.9834	16	176
6	55.5638	386.464	11.6069	16	218
7	54.8737	387.013	11.5744	16	260
8	54.5699	387.049	11.4856	16	300
9	53.8803	387.471	11.3913	16	342
10	53.5546	386.565	11.2672	16	385
11	54.5897	386.269	11.3789	16	429
12	54.6423	385.676	11.2799	16	474
13	54.7099	385.623	11.2608	16	521
14	55.9865	386.183	10.7799	16	567
15	57.0251	389.4	10.153	16	617
16	63.3278	398.999	8.34729	16	666
17	64.5062	399.097	8.43919	16	716
18	66.3322	398.968	9.15578	16	768
19	69.5612	399.078	9.1042	16	820
20	69.7549	398.98	8.88071	16	870
21	70.1951	398.985	8.80391	16	921
22	69.4003	396.483	8.55357	16	972
23	71.6102	402.005	9.79622	16	1026
24	75.3744	407.774	9.63977	16	1077
25	86.4829	412.165	7.61897	16	1126
26	88.4522	414.115	7.73583	16	1180
27	90.9533	416.51	7.46859	16	1231
28	86.0838	409.842	7.08	16	1281
1	2.98023e-08	408.565	13.6628	17	16
2	2.98023e-08	408.67	13.3875	17	57
3	2.98023e-08	408.426	13.225	17	98
4	2.98023e-08	409.281	13.1062	17	138
5	2.98023e-08	409.802	12.3312	17	178
6	2.98023e-08	409.852	12.3958	17	220
7	2.98023e-08	410.178	12.3832	17	261
8	2.98023e-08	409.947	12.4085	17	302
9	2.98023e-08	410.686	12.3849	17	344
10	2.98023e-08	409.431	11.917	17	387
11	2.98023e-08	409.535	12.2577	17	431
12	2.98023e-08	409.349	11.9274	17	476
13	2.98023e-08	409.021	12.3466	17	523
14	2.98023e-08	409.546	12.2552	17	569
15	2.98023e-08	409.862	12.6693	17	618
16	2.98023e-08	409.949	12.223	17	670
17	2.98023e-08	409.39	12.3766	17	719
18	2.98023e-08	409.247	12.3611	17	772
19	2.98023e-08	409.225	12.1466	17	823
20	2.98023e-08	409.686	12.1711	17	873
21	2.98023e-08	409.261	12.3139	17	924
22	2.98023e-08	409.256	12.3608	17	976
23	2.98023e-08	408.781	12.3491	17	1028
24	2.98023e-08	408.702	12.482	17	1079
25	2.98023e-08	408.862	12.2343	17	1131
26	2.98023e-08	408.723	12.4523	17	1184
27	2.98023e-08	409.105	12.3673	17	1234
28	2.98023e-08	409.122	12.5065	17	1284
29	2.98023e-08	408.969	12.3873	17	1339
30	2.98023e-08	408.638	12.6677	17	1391
31	2.98023e-08	408.619	12.5355	17	1441
32	2.98023e-08	408.839	12.7591	17	1489
33	2.98023e-08	408.428	12.7674	17	1537
34	2.98023e-08	409.31	12.8194	17	1585
35	2.98023e-08	409.359	12.9023	17	1635
36	2.03412	410.607	12.4139	17	1685
37	8.20348	407.558	10.7714	17	1738
38	9.91933	406.693	11.0877	17	1790
39	10.4604	406.793	11.1103	17	1842
40	10.4024	406.932	11.1793	17	1894
41	10.9184	407.729	11.2384	17	1947
42	15.175	412.107	10.0729	17	1998
44	5.74815	379.513	18.0585	17	2127
45	6.00368	378.225	17.6313	17	2180
46	3.92338	376.45	17.6992	17	2233
47	2.98023e-08	372.215	20.0641	17	2289
48	4.04522	376.544	19.5577	17	2344
49	4.94733	378.415	17.0722	17	2394
1	150.799	454.868	13.1089	18	17
2	151.19	453.745	13.3832	18	58
3	151.47	454.942	13.2013	18	99
4	150.827	455.363	13.006	18	139
5	150.772	454.944	12.7916	18	179
6	151.284	455.454	12.8591	18	221
7	151.582	455.49	12.919	18	262
8	151.447	454.604	12.7056	18	303
9	150.916	455.411	12.9958	18	345
10	150.396	453.923	12.6607	18	388
11	149.862	453.617	12.2511	18	432
12	150.015	453.925	12.1572	18	477
13	150.807	454.962	12.4842	18	524
14	151.076	454.434	12.7579	18	570
15	150.749	455.19	13.0232	18	619
16	149.777	454.377	12.5923	18	671
17	150.24	454.556	12.526	18	720
18	150.121	454.735	12.6065	18	773
19	149.694	454.259	12.5182	18	824
20	149.269	453.007	12.8933	18	874
21	148.906	452.356	13.0064	18	925
22	149.566	452.22	13.2804	18	977
23	148.421	452.539	13.1907	18	1029
24	148.259	452.631	13.0475	18	1080
25	150.54	455.066	12.8821	18	1132
26	150.828	455.315	12.7711	18	1185
27	150.929	454.347	13.0563	18	1235
28	150.805	453.756	13.2027	18	1285
29	150.902	453.982	13.1457	18	1340
30	150.746	453.939	13.1531	18	1392
31	149.094	452.703	13.3237	18	1442
32	148.84	452.598	13.3977	18	1490
33	149.826	453.018	13.0499	18	1538
34	150.712	452.868	13.8733	18	1586
35	151.486	454.467	13.6784	18	1636
36	151.236	454.753	13.6643	18	1686
37	151.181	455.052	13.3452	18	1739
38	151.082	455.158	13.3699	18	1792
39	151.427	455.542	13.2028	18	1844
40	151.267	454.698	13.1193	18	1896
41	152.475	455.836	13.9477	18	1949
42	152.193	455.048	13.8125	18	2000
43	151.909	455.442	13.7484	18	2052
44	151.497	455.166	13.2694	18	2105
45	151.29	454.939	13.2339	18	2157
46	151.306	454.972	13.3767	18	2211
47	151.969	455.587	13.1561	18	2265
48	152.172	455.192	13.5215	18	2319
49	152.191	455.073	13.4186	18	2374
50	151.877	455.318	13.3444	18	2427
51	151.629	455.076	13.0122	18	2475
52	151.058	454.5	13.0981	18	2524
53	151.446	454.83	13.1738	18	2574
54	152.038	454.875	13.339	18	2627
55	151.13	452.562	13.8516	18	2684
56	152.175	454.222	13.6175	18	2736
57	150.355	452.248	13.7259	18	2789
58	149.594	452.412	13.5332	18	2839
59	149.304	452.533	13.3855	18	2891
60	150.036	452.374	13.1331	18	2939
61	150.591	451.914	13.8722	18	2987
62	150.806	451.633	13.4947	18	3036
63	149.639	451.773	13.4047	18	3088
64	149.138	451.732	13.4027	18	3134
65	149.089	451.664	13.6707	18	3182
66	149.787	453.338	13.1368	18	3229
67	150.416	453.227	13.4974	18	3278
68	151.748	454.465	13.6314	18	3329
69	151.045	454.474	13.5275	18	3382
70	150.179	453.477	13.2958	18	3432
71	150.821	454.593	13.3609	18	3483
72	150.754	454.759	13.3662	18	3533
73	151.449	455.19	13.2361	18	3583
74	152.041	454.988	13.602	18	3637
75	152.015	454.579	13.9548	18	3689
76	151.191	453.056	14.2065	18	3741
77	150.549	453.685	13.9522	18	3796
78	151.912	455.661	13.6462	18	3851
79	152.309	455.956	13.3322	18	3904
80	152.529	455.765	13.4225	18	3959
81	152.959	455.602	13.814	18	4012
82	153.262	455.428	14.02	18	4066
83	152.992	455.021	13.9726	18	4119
84	152.57	454.862	13.7056	18	4170
85	152.44	455.602	13.3041	18	4224
86	152.654	456.061	13.6041	18	4281
87	152.86	455.482	13.2897	18	4338
88	153.428	455.289	13.83	18	4395
89	153.217	455.216	13.9087	18	4451
90	150.935	453.098	14.0261	18	4507
91	150.767	453.087	14.1112	18	4561
92	150.863	453.425	13.7081	18	4618
93	150.818	453.299	13.8715	18	4673
94	150.617	453.014	14.4727	18	4747
95	151.389	452.832	14.7033	18	4802
96	151.47	452.23	14.253	18	4859
97	151.349	452.566	14.1874	18	4894
98	150.109	452.4	14.1957	18	4948
99	150.138	452.444	13.7828	18	5003
100	150.98	452.649	13.4523	18	5053
101	151.635	451.948	13.59	18	5102
102	152.784	453.69	14.3137	18	5170
103	152.542	453.648	14.4711	18	5217
104	152.114	453.622	14.4044	18	5263
105	151.481	453.644	13.6461	18	5296
106	150.118	452.172	14.3999	18	5359
107	151.502	452.656	13.8776	18	5392
108	151.422	452.008	14.4758	18	5456
109	151.965	451.934	14.6341	18	5505
110	152.266	452.546	14.6676	18	5557
111	151.83	453.406	14.61	18	5605
112	151.825	453.254	14.6015	18	5652
113	152.308	455.264	14.119	18	5684
114	152.519	454.335	14.8038	18	5748
115	153.15	454.723	15.0983	18	5797
116	153.313	454.162	15.2743	18	5848
117	152.952	454.266	15.2138	18	5897
118	152.565	454.41	15.3076	18	5949
119	152	455.394	14.6235	18	5996
120	152.217	455.103	14.7209	18	6042
121	151.674	454.43	14.8896	18	6091
122	153.239	455.223	15.1045	18	6139
123	153.603	454.829	15.0754	18	6186
124	153.225	454.884	15.0039	18	6230
125	152.469	454.669	14.7957	18	6277
126	152.809	453.433	14.9629	18	6324
127	152.86	455.925	14.6133	18	6374
128	152.74	454.989	14.8747	18	6421
129	153.276	455.125	14.9572	18	6474
130	153.345	454.906	14.8315	18	6525
131	152.919	454.627	15.033	18	6576
132	152.624	455.125	14.8007	18	6626
133	152.892	455.242	14.9139	18	6679
134	152.288	455.596	14.8256	18	6730
135	152.858	455.909	15.0285	18	6779
136	153.081	455.105	15.2172	18	6829
137	152.882	454.708	15.3666	18	6878
138	152.165	454.562	14.9509	18	6931
139	151.899	454.52	14.5554	18	6982
140	151.372	455.692	14.3964	18	7031
141	152.694	454.69	15.184	18	7081
142	152.525	454.663	15.1899	18	7128
143	152.855	454.384	15.0961	18	7175
144	152.599	454.353	15.1613	18	7224
145	151.763	454.568	14.637	18	7274
146	151.713	454.395	14.3029	18	7326
147	152.714	454.648	15.0843	18	7375
148	152.581	454.843	15.085	18	7425
149	152.665	454.46	15.2083	18	7476
150	153.005	454.197	15.2393	18	7526
151	153.035	454.541	15.5398	18	7578
152	152.674	454.751	15.4608	18	7624
153	152.346	455.025	15.1545	18	7669
154	152.69	455.68	15.3089	18	7716
155	153.584	455.208	15.5171	18	7767
156	153.687	455.189	15.5979	18	7817
157	153.705	455.164	15.7162	18	7867
158	152.87	454.348	15.9124	18	7916
159	153.757	454.968	15.9775	18	7967
160	153.496	455.724	15.5781	18	8017
161	153.616	456.026	15.8648	18	8067
162	153.745	456.077	15.5656	18	8118
163	154.279	455.116	15.6874	18	8169
164	154.339	455.217	15.7181	18	8216
165	154.206	455.188	15.7559	18	8265
166	153.364	455.547	15.1731	18	8315
167	152.854	454.82	15.2197	18	8365
168	153.565	455.55	15.207	18	8413
169	153.553	452.996	15.3602	18	8459
170	154.368	455.145	15.5751	18	8505
171	153.822	454.899	15.643	18	8551
172	153.105	454.921	15.4336	18	8595
173	152.948	454.957	15.2536	18	8642
174	152.638	454.553	15.2049	18	8686
175	153.394	453.31	15.3328	18	8731
176	152.25	452.971	15.5002	18	8773
177	152.881	452.769	15.7851	18	8814
1	399.68	352.141	5.5	19	18
2	398.945	353.441	5.5	19	59
3	398.123	360.548	5.5	19	100
4	395.132	363.905	5.5	19	140
5	396.286	365.972	5.5	19	180
6	395.41	369.342	5.5	19	222
7	396.016	368.341	5.5	19	263
8	396.398	366.258	5.5	19	304
9	396.601	366.768	5.5	19	346
10	395.54	368.486	5.5	19	389
11	395.691	367.916	5.5	19	433
12	395.218	367.19	5.5	19	478
13	394.861	367.726	5.5	19	526
14	395.223	367.722	5.5	19	572
15	395.38	367.541	5.5	19	621
16	394.766	368.372	5.5	19	673
17	395.012	368.006	5.5	19	722
18	394.76	368.131	5.5	19	775
19	394.628	368.209	5.5	19	827
20	394.889	367.861	5.5	19	877
21	394.7	368.382	5.5	19	928
22	394.584	367.986	5.5	19	980
23	394.63	368.34	5.5	19	1032
24	394.75	368.316	5.5	19	1083
25	394.403	368.44	5.5	19	1135
26	394.421	368.208	5.5	19	1188
27	394.284	368.12	5.5	19	1238
28	394.141	368.26	5.5	19	1289
29	394.973	367.049	5.5	19	1343
30	395.396	365.032	5.5	19	1394
31	395.373	365.105	5.5	19	1444
32	395.137	367.314	5.5	19	1492
33	396.102	364.927	5.5	19	1540
34	395.801	365.745	5.5	19	1588
35	395.225	368.352	5.5	19	1638
1	327.37	469.339	5.5	20	19
2	328.938	469.506	5.5	20	60
3	328.446	469.428	5.5	20	101
4	327.76	469.437	5.5	20	141
5	328.662	469.091	5.5	20	181
6	329.93	469.258	5.5	20	223
7	329.674	469.236	5.5	20	264
8	330.014	468.876	5.5	20	305
9	329.206	469.218	5.5	20	347
10	328.545	468.955	5.5	20	390
11	329.133	468.434	5.5	20	434
12	327.84	469.016	5.5	20	479
13	329.188	468.435	5.5	20	527
14	329.51	468.593	5.5	20	573
15	329.351	468.826	5.5	20	622
16	327.056	469.066	5.5	20	674
17	326.312	468.879	5.5	20	723
18	327.819	468.214	5.5	20	776
19	328.666	468.512	5.5	20	828
20	329.293	468.361	5.5	20	878
21	329.668	468.141	5.5	20	930
22	328.137	468.465	5.5	20	982
23	328.313	468.27	5.5	20	1034
24	328.652	468.015	5.5	20	1085
25	329.442	467.888	5.5	20	1137
26	328.078	468.057	5.5	20	1190
27	329.11	467.938	5.5	20	1240
28	329.312	467.933	5.5	20	1291
29	328.635	467.96	5.5	20	1345
30	327.488	467.708	5.5	20	1396
31	327.663	467.725	5.5	20	1446
32	326.888	468.04	5.5	20	1494
33	329.398	467.896	5.5	20	1542
34	332.493	467.765	5.5	20	1590
35	331.553	468.367	5.5	20	1640
36	330.67	468.487	5.5	20	1689
37	332.111	468.202	5.5	20	1742
38	329.285	468.676	5.5	20	1795
39	329.827	468.722	5.5	20	1847
40	330.652	468.913	5.5	20	1899
41	333.358	468.657	5.5	20	1952
42	330.905	469.149	5.5	20	2003
43	331.592	469.111	5.5	20	2055
44	332.037	468.414	5.5	20	2108
45	330.256	468.687	5.5	20	2160
46	334.33	468.161	5.5	20	2214
47	333.169	468.512	5.5	20	2269
48	334.629	468.052	5.5	20	2322
49	334.528	468.504	5.5	20	2377
50	333.937	468.029	5.5	20	2429
51	330.697	468.373	5.5	20	2477
52	328.753	468.34	5.5	20	2526
53	328.846	468.623	5.5	20	2575
54	328.501	468.304	5.5	20	2628
55	329.81	468.511	5.5	20	2685
56	330.381	468.081	5.5	20	2738
57	329.773	467.857	5.5	20	2790
58	330.332	467.687	5.5	20	2840
59	330.236	467.657	5.5	20	2892
60	330.383	467.837	5.5	20	2940
61	330.493	467.505	5.5	20	2989
62	329.997	467.737	5.5	20	3038
63	329.395	467.591	5.5	20	3090
64	328.273	467.405	5.5	20	3136
65	329.112	467.345	5.5	20	3184
66	329.008	467.439	5.5	20	3232
67	329.836	467.552	5.5	20	3281
68	330.37	467.262	5.5	20	3331
69	347.675	465.699	5.5	20	3384
70	350.002	467.5	10.8313	20	3440
71	350.378	467.544	11.5722	20	3490
72	350.482	467.645	10.9239	20	3541
73	350.789	467.677	10.6715	20	3591
74	349.659	468.128	12.0247	20	3645
75	337.646	462.31	8.2743	20	3692
76	329.906	452.102	5.5	20	3743
77	329.198	453.637	5.5	20	3798
78	330.697	450.528	5.5	20	3853
79	330.173	451.662	5.5	20	3906
80	330.748	451.683	5.5	20	3961
81	330.374	453.436	5.5	20	4014
82	331.66	451.639	5.5	20	4068
83	329.975	454.927	5.5	20	4121
84	329.712	454.564	5.5	20	4172
85	329.651	453.965	5.5	20	4226
86	329.747	454.106	5.5	20	4283
87	330.098	453.434	5.5	20	4339
88	330.549	452.918	5.5	20	4396
89	330.141	454.218	5.5	20	4453
90	329.595	454.569	5.5	20	4509
91	329.256	453.888	5.5	20	4563
92	328.978	453.939	5.5	20	4620
93	329.541	452.937	7.49113	20	4678
94	316.013	451.621	5.5	20	4730
95	317.297	452.205	5.5	20	4786
96	317.067	452.268	5.5	20	4840
97	325.146	448.185	8.34588	20	4899
98	324.909	447.326	8.48832	20	4953
1	298.267	403.628	7.58872	21	20
2	298.642	403.567	8.33466	21	61
3	298.514	403.369	7.81197	21	102
4	297.882	403.652	7.96218	21	142
5	298.317	403.829	8.19298	21	182
6	298.807	403.61	7.8583	21	224
7	298.432	403.533	8.07312	21	265
8	298.322	403.323	7.91099	21	306
9	298.283	403.477	7.70758	21	348
10	297.487	403.288	7.70816	21	391
11	297.54	402.85	8.11454	21	435
12	297.754	402.875	7.56137	21	480
13	298.023	402.836	7.46464	21	528
14	297.385	403.166	8.49778	21	574
15	297.649	403.195	8.438	21	623
16	296.818	403.278	7.25603	21	675
17	297.383	402.921	7.47343	21	724
18	297.38	403.061	8.01376	21	777
19	297.561	402.815	7.8541	21	829
20	297.679	402.766	7.856	21	879
21	297.387	402.695	8.08293	21	931
22	297.371	402.611	8.06879	21	983
23	297.356	402.588	7.37537	21	1035
24	297.098	402.693	7.98875	21	1086
25	297.412	402.845	7.75722	21	1138
26	297.191	402.691	7.89661	21	1191
27	297.468	402.486	8.12341	21	1241
28	297.277	402.359	8.043	21	1292
29	297.642	402.278	8.22407	21	1346
30	297.644	402.377	8.31961	21	1398
31	297.069	402.964	8.50876	21	1447
32	297.453	402.765	8.37193	21	1496
33	298.118	402.742	8.04673	21	1544
34	297.705	402.736	8.43024	21	1593
35	297.61	402.876	8.76014	21	1642
36	298.198	403.022	8.48852	21	1691
37	297.861	402.909	8.34045	21	1744
38	298.339	403.443	8.74104	21	1798
39	298.667	403.624	8.55697	21	1849
40	298.569	403.441	8.76949	21	1901
41	298.659	403.72	8.99352	21	1955
42	298.507	404.061	8.80464	21	2006
43	298.822	403.912	8.00744	21	2057
44	298.462	403.555	8.60661	21	2109
45	298.421	403.885	8.24333	21	2162
46	298.424	403.597	8.49839	21	2217
47	298.852	403.34	8.16174	21	2270
48	298.639	403.374	8.56236	21	2324
49	298.578	403.257	8.63345	21	2379
50	298.428	403.156	8.35887	21	2431
51	298.047	403.061	8.66685	21	2479
52	298.207	403.032	8.56709	21	2528
53	298.018	402.774	8.71459	21	2577
54	298.414	402.291	8.54913	21	2630
55	298.266	402.316	8.6456	21	2687
56	298.323	402.311	8.49015	21	2740
57	297.92	402.53	8.86898	21	2792
58	297.756	402.748	8.84465	21	2843
59	297.95	402.767	8.79086	21	2895
60	298.13	402.43	8.55655	21	2943
61	297.83	402.113	8.88168	21	2992
62	298.114	401.751	8.64998	21	3041
63	298.308	401.756	8.3909	21	3093
64	298.305	401.467	8.41478	21	3138
65	297.911	401.922	8.72639	21	3186
66	298.159	402.096	8.63258	21	3234
67	297.965	402.087	8.73918	21	3283
68	297.988	401.954	8.94184	21	3334
69	297.893	402.041	8.82641	21	3386
70	297.982	402.232	8.75562	21	3435
71	298.17	401.919	8.5983	21	3486
72	298.409	402.242	8.48658	21	3536
73	297.918	402.498	9.26831	21	3590
74	298.94	402.248	8.85763	21	3639
75	298.134	402.485	9.46797	21	3697
76	298.177	402.748	9.53045	21	3749
77	298.892	403.089	9.02475	21	3800
78	299.295	403.324	9.153	21	3856
79	298.825	403.479	9.41024	21	3912
80	299.089	403.452	9.43629	21	3967
81	299.714	403.351	9.3875	21	4020
82	300.387	402.964	9.2492	21	4071
83	299.503	403.086	9.55464	21	4127
84	299.508	402.885	9.48433	21	4177
85	299.936	402.975	8.98762	21	4228
86	300.007	403.141	9.03139	21	4285
87	300.151	403.035	8.85067	21	4341
88	299.254	402.912	9.79098	21	4401
89	299.097	402.878	9.49851	21	4459
[truncated: 6,825 more rows]
