# Supplementary material for: Functional visualization of NK cell-mediated killing of metastatic single tumor cells
Source: eLife journal article supplement (doi:10.7554/elife.76269), 2022-02-03
Supplement: supp [file nk_pos_6.xlsx]

## Sheet: Sheet1
1	217.481	47.1001	7.12751	1	0
2	217.236	47.0717	5.5	1	34
3	217.311	47.1323	6.75157	1	69
4	217.289	46.9311	7.15538	1	104
5	217.412	46.9428	8.01451	1	140
6	217.062	47.2506	7.63345	1	177
7	216.531	47.38	7.40627	1	215
8	216.749	47.2045	7.17173	1	254
9	217.146	47.1526	7.41932	1	293
10	217.844	46.7762	7.76221	1	332
11	217.611	46.9002	7.96659	1	373
12	217.502	47.2485	8.31288	1	414
13	217.463	47.7299	8.5382	1	455
14	217.833	48.4398	8.77966	1	497
15	217.744	47.7473	8.3893	1	540
16	217.943	47.558	7.75492	1	584
17	218.51	47.6557	7.91488	1	628
18	218.688	47.9177	8.47154	1	673
19	217.99	48.2087	8.48642	1	720
20	218.528	48.8485	9.05157	1	767
21	219.003	48.7963	8.90422	1	816
22	218.928	48.7212	8.52365	1	864
23	218.82	48.7136	8.43623	1	912
24	219.175	48.4611	8.48942	1	959
25	219.39	48.3187	8.93691	1	1008
26	218.147	48.6576	8.63286	1	1058
27	217.963	48.9417	8.12248	1	1108
28	217.659	48.8664	7.68147	1	1157
29	217.618	48.5483	7.67026	1	1207
30	218.251	48.0799	7.70525	1	1255
31	218.75	47.8215	8.27124	1	1305
32	218.431	47.9897	8.73525	1	1352
33	217.629	48.1541	7.87143	1	1399
34	218.073	48.2107	8.37389	1	1449
35	217.643	47.9241	7.95818	1	1496
36	217.931	47.6764	7.93155	1	1544
37	217.969	47.4044	8.25655	1	1592
38	217.806	47.3962	8.17397	1	1640
39	217.786	47.5897	8.88277	1	1687
40	217.05	47.646	8.27721	1	1739
41	217.071	47.4887	8.13534	1	1787
42	217.345	47.3389	8.44654	1	1840
43	217.605	47.0549	8.07174	1	1891
44	217.872	47.0126	8.43148	1	1943
45	217.678	46.968	8.66739	1	1993
46	217.411	47.2645	8.88882	1	2043
47	217.094	47.3521	8.65259	1	2095
48	217.031	47.4011	8.84631	1	2144
49	217.836	47.041	8.7736	1	2192
50	217.717	46.7987	9.03138	1	2240
51	218.149	46.4769	9.06059	1	2291
52	217.752	46.4806	9.33032	1	2343
53	219.22	46.9525	9.73343	1	2393
54	219.671	46.6972	9.91382	1	2442
55	219.718	47.0076	9.91491	1	2488
56	225.211	43.3921	7.8219	1	2533
1	79.5202	109.965	9.35393	2	1
2	80.1358	109.546	9.47303	2	35
3	79.6155	109.8	9.76393	2	70
4	79.2266	109.42	9.6142	2	105
5	79.6363	108.491	9.09475	2	141
6	79.8117	108.283	9.12527	2	178
7	80.0726	108.25	8.99921	2	216
8	80.1307	108.376	8.96938	2	255
9	80.3216	108.578	9.31033	2	294
10	79.8101	108.989	9.55614	2	333
11	79.5123	108.608	9.25464	2	374
12	79.8589	108.667	9.01966	2	415
13	80.0274	108.591	9.20945	2	456
14	80.2892	108.98	9.53251	2	498
15	80.6212	109.168	9.74533	2	541
16	80.3436	109.651	9.93919	2	585
17	80.7912	109.989	9.77914	2	629
18	80.1501	110.256	10.1409	2	674
19	80.7189	113.366	9.90794	2	721
20	81.1493	114.22	8.97034	2	768
21	84.9624	123.1	5.5	2	815
22	83.4392	122.198	5.5	2	863
23	83.2917	121.63	5.5	2	911
24	84.6628	122.899	5.5	2	958
25	84.9978	123.464	5.5	2	1007
26	84.9716	123.399	5.5	2	1057
27	85.3533	123.465	5.5	2	1107
28	83.8629	122.359	5.5	2	1156
29	83.8533	122.906	5.5	2	1206
30	85.1021	123.913	5.5	2	1254
31	85.5742	124.337	5.5	2	1304
32	80.8268	117.018	8.48175	2	1353
33	80.3942	110.071	9.26206	2	1400
34	80.2725	109.74	9.24181	2	1450
35	80.0389	110.57	9.65253	2	1497
36	80.0464	110.553	10.0534	2	1545
37	79.6733	111.626	10.1406	2	1593
38	79.5555	110.154	9.50743	2	1641
39	79.7339	110.078	9.59061	2	1688
40	79.6001	109.972	9.78445	2	1740
41	79.9327	113.021	10.2846	2	1788
42	77.2162	117.574	5.5	2	1838
43	72.4056	118.409	5.5	2	1889
44	81.0002	113.002	5.5	2	1941
45	84.774	111.546	5.5	2	1991
46	85.5151	110.591	5.5	2	2041
47	82.5767	120.836	5.5	2	2093
48	81.3414	119.646	5.5	2	2142
49	82.8689	121.251	5.5	2	2190
50	100.493	132.336	5.5	2	2238
51	101.61	130.468	5.5	2	2289
52	100.913	128.842	5.5	2	2340
53	102.934	125.851	5.5	2	2389
54	102.931	123.784	5.5	2	2438
55	103.102	124.781	5.5	2	2485
56	101.378	118.424	5.5	2	2530
57	101.543	118.247	5.5	2	2575
58	102.895	121.246	5.5	2	2620
59	102.539	121.354	5.5	2	2662
60	103.041	122.311	5.5	2	2704
61	103.318	122.526	5.5	2	2744
62	102.764	121.635	5.5	2	2785
63	101.517	118.618	5.5	2	2825
64	101.972	118.766	5.5	2	2865
65	102.364	119.616	5.5	2	2904
66	102.094	119.197	5.5	2	2943
67	102.294	119.388	5.5	2	2982
68	101.629	118.31	5.5	2	3020
69	101.282	118.339	5.5	2	3058
70	103.601	127.002	5.5	2	3098
71	104.163	128.415	5.5	2	3137
72	103.94	127.227	5.5	2	3174
73	102.967	123.284	5.5	2	3211
74	103.741	126.19	5.5	2	3248
75	103.013	123.027	5.5	2	3285
76	103.026	123.388	5.5	2	3320
77	104.09	125.872	5.5	2	3359
78	103.334	122.672	5.5	2	3397
79	101.362	118.45	5.5	2	3436
80	101.064	118.261	5.5	2	3476
81	101.168	118.09	5.5	2	3516
82	100.868	117.017	5.5	2	3555
83	101.006	117.732	5.5	2	3594
84	101.178	116.886	5.5	2	3634
85	101.251	117.033	5.5	2	3672
86	101.368	118.439	5.5	2	3711
87	101.336	118.243	5.5	2	3750
88	100.852	116.958	5.5	2	3788
89	100.962	116.791	5.5	2	3826
90	101.737	117.86	5.5	2	3864
91	101.384	117.052	5.5	2	3907
92	100.653	116.355	5.5	2	3950
1	206.729	53.0482	14.0183	3	2
2	204.824	51.6925	13.2569	3	36
3	201.552	50.5835	12.5041	3	71
4	201.344	50.7323	12.6684	3	106
5	202.838	50.2635	12.7689	3	142
6	202.103	49.5751	12.6492	3	179
7	201.1	46.8107	12.6061	3	217
8	201.717	47.2388	12.6376	3	256
9	200.928	47.1553	12.8726	3	295
10	199.882	47.7672	12.6467	3	334
11	199.808	48.1122	12.3987	3	375
12	199.898	48.2688	12.3124	3	416
13	203.898	51.5413	13.0697	3	457
14	209.159	53.704	14.7291	3	527
15	203.006	51.3926	13.0485	3	542
16	203.21	51.2233	12.9471	3	586
17	200.727	50.1983	12.8772	3	630
18	202.486	51.7457	13.0844	3	675
19	206.687	51.4195	14.4987	3	722
20	210.524	50.7383	14.8516	3	800
1	211.124	79.4205	13.6109	4	3
2	212.238	81.4936	13.4483	4	37
3	212.487	80.8541	14.0657	4	72
4	211.112	79.6193	13.6076	4	107
5	210.397	76.1957	13.8087	4	143
6	210.533	76.8633	13.6424	4	180
7	210.947	75.376	14.575	4	244
8	211.699	81.5776	13.6862	4	257
9	211.646	82.6679	14.0614	4	296
10	211.344	80.7504	13.752	4	335
11	210.059	80.8783	13.4252	4	376
12	210.124	79.1444	13.5825	4	417
13	210.512	78.3885	14.3826	4	486
14	211.197	79.2843	14.4366	4	528
15	211.985	79.9353	14.8097	4	571
16	212.643	82.3345	14.9621	4	613
17	212.322	83.0049	14.7728	4	657
18	211.818	81.0503	14.7761	4	706
19	210.558	80.9954	13.8873	4	723
20	211.324	79.8827	14.5382	4	802
21	212.119	80.1567	14.4867	4	849
22	212.849	82.1212	14.3914	4	897
23	213.042	80.4405	14.9254	4	944
24	212.669	82.0219	14.893	4	991
25	211.501	80.2746	14.5827	4	1042
26	210.987	81.1673	14.2036	4	1060
27	211.632	80.8587	14.0546	4	1110
28	212.265	81.5473	14.4449	4	1189
29	213.105	80.3311	14.6714	4	1238
30	212.923	81.1167	14.5447	4	1287
31	212.358	79.6876	14.5453	4	1338
32	211.117	78.5142	14.0031	4	1355
33	211.247	78.9668	13.9211	4	1401
34	211.516	76.9925	14.7544	4	1479
35	212.268	81.3667	14.3245	4	1530
36	211.069	81.8571	13.8501	4	1546
37	211.303	82.2176	13.8114	4	1594
38	209.814	81.4333	13.4134	4	1642
39	209.461	81.1612	13.4329	4	1689
40	210.152	80.0063	13.8436	4	1741
41	210.781	81.6596	14.0369	4	1789
42	212.888	76.5529	15.6568	4	1876
43	212.987	79.977	14.6652	4	1926
44	211.272	80.4999	13.9449	4	1944
45	210.082	79.6723	13.768	4	1994
46	210.483	78.017	14.3304	4	2073
47	210.222	78.6864	14.4857	4	2126
1	315.162	5.06161	5.5	5	4
2	314.864	5.54191	5.5	5	38
3	315.064	3.79046	5.5	5	73
4	315.022	2.98486	5.5	5	108
5	314.727	3.50285	5.5	5	144
6	314.703	4.02771	5.5	5	181
7	314.674	4.55343	5.5	5	218
8	314.556	4.803	5.5	5	258
9	314.732	4.1379	5.5	5	297
10	314.904	2.78084	5.5	5	336
11	314.928	3.65882	5.5	5	377
12	315.23	5.47206	5.5	5	418
13	314.72	5.4923	5.5	5	458
14	314.538	5.26746	5.5	5	499
15	315.141	4.69476	5.5	5	543
16	315.444	3.58625	5.5	5	587
17	316.431	2.40451	5.5	5	631
18	316.213	3.12204	5.5	5	676
19	316.427	3.01696	5.5	5	724
20	316.23	2.79215	5.5	5	769
21	316.915	2.98023e-08	7.15212	5	825
22	317.037	2.98023e-08	7.33227	5	872
23	317.294	2.98023e-08	7.7485	5	922
24	317.814	2.98023e-08	7.96111	5	968
1	387.426	108.533	5.5	6	5
2	387.666	108.108	5.5	6	40
3	387.515	108.664	5.5	6	75
4	387.354	108.543	5.5	6	110
5	387.433	109.071	5.5	6	146
6	387.34	108.618	5.5	6	183
7	387.628	108.285	5.5	6	219
8	387.812	108.688	5.5	6	259
9	388.016	109.034	5.5	6	298
10	387.652	109.026	5.5	6	337
11	387.602	109.274	5.5	6	378
12	387.69	109.461	5.5	6	419
13	388.047	109.514	5.5	6	459
14	388.435	109.725	5.5	6	501
15	388.5	109.187	5.5	6	545
16	388.236	109.589	5.5	6	589
17	388.37	109.996	5.5	6	633
18	388.431	110.241	5.5	6	677
19	388.341	110.146	5.5	6	725
20	388.234	109.74	5.5	6	770
21	388.329	109.521	5.5	6	818
22	388.25	109.534	5.5	6	866
23	388.471	110.174	5.5	6	914
24	388.38	110.395	5.5	6	961
25	387.921	109.99	5.5	6	1011
26	387.251	108.76	5.5	6	1063
27	386.688	107.823	5.5	6	1112
28	386.967	107.856	5.5	6	1161
29	386.929	108.397	5.5	6	1210
30	386.752	108.133	5.5	6	1259
31	386.765	108.494	5.5	6	1308
32	386.434	108.757	5.5	6	1358
33	386.94	108.299	5.5	6	1404
34	386.57	107.83	5.5	6	1453
35	386.97	108.286	5.5	6	1501
36	386.961	108.337	5.5	6	1550
37	386.385	108.277	5.5	6	1597
38	386.341	107.982	5.5	6	1645
39	386.226	108.266	5.5	6	1693
40	386.543	107.852	5.5	6	1744
41	387.278	108.267	5.5	6	1792
42	386.743	107.466	5.5	6	1843
43	386.759	108.066	5.5	6	1894
44	386.622	108.275	5.5	6	1947
45	385.799	107.739	5.5	6	1995
46	387.389	109.058	5.5	6	2044
47	386.976	108.372	5.5	6	2096
48	386.398	107.71	5.5	6	2146
49	386.65	107.877	5.5	6	2194
50	386.707	108.033	5.5	6	2242
51	387.486	109.178	5.5	6	2293
52	386.792	108.191	5.5	6	2345
53	387.402	108.755	5.5	6	2394
1	272.599	219.824	5.5	7	6
2	273.402	220.387	5.5	7	41
3	273.189	220.006	5.5	7	76
4	272.591	219.467	5.5	7	111
5	272.46	219.502	5.5	7	148
6	272.576	219.774	5.5	7	185
7	272.913	219.779	5.5	7	222
8	272.791	219.056	5.5	7	262
9	272.748	219.331	5.5	7	301
10	271.767	218.993	5.5	7	340
11	272.163	218.765	5.5	7	381
12	272.128	218.716	5.5	7	422
13	272.56	219.34	5.5	7	463
14	272.808	219.877	5.5	7	505
15	273.385	219.995	5.5	7	549
16	273.089	220.482	5.5	7	593
17	273.293	220.241	5.5	7	637
18	273.28	220.445	5.5	7	681
19	273.217	220.213	5.5	7	729
20	273.602	220.513	5.5	7	774
21	273.907	221.149	5.5	7	823
22	274.657	222.388	5.5	7	870
23	274.277	221.824	5.5	7	920
24	274.111	221.65	5.5	7	966
25	273.83	221.543	5.5	7	1016
26	274.265	221.294	5.5	7	1069
27	273.815	221.083	5.5	7	1118
28	274.097	221.054	5.5	7	1165
29	273.763	220.951	5.5	7	1213
30	273.57	220.642	5.5	7	1262
31	273.342	220.123	5.5	7	1311
32	273.218	220.319	5.5	7	1361
33	263.571	221.872	5.5	7	1407
34	273.385	220.601	5.5	7	1456
35	273.808	220.571	5.5	7	1504
36	273.204	220.312	5.5	7	1553
37	272.848	219.906	5.5	7	1600
38	271.18	224.051	6.58109	7	1648
39	271.668	224.02	6.62262	7	1696
40	269.902	220.012	5.5	7	1746
41	271.219	218.908	5.5	7	1794
42	271.346	218.722	5.5	7	1845
43	270.201	218.657	5.5	7	1896
44	270.221	218.112	5.5	7	1949
45	270.073	218.046	5.5	7	1998
46	277.757	229.734	10.5753	7	2050
47	282.502	235.939	14.2474	7	2103
48	284.352	235.114	15.4244	7	2177
49	283.389	233.919	15.8845	7	2226
50	284.481	229.106	16.0312	7	2276
51	290.015	224.293	17.4391	7	2326
53	269.349	226.302	13.7122	7	2399
54	270.44	226.794	8.39274	7	2445
55	270.92	227.219	8.58512	7	2492
56	271.583	227.461	8.91876	7	2538
57	271.354	227.968	8.80584	7	2582
58	271.13	227.977	8.86924	7	2626
59	296.167	213.142	19.0455	7	2692
60	296.144	213.676	20.1835	7	2733
61	296.368	213.308	20.1157	7	2775
63	310.672	244.557	20.5342	7	2854
65	322.893	255.941	13.0668	7	2925
1	370.427	235.747	5.5	8	7
2	369.987	235.959	5.5	8	42
3	370.263	235.61	5.5	8	77
4	370.018	235.091	5.5	8	112
5	369.539	234.752	5.5	8	149
6	369.66	235.18	5.5	8	186
7	369.507	235.307	5.5	8	223
8	369.835	235.564	5.5	8	263
9	369.509	235.496	5.5	8	302
10	370.108	235.287	5.5	8	341
11	370.121	235.311	5.5	8	382
12	370.262	235.329	5.5	8	423
13	370.703	236.137	5.5	8	464
14	370.352	236.529	5.5	8	506
15	370.064	236.095	5.5	8	550
16	370.508	236.391	5.5	8	594
17	370.622	236.026	5.5	8	638
18	370.342	235.813	5.5	8	682
19	370.61	236.1	5.5	8	730
20	370.259	236.202	5.5	8	775
21	370.311	236.663	5.5	8	824
22	371.007	237.326	5.5	8	871
23	370.912	237.204	5.5	8	921
24	370.78	236.771	5.5	8	967
25	370.642	236.319	5.5	8	1017
26	370.34	236.622	5.5	8	1070
27	370.963	237.401	5.5	8	1119
28	370.511	237.602	5.5	8	1166
29	369.812	236.911	5.5	8	1214
30	369.963	236.262	5.5	8	1263
31	369.919	235.639	5.5	8	1312
32	369.77	235.624	5.5	8	1362
33	370.111	236.111	5.5	8	1408
34	369.841	236.373	5.5	8	1457
35	369.28	236.351	5.5	8	1505
36	369.014	235.906	5.5	8	1554
37	369.59	235.649	5.5	8	1601
38	369.884	235.501	5.5	8	1649
39	369.514	235.6	5.5	8	1697
40	369.22	235.516	5.5	8	1747
41	368.861	235.503	5.5	8	1795
42	369.79	236.225	5.5	8	1846
43	369.483	235.675	5.5	8	1897
44	369.836	235.499	5.5	8	1950
45	369.964	235.284	5.5	8	1999
46	369.513	235.292	5.5	8	2048
47	369.244	235.462	5.5	8	2099
48	368.925	235.267	5.5	8	2149
49	369.053	235.296	5.5	8	2197
50	369.056	234.791	5.5	8	2245
51	369.255	234.537	5.5	8	2296
52	369.118	234.442	5.5	8	2347
53	369.258	235.446	5.5	8	2396
54	369.487	235.555	5.5	8	2444
55	368.626	235.241	5.5	8	2491
56	369.978	236.21	5.5	8	2537
57	370.205	236.131	5.5	8	2581
58	369.762	235.399	6.89381	8	2627
59	369.776	235.52	7.48238	8	2668
60	369.891	236.314	6.82552	8	2710
61	370.127	236.739	5.5	8	2749
62	370.51	237.621	5.5	8	2790
63	370.561	237.33	5.5	8	2831
64	370.06	236.615	7.14708	8	2872
65	370.598	236.621	6.88182	8	2911
66	370.852	236.456	7.12788	8	2950
67	370.734	237.255	5.5	8	2989
68	370.657	237.36	5.5	8	3027
69	370.337	237.557	5.5	8	3065
70	370.078	236.789	5.5	8	3105
71	370.619	236.588	5.5	8	3144
72	370.942	236.909	5.5	8	3181
73	370.497	236.923	5.5	8	3217
74	370.71	237.316	5.5	8	3254
75	370.429	237.039	5.5	8	3290
76	370.861	237.356	5.5	8	3327
77	370.727	236.893	5.5	8	3365
78	370.15	235.741	6.76892	8	3403
79	370.057	235.594	7.03564	8	3443
80	370.213	236.214	5.5	8	3483
81	369.997	236.22	5.5	8	3522
82	369.526	236.326	5.5	8	3561
83	369.632	236.199	5.5	8	3600
84	369.754	235.681	5.5	8	3640
85	369.754	235.378	6.91744	8	3679
86	369.376	235.031	7.16697	8	3718
87	369.028	235.535	5.5	8	3755
88	368.903	235.465	5.5	8	3794
89	368.595	235.324	5.5	8	3832
90	368.69	234.891	6.90827	8	3873
91	368.795	234.496	7.15762	8	3916
92	369.599	234.39	7.52152	8	3958
93	369.475	234.423	7.54886	8	4001
94	369.532	234.543	7.2621	8	4043
95	369.566	234.899	7.56736	8	4087
96	369.592	235.073	8.026	8	4130
97	370.253	235.316	7.71883	8	4171
98	370.544	235.211	7.76195	8	4213
99	370.478	235.049	7.98025	8	4255
100	370.744	235.4	7.91896	8	4298
101	370.734	235.863	7.77406	8	4339
102	370.672	236.411	7.43659	8	4380
103	371.043	236.546	7.66874	8	4419
104	371.226	236.558	7.75848	8	4458
105	370.833	235.94	7.92587	8	4498
106	371.582	236.081	7.64737	8	4536
107	371.377	236.455	7.54384	8	4575
108	371.341	236.821	7.80295	8	4614
109	371.855	237.434	7.13025	8	4652
110	372.002	237.361	7.20599	8	4689
111	371.588	236.788	7.40657	8	4728
112	370.985	235.56	7.58592	8	4768
113	371	235.408	7.72837	8	4807
114	370.467	235.226	7.59298	8	4846
115	369.852	235.471	7.39907	8	4885
116	370.243	235.701	7.25449	8	4922
117	369.836	235.356	7.77927	8	4959
118	370.022	234.917	7.63948	8	4996
119	370.673	235.094	7.62744	8	5036
120	370.709	235.24	7.78878	8	5076
121	370.586	235.684	7.5985	8	5114
122	370.372	235.566	7.35129	8	5152
123	370.184	235.549	7.36156	8	5188
124	370.628	235.757	7.39684	8	5226
125	370.715	235.226	7.63976	8	5263
126	371.097	235.32	7.32059	8	5301
127	370.88	235.103	7.6949	8	5339
128	370.958	235.534	7.64805	8	5377
129	370.432	235.378	7.67345	8	5415
130	370.765	235.247	7.76012	8	5452
131	370.418	235.202	7.66924	8	5493
132	370.611	234.975	7.81177	8	5534
133	370.637	234.552	8.04139	8	5576
134	370.607	234.888	8.06747	8	5616
135	370.672	235.599	8.09461	8	5657
136	370.771	235.945	8.08267	8	5696
137	370.813	236.048	8.38217	8	5734
138	371.744	236.214	8.18123	8	5777
139	371.525	235.653	8.34848	8	5818
140	371.777	235.49	8.64827	8	5861
141	371.85	236.176	8.57683	8	5903
142	371.604	236.653	8.49559	8	5945
143	371.722	236.766	8.52153	8	5985
144	372.201	237.28	8.2712	8	6025
145	373.358	237.51	8.30703	8	6063
146	373.394	237.237	8.36409	8	6102
147	372.85	237.066	8.28133	8	6141
148	373.237	237.23	8.28576	8	6179
149	372.883	237.134	8.67891	8	6217
150	372.145	236.649	8.57629	8	6256
151	372.347	236.844	8.17084	8	6297
152	371.729	235.897	8.19536	8	6336
153	371.961	235.809	8.25959	8	6375
154	371.69	235.694	8.47803	8	6413
155	371.41	235.97	8.33385	8	6450
156	371.85	236.421	8.20368	8	6487
157	371.585	236.282	8.17218	8	6521
158	371.632	235.959	8.42584	8	6555
159	372.131	235.46	8.22106	8	6592
160	371.859	235.237	8.65745	8	6626
161	371.681	235.324	8.78503	8	6659
162	371.567	235.868	8.58345	8	6691
163	371.338	235.607	8.88938	8	6725
164	371.596	235.822	8.58879	8	6757
165	371.812	235.656	8.41221	8	6790
166	371.559	235.217	8.90239	8	6822
167	371.686	235.27	8.80952	8	6855
168	371.461	235.166	8.99704	8	6887
169	371.838	235.745	9.0415	8	6917
170	370.918	235.373	8.70824	8	6947
171	370.472	234.787	8.46788	8	6977
172	370.546	234.585	8.57327	8	7009
173	371.139	234.627	9.07615	8	7040
174	370.835	234.438	9.52583	8	7072
175	370.695	234.706	9.45721	8	7103
176	371.022	235.595	9.10054	8	7133
177	371.226	236.154	9.0225	8	7164
178	371.027	235.41	9.53669	8	7197
179	371.459	235.588	9.36411	8	7227
180	371.955	235.718	9.35533	8	7256
181	371.972	235.806	9.79097	8	7285
182	371.826	236.051	9.7417	8	7315
183	371.998	236.531	9.56517	8	7344
184	372.226	236.865	9.31399	8	7372
185	372.951	237.112	9.10274	8	7402
186	373.116	236.537	9.06153	8	7432
187	372.278	235.979	9.53483	8	7463
188	372.761	236.317	9.42041	8	7492
189	372.631	237.136	8.67267	8	7519
190	372.377	236.831	8.99076	8	7548
191	372.379	236.769	8.99723	8	7575
192	372.576	236.148	9.56123	8	7603
193	373.241	236.107	9.38698	8	7630
194	372.999	236.18	9.42782	8	7656
195	371.942	234.773	9.80391	8	7684
196	371.467	235.016	9.63077	8	7710
197	372.281	235.478	9.12137	8	7737
198	371.911	235.617	9.03134	8	7764
199	372.363	235.009	9.82868	8	7790
200	372.536	235.143	9.8425	8	7817
201	372.475	235.066	9.93762	8	7843
202	372.259	235.718	9.45209	8	7870
203	372.778	235.77	9.48243	8	7897
204	372.265	235.706	9.44828	8	7924
1	283.259	82.7118	9.20804	9	8
2	295.888	72.2079	5.5	9	39
3	298.31	67.5079	5.5	9	74
4	298.878	66.7896	5.5	9	109
5	298.45	66.7402	5.5	9	145
6	297.103	67.7437	5.5	9	182
7	296.101	78.0328	8.35792	9	224
8	295.543	80.1672	8.78895	9	264
9	291.809	84.6992	9.94746	9	304
10	294.329	82.1972	9.44754	9	343
11	295.388	81.7697	9.24271	9	383
12	296.56	78.9304	8.56216	9	424
13	292.391	83.9698	10.214	9	467
14	291.357	85.5845	10.3986	9	507
15	289.466	54.2501	25.5	9	583
16	292.989	55.5858	19.9476	9	617
17	297.564	54.486	17.8428	9	661
18	296.971	55.4591	17.6982	9	708
19	296.46	55.8755	17.5307	9	759
20	298.465	55.7793	16.3732	9	805
21	294.368	60.1817	18.5348	9	853
22	293.563	59.9298	18.7395	9	901
1	374.573	75.6883	11.0223	10	9
2	374.004	76.3718	11.3605	10	43
3	374.432	76.0771	11.3088	10	78
4	374.458	75.3516	11.0622	10	113
5	374.402	75.5305	11.6118	10	150
6	374.07	75.0886	11.123	10	187
7	373.598	75.5103	11.0288	10	225
8	373.326	74.598	10.9316	10	265
9	373.466	74.1086	10.8212	10	303
10	374.081	74.789	11.0322	10	342
11	374.22	75.0042	11.17	10	385
12	374.539	75.313	11.237	10	426
13	374.699	76.1673	11.7266	10	466
14	374.61	76.7133	11.7727	10	509
15	374.679	77.151	12.0239	10	552
16	374.267	76.3468	11.6947	10	595
17	375.322	77.0737	12.5313	10	639
18	375.508	76.9289	12.0341	10	685
19	375.911	76.9803	11.9483	10	733
20	375.712	77.5163	12.0767	10	778
21	374.968	77.5878	11.6862	10	826
22	375.103	78.1234	11.4401	10	874
23	375.339	77.8953	11.5743	10	923
24	375.539	77.6132	11.8657	10	972
25	375.706	77.3966	12.0797	10	1022
26	376.641	77.1859	7.61378	10	1061
27	375.824	78.13	7.97291	10	1111
28	375.355	78.7112	7.90452	10	1159
29	374.738	77.7353	10.2431	10	1215
30	374.9	77.447	10.1844	10	1264
31	375.073	76.5295	10.1645	10	1313
32	375.603	76.9763	7.85124	10	1356
33	375.738	76.7749	7.78071	10	1402
34	377.644	75.2828	5.5	10	1451
35	381.308	73.6108	5.5	10	1499
36	381.791	73.4139	5.5	10	1548
37	390.002	87.0068	9.72139	10	1603
1	417.084	194.802	11.0892	11	10
2	417.425	193.442	10.6931	11	44
3	417.239	193.577	10.8474	11	80
4	416.884	193.22	11.2929	11	114
5	417.809	190.873	11.6706	11	151
6	417.366	190.974	11.6075	11	188
7	417.497	192.659	11.1117	11	226
8	417.831	192.557	11.0607	11	266
9	417.654	195.14	10.7093	11	305
10	417.578	199.509	9.60351	11	344
11	416.203	201.272	8.1074	11	384
12	414.903	200.009	7.00546	11	425
13	414.227	187.914	5.5	11	462
14	412.052	185.558	5.5	11	504
15	411.908	185.706	5.5	11	548
16	412.029	187.069	5.5	11	592
17	412.852	186.092	5.5	11	636
18	410.774	185.602	5.5	11	680
19	412.504	186.197	5.5	11	728
20	413.179	186.584	5.5	11	773
21	415.523	190.698	5.5	11	822
22	413.621	187.299	5.5	11	869
23	416.678	190.854	5.5	11	919
24	412.312	186.856	5.5	11	965
25	414.291	187.146	5.5	11	1015
26	414.375	186.767	5.5	11	1068
27	415.245	190.909	5.5	11	1117
28	414.714	188.63	5.5	11	1164
29	413.363	186.889	5.5	11	1212
30	414.215	186.791	5.5	11	1261
31	415.1	188.161	5.5	11	1310
32	414.928	187.214	5.5	11	1360
33	415.163	189	5.5	11	1406
34	413.482	186.273	5.5	11	1455
35	413.978	185.98	5.5	11	1503
36	413.425	186.197	5.5	11	1552
37	414.247	186.949	5.5	11	1599
38	415.161	186.94	5.5	11	1647
39	415.12	186.491	5.5	11	1695
40	414.532	185.407	5.5	11	1745
41	413.907	185.25	5.5	11	1793
42	413.228	185.757	5.5	11	1844
43	412.969	186.1	5.5	11	1895
44	413.645	186.077	5.5	11	1948
45	414.505	185.552	5.5	11	1997
46	414.261	185.002	5.5	11	2047
47	413.597	184.713	5.5	11	2098
48	413.02	184.616	5.5	11	2148
49	412.708	184.697	5.5	11	2196
50	411.582	184.943	5.5	11	2244
51	410.64	184.513	5.5	11	2295
52	410.697	184.366	5.5	11	2346
53	410.557	184.033	5.5	11	2395
54	410.527	184.376	5.5	11	2443
55	410.475	184.669	5.5	11	2490
56	410.275	184.985	5.5	11	2536
57	410.969	185.144	5.5	11	2580
58	412.677	185.463	5.5	11	2625
59	413.22	185.985	5.5	11	2667
60	413.795	185.937	5.5	11	2709
61	411.812	186.415	5.5	11	2748
62	413.634	187.081	5.5	11	2789
63	415.123	189.543	5.5	11	2830
64	415.57	188.986	5.5	11	2871
65	413.666	186.742	5.5	11	2910
66	414.766	187.102	5.5	11	2949
67	415.768	189.38	5.5	11	2988
68	413.484	186.662	5.5	11	3026
69	413.434	186.899	5.5	11	3064
70	415.294	188.466	5.5	11	3104
71	414.853	187.959	5.5	11	3143
72	415.41	188.194	5.5	11	3180
73	415.457	187.876	5.5	11	3216
74	415.266	187.822	5.5	11	3253
75	412.401	186.087	5.5	11	3289
76	409.823	185.617	5.5	11	3326
77	410.088	185.684	5.5	11	3364
78	409.928	185.108	5.5	11	3402
79	410.795	184.994	5.5	11	3442
80	410.844	185.109	5.5	11	3482
81	410.643	185.426	5.5	11	3520
82	411.634	186.066	5.5	11	3559
83	412.394	186.123	5.5	11	3599
84	413.655	186.864	5.5	11	3639
85	412.62	185.329	5.5	11	3677
86	411.871	185.367	5.5	11	3716
87	410.826	185.28	5.5	11	3754
88	412.005	185.242	5.5	11	3792
89	411.439	185.217	5.5	11	3830
90	411.762	185.594	5.5	11	3871
91	414.402	186.665	5.5	11	3914
92	415.147	187.108	5.5	11	3956
93	414.953	186.066	5.5	11	3999
94	413.952	185.812	5.5	11	4041
95	415.635	188.999	5.5	11	4085
96	413.337	185.552	5.5	11	4127
97	413.568	186.01	5.5	11	4168
98	415.364	186.453	5.5	11	4211
99	416.223	187.717	5.5	11	4252
100	415.91	186.825	5.5	11	4295
101	416.008	187.432	5.5	11	4336
102	416.267	188.132	5.5	11	4377
103	415.662	188.013	5.5	11	4417
104	416.537	187.039	5.5	11	4456
105	416.902	187.42	5.5	11	4495
106	417.507	187.903	5.5	11	4533
107	416.932	186.528	5.5	11	4572
108	416.67	187.048	5.5	11	4611
109	415.947	186.059	5.5	11	4650
110	415.428	186.993	5.5	11	4687
111	415.512	186.125	5.5	11	4726
112	416.108	185.15	5.5	11	4766
113	416.549	184.82	5.5	11	4805
114	416.512	184.855	5.5	11	4844
115	415.556	185.538	5.5	11	4883
116	415.009	185.71	5.5	11	4920
117	415.001	185.519	5.5	11	4957
118	414.482	185.423	5.5	11	4994
119	414.643	184.776	5.5	11	5034
120	414.774	184.815	5.5	11	5074
121	414.883	185.514	5.5	11	5112
122	415.067	185.794	5.5	11	5150
123	414.669	186.554	5.5	11	5186
124	414.865	186.19	5.5	11	5224
125	415.008	185.499	5.5	11	5261
126	415.336	185.355	5.5	11	5299
127	415.21	185.186	5.5	11	5337
128	415.125	185.286	5.5	11	5375
129	413.974	185.459	5.5	11	5413
130	421.187	219.211	9.85583	11	5453
131	418.117	214.231	10.6055	11	5495
132	415.98	199.533	9.72719	11	5535
133	414.797	184.434	5.5	11	5574
134	415.225	185.093	5.5	11	5614
135	415.123	184.653	5.5	11	5655
136	414.771	185.14	5.5	11	5694
137	414.62	185.665	5.5	11	5732
138	416.154	186.062	5.5	11	5775
139	416.189	185.688	5.5	11	5815
140	414.788	184.964	5.5	11	5859
141	412.537	184.932	7.25575	11	5902
142	412.153	185.301	7.39793	11	5944
143	414.376	186.293	5.5	11	5983
144	414.734	186.127	5.5	11	6022
145	414.392	186.07	5.5	11	6061
146	414.443	185.996	5.5	11	6099
147	414.347	185.612	5.5	11	6138
148	414.069	185.657	5.5	11	6176
149	412.856	185.439	5.5	11	6215
150	413.316	185.814	5.5	11	6253
151	412.99	185.315	5.5	11	6295
152	412.824	185.008	5.5	11	6334
153	413.685	185.023	5.5	11	6373
154	413.371	185.506	5.5	11	6411
155	412.838	185.428	5.5	11	6448
156	412.026	185.61	5.5	11	6485
157	411.709	185.542	5.5	11	6518
158	413.09	185.571	5.5	11	6553
159	415.682	186.785	5.5	11	6589
160	415.201	186.078	5.5	11	6622
161	413.331	184.962	5.5	11	6656
162	413.747	185.322	5.5	11	6688
163	412.503	185.069	5.5	11	6721
164	412.937	185.171	5.5	11	6754
165	413.375	185.191	5.5	11	6787
166	414.174	184.997	5.5	11	6820
167	414.517	185.454	5.5	11	6852
168	414.043	185.114	5.5	11	6884
169	413.021	185.097	5.5	11	6915
170	412.047	184.995	5.5	11	6945
171	412.643	184.934	5.5	11	6975
172	413.129	184.472	5.5	11	7006
173	414.046	184.875	5.5	11	7038
174	413.751	184.976	5.5	11	7067
175	413.961	185.502	5.5	11	7098
176	413.194	185.815	5.5	11	7129
177	413.59	186.25	5.5	11	7161
178	414.398	186.105	5.5	11	7193
179	415.26	186.496	5.5	11	7224
180	414.723	185.419	5.5	11	7254
181	415.692	187.372	5.5	11	7282
182	414.33	186.978	5.5	11	7312
183	414.465	187.67	5.5	11	7341
184	414.134	187.156	5.5	11	7369
185	414.854	186.646	5.5	11	7400
186	414.509	186.127	5.5	11	7430
187	414.707	186.048	5.5	11	7459
188	415.067	186.671	5.5	11	7488
189	414.822	186.862	5.5	11	7517
190	415.349	187.691	5.5	11	7546
191	415.283	187.094	5.5	11	7573
192	416.086	187.103	5.5	11	7600
193	416.485	187.881	5.5	11	7627
194	416.66	191.458	5.5	11	7654
195	414.337	185.892	5.5	11	7681
196	413.025	185.538	5.5	11	7708
197	411.915	185.209	5.5	11	7735
198	412.353	185.24	5.5	11	7762
199	412.879	184.521	5.5	11	7787
200	413.182	184.479	5.5	11	7814
201	413.083	184.35	5.5	11	7841
202	412.623	184.607	5.5	11	7867
203	412.507	184.489	5.5	11	7895
204	412.6	184.753	5.5	11	7922
205	412.772	184.471	5.5	11	7950
206	413.246	184.152	5.5	11	7976
207	413.222	183.824	5.5	11	8004
208	412.562	184.287	5.5	11	8030
209	412.492	184.253	5.5	11	8055
210	411.963	184.485	5.5	11	8079
211	412.328	184.658	5.5	11	8107
212	412.938	184.208	5.5	11	8132
213	413.66	184.177	5.5	11	8158
214	413.866	184.437	5.5	11	8184
215	413.743	184.958	5.5	11	8214
216	413.2	185.105	5.5	11	8243
217	412.894	185.364	5.5	11	8272
218	413.653	185.444	5.5	11	8302
219	413.716	185.254	5.5	11	8336
220	414.283	185.397	5.5	11	8369
221	414.306	185.57	5.5	11	8402
222	415.059	186.58	5.5	11	8433
223	416.974	188.795	5.5	11	8464
224	414.634	186.758	5.5	11	8496
225	414.931	186.526	5.5	11	8527
226	414.549	186.04	5.5	11	8556
227	415.165	185.826	5.5	11	8586
228	414.726	185.985	5.5	11	8615
229	414.651	186.448	5.5	11	8643
230	414.085	186.661	5.5	11	8672
231	413.844	185.983	5.5	11	8700
232	414.563	185.78	5.5	11	8727
233	415.052	185.47	5.5	11	8753
234	417.171	187.681	5.5	11	8779
235	416.767	187.469	5.5	11	8804
236	414.231	185.595	5.5	11	8830
237	415.832	187.388	5.5	11	8856
238	416.693	188.189	5.5	11	8880
239	417.522	189.374	5.5	11	8903
240	417.005	187.9	5.5	11	8927
241	414.47	184.905	5.5	11	8949
1	423.521	14.5299	13.1275	12	11
2	424.271	13.5555	13.2342	12	45
3	422.702	13.8585	13.0092	12	81
4	421.91	13.6009	13.3347	12	115
5	424.104	13.8666	13.1575	12	152
6	424.631	13.6996	13.1302	12	189
7	424.903	13.238	13.3164	12	227
8	424.592	13.2801	13.5824	12	267
9	423.055	13.6525	13.4349	12	306
10	421.969	13.7864	13.3133	12	345
11	422.194	14.0788	13.5233	12	386
12	424.301	13.3779	13.5001	12	427
13	426.058	13.3631	13.3822	12	468
14	425.136	13.4608	14.228	12	508
15	425.562	13.3539	13.9832	12	551
16	424.361	13.2517	14.1034	12	596
17	423.188	13.8622	14.3562	12	660
18	425.549	13.9515	13.9589	12	684
19	427.648	13.6325	13.758	12	732
20	430.491	13.0776	13.5187	12	777
21	429.896	13.2361	13.4517	12	828
22	429.306	13.4824	13.5986	12	876
23	427.235	13.9851	13.6071	12	924
24	426.71	13.3227	14.0004	12	971
25	425.439	14.8186	13.7501	12	1021
26	427.76	14.2428	13.4878	12	1071
27	426.563	14.7102	13.7367	12	1121
28	426.164	14.1617	13.5205	12	1170
29	425.688	14.072	13.6523	12	1218
30	426.551	13.1199	13.6571	12	1266
31	424.073	13.5487	13.9041	12	1314
32	428.776	12.2219	13.5755	12	1363
33	430.476	12.149	13.2656	12	1409
34	430.408	12.1087	13.261	12	1458
35	429.74	11.918	13.1051	12	1508
36	425.983	11.6084	13.8691	12	1556
37	427.235	12.0103	13.7064	12	1604
38	427.515	12.1235	13.631	12	1651
39	420.02	6.08658	20.4902	12	1726
41	419.215	2.98023e-08	25.5	12	1837
43	412.388	2.98023e-08	25.5	12	1939
1	323.234	148.599	13.3429	13	12
2	322.676	150.606	13.7418	13	46
3	324.324	145.557	11.7812	13	79
4	322.547	144.974	13.4426	13	116
5	321.065	146.908	13.8964	13	153
6	320.94	147.852	14.0244	13	190
7	320.382	148.663	14.9564	13	247
8	320.745	149.505	14.6249	13	286
9	321.883	147.305	13.3433	13	307
10	322.847	145.641	13.1237	13	346
11	322.142	146.285	13.5002	13	387
12	321.391	147.24	13.7459	13	428
13	325.367	145.822	8.78614	13	465
14	322.45	143.349	5.5	13	503
15	322.179	143.252	5.5	13	547
16	320.964	142.739	5.5	13	591
17	320.642	142.911	5.5	13	635
18	321.184	144.981	5.5	13	679
19	318.68	144.057	5.5	13	727
21	316.214	146.72	5.5	13	820
22	315.856	147.164	5.5	13	868
23	315.769	147.17	5.5	13	917
24	315.878	147.125	5.5	13	963
25	315.653	147.179	5.5	13	1013
26	315.709	146.647	5.5	13	1066
27	316.174	146.543	5.5	13	1115
28	316.023	146.072	5.5	13	1163
1	240.449	373.505	5.5	14	13
2	240.624	373.234	5.5	14	47
3	239.916	374.021	5.5	14	82
4	239.42	374.485	5.5	14	117
5	239.492	375.167	5.5	14	154
6	238.821	375.439	5.5	14	192
7	238.58	376.996	5.5	14	229
8	238.273	378.121	5.5	14	269
9	237.999	379.038	5.5	14	308
10	238.382	380.008	5.5	14	347
11	238.674	379.317	5.5	14	388
12	238.589	380.058	5.5	14	429
13	239.005	380.494	5.5	14	470
14	239.416	378.26	5.5	14	511
15	239.619	377.302	5.5	14	554
16	239.783	377.536	5.5	14	598
17	239.809	381.203	5.5	14	641
18	240.235	385.817	5.5	14	688
19	236.597	393.638	5.5	14	737
20	238.379	394.609	5.5	14	782
21	245.025	397.164	5.5	14	831
22	250.582	392.888	5.5	14	879
23	253.066	392.281	5.5	14	927
24	253.301	391.772	5.5	14	974
25	253.725	391.849	5.5	14	1024
1	241.3	418.961	5.5	15	14
2	241.391	418.802	5.5	15	48
3	241.689	414.364	5.5	15	83
4	241.5	416.746	5.5	15	118
5	240.714	419.396	5.5	15	155
6	239.133	422.787	5.5	15	193
7	239.502	422.693	5.5	15	230
8	240.663	419.664	5.5	15	270
9	240.646	419.366	5.5	15	309
10	240.807	417.907	5.5	15	348
11	240.122	420.07	5.5	15	389
12	240.131	420.685	5.5	15	430
13	240.395	420.363	5.5	15	471
14	240.3	421.521	5.5	15	512
15	240.972	420.511	5.5	15	555
16	241.85	417.546	5.5	15	599
17	242.068	415.638	5.5	15	642
18	242.116	415.704	5.5	15	689
19	242.244	416.612	5.5	15	738
20	242.401	417.069	5.5	15	783
21	242.381	418.709	5.5	15	832
22	242.558	418.885	5.5	15	880
23	242.558	418.035	5.5	15	928
24	242.438	418.894	5.5	15	975
25	242.805	418.32	5.5	15	1025
26	242.466	418.138	5.5	15	1073
27	241.324	422.485	5.5	15	1124
28	242.322	417.772	5.5	15	1173
29	242.274	416.36	5.5	15	1222
30	241.112	423.601	5.5	15	1271
31	241.222	421.072	5.5	15	1320
32	239.068	424.544	5.5	15	1368
33	241.605	418.856	5.5	15	1413
34	241.756	418.71	5.5	15	1462
35	241.741	418.097	5.5	15	1513
36	241.741	417.662	5.5	15	1560
37	241.724	417.572	5.5	15	1608
38	241.495	418.28	5.5	15	1656
39	241.433	417.706	5.5	15	1703
40	241.156	418.483	5.5	15	1753
41	241.251	418.002	5.5	15	1803
42	241.484	417.167	5.5	15	1856
43	241.497	416.061	5.5	15	1907
44	241.341	416.863	5.5	15	1959
45	241.303	417.038	5.5	15	2008
46	241.184	416.877	5.5	15	2056
47	241.276	416.453	5.5	15	2107
48	241.194	416.807	5.5	15	2156
49	241.015	417.456	5.5	15	2204
50	240.963	416.618	5.5	15	2252
51	240.997	417.504	5.5	15	2301
52	237.911	426.228	5.5	15	2353
53	240.882	417.158	5.5	15	2403
54	241.142	417.247	5.5	15	2451
55	241.23	417.646	5.5	15	2498
56	241.412	417.485	5.5	15	2543
57	241.629	417.665	5.5	15	2587
58	241.55	418.2	5.5	15	2632
59	241.523	418.57	5.5	15	2673
60	241.806	418.362	5.5	15	2715
61	242.111	418.498	5.5	15	2754
62	242.167	418.646	5.5	15	2794
63	242.288	418.701	5.5	15	2836
64	242.291	419.092	5.5	15	2875
65	242.086	419.941	5.5	15	2913
66	241.935	420.223	5.5	15	2955
67	242.012	420.641	5.5	15	2996
68	242.139	419.849	5.5	15	3033
69	242.316	418.612	5.5	15	3071
70	242.305	418.122	5.5	15	3111
71	242.161	418.732	5.5	15	3149
72	241.901	418.778	5.5	15	3185
73	241.831	418.285	5.5	15	3221
74	242.039	418.435	5.5	15	3258
75	241.405	419.347	5.5	15	3296
76	240.267	425.944	5.5	15	3334
77	240.214	423.463	5.5	15	3370
78	241.551	419.011	5.5	15	3408
79	241.302	419.271	5.5	15	3446
80	241.258	418.924	5.5	15	3486
81	241.673	418.021	5.5	15	3524
82	241.787	417.589	5.5	15	3565
83	241.663	417.395	5.5	15	3606
84	241.607	417.854	5.5	15	3646
85	241.349	418.414	5.5	15	3684
86	241.324	417.774	5.5	15	3721
87	241.22	418.669	5.5	15	3760
88	241.54	417.373	5.5	15	3799
89	241.577	417.684	5.5	15	3837
90	241.651	416.896	5.5	15	3877
91	241.8	417.448	5.5	15	3920
92	241.895	416.8	5.5	15	3964
93	241.763	418.426	5.5	15	4006
94	242.09	417.507	5.5	15	4049
95	242.359	417.288	5.5	15	4092
96	242.541	417.833	5.5	15	4133
97	242.893	417.32	5.5	15	4174
98	243.002	417.676	5.5	15	4218
99	243.193	417.987	5.5	15	4259
100	243.023	418.836	5.5	15	4303
101	243.015	418.637	5.5	15	4344
102	243.363	418.689	5.5	15	4385
103	243.731	418.431	5.5	15	4425
104	243.624	418.924	5.5	15	4463
105	243.546	419.153	5.5	15	4503
106	243.212	420.845	5.5	15	4542
107	243.333	420.014	5.5	15	4580
108	243.362	420.49	5.5	15	4619
109	243.595	419.201	5.5	15	4657
110	243.363	418.856	5.5	15	4695
111	243.268	419.272	5.5	15	4735
112	242.657	419.395	5.5	15	4775
113	242.762	419.366	5.5	15	4814
114	242.656	419.907	5.5	15	4851
115	242.834	418.658	5.5	15	4891
116	242.246	421.785	5.5	15	4929
117	242.684	418.771	5.5	15	4963
118	241.701	421.686	5.5	15	5001
119	240.513	424.682	5.5	15	5041
120	240.141	425.745	5.5	15	5080
121	242.577	418.738	5.5	15	5118
122	242.965	416.645	5.5	15	5155
123	242.869	414.936	5.5	15	5191
124	242.792	415.488	5.5	15	5229
125	242.673	416.021	5.5	15	5267
126	242.565	415.467	5.5	15	5305
127	242.527	414.702	5.5	15	5344
128	242.584	414.087	5.5	15	5381
129	242.615	414.521	5.5	15	5419
130	242.712	413.627	5.5	15	5458
131	242.614	413.883	5.5	15	5498
132	242.651	414.399	5.5	15	5537
133	242.633	414.877	5.5	15	5578
134	242.714	414.433	5.5	15	5618
135	242.848	414.931	5.5	15	5659
136	242.928	413.748	5.5	15	5698
137	243.06	413.651	5.5	15	5736
138	243.194	415.419	5.5	15	5779
139	243.231	415.454	5.5	15	5820
140	243.551	415.79	5.5	15	5863
141	243.56	415.706	5.5	15	5906
142	243.791	415.24	5.5	15	5948
143	243.801	414.977	5.5	15	5988
144	243.756	414.972	5.5	15	6027
145	243.707	415.352	5.5	15	6066
146	243.849	415.593	5.5	15	6104
147	243.679	415.801	5.5	15	6143
148	243.676	415.13	5.5	15	6182
149	243.635	414.555	5.5	15	6220
150	243.638	414.142	5.5	15	6260
151	243.477	413.632	5.5	15	6299
152	243.435	414.799	5.5	15	6338
153	243.285	414.226	5.5	15	6377
154	243.242	414.484	5.5	15	6415
155	243.409	414.681	5.5	15	6452
156	243.103	414.158	5.5	15	6488
157	243.012	413.546	5.5	15	6523
158	242.908	414	5.5	15	6557
159	242.988	413.564	5.5	15	6594
160	242.981	413.844	5.5	15	6628
161	242.913	413.221	5.5	15	6661
162	243.017	413.819	5.5	15	6693
163	243.137	413.133	5.5	15	6726
164	243.003	413.107	5.5	15	6758
165	242.899	413.631	5.5	15	6791
166	242.829	413.986	5.5	15	6824
167	242.847	413.273	5.5	15	6856
168	242.701	412.654	5.5	15	6888
169	242.945	413.484	5.5	15	6919
170	242.722	412.612	5.5	15	6948
171	242.881	413.988	5.5	15	6978
172	242.704	413.479	5.5	15	7011
173	243.087	414.424	5.5	15	7042
174	243.211	414.354	5.5	15	7073
175	243.309	414.791	5.5	15	7104
176	243.437	414.925	5.5	15	7135
177	243.426	415.129	5.5	15	7167
178	243.65	415.686	5.5	15	7199
179	243.734	416.39	5.5	15	7229
180	243.998	416.386	5.5	15	7257
181	243.958	416.518	5.5	15	7286
182	244.269	416.383	5.5	15	7317
183	244.158	416.04	5.5	15	7346
184	244.022	414.503	5.5	15	7373
185	244.214	415.409	5.5	15	7403
186	244.097	415.682	5.5	15	7434
187	244.098	415.213	5.5	15	7464
188	243.964	414.818	5.5	15	7493
189	243.918	414.556	5.5	15	7521
190	243.93	414.26	5.5	15	7550
191	243.987	414.792	5.5	15	7577
192	243.783	415.114	5.5	15	7604
193	243.837	415.023	5.5	15	7631
194	243.736	415.298	5.5	15	7658
195	243.833	415.519	5.5	15	7685
196	243.636	413.213	5.5	15	7712
197	243.183	411.226	5.5	15	7740
198	243.226	412.362	5.5	15	7766
199	243.375	412.957	5.5	15	7792
200	243.324	413.073	5.5	15	7819
201	243.561	413.042	5.5	15	7846
202	243.318	413.278	5.5	15	7873
203	243.457	413.183	5.5	15	7899
204	243.629	413.49	5.5	15	7926
205	243.655	413.631	5.5	15	7954
206	243.442	413.606	5.5	15	7980
207	243.359	412.474	5.5	15	8007
208	243.557	413.31	5.5	15	8033
209	243.548	413.86	5.5	15	8058
210	243.794	413.72	5.5	15	8083
211	243.538	413.393	5.5	15	8108
212	243.501	413.368	5.5	15	8134
213	243.616	413.126	5.5	15	8162
214	243.877	413.287	5.5	15	8190
215	244.052	414.094	5.5	15	8219
216	244.142	414.926	6.79365	15	8248
217	244.197	413.695	7.26174	15	8279
218	244.229	413.792	7.44103	15	8308
219	244.325	414.459	7.26941	15	8342
220	244.401	414.2	6.96873	15	8374
221	244.58	414.787	7.07758	15	8407
222	244.811	415.035	7.56345	15	8438
223	245.05	415.476	7.38858	15	8471
224	244.781	415.092	7.45582	15	8503
225	244.81	415.304	7.31685	15	8533
226	244.776	415.504	7.22696	15	8563
227	244.839	415.26	7.31552	15	8593
228	244.675	415.231	7.82957	15	8622
229	244.567	415.493	7.85068	15	8650
230	244.541	415.366	7.64114	15	8679
231	244.802	415.11	7.57679	15	8706
232	244.782	415.409	7.13034	15	8733
233	244.626	415.409	7.00345	15	8759
234	244.365	414.961	6.94415	15	8785
235	244.498	414.833	6.85389	15	8810
236	244.292	414.144	5.5	15	8835
237	244.161	414.293	6.87713	15	8862
238	244.032	413.963	6.99138	15	8886
239	243.86	414.178	7.06583	15	8909
240	243.984	414.423	7.42348	15	8931
241	243.855	414.212	7.41727	15	8953
1	18.3626	453.442	5.5	16	15
2	18.2642	452.5	5.5	16	49
3	18.2083	452.962	5.5	16	84
4	18.304	453.399	5.5	16	119
5	18.1885	453.64	5.5	16	156
6	18.0783	452.984	5.5	16	194
7	18.0451	453.505	5.5	16	231
8	18.1693	453.677	5.5	16	271
9	17.7262	453.077	5.5	16	310
10	18.0376	454.095	5.5	16	349
11	17.9466	454.484	5.5	16	390
12	18.6494	453.94	5.5	16	431
13	18.7907	454.039	5.5	16	472
14	18.6731	453.884	5.5	16	513
15	18.5624	453.738	5.5	16	556
16	18.7026	454.362	5.5	16	600
17	18.8702	455.689	5.5	16	643
18	19.0699	456.078	5.5	16	690
19	19.3937	455.928	5.5	16	739
20	19.5689	455.572	5.5	16	784
21	19.4402	455.841	5.5	16	833
22	19.3769	456.168	5.5	16	881
23	19.6468	456.231	5.5	16	929
24	19.6506	456.981	5.5	16	976
25	19.5652	455.621	5.5	16	1026
26	18.9821	455.566	5.5	16	1074
27	19.5766	456.005	5.5	16	1125
28	19.2576	454.843	5.5	16	1174
29	19.1084	455.336	5.5	16	1223
30	19.1265	455.359	5.5	16	1272
31	19.1815	455.956	5.5	16	1321
32	19.2005	455.379	5.5	16	1369
33	18.9933	454.498	5.5	16	1414
34	18.5948	454.175	5.5	16	1463
35	18.836	454.584	5.5	16	1514
36	18.8408	454.926	5.5	16	1561
37	18.6718	455.416	5.5	16	1609
38	18.5392	455.108	5.5	16	1657
39	18.8808	453.813	5.5	16	1704
40	20.2218	455.739	5.5	16	1754
41	18.4873	453.508	5.5	16	1804
42	18.8576	454.014	5.5	16	1857
43	18.7194	454.654	5.5	16	1908
44	18.9306	454.314	5.5	16	1960
45	18.7595	453.973	5.5	16	2009
46	18.5983	454.609	5.5	16	2057
47	18.5172	454.15	5.5	16	2108
48	18.3545	453.701	5.5	16	2157
49	18.7048	454.163	5.5	16	2205
50	19.7025	455.6	5.5	16	2253
52	21.02	455.314	5.5	16	2354
53	20.2608	454.756	5.5	16	2404
54	19.889	454.805	5.5	16	2452
56	21.2843	456.037	5.5	16	2544
57	19.9237	455.491	5.5	16	2588
1	194.378	314.854	7.38438	17	16
2	194.446	315	7.55978	17	50
3	194.244	314.833	7.55353	17	85
4	194.067	311.781	7.6555	17	120
5	194.432	311.839	8.04019	17	157
6	190.02	309.855	5.5	17	191
7	191.029	309.299	5.5	17	228
8	189.513	310.392	5.5	17	268
9	194.032	312.712	7.25443	17	311
10	194.063	312.592	7.68947	17	350
11	193.991	312.907	7.49308	17	391
12	194.534	313.496	7.92399	17	432
13	195.036	314.019	8.7867	17	473
14	194.928	313.026	8.80299	17	514
15	195.079	313.695	8.9792	17	557
16	194.567	315.795	9.40813	17	601
17	194.866	315.704	9.24209	17	644
18	195.155	315.674	8.95665	17	691
19	195.536	314.96	9.02651	17	740
20	195.907	313.177	8.45557	17	785
21	195.912	313.019	7.70271	17	834
22	195.451	313.31	7.69421	17	882
23	195.412	313.656	8.06369	17	930
24	195.59	313.502	8.09707	17	977
25	195.957	313.225	8.14052	17	1027
26	195.898	313.106	8.22795	17	1075
27	195.685	313.106	7.81701	17	1126
28	195.084	314.235	7.23757	17	1175
29	194.984	313.318	7.83109	17	1224
30	194.48	313.337	7.49287	17	1273
31	194.577	313.221	7.2142	17	1322
32	194.915	312.671	7.66934	17	1370
33	195.253	312.039	7.70939	17	1415
34	194.942	313.836	7.07099	17	1464
35	195.174	313.264	8.39363	17	1515
36	194.664	312.227	7.99752	17	1562
37	194.525	311.793	7.92085	17	1610
38	194.691	311.842	7.824	17	1658
39	194.954	311.347	7.46444	17	1705
40	195.269	311.465	8.55737	17	1755
41	195.294	310.834	8.07644	17	1805
42	195.079	312.276	8.96291	17	1858
43	194.617	313.504	8.51685	17	1909
44	194.594	312.901	8.58508	17	1961
45	195.278	310.459	6.79667	17	2006
46	195.363	310.545	6.87625	17	2054
47	195.199	311.637	8.02805	17	2109
48	194.819	312.61	8.24559	17	2158
49	194.499	311.564	8.37504	17	2206
50	194.193	312.725	8.83966	17	2254
51	194.08	314.646	9.66101	17	2305
52	194.694	312.579	9.48011	17	2357
53	194.866	312.687	9.44088	17	2407
54	197.157	310.8	7.62737	17	2449
55	195.057	313.726	9.87699	17	2501
56	194.876	314.147	9.97322	17	2545
57	194.664	314.191	10.1659	17	2590
58	194.649	313.985	9.98662	17	2633
59	195.25	314.061	10.0194	17	2675
60	196.043	314.493	9.84067	17	2716
61	195.985	315.166	10.0827	17	2756
62	195.771	315.509	10.1691	17	2796
63	195.262	316.574	10.4811	17	2838
64	195.38	316.395	10.3654	17	2877
65	195.869	315.308	9.97885	17	2915
66	197.856	313.129	7.6715	17	2953
67	197.553	312.415	7.5749	17	2994
68	196.273	310.033	5.5	17	3032
69	194.596	312.044	5.5	17	3070
70	194.966	310.42	5.5	17	3109
71	194.741	311.191	5.5	17	3147
72	196.263	310.64	7.19033	17	3184
73	196.211	311.643	7.85896	17	3220
74	196.669	308.399	5.5	17	3257
75	195.903	309.245	5.5	17	3293
76	195.486	308.184	5.5	17	3331
77	195.958	307.999	5.5	17	3368
78	195.596	310.523	7.72554	17	3407
79	194.707	314.946	9.94623	17	3450
81	195.299	313.89	9.79001	17	3527
82	193.626	311.111	5.5	17	3564
83	195.779	307.517	5.5	17	3605
84	196.288	308.228	5.5	17	3645
85	195.722	306.966	5.5	17	3681
86	196.238	307.904	5.5	17	3720
87	196.365	307.174	5.5	17	3759
88	195.741	309.719	7.52405	17	3798
89	195.648	310.117	7.65112	17	3836
90	195.849	310.409	7.55834	17	3876
91	195.262	307.065	5.5	17	3919
92	193.896	310.187	5.5	17	3962
93	195.707	307.298	5.5	17	4004
94	196.342	307.947	5.5	17	4047
95	195.927	307.717	5.5	17	4090
96	194.926	309.98	5.5	17	4132
97	196.053	313.154	10.2517	17	4177
99	196.377	312.947	9.75755	17	4263
1	166.089	316.972	11.3959	18	17
2	166.467	318.114	11.2726	18	51
3	165.427	319.068	11.5417	18	86
4	165.119	318.3	12.1727	18	122
5	165.411	318.563	11.251	18	158
6	165.275	318.137	11.4426	18	195
7	165.82	318.185	11.8712	18	233
8	166.099	317.64	11.5226	18	272
9	164.775	319.681	11.9441	18	313
10	165.438	319.017	11.5879	18	351
11	165.204	318.763	12.111	18	394
12	165.291	318.376	11.5405	18	433
13	165.711	319.016	11.282	18	474
14	165.807	319.327	11.6845	18	515
15	165.89	319.414	12.0686	18	558
16	165.842	319.004	11.9121	18	602
17	166.043	319.5	12.4866	18	645
18	166.19	318.991	12.351	18	693
19	166.072	319.192	11.8958	18	743
20	166.6	319.307	11.9092	18	788
21	167.031	319.901	11.6969	18	836
22	167.383	319.528	11.8962	18	885
23	167.059	320.29	12.022	18	934
24	166.574	320.054	12.2724	18	980
25	166.465	319.35	12.2056	18	1032
26	166.54	319.62	11.4249	18	1076
27	166.666	319.462	11.9636	18	1129
28	167.054	319.478	11.5576	18	1176
29	166.94	319.814	11.628	18	1225
30	166.857	319.102	11.9123	18	1276
31	166.03	319.139	11.8252	18	1325
32	165.98	318.645	11.7789	18	1374
33	166.161	319.381	11.368	18	1416
34	165.904	319.326	12.0567	18	1467
35	166.307	319.363	11.8595	18	1518
36	166.056	318.786	12.137	18	1565
37	165.755	319.762	12.2432	18	1615
38	165.736	318.67	11.9014	18	1661
39	166.142	318.247	11.7071	18	1707
40	165.908	318.245	11.5936	18	1758
41	166.149	318.575	11.991	18	1808
42	166.896	317.369	12.1496	18	1861
43	167.037	317.297	12.2577	18	1912
44	165.762	319.08	12.5008	18	1964
45	165.367	319.433	12.738	18	2013
46	165.58	317.518	11.882	18	2062
47	165.33	318.171	12.0097	18	2113
48	165.467	318.504	12.2601	18	2162
49	165.293	319.029	12.3314	18	2210
50	165.151	319.478	12.7418	18	2258
51	165.012	317.794	12.5826	18	2308
52	165.052	318.077	12.4635	18	2359
53	165.719	318.677	12.6359	18	2408
54	165.782	318.845	12.5157	18	2456
55	166.097	319.105	12.8311	18	2502
56	165.944	319.503	12.9837	18	2547
57	165.66	320.147	13.1768	18	2592
58	165.197	319.917	12.7712	18	2636
1	198.124	340.276	9.94579	19	18
2	198.801	341.035	10.64	19	52
3	198.615	340.491	10.3623	19	87
4	198.758	340.54	10.4883	19	121
5	198.729	340.703	10.7971	19	159
6	198.952	340.551	10.7921	19	196
7	199.336	340.777	10.8892	19	232
8	199.131	341.016	10.8445	19	273
9	198.897	340.714	11.2903	19	312
10	198.437	340.448	10.7223	19	352
11	198.723	340.423	10.4523	19	392
12	199.044	340.656	10.7923	19	434
13	199.1	340.545	10.6681	19	475
14	199.4	341.553	11.6721	19	516
15	199.901	342.228	12.2094	19	559
16	198.291	341.338	11.8201	19	603
17	198.677	342.372	12.0127	19	646
18	198.541	341.988	11.1771	19	692
19	200.197	341.023	11.1196	19	741
20	200.108	342.082	11.2228	19	786
21	200.41	341.846	11.2372	19	837
22	200.27	342.554	11.0414	19	884
23	200.059	342.275	10.9483	19	932
24	199.824	342.421	11.0859	19	979
25	200.006	342.49	10.9198	19	1029
26	200.133	342.615	11.1797	19	1078
27	200.101	342.524	11.3346	19	1128
28	199.806	342.797	11.9474	19	1178
29	199.321	342.411	11.4452	19	1227
30	198.511	342.536	11.3205	19	1275
31	199.114	341.375	10.6962	19	1324
32	199.07	341.579	10.982	19	1372
33	199.759	341.689	11.2341	19	1417
34	199.285	342.009	11.7131	19	1465
35	199.465	341.883	11.723	19	1516
36	198.32	341.1	10.9323	19	1563
37	198.892	341.155	11.0496	19	1614
38	199.014	341.382	10.7994	19	1660
39	199.352	341.336	11.1365	19	1708
40	199.113	342.031	11.3886	19	1760
41	198.992	341.797	11.9471	19	1809
42	198.964	342.478	12.1973	19	1862
43	198.598	340.936	11.4234	19	1911
44	198.111	341.1	11.0341	19	1963
45	198.857	340.68	10.9951	19	2012
46	199.154	341.057	11.2225	19	2060
47	199.141	341.759	11.4896	19	2111
48	199.115	341.249	11.7	19	2161
49	198.537	341.01	11.7021	19	2208
50	198.633	340.775	11.6775	19	2256
51	198.628	340.174	11.3054	19	2306
52	198.751	340.364	11.7803	19	2360
53	200.015	339.69	12.2072	19	2409
54	199.665	339.593	11.8897	19	2457
55	199.786	341.149	11.9627	19	2503
56	199.644	341.552	12.2594	19	2548
57	199.594	342.271	12.4841	19	2593
58	199.402	341.039	11.4267	19	2634
59	199.658	341.805	11.777	19	2677
60	200.213	341.905	12.3574	19	2718
61	200.169	342.427	12.5814	19	2758
62	200.639	341.709	12.3389	19	2798
63	200.112	342.592	12.1705	19	2840
64	200.488	342.423	12.5047	19	2879
65	200.311	342.619	11.9534	19	2917
66	200.363	342.618	12.0127	19	2958
67	200.409	341.755	12.2321	19	2999
68	200.946	341.769	12.2209	19	3037
69	200.063	342.126	11.755	19	3074
70	199.769	342.673	11.7732	19	3115
71	199.476	342.04	11.4313	19	3151
72	199.671	342.007	11.4536	19	3188
73	199.747	342.021	11.4247	19	3224
74	200.07	342.099	11.938	19	3261
75	200.552	342.023	11.882	19	3297
76	200.693	343.052	12.6065	19	3335
77	199.649	341.592	12.1701	19	3373
78	199.343	341.225	12.0042	19	3412
79	199.66	341.293	11.8026	19	3451
80	199.69	341.346	12.1209	19	3490
81	199.723	341.028	11.9721	19	3529
82	199.745	341.464	12.2678	19	3568
83	199.576	341.401	12.1446	19	3609
84	199.142	341.108	11.8791	19	3650
85	199.057	341.383	12.1575	19	3686
86	212.187	351.097	13.6	19	3723
87	212.185	351.87	13.9176	19	3764
88	212.556	351.115	13.393	19	3802
89	212.858	351.878	13.9727	19	3839
90	212.849	351.932	13.9456	19	3881
91	226.526	352.379	18.9586	19	3939
92	227.967	351.031	18.8269	19	3984
93	227.517	350.993	18.6059	19	4026
94	227.669	350.823	18.5643	19	4068
95	228.089	350.697	18.6782	19	4112
96	230.875	352.422	20.1665	19	4154
97	230.368	352.927	20.2283	19	4196
98	230.28	353.265	19.973	19	4238
99	230.86	353.649	20.0337	19	4281
100	231.835	354.426	20.4773	19	4322
101	233.563	355.887	20.828	19	4362
1	151.393	452.995	11.3245	20	19
2	153.411	453.846	11.836	20	53
3	152.985	453.731	11.7296	20	88
4	152.415	453.622	11.8299	20	124
5	152.509	454.603	11.36	20	160
6	152.735	454.32	11.2858	20	197
7	152.962	454.249	11.9773	20	235
8	153.596	453.639	11.9393	20	275
9	153.327	453.371	12.0249	20	315
10	152.66	453.382	11.9238	20	355
11	151.929	453.418	11.6739	20	393
12	152.221	454.321	11.5365	20	435
13	152.568	454.244	11.9132	20	477
14	153.226	454.445	12.3695	20	518
15	153.753	454.34	12.4707	20	561
16	154.097	454.149	12.4119	20	605
17	153.755	454.712	12.6608	20	648
18	153.142	454.321	12.3853	20	695
19	152.829	454.663	12.0777	20	745
20	153.269	454.886	12.3248	20	790
21	153.552	454.549	12.4554	20	839
22	153.922	454.534	12.3774	20	886
23	154.283	455.41	12.2358	20	935
24	153.614	455.612	11.9795	20	981
25	153.627	455.716	11.9046	20	1033
26	153.197	455.059	11.6736	20	1079
27	153.916	455.422	12.0603	20	1130
28	154.191	455.332	12.1389	20	1179
29	154.16	454.739	11.8511	20	1228
30	153.846	454.719	12.0223	20	1277
31	153.026	454.462	11.8505	20	1326
32	152.671	454.986	11.5418	20	1373
33	152.974	454.519	11.487	20	1419
34	153.52	454.497	12.0322	20	1468
35	153.886	453.666	12.0737	20	1519
36	152.722	453.363	12.1747	20	1567
37	152.804	453.698	12.0874	20	1616
38	152.593	453.915	12.0298	20	1662
39	151.626	453.645	11.8792	20	1710
40	152.22	453.893	11.4849	20	1761
41	153.185	454.223	12.0815	20	1810
42	153.518	453.097	12.401	20	1863
43	152.328	452.369	12.2805	20	1914
44	152.723	453.136	12.3004	20	1966
45	152.085	453.71	12.1371	20	2015
46	152.143	453.769	12.0461	20	2063
47	152.332	453.546	12.2819	20	2114
48	152.663	452.79	12.44	20	2163
49	152.474	451.883	12.4377	20	2211
50	152.165	451.891	12.4999	20	2259
51	151.063	452.697	11.814	20	2309
52	151.388	452.701	12.4945	20	2361
53	153.212	452.394	12.6962	20	2410
54	152.553	452.345	12.6879	20	2458
55	153.536	453.58	12.7861	20	2504
56	152.614	452.312	13.0767	20	2549
57	152.708	452.821	13.2183	20	2594
58	151.926	453.957	12.292	20	2637
59	151.396	453.724	12.7535	20	2678
60	152.76	453.79	12.6814	20	2719
61	153.643	455.539	12.6624	20	2759
62	154.091	455.275	12.9768	20	2799
63	154.039	454.681	13.2245	20	2841
64	153.751	454.396	13.4132	20	2880
65	153.291	455.297	12.8566	20	2918
66	152.707	455.239	12.7915	20	2959
67	153.224	455.232	12.7318	20	3000
68	153.941	455.245	12.8587	20	3038
69	154.173	454.991	12.8644	20	3075
70	153.801	454.581	13.0317	20	3116
71	153.302	454.7	12.6605	20	3152
72	153.085	455.313	12.4571	20	3189
73	152.641	455.413	12.2948	20	3226
74	153.186	454.489	12.5191	20	3262
75	153.75	453.959	12.6774	20	3298
76	153.545	453.654	12.7864	20	3336
77	153.368	453.322	13.0506	20	3374
78	153.066	453.692	12.9416	20	3413
79	152.027	453.684	12.5443	20	3452
80	152.633	454.265	12.6703	20	3491
81	152.672	453.478	12.6697	20	3530
82	153.454	453.553	12.8112	20	3569
83	153.285	453.15	12.7597	20	3610
84	153.032	453.453	13.0866	20	3651
85	153.118	454.416	12.8079	20	3687
86	152.541	454.674	12.8589	20	3724
87	153.742	454.062	13.3106	20	3765
88	152.968	453.782	12.8221	20	3803
89	153.832	453.384	13.0083	20	3840
90	153.495	452.932	12.93	20	3882
91	152.864	453.233	13.0161	20	3925
92	152.963	453.477	12.6138	20	3969
93	151.623	452.517	12.9395	20	4012
94	152.967	453.366	12.8233	20	4054
95	153.522	452.74	13.1405	20	4095
96	154.418	452.917	13.4366	20	4136
97	154.27	452.633	13.2672	20	4179
98	153.811	452.986	13.3572	20	4223
99	153.807	454.695	12.9334	20	4266
100	153.891	454.749	12.9359	20	4306
101	155.172	454.929	13.2285	20	4346
102	155.088	453.811	13.4113	20	4387
103	154.449	454.119	13.7204	20	4427
104	154.377	453.435	13.654	20	4466
105	153.754	454.079	13.337	20	4507
106	153.347	454.592	12.9862	20	4546
107	153.918	455.5	12.9339	20	4584
108	153.652	454.674	13.0674	20	4622
109	153.845	453.907	13.5222	20	4660
110	154.467	453.417	14.0811	20	4699
111	152.289	453.464	14.1453	20	4740
112	152.154	453.738	13.4052	20	4780
113	154.381	455.764	13.078	20	4818
114	154.738	455.868	12.9164	20	4857
115	154.301	453.519	12.9124	20	4895
116	153.585	452.714	13.3641	20	4934
117	153.371	452.338	13.6926	20	4968
118	153.628	453.073	13.4898	20	5009
119	152.021	452.782	13.3664	20	5050
120	152.369	453.228	13.4105	20	5088
121	153.574	452.621	14.3153	20	5138
122	155.048	454.639	13.0872	20	5160
123	153.615	452.253	13.5274	20	5198
124	153.533	452	13.5165	20	5235
125	151.971	452.141	13.6862	20	5274
126	150.902	451.341	14.3822	20	5325
127	151.22	452.407	13.3358	20	5350
128	152.041	451.975	14.3716	20	5398
129	153.721	451.842	13.4945	20	5423
130	153.138	451.873	13.8923	20	5463
131	153.802	452.204	13.5408	20	5503
132	152.927	452.379	13.4643	20	5543
133	152.478	452.964	13.4157	20	5584
134	152.673	453.194	13.4205	20	5624
135	154.001	452.851	13.3868	20	5663
136	154.715	452.535	13.7962	20	5702
137	153.949	452.68	14.1942	20	5741
138	154.031	454.355	13.2462	20	5784
139	153.668	454.379	13.1231	20	5825
140	150.308	462.208	10.1591	20	5868
141	154.043	460.682	9.80177	20	5910
1	300.142	402.262	5.5	21	20
2	299.863	402.105	5.5	21	54
3	299.883	402.021	5.5	21	90
4	299.709	402.262	5.5	21	126
5	299.859	402.06	5.5	21	163
6	300.183	402.047	5.5	21	200
7	300.131	401.835	5.5	21	237
8	300.057	401.833	5.5	21	277
9	299.998	401.738	5.5	21	317
10	300.077	401.758	5.5	21	357
11	299.955	402.529	5.5	21	398
12	300.458	402.533	5.5	21	439
13	300.037	402.507	6.78443	21	482
14	299.789	402.581	7.3686	21	522
15	300.17	402.483	7.17052	21	565
16	300.009	402.539	6.84711	21	609
17	300.807	402.336	5.5	21	650
18	301.181	403.161	5.5	21	697
19	301.503	403.317	5.5	21	747
20	300.605	403.454	7.35392	21	794
21	300.964	403.397	7.36881	21	843
22	300.733	403.85	7.169	21	890
23	301.229	403.858	5.5	21	937
24	301.634	404.423	5.5	21	984
25	301.567	404.485	5.5	21	1036
26	301.723	403.979	5.5	21	1083
27	301.876	403.819	5.5	21	1133
28	301.375	403.773	5.5	21	1182
29	301.038	403.875	5.5	21	1231
30	300.926	403.755	5.5	21	1280
31	301.008	403.752	5.5	21	1329
32	300.931	403.699	5.5	21	1377
33	301.229	403.522	5.5	21	1422
34	300.971	403.194	5.5	21	1471
35	300.689	403.189	5.5	21	1521
36	300.527	403.371	5.5	21	1569
37	300.322	403.1	5.5	21	1618
38	300.337	403.624	5.5	21	1664
39	300.825	403.403	5.5	21	1712
40	299.709	403.227	7.28937	21	1766
41	299.83	403.502	7.54031	21	1817
42	300.058	403.055	7.32574	21	1870
43	300.639	402.512	5.5	21	1917
44	300.94	402.532	5.5	21	1969
45	300.018	402.823	6.77866	21	2020
46	299.97	402.723	7.32811	21	2068
47	300.18	402.86	7.78108	21	2118
48	299.993	402.001	7.84902	21	2168
49	299.895	402.264	7.71477	21	2215
50	299.826	402.174	7.48812	21	2264
51	299.443	402.028	7.6747	21	2314
52	299.599	402.266	7.79694	21	2367
53	299.95	402.021	8.3931	21	2417
54	300.157	402.175	8.24432	21	2463
55	300.098	402.199	8.48644	21	2509
56	300.139	402.735	8.38706	21	2553
57	300.223	402.668	8.39981	21	2597
58	300.21	403.221	8.22422	21	2640
59	300.014	403.771	8.51675	21	2681
60	300.315	403.601	8.87465	21	2722
61	300.548	404.064	8.92761	21	2762
62	300.694	403.988	8.67815	21	2802
63	300.82	404.17	8.67327	21	2844
64	300.778	404.471	8.58028	21	2884
65	300.921	404.197	8.20723	21	2922
66	300.896	404.203	8.31132	21	2963
67	301.086	404.35	8.39131	21	3005
68	301.302	404.138	8.57391	21	3043
69	300.934	404.218	8.49468	21	3080
70	300.66	404.279	8.58649	21	3120
71	300.8	404.233	7.67992	21	3155
72	300.303	404.261	8.29743	21	3192
73	300.496	404.04	8.05233	21	3229
74	300.58	403.555	8.26737	21	3264
75	300.291	403.248	8.46148	21	3300
76	300.381	403.22	8.41006	21	3338
77	300.42	403.009	8.09363	21	3376
78	300.046	402.951	8.15675	21	3415
79	300.117	402.9	8.35386	21	3455
80	300.052	402.863	8.7598	21	3493
81	300.103	402.837	8.20669	21	3532
82	300.314	402.484	8.17817	21	3572
83	300.32	402.808	7.94909	21	3614
84	300.171	403.034	8.23204	21	3654
85	300.261	403.15	8.3285	21	3692
86	299.913	403.21	8.05423	21	3729
87	300.232	402.389	8.45898	21	3769
88	300.357	402.409	8.16789	21	3807
89	300.25	402.352	8.23359	21	3844
90	300.304	402.415	8.37932	21	3886
91	300.361	402.313	8.36483	21	3929
92	300.668	402.075	8.44433	21	3973
93	300.772	402.31	8.40245	21	4016
94	300.789	402.484	8.75233	21	4059
95	301.45	402.165	8.92534	21	4100
96	301.052	402.217	9.2711	21	4141
97	301.918	402.345	8.6013	21	4183
98	301.871	402.763	8.51327	21	4226
99	301.938	403.364	8.27726	21	4269
100	301.813	403.426	8.5745	21	4309
101	302.284	403.669	8.73308	21	4350
102	302.333	403.512	8.89178	21	4390
103	301.724	403.773	9.30592	21	4432
104	302.536	403.706	9.18289	21	4470
105	302.575	403.915	8.77513	21	4510
106	302.387	404.199	8.9789	21	4549
107	302.391	404.558	9.004	21	4587
108	302.675	404.556	8.4884	21	4625
109	302.283	403.807	8.98025	21	4664
110	302.404	403.851	8.46846	21	4704
111	302.217	403.588	8.18229	21	4745
112	301.474	403.016	8.5331	21	4784
113	301.998	403.328	8.62407	21	4823
114	302.278	403.23	8.42918	21	4861
115	302.418	403.036	8.43043	21	4898
116	301.693	403.102	8.25813	21	4937
117	301.765	402.698	8.3633	21	4971
118	301.393	402.798	9.02026	21	5012
119	301.165	402.713	8.77924	21	5053
120	301.777	402.457	8.13677	21	5091
121	301.32	402.448	8.99587	21	5127
122	301.851	402.285	8.64023	21	5164
123	301.306	402.479	8.98062	21	5202
124	301.293	402.367	9.21222	21	5238
125	301.217	402.688	8.96556	21	5277
126	301.576	402.684	8.69084	21	5313
127	301.58	402.456	9.10716	21	5353
128	301.512	402.216	8.98573	21	5387
129	301.655	401.866	9.11986	21	5426
130	301.531	401.951	8.89616	21	5466
131	301.291	401.998	8.77737	21	5506
132	301.442	401.776	8.92362	21	5547
133	301.389	402.128	9.09348	21	5588
134	301.633	402.412	9.14162	21	5628
135	301.262	402.517	9.48435	21	5668
136	301.381	402.545	9.59958	21	5707
137	301.39	402.688	9.82831	21	5746
138	301.362	402.666	9.46996	21	5789
139	301.862	402.541	8.83349	21	5829
140	301.124	402.603	9.65767	21	5875
141	302.098	403.384	9.29684	21	5917
142	302.514	403.507	9.55029	21	5958
143	302.582	403.551	9.64129	21	5998
144	302.393	403.64	9.80164	21	6036
145	302.43	403.671	9.58876	21	6075
146	303.31	403.868	9.08138	21	6112
147	302.286	403.725	9.48229	21	6153
148	303.227	403.224	9.13202	21	6189
149	302.047	403.107	9.65748	21	6230
150	302.3	402.868	9.72116	21	6266
151	301.572	402.981	9.80993	21	6308
152	302.338	402.761	9.1018	21	6346
153	301.649	403.123	9.54571	21	6387
154	301.426	403.351	9.66075	21	6424
155	301.67	403.151	9.74473	21	6461
156	302.21	402.935	9.24304	21	6495
157	301.515	402.82	9.86608	21	6530
158	301.568	402.535	9.79042	21	6565
159	301.623	402.397	9.62262	21	6602
160	301.429	401.966	9.798	21	6636
161	302.557	402.174	9.15771	21	6667
162	302.17	402.192	9.48856	21	6701
163	301.746	402.279	9.64919	21	6734
164	301.73	401.932	9.50536	21	6766
165	301.519	402.105	9.86097	21	6798
166	301.401	402.644	9.69868	21	6832
167	301.337	402.416	9.89855	21	6863
168	301.216	402.347	9.86833	21	6894
169	301.354	401.83	10.1577	21	6925
170	301.754	401.73	9.83921	21	6956
171	301.688	401.703	9.89498	21	6986
172	301.523	401.686	9.9102	21	7020
173	301.659	402.17	9.93594	21	7051
174	301.696	402.463	9.91679	21	7082
175	301.767	402.432	9.95052	21	7113
176	302.16	402.595	10.2192	21	7143
177	302.256	402.685	9.9936	21	7175
178	302.649	402.973	10.1707	21	7207
179	302.532	402.916	10.1502	21	7237
180	302.358	403.135	10.1586	21	7266
181	302.774	403.531	10.0616	21	7295
182	303.068	403.424	10.2869	21	7324
183	303.058	403.413	10.4475	21	7352
184	303.274	403.313	10.2493	21	7381
185	303.131	403.343	10.087	21	7412
186	303.077	403.411	10.1732	21	7442
187	302.81	403.317	10.0832	21	7473
188	302.765	403.524	10.1825	21	7501
189	302.988	403.135	9.99857	21	7528
190	302.995	402.929	10.056	21	7557
191	302.616	402.896	10.5021	21	7583
192	303.113	403.088	10.2578	21	7610
193	302.671	403.135	10.3458	21	7637
194	301.781	403.044	10.4184	21	7664
195	301.791	402.596	10.3087	21	7692
196	302.103	402.13	10.6017	21	7718
197	302.078	401.952	10.0464	21	7747
198	302.557	401.919	10.1809	21	7772
199	302.317	402.27	10.3235	21	7798
200	302.332	402.068	10.4129	21	7825
201	302.947	402.158	10.0544	21	7851
202	302.734	401.6	10.1524	21	7878
203	302.735	401.47	10.1196	21	7904
204	303.057	401.71	10.0532	21	7931
205	302.85	401.944	10.1676	21	7960
206	302.419	401.793	10.2514	21	7986
207	302.407	401.769	10.3393	21	8012
208	302.501	401.413	10.5509	21	8037
209	302.867	401.594	10.2907	21	8063
210	303.084	401.23	10.4097	21	8088
211	302.71	401.608	10.1382	21	8113
212	302.744	401.655	10.2368	21	8140
213	302.631	401.664	10.4261	21	8168
214	303.391	401.94	10.4883	21	8196
215	303.172	402.05	10.5003	21	8225
216	304.102	402.252	10.268	21	8253
217	303.558	402.33	10.6237	21	8284
218	303.776	402.27	10.5134	21	8313
219	303.749	402.514	10.5649	21	8347
220	303.858	402.747	10.6366	21	8381
221	303.795	403.149	10.6878	21	8413
222	304.001	403.178	10.8885	21	8445
223	303.984	403.479	10.9641	21	8478
224	304.257	403.633	10.5675	21	8509
225	304.089	403.212	10.6059	21	8539
226	304.11	403.126	10.3342	21	8568
227	303.887	403.071	10.2753	21	8598
228	304.028	403.536	10.3659	21	8627
229	303.447	403.481	10.7877	21	8655
230	302.577	403.128	11.0721	21	8684
231	303.196	402.807	10.9845	21	8711
232	303.347	402.935	10.7409	21	8739
233	303.337	403.01	10.7555	21	8764
234	302.925	402.618	10.6759	21	8790
235	302.982	402.454	10.7648	21	8815
236	303.447	402.486	10.8288	21	8842
237	303.104	402.181	10.808	21	8867
238	303.092	402.04	10.8645	21	8890
239	302.563	401.964	11.0641	21	8913
240	302.804	401.849	10.8977	21	8935
241	301.562	411.407	15.5858	21	8966
1	338.251	444.059	5.5	22	21
2	338.031	445.77	5.5	22	55
3	337.801	446.363	5.5	22	91
4	337.543	446.044	5.5	22	127
5	337.417	445.854	5.5	22	164
6	337.646	445.612	5.5	22	201
7	337.532	446.377	5.5	22	238
8	337.786	444.826	5.5	22	278
9	338.138	443.068	5.5	22	319
10	337.694	446.123	5.5	22	359
11	337.692	445.538	5.5	22	399
12	337.602	444.938	5.5	22	440
13	337.233	445.725	5.5	22	479
14	337.957	446.998	5.5	22	520
15	338.511	446.885	5.5	22	563
16	338.438	445.996	5.5	22	607
17	345.441	435.885	13.2088	22	656
18	349.024	435.048	14.1815	22	703
19	351.674	433.564	14.4677	22	764
20	350.996	434.478	14.6949	22	811
21	350.948	434.374	14.3984	22	859
22	351.427	434.476	14.1249	22	896
23	351.754	434.397	13.6663	22	943
24	351.465	434.651	14.0221	22	990
25	349.874	435.839	14.2983	22	1052
26	352.75	433.654	13.9342	22	1089
27	350.7	434.72	14.5835	22	1150
28	350.704	434.489	14.2848	22	1200
29	350.949	434.364	13.7447	22	1237
30	349.536	434.803	13.8663	22	1286
31	349.303	434.688	14.1428	22	1337
32	349.629	434.95	14.2073	22	1383
33	349.88	434.797	14.5289	22	1444
34	350.625	434.35	14.5386	22	1492
35	350.828	434.366	14.3272	22	1539
36	350.5	433.728	13.5995	22	1577
37	350.147	433.578	13.8936	22	1626
38	350.026	433.725	13.9396	22	1674
39	350.242	433.195	14.1451	22	1723
40	349.466	433.996	14.634	22	1782
41	350.623	434.178	14.654	22	1833
42	350.08	433.757	14.2947	22	1884
43	350.206	433.273	14.2596	22	1934
44	349.962	433.934	14.6746	22	1985
45	349.987	433.481	14.4176	22	2035
46	349.667	433.565	14.7536	22	2086
47	349.504	433.773	14.7579	22	2136
48	350.031	433.127	14.4211	22	2185
49	349.12	433.152	14.1839	22	2223
50	349.233	433.19	14.543	22	2283
51	349.998	432.543	14.9447	22	2332
52	349.022	433.186	14.8976	22	2382
53	348.209	434.02	14.6513	22	2432
54	349.052	433.56	14.8441	22	2480
55	350.472	433.057	14.7211	22	2524
56	350.573	433.064	14.356	22	2571
57	350.051	433.687	14.6611	22	2615
58	349.989	434.219	15.2426	22	2656
59	350.083	434.533	15.2141	22	2698
60	351.829	435.293	15.2913	22	2737
61	351.33	434.725	15.072	22	2779
62	350.382	435.366	15.1472	22	2820
63	349.959	435.688	14.8679	22	2859
64	346.52	436.945	14.0146	22	2887
65	344.154	438.617	13.1624	22	2926
66	344.545	438.466	13.1523	22	2967
67	344.225	438.785	13.0412	22	3007
68	344.238	438.233	13.2292	22	3046
69	343.534	438.408	12.9184	22	3084
70	342.335	440.627	12.6093	22	3124
71	342.375	440.59	12.4888	22	3159
72	342.562	440.656	12.6621	22	3195
73	342.76	440.315	12.8606	22	3232
74	343.124	439.141	12.9205	22	3268
75	350.888	434.202	14.8677	22	3314
76	342.745	438.555	12.7967	22	3342
77	343.634	437.37	12.8973	22	3379
78	343.249	437.98	13.0989	22	3419
79	358.29	437.919	5.5	22	3454
80	361.585	424.547	9.01332	22	3494
81	358.629	430.232	7.44348	22	3533
82	358.79	432.221	6.99743	22	3573
83	358.744	437.002	5.5	22	3613
85	358.397	437.334	5.5	22	3690
86	358.449	434.794	5.5	22	3726
1	259.745	317.206	8.75298	23	22
2	259.949	317.736	8.98517	23	57
3	259.597	317.684	9.739	23	93
4	259.336	317.305	10.4439	23	129
5	259.147	317.124	10.5528	23	166
6	259.435	317.033	10.7274	23	203
7	259.521	317.138	10.8311	23	240
8	260.145	317.881	9.98294	23	282
9	259.769	318.121	9.03341	23	321
10	259.296	317.534	8.63625	23	360
11	258.611	317.374	9.3668	23	402
12	259.23	317.324	9.53146	23	443
13	259.994	317.918	8.88128	23	481
14	260.375	318.469	9.16068	23	521
15	260.526	317.618	9.3618	23	567
16	260.413	317.167	9.01737	23	608
17	259.988	317.486	10.483	23	653
18	260.092	316.193	12.1144	23	701
19	260.794	315.319	13.2523	23	752
20	261.146	315.065	13.67	23	797
21	260.684	316.126	13.3481	23	847
22	261.23	316.059	13.6731	23	894
1	399.321	315.19	9.99304	24	23
2	398.2	315.453	8.86932	24	56
3	397.684	314.595	10.1143	24	92
4	398.294	313.383	9.96237	24	128
5	398.215	314.288	10.0446	24	165
6	397.745	314.105	9.61667	24	202
7	397.261	314.864	8.86269	24	239
8	397.582	315.678	8.54662	24	280
[truncated: 6,968 more rows]
