# Supplementary material for: Functional visualization of NK cell-mediated killing of metastatic single tumor cells
Source: eLife journal article supplement (doi:10.7554/elife.76269), 2022-02-03
Supplement: supp [file nk_pos_7.xlsx]

## Sheet: Sheet1
1	76.0238	90.2216	5	1	0
2	76.0263	87.6025	5	1	33
3	75.8487	88.6241	5	1	69
4	76.6074	90.6155	5	1	108
5	76.5884	91.3027	5	1	150
6	76.4125	89.4684	5	1	194
7	76.0806	88.157	5	1	241
8	75.0952	88.2471	5	1	293
9	75.9837	87.8607	5	1	345
10	76.8329	89.2779	5	1	398
11	77.4838	90.4582	5	1	452
12	77.2382	90.497	5	1	501
13	76.1066	88.3393	5	1	552
14	74.9279	87.659	5	1	601
15	74.5623	87.2214	5	1	651
16	75.1015	87.3165	5	1	701
17	75.2848	88.8068	5	1	748
18	75.7088	90.52	5	1	794
19	76.8792	89.2765	5	1	834
20	75.8575	87.8194	5	1	870
21	75.0894	86.9948	5	1	907
22	74.6912	86.9786	5	1	944
23	75.1131	87.6694	5	1	982
24	75.6861	88.6274	5	1	1021
25	81.478	89.3044	5	1	1059
26	91.6086	101.222	6.28853	1	1098
27	90.5428	102.667	6.70763	1	1136
28	92.2165	106.342	7.14395	1	1175
29	92.3972	105.875	7.01945	1	1213
30	91.2835	101.465	7.06688	1	1251
31	109.565	84.7366	16.6779	1	1310
1	128.333	227.145	5	2	1
2	129.274	228.636	5	2	34
3	128.917	227.852	5	2	70
4	129.034	227.085	5	2	109
5	128.97	226.557	5	2	151
6	129.745	228.459	5	2	195
7	128.129	234.484	5	2	243
8	133.224	237.176	5	2	295
9	129.623	235.108	5	2	347
10	127.327	233.462	5	2	399
11	137.475	236.565	6.38346	2	455
12	133.477	234.105	5	2	503
13	137.17	236.13	6.53088	2	554
14	137.582	236.595	7.32514	2	604
15	137.252	236.554	6.65667	2	655
16	137.224	237.104	7.41839	2	705
17	136.689	236.218	6.94193	2	752
18	136.121	235.72	6.79018	2	798
19	136.725	235.362	7.49183	2	837
20	138.119	234.978	8.01417	2	872
21	136.592	236.307	7.66954	2	909
22	139.357	236.472	8.17635	2	947
23	139.983	228.274	5	2	983
24	140.012	227.639	5	2	1022
25	133.175	221.636	7.58669	2	1060
26	133.055	221.389	7.70506	2	1099
27	132.399	219.328	7.09192	2	1137
28	132.007	216.849	7.19632	2	1176
29	131.937	216.216	7.64587	2	1214
30	131.793	216.578	7.32013	2	1252
31	131.039	217.009	7.29711	2	1289
32	131.164	215.892	7.21951	2	1324
33	131.761	216.121	7.07097	2	1359
34	132.008	216.084	7.69187	2	1395
35	131.844	217.406	7.10788	2	1427
36	132.223	217.813	6.94775	2	1462
37	132.494	217.68	6.80622	2	1496
38	132.947	216.232	6.90442	2	1528
39	132.638	215.918	6.78506	2	1561
40	132.278	216.521	6.70871	2	1593
41	132.358	217.613	6.9662	2	1626
42	132.586	217.77	7.05205	2	1660
43	132.512	217.967	6.98898	2	1690
44	132.432	217.878	6.95823	2	1721
45	132.442	216.86	6.93434	2	1753
46	132.045	216.182	6.9557	2	1790
47	131.95	216.31	7.65252	2	1828
48	131.985	216.594	7.75918	2	1860
49	132.421	216.461	7.89137	2	1891
50	131.285	218.323	8.08201	2	1925
51	131.583	217.396	7.75996	2	1957
52	131.669	216.847	7.43799	2	1986
53	132.822	215.049	7.74033	2	2016
54	131.765	215.89	8.23695	2	2043
55	131.399	217.217	8.07408	2	2070
56	131.847	217.984	7.56216	2	2094
57	132.055	217.234	8.15098	2	2119
58	132.482	216.382	8.31521	2	2144
59	132.407	216.072	7.9147	2	2171
60	131.66	216.046	8.41959	2	2196
61	131.641	215.345	8.90833	2	2220
62	131.517	215.333	8.84683	2	2244
63	130.999	216.862	8.97359	2	2269
64	130.826	217.573	8.93427	2	2292
65	130.499	217.409	9.15349	2	2314
66	131.004	216.452	8.99241	2	2335
67	131.137	216.213	8.92657	2	2355
68	131.144	216.388	8.77803	2	2374
69	131.235	216.393	9.01116	2	2390
70	131.535	218.153	9.03229	2	2410
71	131.368	217.987	8.91901	2	2430
72	132.649	216.37	8.5786	2	2449
73	132.997	215.305	8.22308	2	2469
74	133.625	215.247	8.42178	2	2491
75	132.792	216.783	8.44863	2	2514
77	140.128	236.184	9.56507	2	2570
78	126.659	226.867	11.2313	2	2598
79	126.675	226.337	11.073	2	2628
80	123.467	226.09	11.5305	2	2660
81	122.514	225.591	11.6746	2	2694
82	118.734	223.451	11.8495	2	2726
83	112.827	214.106	11.0513	2	2757
84	109.221	214.424	10.6863	2	2786
85	111.222	215.184	11.6576	2	2817
86	111.212	215.348	11.2136	2	2845
87	109.323	214.383	10.9443	2	2875
88	108.391	214.155	10.754	2	2903
89	109.069	213.353	10.8797	2	2930
90	108.622	214.115	10.803	2	2960
91	108.472	214.855	10.6916	2	2987
92	109.028	217.514	10.4213	2	3017
93	108.46	216.318	10.9773	2	3044
94	106.845	213.497	10.7904	2	3068
95	105.687	209.821	10.673	2	3093
96	107.897	206.577	10.9444	2	3116
97	106.457	207.528	11.0166	2	3140
98	104.824	210.233	10.9073	2	3166
99	106.131	214.169	10.949	2	3191
100	106.146	213.336	11.1501	2	3215
101	105.497	211.499	11.0774	2	3242
102	104.335	210.202	10.8616	2	3268
103	105.178	211.118	10.4687	2	3294
104	104.965	211.631	10.7741	2	3320
1	134.818	252.528	5	3	2
2	136.023	253.497	5	3	35
3	136.463	252.67	5	3	71
4	138.107	249.377	5	3	110
5	136.911	252.063	5	3	152
6	137.718	252.448	5	3	196
7	137.95	253.266	5	3	244
8	137.714	253.166	5	3	296
9	138.891	251.627	5	3	348
10	141.745	251.998	5	3	400
11	137.524	245.367	9.40829	3	460
12	137.091	245.582	9.43604	3	509
13	136.813	244.775	9.14501	3	559
14	136.725	244.312	8.92369	3	608
15	136.652	244.234	8.82084	3	658
16	135.743	245.458	9.02273	3	709
17	135.317	245.81	9.2325	3	756
18	135.533	245.439	9.39672	3	803
19	135.353	245.411	9.53832	3	843
20	135.636	244.923	9.54494	3	877
21	135.595	244.5	9.45539	3	915
22	135.856	245.125	9.66655	3	951
23	135.342	245.735	9.49469	3	988
24	136.126	245.638	9.8515	3	1026
25	135.332	244.594	9.4063	3	1063
26	135.135	244.693	9.68023	3	1102
27	133.982	244.981	9.55705	3	1140
28	135.204	244.307	9.5466	3	1179
29	134.671	244.569	9.52405	3	1216
30	134.998	244.928	9.73154	3	1254
31	134.826	245.108	9.82646	3	1291
32	135.579	244.899	9.6166	3	1327
33	135.69	244.82	9.54727	3	1362
34	135.832	244.602	9.53766	3	1398
35	135.474	245.275	9.32376	3	1431
36	136.02	245.471	9.32887	3	1465
37	135.36	246.045	9.03845	3	1499
38	134.307	245.646	8.32202	3	1529
39	132.209	246.711	7.617	3	1562
1	211.303	13.4893	8.13498	4	3
2	214.977	17.5594	7.97875	4	36
3	214.462	17.6702	8.11086	4	72
4	210.681	13.2046	8.07725	4	111
5	209.224	8.89713	7.33318	4	153
6	207.116	0	8.25148	4	197
7	201.04	0	5	4	240
9	187.806	0	8.8843	4	350
10	187.58	0	8.51508	4	401
11	186.887	0	8.39838	4	454
12	185.776	2.43036	7.78809	4	504
13	187.196	0	9.31288	4	555
14	187.852	0	9.47494	4	605
15	187.795	0	9.62158	4	656
16	187.59	0	9.5493	4	706
17	187.786	0	9.87414	4	753
18	187.479	0	9.75515	4	799
19	187.131	0	9.82855	4	838
20	187.227	0	10.0185	4	873
21	187.135	0	9.98557	4	910
22	187.756	0	6.95367	4	946
1	21.2275	180.989	10.9308	5	4
2	20.8453	180.002	11.4894	5	38
3	20.3653	180.082	11.5714	5	75
4	21.3727	182.106	11.1304	5	113
5	21.5745	184.955	10.9097	5	155
6	21.7796	184.182	11.4204	5	203
7	20.7032	183.123	11.0164	5	248
8	19.9679	183.827	11.2112	5	299
9	20.2515	181.63	11.4217	5	354
10	20.286	180.596	11.7431	5	407
11	20.9606	180.616	11.8663	5	461
12	21.8017	182.861	11.5663	5	510
13	21.9557	182.001	11.8981	5	560
14	22.077	180.485	12.1956	5	609
15	21.018	179.73	12.1819	5	659
16	20.617	180.207	12.0387	5	710
17	20.3	179.697	12.1576	5	757
18	21.1783	179.16	12.4059	5	804
19	21.2763	179.974	12.4392	5	844
20	21.8391	181.096	12.4887	5	878
21	21.5675	180.844	12.6637	5	916
22	20.8277	179.83	12.4015	5	952
23	20.0783	179.651	12.426	5	989
24	20.6037	178.506	12.6562	5	1027
25	21.8002	179.187	12.8252	5	1065
26	21.8859	179.776	12.6261	5	1104
27	21.1733	180.182	12.8282	5	1142
28	21.3736	178.805	13.0222	5	1181
29	20.0985	178.206	12.6767	5	1219
30	20.4529	178.369	12.9886	5	1257
31	20.6091	178.528	12.9937	5	1293
32	21.0013	179.576	12.7422	5	1328
33	21.3373	179.923	12.6284	5	1363
34	22.1919	181.74	12.56	5	1399
35	21.66	180.038	12.4503	5	1432
36	21.8622	179.762	12.4999	5	1467
37	22.1887	179.447	12.4831	5	1501
38	22.642	180.783	12.5703	5	1533
39	22.4961	181.027	12.5935	5	1564
40	22.1831	184.278	12.3565	5	1595
41	21.7572	182.849	12.4681	5	1629
42	20.5251	184.174	12.0139	5	1663
43	14.7465	184.749	12.1529	5	1694
44	0	167.032	15.9249	5	1741
45	0	166.483	15.2589	5	1774
46	12.5455	187.619	13.3516	5	1795
47	9.40812	193.085	14.2882	5	1846
49	8.36401	189.742	11.389	5	1894
1	8.5967	228.898	9.96249	6	5
2	8.85667	227.144	9.69799	6	37
3	9.13735	228.337	9.81351	6	74
4	9.34298	229.134	9.90783	6	115
5	8.90834	227.368	9.8591	6	157
6	8.66847	226.639	9.85423	6	201
7	8.2339	225.802	10.0302	6	249
8	8.01439	225.672	10.1978	6	300
9	8.56929	226.83	9.90252	6	353
10	8.54662	227.61	10.1027	6	406
11	9.21021	228.169	10.1665	6	459
12	8.45897	225.844	10.1548	6	508
13	9.1599	226.5	10.226	6	558
14	8.16419	225.856	10.471	6	607
15	9.35196	223.67	10.5783	6	657
16	8.65462	227.1	10.1526	6	708
17	8.72313	227.605	10.2271	6	755
18	9.33406	227.955	10.4287	6	801
19	8.89075	226.63	10.2033	6	841
20	8.65237	225.776	10.7338	6	875
21	8.41921	225.55	10.8064	6	913
22	8.18783	225.211	10.7972	6	949
23	8.40017	226.473	10.6418	6	986
24	8.83227	227.619	10.5842	6	1025
25	8.45786	225.632	10.6176	6	1062
26	8.33637	225.769	10.5847	6	1101
27	7.73071	225.377	10.9902	6	1139
28	8.85025	224.653	11.0324	6	1178
29	9.56092	225.746	10.9688	6	1215
30	10.1064	226.984	10.9589	6	1253
31	9.38247	227.671	10.9591	6	1290
32	9.75668	226.505	10.3899	6	1326
33	8.69656	225.761	10.8034	6	1361
34	8.83265	225.352	10.8032	6	1397
35	8.90718	224.985	10.858	6	1430
36	9.24062	225.547	10.6549	6	1464
37	10.4172	227.395	10.5163	6	1498
38	10.8647	227.482	10.6341	6	1531
39	9.93216	226.49	10.4149	6	1563
40	9.08116	225.873	10.4525	6	1594
41	9.36637	225.689	11.0078	6	1628
42	8.99292	225.841	10.9883	6	1662
43	9.34731	225.698	10.898	6	1693
44	9.437	227.638	10.911	6	1723
45	9.72674	227.35	10.8878	6	1755
46	7.91734	225.932	10.7496	6	1794
47	7.05962	224.807	11.2767	6	1831
48	6.90961	222.532	11.1077	6	1861
49	6.87612	223.245	11.442	6	1896
50	7.57981	226.483	11.1737	6	1928
51	7.7524	226.658	11.3139	6	1960
52	7.94498	226.871	11.1282	6	1991
53	7.97985	225.41	11.9699	6	2020
54	6.53683	224.149	11.6201	6	2046
55	6.42811	224.236	11.7723	6	2072
56	7.59776	223.615	11.8212	6	2097
57	7.5644	224.313	11.6731	6	2122
58	8.06052	226.033	11.8088	6	2147
59	8.17521	226.468	11.8647	6	2174
60	7.96772	226.023	11.9983	6	2199
61	6.85777	224.953	12.11	6	2222
62	6.61956	224.714	12.1093	6	2245
63	6.62053	224.801	12.225	6	2270
64	6.56744	225.559	12.1973	6	2293
65	7.00456	226.762	12.2653	6	2316
66	7.84082	227.358	12.3525	6	2337
67	7.90884	226.173	12.213	6	2356
69	7.32528	223.749	12.3692	6	2391
70	13.6718	225.504	14.4222	6	2420
71	7.89645	222.957	12.5278	6	2431
1	115.324	226.159	12.6105	7	6
2	118.131	227.287	12.7598	7	39
3	118.583	225.898	10.7467	7	73
4	118.285	226.515	10.5231	7	114
5	118.392	225.737	10.508	7	156
6	118.731	220.485	14.8855	7	220
7	120.199	218.941	15.224	7	268
8	124.79	219.341	14.8597	7	319
9	119.752	219.379	14.8985	7	372
10	118.931	218.584	15.1584	7	427
11	118.843	218.763	15.317	7	479
12	119.481	219.224	14.4498	7	531
13	112.179	222.172	14.0887	7	580
14	106.465	225.694	12.8905	7	611
15	104.724	226.128	12.6561	7	661
16	104.126	226.321	11.9477	7	711
17	103.198	227.141	11.361	7	758
18	99.8281	229.557	10.2364	7	802
19	98.3859	229.556	10.0747	7	842
20	91.1121	232.441	9.44441	7	876
21	87.9091	236.452	10.0141	7	914
22	88.4241	237.228	9.57107	7	950
23	88.0907	234.479	9.92561	7	987
24	82.4608	229.824	11.918	7	1028
25	80.3554	229.509	12.4754	7	1066
26	77.4066	229.119	14.0237	7	1121
1	297.193	15.7757	5	8	7
2	298.083	16.3035	5	8	40
3	297.442	16.8314	5	8	76
4	298.122	16.3574	5	8	116
5	297.19	17.7087	5	8	159
6	297.997	18.6669	5	8	204
7	296.824	19.442	5	8	251
8	297.611	18.9151	5	8	302
9	296.923	18.394	5	8	355
10	297.57	18.7631	5	8	409
11	298.778	17.7968	5	8	462
12	299.182	18.9296	5	8	512
13	298.671	20.3209	5	8	561
14	300.034	19.5627	6.58997	8	613
15	299.971	19.2868	6.25508	8	665
16	299.125	18.5611	5	8	712
17	299.111	18.6575	5	8	759
18	300.059	18.159	6.92181	8	805
19	299.985	17.9689	7.12759	8	846
20	300.146	18.9246	7.1815	8	879
21	299.235	19.3367	7.10629	8	918
22	299.542	18.9856	7.28106	8	953
23	299.865	18.4288	7.15044	8	990
24	300.376	17.9994	7.35406	8	1030
25	300.609	18.3418	7.65593	8	1068
26	300.979	18.4123	7.78778	8	1105
27	299.826	19.1309	7.61824	8	1143
28	300.2	19.4802	7.49245	8	1182
29	300.678	18.3402	7.68836	8	1220
30	301.006	17.6374	7.93144	8	1258
31	300.893	17.966	7.73345	8	1295
32	301.795	18.0107	7.90932	8	1330
33	303.08	18.7844	8.03332	8	1365
34	303.974	18.8493	8.19062	8	1401
35	302.894	19.3782	7.91613	8	1433
36	302.671	18.6049	7.62627	8	1468
37	302.061	18.5148	7.4382	8	1502
38	302.564	17.1731	7.49921	8	1534
39	300.984	17.9923	7.46471	8	1565
40	300.924	19.0044	7.46013	8	1596
41	300.648	19.8554	6.99415	8	1630
42	301.173	19.1825	7.5361	8	1664
43	301.338	18.7134	7.22558	8	1695
44	300.855	18.2175	7.30394	8	1726
45	300.754	18.1968	7.68214	8	1757
46	300.045	18.1581	7.64359	8	1797
47	297.993	18.9793	7.29657	8	1833
48	298.286	19.4143	7.42233	8	1863
49	299.234	17.9986	7.56056	8	1897
50	299.057	17.3741	7.74944	8	1931
51	298.958	17.6966	7.58684	8	1961
52	299.265	17.9487	7.86354	8	1992
53	299.007	17.8291	7.99363	8	2021
54	298.656	19.2476	7.84827	8	2047
55	297.76	19.5807	7.99504	8	2073
56	298.537	18.6241	8.03919	8	2098
57	298.975	17.6767	7.9327	8	2123
58	298.109	17.0289	8.19352	8	2148
59	298.73	16.7418	8.28023	8	2176
60	297.967	17.7923	8.45355	8	2200
61	299.027	18.09	8.54912	8	2223
62	298.788	18.9084	8.46716	8	2248
63	298.705	18.4969	8.43264	8	2272
64	298.216	18.0214	8.66444	8	2294
65	298.325	17.5519	8.83283	8	2318
66	298.953	17.096	9.0714	8	2338
67	298.636	17.7761	8.82199	8	2357
68	298.126	19.0529	8.65271	8	2375
69	298.724	18.8887	8.81222	8	2392
70	297.936	18.9619	8.46091	8	2411
71	298.237	18.0944	8.45083	8	2432
72	299.552	17.256	8.44639	8	2450
73	299.122	17.3906	8.68497	8	2470
74	299.181	18.0193	8.5014	8	2495
75	298.578	18.9932	8.49615	8	2519
76	298.707	18.5406	8.30995	8	2545
77	298.938	17.5768	8.46693	8	2573
78	298.57	17.9835	8.34344	8	2600
79	298.644	17.6791	8.49105	8	2630
80	298.974	17.6645	8.67961	8	2662
81	299.337	18.0236	9.02515	8	2695
82	299.405	19.1525	9.05198	8	2729
83	299.434	18.1634	8.70519	8	2760
84	298.381	17.7619	8.4867	8	2789
85	299.108	16.6114	8.63235	8	2820
86	299.752	15.9643	8.70119	8	2848
87	299.566	16.1148	9.17218	8	2878
88	298.894	16.7355	8.56953	8	2907
89	298.513	17.8412	9.12113	8	2934
90	298.857	17.8058	9.07036	8	2965
91	298.89	16.9941	9.21566	8	2991
92	298.6	16.8524	9.23502	8	3020
93	298.604	16.6751	9.4464	8	3048
94	298.947	16.8326	9.63519	8	3072
95	298.207	17.8406	9.628	8	3097
96	298.197	17.8629	9.52814	8	3120
97	298.399	18.1297	9.61991	8	3144
98	298.973	16.7585	9.57608	8	3170
99	298.191	16.8	9.59244	8	3195
100	298.62	16.773	9.64441	8	3219
101	299.096	16.6457	9.85675	8	3246
102	298.888	17.4024	9.79639	8	3272
103	298.146	18.0261	9.61547	8	3298
104	298.244	17.8943	9.62394	8	3325
105	298.935	17.1202	9.56831	8	3352
106	298.912	16.797	9.65639	8	3380
107	298.838	17.0629	9.63062	8	3408
108	298.546	17.7745	9.59423	8	3435
109	299.436	18.1726	9.46465	8	3463
110	300.502	18.3204	9.39928	8	3494
111	300.862	17.9293	9.4681	8	3525
112	300.793	17.7458	9.50707	8	3558
113	300.669	18.1044	9.60069	8	3590
114	300.771	17.1588	9.68138	8	3623
115	300.674	17.9821	9.66682	8	3656
116	301.002	17.8563	9.74331	8	3688
117	300.137	18.3692	9.698	8	3721
118	300.726	17.5035	9.82006	8	3756
119	300.627	17.4612	9.71512	8	3790
120	300.415	17.0648	9.76329	8	3826
121	300.308	17.4121	9.80346	8	3859
122	300.123	17.7603	9.79288	8	3891
123	300.075	17.6222	9.75525	8	3921
124	299.549	18.0464	9.77958	8	3952
125	299.752	16.3286	9.86442	8	3981
126	299.446	16.4873	9.83022	8	4010
127	298.922	15.6448	10.0156	8	4038
128	298.7	15.6397	10.046	8	4065
129	298.519	16.2757	10.0465	8	4092
130	298.274	16.3119	10.0843	8	4116
131	297.819	15.3789	10.1467	8	4142
132	297.25	13.4983	10.1821	8	4169
133	297.342	13.5781	10.2081	8	4197
134	297.386	13.2504	10.2412	8	4223
135	297.918	14.4945	10.317	8	4249
136	297.807	14.8999	10.2773	8	4276
137	297.83	14.7952	10.3389	8	4303
138	298.056	14.6179	10.2292	8	4328
139	297.613	14.6834	10.1808	8	4353
140	297.888	13.4462	10.3399	8	4378
141	297.558	13.8936	10.1971	8	4403
142	297.667	13.5503	10.3265	8	4428
143	297.968	14.4166	10.0883	8	4453
144	298.452	16.0098	10.1569	8	4479
145	299.28	15.4663	10.0382	8	4504
146	298.543	13.8908	9.94697	8	4530
147	298.037	11.9675	10.1878	8	4556
148	298.455	12.3158	10.283	8	4583
149	298.217	12.4761	10.274	8	4611
150	298.406	14.0043	10.2072	8	4637
151	297.779	13.5218	10.2058	8	4666
152	297.704	13.0768	10.2427	8	4691
153	297.577	12.9846	10.3551	8	4719
154	297.162	12.0037	10.5243	8	4749
155	297.417	11.938	10.4673	8	4780
156	297.346	13.1153	10.5083	8	4807
157	297.611	13.3093	10.5712	8	4837
158	297.52	12.9027	10.4786	8	4865
159	297.182	12.4545	10.4955	8	4891
160	296.908	12.2512	10.6795	8	4916
161	296.677	12.0961	10.5881	8	4942
162	296.91	11.8738	10.698	8	4967
163	296.85	12.3239	10.7925	8	4992
164	296.69	12.9323	10.7733	8	5013
166	296.536	11.4707	10.9461	8	5058
167	296.636	11.7538	10.8926	8	5080
168	296.567	11.8423	11.0352	8	5100
170	296.804	12.1965	11.1587	8	5135
172	296.642	11.9259	10.8741	8	5165
174	296.671	12.1626	10.9172	8	5195
175	297.295	11.4858	11.0859	8	5211
177	297.319	12.7078	10.8514	8	5244
1	301.951	31.1441	5	9	8
2	301.824	31.1018	5	9	41
3	303.404	31.158	5	9	77
4	306.348	33.0128	7.44285	9	118
5	304.122	33.309	5	9	160
6	303.658	34.0884	5	9	205
7	304.252	34.9807	5	9	252
8	304.805	33.1688	6.38264	9	306
9	304.353	32.5154	5	9	356
10	305.447	32.8133	6.94742	9	412
11	305.943	32.8127	7.65583	9	464
12	305.942	31.5935	7.68982	9	515
13	305.339	33.348	7.27142	9	565
14	305.81	33.2048	7.84197	9	614
15	305.692	32.9748	8.04352	9	666
16	305.286	32.2844	7.57267	9	715
17	305.917	32.2187	7.54995	9	761
18	305.539	31.8021	7.9926	9	806
19	305.848	32.2286	8.37736	9	847
20	305.503	32.1473	8.31136	9	880
21	304.287	32.4938	8.11781	9	919
22	304.378	32.1999	8.01969	9	954
23	304.237	31.569	7.76976	9	991
24	304.711	31.004	8.09751	9	1031
25	304.753	31.4477	8.14099	9	1069
26	305.284	31.529	8.66118	9	1106
27	305.395	32.7761	8.69493	9	1144
28	305.255	32.6247	8.64235	9	1183
29	306.52	33.7174	8.63962	9	1221
30	306.051	31.5219	8.57283	9	1259
31	305.507	31.0425	8.82686	9	1297
32	305.017	30.6257	9.78427	9	1332
33	305.145	29.4937	10.6017	9	1367
34	305.648	30.3911	10.2412	9	1403
35	305.991	32.7238	8.40008	9	1434
36	306.025	32.6309	8.17464	9	1469
37	306.61	32.2806	8.20137	9	1503
38	307.457	32.5278	8.40471	9	1535
39	306.895	31.5872	8.76662	9	1567
40	306.502	32.1812	8.40396	9	1597
41	305.905	33.2501	8.22358	9	1631
42	306.3	32.9157	8.06727	9	1665
43	307.333	32.4727	8.51045	9	1696
44	307.451	32.6208	8.27495	9	1727
45	307.908	32.6402	8.70241	9	1758
46	306.248	32.1185	8.2832	9	1798
47	304.241	33.8988	7.93157	9	1834
48	306.195	33.0956	8.81644	9	1866
49	306.835	32.9232	8.79971	9	1899
50	306.886	32.349	9.05191	9	1933
51	306.448	32.3296	8.87407	9	1963
52	306.367	32.1498	8.88064	9	1994
53	306.841	31.7856	9.0205	9	2023
54	307.283	33.5614	9.11256	9	2049
55	306.264	33.4498	9.03663	9	2075
56	306.087	33.4173	8.99053	9	2100
57	306.952	32.192	9.03779	9	2125
58	307.03	31.654	9.39507	9	2150
59	306.8	31.4542	9.33268	9	2178
60	306.426	31.9626	9.62597	9	2201
61	306.298	31.745	9.64273	9	2225
62	305.942	32.5167	9.51856	9	2249
63	305.916	32.7684	9.68417	9	2275
64	305.64	32.1011	9.67927	9	2296
65	305.383	31.3993	9.63936	9	2319
66	305.189	31.2752	9.85057	9	2339
67	305.492	31.2147	9.99172	9	2358
68	304.993	32.6552	9.58538	9	2376
69	305.202	33.2448	9.53485	9	2393
70	305.654	33.124	9.56835	9	2413
71	305.548	32.2725	9.30703	9	2434
72	306.533	31.2623	9.46681	9	2451
73	306.052	31.1139	9.60412	9	2471
74	306.315	32.0344	9.32206	9	2496
75	306.028	33.5145	9.38997	9	2520
76	305.909	32.9605	9.41837	9	2546
77	305.973	32.364	9.3189	9	2574
78	305.987	32.1869	9.34198	9	2602
79	306.425	31.5382	9.54422	9	2632
80	306.443	31.1665	9.50482	9	2664
81	306.191	32.1712	9.62838	9	2696
82	306.417	32.5493	9.57006	9	2730
83	306.412	32.891	9.71176	9	2762
84	306.35	31.5828	9.4053	9	2790
85	306.468	31.0704	9.38036	9	2823
86	308.781	30.4888	9.91438	9	2851
87	307.815	31.2845	10.1124	9	2880
88	307.652	30.9199	10.0313	9	2909
89	307.484	31.7503	10.2228	9	2936
90	307.347	32.3808	10.0823	9	2966
91	307.252	31.3597	10.0516	9	2992
92	306.914	31.012	10.0394	9	3021
93	306.531	31.0187	10.2033	9	3049
94	306.749	31.0354	10.3777	9	3073
95	306.721	32.0852	10.275	9	3098
96	306.425	32.3521	10.3739	9	3121
97	306.464	32.0925	10.4453	9	3145
98	306.555	31.3465	10.263	9	3171
99	306.233	30.9684	10.3032	9	3196
100	306.052	30.8283	10.4034	9	3220
101	306.165	30.4417	10.6116	9	3247
102	305.976	31.7409	10.4149	9	3273
103	306.164	32.3636	10.2418	9	3299
104	306.458	31.8508	10.261	9	3326
105	306.302	31.5163	10.1593	9	3353
106	308.795	32.6447	10.0738	9	3381
107	308.139	33.026	10.1967	9	3409
108	309.274	33.7176	10.0497	9	3436
109	309.47	33.9646	9.97715	9	3464
110	310.116	34.2504	9.88781	9	3495
111	310.366	33.2451	9.68481	9	3526
112	310.074	33.4296	9.78756	9	3559
113	310.117	33.4808	9.92588	9	3591
114	310.217	32.9813	10.0108	9	3624
115	310.131	33.7794	10.1759	9	3657
116	310.66	33.2974	10.0222	9	3689
117	310.232	33.7466	9.94836	9	3722
118	309.934	33.1484	9.98255	9	3757
119	309.568	32.967	10.1158	9	3791
120	309.501	32.9564	10.0819	9	3827
121	309.39	32.9967	10.3156	9	3860
122	309.74	33.7197	10.126	9	3892
123	307.729	32.5395	10.2437	9	3922
124	307.695	32.5654	10.2578	9	3953
125	307.058	31.8389	10.422	9	3982
126	307.272	31.8043	10.2702	9	4011
127	307.143	31.222	10.4992	9	4039
128	307.103	31.2281	10.8258	9	4066
129	307.309	32.056	10.8265	9	4093
130	307.23	33.0552	10.7023	9	4117
131	306.906	32.1088	10.7974	9	4143
132	306.717	31.6511	10.7238	9	4170
133	306.776	31.2521	10.8468	9	4198
134	306.921	31.7788	11.1816	9	4224
135	308.256	32.8733	10.8627	9	4250
136	307.938	33.4097	10.7909	9	4277
137	308.552	33.3753	11.156	9	4304
138	308.527	32.8787	10.6155	9	4329
139	308.919	32.8826	10.45	9	4354
140	309.074	33.0419	10.8911	9	4379
141	307.488	32.2724	11.2253	9	4404
142	307.927	32.3195	10.857	9	4429
143	307.602	33.1335	10.7973	9	4454
144	307.501	33.1741	10.7305	9	4480
145	307.685	32.6886	10.4743	9	4505
146	307.761	32.063	10.5155	9	4531
147	308.554	31.9327	10.7113	9	4557
148	308.499	32.2328	11.1003	9	4584
149	308.317	32.4719	10.8925	9	4612
150	307.454	33.0839	10.8129	9	4638
151	307.48	32.2726	10.7037	9	4667
152	309.108	33.0278	10.5469	9	4692
153	309.592	33.0908	10.6534	9	4720
154	309.255	32.9416	11.1501	9	4750
155	308.898	33.1295	11.0517	9	4781
156	308.472	33.3698	11.169	9	4808
157	309.806	33.5732	10.8561	9	4838
158	308.164	33.3161	10.9404	9	4866
159	308.796	32.9911	10.7102	9	4892
160	309.338	32.7789	11.0296	9	4917
161	306.864	32.009	11.3831	9	4943
162	306.701	31.7893	11.4722	9	4968
163	306.887	32.8233	11.3882	9	4993
164	306.78	32.8286	11.6576	9	5014
165	306.421	32.1145	11.3132	9	5038
166	306.658	31.7932	11.5611	9	5059
167	306.569	31.53	11.6404	9	5081
168	306.633	31.8235	11.6467	9	5101
169	306.6	32.1408	11.9567	9	5120
170	307.13	32.7663	11.6774	9	5136
171	308.278	33.5642	11.7214	9	5150
172	308.52	33.7564	11.5338	9	5166
173	308.926	33.2306	11.3696	9	5181
174	309.045	32.9203	11.5378	9	5196
175	308.642	33.2997	11.6526	9	5212
176	308.884	33.5588	11.528	9	5228
177	307.189	34.7301	11.2184	9	5245
178	306.73	33.5034	11.5183	9	5264
179	308.636	33.1826	11.3173	9	5285
181	307.906	32.2161	11.6411	9	5321
182	308.01	32.2923	11.8919	9	5338
183	307.701	32.8026	11.7826	9	5359
1	358.177	151.702	5	10	9
2	357.731	150.445	5	10	42
3	357.359	149.156	6.45476	10	80
4	357.131	148.019	5	10	117
5	357.288	148.934	5	10	161
6	353.5	142.421	5	10	206
7	354.692	142.726	5	10	253
8	355.002	144.007	5	10	303
9	355.593	144.965	5	10	357
10	355.07	145.05	5	10	410
11	354.192	142.792	5	10	463
12	354.545	142.782	5	10	513
13	353.866	142.227	5	10	562
14	355.155	142.238	6.39579	10	615
15	353.756	142.195	5	10	662
16	352.093	141.488	6.93265	10	717
17	352.877	142.881	6.8117	10	762
18	353.375	142.567	6.75784	10	807
19	351.949	141.758	7.31891	10	848
20	349.539	141.32	8.2402	10	881
21	349.721	141.176	8.23611	10	920
22	350.092	141.469	8.35735	10	955
23	348.127	141.508	9.33104	10	994
24	350.61	141.011	8.32336	10	1032
25	348.75	141.118	8.29329	10	1070
26	346.951	142.54	9.05823	10	1109
27	345.539	142.752	10.5369	10	1147
28	345.736	142.042	10.2612	10	1186
29	345.989	141.049	9.77972	10	1224
30	346.607	140.772	10.2249	10	1262
31	347.093	141.173	9.81775	10	1298
32	347.909	140.569	9.35155	10	1333
33	346.487	141.713	10.3813	10	1368
34	344.595	141.643	11.4602	10	1405
35	342.773	141.929	11.4644	10	1436
36	342.617	141.949	11.6117	10	1471
37	342.523	141.317	11.3557	10	1506
38	342.685	141.114	11.0801	10	1537
39	342.45	141.047	11.1706	10	1568
40	341.775	141.554	10.873	10	1599
41	341.22	140.786	10.7072	10	1633
42	340.521	140.4	10.704	10	1667
43	342.097	140.004	11.0022	10	1698
44	342.729	139.726	10.4052	10	1729
45	342.839	140.187	10.6913	10	1760
46	342.466	141.109	10.9276	10	1800
47	342.37	141.463	11.2636	10	1836
48	340.489	141.992	10.9574	10	1867
49	339.838	141.782	11.2252	10	1901
50	338.645	142.143	10.7367	10	1935
51	338.537	142.378	10.6751	10	1965
52	338.502	142.494	10.9196	10	1996
53	338.848	141.879	11.2975	10	2025
54	313.566	121.462	10.5997	10	2050
55	313.435	123.375	11.0617	10	2076
56	308.247	124.455	14.6943	10	2111
57	308.195	124.51	15.012	10	2137
58	308.082	121.669	15.6012	10	2162
59	317.928	111.906	16.2362	10	2188
60	317.275	108.638	15.0002	10	2212
61	319.621	102.173	11.6303	10	2227
62	320.324	101.393	11.0751	10	2250
63	320.933	100.128	11.045	10	2276
64	334.592	143.696	12.5089	10	2299
1	280.421	222.666	7.12959	11	10
2	280.996	223.7	5	11	43
3	280.658	223.056	5	11	78
4	280.679	222.731	6.79949	11	120
5	280.176	221.853	5	11	162
6	281.18	222.293	5	11	207
7	280.959	223.138	5	11	255
8	280.675	224.552	5	11	305
9	280.752	223.006	5	11	359
10	280.503	222.89	6.41629	11	414
11	280.564	222.041	6.64766	11	466
12	280.158	221.397	5	11	514
13	280.572	222.116	5	11	564
14	280.566	222.836	5	11	612
15	280.384	223.463	5	11	664
16	280.43	222.776	5	11	714
17	280.588	222.399	7.12945	11	763
18	279.973	221.56	6.93807	11	809
19	279.991	220.993	5	11	845
20	280.525	220.753	7.19341	11	883
21	280.258	221.759	7.30507	11	921
22	280.337	222.605	6.84783	11	957
23	280.037	223.045	7.18537	11	993
24	280.237	221.556	7.5537	11	1033
25	280.092	220.732	7.09617	11	1071
26	280.043	220.634	7.21577	11	1108
27	279.862	221.136	7.7702	11	1146
28	280.802	221.258	7.20593	11	1185
29	280.671	221.182	7.40239	11	1223
30	280.749	221.385	7.79704	11	1261
31	280.149	221.293	7.56669	11	1296
32	279.936	220.824	7.48218	11	1331
33	280.868	220.552	7.36654	11	1366
34	281.139	221.02	7.87206	11	1402
35	281.024	222.149	7.14846	11	1435
36	281.541	222.682	7.21275	11	1470
37	281.686	222.502	7.44932	11	1504
38	281.751	221.239	7.47152	11	1536
39	281.604	221.194	6.8	11	1566
40	281.582	221.456	7.11409	11	1598
41	281.559	222.173	7.00783	11	1632
42	281.89	222.677	7.03564	11	1666
43	281.773	222.718	7.24911	11	1697
44	281.662	222.406	7.61813	11	1728
45	280.859	221.494	7.42219	11	1759
46	280.768	221.452	7.27796	11	1799
47	280.954	221.092	8.06365	11	1835
48	281.333	221.911	7.73033	11	1865
49	281.784	221.934	7.45735	11	1898
50	280.805	223.143	7.39679	11	1932
51	280.734	221.852	7.59114	11	1962
52	280.498	221.289	7.70775	11	1993
53	281.3	219.781	8.3445	11	2022
54	280.871	221.154	8.47744	11	2048
55	280.727	222.012	8.30437	11	2074
56	280.692	222.619	7.81361	11	2099
57	281.121	222.118	8.06491	11	2124
58	281.289	220.948	8.5983	11	2149
59	281.038	220.631	8.68633	11	2177
60	281.034	221.047	9.21479	11	2203
61	280.761	220.423	9.0658	11	2226
62	281.139	220.928	9.00197	11	2252
63	280.986	222.609	8.51319	11	2274
64	280.853	222.43	8.79635	11	2298
65	279.921	221.431	8.70711	11	2317
66	280.635	220.943	9.42917	11	2341
67	280.168	220.919	9.22538	11	2360
68	280.195	220.939	9.03985	11	2378
69	281.165	221.239	9.35193	11	2396
70	280.887	223.084	8.59244	11	2412
71	280.941	222.169	8.44127	11	2433
72	282.391	221.666	8.86889	11	2454
73	282.454	220.674	9.36218	11	2474
74	282.595	220.552	9.16322	11	2499
75	282.677	221.19	9.46114	11	2523
76	283.179	221.321	9.01757	11	2548
77	282.578	222.592	8.90202	11	2576
78	282.137	222.081	8.60184	11	2601
79	282.974	221.842	9.42259	11	2634
80	282.167	221.145	9.4905	11	2666
81	282.029	220.866	9.22445	11	2698
82	282.073	220.918	9.22207	11	2732
83	282.995	221.222	8.99773	11	2764
84	282.611	221.595	9.07118	11	2792
85	282.928	222.248	9.2183	11	2825
86	283.3	220.571	9.67769	11	2853
87	282.172	219.877	9.63733	11	2882
88	282.033	219.946	9.4416	11	2910
89	282.835	219.479	9.99447	11	2937
90	282.311	220.734	9.66644	11	2967
91	282.196	221.565	9.64786	11	2993
92	282.131	221.427	9.75816	11	3022
93	281.615	220.436	9.86667	11	3050
94	281.134	220.218	9.77193	11	3074
95	282.049	219.895	9.56092	11	3099
96	281.6	220.078	10.3962	11	3122
97	281.222	220.983	9.82265	11	3146
98	281.408	221.591	9.8257	11	3172
99	281.331	220.895	10.0123	11	3197
100	281.134	220.276	9.99283	11	3221
101	280.468	219.84	9.84975	11	3248
102	281.215	220.207	10.6349	11	3274
103	281.257	220.395	10.3139	11	3300
104	281.515	221.469	9.85655	11	3327
105	281.485	221.912	9.88996	11	3354
106	281.57	221.262	10.0374	11	3382
107	281.2	220.968	9.88833	11	3411
108	281.166	220.632	9.74624	11	3438
109	281.865	221.023	10.012	11	3466
110	282.007	221.682	9.96529	11	3497
111	282.699	222.284	9.69232	11	3528
112	282.515	222.512	9.9257	11	3561
113	281.768	220.991	9.73355	11	3593
114	281.621	220.779	9.72526	11	3626
115	281.871	220.611	9.84253	11	3659
116	282.663	220.318	10.1003	11	3691
117	282.038	221.533	9.88128	11	3724
118	281.908	221.499	9.91798	11	3759
119	282.028	221.706	9.90909	11	3793
120	281.617	220.718	9.93879	11	3829
121	281.195	220.545	9.83419	11	3862
122	281.523	220.67	10.0349	11	3894
123	281.966	221.743	10.0061	11	3924
124	281.444	221.542	10.0073	11	3955
125	282.263	221.709	10.0168	11	3983
126	281.674	221.19	10.1758	11	4012
127	281.675	220.603	10.0571	11	4040
128	281.446	220.395	10.1984	11	4068
129	281.402	220.399	10.7302	11	4094
130	281.584	220.488	10.5647	11	4118
131	281.798	221.455	10.452	11	4144
132	281.431	221.92	10.5854	11	4171
133	281.655	220.675	10.3343	11	4199
134	281.258	220.343	10.4051	11	4225
135	281.293	220.262	10.9336	11	4251
136	281.55	220.506	10.7894	11	4278
137	281.608	220.413	10.9795	11	4305
138	281.654	221.304	10.466	11	4330
139	281.324	221.736	10.2949	11	4355
140	281.216	220.493	11.1953	11	4380
141	281.542	220.753	10.2409	11	4405
142	281.939	221.058	10.879	11	4430
143	282.344	220.642	10.8833	11	4455
144	281.964	221.625	10.6313	11	4481
145	282.309	222.126	10.4497	11	4506
146	282.709	221.628	10.3075	11	4532
147	282.447	220.901	10.1724	11	4558
148	282.539	220.295	10.8219	11	4585
149	282.915	220.754	10.9058	11	4613
150	282.698	220.649	10.81	11	4639
151	282.568	221.555	10.8246	11	4668
152	282.578	222.387	10.4908	11	4693
153	282.363	221.374	10.3683	11	4721
154	282.152	220.913	10.8323	11	4751
155	282.237	220.832	11.204	11	4782
156	281.971	220.737	11.1064	11	4809
157	282.218	221.387	10.9083	11	4839
158	281.591	222.015	10.7827	11	4867
159	281.275	221.738	10.8065	11	4893
160	281.382	221.111	10.3557	11	4918
162	281.507	220.858	11.5368	11	4969
163	281.172	220.809	11.609	11	4994
164	281.428	221.101	11.7938	11	5015
165	281.33	221.866	11.0825	11	5037
1	422.13	91.911	10.7951	12	11
2	422.319	119.036	7.76348	12	44
3	422.143	120.179	7.83578	12	79
4	422.452	120.328	7.65095	12	119
5	422.55	119.459	7.23217	12	163
6	422.695	120.147	7.97416	12	208
7	421.989	121.062	7.90303	12	256
8	422.211	120.732	7.71787	12	307
9	419.084	122.951	8.78514	12	360
10	422.304	120.199	8.16261	12	413
11	423.377	119.472	7.99208	12	465
12	422.04	116.749	7.57619	12	516
13	418.652	108.319	6.80556	12	566
14	423.917	82.3779	10.2304	12	617
15	437.446	87.4092	6.39146	12	667
16	452.094	84.8912	25	12	743
17	451.088	87.9365	25	12	787
1	317.195	106.242	11.044	13	12
2	318.893	105.113	10.3031	13	45
3	319.599	103.166	9.73311	13	81
4	318.961	104.837	10.039	13	121
5	317.185	110.481	12.5442	13	164
6	317.219	112.62	13.3761	13	209
7	314.228	120.852	14.616	13	276
8	315.503	120.097	14.4944	13	323
9	315.532	119.276	14.5914	13	375
10	316.25	118.087	14.7295	13	432
11	316.567	115.423	14.4151	13	484
12	316.648	113.576	14.1972	13	535
13	318.211	106.098	10.7632	13	567
14	320.555	103.582	10.0241	13	618
15	324.127	97.912	9.04507	13	668
16	318.455	90.4647	10.0494	13	716
17	312.463	103.172	17.4201	13	779
1	42.0322	335.978	5	14	13
2	42.3651	331.047	5	14	46
3	44.0345	330.776	5	14	83
4	46.1714	329.571	5	14	123
5	45.6692	332.418	5.93279	14	166
6	47.4028	330.564	5	14	211
7	47.3698	328.049	5	14	259
8	46.9596	327.345	5	14	309
9	46.2823	327.65	5	14	362
10	45.6394	328.813	5	14	418
11	45.6334	330.79	5	14	469
12	45.7597	331.166	6.85696	14	524
13	47.9236	328.8	5	14	570
14	48.0636	327.052	5	14	620
15	46.5599	326.701	5	14	670
16	45.8153	327.213	5	14	719
17	44.5761	328.762	6.57233	14	769
18	45.3576	328.528	7.16776	14	814
19	45.2325	330.003	6.81218	14	853
20	45.4275	330.322	7.50358	14	888
21	45.3972	338.229	8.08993	14	927
1	153.803	379.776	5	15	14
2	155.042	376.443	5	15	47
3	152.744	377.268	5	15	84
4	143.222	382.081	5	15	124
5	143.284	380.439	5	15	167
6	140.71	380.454	5	15	212
7	135.053	399.486	18.6868	15	278
8	134.081	398.632	12.9431	15	313
9	134.325	397.911	13.0884	15	367
10	134.103	396.414	12.8148	15	423
11	135.367	394.805	12.5243	15	475
12	160.748	395.67	5	15	521
13	161.8	395.999	5	15	571
14	161.692	395.627	5	15	622
15	160.458	395.689	5	15	672
16	154.135	396.499	5	15	722
17	154.871	398.317	5	15	766
18	154.695	396.406	5	15	812
19	153.823	395.432	5	15	852
20	153.753	395.435	5	15	887
21	153.739	395.48	5	15	926
22	153.35	395.283	5	15	961
23	153.577	396.625	5	15	999
24	153.761	396.87	5	15	1039
25	150.076	392.86	5	15	1076
26	153.916	394.386	5	15	1114
27	152.809	394.719	5	15	1150
28	154.028	395.055	5	15	1189
29	154.308	394.822	5	15	1227
30	154.799	397.264	5	15	1265
31	154.444	396.958	5	15	1301
32	153.87	395.547	5	15	1336
33	153.532	395.193	5	15	1372
34	152.95	394.733	5	15	1408
35	153.626	394.803	5	15	1439
36	154.748	396.867	5	15	1473
37	155.869	399.333	5	15	1509
38	156.58	397.677	5	15	1541
39	154.713	396.385	5	15	1571
40	153.917	395.46	5	15	1600
41	153.789	393.87	5	15	1636
42	151.834	394.096	5	15	1670
43	148.351	393.369	5	15	1701
44	144.824	392.876	5	15	1733
45	144.13	390.143	5	15	1765
46	100.08	370.477	7.10521	15	1804
47	99.6104	369.188	7.32194	15	1839
48	99.5665	367.074	7.06836	15	1870
49	99.3735	366.64	8.72602	15	1904
1	307.017	292.213	5	16	15
2	306.951	292.289	5	16	49
3	307.43	291.665	5	16	87
4	307.709	292.209	5	16	126
5	307.147	293.825	5	16	170
6	307.153	294.95	5	16	216
7	308.029	293.838	5	16	264
8	307.127	292.466	5	16	314
9	306.645	292.372	5	16	368
10	306.569	291.911	5	16	424
11	307.464	292.335	5	16	476
12	307.031	293.387	5	16	528
13	306.63	294.926	5	16	576
14	307.632	292.949	5	16	626
15	306.858	292.124	5	16	676
16	306.509	291.95	5	16	725
17	306.38	291.415	5	16	770
18	306.629	292.229	5	16	815
19	306.351	293.804	5	16	854
20	307.023	293.8	5	16	889
21	306.986	292.366	5	16	928
22	306.317	291.754	5	16	963
23	306.208	291.516	5	16	1001
24	306.508	291.437	5	16	1041
25	305.886	294.187	5	16	1080
26	306.03	294.241	5	16	1118
27	306.218	293.324	5	16	1155
28	305.778	292.424	5	16	1192
29	305.182	292.252	5	16	1230
30	305.064	292.21	5	16	1268
31	306.027	292.353	5	16	1306
32	305.594	293.875	5	16	1339
33	305.062	295.07	5	16	1376
34	306.768	293.407	5	16	1413
35	306.119	292.761	5	16	1443
36	306.247	292.352	5	16	1478
37	306.823	292.363	5	16	1513
38	307.676	292.41	5	16	1544
39	307.388	293.664	5	16	1573
40	308.071	294.138	5	16	1603
41	308.307	292.251	5	16	1638
42	307.705	291.52	5	16	1673
43	307.763	291.41	5	16	1704
44	308.167	291.707	5	16	1735
45	308.26	292.484	5	16	1767
46	306.795	294.194	5	16	1807
47	307.984	293.684	5	16	1840
48	307.63	292.401	5	16	1872
49	307.892	291.287	5	16	1906
50	307.088	291.351	5	16	1940
51	307.516	291.347	5	16	1969
52	307.185	293.162	5	16	2000
53	307.298	293.662	5	16	2030
54	308.095	293.188	5	16	2056
55	307.201	291.618	5	16	2082
56	306.919	291.292	5	16	2106
57	307.658	290.355	5	16	2131
58	308.072	291.037	5	16	2156
59	307.763	291.569	5	16	2182
60	306.434	294.185	5	16	2206
61	307.855	292.092	5	16	2231
62	307.2	291.132	5	16	2256
63	306.863	291.006	5	16	2279
64	306.844	290.46	5	16	2301
65	307.166	291.914	5	16	2322
66	306.969	293.147	5	16	2344
67	307.093	293.375	5	16	2362
68	307.583	292.139	5	16	2380
69	307.047	291.35	5	16	2398
70	306.918	291.243	5	16	2417
71	307.392	291.224	5	16	2438
72	308.681	292.13	5	16	2456
73	308.291	292.954	5	16	2476
74	309.212	292.35	5	16	2501
75	308.672	291.802	5	16	2526
76	308.43	291.37	5	16	2551
77	309.174	291.619	5	16	2578
78	308.912	291.248	5	16	2606
79	308.99	292.252	5	16	2636
80	307.795	294.107	5	16	2668
81	315.115	305.501	5	16	2701
82	308.504	291.315	5	16	2734
83	308.404	290.473	5	16	2766
84	309.246	289.369	5	16	2796
85	309.037	291.068	5	16	2827
86	309.311	292.173	5	16	2855
87	307.977	292.74	5	16	2884
88	308.113	290.406	5	16	2913
89	307.765	290.256	5	16	2939
1	361.577	352.4	13.717	17	16
2	362.936	351.283	14.0222	17	60
3	363.914	351.332	14.1641	17	97
4	361.698	351.968	13.2686	17	128
5	360.822	351.743	13.6472	17	172
6	361.369	351.04	14.0026	17	227
7	361.82	351.137	14.2205	17	279
8	362.343	350.395	14.0491	17	328
9	363.174	351.241	14.076	17	380
10	362.478	351.538	13.9767	17	436
11	361.927	351.421	14.1977	17	488
12	360.789	351.139	14.2318	17	540
13	360.837	350.741	14.2346	17	585
14	361.556	350.746	14.2459	17	638
15	361.889	352.823	13.2075	17	679
16	362.041	352.105	13.5824	17	728
17	361.489	352.097	13.9688	17	783
18	361.086	351.366	14.1579	17	827
19	361.279	352.235	14.1731	17	864
20	360.871	351.284	14.3774	17	900
21	360.957	351.56	14.1686	17	938
22	358.414	352.266	14.644	17	971
23	358.982	351.858	14.2411	17	1009
24	361.376	351.567	14.6755	17	1050
25	360.254	350.696	14.3779	17	1087
26	359.879	351.522	14.3977	17	1126
27	361.203	350.931	14.9487	17	1164
28	361.526	351.182	14.9131	17	1202
29	360.454	352.032	14.4922	17	1239
30	361.288	351.903	14.6664	17	1276
31	360.941	351.894	14.6138	17	1314
32	361.363	352.245	14.6696	17	1348
33	361.616	352.147	14.4897	17	1384
34	361.579	351.853	14.392	17	1418
35	362.098	352.229	14.5751	17	1452
36	362.821	351.393	14.607	17	1486
37	383.929	344.459	17.4065	17	1523
38	396.413	347.119	25	17	1558
40	396.728	346.668	25	17	1622
41	400.998	346.842	25	17	1656
42	398.766	349.141	25	17	1687
43	398.827	349.926	25	17	1718
44	399.213	347.9	25	17	1750
45	397.679	347.147	25	17	1785
46	396.573	346.857	25	17	1822
47	399.043	345.05	25	17	1857
48	402.672	346.138	25	17	1889
49	396.254	363.67	19.0815	17	1919
1	313.127	406.041	11.8443	18	17
2	313.891	407.233	12.0545	18	50
3	313.435	406.678	11.7801	18	88
4	313.428	406.405	11.6271	18	129
5	313.172	407.191	12.13	18	173
6	309.623	408.987	7.65051	18	217
7	307.165	408.348	5	18	265
8	307.185	409.032	5	18	315
9	307.376	410.204	5	18	369
10	307.595	410.635	5	18	425
11	308.023	409.422	5	18	477
12	308.193	407.548	5	18	529
13	309.408	403.825	7.80456	18	577
14	309.584	402.818	8.07876	18	627
15	311.411	397.582	6.33697	18	677
16	313.181	394.888	5	18	726
17	313.04	394.996	5	18	771
18	313.75	394.185	5	18	816
19	313.123	393.348	5	18	855
20	313.071	392.779	5	18	890
21	312.739	392.378	5	18	929
22	313.272	393.381	5	18	964
23	313.334	394.279	5	18	1002
24	313.419	394.633	5	18	1042
25	313.09	392.599	5	18	1081
26	313.307	392.703	5	18	1119
27	312.767	392.66	5	18	1156
28	313.322	392.294	5	18	1193
29	313.303	392.562	5	18	1231
30	313.315	394.015	5	18	1269
31	313.76	394.177	5	18	1307
32	313.049	393.075	5	18	1340
33	313.034	392.663	5	18	1377
34	313.035	392.624	5	18	1414
35	313.558	392.806	5	18	1444
36	313.884	393.977	5	18	1479
37	313.597	395.385	5	18	1515
38	314.691	394.082	5	18	1545
39	313.997	393.537	5	18	1574
40	313.305	393.171	5	18	1604
41	313.986	392.517	5	18	1639
42	314.049	393.458	5	18	1674
43	314.359	394.5	5	18	1705
44	314.095	395.383	5	18	1736
45	314.304	394.212	5	18	1768
46	313.598	393.375	5	18	1808
47	312.857	393.198	5	18	1841
48	313.336	392.565	5	18	1873
49	313.999	393.014	5	18	1907
50	313.127	394.168	6.4094	18	1941
51	313.625	394.757	5	18	1970
52	313.066	394.261	5	18	2001
53	313.585	393.349	6.87367	18	2031
54	312.682	392.743	5	18	2057
55	312.456	393.055	6.85215	18	2083
56	312.719	392.74	6.61574	18	2107
57	313.216	393.235	6.46053	18	2132
58	313.131	393.369	7.22441	18	2157
59	313.256	393.016	7.10131	18	2183
60	312.398	392.635	7.47838	18	2207
61	312.594	392.032	7.55393	18	2232
62	312.236	392.091	7.20155	18	2257
63	312.354	392.147	7.36396	18	2280
64	311.792	393.361	7.59268	18	2302
65	312.254	393.674	7.88346	18	2323
66	312.622	393.52	7.97366	18	2345
67	312.678	393.641	8.05423	18	2363
68	312.345	392.614	7.78258	18	2381
69	312.406	392.861	7.755	18	2399
70	312.457	393.353	7.73348	18	2418
71	313.102	394.253	7.6742	18	2439
72	314.165	394.328	7.85225	18	2457
73	314.184	393.642	7.8719	18	2477
74	314.16	392.808	7.15988	18	2502
75	313.779	392.943	7.61881	18	2527
76	314.118	392.436	7.1604	18	2552
77	314.477	394.351	7.81986	18	2579
78	314.134	394.204	7.72868	18	2607
79	314.482	394.859	8.17498	18	2637
80	314.148	394.035	7.91395	18	2669
81	313.654	392.989	8.03386	18	2702
82	313.569	392.506	7.88133	18	2735
83	313.952	392.391	7.95959	18	2767
84	314.119	392.563	7.92332	18	2797
85	314.505	393.455	7.88939	18	2828
86	314.853	393.879	7.989	18	2856
87	314.025	392.645	8.26828	18	2885
88	313.237	391.661	8.23579	18	2914
89	313.563	391.48	8.27559	18	2940
1	172.766	97.3765	14.2681	19	18
2	171.264	97.5008	14.0696	19	52
3	170.637	97.7363	14.0455	19	90
4	171.061	97.7701	14.2208	19	131
5	170.47	96.7088	13.7967	19	174
6	166.75	90.3351	15.8251	19	218
7	166.982	89.4985	15.794	19	267
8	167.21	89.6311	16.0245	19	317
9	167.317	90.9476	16.1124	19	370
10	169.872	96.2618	15.4723	19	426
11	171.926	96.4202	14.2578	19	478
12	171.068	95.5598	14.188	19	530
13	170.662	95.6325	14.3856	19	578
14	169.533	95.4063	14.4309	19	629
15	169.904	97.2491	14.4731	19	680
16	170.436	96.4926	14.3369	19	729
17	170.431	96.8241	14.3479	19	772
18	169.865	95.5465	14.1516	19	817
19	169.34	95.8718	14.2926	19	856
20	170.217	94.6921	14.4235	19	891
21	170.029	95.3129	14.4512	19	932
22	166.996	91.703	15.2737	19	966
23	169.667	96.1442	14.6256	19	1004
24	170.774	96.3484	14.6073	19	1044
25	169.815	94.9173	14.7066	19	1083
26	169.369	95.2519	14.4455	19	1120
27	169.854	95.1333	14.5446	19	1157
28	171.082	94.5901	14.5992	19	1194
29	170.841	95.2591	14.6519	19	1233
30	171.394	95.6627	14.7472	19	1270
31	170.746	95.3103	14.8529	19	1309
32	169.375	95.1577	14.5039	19	1342
33	170.431	94.7757	14.3884	19	1379
34	170.803	94.761	14.3312	19	1416
35	171.246	95.4096	14.3662	19	1447
36	172.166	95.8184	14.5241	19	1482
37	172.454	96.2744	14.3982	19	1518
38	171.793	95.2389	14.5074	19	1548
39	170.555	94.8168	14.3317	19	1578
40	169.814	95.3199	14.613	19	1607
41	170.54	95.8048	14.5378	19	1642
42	170.906	96.7161	14.6911	19	1677
43	170.904	96.5059	14.847	19	1708
44	170.832	96.3681	14.8609	19	1740
45	170	95.8421	14.7983	19	1772
46	169.329	95.4088	14.8126	19	1812
47	169.276	95.6102	14.7253	19	1845
48	169.556	95.08	14.6393	19	1876
49	169.215	95.9331	14.9813	19	1910
50	169.481	96.0268	15.0842	19	1945
51	169.66	96.3595	15.0663	19	1973
52	169.103	95.8507	14.9012	19	2005
53	169.313	94.5801	14.9169	19	2033
54	168.929	95.2429	15.0074	19	2059
55	167.093	93.7811	15.2802	19	2086
56	171.602	95.6415	15.0259	19	2109
57	171.34	95.265	15.0797	19	2135
58	168.487	95.3004	15.6807	19	2160
59	169.742	95.1255	15.4115	19	2186
60	167.322	93.3602	15.5709	19	2210
61	169.561	94.0936	15.1972	19	2234
62	170.076	94.784	15.1658	19	2259
63	170.353	95.2833	15.2832	19	2282
64	168.628	95.6778	15.6985	19	2304
65	168.475	94.1638	14.2416	19	2325
1	40.6104	179.583	14.1142	20	19
2	43.1286	180.947	14.6583	20	53
3	47.073	179.152	14.6832	20	92
4	48.1029	178.06	14.6861	20	133
5	47.8026	177.916	15.0374	20	175
6	48.6577	178.295	15.2399	20	219
7	47.3136	179.593	16.8894	20	270
8	47.1798	180.378	15.6313	20	318
9	48.1406	179.355	15.5705	20	371
10	51.0207	179.401	16.4682	20	428
11	51.7842	179.026	16.7352	20	480
12	52.6483	179.22	16.8631	20	533
13	54.583	180.223	17.3213	20	581
1	68.5823	104.783	20.8836	21	20
2	67.0875	104.44	19.0794	21	54
3	67.2557	103.732	20.7799	21	93
4	69.9677	107.274	21.6176	21	134
5	69.4273	104.072	23.1323	21	176
6	69.2645	106.532	23.7462	21	222
7	69.6119	104.622	25	21	284
1	410.71	122.352	14.1588	22	21
2	411.589	122.403	14.0564	22	56
3	412.023	121.609	13.3127	22	82
4	411.643	120.591	13.4143	22	122
5	411.349	120.46	13.7305	22	165
6	411.909	120.92	13.6819	22	210
7	411.958	121.805	13.5604	22	258
8	411.653	123.313	13.737	22	308
9	412.711	122.923	13.1911	22	361
10	411.701	121.547	13.3938	22	416
11	411.387	120.62	13.5337	22	468
12	410.862	121.252	13.9506	22	536
13	411.251	121.131	13.704	22	568
14	411.458	121.38	14.0517	22	634
15	410.919	123.22	13.8819	22	683
16	410.8	122.352	13.8725	22	733
17	410.942	121.577	13.8933	22	778
1	496.194	36.9155	17.508	23	22
2	496.446	37.8369	17.3994	23	57
3	496.489	37.7005	17.2015	23	94
4	496.741	38.7825	17.6447	23	136
5	498.149	38.3862	18.044	23	178
6	503.103	39.3814	16.5043	23	224
7	507.934	50.5571	20.195	23	277
8	507.934	46.807	18.322	23	325
9	507.934	48.2109	19.1932	23	377
10	507.934	48.08	19.062	23	433
11	506.836	47.2812	18.2302	23	485
12	504.286	47.8474	18.119	23	537
13	504.427	47.8038	18.1398	23	584
14	507.053	47.0984	18.8436	23	636
15	507.934	49.3035	17.1611	23	685
1	507.934	47.2945	18.728	24	23
2	507.934	49.2214	19.393	24	58
3	500.347	47.5726	16.7557	24	95
4	491.178	47.4099	15.1615	24	135
5	486.19	39.8855	20.2909	24	179
6	484.151	40.4837	18.9701	24	225
7	491.895	47.5529	14.8859	24	275
1	200.665	420.974	15.0857	25	24
2	201.642	422.352	14.948	25	59
3	201.823	421.814	15.3427	25	96
4	201.574	421.188	14.8648	25	137
5	201.455	421.214	14.1952	25	180
6	201.848	421.184	14.6479	25	226
7	202.312	422.168	11.977	25	263
9	166.194	419.444	5	25	365
10	158.604	412.285	5	25	420
11	157.158	410.667	5	25	471
12	156.474	407.13	5	25	523
13	152.317	396.041	9.2284	25	574
14	152.713	393.139	9.58452	25	625
15	152.27	392.352	7.84853	25	674
16	144.305	391.828	5	25	721
17	144.547	393.335	5	25	765
18	145.12	392.585	5	25	811
19	144.503	391.472	5	25	851
20	143.483	389.815	5	25	886
21	142.813	389.474	5	25	925
22	143.338	380.208	7.75248	25	962
1	398.503	412.942	14.9827	26	25
2	399.027	413.534	15.1554	26	61
3	399.052	413.776	15.2914	26	98
4	398.627	412.776	15.0728	26	139
5	398.681	412.884	14.9117	26	181
6	398.715	412.947	15.5179	26	228
7	399.135	413.516	15.2384	26	280
8	399.253	414.321	15.3293	26	329
9	399.188	413.869	15.0397	26	381
10	399.149	413.282	15.5002	26	438
11	399.013	412.524	15.287	26	489
12	398.813	411.816	15.5393	26	541
13	398.732	411.786	15.5896	26	586
14	399.126	412.54	15.486	26	639
15	399.316	413.25	15.5508	26	688
16	398.684	411.858	15.3942	26	736
17	398.501	412.407	15.5658	26	784
18	398.617	410.257	15.9096	26	828
19	398.297	410.502	15.7971	26	865
20	399.035	411.06	15.7585	26	901
21	398.498	411.948	16.2077	26	939
22	398.691	412.663	16.1461	26	972
23	398.702	412.39	16.1109	26	1010
24	398.68	412.236	16.1304	26	1051
25	398.515	411.209	15.8218	26	1088
26	398.141	410.838	16.1757	26	1127
27	398.157	411.633	16.0623	26	1165
28	398.867	411.174	16.4074	26	1205
29	398.163	411.92	16.5219	26	1242
30	398.024	411.309	16.8817	26	1279
31	398.462	411.204	16.4573	26	1316
32	397.954	410.719	16.2012	26	1350
33	399.143	410.445	15.9524	26	1386
34	398.938	412.501	16.6221	26	1420
35	399.197	412.312	16.1575	26	1453
36	399.873	412.493	16.4211	26	1488
37	400.097	414.511	16.6697	26	1524
38	399.436	411.64	16.2496	26	1553
39	398.866	410.868	15.9564	26	1586
40	398.399	409.149	16.1258	26	1617
41	398.821	410.291	16.4509	26	1651
42	399.972	413.673	16.4276	26	1684
43	399.701	413.274	16.4931	26	1715
44	399.447	412.622	16.0202	26	1747
45	399.107	411.995	15.7993	26	1782
46	398.671	412.982	16.7249	26	1819
47	398.669	413.789	16.4096	26	1852
1	506.14	347.818	20.2323	27	26
2	502.561	349.642	20.1517	27	62
3	501.235	350.156	20.0364	27	99
4	501.731	352.023	19.7991	27	141
5	501.74	359.151	19.4789	27	185
6	502.182	362.032	19.2293	27	230
7	501.621	359.522	19.5179	27	282
8	500.76	358.997	18.9088	27	333
9	500.858	358.409	19.629	27	384
10	501.658	359.91	19.4544	27	441
11	502.146	361.853	19.3524	27	490
12	501.455	357.962	19.8385	27	542
13	501.412	357.196	20.0694	27	588
14	502.891	350.506	20.3419	27	640
15	501.724	349.456	20.2832	27	689
16	501.701	349.811	20.1456	27	737
17	501.554	350.308	20.2455	27	785
18	502.77	349.955	20.2639	27	829
19	502.413	349.337	20.6715	27	866
20	502.513	351.038	20.5751	27	902
21	502.652	350.396	20.5853	27	940
22	501.164	351.59	20.6761	27	973
23	500.28	353.25	20.0052	27	1011
24	501.791	371.37	20.2773	27	1052
25	493.847	376.442	23.2279	27	1093
26	489.301	374.36	25	27	1134
1	372.528	484.321	21.0479	28	27
2	381.085	490.03	25	28	68
3	378.112	488.984	25	28	107
4	378.706	490.837	25	28	149
5	379.868	491.867	25	28	193
6	379.727	492.985	25	28	238
7	375.776	489.415	25	28	291
8	370.236	479.975	20.8675	28	334
9	367.301	476.569	17.6953	28	383
10	366.995	468.313	17.3954	28	440
11	373.801	463.267	19.3992	28	491
12	378.392	457.825	20.8504	28	544
13	378.256	457.901	20.4457	28	590
14	380.543	458.649	21.0129	28	641
15	384.435	457.324	22.9108	28	690
16	382.801	457.262	22.4576	28	738
17	384.339	456.237	25	28	792
1	16.9145	154.618	25	29	28
2	23.217	160.712	25	29	64
3	19.6379	156.467	25	29	103
4	17.0106	154.664	25	29	145
5	19.7459	153.993	25	29	188
6	22.5809	155.233	25	29	233
7	44.6715	169.145	19.5681	29	272
8	41.1032	181.071	25	29	337
9	44.6777	207.93	9.97405	29	352
10	58.9852	207.191	12.6516	29	408
11	59.8842	210.279	10.5486	29	458
12	59.3618	212.931	9.18918	29	507
1	124.071	219.49	25	30	29
2	123.905	218.401	22.6564	30	55
3	122.197	220.493	25	30	104
4	121.629	220.42	25	30	146
5	120.348	223.16	25	30	189
6	158.098	222.03	10.0313	30	200
1	495.061	336.754	25	31	30
2	489.13	327.092	25	31	65
3	489.367	325.344	25	31	105
4	490.327	318.728	25	31	147
5	490.442	315.94	25	31	190
6	488.484	316.255	25	31	235
8	488.963	312.898	25	31	339
9	488.609	316.247	25	31	391
1	398.03	350.627	25	32	31
2	396.8	349.151	25	32	66
3	397.832	351.268	25	32	106
4	398.073	349.359	25	32	148
5	396.488	348.467	25	32	191
6	395.121	349.056	25	32	236
7	394.72	348.497	25	32	289
8	398.096	349.731	25	32	341
9	398.735	349.535	25	32	393
10	400.19	349.481	25	32	448
11	399.543	348.088	25	32	497
12	397.922	345.042	25	32	550
13	394.371	347.963	25	32	598
14	397.834	346.217	25	32	649
15	397.495	350.678	25	32	698
16	396.729	350.415	25	32	747
17	393.407	359.851	25	32	791
18	394.16	347.943	25	32	832
19	395.04	347.827	25	32	868
20	391.022	349.533	25	32	905
21	394.166	346.583	25	32	942
22	397.134	347.733	25	32	978
23	398.855	347.668	25	32	1019
25	394.591	346.997	25	32	1096
26	394.118	346.812	25	32	1133
27	396.157	346.756	25	32	1172
28	397.293	347.236	25	32	1210
29	397.718	346.836	25	32	1247
30	397.107	347.502	25	32	1284
32	394.609	346.846	25	32	1355
33	396.942	346.271	25	32	1392
34	398.884	347.957	25	32	1423
35	398.06	347.927	25	32	1456
36	398.641	348.387	25	32	1493
37	411.682	344.063	14.907	32	1521
38	410.223	324.763	25	32	1557
1	306.962	358.569	25	33	32
2	306.952	358.878	25	33	67
4	308.088	362.091	17.5457	33	140
5	308.85	361.326	17.6522	33	183
6	311.802	366.86	19.8768	33	231
7	311.891	368.111	22.0185	33	283
8	304.509	364.1	25	33	343
9	304.184	362.761	25	33	395
10	306.228	362.064	25	33	449
11	308.003	358.563	25	33	498
12	307.95	360.55	20.2533	33	543
13	307.866	360.225	20.2699	33	589
14	307.189	357.327	22.8341	33	642
15	307.039	357.377	25	33	699
17	306.494	357.855	25	33	790
2	172.558	417.592	8.09635	34	48
3	146.043	404.834	7.32491	34	86
4	146.059	404.448	7.42007	34	125
5	145.941	405.271	7.07379	34	169
6	145.775	404.449	7.79689	34	215
7	145.511	403.711	8.16092	34	262
8	146.704	404.936	5	34	311
9	146.673	405.922	5	34	364
10	147.783	407.16	5	34	419
11	149.838	406.717	5	34	470
12	149.163	405.066	5	34	522
13	145.845	403.557	7.4212	34	573
14	145.928	402.961	7.39961	34	623
15	146.196	403.699	5	34	673
2	294.478	422.609	11.4825	35	51
3	294.389	421.973	11.5959	35	89
4	294.431	422.322	11.5483	35	130
5	293.972	425.918	8.02124	35	171
7	293.85	453.31	5	35	266
2	316.102	390.981	22.8447	36	63
3	323.576	385.763	19.4956	36	100
4	326.535	385.259	20.1121	36	142
5	334.44	380.524	17.3373	36	184
6	342.522	377.872	17.0123	36	229
8	370.838	353.483	25	36	342
3	144.606	379.737	5	37	85
5	135.217	386.652	5	37	168
6	132.904	387.426	5	37	213
7	130.953	386.998	5	37	260
8	128.71	386.783	5	37	310
9	130.003	388.67	5	37	363
3	238.878	129.56	15.1049	38	91
4	235.883	123.651	14.5567	38	132
5	230.403	121.175	13.529	38	158
6	230.635	120.807	13.0992	38	202
7	230.765	120.82	13.2196	38	250
8	230.894	121.346	12.9795	38	301
3	104.291	120.405	25	39	101
4	102.172	119.131	25	39	143
5	100.826	119.897	22.6722	39	177
6	99.8839	121.336	22.8181	39	223
7	100.436	121.013	23.084	39	274
8	100.104	122.09	25	39	336
9	99.5446	123.213	25	39	386
10	98.1712	120.848	23.1714	39	431
11	97.863	120.85	23.0501	39	483
12	94.5263	113.566	20.3335	39	534
13	95.5591	112.739	19.9994	39	582
14	96.6681	110.741	21.4391	39	633
16	99.8713	113.006	25	39	740
17	96.4285	109.419	21.3681	39	773
18	96.5169	109.645	19.2875	39	820
19	97.3387	109.596	19.6363	39	860
20	97.8216	108.433	21.898	39	895
21	103.941	105.047	21.7487	39	934
22	112.011	99.1918	25	39	974
23	111.985	97.4938	25	39	1014
3	64.6442	127.514	25	40	102
4	70.2068	128.248	25	40	144
5	78.5502	129.847	25	40	187
6	77.628	129.528	25	40	232
7	74.7662	113.585	21.9107	40	273
8	74.817	112.742	25	40	335
9	75.2669	115.689	25	40	385
10	74.0992	111.584	25	40	442
11	87.3051	139.153	25	40	492
12	90.8209	139.407	25	40	546
13	88.5518	138.842	25	40	592
14	86.5639	144.37	25	40	643
15	84.0868	146.178	25	40	691
16	84.9136	145.01	25	40	741
4	19.6213	161.168	6.56241	41	112
5	9.84456	165.14	9.98301	41	154
6	9.57833	165.95	9.90306	41	199
7	8.98075	166.463	9.94638	41	246
8	8.95726	164.094	9.93428	41	298
9	9.19441	163.6	10.1517	41	351
10	9.10783	163.443	10.2923	41	405
11	9.17588	165.725	9.91369	41	457
12	11.0876	192.39	10.5672	41	506
13	9.88955	192.265	10.8256	41	557
14	10.8683	191.298	12.28	41	610
15	0	196.972	13.0451	41	660
4	336.57	488.488	7.5758	42	127
5	360.573	480.251	14.5364	42	182
6	380.784	507.934	25	42	239
7	380.264	503.678	25	42	292
8	378.715	501.905	25	42	344
9	365.919	501.919	25	42	397
10	366.066	502.389	25	42	451
11	362.721	503.17	25	42	500
12	380.417	502.952	25	42	551
13	381.473	507.934	25	42	600
14	379.905	502.418	25	42	650
15	379.848	503.638	25	42	700
16	380.115	503.962	22.9672	42	739
17	380.339	502.161	25	42	793
18	380.864	506.631	25	42	833
19	381.333	505.578	25	42	869
20	380.884	504.061	25	42	906
21	379.875	502.446	25	42	943
22	379.22	501.695	25	42	981
23	380.147	503.53	22.6699	42	1013
24	380.488	503.573	25	42	1058
25	380.902	505.76	25	42	1097
26	381.112	506.007	25	42	1135
27	379.517	501.465	25	42	1174
28	380.27	502.935	25	42	1212
29	364.994	492.866	25	42	1250
30	365.873	494.548	25	42	1288
31	363.862	491.409	25	42	1323
32	366.831	497.226	25	42	1358
4	346.978	410.741	16.0823	43	138
5	338.625	377.96	25	43	192
6	315.253	381.139	25	43	237
7	315.064	384.242	25	43	290
8	321.211	379.908	12.4626	43	316
10	305.351	364.37	15.274	43	437
5	296.37	416.697	20.1872	44	186
7	304.587	442.264	14.1402	44	281
8	303.166	444.528	14.6801	44	330
9	302.526	445.5	14.0738	44	382
10	305.321	441.569	14.6926	44	439
6	51.4961	170.367	6.92676	45	198
7	61.5375	174.705	8.91047	45	247
8	61.7653	177.334	5	45	294
9	61.9962	176.97	5	45	346
10	62.5351	170.468	8.42255	45	403
11	66.181	164.247	10.1239	45	456
12	64.6116	158.125	9.03181	45	505
13	66.1804	154.136	9.45646	45	556
14	72.0922	147.927	5	45	602
15	72.8732	148.15	5	45	652
16	74.1061	150.396	5	45	702
17	70.458	149.479	5	45	749
18	64.0047	142.96	5	45	795
19	65.5458	143.892	6.57291	45	835
20	69.455	146.094	5	45	871
21	74.2907	148.345	5	45	908
22	81.4675	152.833	5	45	945
23	82.4441	159.168	10.117	45	984
24	83.4637	161.575	11.0654	45	1023
25	83.4108	164.291	11.6172	45	1064
26	82.95	166.561	12.0893	45	1103
27	83.2146	171.064	11.6799	45	1141
28	85.5628	175.449	12.0792	45	1180
29	88.4791	176.301	12.5541	45	1218
30	90.2637	177.349	12.6956	45	1256
31	90.5858	178.626	12.5086	45	1294
32	90.9508	179.925	12.0751	45	1329
33	91.2973	179.92	12.0086	45	1364
34	92.4566	182.255	11.7972	45	1400
35	92.2325	184.171	11.1525	45	1429
36	92.8802	185.14	10.9626	45	1463
37	93.3765	187.123	10.1681	45	1497
38	93.6405	186.615	9.7263	45	1530
39	95.8361	191.695	8.35144	45	1560
40	100.901	192.892	7.30673	45	1592
41	103.338	194.674	6.62849	45	1625
42	105.298	198.665	7.86521	45	1659
43	105.696	199.857	9.23041	45	1692
44	105.69	199.863	8.95625	45	1722
45	105.792	205.6	9.44993	45	1754
46	105.317	209.842	9.23356	45	1793
47	102.604	208.208	9.8904	45	1829
49	95.3113	204.04	12.6656	45	1895
50	97.0828	205.613	11.5468	45	1930
52	95.71	206.42	10.1445	45	1990
6	203.25	435.254	5	46	214
7	203.013	428.741	5	46	261
8	201.974	431.913	5	46	312
9	200.431	434.395	5	46	366
10	202.923	431.646	5	46	421
11	203.529	427.165	5	46	472
12	191.145	432.532	9.51396	46	527
13	189.749	432.002	10.0725	46	575
14	187.741	430.104	8.44751	46	624
15	189.178	430.57	9.25242	46	675
16	188.628	430.806	7.89413	46	724
17	193.759	421.274	5	46	767
18	177.926	428.453	17.4851	46	826
6	213.212	31.8746	21.3606	47	221
7	216.948	36.2976	19.3963	47	271
8	216.34	38.8383	17.1178	47	320
9	216.4	39.8677	17.9924	47	373
10	216.302	40.7134	19.0426	47	429
11	215.946	42.7115	19.7737	47	481
12	218.182	48.831	25	47	545
13	219.154	52.6382	25	47	591
14	219.029	42.6433	22.7316	47	632
15	229.395	44.0593	20.1989	47	682
16	230.474	43.3412	19.7252	47	731
17	223.765	31.8014	19.7325	47	774
18	226.476	26.2664	19.259	47	819
19	227.215	25.0772	17.9561	47	859
21	209.944	36.7064	15.0053	47	931
6	429.595	316.555	25	48	234
7	419.89	308.022	25	48	287
9	410.533	241.231	25	48	389
10	403.721	201.252	9.13873	48	415
12	386.947	190.841	10.714	48	519
13	387.937	182.161	5	48	563
14	387.152	184.358	6.67638	48	616
15	387.952	184.123	5	48	663
16	387.891	184.716	5	48	713
17	387.543	184.137	5	48	760
18	387.81	183.23	6.81722	48	808
19	387.78	182.215	6.82628	48	849
20	387.874	181.598	7.67927	48	882
21	382.788	187.378	6.24626	48	917
22	387.412	189.858	8.53671	48	956
23	384.68	187.708	8.00671	48	992
24	379.472	165.064	5	48	1029
7	49.1128	168.275	5	49	242
8	61.7677	169.987	22.0134	49	322
9	33.321	178.175	25	49	387
10	49.5912	207.116	8.73755	49	404
12	56.8521	242.504	12.5141	49	511
7	73.5046	151.506	9.92817	50	245
8	73.6919	150.986	7.92646	50	297
9	74.5233	151.251	8.48446	50	349
10	73.2806	151.433	7.86458	50	402
11	76.1669	150.51	5	50	453
12	76.5775	150.139	5	50	502
13	82.4726	153.88	5	50	553
14	85.7676	154.275	5	50	603
15	85.3726	154.572	5	50	653
16	84.4911	154.761	5	50	703
17	85.3205	154.853	5	50	750
18	85.4118	153.83	5	50	796
19	84.6586	153.132	8.42354	50	836
20	84.8033	154.368	10.71	50	874
21	84.5933	155.968	10.1128	50	911
7	349.171	178.102	5	51	254
9	356.661	176.657	14.405	51	376
10	365.322	171.747	12.4366	51	417
12	385.449	143.527	17.4927	51	538
7	387.308	184.465	9.33259	52	257
8	389.061	182.273	5	52	304
9	388.69	184.029	5	52	358
10	386.24	186.917	5	52	411
12	374.4	180.273	10.0383	52	518
7	65.7403	103.669	17.1644	53	269
8	66.9537	104.166	19.0477	53	321
9	65.6557	103.063	19.0594	53	374
10	68.5264	102.466	21.0687	53	430
11	75.1585	106.909	21.0937	53	482
12	85.0774	105.303	17.1494	53	532
13	90.2431	103.593	16.261	53	579
14	88.6142	101.823	16.3895	53	630
15	93.7227	109.125	17.6139	53	681
16	91.443	107.16	17.6562	53	730
17	90.4481	102.307	20.1612	53	775
18	88.6906	102.123	14.8738	53	818
19	89.9351	102.243	14.688	53	857
20	92.2863	102.361	17.0342	53	894
21	93.732	99.2932	16.7618	53	933
22	103.841	93.2243	18.5721	53	967
23	106.443	92.1926	19.9611	53	1005
25	85.2886	143.745	25	53	1094
26	87.5128	170.654	25	53	1132
7	476.146	72.4384	25	54	285
8	471.477	79.3043	20.8537	54	326
9	467.638	79.0544	19.5386	54	378
10	468.025	79.177	19.657	54	434
11	466.906	74.0559	19.865	54	487
12	465.747	75.5591	21.4486	54	539
14	454.007	82.0741	25	54	645
15	456.049	81.8653	25	54	693
17	406.89	65.3306	25	54	786
18	370.524	64.7504	15.5797	54	822
7	80.1135	505.631	25	55	286
8	80.908	499.449	25	55	338
9	79.1507	501.475	25	55	390
10	79.8949	507.934	25	55	445
11	80.7639	507.934	25	55	494
12	82.5049	507.934	25	55	548
13	80.8593	507.934	25	55	594
14	82.6178	502.957	25	55	646
15	84.2165	497.658	18.4824	55	687
16	90.6953	496.292	17.7528	55	735
17	93.9167	492.188	18.0222	55	781
18	100.411	482.301	13.909	55	825
19	96.49	480.763	14.3448	55	862
20	93.6148	480.193	14.4912	55	898
21	92.4476	482.028	15.1987	55	937
22	91.0806	481.408	14.7649	55	970
23	93.3907	474.397	12.3002	55	1000
24	104.993	463.634	12.2687	55	1040
25	114.431	460.685	12.6106	55	1079
26	123.147	459.213	12.7241	55	1117
27	128.214	452.519	13.4385	55	1154
28	136.328	449.623	12.8657	55	1191
29	145.279	449.525	12.0417	55	1229
30	145.436	440.391	7.55177	55	1266
7	486.54	326.227	25	56	288
8	486.65	325.479	25	56	340
9	488.301	324.164	25	56	392
10	489.518	324.713	25	56	446
11	489.635	323.885	25	56	495
13	487.215	324.106	25	56	596
15	488.451	324.302	25	56	696
8	339.918	178.181	15.9841	57	324
10	341.557	185.593	25	57	444
11	340.641	184.867	25	57	493
12	360.44	174.848	10.0572	57	517
14	342.237	185.995	20.2788	57	637
15	344.996	189.262	25	57	694
16	348.303	199.807	25	57	744
8	235.81	282.255	15.2286	58	327
9	234.939	283.381	14.6643	58	379
10	235.031	284.482	14.2745	58	435
11	233.18	286.598	13.1101	58	474
12	228.831	285.277	10.393	58	526
13	222.081	287.16	5	58	569
14	221.621	285.181	5	58	619
15	220.893	284.023	5	58	669
16	216.441	275.509	5	58	718
17	213.988	266.556	7.32724	58	768
18	215.155	261.354	8.47336	58	813
8	359.506	439.222	16.9868	59	331
9	359.136	460.562	25	59	396
10	358.468	460.379	25	59	450
11	357.489	468.417	25	59	499
13	364.622	446.002	25	59	599
8	488.616	356.45	20.9852	60	332
9	488.643	353.203	25	60	394
10	486.197	347.58	25	60	447
11	485.821	345.662	25	60	496
12	481.153	341.774	25	60	549
13	473.643	341.577	25	60	597
14	448.475	337.555	25	60	648
15	450.13	340.776	25	60	697
9	377.385	65.1697	25	61	388
10	414.766	61.015	25	61	443
11	410.322	62.7246	20.85	61	486
12	407.381	63.143	25	61	547
13	405.079	64.3082	25	61	593
14	404.44	65.9223	25	61	644
15	406.552	70.254	25	61	692
16	406.49	66.5827	25	61	742
17	427.075	63.6158	16.1919	61	777
10	71.3238	359.745	8.64255	62	422
11	65.1383	358.593	8.67979	62	473
12	60.9838	361.436	7.1293	62	525
13	61.7239	360.005	7.01256	62	572
14	57.8378	360.623	5.88063	62	621
15	53.4794	360.837	5	62	671
16	60.6748	358.771	7.57307	62	723
11	435.643	217.64	11.0322	63	467
12	433.217	219.567	10.6454	63	520
13	416.606	208.601	14.7752	63	583
14	407.756	220.623	16.0566	63	635
15	404.452	219.125	15.5968	63	684
16	403.101	218.925	16.3991	63	734
17	402.28	217.028	17.011	63	780
18	401.275	209.672	19.9176	63	823
20	433.913	215.44	11.604	63	884
21	444.821	209.439	13.4026	63	922
22	452.712	203.836	11.9424	63	958
23	474.554	187.379	10.1054	63	996
24	474.878	188.494	10.179	63	1036
25	477.918	186.88	9.78538	63	1072
26	473.988	187.996	9.96444	63	1110
27	507.934	173.814	7.76744	63	1145
28	507.934	176.351	8.78237	63	1187
13	361.127	255.475	21.065	64	587
14	370.151	269.257	11.8664	64	628
15	369.345	270.076	11.1223	64	678
16	367.607	271.966	11.3598	64	727
17	358.615	224.723	25	64	788
18	369.419	203.02	22.4109	64	824
20	370.05	187.601	14.0099	64	897
21	369.953	188.008	13.9805	64	936
22	369.763	187.396	14.4445	64	969
23	369.477	186.86	14.2138	64	1007
24	369.316	185.723	14.7774	64	1046
13	356.334	272.636	25	65	595
14	353.812	271.537	25	65	647
15	355.501	269.451	25	65	695
16	353.755	267.583	25	65	746
17	352.533	259.518	25	65	789
18	349.435	257.278	25	65	831
19	344.302	255.881	25	65	867
20	353.253	269.52	22.3967	65	904
22	374.232	250.179	25	65	976
23	374.946	247.693	25	65	1015
14	110.812	215.829	10.3111	66	606
16	111.288	216.872	10.0801	66	707
17	111.583	216.531	10.0572	66	754
18	111.114	216.842	9.99509	66	800
19	111.372	216.036	10.3093	66	840
21	110.584	214.974	10.2849	66	912
22	110.099	215.034	10.2686	66	948
23	110.287	215.576	10.2826	66	985
24	110.443	215.98	10.1945	66	1024
25	109.396	215.615	10.296	66	1061
26	108.754	215.865	10.1071	66	1100
27	108.162	215.171	10.0143	66	1138
28	109.306	213.897	10.068	66	1177
14	168.196	161.426	17.2358	67	631
15	163.201	163.261	5	67	654
16	159.109	164.908	5	67	704
17	159.789	163.97	5	67	751
18	156.061	166.457	5	67	797
19	164.495	198.91	10.5171	67	839
20	121.313	218.009	15.5661	67	892
22	120.612	219.365	25	67	975
15	501.319	59.162	20.5	68	686
16	501.786	62.108	15.0089	68	732
17	502.611	63.2206	14.7643	68	776
18	502.57	63.0544	14.6084	68	821
19	502.69	64.1095	14.5819	68	861
20	503.093	65.6352	14.3905	68	896
21	502.13	62.4757	15.3512	68	935
22	502.189	62.431	15.497	68	968
23	502.064	62.5263	15.376	68	1006
24	502.299	61.5037	15.444	68	1045
25	501.57	60.584	15.5805	68	1084
26	501.348	60.5272	15.1485	68	1123
27	502.633	63.3902	15.1933	68	1159
28	502.527	61.9659	15.4195	68	1196
29	503.148	64.2729	15.1932	68	1235
30	503.605	64.5433	14.8998	68	1272
31	503.074	65.6507	14.5651	68	1312
32	503.555	66.1897	13.9693	68	1344
33	504.159	66.1688	13.895	68	1382
34	506.319	67.5827	13.65	68	1404
35	503.576	65.712	14.4574	68	1449
36	503.984	66.6781	14.0858	68	1484
37	506.762	69.0225	13.4293	68	1505
38	506.195	68.7261	13.2051	68	1538
39	507.934	68.8387	13.1118	68	1569
40	498.104	68.1496	13.8283	68	1611
41	489.528	71.014	14.338	68	1646
42	489.161	71.03	14.3921	68	1680
43	488.512	71.4847	14.3467	68	1711
44	487.501	76.8449	15.3576	68	1743
[truncated: 3,748 more rows]
