# Supplementary material for: Functional visualization of NK cell-mediated killing of metastatic single tumor cells
Source: eLife journal article supplement (doi:10.7554/elife.76269), 2022-02-03
Supplement: supp [file tumor_1.xlsx]

## Sheet: Sheet1
1	135.758	36.576	11.5093	1	0
2	136.168	36.8299	11.5407	1	37
3	136.353	37.0566	11.8697	1	76
4	136.06	37.399	11.8612	1	113
5	137.083	37.1103	12.1732	1	152
6	136.385	37.7847	12.4647	1	190
7	136.597	37.9591	12.7042	1	229
8	136.837	37.654	12.9053	1	267
9	136.902	37.823	12.978	1	305
10	137.399	38.0099	12.9689	1	344
11	137.346	38.167	12.9401	1	383
12	136.916	38.4607	12.912	1	422
13	137.055	38.3571	12.8827	1	461
14	136.54	38.7915	12.995	1	502
15	137.385	37.9895	12.547	1	543
16	137.805	37.3748	12.9847	1	585
17	137.662	37.838	13.2338	1	627
18	137.73	37.3054	13.4164	1	670
19	137.728	37.307	13.3627	1	713
20	138.584	37.0848	13.6047	1	754
21	139.481	36.2056	13.7401	1	797
22	139.282	36.0907	13.9833	1	840
23	139.415	35.9957	14.0995	1	882
24	139.554	35.8149	14.2401	1	924
25	140.763	34.757	14.2766	1	987
26	140.997	34.5407	14.2693	1	1027
27	140.817	34.4559	14.5608	1	1069
28	140.551	34.8988	14.8197	1	1110
29	140.564	34.7832	14.9094	1	1152
30	141.595	34.0804	14.9387	1	1193
31	141.741	33.6694	14.9727	1	1233
32	141.658	33.6944	15.0012	1	1275
33	140.75	34.3018	15.1723	1	1315
34	141.685	33.6976	15.3358	1	1354
35	141.657	33.6721	15.4787	1	1396
36	141.73	33.6061	15.706	1	1440
37	141.977	33.3442	15.7406	1	1482
38	142.969	32.9697	15.803	1	1527
39	142.607	33.7085	16.0447	1	1569
40	141.809	34.3578	16.4441	1	1612
41	142.21	34.521	16.4225	1	1654
42	144.451	33.0991	16.4147	1	1696
43	145.004	32.3902	16.5795	1	1741
44	145.721	32.0451	16.4443	1	1785
45	145.813	32.2181	16.333	1	1830
46	145.183	33.3321	16.9486	1	1871
47	145.364	33.7403	17.1165	1	1917
48	145.555	33.6962	17.2018	1	1964
49	145.644	33.6015	17.2312	1	2010
50	145.802	33.6962	17.4892	1	2054
51	146.036	33.7688	17.5713	1	2095
52	146.016	33.8823	17.6029	1	2138
53	145.913	34.2097	17.7743	1	2180
54	145.604	35.1213	17.7955	1	2224
55	145.484	35.282	17.6719	1	2270
56	145.349	35.2234	17.8291	1	2312
57	145.425	35.1252	17.7378	1	2358
58	145.34	34.9989	17.9399	1	2404
59	145.538	34.8861	17.8626	1	2449
60	145.035	35.2174	17.9036	1	2492
61	144.61	35.9823	18.1599	1	2536
62	144.324	36.0548	18.3183	1	2580
63	144.384	35.9407	18.4216	1	2622
64	144.262	36.0053	18.1441	1	2663
65	144.185	35.9507	18.1619	1	2707
66	144.425	35.7232	18.4232	1	2749
67	145.022	35.1035	18.5947	1	2790
68	144.306	35.6735	18.569	1	2830
69	144.551	35.8271	18.7917	1	2871
70	144.446	35.9073	19.1336	1	2912
71	143.911	36.6372	19.5624	1	2955
72	143.683	36.3907	19.5181	1	2999
73	143.641	36.3198	19.6314	1	3043
74	144.33	36.1278	19.5835	1	3085
75	144.337	36.1826	19.6182	1	3128
76	144.422	36.0952	19.4509	1	3170
77	144.482	36.0542	19.98	1	3212
78	143.756	36.2854	20.2531	1	3254
79	143.293	36.9636	20.6339	1	3294
80	143.509	37.043	20.5177	1	3338
81	142.893	37.3806	20.6079	1	3383
82	142.772	37.8893	20.8989	1	3428
83	142.433	38.7657	21.549	1	3471
84	144.968	37.6144	22.4156	1	3518
85	143.545	38.7325	23.5093	1	3566
86	145.41	38.0069	24.2215	1	3614
87	143.686	38.8218	25.5	1	3678
88	144.213	38.9959	25.5	1	3726
89	143.778	39.2734	25.5	1	3776
90	143.998	39.4869	25.5	1	3827
91	143.84	39.8439	25.5	1	3876
92	142.901	40.6907	25.5	1	3928
93	145.179	39.7641	25.5	1	3979
95	149.71	37.8283	25.5	1	4084
96	149.596	37.415	24.0142	1	4118
97	149.036	37.321	24.2126	1	4171
98	149.672	37.4149	25.5	1	4245
99	149.513	36.8219	23.6252	1	4281
100	148.812	37.0669	23.8768	1	4336
101	148.259	37.1213	23.9715	1	4391
102	148.51	37.1578	23.9341	1	4448
103	148.567	37.1001	23.8542	1	4505
104	148.612	37.5236	25.5	1	4575
105	149.138	37.5641	25.5	1	4634
106	142.669	40.6435	25.5	1	4688
107	136.44	45.5358	23.637	1	4730
108	135.261	51.2501	22.0077	1	4787
109	134.783	52.2037	22.0058	1	4845
110	134.995	51.8157	22.2589	1	4902
112	124.173	61.5808	25.5	1	5030
113	122.648	62.9168	25.5	1	5088
114	122.967	62.3379	25.5	1	5150
115	124.374	62.1032	25.5	1	5208
116	124.766	61.3769	25.5	1	5266
1	247.889	228.583	10.6169	2	1
2	246.853	227.432	10.9651	2	38
3	245.787	225.842	11.3219	2	75
4	236.09	221.705	14.6555	2	114
5	237.106	222.61	15.4802	2	175
6	235.198	222.568	16.4213	2	212
7	232.621	221.856	17.4139	2	251
8	231.758	220.842	17.4884	2	289
9	229.693	219.5	17.6924	2	327
10	229.374	219.12	17.4877	2	367
11	229.79	218.761	17.6613	2	406
12	229.201	218.147	17.5283	2	443
13	228.517	217.523	17.7071	2	483
14	228.615	217.799	17.2889	2	524
15	229.398	217.772	17.0061	2	568
16	229.571	216.655	16.7955	2	609
17	229.602	214.77	16.4016	2	649
18	228.551	213.847	16.3665	2	692
19	227.89	213.314	16.2837	2	734
20	226.391	213.641	16.8203	2	776
21	228.31	212.241	16.2061	2	818
22	229.825	211.415	16.186	2	862
23	229.255	211.112	16.1569	2	904
24	229.337	209.836	15.971	2	946
25	228.757	208.998	16.2913	2	988
26	228.174	208.044	16.2899	2	1029
27	228.626	207.156	16.2952	2	1071
28	228.782	205.681	16.1962	2	1112
29	229.683	204.472	15.9432	2	1154
30	230.105	204.119	16.0309	2	1195
31	230.149	203.048	16.0676	2	1235
32	229.99	202.335	16.3341	2	1277
33	229.675	200.465	16.1777	2	1317
34	229.948	200.441	16.6249	2	1356
35	231.058	199.124	16.2313	2	1398
36	231.586	198.531	16.2773	2	1442
37	232.202	198.563	16.2531	2	1484
38	231.986	195.495	17.0378	2	1529
39	229.099	200.22	18.7412	2	1571
40	231.013	198.739	17.7435	2	1614
41	230.725	197.755	17.821	2	1657
42	231.203	197.791	18.0011	2	1698
43	232.315	196.622	18.3184	2	1743
44	232.624	195.14	18.7328	2	1787
45	233.389	196.697	18.1999	2	1832
46	232.598	198.189	18.5895	2	1873
47	232.456	198.878	18.9317	2	1919
48	232.361	197.3	19.2727	2	1966
49	231.928	197.716	19.4618	2	2013
50	232.34	197.039	19.8859	2	2056
51	233.315	196.612	20.2971	2	2097
52	233.84	198.802	20.4915	2	2140
53	233.456	198.423	20.9712	2	2182
54	230.898	204.081	23.4041	2	2226
55	231.523	202.892	21.8779	2	2272
56	231.709	202.575	21.8008	2	2314
57	233.016	199.278	20.6679	2	2360
58	233.354	199.531	20.8863	2	2406
59	234.202	200.489	20.7663	2	2451
60	233.581	198.637	21.1146	2	2494
61	232.325	201.968	22.0798	2	2538
62	231.296	204.543	25.5	2	2599
63	230.587	203.068	24.5905	2	2624
64	230.053	202.229	24.326	2	2665
65	232.64	201.492	25.5	2	2724
66	230.739	201.876	24.9704	2	2751
67	230.848	203.129	24.4856	2	2792
68	231.89	201.848	25.5	2	2849
69	231.61	202.846	25.5	2	2891
70	231.526	200.714	25.5	2	2932
71	231.696	198.129	25.5	2	2975
72	231.416	198.072	25.5	2	3021
73	232.332	198.272	25.5	2	3062
74	233.343	199.187	25.5	2	3105
75	233.335	199.99	25.5	2	3148
76	233.568	199.034	25.5	2	3189
77	232.683	198.343	25.5	2	3230
78	232.256	197.585	25.5	2	3273
79	231.355	197.515	25.5	2	3316
80	232.839	198.494	25.5	2	3360
81	233.576	198.814	25.5	2	3404
82	233.837	200.222	25.5	2	3448
83	233.827	199.614	25.5	2	3495
84	232.762	198.739	25.5	2	3543
85	232.43	196.796	25.5	2	3591
86	234.614	197.499	25.5	2	3637
87	234.57	197.055	25.5	2	3683
88	234.78	196.955	25.5	2	3730
89	235.416	196.715	25.5	2	3780
90	233.906	197.407	25.5	2	3831
91	232.35	197.308	25.5	2	3880
92	231.457	198.106	25.5	2	3932
93	233.476	196.696	25.5	2	3983
94	234.959	196.875	25.5	2	4035
95	233.338	198.215	25.5	2	4089
96	235.435	197.918	25.5	2	4141
97	233.407	197.157	25.5	2	4196
98	231.182	197.791	25.5	2	4250
99	233.832	197.221	25.5	2	4303
100	232.142	197.833	25.5	2	4358
101	234.626	197.997	25.5	2	4413
102	234.718	198.217	25.5	2	4470
103	235.099	198.65	25.5	2	4525
104	232.838	197.96	25.5	2	4581
105	231.454	197.434	25.5	2	4639
106	232.992	196.739	25.5	2	4694
107	232.207	197.352	25.5	2	4753
108	233.369	196.791	25.5	2	4810
109	234.467	195.712	25.5	2	4867
110	232.815	194.842	25.5	2	4924
111	232.495	194.824	25.5	2	4979
112	231.215	194.828	25.5	2	5036
113	232.328	195.529	25.5	2	5094
114	234.752	194.597	25.5	2	5156
115	233.939	194.961	25.5	2	5214
116	234.954	193.672	25.5	2	5272
117	233.648	195.076	25.5	2	5325
118	231.933	196.103	25.5	2	5380
119	231.143	194.672	25.5	2	5434
120	234.548	194.09	25.5	2	5486
121	233.286	194.98	25.5	2	5541
122	234.657	193.665	25.5	2	5593
123	235.514	194.739	25.5	2	5646
124	231.839	194.896	25.5	2	5699
125	232.484	194.784	25.5	2	5754
126	232.231	195.065	25.5	2	5808
127	233.006	196.98	25.5	2	5865
128	236.243	194.175	25.5	2	5921
129	237.402	194.392	25.5	2	5976
130	235.843	193.739	25.5	2	6031
131	237.508	193.292	25.5	2	6084
132	234.955	194.013	25.5	2	6140
133	235.101	193.583	25.5	2	6190
134	237.407	193.356	25.5	2	6244
135	237.574	193.579	25.5	2	6295
136	240.178	192.393	25.5	2	6345
137	239.401	191.711	25.5	2	6396
138	238.686	192.188	25.5	2	6447
139	236.046	196.238	25.5	2	6500
140	234.753	197.708	25.5	2	6551
141	236.486	195.251	25.5	2	6604
142	238.41	194.776	25.5	2	6656
143	238.423	195.632	25.5	2	6709
144	236.668	197.726	25.5	2	6761
145	233.75	199.543	25.5	2	6810
146	234.421	194.508	25.5	2	6861
147	236.823	194.045	25.5	2	6913
148	237.66	194.712	25.5	2	6964
149	237.384	194.036	25.5	2	7017
150	232.758	196.027	25.5	2	7070
151	233.989	195.978	25.5	2	7122
152	232.216	196.523	25.5	2	7174
153	232.241	196.394	25.5	2	7226
154	233.678	195.481	25.5	2	7279
155	235.488	195.039	25.5	2	7330
156	234.668	195.453	25.5	2	7383
157	231.905	196.296	25.5	2	7432
1	308.228	162.497	5.5	3	2
2	308.44	163.062	5.5	3	39
3	308.442	161.901	5.5	3	77
4	308.397	160.999	5.5	3	115
5	308.498	162.832	7.16143	3	154
6	308.891	163.332	6.92045	3	192
7	309.271	163.394	7.36963	3	231
8	309.336	163.968	5.5	3	268
9	309.484	164.247	7.36096	3	306
10	309.619	164.583	7.42288	3	345
11	309.674	164.707	7.86552	3	384
12	309.78	164.651	9.14813	3	423
13	309.506	164.11	8.61919	3	462
14	309.66	164.363	6.94704	3	503
15	310.216	164.431	5.5	3	544
16	310.056	165.382	5.5	3	586
17	310.057	165.573	8.29438	3	629
18	310.033	164.749	7.90972	3	672
19	309.6	163.303	8.13278	3	714
20	309.503	163.99	9.52713	3	756
21	309.567	164.224	9.30488	3	799
22	310.255	165.546	9.60246	3	842
23	310.127	164.902	10.1027	3	884
24	310.238	165.012	11.0888	3	926
25	310.408	164.719	11.4139	3	967
26	310.447	164.795	11.5556	3	1008
27	311.187	166.006	11.9891	3	1050
28	310.719	165.416	12.1616	3	1091
29	310.352	164.121	12.3757	3	1133
30	311.034	165.015	12.6337	3	1174
31	310.126	164.173	13.1373	3	1215
32	309.916	164.186	13.172	3	1256
33	310.028	164.241	13.3837	3	1297
34	309.961	164.031	13.8698	3	1338
35	311.075	165.707	14.0147	3	1380
36	311.132	165.802	13.9944	3	1423
37	312.079	167.116	14.6371	3	1489
38	313.014	167.944	14.8684	3	1533
39	311.073	166.156	14.7154	3	1576
40	312.956	168.343	15.4273	3	1618
41	310.219	164.533	15.2268	3	1660
42	311.953	168.042	15.3966	3	1701
43	313.036	169.204	15.7629	3	1746
44	312.474	168.506	15.4946	3	1790
45	312.145	167.699	15.5036	3	1835
46	313.263	169.604	16.0518	3	1876
47	313.167	169.706	16.5719	3	1922
1	328.716	181.958	6.02608	4	3
2	324.593	177.635	7.21362	4	41
3	324.901	178.057	7.4115	4	79
4	324.709	178.229	7.71744	4	117
5	325.91	177.843	8.26864	4	155
6	325.96	177.323	9.43597	4	194
7	325.502	177.916	9.81358	4	232
8	327.2	177.167	9.85298	4	270
9	326.635	177.162	10.3665	4	308
10	325.801	177.655	10.6674	4	347
11	324.609	179.111	10.5992	4	386
12	324.836	178.734	10.607	4	425
13	326.092	177.574	10.5913	4	464
14	326.635	175.927	10.8733	4	505
15	326.155	176.937	10.4373	4	546
16	326.081	175.425	10.9455	4	588
17	325.845	173.494	11.5369	4	631
18	326.124	174.256	11.696	4	674
19	325.882	173.485	11.6382	4	716
20	325.637	174.043	11.9919	4	759
21	325.678	173.887	12.0794	4	802
22	326.166	172.56	12.4342	4	845
23	326.282	172.771	12.7065	4	887
24	326.027	171.303	12.9941	4	929
25	325.409	170.906	13.3304	4	969
26	325.682	171.237	13.1898	4	1010
27	325.84	171.131	13.3881	4	1051
28	326.191	171.272	13.5646	4	1092
29	326.23	170.853	13.6992	4	1134
30	326.234	170.486	13.8089	4	1175
31	326.569	170.383	14.0426	4	1216
32	326.583	170.553	13.9783	4	1257
33	325.794	170.02	14.3458	4	1322
34	326.249	170.067	14.7042	4	1361
35	325.991	169.802	14.7328	4	1403
36	326.118	169.832	14.9302	4	1447
37	326.374	169.825	15.0336	4	1490
38	326.538	169.996	15.1319	4	1534
39	326.698	170.318	15.5034	4	1577
40	326.768	170.689	15.7107	4	1619
41	326.894	171.233	15.8856	4	1661
42	327.196	171.416	16.066	4	1702
43	327.399	171.577	16.1892	4	1747
44	327.619	171.669	16.2535	4	1791
45	327.835	171.762	16.2194	4	1836
46	327.796	171.99	16.62	4	1877
47	327.416	172.011	16.9899	4	1928
48	321.041	171.464	17.0797	4	1972
49	313.353	169.544	16.6871	4	2015
1	350.033	195.016	5.5	5	4
2	332.143	191.636	5.5	5	40
3	332.512	193	5.5	5	78
4	332.887	192.605	5.5	5	116
5	333.078	192.937	5.5	5	153
6	332.553	191.884	5.5	5	191
7	332.692	192.808	5.5	5	230
8	333.282	193.082	6.80527	5	269
9	333.073	192.23	7.42381	5	307
10	332.832	191.951	7.82827	5	346
11	332.956	191.36	7.2904	5	385
12	332.991	191.135	7.66199	5	424
13	332.398	190.413	7.26552	5	463
14	332.089	190.337	8.16406	5	504
15	332.102	190.707	6.82548	5	545
16	331.312	191.624	7.40771	5	587
17	330.892	191.733	8.65781	5	630
18	330.202	190.283	8.17094	5	673
19	330.74	191.399	8.58257	5	715
20	331.056	191.835	10.1364	5	757
21	331.309	191.73	10.4741	5	800
22	331.135	191.53	10.9624	5	843
23	331.192	191.97	11.7256	5	885
24	330.781	191.996	11.6913	5	927
25	331.603	192.782	12.6756	5	970
26	331.482	193.496	13.2728	5	1011
27	332.272	193.445	13.5791	5	1052
28	331.792	193.476	13.7888	5	1093
29	332.265	192.872	13.6926	5	1135
30	332.812	192.697	14.0723	5	1176
31	332.624	192.479	14.0515	5	1217
32	332.104	192.502	13.8472	5	1258
34	332.338	193.562	14.6009	5	1362
35	331.575	193.641	14.6394	5	1404
36	331.364	193.47	14.8616	5	1448
37	331.241	192.87	14.7955	5	1491
38	329.589	189.11	14.4335	5	1510
39	329.256	188.498	14.3038	5	1553
40	325.543	191.856	14.7571	5	1596
41	326.032	189.771	14.9431	5	1662
42	331.987	194.86	15.7816	5	1704
43	332.939	194.599	16.2394	5	1749
44	333.962	194.984	16.2965	5	1793
45	334.953	194.931	16.0794	5	1838
46	334.934	195.24	16.5284	5	1879
47	334.896	195.41	16.6778	5	1924
48	333.732	196.647	17.1371	5	1973
1	443.593	90.391	10.4736	6	5
2	444.112	90.5165	10.6542	6	42
3	443.976	90.83	10.8892	6	80
4	444.293	90.7434	10.873	6	118
5	444.505	90.7908	11.2159	6	156
6	444.449	91.126	11.3726	6	193
7	445.06	91.4216	11.8597	6	234
8	445.524	91.6315	12.1256	6	272
9	445.922	91.7749	12.2394	6	310
10	445.954	91.9306	12.5161	6	350
11	446.284	92.3311	12.4807	6	388
12	446.415	92.3952	12.6007	6	427
13	446.26	92.5425	12.5307	6	466
14	445.995	92.8296	12.461	6	507
15	446.184	92.9863	11.9881	6	549
16	446.126	92.9296	12.4301	6	591
17	445.967	92.9032	12.6516	6	633
18	445.953	93.0452	12.8138	6	676
19	445.921	92.844	12.7918	6	718
20	445.856	92.8062	12.8969	6	758
21	445.904	92.5313	12.878	6	801
22	445.47	92.3235	13.0286	6	844
23	445.592	91.9895	13.213	6	886
24	445.461	91.8999	13.3462	6	928
25	445.609	91.7331	13.423	6	968
26	445.759	91.6412	13.5557	6	1009
27	445.704	91.4114	13.8342	6	1049
28	445.522	91.4993	14.071	6	1090
29	445.717	91.4455	14.0983	6	1132
30	445.962	91.4616	14.3369	6	1199
31	445.988	91.4997	14.4677	6	1239
32	446.304	91.527	14.533	6	1281
33	446.433	91.6363	14.7718	6	1321
34	446.566	91.6767	15.0394	6	1360
35	446.358	91.7237	15.022	6	1402
36	446.39	91.7688	15.2399	6	1446
37	446.645	91.9548	15.5141	6	1488
38	446.747	92.0698	15.5947	6	1532
39	446.775	92.3341	15.8065	6	1575
40	447.209	92.6711	16.1447	6	1617
41	447.332	92.8163	16.0694	6	1659
42	447.129	93.0311	16.1414	6	1700
43	447.288	93.3348	16.4336	6	1745
44	447.451	93.4398	16.4225	6	1789
45	447.752	93.7307	16.3354	6	1834
46	448.12	93.8827	16.8143	6	1882
47	448.127	94.0126	17.0769	6	1927
48	448.353	94.3563	17.2116	6	1971
49	448.646	94.5097	17.2641	6	2018
50	448.45	94.9641	17.6065	6	2061
51	448.326	95.0062	17.7477	6	2100
52	448.553	95.1842	17.7486	6	2144
53	448.923	94.9857	17.9242	6	2185
54	448.928	95.4906	17.9225	6	2229
55	448.943	95.5162	17.8811	6	2275
56	448.947	95.4561	18.0608	6	2317
57	449.174	95.2758	18.0088	6	2363
58	449.171	95.2037	18.1358	6	2408
59	449.069	95.081	18.0766	6	2453
60	449.254	95.2645	18.0792	6	2496
61	449.165	95.3308	18.2109	6	2539
62	449.167	95.2465	18.2635	6	2583
63	449.05	95.2863	18.4913	6	2626
64	449.033	95.1655	18.2211	6	2667
65	449.155	94.8721	18.2855	6	2709
66	449.137	94.6056	18.4249	6	2752
67	449.138	94.8354	18.6065	6	2793
68	449.069	94.8481	18.4478	6	2832
69	449.187	94.864	18.5809	6	2873
70	449.062	94.7605	18.815	6	2915
71	449.069	94.8473	18.8661	6	2958
72	449.183	94.8322	18.8613	6	3002
73	449.273	94.752	19.0313	6	3045
74	449.436	94.7443	19.1722	6	3087
75	449.353	94.7894	19.1204	6	3130
76	449.282	94.761	18.9065	6	3172
77	449.368	94.6097	19.4438	6	3213
78	449.32	94.6104	19.4006	6	3256
79	449.528	94.804	19.799	6	3296
80	449.686	94.8554	19.7633	6	3340
81	449.897	94.9754	20.0266	6	3385
82	450.039	95.1218	20.4189	6	3430
83	450.237	95.529	20.8873	6	3473
84	450.27	95.6837	21.2218	6	3521
85	450.275	95.8612	21.5729	6	3569
86	450.752	96.2323	22.3306	6	3616
87	450.655	96.3666	22.7999	6	3660
88	450.836	96.4618	23.2848	6	3709
89	451.048	96.5478	23.6377	6	3758
90	451.351	96.771	23.9085	6	3807
91	451.641	97.0191	25.5	6	3893
92	451.638	97.1756	25.5	6	3945
93	451.826	97.0723	25.5	6	3998
94	451.71	97.1307	25.5	6	4050
95	451.985	97.3595	25.5	6	4104
96	451.903	97.258	25.5	6	4156
97	451.822	97.0027	25.5	6	4211
98	451.981	96.9693	25.5	6	4265
99	451.81	96.5079	25.5	6	4318
100	451.888	96.6261	25.5	6	4374
101	451.858	96.7567	25.5	6	4429
102	451.922	96.7153	25.5	6	4486
103	452.021	96.6934	25.5	6	4541
104	452.083	96.8901	25.5	6	4597
105	452.015	96.7717	25.5	6	4655
106	451.801	96.546	25.5	6	4710
107	451.979	96.3512	25.5	6	4769
108	451.833	96.4126	25.5	6	4826
109	451.964	96.4001	25.5	6	4882
110	452.284	96.2139	25.5	6	4939
111	452.376	96.0726	25.5	6	4993
112	452.449	95.9853	25.5	6	5051
113	452.116	95.4154	25.5	6	5110
114	452.155	95.3839	25.5	6	5171
115	452.396	94.9117	25.5	6	5230
116	452.741	94.4879	25.5	6	5286
117	452.962	94.5012	25.5	6	5339
118	453.051	94.4233	25.5	6	5394
119	453.078	94.5552	25.5	6	5448
120	452.885	93.7814	25.5	6	5500
121	452.896	93.7291	25.5	6	5554
122	452.998	93.4842	25.5	6	5605
123	453.168	93.8673	25.5	6	5659
124	453.392	93.94	25.5	6	5712
125	453.766	93.6536	25.5	6	5767
126	453.898	94.1433	25.5	6	5823
127	453.973	93.8834	25.5	6	5880
128	453.856	94.0895	25.5	6	5936
129	453.909	94.9942	25.5	6	5991
130	454.1	95.7825	25.5	6	6046
131	454.27	95.2469	25.5	6	6099
132	454.55	95.3381	25.5	6	6154
133	454.671	95.5077	25.5	6	6205
134	454.379	96.1455	25.5	6	6259
135	454.727	95.4391	25.5	6	6309
136	455.105	94.8055	25.5	6	6360
137	455.322	95.0748	25.5	6	6410
138	455.282	95.5527	25.5	6	6462
139	454.861	95.6157	25.5	6	6515
140	454.594	95.9342	25.5	6	6565
141	454.754	96.4088	25.5	6	6619
142	454.353	96.153	25.5	6	6671
143	454.529	95.7733	25.5	6	6724
144	454.906	94.6857	25.5	6	6776
145	454.941	94.9921	25.5	6	6825
146	455.514	94.0424	25.5	6	6876
147	454.839	93.3364	25.5	6	6928
148	454.797	93.5267	25.5	6	6979
149	454.755	93.5147	25.5	6	7032
150	455.239	94.0675	25.5	6	7085
151	455.08	93.8011	25.5	6	7137
152	454.907	94.4477	25.5	6	7189
153	455.265	93.8723	25.5	6	7241
154	454.615	93.362	25.5	6	7293
155	455.268	92.5398	25.5	6	7344
156	454.398	93.8753	25.5	6	7397
157	454.392	95.9383	25.5	6	7446
158	454.585	95.7565	25.5	6	7494
159	454.727	95.7346	25.5	6	7544
160	454.528	94.5571	25.5	6	7594
161	454.415	94.7317	25.5	6	7640
162	454.75	94.3751	25.5	6	7685
163	454.702	94.3001	25.5	6	7732
164	454.972	94.2314	25.5	6	7779
165	455.962	92.8133	25.5	6	7827
166	455.66	93.749	25.5	6	7872
167	455.162	93.8417	25.5	6	7914
168	455.213	94.302	25.5	6	7958
169	455.406	94.9848	25.5	6	8000
170	455.717	95.1549	25.5	6	8041
171	456.421	95.1233	25.5	6	8083
172	456.636	95.3948	25.5	6	8126
173	455.94	96.3715	25.5	6	8167
174	455.883	96.9855	25.5	6	8208
175	455.851	97.1811	25.5	6	8249
176	456.229	97.4815	25.5	6	8289
1	437.032	118.112	11.2931	7	6
2	438.193	119.713	11.3004	7	43
3	438.758	120.522	11.4514	7	81
4	437.935	120.38	11.6564	7	119
5	438.005	120.768	11.9197	7	159
6	438.477	121.528	12.3628	7	197
7	437.849	125.118	13.0715	7	235
8	438.375	125.803	13.5736	7	273
9	438.152	126.233	13.8832	7	311
10	438.383	126.283	14.2506	7	371
11	438.4	126.163	14.0487	7	390
12	438.631	126.184	14.3835	7	447
13	438.362	126.713	15.0956	7	489
14	437.875	126.73	15.2121	7	531
15	437.412	126.242	14.5544	7	572
16	437.327	125.777	15.0478	7	614
17	437.604	126.002	15.2642	7	657
18	437.462	126.427	15.2619	7	699
19	437.422	125.961	15.3742	7	740
20	437.014	126.091	15.4211	7	782
21	437.216	126.326	15.6488	7	825
22	437.222	126.107	16.3963	7	869
23	437.361	125.901	16.7325	7	911
24	437.138	126.172	16.8134	7	953
25	436.997	125.278	16.5855	7	995
26	437.298	126.007	16.9519	7	1037
27	436.959	125.514	17.5908	7	1078
28	436.749	125.078	18.3809	7	1119
29	436.523	124.709	17.7052	7	1161
30	436.621	124.636	17.2667	7	1203
31	436.96	125.204	17.8997	7	1244
32	437.15	125.525	18.4051	7	1285
33	437.007	125.173	18.7081	7	1326
34	437.105	125.082	18.9982	7	1366
35	436.668	125.03	18.5347	7	1407
36	436.566	124.993	18.788	7	1451
37	436.602	126.086	19.2613	7	1496
38	436.765	126.204	19.6962	7	1540
39	436.678	126.292	20.6995	7	1582
40	437.046	126.386	20.7764	7	1623
41	437.159	126.352	20.9198	7	1666
42	437.233	126.644	20.9959	7	1708
43	437.309	127.151	22.7457	7	1753
44	437.345	127.417	21.8613	7	1797
45	437.438	126.647	21.1068	7	1842
46	437.357	127.179	22.2377	7	1884
47	437.885	127.86	22.7051	7	1930
48	438.305	127.732	23.2399	7	1976
49	438.555	127.887	22.6019	7	2021
50	438.915	128.568	23.7179	7	2064
51	438.669	129.185	25.5	7	2123
52	438.941	128.227	22.5612	7	2148
53	439.155	128.402	22.337	7	2191
54	439.108	129.078	23.0477	7	2235
55	439.299	129.129	22.7358	7	2281
56	439.477	129.147	23.7952	7	2323
57	439.053	129.13	23.9374	7	2369
58	439.141	129.166	23.8635	7	2414
59	439.153	128.802	24.119	7	2458
60	439.02	128.877	22.4862	7	2502
61	439.151	128.908	23.4883	7	2546
62	439.414	129.049	22.2124	7	2589
63	439.187	129.15	22.632	7	2632
64	438.828	130.444	25.5	7	2689
65	438.821	130.33	25.5	7	2732
66	438.271	129.887	25.5	7	2775
67	438.704	129.637	25.5	7	2815
68	438.227	129.515	25.5	7	2856
69	438.456	129.421	25.5	7	2897
70	438.676	129.649	25.5	7	2940
71	438.862	130.173	25.5	7	2983
72	438.259	129.862	25.5	7	3029
73	438.377	130.031	25.5	7	3071
74	438.611	130.262	25.5	7	3114
75	438.649	129.897	25.5	7	3156
76	439.23	130.237	25.5	7	3198
77	439.403	130.361	25.5	7	3240
78	438.42	130.086	25.5	7	3283
79	438.719	130.197	25.5	7	3327
80	438.587	130.212	25.5	7	3371
81	439.078	130.695	25.5	7	3416
82	439.448	131.046	25.5	7	3460
83	439.738	130.8	25.5	7	3507
84	439.963	131.126	25.5	7	3555
85	439.64	131.384	25.5	7	3604
86	440.234	131.375	25.5	7	3650
87	439.684	131.452	25.5	7	3699
88	439.924	131.533	25.5	7	3746
89	440.649	131.872	25.5	7	3796
90	440.899	132.105	25.5	7	3847
91	441.146	132.229	25.5	7	3897
92	440.414	131.803	25.5	7	3949
93	441.363	132.206	25.5	7	4002
94	441.211	132.388	25.5	7	4054
95	441.888	132.685	25.5	7	4108
96	441.651	132.31	25.5	7	4160
97	441.496	132.27	25.5	7	4214
98	441.351	132.094	25.5	7	4268
99	441.108	131.964	25.5	7	4321
100	440.73	131.813	25.5	7	4377
101	441.183	132.134	25.5	7	4432
102	441.199	132.15	25.5	7	4489
103	441.445	131.986	25.5	7	4544
104	441.612	132.13	25.5	7	4600
105	441.763	132.325	25.5	7	4658
106	440.654	131.511	25.5	7	4713
107	440.908	131.772	25.5	7	4772
108	440.803	131.57	25.5	7	4829
109	441.003	131.561	25.5	7	4885
110	441.452	131.735	25.5	7	4942
111	441.729	132.048	25.5	7	4996
112	441.324	131.593	25.5	7	5054
113	440.354	130.938	25.5	7	5113
114	440.601	131.024	25.5	7	5174
115	440.541	131.222	25.5	7	5233
116	440.734	131.157	25.5	7	5289
117	441.073	131.855	25.5	7	5342
118	441.541	132.696	25.5	7	5396
119	441.436	132.532	25.5	7	5451
120	440.617	131.831	25.5	7	5503
121	440.268	130.742	25.5	7	5557
122	440.473	130.816	25.5	7	5608
123	440.963	131.318	25.5	7	5662
124	441.626	132.378	25.5	7	5716
125	442.142	133.072	25.5	7	5770
126	441.683	132.773	25.5	7	5826
127	441.155	132.481	25.5	7	5883
128	441.532	132.643	25.5	7	5938
129	442.122	133.03	25.5	7	5994
130	442.449	133.391	25.5	7	6049
131	442.488	133.378	25.5	7	6101
132	442.383	133.172	25.5	7	6156
133	442.103	133.347	25.5	7	6207
134	442.314	133.59	25.5	7	6262
135	442.226	133.598	25.5	7	6312
136	442.582	134.002	25.5	7	6363
137	443.353	134.596	25.5	7	6412
138	443.214	134.676	25.5	7	6465
139	442.43	133.986	25.5	7	6518
140	442.374	134.083	25.5	7	6568
141	443.254	134.629	25.5	7	6622
142	442.495	134.068	25.5	7	6674
143	442.714	134.053	25.5	7	6727
144	442.847	133.947	25.5	7	6779
145	443.11	134.232	25.5	7	6828
146	442.521	133.544	25.5	7	6879
147	442.501	132.787	25.5	7	6931
148	442.721	132.96	25.5	7	6982
149	442.883	132.662	25.5	7	7034
150	443.355	132.549	25.5	7	7087
151	443.46	133.022	25.5	7	7139
152	443.641	133.291	25.5	7	7191
153	442.998	132.406	25.5	7	7243
154	443.159	132.959	25.5	7	7295
155	444.018	133.118	25.5	7	7347
156	443.821	133.167	25.5	7	7400
157	443.98	133.583	25.5	7	7449
158	444.358	133.722	25.5	7	7497
159	443.792	133.185	25.5	7	7547
160	443.467	132.814	25.5	7	7597
161	443.578	133.271	25.5	7	7643
162	444.129	133.393	25.5	7	7688
163	443.866	133.553	25.5	7	7735
164	443.86	133.487	25.5	7	7782
165	443.535	133.215	25.5	7	7830
166	443.566	133.264	25.5	7	7875
167	443.255	133.503	25.5	7	7917
168	443.201	132.999	25.5	7	7961
169	443.783	133.25	25.5	7	8003
170	444.288	133.667	25.5	7	8044
171	445.159	134.592	25.5	7	8086
172	445.503	134.957	25.5	7	8129
173	444.438	135.032	25.5	7	8170
174	444.364	134.356	25.5	7	8211
175	444.494	134.788	25.5	7	8252
176	445.278	135.323	25.5	7	8292
1	423.522	27.6879	12.964	8	7
2	421.153	31.8223	15.7452	8	44
3	423.8	28.4545	13.8728	8	82
4	424.869	29.6891	13.5383	8	120
5	425.117	29.6068	13.4766	8	157
6	425.183	30.1352	13.5705	8	195
7	425.262	30.4553	13.878	8	233
8	425.509	30.9529	13.8779	8	271
9	426.403	31.149	14.262	8	330
10	427.341	31.4136	14.1257	8	348
11	427.421	31.4542	13.9005	8	387
12	428.536	32.6723	13.8421	8	426
13	430.348	33.7887	13.7111	8	465
14	432.79	34.3327	13.5049	8	506
15	429.779	32.5087	13.2715	8	548
16	428.823	31.705	13.5017	8	589
17	429.102	32.0013	13.9293	8	632
18	428.67	31.9696	14.5891	8	695
19	428.709	32.1842	14.5547	8	737
20	428.555	32.0754	14.4951	8	780
21	428.817	32.1406	14.5365	8	823
22	428.703	32.1891	15.0215	8	867
23	429.54	32.335	15.2009	8	909
24	425.382	34.6333	19.5558	8	951
25	430.36	32.7487	15.8101	8	993
26	429.593	32.1646	15.6452	8	1034
27	423.419	34.8609	18.9149	8	1075
28	428.247	31.1878	15.9732	8	1116
29	427.543	30.6268	16.3475	8	1158
30	428.961	30.8436	16.9652	8	1201
31	428.59	31.2381	17.001	8	1242
32	429.021	30.4973	17.1202	8	1283
33	428.556	30.7553	17.0341	8	1324
34	429.345	30.2429	16.8047	8	1364
35	429.338	31.0295	17.2752	8	1405
36	430.195	30.981	17.8071	8	1449
37	430.42	31.417	17.9983	8	1493
38	426.98	34.6631	21.9404	8	1537
39	431.498	31.7877	18.4941	8	1580
40	432.725	32.7226	18.7152	8	1621
41	431.562	31.3952	18.4667	8	1664
42	429.361	31.1628	18.3057	8	1706
43	431.42	32.1702	18.502	8	1751
44	431.86	32.4519	18.3943	8	1795
45	431.782	32.3902	18.3799	8	1840
46	432.385	32.8065	18.8463	8	1881
47	432.009	32.829	18.8904	8	1926
48	433.572	32.671	19.3108	8	1974
49	432.039	32.9856	19.3308	8	2019
50	426.762	35.5639	22.6582	8	2062
51	431.663	33.6757	20.0171	8	2103
52	432.154	33.821	19.9123	8	2146
53	433.694	33.6924	19.9681	8	2188
54	435.319	34.5669	20.1971	8	2233
55	436.432	34.9866	20.3401	8	2278
56	435.229	35.0433	20.169	8	2320
57	435.467	35.2297	20.3857	8	2366
58	435.143	35.2635	20.6575	8	2411
59	431.943	34.1605	20.2044	8	2456
60	433.136	34.3994	20.1127	8	2499
61	433.354	34.2312	20.3078	8	2543
62	434.164	34.3065	20.7862	8	2586
63	435.723	35.0404	20.6185	8	2629
64	435.55	35.6211	20.5569	8	2670
65	434.768	34.7348	20.8964	8	2712
66	434.379	34.1158	21.1367	8	2756
67	435.542	34.6456	21.4087	8	2797
68	435.102	34.4374	21.1837	8	2837
69	436.019	34.6422	21.3155	8	2876
70	435.97	34.9507	21.5501	8	2917
71	435.568	34.3085	21.7089	8	2960
72	433.792	33.6236	21.142	8	3006
73	432.514	33.1367	21.2341	8	3046
74	431.965	33.0769	21.4705	8	3088
75	433.071	33.1431	21.3117	8	3131
76	432.821	33.0546	20.9418	8	3173
77	435.183	34.0927	22.1207	8	3217
78	435.237	33.6841	22.2793	8	3260
79	435.33	33.7641	22.8905	8	3299
80	435.409	33.9301	22.8305	8	3343
81	435.696	34.5102	22.5522	8	3387
82	433.605	33.7012	22.6263	8	3432
83	435.149	34.175	23.8012	8	3474
84	436.377	34.7763	25.5	8	3550
85	437.209	36.0643	25.5	8	3598
86	437.451	36.554	25.5	8	3644
87	437.456	36.3695	25.5	8	3692
88	437.779	36.4915	25.5	8	3739
89	437.446	36.4101	25.5	8	3789
90	437.592	36.5748	25.5	8	3840
91	438.321	37.2285	25.5	8	3889
92	438.592	37.415	25.5	8	3941
93	437.072	36.4681	25.5	8	3994
94	436.588	35.4831	25.5	8	4046
95	435.807	35.0647	25.5	8	4100
96	436.072	35.3552	25.5	8	4152
97	436.359	35.8133	25.5	8	4207
98	437.25	36.2644	25.5	8	4261
99	438.341	36.8476	25.5	8	4314
100	439.11	37.4222	25.5	8	4370
101	438.99	37.3066	25.5	8	4425
102	439.233	37.2886	25.5	8	4482
103	439.562	37.4683	25.5	8	4537
104	439.654	38.3371	25.5	8	4593
105	440.029	38.0557	25.5	8	4651
106	440.394	38.3389	25.5	8	4706
107	440.492	38.3332	25.5	8	4765
108	440.395	38.5823	25.5	8	4822
109	439.266	38.1001	25.5	8	4878
110	439.624	38.5031	25.5	8	4935
111	440.135	38.4487	25.5	8	4989
112	440.133	38.1405	25.5	8	5047
113	439.652	37.9869	25.5	8	5106
114	439.223	37.0544	25.5	8	5167
115	439.269	37.3047	25.5	8	5226
116	438.354	36.8222	25.5	8	5282
117	437.286	35.8979	25.5	8	5335
118	436.756	35.7106	25.5	8	5390
119	438.188	36.5443	25.5	8	5444
120	438.327	37.1237	25.5	8	5496
121	439.411	37.9892	25.5	8	5551
122	438.982	37.5056	25.5	8	5602
123	439.05	37.0679	25.5	8	5655
124	439.511	38.0082	25.5	8	5708
125	439.896	38.8066	25.5	8	5763
126	440.338	38.1797	25.5	8	5818
127	440.979	38.4585	25.5	8	5875
128	439.665	37.9714	25.5	8	5931
129	438.579	37.0654	25.5	8	5986
130	438.496	37.0973	25.5	8	6041
131	439.072	37.5092	25.5	8	6094
132	438.853	37.2637	25.5	8	6149
133	438.753	36.8727	25.5	8	6200
134	440.18	39.449	25.5	8	6254
135	442.319	41.2587	25.5	8	6304
136	442.54	41.1202	25.5	8	6354
137	441.754	39.9639	25.5	8	6405
138	440.605	40.0409	25.5	8	6456
139	442.146	41.5613	25.5	8	6509
140	442.413	41.8592	25.5	8	6560
141	442.199	40.9947	25.5	8	6613
142	441.545	40.3645	25.5	8	6665
143	439.483	39.1616	25.5	8	6718
144	439.629	39.5948	25.5	8	6770
145	441.077	40.0937	25.5	8	6819
146	441.319	39.697	25.5	8	6870
147	441.241	39.2197	25.5	8	6922
148	441.308	39.477	25.5	8	6973
149	441.527	39.3011	25.5	8	7026
150	441.317	39.6065	25.5	8	7079
151	441.037	39.5139	25.5	8	7131
152	441.098	39.4399	25.5	8	7183
153	440.12	38.6731	25.5	8	7235
154	438.571	38.4995	25.5	8	7287
155	441.875	41.9125	25.5	8	7338
156	441.481	41.5427	25.5	8	7391
157	440.737	40.5129	25.5	8	7440
158	441.918	41.7744	25.5	8	7488
159	438.474	39.9407	25.5	8	7538
160	438.114	39.1593	25.5	8	7588
161	437.634	38.6643	25.5	8	7634
162	438.27	39.4502	25.5	8	7681
163	437.411	38.6671	25.5	8	7727
164	437.68	38.3341	25.5	8	7774
165	440.701	40.5736	25.5	8	7822
166	441.862	41.1894	25.5	8	7868
167	439.149	39.8561	25.5	8	7911
168	440.634	40.9138	25.5	8	7954
169	442.965	42.1151	25.5	8	7997
170	444.816	43.743	25.5	8	8038
171	444.499	43.304	25.5	8	8080
172	444.255	42.8304	25.5	8	8124
173	443.904	42.9039	25.5	8	8165
174	443.493	42.1208	25.5	8	8206
175	443.379	41.5866	25.5	8	8247
176	443.379	41.5606	25.5	8	8286
1	378.323	36.9219	13.574	9	8
2	379.088	36.6617	13.1419	9	45
3	380.545	37.2501	13.608	9	83
4	380.704	37.1502	13.2538	9	121
5	380.825	36.541	13.1216	9	158
6	382.696	34.7698	13.6142	9	196
7	382.671	35.4053	14.5469	9	255
8	382.512	35.9907	14.6413	9	292
9	381.821	36.0952	14.2252	9	309
10	381.948	36.1558	14.0862	9	349
11	383.233	34.4005	14.3465	9	409
12	383.63	36.1979	14.6676	9	445
13	384.146	35.8506	14.6281	9	486
14	385.483	34.7676	15.185	9	528
15	386.336	34.8322	14.6485	9	570
16	385.509	33.8386	14.1084	9	590
17	385.915	33.9449	14.8724	9	654
18	386.222	33.6897	14.7467	9	696
19	387.2	33.6464	14.5845	9	738
20	387.173	31.8452	14.6122	9	779
21	387.843	31.2818	14.4588	9	822
22	387.68	31.5844	14.6461	9	866
23	387.554	31.4822	14.7952	9	908
24	387.467	30.7173	14.7456	9	950
25	387.787	30.3525	14.998	9	992
26	389.186	30.3883	14.8925	9	1033
27	389.34	29.6058	14.7243	9	1074
28	390.048	29.5875	14.7026	9	1115
29	390.626	29.91	14.3227	9	1157
30	389.453	30.4874	14.2914	9	1198
31	388.14	30.1205	14.3337	9	1238
32	388.677	30.9893	14.9297	9	1280
33	390.632	31.1272	15.1549	9	1320
34	389.376	31.2276	15.3041	9	1359
35	390.297	30.2106	16.1191	9	1401
36	389.598	30.3684	16.3027	9	1445
37	388.165	30.5853	16.5409	9	1487
38	389.219	29.9258	17.2577	9	1536
39	389.427	30.2129	17.4497	9	1579
40	389.507	30.1927	17.945	9	1620
41	389.519	30.0126	18.1221	9	1663
42	390.862	30.0426	18.3226	9	1705
43	391.329	30.309	18.3814	9	1750
44	391.183	30.7257	17.9043	9	1794
45	390.773	31.0185	17.5283	9	1839
46	390.601	31.4344	18.0041	9	1880
47	390.31	31.6209	18.365	9	1925
48	389.771	31.8789	18.7255	9	1970
49	389.923	31.3674	18.8553	9	2017
50	389.992	31.5214	19.1458	9	2060
51	390.474	31.8319	19.5541	9	2102
52	390.53	31.7464	19.3281	9	2145
53	390.297	31.458	19.4526	9	2187
54	390.628	31.9343	19.7144	9	2232
55	390.812	31.9884	19.532	9	2277
56	390.679	32.3216	19.8156	9	2319
57	390.837	32.7844	19.6876	9	2365
58	390.944	32.9516	19.8013	9	2410
59	390.742	32.9957	19.7213	9	2455
60	391.054	33.0747	19.4537	9	2498
61	391.336	33.1176	19.762	9	2542
62	391.01	32.8637	20.4536	9	2585
63	390.294	32.6907	21.0326	9	2628
64	389.938	32.4208	21.061	9	2669
65	391.17	32.7252	21.8679	9	2715
66	391.344	32.8155	21.4463	9	2755
67	391.628	33.1014	21.7204	9	2796
68	391.718	32.8626	21.5669	9	2836
69	392.229	31.9852	21.97	9	2878
70	392.348	32.467	22.4384	9	2919
71	392.848	33.0622	22.099	9	2963
72	392.524	32.9946	21.4778	9	3005
73	393.152	32.79	21.9965	9	3049
74	392.987	32.7109	22.3079	9	3091
75	392.592	32.4349	22.1815	9	3134
76	392.415	32.594	22.2299	9	3177
77	392.348	32.5296	23.3655	9	3216
78	392.261	32.6568	24.0705	9	3259
79	392.546	32.5992	25.5	9	3322
80	392.928	32.9115	25.5	9	3366
81	393.377	33.1963	25.5	9	3410
82	393.423	33.1526	25.5	9	3453
83	393.44	33.218	25.5	9	3500
84	393.747	33.4468	25.5	9	3549
85	393.768	33.7803	25.5	9	3597
86	393.122	33.6446	25.5	9	3643
87	393.216	33.9212	25.5	9	3691
88	393.888	34.0724	25.5	9	3738
89	394.399	33.9643	25.5	9	3788
90	394.871	33.9287	25.5	9	3839
91	395.592	34.0056	25.5	9	3888
92	396.793	33.9073	25.5	9	3940
93	397.309	34.2878	25.5	9	3993
94	397.225	34.4527	25.5	9	4045
95	397.621	34.4631	25.5	9	4099
96	397.787	34.2851	25.5	9	4151
97	397.715	34.2353	25.5	9	4206
98	398.182	34.1012	25.5	9	4260
99	397.655	33.807	25.5	9	4313
100	397.38	33.9151	25.5	9	4369
101	397.169	33.3788	25.5	9	4424
102	397.318	33.3608	25.5	9	4481
103	397.114	33.0239	25.5	9	4536
104	396.852	33.2303	25.5	9	4592
105	397.165	33.2636	25.5	9	4650
106	397.582	33.5545	25.5	9	4705
107	397.876	33.4405	25.5	9	4764
108	397.672	33.1955	25.5	9	4821
109	397.915	32.707	25.5	9	4877
110	398.109	32.4509	25.5	9	4934
111	398.499	32.3899	25.5	9	4988
112	398.62	32.5046	25.5	9	5046
113	398.339	32.5929	25.5	9	5105
114	397.924	32.0887	25.5	9	5166
115	397.691	32.0351	25.5	9	5225
116	397.841	32.0068	25.5	9	5281
117	398.417	31.9172	25.5	9	5334
118	398.672	31.9297	25.5	9	5389
119	398.881	31.7979	25.5	9	5443
120	398.361	31.5466	25.5	9	5495
121	398.605	32.1645	25.5	9	5550
122	398.459	32.124	25.5	9	5601
123	399.062	32.3963	25.5	9	5654
124	398.523	33.1001	25.5	9	5707
125	398.718	33.366	25.5	9	5762
126	398.367	33.4812	25.5	9	5817
127	398.168	33.9019	25.5	9	5874
128	396.319	33.4792	25.5	9	5930
129	396.299	33.8189	25.5	9	5985
130	396.281	34.2074	25.5	9	6040
131	397.389	33.9557	25.5	9	6093
132	399.334	34.4377	25.5	9	6148
133	400.181	34.8828	25.5	9	6199
134	399.594	34.5811	25.5	9	6253
135	400.391	34.9671	25.5	9	6303
136	400.726	35.112	25.5	9	6353
137	400.145	34.65	25.5	9	6404
138	400.924	34.669	25.5	9	6455
139	401.399	35.1119	25.5	9	6508
140	401.325	34.787	25.5	9	6559
141	401.064	34.7772	25.5	9	6612
142	401.312	34.5193	25.5	9	6664
143	402.06	34.0681	25.5	9	6717
144	402.392	34.1396	25.5	9	6769
145	403.031	34.1	25.5	9	6818
146	404.629	33.8865	25.5	9	6869
147	404.608	33.6322	25.5	9	6921
148	404.231	33.2966	25.5	9	6972
149	404.114	33.1933	25.5	9	7025
150	404.154	33.3142	25.5	9	7078
151	403.969	33.3495	25.5	9	7130
152	404.399	33.505	25.5	9	7182
153	404.318	33.5635	25.5	9	7234
154	404.157	33.4845	25.5	9	7286
155	403.662	33.4883	25.5	9	7337
156	403.824	33.44	25.5	9	7390
157	403.814	33.5373	25.5	9	7439
158	404.775	33.5149	25.5	9	7487
159	404.904	33.534	25.5	9	7537
160	404.663	33.6072	25.5	9	7587
161	405.483	33.2027	25.5	9	7633
162	405.149	33.0039	25.5	9	7680
163	405.935	33.0237	25.5	9	7726
164	405.315	33.0123	25.5	9	7773
165	405.528	33.2449	25.5	9	7821
166	405.37	33.3695	25.5	9	7867
167	404.499	33.3373	25.5	9	7910
168	404.126	33.8078	25.5	9	7953
169	403.685	33.7936	25.5	9	7996
170	404.682	34.053	25.5	9	8037
171	405.747	34.5852	25.5	9	8079
172	404.91	34.4997	25.5	9	8122
173	405.008	34.7417	25.5	9	8163
174	404.419	35.1048	25.5	9	8204
175	404.223	35.1704	25.5	9	8245
176	405.158	35.2122	25.5	9	8285
1	384.154	71.4004	13.8554	10	9
2	384.284	71.6292	14.3407	10	67
3	384.045	72.4965	14.7003	10	106
4	385.772	72.1959	14.5908	10	143
5	385.987	72.1653	14.8041	10	180
6	386.111	71.8646	15.1962	10	218
7	385.934	72.5325	15.4744	10	256
8	386.109	72.5737	15.52	10	293
9	386.626	72.7228	16.1012	10	331
10	387.066	72.8458	15.6434	10	370
11	384.815	74.3999	16.6138	10	410
12	386.178	74.1463	17.083	10	449
13	386.379	73.6429	16.5286	10	487
14	385.676	74.1743	16.3558	10	529
15	385.214	73.7661	15.7346	10	571
16	385.547	73.7329	15.979	10	612
17	385.81	73.8404	16.2675	10	655
18	385.573	73.4497	16.573	10	697
19	385.934	73.7691	16.9795	10	742
20	386.274	73.6419	17.4081	10	784
21	386.487	73.8817	17.8965	10	827
1	212.71	279.782	5.5	11	10
2	212.866	280.656	5.5	11	47
3	213.887	279.793	5.5	11	85
4	212.761	280.413	5.5	11	123
5	212.303	279.875	5.5	11	160
6	212.191	280.587	5.5	11	198
7	212.535	280.473	5.5	11	236
8	213.305	280.092	5.5	11	274
9	213.747	280.911	5.5	11	312
10	214.632	280.45	5.5	11	352
11	213.509	281.051	5.5	11	391
12	213.198	281.45	5.5	11	428
13	212.755	281.376	5.5	11	467
14	212.426	281.073	5.5	11	508
15	213.945	281.567	5.5	11	551
16	214.22	280.182	5.5	11	592
17	214.651	279.46	5.5	11	634
18	213.523	280.102	5.5	11	677
19	212.884	280.406	5.5	11	719
20	212.664	280.154	5.5	11	760
21	212.757	280.59	5.5	11	803
22	213.316	280.126	5.5	11	847
23	213.945	280.274	5.5	11	889
24	213.929	279.746	5.5	11	931
25	213.596	279.724	5.5	11	972
26	212.904	280.351	5.5	11	1013
27	212.88	282.203	7.61544	11	1058
28	212.47	283.934	8.91786	11	1097
29	212.357	284.651	9.31111	11	1142
30	212.632	284.458	9.53013	11	1182
31	213.028	284.557	9.39432	11	1223
32	212.98	284.216	9.41621	11	1264
33	212.975	283.282	9.08797	11	1301
34	212.755	283.081	9.56788	11	1343
35	212.768	283.358	10.0162	11	1386
36	212.472	282.973	10.0306	11	1429
37	212.668	283.206	10.4315	11	1471
38	213.099	283.78	10.6416	11	1514
39	213.257	284.202	10.8062	11	1557
40	213.701	282.72	10.7562	11	1600
41	213.657	282.427	10.5343	11	1641
42	213.847	282.289	10.6771	11	1683
43	214.45	281.691	11.2915	11	1728
44	215.082	281.653	11.3744	11	1771
45	215.451	281.621	11.4704	11	1816
46	215.668	282.232	11.4733	11	1861
47	215.928	282.301	11.6139	11	1906
48	215.807	282.37	11.5286	11	1952
49	215.364	283.12	11.8893	11	2000
50	215.88	282.36	12.1474	11	2045
51	217.082	280.784	12.2381	11	2087
52	217.547	280.045	12.3294	11	2130
53	217.457	279.941	12.2348	11	2172
54	215.772	281.986	12.2278	11	2216
55	216.721	281.219	12.0157	11	2261
56	216.43	281.087	12.1278	11	2305
57	215.646	282.193	12.3454	11	2350
58	215.651	282.773	12.5838	11	2396
59	216.673	281.684	12.3845	11	2441
60	216.842	281.757	12.2486	11	2485
61	216.673	281.769	12.1335	11	2529
62	216.573	280.804	12.2469	11	2572
63	216.332	280.086	12.5673	11	2614
64	216.178	280.793	12.5371	11	2655
65	216.084	281.54	12.6816	11	2698
66	217.013	280.26	12.5287	11	2741
67	218.628	277.642	12.6247	11	2782
68	218.752	277.535	12.6906	11	2823
69	217.549	277.913	12.6714	11	2864
70	217.711	277.339	12.9578	11	2904
71	217.763	277.35	13.088	11	2947
72	218.673	276.732	13.1872	11	2991
73	219.459	276.338	13.1364	11	3035
74	219.747	276.271	13.0846	11	3078
75	219.369	276.235	13.2491	11	3121
76	218.177	277.667	12.9775	11	3164
77	217.367	277.873	13.4417	11	3205
78	217.894	279.186	13.7166	11	3247
79	217.739	278.962	13.9322	11	3289
80	218.368	278.322	13.7658	11	3333
81	219.237	277.858	13.8296	11	3378
82	218.782	279.037	13.984	11	3423
83	218.854	279.36	14.2704	11	3480
84	219.347	279.258	14.6315	11	3527
85	218.815	280.76	15.2239	11	3573
86	218.756	281.54	15.5455	11	3618
87	219.22	280.965	15.58	11	3662
88	219.616	281.109	15.8226	11	3711
89	220.514	280.594	15.862	11	3760
90	219.849	281.337	15.8044	11	3809
91	219.42	281.172	15.9193	11	3860
92	218.808	282.117	16.1551	11	3910
93	220.325	281.404	16.0823	11	3961
94	218.505	283.258	16.6226	11	4015
95	218.638	283.81	16.7394	11	4066
96	218.665	283.37	16.5003	11	4121
97	218.537	283.419	16.5099	11	4174
98	218.025	283.764	16.5912	11	4228
99	218.572	283.573	16.8547	11	4288
100	218.021	283.375	16.6758	11	4339
101	219.326	281.347	16.4931	11	4394
102	218.854	282.269	16.6479	11	4452
103	218.238	282.931	16.6437	11	4508
104	217.897	283.699	16.533	11	4562
105	216.941	285.088	16.7394	11	4621
106	216.048	290.572	17.7433	11	4680
107	216.211	292.314	18.0566	11	4738
108	216.243	293.03	18.1821	11	4795
109	216.574	293.375	18.5384	11	4852
110	217.635	295.251	18.5737	11	4910
111	216.769	294.669	18.6257	11	4964
112	216.518	295.315	18.6021	11	5021
113	215.762	295.245	18.7794	11	5080
114	215.649	295.131	19.3283	11	5140
115	215.849	294.927	19.2491	11	5195
116	215.483	294.603	19.7981	11	5256
117	216.025	295.069	19.9131	11	5311
118	216.715	295.947	19.8018	11	5366
119	215.039	295.835	19.6125	11	5420
120	213.596	295.426	20.0955	11	5473
121	213.099	295.663	19.8471	11	5527
122	213.381	295.757	20.3001	11	5581
123	214.016	295.789	20.9745	11	5633
124	214.858	296.656	20.6142	11	5686
125	215.124	296.823	21.0271	11	5739
126	213.73	297.347	20.5853	11	5794
127	212.927	297.71	20.6081	11	5851
128	213.225	297.588	21.54	11	5908
129	213.822	297.479	22.3639	11	5964
130	214.303	297.827	22.1964	11	6020
131	213.982	297.982	22.6939	11	6074
132	214.442	298.543	21.4371	11	6128
133	213.055	299.585	21.2271	11	6179
134	213.494	299.286	21.9211	11	6234
135	213.41	299.737	21.5519	11	6284
136	213.452	299.556	22.7878	11	6338
137	213.809	300.119	22.646	11	6389
138	214.784	299.999	22.275	11	6440
139	214.041	300.507	21.205	11	6488
140	214.158	300.423	21.5465	11	6541
141	214.273	299.738	23.3231	11	6596
142	213.125	300.052	22.7302	11	6649
143	213.626	299.526	23.9976	11	6702
144	213.743	299.59	24.0182	11	6755
145	215.11	299.686	23.8272	11	6805
146	215.695	300.068	22.235	11	6856
147	215.871	299.592	22.4391	11	6908
148	213.997	299.14	25.5	11	6990
149	215.58	299.179	23.5876	11	7011
150	216.55	299.544	23.2818	11	7064
151	215.08	298.858	25.5	11	7147
152	215.696	298.999	25.5	11	7200
153	216.737	299.942	23.0553	11	7221
154	217.052	300.546	21.968	11	7272
155	213.016	300.184	25.5	11	7355
156	213.607	300.128	24.0829	11	7376
157	214.758	299.83	25.5	11	7456
158	215.354	299.253	25.5	11	7505
159	216.278	299.581	25.5	11	7554
160	213.775	300.753	23.3633	11	7574
161	211.576	300.198	25.5	11	7650
162	210.371	300.909	25.5	11	7696
163	210.208	301.61	25.5	11	7743
164	210.205	302.185	25.5	11	7790
165	209.295	303.849	25.5	11	7838
166	208.711	305.778	25.5	11	7883
167	207.94	306.293	25.5	11	7924
168	207.754	306.893	25.5	11	7968
169	207.739	306.795	25.5	11	8010
170	207.956	307.286	25.5	11	8052
171	208.935	307.162	25.5	11	8094
172	207.918	310.122	25.5	11	8136
173	208.724	309.604	25.5	11	8178
174	206.885	312.455	25.5	11	8219
175	206.864	311.355	25.5	11	8260
176	205.993	313.236	25.5	11	8300
1	195.878	309.97	5.5	12	11
2	197.1	310.122	5.5	12	48
3	196.694	310.164	5.5	12	86
4	196.934	309.372	5.5	12	124
5	198.091	307.266	5.5	12	161
6	198.43	306.827	5.5	12	199
7	197.064	311.192	5.5	12	237
8	197.141	312.347	5.5	12	275
9	196.639	313.94	5.5	12	313
10	196.703	313.818	5.5	12	353
11	196.236	314.193	5.5	12	392
12	196.619	313.51	5.5	12	429
13	196.975	313.186	5.5	12	468
14	197.067	313.72	5.5	12	509
15	197.25	314.518	5.5	12	552
16	196.59	314.495	5.5	12	593
17	196.104	314.818	5.5	12	635
18	196.451	315.355	5.5	12	678
19	196.469	314.536	5.5	12	720
20	196.094	314.171	5.5	12	761
21	196.714	313.77	5.5	12	804
22	197.358	318.488	5.5	12	848
23	198.358	310.934	7.00141	12	893
24	197.257	313.196	7.22819	12	935
25	196.674	312.765	7.50173	12	976
26	196.215	313.271	7.64713	12	1017
27	196.648	317.176	6.58622	12	1053
28	197.742	311.88	8.09774	12	1098
29	197.27	317.73	6.96816	12	1136
30	197.278	312.473	8.89377	12	1181
31	197.287	312.298	9.16057	12	1221
32	196.937	312.204	9.37451	12	1265
33	197.876	309.801	9.46175	12	1304
34	198.105	309.226	9.84365	12	1344
35	198.948	307.582	10.218	12	1387
36	198.609	307.946	10.25	12	1430
37	196.481	312.078	10.3425	12	1472
38	197.716	311.205	10.4756	12	1515
39	197.896	311.323	10.6562	12	1558
40	197.608	312.146	11.007	12	1601
41	196.074	313.876	11.6121	12	1642
42	198.133	311.286	11.3795	12	1684
43	199.034	310.54	11.8631	12	1733
44	200.513	307.763	12.048	12	1777
45	198.383	312.701	11.835	12	1822
46	199.11	312.372	11.9586	12	1866
47	198.889	313.137	12.0846	12	1912
48	199.461	311.776	12.2145	12	1957
49	199.691	311.937	12.3063	12	2001
50	199.905	311.913	12.4752	12	2046
51	200.065	312.97	12.5509	12	2088
52	200.006	314.025	12.6593	12	2131
53	200.481	312.752	12.7076	12	2173
54	199.631	312.899	12.8611	12	2217
55	200.035	313.176	12.6409	12	2262
56	200.113	312.934	12.664	12	2306
57	199.963	313.438	12.7086	12	2351
58	199.661	313.783	12.8109	12	2397
59	200.091	314.037	12.7547	12	2442
60	199.359	314.68	12.6607	12	2486
61	199.7	314.107	12.705	12	2530
62	199.993	312.923	12.8971	12	2573
63	199.322	313.766	13.0072	12	2615
64	199.77	314.292	12.6462	12	2656
65	200.071	314.268	12.5568	12	2699
66	200.088	313.887	12.8591	12	2742
67	199.844	314.085	13.1077	12	2783
68	199.538	313.719	13.1939	12	2824
69	199.586	313.62	13.289	12	2865
70	199.894	313.067	13.5135	12	2905
71	200.452	312.171	13.657	12	2948
72	199.61	313.88	13.6657	12	2992
73	199.899	313.963	13.6031	12	3036
74	199.63	313.617	13.7894	12	3079
75	199.991	313.199	14.0223	12	3122
76	199.95	313.037	13.7175	12	3165
77	199.889	313.11	14.1453	12	3206
78	200.834	313.108	13.9149	12	3248
79	200.676	311.87	14.4493	12	3303
80	200.978	312.514	14.4338	12	3347
81	201.186	312.144	14.4416	12	3392
82	200.394	313.127	14.6532	12	3437
83	200.436	313.017	14.9387	12	3481
84	201.228	313.178	15.1203	12	3528
85	201.569	312.958	15.4515	12	3574
86	201.374	314.609	15.5019	12	3619
87	201.108	315.652	15.8179	12	3663
88	200.942	322.024	15.6172	12	3712
89	201.361	315.929	16.0795	12	3761
90	201.655	316.182	16.0292	12	3810
91	200.379	322.495	15.9111	12	3861
92	201.664	315.959	16.509	12	3911
93	203.028	314.541	16.7119	12	3962
94	202.611	314.977	16.974	12	4022
95	202.493	315.649	16.7834	12	4073
96	201.931	316.248	16.8961	12	4128
97	201.468	317.052	16.767	12	4181
1	150.376	323.384	5.5	13	12
2	151.38	325.033	5.5	13	49
3	150.787	324.321	5.5	13	87
4	150.936	324.756	5.5	13	126
5	153.066	328.226	5.5	13	163
6	154.472	331.194	5.5	13	201
7	153.787	330.509	5.5	13	239
8	151.458	325.673	5.5	13	277
9	152.11	326.646	5.5	13	315
10	153.18	328.411	5.5	13	355
11	154.511	330.189	5.5	13	394
12	154.993	332.466	5.5	13	431
13	156.19	334.088	5.5	13	470
14	156.725	335.582	5.5	13	511
15	156.686	335.131	5.5	13	554
16	156.888	335.22	5.5	13	595
17	156.567	335.305	5.5	13	637
18	156.309	334.794	5.5	13	680
19	156.977	335.099	5.5	13	722
20	155.946	335.223	5.5	13	763
21	156.09	334.166	5.5	13	806
22	156.74	334.309	5.5	13	850
23	156.108	333.953	5.5	13	891
24	155.639	333.375	5.5	13	933
25	156.244	333.993	5.5	13	974
26	156.19	334.326	5.5	13	1015
27	156.155	335.014	5.5	13	1055
28	156.623	334.645	5.5	13	1095
29	155.721	335.993	5.5	13	1138
1	133.103	324.862	5.5	14	13
2	133.148	325.789	5.5	14	50
3	133.639	325.366	5.5	14	88
4	133.021	325.332	5.5	14	125
5	132.987	324.569	5.5	14	162
6	133.359	325.13	5.5	14	200
7	133.546	325.374	5.5	14	238
8	135.184	325.208	5.5	14	276
9	135.127	325.238	5.5	14	314
10	134.265	326.129	5.5	14	354
11	133.533	326.314	5.5	14	393
12	134.289	324.893	5.5	14	430
13	133.401	326.391	5.5	14	469
14	133.365	327.429	5.5	14	510
15	134.668	326.035	5.5	14	553
16	134.488	325.663	5.5	14	594
17	134.291	325.47	5.5	14	636
18	133.635	325.953	5.5	14	679
19	133.717	325.584	5.5	14	721
20	133.714	325.748	5.5	14	762
21	134.512	325.336	5.5	14	805
22	134.427	325.464	5.5	14	849
23	134.304	325.242	5.5	14	890
24	134.032	324.842	5.5	14	932
25	133.8	324.863	5.5	14	973
26	133.412	325.518	5.5	14	1014
27	133.585	325.374	5.5	14	1054
28	133.916	325.334	5.5	14	1094
29	133.606	325.312	5.5	14	1137
30	133.854	325.342	5.5	14	1177
31	133.623	325.405	5.5	14	1218
32	133.455	325.412	5.5	14	1260
33	133.361	325.268	5.5	14	1298
34	133.592	325.28	6.79082	14	1340
35	133.362	325.735	7.54963	14	1382
36	134.015	325.138	7.88846	14	1425
37	133.94	325.503	8.65553	14	1468
38	134.184	325.642	9.56842	14	1516
39	134.568	326.169	9.74339	14	1559
40	134.301	326.044	10.1193	14	1602
41	134.153	325.999	10.0612	14	1643
42	134.259	327.044	10.2021	14	1685
43	134.322	327.813	10.8141	14	1729
44	134.531	328.686	10.9269	14	1773
45	134.487	329.095	11.3432	14	1818
46	136.339	327.334	10.8564	14	1862
47	135.946	333.856	12.0307	14	1908
48	135.838	333.99	12.2277	14	1954
49	135.886	333.636	12.7629	14	2002
50	136.385	327.763	11.468	14	2041
51	136.044	328.709	11.7384	14	2084
52	137.124	327.498	11.6982	14	2127
53	136.833	328.293	11.9344	14	2174
54	136.594	327.109	11.8734	14	2218
55	137.033	326.857	11.3161	14	2258
56	136.882	327.134	11.2578	14	2302
57	137.434	326.788	11.1733	14	2347
58	137.548	326.711	11.4491	14	2392
59	137.429	326.364	11.3807	14	2438
60	138.385	326.129	11.186	14	2482
61	137.722	325.935	11.0244	14	2526
62	137.449	326.697	11.2765	14	2569
63	137.688	325.183	11.6334	14	2611
64	137.421	326.445	11.1096	14	2652
65	138.099	325.844	11.0847	14	2694
66	138.25	326.606	11.5229	14	2738
67	138.06	325.868	11.4962	14	2779
68	137.897	326.427	11.4503	14	2821
69	138.136	326.043	11.7483	14	2861
70	137.829	325.989	11.7635	14	2906
71	137.848	325.658	12.0398	14	2949
72	138.001	325.595	12.017	14	2993
73	137.344	325.841	11.9085	14	3037
74	137.445	325.769	12.356	14	3080
75	137.224	325.874	12.4037	14	3124
76	136.891	326.555	12.037	14	3166
77	137.423	325.902	12.728	14	3208
78	138.149	325.947	12.6117	14	3250
79	138.1	326.164	12.8575	14	3291
80	138.608	326.208	12.7086	14	3335
81	138.519	326.349	12.7393	14	3380
82	138.264	326.893	12.9759	14	3425
83	138.577	326.78	13.3225	14	3468
84	138.57	326.829	13.661	14	3515
85	138.848	327.744	13.7723	14	3564
86	139.155	327.656	14.0145	14	3613
87	138.907	327.624	14.3014	14	3664
88	138.852	327.551	14.4868	14	3713
89	138.744	328.066	14.5055	14	3762
90	138.998	327.969	14.6084	14	3812
91	138.766	328.315	14.9707	14	3862
92	139.294	328.257	14.9546	14	3912
93	139.45	329.508	14.8255	14	3963
94	139.313	329.805	14.9372	14	4016
95	139.304	329.093	15.4779	14	4067
96	139.218	329.734	15.5077	14	4122
97	138.702	329.906	15.2879	14	4175
98	139.947	335.791	16.224	14	4229
99	142.024	343.089	17.1291	14	4289
100	141.908	343.507	17.2492	14	4346
101	141.695	343.141	16.9298	14	4401
102	142.11	342.94	17.0333	14	4459
1	161.248	355.928	5.5	15	14
2	161.923	356.22	5.5	15	51
3	161.719	356.603	5.5	15	89
4	161.389	356.618	5.5	15	127
5	161.603	356.701	5.5	15	164
6	162.021	356.678	5.5	15	202
7	162.182	356.724	5.5	15	240
8	162.538	356.722	5.5	15	278
9	161.526	357.137	5.5	15	316
10	161.018	357.159	5.5	15	356
11	161.115	357.273	5.5	15	395
12	161.825	357.345	5.5	15	432
13	162.534	357.511	5.5	15	471
14	162.32	357.162	5.5	15	512
15	162.845	357.552	5.5	15	555
16	162.581	357.629	5.5	15	596
17	161.712	357.468	5.5	15	638
18	161.602	357.506	5.5	15	681
19	162.151	357.354	5.5	15	723
20	161.507	357.013	5.5	15	764
21	162.091	357.076	5.5	15	807
22	161.706	356.935	5.5	15	851
23	161.048	356.937	5.5	15	892
24	160.742	356.819	5.5	15	934
25	160.766	356.763	5.5	15	975
26	160.783	356.626	5.5	15	1016
27	161.518	356.515	5.5	15	1056
28	162.749	356.814	7.08627	15	1099
29	162.349	356.659	6.94384	15	1140
30	161.277	356.565	6.26085	15	1178
31	162.001	356.905	7.35601	15	1222
32	161.859	356.892	7.62468	15	1262
33	161.891	356.834	7.71757	15	1302
34	162.92	356.7	8.28499	15	1341
35	163.153	356.457	8.59367	15	1383
36	163.369	356.741	8.70389	15	1426
37	164.685	357.032	9.68094	15	1473
38	164.301	357.082	9.74736	15	1517
39	164.544	357.506	10.1474	15	1560
40	164.238	357.691	10.2528	15	1603
41	163.931	357.67	10.2796	15	1644
42	163.813	357.773	10.2105	15	1686
43	164.292	357.756	10.5979	15	1730
44	164.205	358.041	10.526	15	1774
45	163.795	358.123	10.5004	15	1819
46	164.16	358.59	10.6438	15	1863
47	164.246	358.725	10.9999	15	1909
48	164.035	358.918	11.0947	15	1955
49	164.661	359.447	11.4125	15	1997
50	164.736	359.5	11.4156	15	2042
51	167.97	359.787	12.4275	15	2089
52	167.982	360.431	12.3264	15	2132
53	167.69	360.435	12.2915	15	2175
54	167.657	360.622	12.4458	15	2220
55	167.982	360.702	12.2956	15	2264
56	168.371	360.648	12.3179	15	2308
57	168.619	360.497	12.4094	15	2353
58	168.317	360.677	12.3852	15	2399
59	166.835	360.28	12.2203	15	2444
60	166.308	360.149	12.0086	15	2488
61	166.125	360.025	11.9725	15	2532
62	166.619	360.207	12.3	15	2575
63	166.62	359.893	12.406	15	2617
64	167.463	359.904	12.0977	15	2658
65	165.192	359.45	11.6941	15	2695
66	164.362	359.249	11.8814	15	2739
67	165.114	359.502	12.2425	15	2785
68	165.713	359.616	12.5355	15	2826
69	164.476	358.864	12.3615	15	2867
70	165.024	358.949	12.5875	15	2908
71	165.018	358.986	12.6163	15	2951
72	165.165	358.867	12.6365	15	2995
73	164.725	359.111	12.6547	15	3039
74	164.212	358.877	12.7201	15	3082
75	163.696	358.933	13.0045	15	3125
76	164.396	358.941	12.7014	15	3167
77	164.806	359.04	13.1287	15	3209
78	164.404	358.784	12.9474	15	3251
79	163.79	358.65	13.1686	15	3292
80	163.43	358.553	13.0502	15	3336
81	163.485	358.776	13.1683	15	3381
82	163.248	358.972	13.4115	15	3426
83	164.669	359.685	13.8844	15	3469
84	166.141	360.068	14.2948	15	3516
85	167.581	360.665	14.8603	15	3575
86	166.093	360.431	14.759	15	3620
87	165.613	360.653	15.038	15	3665
88	164.31	360.411	15.009	15	3714
89	164.076	360.78	15.1178	15	3763
90	163.961	360.69	15.2202	15	3814
91	164.065	360.785	15.3246	15	3864
92	164.594	361.227	15.5045	15	3915
93	163.882	361.206	15.5623	15	3966
94	165.073	361.489	15.6404	15	4019
95	164.989	361.548	15.7551	15	4070
96	163.926	361.17	15.6661	15	4125
97	163.766	361.162	15.7063	15	4178
98	163.991	360.931	15.8313	15	4232
99	163.994	360.939	15.7231	15	4285
100	164.315	360.965	15.6663	15	4343
101	163.578	360.977	15.6806	15	4398
102	163.879	361.002	15.7813	15	4456
103	163.646	360.988	15.7947	15	4512
104	163.799	360.949	15.8255	15	4566
105	163.931	360.715	15.9315	15	4625
106	164.051	360.824	15.9766	15	4677
107	163.779	360.592	15.9916	15	4735
108	162.906	360.273	15.8907	15	4792
109	162.331	360.058	15.9115	15	4849
110	162.267	359.872	16.0646	15	4907
111	162.958	360.011	16.4625	15	4961
112	163.343	360.04	16.5054	15	5018
113	164.031	360.478	16.6608	15	5077
114	163.136	360.255	16.5991	15	5136
115	164.271	360.519	16.8237	15	5197
116	164.083	360.419	17.0169	15	5255
117	163.459	360.091	16.9693	15	5310
118	163.301	360.164	17.1196	15	5365
119	163.43	359.903	17.1839	15	5419
120	163.98	360.478	17.3677	15	5472
121	163.807	360.228	17.5653	15	5525
122	163.299	360.4	17.5323	15	5578
123	163.248	360.456	17.6718	15	5630
124	163.001	360.536	17.7862	15	5683
125	163.26	360.701	17.9617	15	5737
126	163.387	360.906	18.0564	15	5792
127	163.675	361.27	18.2725	15	5849
128	164.156	361.594	18.284	15	5906
129	163.761	361.629	18.3308	15	5961
130	163.82	361.748	18.5454	15	6017
131	163.863	361.864	18.601	15	6070
132	163.84	362.084	18.749	15	6126
133	164.05	362.05	18.909	15	6177
134	164.325	362.02	18.8561	15	6230
135	165.069	362.329	19.0951	15	6282
136	164.297	362.086	18.9386	15	6334
137	164.122	362.169	18.9612	15	6385
138	164.257	362.025	19.016	15	6435
139	165.034	362.374	19.3494	15	6490
140	165.069	362.444	19.2705	15	6543
141	164.518	362.504	19.1343	15	6591
142	165.007	362.475	19.3214	15	6646
143	164.353	362.465	19.1669	15	6697
144	164.671	362.54	19.3249	15	6751
145	164.905	362.402	19.4231	15	6802
146	164.877	362.315	19.5923	15	6853
147	164.856	362.112	19.694	15	6906
148	164.65	362.125	19.6743	15	6957
149	164.637	362.007	19.8009	15	7009
150	164.329	361.871	19.5897	15	7061
151	164.85	362.071	19.7959	15	7113
152	164.519	361.984	19.8666	15	7167
153	164.592	361.951	19.8669	15	7218
154	165.443	361.812	19.5157	15	7270
155	165.233	361.896	19.5327	15	7321
156	165.544	362.071	19.8402	15	7373
157	164.931	361.94	19.8486	15	7424
158	164.654	362.019	20.2671	15	7475
159	164.327	361.795	20.3203	15	7523
160	164.368	361.692	20.5356	15	7572
161	164.796	362.003	20.5942	15	7621
162	164.897	362	20.7018	15	7669
163	164.744	362.056	20.832	15	7715
164	163.571	361.279	20.8276	15	7762
165	163.375	361.097	20.8167	15	7809
166	164.006	361.401	21.0488	15	7855
167	164.608	361.64	21.6283	15	7900
168	165.412	362.018	21.9054	15	7943
169	166.365	362.556	22.1883	15	7986
170	166.184	362.777	22.5956	15	8029
171	165.791	362.973	22.9373	15	8071
172	166.288	363.359	23.2147	15	8113
173	166.609	363.48	23.0181	15	8155
174	166.409	363.667	23.5523	15	8196
175	166.741	363.844	24.022	15	8237
176	166.907	364.173	24.0413	15	8277
1	84.6189	394.553	5.5	16	15
2	84.5773	394.859	5.5	16	52
3	84.8588	394.762	5.5	16	90
4	85.9273	395.285	5.5	16	128
5	85.5529	395.528	5.5	16	165
6	85.7795	395.842	5.5	16	203
7	85.3977	396.737	5.5	16	241
8	85.5495	396.741	5.5	16	279
9	86.3291	396.961	5.5	16	317
10	86.746	397.414	5.5	16	357
11	86.7987	397.431	5.5	16	396
12	85.0413	396.697	5.5	16	433
13	85.0978	397.256	5.5	16	472
14	84.5829	396.607	5.5	16	513
15	83.958	396.837	5.5	16	556
16	83.9929	396.268	5.5	16	597
17	83.3052	395.964	5.5	16	639
18	82.5182	395.126	5.5	16	682
19	82.7847	395.158	5.5	16	724
20	82.8744	395.276	5.5	16	765
21	82.9396	395.644	7.31027	16	808
22	82.6619	395.288	8.23201	16	852
23	83.6588	396.001	8.10006	16	894
24	84.2238	395.872	8.13186	16	936
25	85.6162	395.539	7.79492	16	977
26	85.9782	395.41	7.77983	16	1018
27	86.4153	395.316	8.30606	16	1059
28	87.4751	395.57	9.05244	16	1100
29	88.5799	395.967	9.54645	16	1143
30	89.1369	396.054	9.7544	16	1183
31	88.2784	395.725	9.84869	16	1224
32	87.6317	395.862	9.97742	16	1266
33	87.0989	395.728	10.0011	16	1305
34	87.7659	395.269	10.1995	16	1345
35	84.8625	394.268	10.3618	16	1388
36	85.7859	394.769	10.4771	16	1431
37	85.4999	394.524	10.8392	16	1474
38	83.6091	396.806	12.0619	16	1520
39	82.9773	396.335	12.032	16	1563
40	84.1306	397.097	12.423	16	1605
41	83.9937	397.666	12.5418	16	1646
42	84.4355	397.554	12.7306	16	1689
43	86.6416	397.143	12.4231	16	1734
44	89.9536	397.572	12.3631	16	1778
45	89.4285	399.472	12.5453	16	1823
46	89.9623	401.283	12.0327	16	1867
47	86.5403	399.23	12.8965	16	1913
48	90.185	400.299	13.2756	16	1958
49	94.004	400.799	13.9127	16	2003
50	94.0938	400.413	13.9122	16	2047
51	96.8717	401.465	14.3578	16	2107
52	96.3544	400.341	13.2647	16	2133
53	97.2533	403.704	13.1403	16	2176
54	96.8663	404.796	12.583	16	2221
55	95.0901	402.502	12.4612	16	2265
56	93.7873	402.209	12.8526	16	2309
57	93.0533	402.866	12.7892	16	2354
58	93.3523	403.165	12.866	16	2400
59	93.0068	402.998	12.9398	16	2445
60	93.8772	402.339	13.1043	16	2489
61	93.0373	401.848	13.335	16	2533
62	93.5289	402.628	13.1546	16	2576
63	91.6603	401.787	13.2439	16	2618
64	95.0749	403.549	12.87	16	2659
65	96.1492	403.853	13.0752	16	2701
66	95.0835	403.824	13.0509	16	2744
67	96.5648	403.793	13.4642	16	2786
68	94.2614	402.68	13.5907	16	2827
69	95.0999	402.069	13.9277	16	2868
70	95.7914	402.42	14.2115	16	2909
71	94.4946	402.479	13.9949	16	2952
72	95.8354	403.397	14.0806	16	2996
73	95.9119	403.745	13.8185	16	3040
74	96.2328	404.167	13.8591	16	3083
75	94.9209	403.117	13.8873	16	3126
76	92.4326	401.104	13.6442	16	3168
77	93.3458	402.274	13.7102	16	3210
78	95.4772	404.053	13.4404	16	3252
79	97.1798	403.961	14.2865	16	3304
80	93.4285	401.864	14.5106	16	3348
81	98.213	404.586	15.1132	16	3393
82	94.0886	402.416	15.1519	16	3438
83	99.6652	405.765	15.5018	16	3483
84	99.4414	405.96	15.8104	16	3530
1	114.341	415.548	5.5	17	16
2	113.977	415.491	7.55268	17	56
3	114.473	415.645	7.30798	17	94
4	115.883	415.31	5.5	17	129
5	118.064	413.59	6.66061	17	166
6	120.985	411.239	5.5	17	204
7	121.296	411.215	5.5	17	242
8	127.039	411.924	7.74564	17	282
9	120.568	413.364	7.97734	17	320
10	120.648	414.667	8.20957	17	359
11	121.731	414.871	7.31232	17	398
12	118.309	416.771	7.85089	17	435
13	117.835	416.48	7.14339	17	474
14	120.418	413.622	5.5	17	514
15	119.743	413.322	6.38428	17	557
16	120.189	413.505	7.68451	17	601
17	116.966	415.456	9.49866	17	644
18	116.126	416.089	9.50275	17	687
19	117.857	416.215	8.02673	17	727
20	116.408	416.492	9.61887	17	769
21	117.531	415.335	9.50791	17	812
22	119.191	414.719	8.68015	17	853
23	117.712	415.553	9.55961	17	896
24	117.485	415.517	10.1062	17	938
25	118.28	415.437	9.85296	17	979
26	118.296	415.409	9.96341	17	1020
27	114.044	415.862	11.804	17	1061
28	111.326	416.147	12.6796	17	1106
29	112.033	416.248	12.4822	17	1148
30	112.649	416.363	12.5336	17	1188
31	112.891	416.517	12.5388	17	1229
32	113.515	416.972	12.7396	17	1270
33	113.446	416.912	12.8554	17	1310
34	113.885	416.774	13.0218	17	1348
35	115.089	416.312	12.853	17	1391
36	117.056	415.53	12.9113	17	1435
37	116.901	415.645	13.1413	17	1478
38	115.76	416.399	13.6482	17	1521
39	115.797	416.923	13.6725	17	1564
40	115.606	417.263	14.141	17	1606
41	116.017	417.146	13.8299	17	1647
42	117.313	416.838	13.7181	17	1690
43	117.47	416.97	13.8521	17	1735
44	119.117	416.619	13.5681	17	1779
45	117.936	417.768	13.8539	17	1824
46	114.108	419.805	14.5306	17	1886
47	114.145	419.205	15.3775	17	1932
48	116.618	418.747	14.803	17	1978
49	119.271	417.168	13.7998	17	2004
50	119.526	416.481	13.9337	17	2048
51	118.95	417.297	14.6741	17	2108
52	119.116	417.988	14.8941	17	2150
53	119.098	418.774	15.0482	17	2193
54	119.013	419.31	14.9373	17	2237
55	119.09	419.463	15.0405	17	2283
56	120.039	418.604	14.9915	17	2325
57	121.075	417.317	14.6885	17	2371
58	121.139	417.1	14.6253	17	2416
59	120.63	417.321	14.8937	17	2460
60	120.708	417.29	14.8486	17	2504
61	121.235	416.891	14.7409	17	2547
62	121.08	416.731	14.8064	17	2590
63	121.182	416.575	14.6726	17	2634
64	121.305	416.644	14.6047	17	2674
65	120.871	416.588	14.9226	17	2717
66	120.389	417.116	15.1183	17	2759
67	121.098	416.415	15.1017	17	2799
68	121.194	416.451	15.1362	17	2840
69	121.367	416.244	14.9384	17	2881
70	121.2	416.136	15.2072	17	2922
71	121.229	416.082	15.3258	17	2966
72	121.45	416.365	15.2719	17	3011
73	121.672	416.529	15.5094	17	3052
74	121.462	416.319	15.6633	17	3094
75	121.035	416.01	15.6772	17	3138
76	120.943	416.243	15.4209	17	3179
77	120.655	416.738	15.8827	17	3220
78	120.573	416.666	15.9204	17	3263
79	121.172	416.307	16.0763	17	3305
80	121.391	416.299	16.1168	17	3349
81	122.267	415.961	16.2801	17	3394
82	121.797	416.245	16.4161	17	3439
83	121.878	416.562	16.6404	17	3484
84	121.424	417.362	16.9802	17	3533
85	121.853	417.249	17.2529	17	3580
86	122.066	417.566	17.5525	17	3624
87	121.711	418.285	17.7871	17	3670
88	122.145	418.248	17.9708	17	3718
89	122.064	418.506	18.0191	17	3767
90	122.117	418.759	17.9883	17	3818
91	122.453	418.713	18.0089	17	3867
92	122.786	418.334	18.0777	17	3919
93	122.921	418.621	18.3154	17	3970
94	122.317	419.279	18.5723	17	4024
95	122.073	419.431	18.5352	17	4075
96	121.905	419.606	18.6281	17	4130
97	121.88	419.493	18.583	17	4183
98	122.183	419.139	18.6259	17	4236
99	122.173	419.383	18.6169	17	4291
100	122.089	419.292	18.4722	17	4348
101	121.559	419.779	18.7347	17	4403
102	121.491	419.824	18.7254	17	4461
103	121.327	419.907	18.8608	17	4516
104	121.296	419.803	18.8583	17	4570
105	121.203	419.789	18.9762	17	4628
106	120.226	420.207	19.4204	17	4684
107	119.706	421.403	19.4655	17	4742
108	121.764	420.872	19.3243	17	4798
109	126.586	415.258	18.7814	17	4854
110	125.802	415.316	19.1483	17	4911
111	124.332	416.388	19.8055	17	4967
112	123.479	416.549	19.4725	17	5023
113	122.326	417.658	19.5909	17	5081
114	121.704	418.634	19.8764	17	5141
115	121.749	418.569	20.0338	17	5200
116	121.684	418.692	20.3505	17	5257
117	120.486	419.275	20.5526	17	5312
118	120.079	419.391	20.7264	17	5367
119	120.246	419.217	20.8771	17	5421
120	121.926	418.551	21.1236	17	5474
121	120.383	419.392	21.2656	17	5529
122	120.705	419.552	21.8827	17	5583
123	121.249	419.241	21.827	17	5635
124	121.649	419.314	21.5399	17	5687
125	121.548	419.741	22.0731	17	5742
126	122.178	419.604	21.9094	17	5797
127	121.76	420.306	22.1965	17	5854
128	122.318	420.329	22.8066	17	5911
129	122.406	420.714	23.3081	17	5965
130	121.679	421.615	25.5	17	6057
131	121.9	421.351	25.5	17	6110
132	121.765	421.901	23.8999	17	6131
133	121.19	422.113	23.8663	17	6181
134	122.451	421.885	23.8651	17	6235
135	121.871	422.126	25.5	17	6319
136	122.301	422.303	25.5	17	6370
137	122.292	422.432	25.5	17	6419
138	121.84	422.317	25.5	17	6471
139	121.752	422.568	25.5	17	6524
140	121.381	422.622	25.5	17	6575
141	121.967	422.262	25.5	17	6628
142	122.744	421.806	25.5	17	6681
143	121.802	422.042	25.5	17	6734
144	121.898	422.053	25.5	17	6786
145	121.609	422.346	25.5	17	6836
146	120.846	422.41	25.5	17	6887
147	121.144	422.191	25.5	17	6939
148	120.989	422.188	25.5	17	6991
149	120.765	422.483	25.5	17	7043
150	120.554	422.4	25.5	17	7096
151	120.864	422.102	25.5	17	7148
152	121.385	421.92	25.5	17	7201
153	121.063	421.835	25.5	17	7252
154	119.894	422.109	25.5	17	7305
155	120.294	422.392	25.5	17	7357
156	120.293	422.411	25.5	17	7408
157	120.056	422.358	25.5	17	7458
158	121.478	421.748	25.5	17	7507
159	121.022	421.752	25.5	17	7556
160	120.155	422.339	25.5	17	7605
161	120.497	422.296	25.5	17	7654
162	120.687	422.479	25.5	17	7700
163	120.515	422.527	25.5	17	7747
164	120.485	422.741	25.5	17	7794
165	120.208	422.482	25.5	17	7841
166	120.132	422.707	25.5	17	7886
167	120.962	422.193	25.5	17	7929
168	120.285	423.024	25.5	17	7973
169	120.626	423.604	25.5	17	8014
170	120.198	424.292	25.5	17	8056
171	120.334	424.671	25.5	17	8098
172	120.12	425.03	25.5	17	8140
173	120.34	425.366	25.5	17	8181
174	120.686	425.597	25.5	17	8223
175	120.879	425.341	25.5	17	8264
176	121.249	425.638	25.5	17	8304
1	105.829	426.71	5.5	18	17
2	101.669	438.993	5.5	18	53
3	100.131	448.056	5.5	18	92
4	102.081	439.63	5.5	18	131
5	102.65	439.56	5.5	18	167
6	102.73	439.976	5.5	18	205
7	100.577	447.986	5.5	18	243
8	101.34	447.38	5.5	18	280
9	101.245	448.251	5.5	18	318
10	101.521	448.142	5.5	18	358
11	102.366	447.143	5.5	18	397
12	101.921	446.896	5.5	18	434
13	102.522	445.693	5.5	18	473
14	104.367	450.41	5.5	18	515
15	104.941	449.877	5.5	18	559
16	104.498	450.002	5.5	18	598
17	104.438	449.02	5.5	18	640
18	103.744	447.904	5.5	18	683
19	104.173	447.183	5.5	18	725
20	103.763	448.011	8.80832	18	766
21	104.89	445.883	7.54736	18	809
[truncated: 6,316 more rows]
