# Supplementary material for: Functional visualization of NK cell-mediated killing of metastatic single tumor cells
Source: eLife journal article supplement (doi:10.7554/elife.76269), 2022-02-03
Supplement: supp [file tumor_2.xlsx]

## Sheet: Sheet1
1	144.802	44.7392	13.3122	1	0
2	145.025	44.5357	13.2878	1	48
3	143.621	45.6367	13.2381	1	97
4	142.173	46.3363	13.3633	1	144
5	141.893	46.4131	13.313	1	192
6	135.303	45.3087	14.5937	1	241
7	140.669	46.9387	12.9965	1	289
8	139.748	47.6871	12.7476	1	337
9	139.21	48.2633	12.6004	1	386
10	138.729	48.9317	12.7778	1	435
11	138.506	48.944	12.9192	1	484
12	137.98	48.281	13.2303	1	534
13	133.85	46.3228	14.475	1	586
14	132.096	45.0593	15.6561	1	638
15	131.794	45.1024	15.7274	1	691
16	137.678	50.1728	12.6712	1	744
17	138.24	53.6921	12.296	1	798
18	138.303	53.292	12.2714	1	851
19	137.888	47.0789	13.5491	1	905
20	129.499	44.1597	15.4827	1	985
21	129.558	44.0374	15.7555	1	1039
22	129.65	44.369	16.058	1	1093
23	129.217	44.7323	16.3716	1	1147
24	129.374	45.4422	16.1433	1	1200
26	130.117	44.8847	15.535	1	1307
27	130.024	44.9431	15.8009	1	1362
28	129.733	45.1181	16.1655	1	1418
29	127.235	47.2721	19.0338	1	1472
30	124.842	51.9759	25.5	1	1547
31	127.295	49.3395	20.9236	1	1580
32	124.076	53.3532	25.5	1	1654
33	125.454	53.5015	25.5	1	1708
34	126.977	50.7534	21.8134	1	1737
35	127.191	53.9816	25.5	1	1814
36	132.556	47.4216	15.5381	1	1841
1	145.895	186.484	12.7086	2	1
2	145.638	187.552	12.696	2	49
3	145.597	187.331	12.4688	2	98
4	145.84	186.509	12.5761	2	145
5	145.545	187.154	12.527	2	193
6	146.41	187.277	12.8392	2	242
7	146.656	187.049	13.0543	2	290
8	146.408	187.122	12.7947	2	338
9	144.926	187.581	12.6174	2	387
10	144.555	187.299	12.4548	2	436
11	144.788	187.219	12.7057	2	485
12	144.672	187.742	12.7763	2	535
13	145.377	187.468	13.0252	2	587
14	145.658	187.653	13.364	2	639
15	145.186	187.716	13.1064	2	692
16	145.195	186.514	13.2746	2	745
17	144.765	186.752	13.0274	2	799
18	144.596	186.769	13.0195	2	852
19	145.35	186.563	13.445	2	906
20	145.583	186.841	13.6275	2	959
21	144.705	187.358	13.4809	2	1013
22	144.454	187.701	13.5501	2	1067
23	143.665	187.761	13.3836	2	1121
24	143.689	186.91	13.2122	2	1176
25	144.258	186.381	13.3333	2	1230
26	144.222	186.953	13.6628	2	1284
27	144.673	187.11	13.7084	2	1338
28	144.704	187.262	13.8435	2	1395
29	144.322	187.006	13.9743	2	1450
30	144.18	187.795	14.1016	2	1502
31	144.025	187.973	13.9604	2	1557
32	144.026	190.305	14.2569	2	1630
33	145.334	190.348	14.6194	2	1685
34	145.193	190.274	14.7718	2	1736
35	145.854	191.893	15.6016	2	1789
36	144.379	191.683	15.0287	2	1842
37	145.355	191.951	15.4884	2	1892
38	144.832	192.21	15.2683	2	1939
39	144.862	192.851	15.1867	2	1989
40	145.857	192.777	15.7627	2	2042
41	147.07	192.303	15.8697	2	2093
42	146.822	193.3	16.0318	2	2141
43	146.292	195.58	16.0315	2	2191
44	146.448	196.196	16.1127	2	2241
45	145.291	197.096	15.5554	2	2290
46	145.359	196.696	15.5993	2	2340
47	145.792	196.493	15.7713	2	2389
48	145.538	196.435	15.5775	2	2440
49	145.511	195.465	15.5994	2	2490
50	144.395	195.631	15.1326	2	2538
51	144.339	195.403	15.2514	2	2586
52	143.954	195.143	15.2638	2	2637
53	144.283	195.218	15.3081	2	2686
54	145.064	194.773	15.7089	2	2735
55	145.059	193.749	15.6653	2	2784
56	145.452	192.83	15.6101	2	2835
57	145.11	192.635	15.876	2	2883
58	144.371	192.408	15.534	2	2933
59	143.81	193.236	15.5161	2	2982
60	144.462	192.926	15.7254	2	3031
61	144.922	192.518	15.9926	2	3080
62	145.092	192.474	15.9284	2	3129
63	144.685	192.718	15.9251	2	3178
64	144.249	192.949	15.7552	2	3228
65	144.097	192.848	15.9066	2	3276
66	144.234	192.447	16.0445	2	3322
67	144.692	192.07	16.5131	2	3368
68	145.503	190.103	16.38	2	3416
69	147.741	190.464	17.5059	2	3463
70	147.288	190.887	17.3411	2	3515
71	146.237	191.39	17.0952	2	3566
72	146.448	191.348	17.1231	2	3616
73	146.585	190.958	17.3012	2	3667
74	146.052	192.508	17.6839	2	3716
75	146.654	192.938	17.9938	2	3766
76	147.225	193.444	17.9746	2	3815
77	146.731	193.89	17.8172	2	3863
78	146.39	194.401	17.6818	2	3912
79	145.904	194.516	17.6779	2	3960
80	145.724	194.378	17.5069	2	4010
81	146.35	194.842	17.5314	2	4060
82	147.61	192.947	17.9002	2	4110
83	147.412	194.329	18.0599	2	4158
84	147.004	194.143	18.0627	2	4205
85	145.714	194.909	17.5899	2	4253
86	145.177	194.377	17.3559	2	4301
87	146.535	193.79	17.5831	2	4349
88	146.124	193.772	17.3602	2	4396
89	147.449	194.113	18.0087	2	4444
90	147.768	192.846	17.8909	2	4491
91	147.912	192.874	18.5554	2	4536
92	146.722	193.533	17.783	2	4582
93	145.578	194.202	17.3271	2	4630
94	145.901	194.009	17.4843	2	4678
95	146.63	193.658	17.9577	2	4723
96	147.598	193.054	18.1632	2	4768
97	147.208	193.331	18.1052	2	4812
98	146.426	193.152	17.7533	2	4855
99	146.963	192.106	18.3878	2	4897
100	146.42	192.414	18.0694	2	4942
101	146.799	191.143	18.2594	2	4988
102	146.84	192.577	18.4952	2	5032
103	146.239	193.596	18.4009	2	5075
104	145.866	193.598	18.6897	2	5119
105	145.704	192.852	18.4768	2	5163
106	144.937	194.244	17.739	2	5205
1	173.863	205.562	13.0863	3	2
2	174.576	205.854	13.3278	3	50
3	173.814	205.567	13.285	3	99
4	173.949	205.38	13.0266	3	146
5	174.263	205.445	13.6372	3	194
6	174.953	205.839	13.8115	3	243
7	174.956	205.599	13.9223	3	291
8	174.732	205.713	13.7859	3	339
9	174.111	205.617	13.89	3	388
10	173.724	205.371	13.7534	3	437
11	173.733	205.156	13.7644	3	486
12	174.238	205.365	14.2304	3	536
13	174.361	205.51	14.6552	3	615
14	174.953	205.59	14.6656	3	666
15	175.065	205.6	14.6278	3	718
16	174.471	205.229	14.5114	3	771
17	173.608	204.499	13.9171	3	800
18	173.713	205.044	14.427	3	878
19	174.136	205.115	14.7352	3	932
20	174.294	204.961	15.0174	3	986
21	174.689	204.823	15.2174	3	1040
22	174.959	205.029	15.3238	3	1094
23	174.033	204.641	15.0308	3	1148
24	173.772	204.527	14.9957	3	1201
25	173.815	204.434	15.0125	3	1254
26	173.698	204.63	15.3984	3	1308
27	174.312	204.742	15.2709	3	1363
28	174.695	204.72	15.6495	3	1419
29	174.556	204.8	15.6832	3	1471
30	174.226	204.746	15.9442	3	1523
31	174.408	205.349	15.6048	3	1578
32	174.346	205.705	15.7877	3	1631
33	175.827	206.606	16.3809	3	1686
34	175.728	207.191	17.3182	3	1739
35	175.959	207.508	17.4402	3	1790
36	174.633	208.73	18.2157	3	1843
38	174.826	209.015	18.1458	3	1940
39	174.44	208.84	18.0477	3	1990
40	175.513	208.428	18.4068	3	2043
42	176.441	208.714	18.6605	3	2142
43	176.775	209.216	18.178	3	2192
44	176.851	208.919	18.389	3	2242
45	176.139	209.002	18.1021	3	2291
46	176.367	208.315	17.7732	3	2341
47	176.705	208.209	17.6306	3	2390
48	176.9	208.159	17.9692	3	2441
49	177.697	208.398	17.864	3	2491
50	176.616	208.103	17.521	3	2539
51	175.795	208.466	18.1398	3	2587
52	175.564	208.553	18.3242	3	2638
53	175.853	208.131	18.0474	3	2687
54	176.794	208.079	18.2187	3	2736
55	177.051	207.697	18.3059	3	2785
56	177.343	207.734	18.3043	3	2836
57	176.583	207.81	18.3286	3	2884
58	175.921	207.332	19.153	3	2934
59	175.942	207.546	18.5849	3	2983
60	176.086	207.374	18.8727	3	3032
61	176.217	207.534	18.6741	3	3081
62	177.166	207.248	18.5608	3	3130
63	177.452	207.15	18.361	3	3179
64	176.293	206.865	18.4901	3	3229
65	175.948	206.506	17.9859	3	3277
66	176.039	206.454	18.3899	3	3323
67	176.468	206.551	19.0383	3	3369
68	176.797	206.86	19.239	3	3417
69	177.693	206.901	19.1294	3	3464
70	178.075	207.688	19.3304	3	3516
71	177.327	207.807	19.6626	3	3567
72	177.484	207.508	19.4057	3	3617
73	177.28	207.297	18.6652	3	3668
74	177.323	207.365	19.1747	3	3717
75	177.051	208.031	19.9402	3	3767
76	177.984	208.225	20.3236	3	3816
77	178.236	208.648	19.7391	3	3864
78	177.636	208.613	20.6987	3	3913
79	177.892	208.525	19.8135	3	3961
80	177.597	208.508	19.3438	3	4011
81	177.687	208.653	19.3268	3	4061
82	178.645	208.658	20.2948	3	4111
83	178.646	208.492	20.6856	3	4159
84	179.041	208.768	20.5112	3	4206
85	178.755	208.817	20.2686	3	4254
86	178.007	208.428	19.9036	3	4302
87	178.164	208.403	20.1471	3	4350
88	177.548	208.477	20.1629	3	4397
89	178.737	208.179	19.8942	3	4445
90	178.795	208.369	20.4838	3	4492
91	178.929	208.53	20.5968	3	4537
92	178.788	208.506	20.0798	3	4583
93	177.563	208.474	20.0848	3	4631
94	177.737	208.327	19.9293	3	4679
95	178.079	208.432	20.4644	3	4724
96	179.13	208.296	20.9532	3	4769
97	179.311	208.228	20.915	3	4813
98	179.283	208.731	20.3547	3	4856
99	178.763	208.222	20.6436	3	4898
100	177.917	208.257	20.7233	3	4943
101	178.217	208.021	20.1452	3	4989
102	179.057	208.243	21.4052	3	5033
103	178.805	208.119	21.5838	3	5076
104	178.829	208.448	21.5389	3	5120
105	178.985	208.48	21.0819	3	5165
106	177.57	208.141	19.3905	3	5207
1	335.086	231.158	10.7041	4	3
2	335.251	231.415	10.1415	4	51
3	335.377	231.202	10.3462	4	100
4	335.323	231.05	10.6929	4	147
5	335.132	230.801	11.2646	4	195
6	335.201	230.518	10.88	4	244
7	335.352	230.479	10.6233	4	292
8	335.104	230.674	10.295	4	340
9	335.272	230.598	10.7087	4	389
10	335.175	230.583	11.1617	4	438
11	335.006	230.633	11.4077	4	487
12	334.602	230.595	11.4881	4	537
13	334.702	230.298	11.4449	4	588
14	334.786	230.417	11.1757	4	640
15	334.691	230.463	11.165	4	693
16	335.07	230.341	11.204	4	746
17	334.734	230.474	11.536	4	801
18	334.443	230.155	11.822	4	855
19	334.276	230.089	12.0055	4	909
20	334.738	229.678	11.9239	4	962
21	334.863	229.832	11.7011	4	1014
22	335.014	229.919	11.7492	4	1068
23	334.698	229.963	11.8986	4	1124
24	334.671	229.794	12.3129	4	1179
25	334.639	229.517	12.4118	4	1233
26	334.809	229.541	12.4337	4	1287
27	334.689	229.561	12.3513	4	1341
28	334.93	229.452	12.2098	4	1398
29	334.961	229.799	12.2973	4	1453
30	335.248	229.895	12.7249	4	1504
31	335.437	229.884	13.0717	4	1560
32	335.47	229.836	13.2076	4	1611
33	335.713	230.007	13.3064	4	1666
34	335.804	230.278	13.6231	4	1717
35	335.925	230.572	13.3351	4	1770
36	335.87	230.609	13.5994	4	1823
37	336.307	231.051	13.6595	4	1876
38	336.087	231.269	13.566	4	1924
39	336.352	231.52	14.0077	4	1975
40	336.358	231.615	14.106	4	2025
41	336.217	232.023	13.8009	4	2076
42	336.008	232.502	13.6008	4	2126
43	336.235	232.323	13.4967	4	2176
44	336.332	232.502	13.7845	4	2226
45	336.293	232.332	13.7308	4	2276
46	336.07	232.43	13.9152	4	2327
47	335.835	232.239	13.6757	4	2376
48	335.877	232.154	13.6009	4	2426
49	336.191	232.105	13.7733	4	2475
50	335.778	232.34	13.8667	4	2526
51	335.903	232.221	13.6957	4	2574
52	335.799	232.146	13.9205	4	2623
53	335.778	231.918	14.2476	4	2671
54	335.771	231.758	13.8787	4	2721
55	335.74	231.731	14.0226	4	2769
56	335.971	231.404	13.9042	4	2819
57	336.276	231.057	14.4473	4	2888
58	336.212	230.977	14.5585	4	2938
59	336.022	231.154	14.45	4	2988
60	335.696	231.246	14.6126	4	3036
61	335.86	230.893	14.8638	4	3085
62	335.854	230.787	14.4097	4	3134
63	335.573	231.263	14.2862	4	3183
64	335.727	231.239	14.4175	4	3234
65	336.006	230.607	14.8785	4	3281
66	335.866	230.665	15.0201	4	3327
67	335.418	230.896	15.1256	4	3372
68	335.803	230.667	15.2772	4	3421
69	336.049	230.582	15.1422	4	3468
70	336.536	230.824	15.1289	4	3520
71	336.661	231.054	15.4356	4	3570
72	336.412	231.835	15.3425	4	3619
73	336.33	232.044	15.8671	4	3670
74	336.584	232.125	16.0968	4	3719
75	336.453	232.325	15.8669	4	3769
76	336.348	232.63	15.6163	4	3818
77	336.737	232.727	15.8966	4	3866
78	336.506	233.245	15.8705	4	3915
79	336.805	233.389	15.9199	4	3963
80	336.837	233.587	16.1632	4	4013
81	336.548	233.634	16.238	4	4063
82	336.994	233.211	15.9608	4	4113
83	336.916	233.33	15.8878	4	4161
84	336.834	233.306	15.8918	4	4208
85	336.658	233.43	15.8523	4	4256
86	336.744	233.223	16.0551	4	4304
87	336.402	233.192	16.0582	4	4352
88	336.317	233.199	16.074	4	4399
89	336.01	233.057	15.6952	4	4447
90	336.286	233.012	15.7169	4	4494
91	336.572	233.063	15.6587	4	4539
92	336.003	233.117	15.6507	4	4585
93	335.915	233.411	15.8396	4	4633
94	336	233.175	15.984	4	4681
95	336.076	232.947	16.247	4	4726
96	336.31	232.58	16.0732	4	4771
97	336.159	232.706	15.9619	4	4815
98	336.364	232.5	15.9503	4	4858
99	336.458	232.63	16.2276	4	4900
100	336.23	232.559	16.3339	4	4945
101	335.952	232.818	16.3317	4	4991
102	335.761	232.641	16.2769	4	5035
103	335.851	232.658	16.4443	4	5078
104	335.984	232.422	16.4828	4	5122
105	336.413	232.322	16.4032	4	5167
106	336.098	232.688	16.3214	4	5211
1	408.982	35.6325	13.8106	5	4
2	409.535	35.6771	13.823	5	52
3	406.678	35.8078	14.0676	5	101
4	410.051	35.4595	13.7696	5	148
5	409.115	36.2074	13.7677	5	196
6	407.852	36.6374	14.1367	5	245
7	408.43	35.9968	13.9684	5	293
8	408.258	35.57	14.0126	5	341
9	409.172	35.1771	14.027	5	390
10	410.03	34.9005	14.115	5	439
11	409.313	34.889	14.3016	5	515
12	409.048	34.924	14.3042	5	567
13	409.073	34.8234	14.3143	5	619
14	409.91	34.969	14.4729	5	669
15	409.595	35.0327	14.4163	5	722
16	409.622	35.0867	14.417	5	775
17	409.833	35.076	14.539	5	829
18	410.495	34.7472	14.5237	5	882
19	410.988	34.7066	14.6255	5	936
20	411.106	34.6462	14.7501	5	990
21	410.993	34.5574	14.9077	5	1044
22	410.57	34.5905	14.8447	5	1098
23	411.102	34.3829	14.792	5	1152
24	411.54	34.273	14.9067	5	1205
25	410.621	34.4262	14.9618	5	1258
26	409.766	34.4576	15.0459	5	1312
27	410.92	34.194	15.2029	5	1367
28	411.377	34.1909	15.337	5	1423
29	411.778	34.4692	15.5336	5	1476
30	413.314	34.1851	15.8399	5	1527
31	412.811	34.8534	15.8812	5	1583
32	413.344	35.0521	15.5478	5	1635
33	413.384	34.922	15.8923	5	1689
34	413.224	35.0822	16.1713	5	1740
35	414.098	35.0259	16.4528	5	1793
36	416.029	34.478	16.4087	5	1845
37	417.193	34.1454	16.586	5	1894
38	416.651	34.5645	16.7213	5	1942
39	416.193	34.7198	16.6587	5	1992
40	416.168	35.0374	16.8729	5	2049
41	415.368	35.6095	17.0962	5	2101
42	415.095	35.8654	17.0796	5	2150
43	415.09	35.7814	16.9738	5	2199
44	415.148	35.7183	16.9238	5	2249
45	415.811	35.6843	16.9348	5	2299
46	415.439	35.7437	16.9736	5	2350
47	416.008	35.8427	16.7336	5	2392
48	415.821	36.0168	16.8221	5	2449
49	416.462	35.7294	16.9217	5	2499
50	417.157	35.4721	16.7124	5	2541
51	417.743	35.4255	16.6309	5	2589
52	417.658	35.3957	16.7176	5	2640
53	417.044	35.3286	16.6809	5	2689
54	417.005	35.474	16.6166	5	2738
55	416.802	35.6853	16.7372	5	2787
56	417.328	35.1536	16.8907	5	2840
57	416.791	34.9857	16.9892	5	2890
58	417.085	34.6948	17.1316	5	2939
59	416.579	34.742	17.1524	5	2989
60	417.252	34.6317	17.2415	5	3037
61	417.215	34.8092	17.2813	5	3086
62	417.047	34.6879	17.2227	5	3135
63	417.333	34.5161	17.232	5	3184
64	417.214	34.2366	17.4206	5	3235
65	416.702	34.5254	16.906	5	3282
66	417.355	34.5259	16.9722	5	3328
67	419.095	33.9206	17.2817	5	3373
68	418.721	34.0817	17.3338	5	3422
69	418.616	34.4634	17.4345	5	3469
70	418.115	34.9914	17.5869	5	3521
71	418.169	34.9509	17.7812	5	3571
72	418.813	34.9098	17.9511	5	3620
73	419.626	35.0469	18.1191	5	3671
74	419.996	34.9943	18.3432	5	3720
75	420.224	35.0243	18.2152	5	3770
76	420.264	35.1528	18.4035	5	3819
77	420.137	35.478	18.3806	5	3867
78	420.511	35.4521	18.5336	5	3916
79	420.454	35.6417	18.5974	5	3964
80	420.433	35.7795	18.5866	5	4014
81	420.724	35.8536	18.6185	5	4064
82	420.321	35.7922	18.8643	5	4114
83	419.719	35.92	18.9235	5	4162
84	419.405	35.8348	18.8942	5	4209
85	419.607	35.7266	18.8648	5	4257
86	420.186	35.4153	19.0118	5	4305
87	420.059	35.1169	19.084	5	4353
88	420.153	35.0756	19.0603	5	4400
89	419.505	35.267	18.9658	5	4448
90	420.352	35.0647	18.8442	5	4495
91	420.418	34.9084	18.8922	5	4540
92	420.509	34.8121	18.984	5	4586
93	420.602	34.3896	18.8496	5	4634
94	420.211	34.2236	19.0789	5	4682
95	419.787	34.6142	19.2278	5	4727
96	417.383	34.8444	19.2953	5	4774
98	417.31	35.083	19.241	5	4859
99	418.214	34.5688	19.4812	5	4902
100	418.043	34.6303	19.3476	5	4949
101	418.289	34.6035	19.453	5	4995
102	418.917	34.9989	19.3646	5	5038
103	418.771	34.8921	19.818	5	5080
104	417.156	34.6313	20.1096	5	5124
1	443.028	41.1698	13.8302	6	5
2	442.842	41.6036	13.7693	6	53
3	442.461	41.2078	13.8962	6	102
4	442.524	40.7238	13.9573	6	149
5	443.111	41.3164	14.0193	6	197
6	442.944	40.783	14.2612	6	273
7	442.29	40.3936	14.363	6	322
8	442.501	40.648	14.3003	6	370
9	442.564	41.0779	14.4801	6	419
10	441.988	41.1638	14.9206	6	468
11	442.367	40.983	15.113	6	516
12	442.52	41.0051	15.1034	6	568
13	441.965	40.8069	15.1782	6	620
14	441.759	40.3708	14.9407	6	670
15	441.195	40.1919	15.1936	6	723
16	442.621	41.2261	14.9578	6	776
17	443.042	41.3813	14.8088	6	830
18	442.308	41.0585	15.3503	6	883
19	443.309	41.0324	14.9567	6	937
20	443.381	40.5865	14.7461	6	991
21	443.178	39.3574	14.6076	6	1045
22	442.439	40.2354	14.7027	6	1099
23	442.238	40.6116	15.1259	6	1153
24	442.903	40.6538	14.9994	6	1206
25	442.735	40.7026	15.1603	6	1259
26	443.018	41.2004	15.0145	6	1313
27	442.109	39.8686	15.0048	6	1368
28	442.682	40.4568	15.4405	6	1424
29	443.064	40.0622	15.6111	6	1477
30	443.286	41.4332	16.0851	6	1528
31	443.216	42.3693	16.0732	6	1584
32	442.342	41.7636	16.0393	6	1636
33	442.561	40.6546	15.9734	6	1690
34	444.264	42.2775	16.069	6	1741
35	444.359	42.6829	15.9454	6	1794
36	444.516	42.7965	16.2235	6	1846
37	445.079	42.9793	16.15	6	1895
38	445.453	42.746	16.2785	6	1943
39	445.783	42.6971	16.2869	6	1993
40	446.532	43.5048	16.4139	6	2045
41	446.591	43.7996	16.4042	6	2095
42	446.257	43.6622	16.4151	6	2144
43	445.52	42.9165	16.8964	6	2200
44	445.374	43.4294	16.9888	6	2250
45	445.058	42.8694	17.0558	6	2300
46	445.688	42.7659	16.7232	6	2343
47	445.623	42.3746	16.545	6	2393
48	445.289	42.2531	16.5352	6	2443
49	444.94	42.5959	16.6217	6	2493
50	444.256	42.0651	16.8567	6	2547
51	444.089	42.0456	16.7985	6	2594
52	443.944	41.965	16.9688	6	2644
53	444.144	41.8653	17.0973	6	2694
54	444.314	41.5012	16.9572	6	2742
55	444.335	41.7483	16.9618	6	2790
56	444.459	41.7009	17.0738	6	2841
57	444.508	42.038	17.3203	6	2891
58	444.505	41.3532	17.4514	6	2940
59	444.729	41.7809	17.3421	6	2990
60	444.762	41.4173	17.4769	6	3038
61	444.991	41.849	17.5057	6	3087
62	444.906	41.8496	17.2177	6	3136
63	444.73	41.4581	17.3211	6	3185
64	445.001	41.9135	17.4524	6	3236
65	444.806	41.6584	17.354	6	3283
66	444.362	41.0259	17.4038	6	3329
67	444.368	40.3943	17.539	6	3374
68	444.436	40.8134	17.6511	6	3423
69	443.984	40.8322	17.5985	6	3470
70	444.235	41.0469	17.7132	6	3522
71	444.452	41.3543	17.9684	6	3572
72	444.399	41.5825	17.9886	6	3621
73	444.619	41.264	18.4427	6	3672
74	444.921	41.8485	18.6736	6	3721
75	444.918	41.9023	18.44	6	3771
76	445.293	42.3221	18.4363	6	3820
77	444.827	42.9507	18.5126	6	3868
78	444.889	42.8625	18.8109	6	3917
79	444.364	42.9196	19.1203	6	3965
80	444.741	42.3951	18.9292	6	4015
81	444.566	42.0303	19.1055	6	4065
82	445.436	42.6142	18.8484	6	4115
83	445.521	42.3113	18.9757	6	4163
84	445.521	42.6155	18.9492	6	4210
85	445.5	42.4696	18.9869	6	4258
86	445.408	41.9516	19.2239	6	4306
87	444.854	41.7644	19.5952	6	4357
88	444.524	41.3439	19.5843	6	4404
89	444.68	41.3256	19.3417	6	4451
90	444.486	42.0623	19.2435	6	4496
91	444.787	41.8974	19.0013	6	4541
92	444.483	41.2205	19.3884	6	4589
93	444.72	41.5619	19.1738	6	4635
94	443.656	40.6098	19.6176	6	4686
95	443.171	40.5311	19.9111	6	4731
96	444.255	41.7224	19.4161	6	4775
97	445.416	42.0074	19.0692	6	4816
98	444.911	40.978	19.5872	6	4863
99	444.991	40.7645	19.5101	6	4903
100	444.454	39.6475	19.7836	6	4950
101	443.586	38.7215	20.2739	6	4996
102	442.594	38.6299	20.2259	6	5039
103	442.714	38.7468	20.53	6	5081
104	443.29	39.751	20.3815	6	5125
105	444.95	40.7103	19.7005	6	5169
106	445.357	41.46	18.391	6	5214
1	456.885	96.6844	13.6115	7	6
2	456.876	96.6044	13.7708	7	54
3	456.96	96.7732	13.7375	7	103
4	456.612	97.1853	13.7766	7	150
5	456.538	97.1307	13.5519	7	198
6	456.378	97.0004	13.8126	7	246
7	456.41	96.8268	13.8942	7	294
8	456.445	96.7083	13.8663	7	342
9	456.68	96.3153	14.0815	7	391
10	456.775	96.1145	14.0868	7	440
11	456.55	96.1352	14.2657	7	517
12	456.509	95.6355	14.2128	7	538
13	456.179	96.2402	14.237	7	589
14	456.134	95.7965	14.5885	7	671
15	456.226	95.4237	14.4825	7	724
16	456.479	94.957	14.5505	7	777
17	456.668	94.9098	14.6356	7	831
18	456.329	95.1921	14.4849	7	884
19	456.191	95.4265	14.5009	7	938
20	456.227	94.7698	14.7844	7	992
21	456.283	94.538	14.9385	7	1046
22	456.335	94.3826	14.991	7	1100
23	456.91	93.4224	14.9987	7	1154
24	456.83	93.8691	15.0067	7	1207
25	456.697	94.0339	14.9002	7	1260
26	456.461	93.9093	14.9895	7	1314
27	456.24	93.9562	15.187	7	1369
28	456.333	94.0673	15.3293	7	1425
29	456.773	93.7118	15.4241	7	1478
30	456.923	94.2117	15.635	7	1529
31	457.08	94.8703	15.5415	7	1585
32	456.849	95.1972	15.5019	7	1637
33	457.047	95.0282	15.5889	7	1691
34	457.247	95.1652	15.8401	7	1742
35	457.306	95.2237	16.0683	7	1795
36	457.743	95.5776	16.1555	7	1847
37	458.045	95.1782	16.3635	7	1896
38	458.265	95.5292	16.4066	7	1944
39	458.446	95.7264	16.3285	7	1994
40	458.676	95.5748	16.3829	7	2046
41	458.828	95.0103	16.5495	7	2096
42	458.878	95.0242	16.6315	7	2145
43	459.2	94.8947	16.6636	7	2194
44	459.186	95.0336	16.7093	7	2244
45	459.215	95.2267	16.6462	7	2293
46	459.154	94.9432	16.5107	7	2344
47	458.972	94.6251	16.4527	7	2394
48	458.843	94.6429	16.5488	7	2444
49	458.929	94.695	16.6947	7	2494
50	458.901	94.6513	16.62	7	2542
51	458.84	94.7316	16.6719	7	2590
52	458.737	94.7434	16.7639	7	2645
53	458.765	94.3362	16.5495	7	2690
54	458.914	93.6771	16.7006	7	2739
55	458.896	93.4609	16.9809	7	2791
56	459.005	93.3767	16.9824	7	2842
57	459.518	93.484	17.007	7	2892
58	459.432	93.4914	17.0897	7	2941
59	459.522	93.349	17.0666	7	2991
60	459.468	93.1391	17.0986	7	3039
61	459.88	92.6743	17.1037	7	3088
62	459.793	92.4452	17.1747	7	3137
63	459.857	92.3561	17.1734	7	3186
64	459.974	92.6897	17.2859	7	3237
65	459.683	92.8006	17.027	7	3284
66	460.094	92.391	17.3777	7	3330
67	460.617	91.8122	17.3901	7	3375
68	461.177	91.3008	17.5979	7	3424
69	462.159	90.8904	17.5855	7	3471
70	462.633	91.1987	17.6664	7	3523
71	463.046	91.2733	17.8252	7	3573
72	463.155	91.4592	18.0091	7	3622
73	463.787	91.236	18.0619	7	3673
74	464.276	91.4335	18.2517	7	3722
75	464.565	91.4679	18.1917	7	3772
76	464.563	91.589	18.3853	7	3821
77	464.942	91.6179	18.5773	7	3869
78	465.235	91.8842	18.5698	7	3918
79	465.006	91.9555	18.7199	7	3966
80	465.318	92.1839	18.6218	7	4016
81	465.422	92.0079	18.4545	7	4066
82	465.542	91.7095	18.7616	7	4116
83	465.46	91.7464	18.8868	7	4164
84	465.34	91.8548	18.7763	7	4211
85	465.751	91.6966	18.6981	7	4259
86	466.162	91.5946	18.8363	7	4307
87	465.954	91.1188	18.6303	7	4354
88	465.433	91.4353	18.5441	7	4401
89	465.064	91.1837	18.6702	7	4449
90	465.306	91.0673	18.6411	7	4497
91	465.478	91.0738	18.6662	7	4542
92	465.585	91.1019	18.59	7	4587
93	465.721	91.0878	18.7318	7	4636
94	465.797	90.8522	18.6864	7	4683
95	465.472	90.7207	18.8923	7	4728
96	465.42	90.5944	18.8957	7	4772
97	465.361	90.4706	18.9122	7	4817
98	465.293	90.5135	19.2205	7	4860
99	465.319	90.4394	19.3219	7	4904
100	465.707	90.3523	19.1722	7	4946
101	465.536	90.3903	19.1178	7	4992
102	464.961	90.3811	19.1955	7	5036
103	464.716	90.407	19.4521	7	5082
104	464.768	90.4355	19.6763	7	5126
105	464.64	90.6948	19.8415	7	5170
106	464.653	91.0559	18.8543	7	5215
1	318.1	173.733	12.716	8	7
2	318.276	173.351	12.3905	8	55
4	317.8	173.402	12.3758	8	151
5	324.004	176.184	13.5838	8	199
6	317.883	173.156	12.4273	8	247
7	317.994	173.091	12.6908	8	295
8	318.204	173.005	12.7216	8	343
9	318.061	172.73	12.892	8	392
10	323.28	175.474	14.3888	8	441
11	317.615	172.32	13.0193	8	488
12	317.559	171.849	12.9475	8	539
13	317.569	171.654	12.7183	8	590
14	317.47	171.873	13.1414	8	641
15	317.706	171.989	13.4823	8	694
16	317.266	171.277	13.0159	8	747
17	316.948	171.214	12.6626	8	802
18	316.486	170.586	12.4352	8	853
19	316.202	170.523	12.427	8	907
20	316.245	170.543	12.6107	8	960
21	316.271	170.261	13.0712	8	1015
22	316.573	170.258	12.8397	8	1069
23	316.335	170.036	12.8681	8	1122
24	316.195	170.154	12.9688	8	1177
25	316.384	170.163	13.0087	8	1231
26	316.112	170.243	13.0541	8	1285
27	316.27	170.527	13.3583	8	1339
28	316.374	170.259	13.3516	8	1396
29	316.204	170.317	13.4887	8	1451
30	316.496	170.415	13.9817	8	1503
31	316.711	171.019	13.5329	8	1558
32	316.613	171.021	13.7263	8	1609
33	317.028	171.732	13.77	8	1664
34	317.119	171.97	14.1751	8	1716
35	317.415	172.444	14.4755	8	1796
36	317.678	172.792	14.3929	8	1848
37	317.959	173.381	14.5428	8	1897
38	318.116	174.013	14.4459	8	1945
39	318.183	173.995	14.3895	8	1995
40	318.404	173.929	14.7472	8	2047
41	318.532	174.114	14.862	8	2097
42	318.799	174.512	15.0255	8	2146
43	318.8	174.982	14.8889	8	2195
44	318.413	174.085	14.765	8	2245
45	318.23	174.124	14.8061	8	2294
46	318.3	174.391	14.7948	8	2345
47	318.483	175.095	14.8296	8	2395
48	318.487	174.869	14.908	8	2445
49	318.159	174.073	15.0592	8	2495
50	318.172	173.818	14.9449	8	2543
51	318.208	174.003	14.8958	8	2591
52	318.241	174.045	14.9114	8	2641
53	317.97	173.205	15.264	8	2691
54	318.091	172.916	15.4904	8	2740
55	318.231	172.947	15.6534	8	2788
56	318.263	172.36	15.7238	8	2838
57	318.163	172.367	15.6655	8	2886
58	317.945	172.085	15.6616	8	2936
59	317.948	171.746	15.9142	8	2985
60	317.779	171.606	16.0555	8	3034
61	317.336	171.218	15.9241	8	3083
62	317.535	171.279	16.1114	8	3132
63	317.833	171.573	16.41	8	3181
64	317.604	171.042	16.2867	8	3231
65	317.272	170.877	16.3251	8	3279
66	317.019	170.314	16.3714	8	3325
67	317.618	169.966	17.6606	8	3377
68	317.298	170.855	16.6338	8	3419
69	317.555	171.061	16.8123	8	3473
70	317.905	170.969	17.1685	8	3525
71	317.742	170.85	16.8917	8	3575
72	317.793	171.249	17.0069	8	3623
73	317.821	171.312	17.4417	8	3675
74	317.981	171.71	17.7807	8	3724
75	317.955	172.177	17.695	8	3774
76	318.348	172.497	17.9386	8	3822
77	318.299	172.738	17.8231	8	3870
78	318.409	172.811	17.872	8	3919
79	318.517	172.891	17.8955	8	3967
80	318.359	172.31	17.9688	8	4017
81	318.241	172.279	17.8182	8	4067
82	318.741	172.912	18.4037	8	4117
83	318.813	172.863	18.5012	8	4165
84	318.792	172.824	18.4668	8	4212
85	318.623	172.571	18.4246	8	4260
86	318.374	172.352	18.5032	8	4308
87	318.446	172.53	18.2572	8	4355
88	318.457	172.375	17.9239	8	4402
89	317.381	172.01	17.1305	8	4450
90	317.584	171.846	17.028	8	4498
91	317.529	171.974	17.3026	8	4543
92	317.432	171.866	17.1494	8	4588
93	317.3	171.658	17.1727	8	4637
94	317.42	171.833	17.1428	8	4684
95	317.66	172.36	17.0706	8	4729
96	317.269	171.76	17.3614	8	4773
97	317.461	171.526	17.373	8	4818
98	317.574	171.179	17.4621	8	4861
99	317.344	171.022	17.7429	8	4901
100	317.343	170.889	17.4212	8	4947
101	317.504	170.799	17.5045	8	4993
102	317.35	171.027	17.6507	8	5037
103	317.267	170.82	17.9394	8	5079
104	317.25	170.853	18.1731	8	5123
105	317.343	170.664	18.1789	8	5168
106	317.512	170.932	17.3222	8	5217
1	262.51	208.586	12.3023	9	8
2	262.838	208.588	12.2732	9	56
3	262.641	208.526	12.2415	9	104
4	262.644	208.411	12.3384	9	152
5	262.732	208.417	12.2354	9	200
6	262.818	208.349	12.3295	9	248
7	262.797	208.386	12.4209	9	296
8	263.019	208.264	12.3413	9	344
9	262.672	208.245	12.643	9	393
10	262.599	208.168	12.8554	9	442
11	262.625	208.127	13.0674	9	489
12	262.105	208.134	13.1147	9	540
13	262.669	208.012	12.918	9	591
14	262.873	207.771	13.1986	9	642
15	263.006	207.756	12.9046	9	695
16	262.981	207.719	12.8568	9	748
17	262.744	207.745	13.3155	9	804
18	262.856	207.67	13.0769	9	854
19	263.113	207.565	13.305	9	908
20	263.144	207.465	13.2532	9	961
21	263.32	207.459	13.1287	9	1016
22	263.279	207.444	13.2253	9	1070
23	263.351	207.38	13.3606	9	1123
24	263.29	207.344	13.4522	9	1178
25	263.171	207.301	13.6338	9	1232
26	263.206	207.303	13.5324	9	1286
27	262.977	207.358	13.5639	9	1340
28	263.135	207.334	13.7838	9	1397
29	262.977	207.491	13.8494	9	1452
30	262.35	207.78	14.2996	9	1532
31	262.795	207.9	14.1845	9	1559
32	263.093	207.921	14.1497	9	1610
33	263.351	208.261	14.0802	9	1665
34	263.352	208.541	14.3055	9	1743
35	262.624	210.217	13.1224	9	1769
36	262.81	209.941	13.0692	9	1822
37	263.601	209.82	13.3351	9	1875
38	264.403	208.986	15.125	9	1947
39	264.323	209.117	15.0105	9	1997
40	264.678	209.214	15.1955	9	2048
41	264.711	209.489	15.178	9	2098
42	264.307	209.477	15.3375	9	2147
43	264.341	209.471	15.0982	9	2196
44	264.947	209.488	14.7933	9	2246
45	265.35	209.368	14.8327	9	2296
46	264.87	209.46	15.0544	9	2347
47	265.201	209.37	14.7296	9	2396
48	264.871	209.35	14.8829	9	2446
49	264.816	209.37	15.0523	9	2496
50	264.73	209.133	14.896	9	2545
51	264.86	209.098	14.7675	9	2593
52	264.916	209.026	15.0153	9	2643
53	264.615	208.868	15.5134	9	2693
54	264.523	208.962	15.2272	9	2741
55	264.934	208.746	15.0516	9	2789
56	264.399	208.656	15.5693	9	2839
57	264.248	208.577	15.7334	9	2887
58	265.345	208.371	15.3183	9	2937
59	264.353	208.453	15.7073	9	2987
60	264.405	208.444	15.8026	9	3035
61	264.306	208.445	15.8678	9	3084
62	264.029	208.479	15.899	9	3133
63	264.15	208.405	15.9234	9	3182
64	263.795	208.386	15.8816	9	3233
65	263.64	208.667	15.1116	9	3280
66	264.145	208.337	15.9198	9	3326
67	263.957	208.298	16.0817	9	3371
68	264.545	208.251	16.0836	9	3420
69	264.821	208.386	16.1036	9	3467
70	265.013	208.667	16.0212	9	3519
1	159.09	327.759	5.5	10	9
2	159.842	327.327	5.5	10	58
3	160.867	333.603	5.5	10	106
4	159.987	327.09	5.5	10	153
5	158.743	325.488	5.5	10	201
6	159.809	325.71	5.5	10	251
7	158.991	326.673	5.5	10	300
8	159.598	325.752	5.5	10	347
9	159.065	326.342	5.5	10	396
10	158.572	326.694	5.5	10	444
11	159.691	324.821	5.5	10	491
12	158.862	325.607	5.5	10	542
13	159.914	325.435	5.5	10	593
14	159.592	324.733	5.5	10	644
15	160.379	324.09	5.5	10	698
16	159.446	324.5	5.5	10	750
17	160.052	324.129	5.5	10	806
18	160.373	323.467	5.5	10	857
19	160.249	322.027	5.5	10	911
20	159.946	322.264	5.5	10	964
21	159.76	323.785	5.5	10	1018
22	159.424	323.029	5.5	10	1072
23	159.034	324.333	5.5	10	1126
24	158.995	325.516	5.5	10	1181
26	159.86	322.266	5.5	10	1289
27	159.199	323.364	5.5	10	1343
28	158.173	325.885	5.5	10	1400
29	158.716	334.03	5.5	10	1455
30	161.625	339.605	5.5	10	1508
31	161.499	339.725	5.5	10	1564
32	162.005	340.344	5.5	10	1615
33	162.43	340.963	5.5	10	1670
34	162.007	341.023	5.5	10	1721
35	161.999	340.308	5.5	10	1773
36	161.736	340.963	5.5	10	1826
37	160.745	333.964	5.5	10	1877
38	159.682	326.876	5.5	10	1925
40	160.041	326.408	5.5	10	2026
41	159.845	327.597	5.5	10	2077
42	160.452	326.978	6.89077	10	2127
43	160.157	326.953	7.02602	10	2177
44	160.397	327.937	6.96302	10	2227
45	161.159	326.343	6.78686	10	2277
1	141.824	332.337	5.5	11	10
2	142.018	331.763	5.5	11	59
3	140.996	332.649	5.5	11	107
4	141.435	332.053	5.5	11	154
5	142.268	331.929	5.5	11	202
6	143.022	331.381	5.5	11	252
7	142.938	331.883	5.5	11	301
8	142.409	331.751	5.5	11	348
9	142.488	330.299	5.5	11	397
10	142.297	330.948	5.5	11	445
11	141.388	331.21	5.5	11	492
12	142.235	331.461	5.5	11	543
13	142.128	331.821	5.5	11	594
14	141.685	331.682	5.5	11	645
15	141.205	331.695	5.5	11	699
16	141.203	331.899	5.5	11	751
17	141.183	331.715	5.5	11	807
18	141.641	330.412	5.5	11	858
19	142.022	331.246	5.5	11	912
20	142.133	331.507	5.5	11	965
21	142.444	330.652	5.5	11	1019
22	142.121	331.335	5.5	11	1073
23	142.733	330.588	5.5	11	1127
24	141.819	330.755	5.5	11	1182
25	142.643	330.821	5.5	11	1235
26	142.413	331.71	5.5	11	1290
27	142.335	331.945	5.5	11	1344
28	142.727	330.282	5.5	11	1401
29	141.976	330.713	5.5	11	1456
30	141.186	331.581	5.5	11	1507
31	142.85	331.13	5.5	11	1563
32	143.611	331.35	5.5	11	1614
33	142.171	332.61	5.5	11	1669
34	142.901	330.954	5.5	11	1720
35	142.219	332.343	5.5	11	1772
36	142.396	332.136	5.5	11	1825
37	142.351	331.926	5.5	11	1878
38	142.488	332.721	6.87215	11	1926
39	142.777	332.279	7.12736	11	1976
40	144.013	339.417	8.28172	11	2027
41	143.994	332.361	7.39986	11	2078
42	143.665	332.964	7.40591	11	2128
43	143.779	331.969	7.50308	11	2178
44	143.302	332.262	7.71193	11	2228
45	143.092	331.979	7.5757	11	2278
46	142.252	334.135	8.49888	11	2328
47	142.605	334.131	8.578	11	2377
48	142.265	333.789	8.06003	11	2427
49	142.991	332.865	8.58783	11	2476
50	143.49	332.414	8.1226	11	2527
51	142.706	332.767	7.87123	11	2575
52	142.462	333.03	8.61	11	2624
53	142.158	332.913	9.27177	11	2674
54	142.519	332.317	9.4071	11	2725
55	142.609	332.392	9.63445	11	2773
56	142.501	332.636	9.96865	11	2822
57	143.021	332.39	10.21	11	2869
58	142.19	332.962	10.4752	11	2919
59	142.386	332.618	10.0777	11	2968
60	142.293	332.372	10.0208	11	3019
61	142.372	332.544	10.3443	11	3069
62	142.358	331.639	10.2533	11	3118
63	142.902	332.469	10.4908	11	3167
64	142.016	332.209	10.4096	11	3215
65	142.565	333.305	10.2522	11	3265
66	142.409	333.4	10.1527	11	3312
67	142.925	339.418	11.5497	11	3357
68	142.668	338.994	11.6654	11	3404
69	142.696	332.936	11.0131	11	3451
70	143.341	333.29	10.7949	11	3503
71	142.736	332.919	10.7038	11	3554
72	143.084	333.338	10.879	11	3604
73	143.072	333.421	11.1061	11	3653
74	143.385	333.281	11.4792	11	3703
75	143.008	333.124	11.5448	11	3753
76	143.513	333.887	11.7377	11	3804
77	143.787	334.091	11.8086	11	3855
78	144.107	333.971	11.6678	11	3899
79	144.305	333.81	11.7245	11	3949
80	144.12	333.938	11.5733	11	3998
81	144.581	333.686	11.6063	11	4048
82	144.615	333.843	11.5573	11	4098
83	144.792	333.429	11.4865	11	4147
84	144.453	333.489	11.5609	11	4195
85	144.304	333.719	11.4305	11	4244
86	144.476	333.427	11.4124	11	4292
87	144.235	333.513	11.4856	11	4339
88	143.515	333.64	11.6651	11	4386
89	144.184	333.252	11.894	11	4437
90	144.36	333.839	11.6903	11	4481
91	144.231	332.925	11.4769	11	4528
92	144.066	333.54	11.7819	11	4577
93	143.828	332.992	11.7497	11	4621
94	144.019	332.817	11.8648	11	4671
95	144.162	332.533	11.9571	11	4718
96	144.731	332.329	11.9632	11	4762
97	144.944	332.467	12.0667	11	4807
98	144.471	332.42	11.7443	11	4849
99	145.081	332.071	12.082	11	4894
100	144.299	332.667	12.5366	11	4939
101	144.207	332.814	12.4599	11	4984
102	144.446	332.66	12.459	11	5028
103	145.384	332.413	12.6466	11	5071
104	144.985	332.367	12.8539	11	5115
105	144.482	332.702	13.1829	11	5159
106	144.503	332.996	13.1449	11	5201
1	204.274	337.027	5.5	12	11
2	204.105	336.256	5.5	12	60
3	204.458	336.739	5.5	12	108
4	204.709	335.741	5.5	12	155
5	204.717	335.454	5.5	12	203
6	204.147	335.486	5.5	12	253
7	204.729	330.72	5.5	12	299
8	204.855	335.715	5.5	12	349
9	204.595	335.77	5.5	12	398
10	204.125	334.688	5.5	12	446
11	204.017	334.248	5.5	12	493
12	203.55	334.895	5.5	12	544
13	204.593	335.786	5.5	12	595
14	204.158	330.137	6.36201	12	646
15	204.379	335.148	5.5	12	700
16	204.509	334.12	5.5	12	752
17	203.511	329.491	6.9091	12	808
18	203.485	329.985	6.56527	12	859
19	202.721	325.33	8.0231	12	920
20	203.415	330.005	6.55735	12	966
21	202.828	326.642	8.50196	12	1025
22	202.781	326.846	8.94412	12	1079
23	202.439	326.427	9.69408	12	1136
24	202.332	325.748	9.48824	12	1190
25	202.459	325.688	9.39142	12	1243
26	202.905	329.651	7.50921	12	1291
27	202.189	325.572	9.83337	12	1353
28	202.258	325.659	10.0208	12	1409
29	202.483	325.952	10.3568	12	1461
30	202.555	326.788	10.8608	12	1511
31	202.87	327.77	10.9562	12	1568
32	202.989	327.611	10.3424	12	1620
33	203.344	328.503	10.7114	12	1674
34	202.813	326.488	10.977	12	1725
35	203.106	326.537	11.1332	12	1777
36	203.721	328.162	10.8865	12	1829
37	203.515	327.135	11.2548	12	1881
38	204.198	326.532	10.9163	12	1929
39	204.353	327.42	10.8445	12	1980
40	204.308	327.077	11.2504	12	2032
41	204.141	325.872	11.7836	12	2087
42	204.372	326.813	11.7891	12	2134
43	204.553	327.06	12.0278	12	2184
44	205.474	327.815	11.7701	12	2234
45	205.831	329.954	10.9509	12	2280
46	205.539	328.533	10.8275	12	2330
47	205.869	332.9	10.0598	12	2379
48	205.969	333.586	9.95797	12	2430
49	206.135	332.405	10.2374	12	2479
50	205.569	333.112	10.1634	12	2530
51	205.75	337.16	9.59135	12	2578
52	205.881	332.453	10.1694	12	2627
53	205.48	336.838	9.63864	12	2675
54	206.447	329.701	11.0785	12	2724
55	206.865	331.183	11.1668	12	2772
56	206.885	332.196	11.0787	12	2821
57	206.266	337.597	10.4562	12	2870
58	207.303	337.386	10.7626	12	2920
59	206.152	337.28	10.5032	12	2969
60	206.308	336.804	10.3367	12	3020
61	207.54	331.307	11.6037	12	3070
62	208.563	329.746	12.1532	12	3120
63	207.314	331.187	11.709	12	3168
64	207.584	331.45	11.6476	12	3216
65	206.782	331.436	11.49	12	3264
66	206.978	331.402	11.3188	12	3311
67	207.964	329.612	12.0014	12	3360
68	207.629	329.678	12.1838	12	3407
69	208.105	329.413	12.4188	12	3454
70	208.513	330.113	12.4134	12	3506
71	207.789	331.116	12.2283	12	3557
72	208.041	331.939	12.3057	12	3607
73	207.592	331.012	12.555	12	3658
74	208.004	330.71	12.8281	12	3708
75	208.43	331.722	12.9178	12	3758
76	208.95	333.038	12.8681	12	3807
77	208.672	333.288	13.0244	12	3854
78	208.977	333.311	13.0734	12	3904
79	208.889	331.975	13.249	12	3952
80	208.514	331.705	13.318	12	4001
81	209.02	330.88	13.5421	12	4051
82	211.158	331.487	14.205	12	4101
83	209.227	332.408	13.6506	12	4151
84	211.266	331.573	14.3377	12	4199
85	211.399	331.337	14.6812	12	4247
86	212.441	330.804	14.9581	12	4314
87	208.682	329.775	14.0069	12	4342
88	208.302	329.478	14.1868	12	4389
89	208.808	329.384	14.1993	12	4436
90	208.832	329.271	14.1403	12	4485
91	209.743	328.928	14.4193	12	4550
92	210.136	328.748	14.3859	12	4595
93	208.983	329.143	14.0077	12	4624
94	208.634	328.851	14.0744	12	4670
95	208.308	328.873	14.151	12	4717
96	209.823	328.864	14.3893	12	4782
97	210.657	328.946	14.6818	12	4824
98	211.677	329.212	15.0721	12	4868
99	210.962	327.699	14.8444	12	4909
100	210.556	328.391	15.0279	12	4955
101	210.686	328.455	15.0094	12	5001
102	211.356	328.758	15.2441	12	5045
103	209.614	328.127	14.8191	12	5088
104	210.279	328.206	15.209	12	5130
105	209.528	328.44	15.215	12	5172
106	209.448	328.4	15.0108	12	5221
1	161.958	341.452	5.5	13	12
2	162.096	340.643	5.5	13	61
4	162.226	340.77	5.5	13	156
5	162.384	341.182	5.5	13	204
6	162.967	341.238	5.5	13	254
7	163.793	341.122	5.5	13	302
8	163.584	340.762	5.5	13	350
9	162.794	340.884	5.5	13	399
10	163.082	341.116	5.5	13	447
11	162.294	340	5.5	13	494
12	162.36	340.891	5.5	13	545
13	162.525	341.145	5.5	13	596
14	162.283	340.374	5.5	13	647
15	161.517	339.264	5.5	13	701
16	161.522	339.957	5.5	13	753
17	161.388	339.063	5.5	13	809
18	160.695	338.96	5.5	13	860
19	160.93	338.115	5.5	13	913
20	161.144	339.458	5.5	13	967
21	161.598	339.412	5.5	13	1020
22	161.516	338.655	5.5	13	1074
23	161.664	339.144	5.5	13	1128
24	161.329	339.377	5.5	13	1183
25	161.335	338.714	5.5	13	1236
26	162.087	339.58	5.5	13	1292
27	161.868	339.135	5.5	13	1345
28	161.906	339.867	5.5	13	1402
30	158.249	325.073	5.5	13	1506
31	160.003	322.717	5.5	13	1562
32	158.944	325.519	5.5	13	1613
33	158.683	326.344	5.5	13	1668
34	159.175	326.518	5.5	13	1719
35	159.418	326.692	5.5	13	1771
36	159.016	326.079	5.5	13	1824
1	96.0069	362.603	5.5	14	13
2	95.76	362.145	5.5	14	62
3	95.5579	360.873	5.5	14	109
4	95.2076	360.108	5.5	14	157
5	95.5825	360.574	5.5	14	205
6	95.4873	360.803	5.5	14	255
7	95.179	360.183	5.5	14	303
8	95.2072	360.615	5.5	14	351
9	94.6124	359.791	5.5	14	400
10	94.916	359.967	5.5	14	448
11	94.9212	359.832	5.5	14	495
12	94.9473	360.191	5.5	14	546
13	94.7613	359.947	5.5	14	597
14	94.3644	359.282	5.5	14	648
15	94.023	359.203	5.5	14	702
16	94.0517	358.995	5.5	14	754
17	94.1636	359.171	5.5	14	810
18	94.3921	359.134	5.5	14	861
19	94.5152	359.366	5.5	14	914
20	95.2385	361.025	5.5	14	968
21	95.3104	360.489	5.5	14	1021
22	94.8354	359.682	5.5	14	1075
23	95.0287	359.763	5.5	14	1129
24	94.9215	359.766	5.5	14	1184
25	95.1174	359.852	5.5	14	1237
26	94.9303	359.458	5.5	14	1293
27	94.8008	359.242	5.5	14	1346
28	94.7417	359.157	5.5	14	1403
1	165.881	364.524	5.5	15	14
2	165.788	364.487	5.5	15	63
3	165.915	364.172	5.5	15	110
4	166.338	364.13	5.5	15	158
5	166.398	363.803	5.5	15	206
6	166.953	364.213	5.5	15	256
7	166.751	364.068	5.5	15	304
8	166.926	363.669	5.5	15	352
9	166.086	363.25	5.5	15	401
10	166.389	363.383	5.5	15	449
11	165.669	363.238	5.5	15	496
12	165.922	363.292	5.5	15	547
13	166.243	363.47	5.5	15	598
14	165.501	362.989	5.5	15	649
15	165.504	363.271	5.5	15	703
16	165.246	362.932	5.5	15	755
17	165.323	363.029	5.5	15	811
18	165.548	363.228	5.5	15	862
19	165.434	363.122	5.5	15	915
20	165.472	363.023	5.5	15	969
21	165.515	362.896	5.5	15	1022
22	165.425	362.395	5.5	15	1076
23	164.98	362.185	5.5	15	1130
24	165.196	362.263	5.5	15	1185
25	165.648	362.621	5.5	15	1238
26	165.474	362.567	5.5	15	1294
27	165.607	362.519	5.5	15	1347
28	165.2	362.266	5.5	15	1404
29	165.323	362.42	5.5	15	1457
30	165.477	362.327	5.5	15	1509
31	165.983	362.987	6.76101	15	1565
32	165.919	363.192	5.5	15	1616
33	166.796	363.551	5.5	15	1671
34	167.236	363.904	7.10457	15	1722
35	167.109	363.838	7.39365	15	1775
36	167.003	364.034	7.13679	15	1827
37	167.045	363.741	8.02446	15	1879
38	166.923	363.829	8.33774	15	1927
39	168.127	364.312	8.45315	15	1977
40	168.424	364.495	8.7457	15	2028
41	168.394	364.623	8.91643	15	2079
42	168.42	364.646	8.97476	15	2129
43	168.42	364.596	8.77954	15	2179
44	168.083	364.543	8.96895	15	2229
45	168.396	364.522	9.20661	15	2279
46	168.514	365.131	9.29213	15	2331
47	168.909	365.286	9.26933	15	2380
48	168.541	365.194	9.03659	15	2428
49	168.196	364.931	9.00917	15	2477
50	168.039	364.493	9.08674	15	2528
51	168.18	364.456	9.19691	15	2576
52	168.463	364.546	9.56361	15	2628
53	168.623	364.662	9.56471	15	2676
54	168.708	364.638	9.59603	15	2726
55	168.689	364.484	9.73049	15	2774
56	168.326	364.185	9.56778	15	2823
57	168.495	364.267	9.81416	15	2871
58	168.487	364.061	9.99339	15	2921
59	168.506	364.036	10.0302	15	2970
60	168.565	364.095	10.0662	15	3021
61	169.108	364.377	10.1983	15	3071
62	169.255	364.336	10.162	15	3119
63	169.287	364.334	10.1767	15	3169
64	168.422	363.921	10.1956	15	3217
65	169.003	364.303	10.3099	15	3266
66	168.951	364.319	10.3247	15	3313
67	169.47	364.406	10.5052	15	3358
68	169.75	364.562	10.6653	15	3405
69	169.237	364.184	10.6798	15	3452
70	169.626	364.558	10.6667	15	3504
71	169.619	364.824	10.7816	15	3555
72	169.448	364.541	11.1087	15	3605
73	169.734	365.181	11.3711	15	3655
74	169.728	365.208	11.6483	15	3705
75	170.284	365.505	11.5901	15	3755
76	170.161	365.784	11.5303	15	3805
77	169.868	365.81	11.6268	15	3852
78	169.999	365.977	11.6072	15	3901
79	169.979	366.027	11.9	15	3953
80	169.978	366.088	11.9718	15	4002
81	170.816	366.518	12.0423	15	4052
82	170.553	366.708	11.9715	15	4102
83	171.144	366.458	12.0833	15	4152
84	171.303	366.473	12.1515	15	4200
85	171.256	366.56	12.0804	15	4248
86	171.164	366.329	12.139	15	4295
87	171.545	366.652	12.2374	15	4343
88	170.99	366.531	12.1972	15	4390
89	169.154	366.428	11.8083	15	4438
90	168.314	366.19	11.6462	15	4482
91	167.874	365.961	11.6871	15	4529
92	167.775	365.84	11.6851	15	4575
93	169.354	365.634	11.9095	15	4625
94	171.481	366.166	12.3915	15	4672
95	170.518	365.873	12.2592	15	4719
96	167.768	365.015	11.9246	15	4763
97	167.328	364.735	11.9883	15	4808
98	167.017	364.494	12.012	15	4851
99	166.267	364.169	12.0817	15	4895
100	166.344	363.733	12.2661	15	4940
101	166.458	363.646	12.3064	15	4985
102	166.17	363.906	12.2453	15	5029
103	166.053	364.023	12.3661	15	5072
104	165.873	363.933	12.3646	15	5116
105	165.654	364.195	12.376	15	5160
106	165.481	363.663	12.4071	15	5202
1	102.701	411.454	5.5	16	15
2	102.523	411.169	5.5	16	64
3	102.758	411.149	5.5	16	111
4	102.778	410.291	5.5	16	159
5	103.196	410.545	5.5	16	207
6	102.765	410.275	5.5	16	257
7	102.677	410.124	5.5	16	305
8	102.765	410.151	5.5	16	353
9	98.3942	407.398	5.5	16	402
10	98.7107	407.835	5.5	16	450
11	102.734	410.228	5.5	16	497
12	98.5332	408.183	5.5	16	548
13	97.6336	408.179	5.5	16	599
14	102.228	411.243	5.5	16	650
15	101.979	411.188	5.5	16	704
16	96.2906	409.343	7.83139	16	756
17	93.5071	413.478	9.73165	16	812
18	101.783	410.778	5.5	16	863
19	101.459	410.685	5.5	16	916
20	96.4675	407.52	7.06162	16	973
21	101.354	410.867	6.90487	16	1026
22	96.7406	407.322	7.45031	16	1080
23	97.2224	407.328	8.13514	16	1133
24	97.1883	406.933	7.69867	16	1188
25	97.388	407.288	7.5603	16	1239
26	102.018	409.848	7.99514	16	1295
27	101.99	409.509	8.06542	16	1348
28	102.022	409.35	8.60737	16	1405
29	102.442	409.474	9.22106	16	1458
30	102.485	409.549	9.53718	16	1512
31	102.693	409.702	8.90936	16	1566
32	103.201	410.296	8.99444	16	1618
33	103.492	410.67	9.56073	16	1675
34	104.017	411.128	9.84205	16	1726
35	104.226	411.132	10.3111	16	1778
36	99.2453	408.211	10.0103	16	1830
37	99.2984	408.253	10.4411	16	1882
38	99.7798	408.751	10.513	16	1930
39	105.54	412.178	10.8382	16	1981
40	105.652	412.05	11.1116	16	2033
41	105.652	412.03	11.226	16	2081
42	98.8955	410.133	12.7501	16	2130
43	105.347	412.425	11.2242	16	2180
44	104.784	411.841	11.2424	16	2230
45	104.925	411.96	11.3308	16	2281
46	98.3251	410.956	12.5799	16	2332
47	98.4296	411.05	12.6274	16	2381
48	98.2589	411.203	12.5859	16	2431
49	104.829	411.621	11.4745	16	2480
1	123.97	423.631	5.5	17	16
2	123.51	424.408	5.5	17	65
3	123.99	423.652	5.5	17	112
4	124.018	423.288	5.5	17	160
5	124.008	423.051	5.5	17	208
6	124.445	422.79	5.5	17	258
7	124.552	422.702	5.5	17	306
8	124.477	422.417	5.5	17	354
9	124.945	421.266	5.5	17	403
10	124.886	421.492	5.5	17	451
11	125.035	421.567	5.5	17	498
12	124.275	421.976	5.5	17	549
13	125.072	420.828	5.5	17	600
14	124.545	421.584	5.5	17	651
15	124.613	421.439	5.5	17	705
16	124.494	421.258	5.5	17	757
17	124.448	421.41	5.5	17	813
18	124.446	421.556	5.5	17	864
19	123.521	422.33	7.24297	17	921
20	124.03	421.36	7.27121	17	974
21	124.1	421.113	8.06031	17	1027
22	123.967	421.208	8.17862	17	1081
23	124.054	421.378	8.50947	17	1134
24	123.422	422.293	8.65811	17	1189
25	123.997	421.607	8.86112	17	1240
26	124.167	421.153	8.62153	17	1296
27	124.569	420.777	8.60488	17	1349
28	124.668	420.809	8.93913	17	1406
29	122.87	422.09	9.72222	17	1462
30	122.358	423.26	10.2676	17	1513
31	122.787	423.325	10.2748	17	1569
32	121.317	425.284	10.7241	17	1621
33	124.289	422.339	10.6345	17	1676
34	124.233	422.455	11.0737	17	1727
35	125.447	421.826	10.8437	17	1779
36	124.21	423.003	10.4947	17	1831
37	124.451	423.625	11.1255	17	1883
38	123.883	424.027	11.2105	17	1931
39	123.976	424.173	11.215	17	1982
40	124.236	424.708	11.5623	17	2034
41	125.406	423.903	11.5411	17	2082
42	122.973	425.947	11.8601	17	2135
43	123.039	426.041	12.1619	17	2185
44	122.612	426.906	12.08	17	2235
45	122.552	426.898	12.0372	17	2284
46	122.751	426.841	12.105	17	2334
47	122.665	426.585	12.0354	17	2383
48	122.614	426.868	12.1214	17	2434
49	122.692	426.762	12.2364	17	2483
50	122.042	426.563	12.1461	17	2532
51	122.206	426.23	11.9903	17	2580
52	122.088	425.934	12.0453	17	2630
53	122.799	425.318	12.1255	17	2678
54	122.671	425.848	12.2812	17	2728
55	122.973	425.23	12.2129	17	2776
56	122.889	425.008	12.3468	17	2826
57	122.104	425.934	12.5932	17	2874
58	122.649	425.581	12.5001	17	2924
59	122.268	425.706	12.5912	17	2974
60	122.327	425.548	12.5504	17	3024
61	122.509	425.583	12.6256	17	3073
62	122.749	425.573	12.694	17	3122
63	122.782	425.021	12.6634	17	3171
64	122.429	425.322	12.7224	17	3220
65	122.265	425.229	12.6451	17	3268
66	122.252	425.076	12.7587	17	3316
67	123.177	424.554	12.8959	17	3362
68	123.466	424.426	13.0323	17	3410
69	123.738	424.75	13.0912	17	3457
70	123.024	425.186	13.3609	17	3509
71	123.088	425.298	13.4239	17	3560
72	123.472	425.576	13.6025	17	3610
73	123.735	425.704	13.6284	17	3661
74	124.128	425.459	13.8459	17	3711
75	124.348	425.498	13.8435	17	3761
76	124.632	425.723	13.9215	17	3810
77	124.257	426.139	14.1053	17	3858
78	124.22	426.227	14.1835	17	3907
79	123.929	426.484	14.3105	17	3974
80	125.182	425.862	14.0233	17	4005
81	124.629	426.617	14.1022	17	4055
82	125.259	425.917	14.1395	17	4105
83	125.322	425.829	14.1824	17	4154
84	124.461	426.513	14.3563	17	4218
85	124.298	426.502	14.3151	17	4267
86	125.044	425.622	14.0465	17	4297
87	125.079	425.414	14.0869	17	4345
88	124.846	425.374	14.0071	17	4392
89	124.806	425.264	14.0659	17	4440
90	124.896	425.142	14.0724	17	4487
91	123.971	426.175	14.3367	17	4551
92	124.231	425.794	14.342	17	4597
93	123.472	426.294	14.3547	17	4644
94	124.416	425.362	14.248	17	4674
95	124.243	425.476	14.3418	17	4737
96	124.153	425.412	14.3605	17	4783
97	124.216	425.318	14.3938	17	4826
98	124.05	425.241	14.5125	17	4869
99	123.909	425.18	14.6174	17	4911
100	123.633	425.89	14.6316	17	4957
101	123.742	425.717	14.6406	17	5002
102	123.956	424.979	14.6384	17	5046
103	123.946	424.966	14.7795	17	5089
104	124.558	424.89	14.967	17	5131
105	124.589	424.867	15.0421	17	5173
106	124.593	424.596	14.8995	17	5222
1	110.442	441.66	5.5	18	17
2	110.813	441.668	5.5	18	66
3	110.898	441.514	5.5	18	113
4	110.764	442.23	5.5	18	161
5	110.368	442.043	5.5	18	209
6	110.386	441.774	5.5	18	259
7	110.137	441.917	5.5	18	307
8	110.3	441.376	6.81736	18	356
9	110.224	441.493	6.94116	18	405
10	110.525	440.992	7.09365	18	454
11	110.723	440.427	7.56024	18	502
12	110.594	440.636	7.68659	18	552
13	110.721	440.993	7.79024	18	603
14	110.69	440.947	8.1102	18	654
15	110.522	440.689	8.05485	18	707
16	110.867	440.06	8.16232	18	760
17	110.789	440.425	8.30267	18	816
18	110.587	440.087	8.49349	18	868
19	110.52	440.031	8.79189	18	922
20	110.207	440.263	9.33276	18	976
21	109.927	440.305	9.4482	18	1030
22	109.745	440.32	9.53754	18	1084
23	109.773	440.398	9.62783	18	1138
24	109.61	440.742	9.52521	18	1192
25	109.632	440.911	9.74847	18	1245
26	109.755	440.663	9.73205	18	1300
27	109.893	440.388	9.7914	18	1355
28	109.805	440.636	9.83511	18	1411
29	110.011	440.692	10.2769	18	1464
30	110.654	440.448	10.227	18	1515
31	111.103	440.313	10.262	18	1571
32	111.055	440.415	10.1136	18	1623
33	111.14	440.681	10.3308	18	1678
34	111.353	441.472	10.3967	18	1728
35	111.269	442.229	10.8045	18	1780
36	110.977	442.697	10.8119	18	1832
37	111.446	442.192	11.2674	18	1884
38	111.999	442.063	11.3198	18	1932
39	112.469	442.385	11.2347	18	1983
40	112.766	442.525	11.5088	18	2035
41	112.681	443.22	11.6176	18	2083
42	112.664	443.117	11.5566	18	2131
43	112.614	442.984	11.6601	18	2181
44	112.736	443.186	11.5615	18	2231
45	113.019	442.529	11.5262	18	2282
46	113.009	442.347	11.6031	18	2333
47	113.067	442.535	11.6748	18	2382
48	112.966	442.613	11.6624	18	2432
49	112.495	443.051	11.7135	18	2481
50	112.422	442.98	11.7111	18	2531
51	112.475	443.086	11.5751	18	2579
52	112.553	442.302	11.7775	18	2632
53	112.428	442.276	11.8126	18	2680
54	112.446	441.989	11.9138	18	2730
55	112.656	442.008	12.0174	18	2778
56	112.861	441.6	12.0975	18	2828
57	112.95	441.554	12.2161	18	2876
58	112.681	441.896	12.2657	18	2926
59	112.569	441.945	12.2679	18	2976
60	112.511	441.927	12.2592	18	3026
61	112.606	441.801	12.3023	18	3075
62	112.374	441.808	12.2889	18	3124
63	112.43	441.81	12.4283	18	3173
64	112.255	441.591	12.437	18	3222
65	112.456	441.585	12.2791	18	3270
66	112.247	441.354	12.5184	18	3317
67	112.516	441.251	12.7057	18	3363
68	112.518	441.438	12.8292	18	3411
69	112.667	441.635	12.8884	18	3458
70	112.933	441.551	12.9575	18	3510
71	113.039	441.776	13.0854	18	3561
72	113.144	442.13	13.2713	18	3611
73	113.256	442.361	13.4282	18	3662
74	113.388	442.264	13.6519	18	3712
75	113.647	442.762	13.6667	18	3762
76	113.524	442.881	13.7706	18	3811
77	113.69	443.027	13.7853	18	3859
78	113.583	443.213	13.8663	18	3908
79	113.841	443.129	13.9775	18	3956
80	113.96	443.242	13.9222	18	4006
81	113.926	443.485	13.9182	18	4056
82	114.107	443.414	13.976	18	4106
83	114.201	443.185	14.0505	18	4155
84	114.141	443.302	14.1281	18	4202
85	114.126	443.135	14.0731	18	4250
86	113.987	443.1	14.0811	18	4298
87	114.151	442.828	14.0069	18	4346
88	114.196	442.842	13.9379	18	4393
89	114.24	442.606	14.024	18	4441
90	114.203	442.798	13.8824	18	4488
91	113.891	442.955	13.9763	18	4533
92	114.058	442.678	13.984	18	4579
93	114.011	442.589	14.0339	18	4627
94	113.911	442.291	14.094	18	4675
95	114.569	442.557	14.1422	18	4720
96	114.455	442.667	14.1637	18	4765
97	114.256	442.421	14.0857	18	4809
98	114.385	442.565	14.2264	18	4852
99	114.325	442.344	14.4107	18	4912
100	114.331	442.25	14.417	18	4958
101	114.662	442.07	14.4419	18	5003
102	114.387	442.183	14.4881	18	5047
103	114.438	441.96	14.6502	18	5090
104	114.565	442.112	14.8434	18	5132
105	114.759	442.119	14.8623	18	5174
106	114.396	442.09	14.9372	18	5223
1	104.247	460.177	5.5	19	18
2	104.036	460.109	5.5	19	67
3	103.75	459.974	7.102	19	116
4	104.223	459.553	7.33457	19	165
5	104.099	458.747	7.49008	19	213
6	104.402	456.89	8.40772	19	260
7	103.796	458.307	8.05113	19	309
8	103.377	459.576	7.81699	19	357
9	103.28	459.515	7.46464	19	406
10	103.19	460.051	7.65427	19	455
11	103.306	460.493	7.74895	19	503
12	103.301	460.306	7.59977	19	553
13	103.258	459.992	7.83175	19	604
14	103.32	459.983	8.06198	19	655
15	103.48	459.81	8.80488	19	708
16	103.727	459.629	8.577	19	761
17	103.665	459.841	8.83965	19	817
18	103.465	459.549	8.91821	19	869
19	103.311	459.638	9.10162	19	923
20	102.795	459.973	9.50232	19	977
21	102.791	459.883	9.78179	19	1031
22	102.739	459.806	10.0571	19	1085
23	102.814	459.907	10.1549	19	1139
24	103.024	459.585	9.93813	19	1193
25	102.973	459.287	10.1563	19	1246
26	103.048	459.374	10.2334	19	1301
27	102.333	460.04	10.1905	19	1356
28	102.322	460.34	10.4092	19	1412
29	102.589	460.311	10.7918	19	1465
30	102.796	460.477	11.0016	19	1516
31	103.074	460.371	11.0787	19	1572
32	103.367	460.146	10.9049	19	1624
33	104.268	458.801	11.2596	19	1679
34	104.438	459.262	11.2719	19	1729
35	103.572	460.353	11.8613	19	1784
36	103.336	460.91	11.7899	19	1836
37	103.465	461.327	12.1308	19	1887
38	103.488	461.866	12.3474	19	1935
39	103.809	461.893	12.1141	19	1985
40	104.379	461.811	12.4067	19	2038
41	104.468	461.735	12.5067	19	2089
42	104.32	462.147	12.4974	19	2137
43	104.365	462.419	12.5165	19	2187
44	104.255	461.946	12.4702	19	2237
45	104.314	462.131	12.4816	19	2286
46	104.833	461.32	12.6174	19	2336
47	104.7	461.423	12.4794	19	2385
48	104.035	461.925	12.3204	19	2436
49	103.687	462.021	12.5764	19	2485
50	103.68	461.859	12.5102	19	2534
51	103.372	461.981	12.4622	19	2582
52	103.683	461.803	12.6062	19	2633
53	104.18	461.286	12.4996	19	2682
54	103.657	461.739	12.5976	19	2731
55	104.147	461.243	12.7121	19	2779
56	104.203	460.972	12.8675	19	2830
57	104.34	461.022	13.0179	19	2878
58	104.425	460.8	13.2398	19	2928
59	104.269	461.038	13.1457	19	2977
60	104.533	461.043	13.109	19	3027
61	104.281	461.178	13.1141	19	3076
62	104.058	461.304	13.1182	19	3125
63	104.136	461.319	13.154	19	3174
64	104.18	461.245	13.2483	19	3223
65	104.523	460.672	12.9791	19	3271
66	104.593	460.175	13.2651	19	3318
67	104.694	460.326	13.4269	19	3364
68	104.752	460.294	13.4718	19	3412
69	104.641	460.811	13.5121	19	3459
70	104.784	461.072	13.761	19	3511
71	104.936	460.852	13.9195	19	3562
72	105.485	461.329	13.9901	19	3612
73	105.88	461.133	14.0748	19	3663
74	105.967	461.547	14.2845	19	3731
75	105.483	462.26	14.4069	19	3781
76	105.762	462.289	14.5982	19	3830
77	105.402	462.458	14.6682	19	3877
78	104.936	463.02	14.7441	19	3927
79	105.183	462.929	14.8756	19	3975
80	105.405	463.114	14.8659	19	4025
81	105.285	463.269	14.7867	19	4075
82	105.312	463.424	14.7946	19	4125
83	105.547	463.32	14.9263	19	4172
84	105.495	463.189	14.9844	19	4219
85	105.357	463.223	15.0232	19	4268
86	105.48	463.005	15.0781	19	4316
87	105.531	462.994	14.9984	19	4363
88	105.421	462.891	14.8867	19	4411
89	105.118	462.825	14.9496	19	4459
90	105.385	462.916	14.9488	19	4505
91	105.437	462.735	14.981	19	4552
92	105.062	462.889	14.8723	19	4598
93	105.213	462.72	15.0987	19	4645
94	105.699	462.269	15.1023	19	4692
95	105.903	461.978	15.1632	19	4738
96	105.559	462.466	15.1075	19	4784
97	105.549	462.477	15.0373	19	4827
98	105.607	462.552	15.14	19	4870
99	105.613	462.556	15.379	19	4913
100	105.617	462.469	15.3235	19	4959
101	105.746	462.274	15.3933	19	5004
102	105.344	461.991	15.4046	19	5048
103	105.432	461.847	15.5586	19	5091
104	105.556	461.615	15.6642	19	5133
105	105.247	461.369	15.7611	19	5175
106	105.019	461.399	15.6079	19	5224
1	136.86	460.987	5.5	20	19
2	135.067	456.061	6.2465	20	68
3	135.112	456.338	6.28359	20	114
4	134.958	455.688	6.39828	20	162
5	132.012	450.031	7.81641	20	212
7	130.664	450.159	5.5	20	308
8	130.438	450.052	5.5	20	355
9	135.354	456.349	6.47778	20	404
10	138.295	461.366	5.5	20	452
11	137.933	460.868	5.5	20	499
12	139.298	461.182	7.59981	20	554
13	138.365	461.034	6.80989	20	605
14	138.553	461.265	6.94609	20	656
15	138.961	462.012	8.12023	20	709
16	137.755	461.342	7.93975	20	762
17	132.701	458.698	11.5225	20	818
18	134.807	458.842	5.5	20	865
19	133.827	458.394	5.5	20	917
20	133.831	458.069	5.5	20	970
21	133.554	457.144	5.5	20	1023
22	133.119	456.313	6.98394	20	1082
23	133.037	457.061	5.5	20	1131
24	132.762	457.107	5.5	20	1186
25	132.533	455.919	7.30501	20	1241
26	132.939	456.852	7.34023	20	1297
27	132.568	456.475	7.55496	20	1350
28	132.685	456.296	7.96641	20	1407
29	133.439	456.765	8.42058	20	1459
30	133.349	456.92	8.77581	20	1510
31	133.036	456.681	9.1576	20	1567
32	133.32	456.832	9.05523	20	1619
33	132.796	457.017	8.9665	20	1672
34	129.483	456.224	9.00948	20	1723
35	131.223	454.249	10.0742	20	1781
36	131.363	454.033	10.536	20	1833
37	132.111	451.837	11.2741	20	1885
38	134.928	452.293	11.5006	20	1933
1	218.683	256.946	7.56689	21	20
2	221.517	260.967	5.5	21	57
3	220.164	259.014	5.5	21	105
4	220.602	261.06	6.7724	21	163
5	219.849	261.28	7.10786	21	210
6	219.818	261.333	5.5	21	249
7	220.167	261.343	5.5	21	297
8	220.864	261.533	5.5	21	345
9	220.976	260.363	5.5	21	394
10	219.831	260.311	5.5	21	443
11	219.513	259.475	7.88206	21	500
12	219.842	261.016	7.96147	21	550
13	219.883	261.484	7.79354	21	601
14	219.998	261.345	8.12334	21	652
15	218.937	257.414	8.65867	21	706
16	219.714	258.231	8.47136	21	758
17	219.651	258.38	8.82904	21	814
18	219.455	259.273	8.9149	21	866
19	218.499	258.323	8.97694	21	918
20	219.005	259.335	9.04898	21	971
21	218.538	258.376	9.29467	21	1028
22	218.791	257.448	8.37907	21	1077
23	217.789	254.66	9.60638	21	1135
24	217.513	253.368	9.8302	21	1175
25	217.498	253.491	10.1525	21	1229
26	216.87	253.684	10.2366	21	1283
27	216.878	254.072	10.1371	21	1351
28	216.701	253.66	10.5544	21	1394
29	216.742	252.917	10.8184	21	1449
30	217.626	253.406	10.885	21	1501
31	217.596	252.44	11.0269	21	1555
1	243.191	266.414	7.25832	22	21
2	243.958	267.738	7.2883	22	69
3	247.754	266.619	8.93224	22	115
4	244.185	265.991	8.23076	22	164
5	242.971	266.781	6.80681	22	211
6	241.46	267.657	5.5	22	250
7	240.94	268.076	5.5	22	298
8	241.685	267.534	5.5	22	346
9	242.996	266.916	5.5	22	395
10	242.653	266.925	6.92259	22	453
11	241.719	267.388	6.77603	22	501
12	241.396	267.654	7.20601	22	551
13	241.286	267.21	7.20933	22	602
14	241.879	267.058	7.39134	22	653
15	241.867	267.597	5.5	22	696
16	241.994	267.424	6.86391	22	759
17	241.43	267.319	7.19331	22	815
18	241.269	267.197	7.73009	22	867
19	241.746	267.48	7.39824	22	919
20	241.702	267.558	7.73865	22	972
21	242.238	267.375	8.20973	22	1024
22	242.538	266.655	8.08161	22	1078
23	242.238	266.783	8.48232	22	1132
24	246.66	265.498	10.6379	22	1187
25	246.295	265.363	10.9871	22	1242
26	245.682	265.294	10.902	22	1298
27	246.009	265.309	11.173	22	1352
28	246.51	264.617	11.4755	22	1408
29	245.188	264.446	11.7885	22	1460
30	246.662	263.982	12.7556	22	1517
31	249.278	263.035	14.6405	22	1593
32	244.568	266.278	10.7876	22	1617
33	245.258	267.68	11.4888	22	1673
34	244.488	267.804	11.9661	22	1724
35	245.753	267.269	12.9719	22	1776
36	248.849	264.259	15.7068	22	1856
37	249.196	264.275	16.0569	22	1903
38	250.546	264.641	15.9644	22	1955
39	250.182	263.727	17.3419	22	2006
40	246.781	266.539	13.7408	22	2030
41	246.679	265.989	14.488	22	2085
42	246.583	266.075	14.2997	22	2133
43	246.653	265.298	14.7677	22	2183
44	246.232	263.939	16.0386	22	2233
45	247.859	261.959	17.6608	22	2308
46	247.108	265.142	15.7049	22	2357
47	247.82	265.226	15.2212	22	2405
48	247.242	265.199	15.6425	22	2456
49	247.654	265.2	15.7882	22	2506
50	247.111	264.414	15.8706	22	2554
51	248.036	262.376	17.8018	22	2604
52	247.118	261.418	18.426	22	2654
53	246.461	261.428	18.0567	22	2704
54	246.56	261.239	17.6783	22	2751
55	246.993	261.227	17.8799	22	2801
56	246.766	261.252	18.0795	22	2851
57	247.501	259.622	20.436	22	2901
58	246.475	261.227	18.106	22	2951
59	246.923	259.933	19.3977	22	3000
60	247.124	259.657	20.2314	22	3050
61	247.253	259.574	20.2573	22	3099
62	247.747	259.799	20.0707	22	3148
63	247.887	259.156	20.6055	22	3196
64	247.697	259.311	21.0717	22	3246
65	246.413	258.268	21.0718	22	3293
66	246.548	257.127	23.0489	22	3339
67	246.385	258.588	21.4634	22	3385
68	246.675	257.014	22.4516	22	3434
69	246.6	256.897	23.8278	22	3486
70	246.654	256.822	25.5	22	3548
71	246.945	257.028	25.5	22	3595
72	247.24	256.888	25.5	22	3648
73	246.653	257.543	25.5	22	3698
74	247.087	257.988	25.5	22	3748
75	247.207	258.293	25.5	22	3799
76	246.358	257.641	25.5	22	3847
77	246.842	257.747	25.5	22	3894
78	246.635	257.593	25.5	22	3943
79	248.823	259.417	25.5	22	3991
80	248.863	260.169	25.5	22	4041
81	247.625	258.809	25.5	22	4090
82	247.029	258.845	25.5	22	4140
83	246.23	257.654	25.5	22	4188
84	247.127	258.28	25.5	22	4236
85	247.046	258.504	25.5	22	4284
86	246.758	258.054	25.5	22	4331
87	246.358	257.6	25.5	22	4378
88	246.638	257.341	25.5	22	4426
89	246.655	257.564	25.5	22	4474
90	246.4	257.571	25.5	22	4521
91	247.011	257.417	25.5	22	4567
92	246.899	257.241	25.5	22	4613
93	247.748	257.687	25.5	22	4660
94	245.796	257.509	25.5	22	4707
95	248.012	259.249	25.5	22	4753
96	248.39	257.762	25.5	22	4798
97	248.9	257.482	25.5	22	4842
98	248.84	257.874	25.5	22	4884
99	247.398	257.789	25.5	22	4930
100	247.336	257.929	25.5	22	4974
101	246.915	257.647	25.5	22	5018
102	246.194	257.612	25.5	22	5062
103	245.57	258.589	25.5	22	5106
104	248.143	260.23	25.5	22	5150
105	247.378	257.89	25.5	22	5192
1	152.343	438.063	9.57447	23	22
2	151.644	438.23	9.76769	23	71
3	151.37	438.452	9.83673	23	117
4	151.742	438.169	9.79608	23	167
5	151.444	438.277	9.95226	23	215
6	151.744	438.111	9.68765	23	262
7	152.952	437.544	9.53123	23	311
8	152.423	437.716	9.53187	23	359
9	151.553	438.244	9.97801	23	407
10	153.188	438.475	10.369	23	456
11	153.696	437.698	10.0921	23	504
12	151.987	438.622	10.5253	23	555
13	152.69	437.41	10.2029	23	606
14	149.485	437.079	10.6155	23	658
15	147.973	436.545	10.3009	23	710
16	148.757	436.739	10.4725	23	763
17	149.338	436.886	10.6461	23	819
18	150.138	436.719	10.4617	23	870
19	152.532	436.764	10.4175	23	924
20	153.538	436.43	10.336	23	975
21	152.688	436.317	10.429	23	1029
22	152.29	436.32	10.5961	23	1083
23	152.818	436.514	10.8066	23	1137
24	152.53	436.54	10.9208	23	1191
25	151.083	436.553	11.0141	23	1244
26	153.833	435.939	10.6317	23	1299
27	153.949	436.329	10.7803	23	1354
28	152.609	436.505	11.0382	23	1410
29	150.276	436.717	11.5173	23	1463
30	155.384	436.194	11.186	23	1514
31	155.285	436.607	11.0594	23	1570
32	152.484	437.215	11.35	23	1622
33	149.735	437.204	11.6856	23	1677
34	152.425	438.528	11.9381	23	1731
35	149.248	437.94	12.261	23	1783
36	149.114	438.276	12.2323	23	1835
37	149.709	438.637	12.5656	23	1886
38	148.304	438.431	12.2392	23	1934
39	147.957	438.718	12.2411	23	1984
40	148.991	438.788	12.5109	23	2037
41	147.175	439.248	12.6897	23	2088
42	147.171	439.237	12.858	23	2136
43	147.387	438.593	12.3353	23	2186
44	148.141	438.466	12.4273	23	2236
45	147.04	438.448	12.4072	23	2285
46	148.68	438.521	12.7855	23	2335
47	146.535	440.099	12.9085	23	2384
48	146.057	438.38	12.1578	23	2435
49	146.035	438.164	11.9974	23	2484
50	147.156	438.861	12.6459	23	2533
51	146.56	438.198	12.3669	23	2581
52	146.89	438.23	12.5702	23	2631
53	146.553	437.932	12.6417	23	2679
54	146.493	437.534	12.2651	23	2729
55	150.184	438.395	13.1463	23	2777
56	150.457	438.964	13.3546	23	2827
57	149.374	438.237	13.3879	23	2875
58	147.381	438.619	13.1412	23	2925
59	146.147	438.2	13.2722	23	2975
60	147.208	436.869	13.257	23	3025
61	147.545	438.315	13.6355	23	3074
62	147.942	437.652	13.2037	23	3123
63	147.086	438.797	13.9151	23	3172
64	146.791	437.283	13.3298	23	3221
65	145.415	436.164	12.4326	23	3269
1	210.039	489.899	10.3035	24	23
2	209.009	489.591	10.3082	24	72
3	209.724	489.831	10.3753	24	118
4	209.993	489.769	10.3549	24	168
5	209.968	489.565	10.1511	24	216
6	209.744	489.604	10.3135	24	263
7	209.386	489.598	10.4391	24	312
8	209.357	489.704	10.3009	24	360
9	209.553	489.652	10.3034	24	408
10	209.478	489.41	10.606	24	457
11	209.568	489.315	10.8087	24	505
12	210.381	489.722	10.8537	24	556
13	208.833	488.814	10.9895	24	607
14	208.635	488.902	11.0207	24	659
15	207.756	488.426	11.1099	24	711
16	208.601	488.764	11.1279	24	764
17	208.845	488.656	11.1981	24	820
18	209.644	488.944	11.0742	24	871
19	209.002	488.61	11.2656	24	925
20	208.435	488.549	11.4186	24	978
21	208.11	488.192	11.4081	24	1032
22	207.901	488.116	11.5687	24	1086
23	209.391	488.951	11.5075	24	1140
24	209.863	488.835	11.5881	24	1194
25	212.413	490.309	11.0876	24	1247
26	211.258	489.765	11.5112	24	1302
27	210.953	489.666	11.4938	24	1357
28	209.761	489.057	11.7674	24	1414
29	209.063	488.772	12.2358	24	1467
30	209.038	488.743	12.3344	24	1519
31	209.426	489.104	12.2563	24	1574
32	211.2	490.118	12.062	24	1626
33	211.446	490.602	12.1714	24	1681
34	210.431	490.245	12.6447	24	1732
35	210.456	490.537	12.97	24	1785
36	208.28	489.532	13.1374	24	1837
37	209.018	489.763	13.2563	24	1888
38	209.626	489.953	13.225	24	1936
39	209.212	489.685	13.3318	24	1986
40	210.348	490.324	13.626	24	2039
41	210.157	490.435	13.594	24	2090
42	209.901	490.3	13.7416	24	2138
43	209.789	490.434	13.7117	24	2188
44	209.78	490.402	13.5213	24	2238
45	210.146	490.264	13.5151	24	2287
46	210.367	490.386	13.5862	24	2337
47	210.799	490.656	13.5613	24	2386
48	210.393	490.658	13.6785	24	2437
49	210.006	490.548	13.5665	24	2486
50	209.913	490.244	13.5285	24	2535
51	209.762	490.116	13.5528	24	2583
52	209.984	489.976	13.5684	24	2634
53	210.101	489.921	13.7942	24	2683
54	209.983	489.922	13.8477	24	2732
55	210.104	489.778	13.9143	24	2780
56	209.58	489.611	14.0776	24	2831
57	209.647	489.585	14.0626	24	2879
58	210.406	489.733	14.1936	24	2929
59	210.553	489.744	14.1117	24	2978
60	210.707	489.773	14.3572	24	3048
61	210.624	489.672	14.3321	24	3097
62	209.357	489.413	14.2654	24	3147
63	209.622	489.471	14.3594	24	3195
64	210.492	489.795	14.2576	24	3245
65	210.816	489.674	14.1882	24	3272
66	210.581	489.553	14.2852	24	3338
67	209.936	489.173	14.9313	24	3384
68	210.178	489.318	14.8788	24	3432
69	209.991	489.476	14.9501	24	3482
70	209.896	489.623	14.9552	24	3533
71	210.277	489.932	15.107	24	3583
72	210.212	489.898	15.3256	24	3631
73	210.871	490.166	15.436	24	3682
74	210.946	490.379	15.6958	24	3732
75	210.612	490.478	15.6492	24	3782
76	210.825	490.844	15.7835	24	3832
77	210.383	491.025	15.8177	24	3879
78	210.712	491.092	15.8285	24	3929
79	211.184	491.26	15.9786	24	3977
80	211.851	491.547	15.918	24	4027
81	211.215	491.128	16.0127	24	4077
82	211.164	491.388	16.0993	24	4127
83	211.618	491.536	16.1795	24	4174
84	210.638	491.242	16.3278	24	4221
85	211.05	491.242	16.2081	24	4269
86	207.52	492.734	22.0373	24	4319
87	211.892	491.372	16.067	24	4365
88	211.119	490.791	15.941	24	4413
89	210.875	490.862	16.029	24	4461
90	210.933	490.892	15.9764	24	4507
91	212.055	491.562	15.7087	24	4554
92	212.884	491.935	15.5726	24	4600
93	214.607	492.655	15.3113	24	4647
94	214.556	492.462	15.4254	24	4694
95	214.339	492.368	15.5063	24	4740
96	212.058	491.157	15.9978	24	4786
97	211.747	490.923	15.9448	24	4829
98	211.555	490.794	15.9808	24	4872
99	211.183	490.403	16.2705	24	4914
100	211.244	490.278	16.3277	24	4960
101	211.046	489.957	16.3685	24	5005
102	210.636	490.159	16.3918	24	5049
103	211.173	490.285	16.5563	24	5092
104	211.029	490.36	16.8155	24	5136
105	210.916	490.352	16.7489	24	5176
106	210.895	490.216	16.4849	24	5225
1	93.2233	262.22	12.0018	25	24
2	93.4995	263.71	12.2152	25	73
3	95.3359	266.199	11.803	25	119
4	95.4011	265.114	11.5701	25	166
5	95.8919	266.164	11.3604	25	214
6	95.0673	265.826	11.3498	25	261
7	93.8281	263.461	11.5708	25	310
8	94.5623	264.222	11.7275	25	358
9	92.5591	261.539	12.4135	25	409
10	92.1098	260.25	12.356	25	458
11	91.677	259.214	12.5473	25	506
12	91.4553	259.788	12.4596	25	557
13	93.6197	262.134	12.144	25	608
14	94.2856	263.092	12.0374	25	657
15	92.0657	260.297	12.5995	25	712
16	91.5753	259.809	13.0797	25	765
17	92.3299	260.051	12.8131	25	821
18	91.5123	258.607	12.7669	25	872
19	92.146	260.914	12.6545	25	926
20	92.5657	261.366	12.6403	25	979
21	92.6592	261.996	12.9515	25	1033
22	91.5022	260.649	13.0891	25	1087
23	91.6718	260.311	13.3739	25	1141
24	91.7898	259.309	13.6379	25	1195
25	92.3491	260.684	13.5485	25	1248
[truncated: 3,235 more rows]
