# Supplementary material for: Functional visualization of NK cell-mediated killing of metastatic single tumor cells
Source: eLife journal article supplement (doi:10.7554/elife.76269), 2022-02-03
Supplement: supp [file tumor_3.xlsx]

## Sheet: Sheet1
1	247.172	87.1316	12.1388	1	0
2	247.378	87.2373	12.0723	1	40
3	250.491	89.3159	9.35911	1	78
4	247.82	87.5783	11.951	1	118
5	253.161	90.7449	9.12839	1	157
6	252.595	90.8033	9.38322	1	197
7	253.251	91.3295	9.48872	1	236
8	252.713	91.3486	9.56277	1	277
9	253.009	91.5327	9.4377	1	318
10	253.901	91.8372	9.56617	1	359
11	253.932	91.896	9.41332	1	401
12	254.138	91.8797	9.63766	1	450
13	252.976	91.8104	9.51445	1	485
14	252.993	91.2178	9.87934	1	527
15	251.569	96.201	9.03067	1	569
16	251.404	96.6663	9.44467	1	611
17	251.373	96.922	9.63005	1	653
18	251.621	96.3303	9.151	1	696
19	251.941	95.4914	8.67106	1	738
20	252.625	94.093	8.33963	1	781
21	253.212	93.1675	8.41072	1	825
22	253.049	93.0421	8.70403	1	869
23	252.991	92.8059	8.60941	1	911
24	253.412	92.6563	8.40076	1	955
25	252.899	92.8643	8.44699	1	999
26	252.381	92.5716	8.84656	1	1043
27	252.673	92.1498	9.08908	1	1087
28	252.918	91.9272	9.52717	1	1130
29	252.656	91.5603	9.6364	1	1173
30	251.431	90.4241	9.98234	1	1216
31	251.688	91.0013	9.96177	1	1259
32	251.357	90.7222	10.1462	1	1302
33	250.861	90.1211	10.4813	1	1345
34	252.024	91.1594	9.75138	1	1389
35	252.536	91.1877	9.37901	1	1433
36	252.637	90.5922	9.76287	1	1477
37	250.337	94.9754	10.0356	1	1520
38	250.175	95.2794	9.82504	1	1565
39	250.367	94.6628	9.50663	1	1610
40	250.52	94.5163	9.56497	1	1655
41	250.052	95.2401	9.69876	1	1699
42	250.155	94.1171	9.96036	1	1745
43	250.69	93.6681	9.65562	1	1790
44	250.539	94.0293	9.5426	1	1836
45	250.928	93.2885	9.22285	1	1882
46	250.885	93.7281	9.16502	1	1928
47	250.602	94.038	9.39768	1	1974
48	251.062	94.0055	9.37273	1	2020
49	251.593	93.8279	9.12477	1	2066
50	251.224	94.757	9.81991	1	2112
51	250.961	94.8569	10.0279	1	2158
52	251.273	95.2219	10.2327	1	2205
53	251.458	95.2695	10.4303	1	2251
54	251.456	95.911	10.3246	1	2295
55	251.423	96.435	10.3668	1	2339
56	251.544	96.3541	10.4654	1	2383
57	251.818	96.4079	10.6676	1	2428
58	251.859	96.7542	10.7969	1	2473
59	252.033	97.0414	10.6783	1	2518
60	251.915	96.9426	10.7282	1	2563
61	251.934	97.0541	10.8537	1	2607
62	252.082	97.0124	10.7543	1	2653
63	251.998	97.093	10.7543	1	2699
64	252.109	96.8883	10.6124	1	2745
65	252.083	97.1797	10.5553	1	2791
66	251.806	97.4838	10.8944	1	2837
67	251.997	95.988	10.4124	1	2883
68	252.197	94.6485	10.077	1	2927
69	251.783	96.2255	10.6432	1	2972
70	251.733	96.5443	10.6837	1	3016
71	251.643	96.8466	10.8072	1	3060
72	251.579	96.6147	10.6189	1	3104
73	251.494	96.6565	10.7009	1	3148
74	251.433	96.4911	10.6288	1	3192
75	251.621	96.203	10.2793	1	3235
76	251.304	96.0716	10.3122	1	3279
77	251.363	96.1315	10.4675	1	3323
78	251.485	95.7673	10.5433	1	3368
79	251.542	95.8725	10.4676	1	3413
80	251.389	95.6912	10.5881	1	3457
81	251.341	95.5396	10.5429	1	3501
82	251.387	95.4843	10.5751	1	3545
83	251.334	95.4883	10.5519	1	3589
84	251.571	95.4283	10.5222	1	3634
85	251.444	95.5214	10.7076	1	3679
86	251.508	95.0406	10.5845	1	3724
87	251.436	95.1825	10.6331	1	3768
88	251.379	94.951	10.5964	1	3812
89	251.615	94.9479	10.6719	1	3856
90	251.332	95.1416	10.7492	1	3902
91	251.581	95.1653	10.8755	1	3950
92	251.598	95.2793	10.6112	1	3998
93	251.807	95.351	10.9265	1	4047
94	251.774	95.7571	11.1348	1	4094
95	251.969	95.3313	11.14	1	4143
96	252.119	95.6848	11.2747	1	4191
97	252.395	96.1078	11.3498	1	4240
98	252.286	96.418	11.6322	1	4288
99	252.504	96.8189	11.6495	1	4335
100	252.716	96.7216	11.7294	1	4382
101	252.717	96.5639	11.8113	1	4430
102	252.701	96.6682	11.7765	1	4478
103	252.721	96.8782	11.7251	1	4525
104	252.589	97.038	11.8627	1	4572
105	252.821	97.1766	11.7283	1	4620
106	252.508	97.7036	11.7142	1	4668
107	252.628	97.3444	11.724	1	4716
108	254.733	94.4965	11.4357	1	4770
109	254.376	95.583	11.1433	1	4818
110	252.981	96.5696	11.2587	1	4859
111	252.336	97.0726	11.4108	1	4907
112	252.283	96.9813	11.3853	1	4955
113	252.184	97.2645	11.5892	1	5001
114	252.024	97.1599	11.7552	1	5050
115	251.88	96.852	11.9044	1	5097
116	251.888	96.3201	11.7566	1	5145
117	251.951	96.5207	11.5906	1	5195
118	251.864	96.3573	11.769	1	5246
119	251.894	96.4637	11.6728	1	5296
120	253.405	94.248	11.3446	1	5347
121	252.725	95.025	11.495	1	5397
122	254.184	94.5585	11.1823	1	5451
123	253.579	94.9474	11.1667	1	5495
124	253.498	93.6542	11.3792	1	5543
125	252.018	95.9394	11.6815	1	5594
126	251.932	95.6261	11.7712	1	5646
127	252.138	95.4523	11.7495	1	5696
128	252.203	95.5908	11.6436	1	5747
129	251.991	95.8297	11.6423	1	5798
130	252.117	95.9272	11.8072	1	5850
131	251.785	96.3301	12.0505	1	5901
132	251.748	96.3918	12.0328	1	5952
133	252.113	96.3429	11.9492	1	6002
134	252.119	96.5287	12.2354	1	6051
135	252.175	96.4288	12.1316	1	6101
136	252.289	96.5995	12.324	1	6150
137	252.644	96.4641	12.0761	1	6201
138	253.204	96.1118	12.0391	1	6253
139	253.548	96.7499	12.2385	1	6303
140	253.113	97.0545	12.4453	1	6354
141	253.608	97.0561	12.4245	1	6406
142	253.918	97.1142	12.3517	1	6456
143	253.796	97.5563	12.4611	1	6506
144	253.962	97.6073	12.5661	1	6556
145	253.858	97.7985	12.4663	1	6605
146	253.669	97.8751	12.6452	1	6655
147	253.777	98.0258	12.5876	1	6703
148	253.654	98.0155	12.7026	1	6752
149	253.287	97.8394	12.699	1	6801
150	253.289	97.6769	12.6027	1	6850
151	253.388	97.6204	12.4516	1	6899
152	252.948	97.6164	12.3822	1	6948
153	253.04	97.4718	12.3039	1	6997
154	253.012	97.7563	12.4659	1	7046
155	253.05	97.4134	12.5749	1	7095
156	252.893	97.2435	12.2862	1	7144
157	252.791	97.0886	12.3467	1	7193
158	252.742	97.1325	12.3606	1	7242
159	252.545	96.844	12.3009	1	7291
160	252.579	96.5669	12.3162	1	7340
161	252.646	96.5186	12.21	1	7387
162	252.519	96.367	12.3649	1	7436
163	252.318	96.3278	12.4626	1	7485
164	252.329	96.2582	12.5323	1	7532
165	252.532	96.2535	12.6428	1	7580
166	252.39	96.1338	12.4867	1	7629
167	252.422	96.1005	12.5827	1	7678
168	252.42	95.8854	12.5419	1	7727
169	252.428	95.988	12.6097	1	7778
170	252.342	96.2484	12.6223	1	7828
171	252.237	96.0213	12.5966	1	7878
172	252.261	96.1835	12.6789	1	7926
173	252.221	96.0876	12.7197	1	7975
174	252.261	96.1888	12.6967	1	8023
175	252.111	96.0905	12.6343	1	8072
176	252.006	96.1446	12.7343	1	8120
177	252.197	96.0401	12.7175	1	8169
178	252.55	96.0684	12.6852	1	8217
179	253.062	95.9332	12.5606	1	8267
180	253.086	96.5665	12.796	1	8317
181	253.427	96.4446	12.8321	1	8366
182	253.628	96.6536	12.8895	1	8416
183	253.492	96.9566	13.0913	1	8464
184	254.871	95.1953	12.8673	1	8519
185	253.924	97.0775	13.3564	1	8560
186	253.609	97.7802	13.5342	1	8609
187	253.634	98.4833	13.4618	1	8658
188	253.905	98.135	13.4364	1	8705
189	253.931	98.3931	13.417	1	8753
190	254.175	98.3556	13.2936	1	8807
191	254.248	98.3067	13.3437	1	8855
192	254.196	98.2856	13.5059	1	8905
193	254.045	98.326	13.4776	1	8954
194	254.109	98.1734	13.3826	1	9003
195	254.088	98.2372	13.1941	1	9052
196	253.986	97.9993	13.1854	1	9101
197	253.791	97.999	13.2346	1	9144
198	253.717	98.0148	13.1771	1	9193
199	254.997	95.1285	12.7471	1	9247
200	253.685	97.7972	13.1944	1	9289
201	253.64	97.8635	13.2424	1	9337
202	253.727	97.7537	13.2181	1	9384
203	253.444	97.5585	13.1306	1	9431
204	254.032	96.8613	13.0828	1	9484
205	253.557	97.0176	13.0307	1	9525
206	254.259	96.7813	13.042	1	9577
207	255.881	95.2594	12.5907	1	9624
208	256.566	95.0155	12.9202	1	9671
209	255.941	94.4908	12.933	1	9717
210	256.297	95.5115	13.0456	1	9763
211	255.046	92.543	13.4415	1	9810
212	256.034	92.2093	13.8056	1	9857
213	256.647	92.9068	13.6823	1	9903
214	256.022	92.6322	13.4979	1	9949
215	256.336	92.4364	13.5616	1	9996
216	256.452	92.3207	13.7806	1	10044
217	256.289	91.5574	14.0731	1	10090
218	256.669	91.3249	14.2441	1	10137
219	256.587	91.2356	14.2421	1	10184
220	256.327	91.0854	14.1985	1	10231
221	256.121	91.1467	14.0735	1	10277
222	256.055	91.2332	14.2005	1	10323
223	256.043	91.4294	14.06	1	10369
224	256.276	91.55	14.0884	1	10415
225	256.589	91.5937	14.4786	1	10487
226	257.111	91.9808	14.7617	1	10532
227	256.804	92.2462	14.6424	1	10578
228	256.96	92.7821	14.3947	1	10623
229	256.925	93.0246	14.4472	1	10668
230	256.712	93.3004	14.4286	1	10713
231	256.791	93.4188	14.4285	1	10757
232	257.034	93.4501	14.2669	1	10800
233	257.216	93.6209	14.4581	1	10843
234	257.253	93.8634	14.5045	1	10886
1	312.63	94.1911	5.5	2	1
2	312.722	95.9269	5.5	2	41
3	312.8	93.8764	5.5	2	79
4	312.845	94.9995	5.5	2	119
5	312.779	94.6811	5.5	2	158
6	313.109	94.2502	5.5	2	198
7	313.221	94.4927	5.5	2	237
8	313.368	94.4573	5.5	2	278
9	313.812	95.0954	5.5	2	319
10	313.875	94.88	5.5	2	360
11	313.907	95.623	5.5	2	402
12	314.186	95.7737	5.5	2	443
13	314.342	95.3424	5.5	2	486
14	314.107	95.5755	5.5	2	528
15	313.914	95.515	5.5	2	570
16	314.048	95.3222	5.5	2	612
17	314.339	95.1908	5.5	2	654
18	314.374	95.0253	5.5	2	697
19	314.181	94.9825	5.5	2	739
20	313.881	94.8671	5.5	2	782
21	313.71	95.0022	5.5	2	826
22	313.656	94.4057	5.5	2	870
23	313.657	94.5244	5.5	2	912
24	313.809	94.5804	5.5	2	956
25	313.439	95.5369	5.5	2	1000
26	313.696	94.6	5.5	2	1044
27	313.65	94.1832	5.5	2	1088
28	313.424	94.2208	5.5	2	1131
29	313.701	94.2332	5.5	2	1174
30	313.692	94.0663	5.5	2	1217
31	313.576	94.3896	5.5	2	1260
32	313.344	94.2349	5.5	2	1303
33	313.403	93.8863	5.5	2	1346
34	312.484	93.8645	5.5	2	1390
35	310.301	92.7213	5.5	2	1434
36	310.177	92.1814	5.5	2	1478
37	310.306	91.891	5.5	2	1521
38	310.242	91.7482	5.5	2	1566
39	309.93	91.4258	5.5	2	1611
40	310.059	91.4415	5.5	2	1656
41	309.807	91.5081	5.5	2	1700
42	309.814	91.0672	5.5	2	1746
43	310.17	91.153	5.5	2	1791
44	310.319	91.4253	5.5	2	1837
45	309.737	90.7696	5.5	2	1883
46	309.711	90.8119	5.5	2	1929
47	309.8	91.1219	5.5	2	1975
48	310.023	90.9208	5.5	2	2021
49	310.501	91.0912	5.5	2	2067
50	310.528	91.3097	5.5	2	2113
51	310.569	91.2744	5.5	2	2159
52	311.128	91.5834	5.5	2	2207
53	311.119	91.6471	5.5	2	2253
54	311.362	91.6565	5.5	2	2297
55	311.465	92.0275	5.5	2	2341
56	311.394	92.2663	5.5	2	2385
57	311.5	92.3325	5.5	2	2430
58	311.873	92.1082	5.5	2	2475
59	312.024	92.3308	5.5	2	2520
60	311.773	92.3245	5.5	2	2565
61	311.954	92.3764	5.5	2	2609
62	311.942	92.4573	5.5	2	2655
63	311.936	92.7258	5.5	2	2701
64	312.128	92.6774	5.5	2	2747
65	312.11	92.299	5.5	2	2793
66	311.875	92.3169	5.5	2	2839
67	306.021	94.7124	7.88879	2	2885
68	311.555	92.4746	5.5	2	2929
69	311.902	92.7042	5.5	2	2974
70	311.221	91.99	5.5	2	3018
71	311.426	91.7003	5.5	2	3062
72	311.386	91.6574	5.5	2	3106
73	311.256	91.553	5.5	2	3150
74	311.186	91.2689	5.5	2	3194
75	311.257	91.6038	5.5	2	3237
76	311.29	91.3888	5.5	2	3281
77	311.259	91.224	5.5	2	3325
78	311.257	91.154	5.5	2	3370
79	311.095	90.7918	5.5	2	3415
80	310.909	90.5057	5.5	2	3459
81	310.88	90.5381	5.5	2	3503
82	310.667	90.5609	5.5	2	3547
83	310.505	90.3357	5.5	2	3591
84	310.641	90.6796	5.5	2	3636
85	310.934	90.6765	5.5	2	3681
86	310.846	90.5198	5.5	2	3726
87	310.689	90.5928	5.5	2	3770
88	310.572	90.3762	5.5	2	3814
89	310.778	90.5595	5.5	2	3858
90	310.89	90.2346	5.5	2	3904
91	311.033	90.3679	5.5	2	3952
92	310.962	90.1736	5.5	2	4000
93	310.927	90.5455	5.5	2	4049
94	311.054	90.6328	5.5	2	4096
95	311.458	90.9297	5.5	2	4145
96	311.452	91.4804	5.5	2	4193
97	311.826	91.3948	5.5	2	4242
98	312.024	91.8141	5.5	2	4289
99	312.304	91.9188	5.5	2	4336
100	312.074	91.6059	5.5	2	4383
101	312.328	91.7165	5.5	2	4431
102	312.418	92.2728	5.5	2	4479
103	312.489	92.104	5.5	2	4526
104	312.653	92.2313	5.5	2	4573
105	312.572	92.3427	5.5	2	4621
106	312.361	92.2209	5.5	2	4669
107	312.182	92.2548	5.5	2	4717
108	312.005	92.0088	5.5	2	4764
109	311.972	92.0442	5.5	2	4812
110	311.97	92.3014	5.5	2	4861
111	311.818	91.9093	5.5	2	4909
112	311.821	92.0546	5.5	2	4957
113	311.701	91.759	5.5	2	5003
114	311.55	91.5675	5.5	2	5051
115	311.589	91.5226	5.5	2	5098
116	311.598	91.7198	5.5	2	5146
117	311.401	91.6905	5.5	2	5197
118	311.647	91.2527	5.5	2	5247
119	311.677	91.1025	5.5	2	5298
120	311.448	91.1562	5.5	2	5349
121	311.475	91.135	5.5	2	5398
122	311.346	91.2513	5.5	2	5446
123	311.273	91.0879	5.5	2	5496
124	311.295	90.9265	5.5	2	5544
125	311.599	90.8937	5.5	2	5595
126	311.471	90.9412	5.5	2	5647
127	311.547	90.7951	5.5	2	5697
128	311.312	91.5245	6.83627	2	5751
129	311.438	90.8111	5.5	2	5799
130	311.511	90.8355	5.5	2	5851
131	311.686	90.6575	5.5	2	5902
132	311.27	91.3081	7.03185	2	5956
133	306.057	95.5035	9.30175	2	6006
134	310.772	95.3461	8.59613	2	6055
135	311.63	91.6175	7.76466	2	6105
136	310.852	96.1618	8.79288	2	6154
137	310.728	96.3263	9.10126	2	6205
138	311.339	97.149	8.63423	2	6257
139	306.481	96.2938	10.1435	2	6307
140	311.589	96.6157	9.50151	2	6358
141	306.683	96.3832	10.0997	2	6409
142	297.812	98.069	12.1306	2	6466
143	297.004	98.0841	12.2662	2	6516
1	293.888	99.4453	7.59379	3	2
2	294.692	99.3633	7.65275	3	42
3	294.509	99.3547	7.71818	3	80
4	294.538	99.7914	7.84087	3	120
5	294.784	99.865	7.75312	3	159
6	294.437	100.286	7.91963	3	199
7	295.111	99.9254	7.86066	3	238
8	294.746	100.714	8.16962	3	279
9	289.145	98.1423	11.1104	3	326
10	289.077	98.1108	11.1456	3	367
11	288.98	97.387	11.3912	3	409
12	288.938	97.8075	11.5192	3	451
13	289.71	98.0987	11.2576	3	493
14	290.016	98.4681	10.9948	3	535
15	290.548	98.3689	10.9615	3	577
16	289.952	98.9239	11.0053	3	619
17	288.487	100.065	11.436	3	661
18	288.841	99.3987	11.2655	3	704
19	289.337	98.8854	11.2766	3	746
20	290.51	98.6425	11.3143	3	789
21	290.724	98.2	11.2585	3	833
22	290.912	97.9575	10.9925	3	877
23	295.59	101.134	8.01065	3	913
24	295.575	101.18	8.13322	3	957
25	296.124	101.031	8.12926	3	1001
26	295.661	100.786	7.9532	3	1045
27	296.089	100.937	8.18922	3	1089
28	296.382	100.666	8.0372	3	1132
29	295.688	100.466	8.2432	3	1175
30	295.529	100.989	8.3023	3	1218
31	295.538	100.432	8.39546	3	1261
32	295.92	100.666	8.36806	3	1304
33	296.081	100.755	8.19739	3	1347
34	295.806	100.319	7.99391	3	1391
35	295.703	100.267	8.18165	3	1435
36	295.905	100.11	8.16469	3	1479
37	295.939	99.9781	8.33961	3	1522
38	294.775	100.457	8.40004	3	1567
39	291.718	96.9219	10.9416	3	1619
40	291.626	96.8728	10.9421	3	1664
41	296.389	99.668	8.17859	3	1701
42	295.511	99.7701	8.31627	3	1747
43	295.095	100.054	8.24675	3	1792
44	295.358	99.8879	8.28758	3	1838
45	291.253	96.6634	10.7871	3	1891
46	295.469	99.605	8.04401	3	1930
47	295.594	99.7878	8.10932	3	1976
48	295.251	100.224	8.33648	3	2022
49	295.694	100.434	8.25798	3	2068
50	296.529	100.441	8.39726	3	2114
51	292.064	97.2702	11.4725	3	2168
52	290.932	97.512	11.9565	3	2217
53	293.057	97.7508	11.4622	3	2260
54	291.277	97.9752	11.9002	3	2307
55	293.095	98.1239	11.5358	3	2349
56	294.01	98.083	11.4021	3	2392
57	292.253	98.1255	11.9842	3	2440
58	293.032	98.2192	11.9216	3	2485
59	295.011	98.7445	11.4305	3	2527
60	297.285	98.1332	11.0523	3	2572
61	298.282	98.1286	11.0832	3	2616
62	298.686	98.2955	11.0218	3	2662
63	298.38	97.8142	11.1803	3	2708
64	298.14	97.5511	11.0127	3	2754
65	298.237	97.6904	10.8101	3	2800
66	298.635	96.9171	11.1664	3	2846
68	299.337	97.399	10.1589	3	2936
1	362.134	120.418	5.5	4	3
2	363.849	120.17	5.5	4	43
3	363.366	120.439	5.5	4	81
4	362.861	120.824	5.5	4	121
5	362.206	121.157	5.5	4	160
6	361.88	121.54	5.5	4	200
7	361.539	121.911	5.5	4	239
8	361.813	122.563	5.5	4	280
9	361.358	122.851	5.5	4	320
10	361.55	123.055	5.5	4	361
11	362.447	122.954	5.5	4	403
12	362.897	123.33	5.5	4	444
13	362.996	123.368	5.5	4	487
14	362.83	123.698	5.5	4	529
15	363.043	123.864	5.5	4	571
16	363.182	123.89	5.5	4	613
17	363.582	124.059	5.5	4	655
18	363.331	123.904	5.5	4	698
19	363.628	123.922	5.5	4	740
20	363.593	123.903	5.5	4	783
21	363.764	123.926	5.5	4	827
22	363.833	123.714	5.5	4	871
23	363.643	123.673	5.5	4	914
24	363.048	123.589	5.5	4	958
25	362.528	123.5	5.5	4	1002
26	361.51	123.38	5.5	4	1046
27	361.258	123.408	5.5	4	1090
28	360.976	123.364	5.5	4	1133
29	361.384	123.283	5.5	4	1176
30	361.117	123.293	5.5	4	1219
31	360.962	123.207	5.5	4	1262
32	360.309	123.121	5.5	4	1305
33	360.077	122.978	5.5	4	1348
34	359.864	122.731	5.5	4	1392
35	359.908	122.53	5.5	4	1436
36	359.68	122.493	5.5	4	1480
37	358.991	122.494	5.5	4	1523
38	358.541	122.62	5.5	4	1568
39	358.79	122.304	5.5	4	1612
40	358.752	122.241	5.5	4	1657
41	359.335	122.377	5.5	4	1702
42	359.268	122.442	5.5	4	1748
43	359.141	122.29	5.5	4	1793
44	358.697	122.249	5.5	4	1839
45	359.165	122.238	5.5	4	1884
46	359.306	122.119	5.5	4	1931
47	359.801	122.047	5.5	4	1977
48	359.769	122.256	5.5	4	2023
49	359.956	122.336	5.5	4	2069
50	360.006	122.368	5.5	4	2115
51	359.763	122.622	5.5	4	2161
52	360	122.927	5.5	4	2209
53	359.97	123.198	5.5	4	2255
54	360.047	123.225	5.5	4	2299
55	360.033	123.255	5.5	4	2343
56	360.21	123.118	5.5	4	2387
57	359.281	123.311	5.5	4	2432
58	359.171	123.386	5.5	4	2477
59	361.244	123.262	5.5	4	2522
60	360.718	123.288	5.5	4	2567
61	360.003	123.481	5.5	4	2611
62	359.881	123.492	5.5	4	2657
63	359.81	123.558	5.5	4	2703
64	359.757	123.609	5.5	4	2749
65	360.299	123.67	5.5	4	2795
66	360.327	123.696	5.5	4	2841
67	360.665	123.579	5.5	4	2887
68	360.908	123.889	5.5	4	2931
69	360.367	123.749	5.5	4	2976
70	359.788	123.788	5.5	4	3020
71	358.885	123.511	5.5	4	3064
72	358.927	123.171	5.5	4	3108
73	359.43	123.072	5.5	4	3152
74	359.26	122.816	5.5	4	3196
75	358.585	122.853	5.5	4	3239
76	358.763	122.619	5.5	4	3283
77	358.868	122.57	5.5	4	3327
78	358.726	122.543	5.5	4	3372
79	358.777	122.474	5.5	4	3417
80	358.203	122.204	5.5	4	3461
81	358.471	122.281	5.5	4	3505
82	357.847	122.107	5.5	4	3549
83	358.413	122.074	5.5	4	3593
84	357.561	121.83	5.5	4	3638
85	357.038	121.448	6.90196	4	3685
86	356.786	121.715	5.5	4	3728
87	359.199	121.907	5.5	4	3772
88	359.35	122.167	5.5	4	3816
89	360.111	122.117	5.5	4	3860
90	359.211	122.219	5.5	4	3906
91	359.376	122.289	5.5	4	3954
92	360.615	122.445	5.5	4	4002
93	360.135	122.719	5.5	4	4051
94	357.546	122.118	7.2182	4	4100
95	357.095	122.068	7.55718	4	4149
96	356.954	122.358	7.65742	4	4197
97	357.879	122.724	7.92693	4	4246
98	357.252	122.539	7.90773	4	4293
99	357.571	122.711	7.93728	4	4340
100	358.046	122.915	7.628	4	4387
101	356.768	122.743	8.13852	4	4435
102	358.258	123.017	8.09185	4	4483
103	360.271	123.545	7.80517	4	4530
104	361.888	123.793	7.81947	4	4577
105	360.922	123.673	8.13966	4	4625
106	360.306	123.524	8.0834	4	4673
107	359.507	123.642	8.07637	4	4721
108	360.379	123.627	8.05196	4	4768
109	359.615	123.414	7.90035	4	4816
110	360.432	123.497	7.98767	4	4865
111	360.318	123.365	7.80112	4	4913
112	360.801	123.351	7.46721	4	4961
113	360.567	123.232	7.43772	4	5007
114	360.318	123.063	7.37138	4	5055
115	360.408	123.035	7.57542	4	5102
116	360.02	122.957	7.46209	4	5150
117	360.766	122.896	7.44933	4	5201
118	360.772	123.011	7.49315	4	5251
119	360.375	122.92	7.67484	4	5302
120	359.935	122.662	8.15614	4	5353
121	359.604	122.634	8.29144	4	5402
122	359.926	122.47	8.14884	4	5450
123	360.584	122.586	8.03456	4	5500
124	359.93	122.678	8.14456	4	5548
125	357.568	122.281	8.29204	4	5599
126	357.117	121.868	8.41545	4	5651
127	355.517	121.587	8.53845	4	5701
128	356.174	121.79	8.66904	4	5752
129	356.495	121.975	8.71576	4	5803
130	356.575	121.893	9.05371	4	5855
131	356.53	121.838	8.94856	4	5906
132	356.84	121.807	9.34224	4	5958
133	356.391	121.696	9.46881	4	6007
134	356.633	121.718	9.54602	4	6056
135	357.431	121.987	9.64872	4	6106
136	357.482	122.085	9.62739	4	6155
137	357.352	122.443	9.46654	4	6206
138	357.963	122.562	9.28048	4	6258
139	357.213	122.533	9.63749	4	6308
140	357.124	122.619	9.99164	4	6359
141	357.968	122.818	9.83362	4	6411
142	357.816	122.986	9.77257	4	6460
143	357.248	122.981	9.7749	4	6510
144	356.55	122.907	9.76329	4	6560
145	357.016	123.056	9.78794	4	6609
146	357.004	123.369	9.58714	4	6658
147	359.58	124.145	9.03425	4	6706
148	360.506	124.16	9.34087	4	6757
149	360.385	124.18	9.48096	4	6806
150	360.319	123.807	9.72646	4	6855
151	360.598	123.753	9.47021	4	6904
152	360.751	123.7	9.33962	4	6953
153	361.656	123.83	9.0525	4	7001
154	362.04	123.828	8.63038	4	7050
155	362.301	123.691	8.98686	4	7099
156	361.994	123.649	8.9247	4	7148
157	361.909	123.479	8.9515	4	7197
158	362.266	123.394	8.97096	4	7246
159	362.036	123.356	8.8616	4	7295
160	362.246	123.314	8.81252	4	7344
161	361.959	123.196	8.7771	4	7391
162	362.031	123.215	8.84319	4	7440
163	362.229	123.102	9.24451	4	7489
164	361.306	122.934	9.43362	4	7537
165	361.379	122.778	9.35616	4	7586
166	360.841	122.795	9.38505	4	7635
167	360.851	122.814	9.564	4	7683
168	360.462	122.898	9.72039	4	7733
169	360.386	122.879	9.70633	4	7784
170	360.031	122.883	9.94085	4	7834
171	360.052	122.887	9.95128	4	7884
172	360.46	122.808	9.66314	4	7931
173	360.547	122.772	9.74454	4	7981
174	360.518	122.678	10.0122	4	8028
175	360.613	122.806	9.81612	4	8077
176	360.178	122.671	9.92068	4	8125
177	359.966	122.727	10.1412	4	8174
178	360.372	122.92	10.0028	4	8223
179	360.629	123.164	10.2524	4	8273
180	360.965	123.21	10.6039	4	8323
181	361.137	123.307	10.6992	4	8372
182	361.161	123.769	10.6161	4	8422
183	361.441	124.006	10.7119	4	8470
184	361.604	124.265	10.7247	4	8517
185	361.572	124.596	10.9679	4	8564
186	361.454	124.56	10.9117	4	8614
187	361.478	124.702	10.9603	4	8662
188	361.477	124.621	10.8546	4	8710
189	361.681	124.566	10.9773	4	8758
190	361.884	124.548	11.0265	4	8805
191	361.819	124.574	10.9987	4	8853
192	362.006	124.489	10.9769	4	8903
193	361.752	124.626	10.9359	4	8952
194	361.713	124.415	10.8488	4	9001
195	361.672	124.37	10.7314	4	9050
196	361.576	124.121	10.722	4	9099
197	361.551	124.098	10.6093	4	9149
198	361.678	124.148	10.4637	4	9198
199	361.481	123.99	10.4681	4	9245
200	361.457	123.955	10.5605	4	9294
201	361.356	123.814	10.6855	4	9341
202	360.834	123.748	10.7931	4	9389
203	360.705	123.712	10.8092	4	9436
204	360.59	123.635	10.7452	4	9482
205	360.599	123.669	10.7842	4	9530
206	360.52	123.575	10.7504	4	9575
207	360.54	123.511	10.6435	4	9622
208	360.415	123.523	10.6975	4	9669
209	360.148	123.212	10.9127	4	9715
210	360.354	123.11	10.8386	4	9761
211	360.553	123.063	10.8421	4	9808
212	360.654	123.057	10.8356	4	9855
213	360.439	123.13	10.8445	4	9901
214	360.348	122.889	10.946	4	9947
215	360.226	122.647	11.22	4	9994
216	360.19	122.466	11.2438	4	10042
217	360.335	122.492	11.1872	4	10088
218	360.189	122.325	11.2161	4	10135
219	360.567	122.464	11.2571	4	10182
220	360.825	122.454	11.1728	4	10229
221	360.718	122.557	11.1667	4	10276
222	360.645	122.605	11.4293	4	10322
223	360.494	122.678	11.4811	4	10368
224	360.704	122.898	11.5176	4	10414
225	360.849	123.109	11.7238	4	10460
226	360.769	123.301	11.8389	4	10508
227	360.694	123.425	11.9757	4	10554
228	360.721	123.705	11.9963	4	10599
229	360.691	124.003	12.0753	4	10645
230	360.845	124.189	12.0329	4	10690
231	360.679	124.284	12.0915	4	10735
232	360.843	124.625	12.0689	4	10779
233	360.886	124.444	12.1402	4	10822
234	361.082	124.772	11.9768	4	10865
1	397.884	123.728	5.5	5	4
2	397.833	123.415	5.5	5	44
3	398.012	123.869	5.5	5	82
4	397.748	124.157	5.5	5	122
5	397.777	124.446	5.5	5	161
6	398.017	124.417	5.5	5	201
7	398.108	124.612	5.5	5	240
8	398.474	125.207	5.5	5	281
9	398.713	125.233	5.5	5	321
10	399.096	126.096	5.5	5	362
11	398.942	125.344	5.5	5	404
12	399.417	126.082	5.5	5	445
13	399.287	126.274	5.5	5	488
14	399.382	126.244	5.5	5	530
15	399.879	126.814	5.5	5	572
16	399.934	126.507	5.5	5	614
17	400.311	127.362	5.5	5	656
18	399.811	126.202	5.5	5	699
19	399.647	126.307	5.5	5	741
20	399.464	126.557	5.5	5	784
21	399.233	126.445	5.5	5	828
22	399.245	126.298	5.5	5	872
23	399.268	126.617	5.5	5	915
24	399.524	126.748	5.5	5	959
25	398.99	125.868	5.5	5	1003
26	399.055	125.84	5.5	5	1047
27	399.024	125.91	5.5	5	1091
28	398.899	125.781	5.5	5	1134
29	398.819	125.27	5.5	5	1177
30	399.087	125.869	5.5	5	1220
31	399.487	126.312	5.5	5	1263
32	399.318	126.908	5.5	5	1306
33	398.691	125.7	5.5	5	1349
34	398.731	125.865	5.5	5	1393
35	398.68	126.285	5.5	5	1437
36	398.651	125.505	5.5	5	1481
37	398.882	125.233	5.5	5	1524
38	398.776	125.557	5.5	5	1569
39	398.65	125.608	5.5	5	1613
40	398.703	124.988	5.5	5	1658
41	398.596	125.448	5.5	5	1703
42	399.063	125.898	5.5	5	1749
43	398.888	125.44	5.5	5	1794
44	399.383	126.828	5.5	5	1840
45	398.782	125.156	5.5	5	1885
46	398.677	125.555	5.5	5	1932
47	398.951	125.777	5.5	5	1978
48	399.032	125.798	5.5	5	2024
49	399.424	126.287	5.5	5	2070
50	399.665	126.393	5.5	5	2116
51	399.919	126.118	5.5	5	2162
52	400.499	128.011	5.5	5	2210
53	399.702	126.551	7.05264	5	2258
54	400.607	128.425	5.5	5	2300
55	400.609	128.227	5.5	5	2344
56	401.34	129.166	5.5	5	2388
57	400.527	127.459	7.2481	5	2435
58	400.792	127.856	7.09266	5	2480
59	400.368	127.578	7.45603	5	2525
60	400.677	127.751	6.89719	5	2570
61	401.435	130.001	5.5	5	2612
62	400.436	127.722	7.72854	5	2660
63	400.408	127.045	7.83033	5	2706
64	400.563	126.885	7.31867	5	2752
65	400.252	127.139	7.03135	5	2798
66	400.489	127.735	7.30054	5	2844
67	399.93	127.228	6.99321	5	2890
68	400.001	127.037	7.09269	5	2934
69	399.755	126.558	7.488	5	2979
70	399.78	126.687	7.42256	5	3023
71	399.891	126.584	7.57684	5	3067
72	399.918	127.143	7.37813	5	3111
73	399.914	127.192	7.09031	5	3155
74	400.009	126.888	7.19841	5	3199
75	400.267	127.475	5.5	5	3240
76	399.987	126.115	7.51025	5	3286
77	399.884	126.191	7.28057	5	3330
78	400.154	127.196	6.92811	5	3376
79	399.754	126.303	7.29306	5	3420
80	399.66	126.582	7.745	5	3464
81	399.743	125.888	7.32234	5	3508
82	399.783	125.562	7.91872	5	3552
83	399.819	125.315	7.85115	5	3596
84	400.277	125.777	7.70975	5	3642
85	400.031	125.043	7.55007	5	3686
86	399.829	124.971	7.63851	5	3731
87	399.785	125.427	7.87069	5	3775
88	399.731	125.706	7.08192	5	3819
89	399.844	125.764	7.00582	5	3863
90	399.98	125.87	7.32392	5	3909
91	399.856	125.574	7.80326	5	3957
92	399.786	125.588	8.05976	5	4005
93	399.747	126.024	8.35518	5	4054
94	399.825	126.577	8.44987	5	4101
95	399.967	126.043	8.59688	5	4150
96	399.562	124.951	9.59424	5	4198
97	400.043	125.449	9.86962	5	4247
98	400.231	125.822	9.65705	5	4294
99	400.192	126.454	9.70965	5	4341
100	401.393	129.558	9.08703	5	4388
101	401.452	129.38	9.31861	5	4436
102	399.966	126.086	10.064	5	4484
103	399.908	126.271	10.0399	5	4531
104	400.014	125.75	10.0967	5	4579
105	400.244	126.422	9.62857	5	4627
106	400.451	127.285	9.57355	5	4675
107	400.311	127.181	9.57703	5	4723
108	400.893	129.168	9.12385	5	4769
109	401.467	130.133	8.66795	5	4817
110	400.301	127.636	9.50753	5	4867
111	400.988	128.895	8.80275	5	4914
112	400.713	128.35	8.79089	5	4962
113	400.751	128.829	8.60172	5	5008
114	400.814	129.056	8.70976	5	5056
115	400.469	128.16	8.69573	5	5103
116	400.136	127.042	9.15683	5	5151
117	400.433	127.617	8.90492	5	5202
118	400.449	127.712	8.95985	5	5252
119	400.626	127.911	8.79264	5	5303
120	399.921	126.535	9.15436	5	5354
121	399.747	126.033	9.43616	5	5405
122	399.844	125.951	9.46605	5	5454
123	400	125.89	9.62924	5	5503
124	399.636	125.502	9.69856	5	5551
125	400.327	126.913	9.23549	5	5600
126	399.884	125.8	9.43775	5	5654
127	399.653	126.113	9.49973	5	5704
128	400.414	128.139	8.74706	5	5753
129	400.105	126.984	9.11394	5	5804
130	399.507	125.55	9.95441	5	5857
131	399.77	125.437	10.0503	5	5908
132	399.644	125.335	9.80767	5	5959
133	399.851	125.907	9.89178	5	6008
134	399.799	126.317	10.0724	5	6057
135	400.542	128.073	9.86468	5	6107
136	400.294	127.628	10.2405	5	6157
137	400.216	127.314	10.1345	5	6208
138	400.228	127.478	9.78667	5	6260
139	400.411	127.278	10.3622	5	6310
140	400.311	127.395	10.5327	5	6361
141	400.616	127.69	10.6896	5	6413
142	400.772	127.91	10.5721	5	6462
143	400.724	127.703	10.697	5	6512
144	401	127.786	10.8331	5	6562
145	400.991	127.882	10.8632	5	6611
146	401.167	128.324	10.673	5	6660
147	401.384	128.487	10.5491	5	6709
148	401.457	128.682	10.3914	5	6758
149	401.534	128.513	10.3876	5	6807
150	401.397	129.216	10.5161	5	6856
151	401.529	128.972	10.4259	5	6905
152	401.17	128.008	10.0249	5	6954
153	401.16	128.602	10.1938	5	7003
154	401.293	129.652	9.7881	5	7052
155	401.602	131.076	9.85577	5	7101
156	401.151	129.109	10.093	5	7150
157	401.008	127.753	10.0811	5	7199
158	401.335	127.813	10.0992	5	7248
159	401.073	127.77	9.82099	5	7297
160	403.386	135.426	9.03463	5	7345
161	401.87	133.159	9.70296	5	7393
162	401.93	134.365	9.79747	5	7442
163	401.153	129.673	10.1211	5	7491
164	401.654	133.133	10.3588	5	7538
165	401.63	133.335	10.3504	5	7587
166	400.857	128.613	10.1357	5	7636
167	400.768	128.683	10.4586	5	7684
168	401.579	133.692	9.94814	5	7734
169	400.963	130.472	10.3556	5	7785
170	400.99	130.078	10.4891	5	7835
171	400.458	127.56	10.6818	5	7885
172	401.089	130.714	10.5815	5	7932
173	401.001	129.592	10.5305	5	7982
174	400.953	129.804	10.7816	5	8029
175	401.392	132.308	10.4306	5	8078
176	401.216	132.574	10.5361	5	8126
177	401.398	132.331	10.7007	5	8175
178	400.602	126.381	11.0397	5	8224
179	400.83	127.065	11.0421	5	8274
180	401.41	129.147	11.0463	5	8324
181	402.375	132.553	11.0275	5	8373
182	402.64	132.809	10.9826	5	8423
183	402.423	132.309	11.4922	5	8471
184	402.684	132.383	11.4519	5	8518
185	402.268	129.093	11.4387	5	8565
186	402.265	129.235	11.569	5	8615
187	402.621	130.197	11.5482	5	8663
188	402.401	129.523	11.5741	5	8711
189	402.86	130.34	11.4206	5	8759
190	402.728	129.866	11.6322	5	8806
191	402.911	129.939	11.7083	5	8854
192	402.832	128.916	11.5573	5	8904
193	402.73	129.542	11.5089	5	8953
194	403.232	132.558	11.3246	5	9002
195	402.764	130.246	11.3906	5	9051
196	403.34	133.636	11.3232	5	9100
197	402.926	129.847	11.2179	5	9150
198	402.815	130.522	11.1626	5	9199
199	402.851	129.946	11.083	5	9246
200	402.801	130.214	11.1313	5	9295
201	402.93	131.732	11.268	5	9342
202	402.604	131.168	11.0656	5	9390
203	402.553	131.381	11.1009	5	9437
204	402.508	131.276	11.2797	5	9483
205	402.358	130.639	11.2282	5	9531
206	402.236	130.688	11.2523	5	9576
207	402.357	131.57	11.0711	5	9623
208	402.355	131.525	11.1183	5	9670
209	402.186	130.639	11.3029	5	9716
210	402.292	131.303	11.2701	5	9762
211	402.183	130.591	11.3481	5	9809
212	402.365	130.096	11.3337	5	9856
213	402.306	130.236	11.2409	5	9902
214	402.399	131.803	11.5111	5	9948
215	402.423	133.031	11.546	5	9995
216	402.398	133.283	11.683	5	10043
217	402.435	132.944	11.6225	5	10089
218	402.409	132.534	11.694	5	10136
219	402.373	131.266	11.6224	5	10183
220	402.264	130.178	11.463	5	10230
221	402.348	133.531	11.8439	5	10278
222	402.409	132.761	11.9109	5	10325
223	402.48	132.703	11.943	5	10371
224	402.431	131.323	12.1097	5	10418
225	402.833	130.918	12.2135	5	10463
226	402.898	131.581	12.303	5	10509
227	402.944	131.45	12.411	5	10555
228	403.558	134.853	12.3081	5	10601
229	403.573	136.922	12.5047	5	10646
230	403.571	137.28	12.5819	5	10691
231	403.652	137.141	12.5722	5	10736
232	403.103	133.364	12.6132	5	10780
233	402.571	130.848	12.6492	5	10823
234	403.108	133.299	12.5242	5	10866
1	302.983	130.888	5.5	6	5
3	303.703	130.021	5.5	6	83
5	304.003	130.055	5.5	6	162
7	304.179	130.33	5.5	6	241
8	303.062	130.867	5.5	6	282
9	304.171	130.741	5.5	6	322
10	304.213	130.878	5.5	6	363
11	304.785	131.321	5.5	6	405
12	304.701	132.213	5.5	6	446
13	304.905	132.479	5.5	6	489
14	304.438	132.814	5.5	6	531
15	304.802	132.347	5.5	6	573
16	305.138	132.737	5.5	6	615
17	305.169	132.316	5.5	6	657
18	304.81	132.844	5.5	6	700
19	305.866	132.276	5.5	6	742
20	304.76	132.322	5.5	6	785
21	305.173	132.08	5.5	6	829
22	305.804	131.977	5.5	6	873
23	305.165	132.324	5.5	6	916
24	305.312	132.279	5.5	6	960
25	305.897	132.023	5.5	6	1004
26	305.448	131.735	5.5	6	1048
27	305.23	131.501	5.5	6	1092
28	305.294	131.559	5.5	6	1135
29	304.113	131.88	5.5	6	1178
30	305.35	131.564	5.5	6	1221
31	305.257	131.479	5.5	6	1264
32	305.058	131.477	5.5	6	1307
33	305.538	131.324	5.5	6	1350
34	304.861	130.943	5.5	6	1394
35	305.185	130.888	5.5	6	1438
36	304.97	131.251	5.5	6	1482
37	305.27	131.536	5.5	6	1525
38	305.271	131.421	5.5	6	1570
39	305.825	131.179	5.5	6	1614
40	305.44	130.979	5.5	6	1659
41	305.455	130.873	5.5	6	1704
42	305.624	131.001	5.5	6	1750
43	304.827	131.11	5.5	6	1795
44	305.683	131.142	5.5	6	1841
45	304.959	131.052	5.5	6	1886
46	306.138	130.563	5.5	6	1933
47	305.747	130.607	5.5	6	1979
48	306.185	130.762	5.5	6	2025
49	304.853	131.37	5.5	6	2071
50	304.81	131.304	5.5	6	2117
51	305.633	131.395	5.5	6	2163
52	305.934	131.168	5.5	6	2211
53	306.272	131.359	5.5	6	2256
54	306.407	131.892	5.5	6	2301
55	306.872	131.715	5.5	6	2345
56	306.477	132.108	5.5	6	2389
57	307.024	132.145	5.5	6	2433
58	307.249	132.305	5.5	6	2478
59	307.262	132.532	5.5	6	2523
60	307.21	132.497	5.5	6	2568
61	307.38	132.662	5.5	6	2613
62	306.846	132.994	5.5	6	2658
63	307.187	133.12	5.5	6	2704
64	306.698	132.76	5.5	6	2750
65	306.729	132.533	5.5	6	2796
66	305.648	133.034	5.5	6	2842
67	306.308	132.774	5.5	6	2888
68	306.447	132.36	5.5	6	2932
69	306.443	132.673	5.5	6	2977
70	306.352	132.569	5.5	6	3021
71	306.355	132.624	5.5	6	3065
72	306.189	132.109	5.5	6	3109
73	306.189	132.097	5.5	6	3153
74	306.924	131.774	5.5	6	3197
75	306.704	131.887	5.5	6	3241
76	307.577	131.693	5.5	6	3284
77	306.906	131.824	5.5	6	3328
78	307.004	131.609	5.5	6	3373
79	307.119	131.193	5.5	6	3418
80	306.897	131.398	5.5	6	3462
81	307.321	131.189	5.5	6	3506
82	306.34	131.395	5.5	6	3550
83	306.295	131.573	5.5	6	3594
84	306.957	131.329	5.5	6	3639
85	306.984	130.986	5.5	6	3683
86	306.31	131.164	5.5	6	3729
87	306.561	130.962	5.5	6	3773
88	307.901	130.701	5.5	6	3817
89	307.391	130.855	5.5	6	3861
90	307.827	131.074	5.5	6	3907
91	307.715	131.087	5.5	6	3955
92	307.383	131.111	5.5	6	4003
93	307.998	130.977	5.5	6	4052
94	307.887	131.283	5.5	6	4098
95	308.165	131.517	5.5	6	4147
96	307.613	131.924	5.5	6	4195
97	308.141	132.156	5.5	6	4244
98	307.955	132.045	5.5	6	4291
99	308.85	131.94	5.5	6	4338
100	308.845	132.352	5.5	6	4385
101	308.571	132.203	5.5	6	4433
102	307.62	132.802	5.5	6	4481
103	308.102	132.899	5.5	6	4528
104	308.343	133.249	5.5	6	4575
105	308.875	132.991	5.5	6	4623
106	308.301	133.05	5.5	6	4671
107	308.044	132.773	5.5	6	4719
108	308.128	132.628	5.5	6	4766
109	308.197	132.703	5.5	6	4814
110	308.24	132.748	5.5	6	4863
111	307.795	132.364	5.5	6	4911
112	308.236	132.568	5.5	6	4959
113	307.68	132.284	5.5	6	5005
114	308.757	132.026	5.5	6	5053
115	308.389	131.946	5.5	6	5100
116	307.338	132.173	5.5	6	5148
117	307.222	131.856	5.5	6	5199
118	308.142	131.714	5.5	6	5249
119	308.774	131.517	5.5	6	5300
120	307.941	131.885	5.5	6	5351
121	308.235	131.538	5.5	6	5400
122	307.956	131.495	5.5	6	5448
123	307.867	131.449	5.5	6	5498
124	308.379	131.583	5.5	6	5546
125	308.388	131.661	5.5	6	5597
126	308.718	131.334	5.5	6	5649
127	307.941	131.181	5.5	6	5699
128	307.57	131.583	5.5	6	5749
129	309.109	131.244	5.5	6	5801
130	307.66	131.716	5.5	6	5853
131	307.176	131.453	5.5	6	5904
132	307.523	131.412	5.5	6	5954
133	308.466	131.465	5.5	6	6004
134	308.755	131.283	5.5	6	6053
135	309.076	131.569	5.5	6	6103
136	308.753	132.044	5.5	6	6152
137	308.838	132.385	5.5	6	6203
138	308.612	132.409	5.5	6	6255
139	309.612	132.433	5.5	6	6305
140	309.168	133.003	5.5	6	6356
141	308.99	132.827	5.5	6	6408
142	308.938	132.904	5.5	6	6458
143	309.952	133.244	5.5	6	6508
144	309.251	133.379	5.5	6	6558
145	309.303	133.591	5.5	6	6607
146	309.763	133.487	5.5	6	6657
147	310.168	133.148	5.5	6	6705
148	309.898	133.487	5.5	6	6754
149	308.87	133.406	5.5	6	6803
150	309.67	133.187	5.5	6	6852
151	309.232	133.339	5.5	6	6901
152	308.94	133.304	5.5	6	6950
153	308.485	132.874	5.5	6	6999
154	308.858	132.699	5.5	6	7048
155	309.146	132.74	5.5	6	7097
156	308.142	133.136	5.5	6	7146
157	308.796	132.441	5.5	6	7195
158	308.957	132.78	5.5	6	7244
159	308.921	132.342	5.5	6	7293
160	308.905	132.233	5.5	6	7342
161	308.607	132.58	5.5	6	7389
162	309.116	132.142	5.5	6	7438
163	308.795	132.657	5.5	6	7487
164	309.095	132.292	5.5	6	7534
165	309.154	132.263	5.5	6	7582
166	309.36	132.03	5.5	6	7631
167	308.522	131.753	5.5	6	7680
168	308.769	131.601	5.5	6	7729
169	308.452	132.12	5.5	6	7780
170	308.63	132.211	5.5	6	7830
171	308.171	131.874	5.5	6	7880
172	308.136	131.987	5.5	6	7928
173	308.421	131.917	5.5	6	7977
174	308.509	131.793	5.5	6	8025
175	308.024	131.939	5.5	6	8074
176	308.128	131.751	5.5	6	8122
177	307.961	132.042	5.5	6	8171
178	308.455	131.864	5.5	6	8219
179	308.524	132.04	5.5	6	8269
180	309.526	132.075	6.76226	6	8319
181	309.868	132.133	7.14607	6	8368
182	309.558	131.93	6.79689	6	8418
183	309.492	132.807	5.5	6	8466
184	309.72	132.697	7.06066	6	8513
185	310.607	132.982	7.32479	6	8562
186	310.48	133.182	7.4696	6	8611
187	310.135	133.227	7.56747	6	8660
188	310.323	133.182	7.18589	6	8707
189	311.012	133.326	7.24942	6	8755
190	310.872	133.228	7.11318	6	8802
191	310.826	133.343	7.10442	6	8851
192	310.465	133.743	6.95072	6	8900
193	311.059	133.653	7.44759	6	8949
194	311.285	133.536	6.8721	6	8998
195	310.858	133.673	5.5	6	9047
196	311.307	133.294	6.81673	6	9096
197	310.808	133.22	6.91544	6	9146
198	310.511	133.324	5.5	6	9195
199	310.532	133.088	6.94743	6	9242
200	310.305	133.492	5.5	6	9291
201	310.012	132.755	7.10535	6	9339
202	309.717	132.688	7.13072	6	9386
203	309.868	132.663	5.5	6	9433
204	309.795	132.628	6.93263	6	9479
205	309.615	133.171	5.5	6	9527
206	310.149	132.845	7.0182	6	9572
207	309.421	132.665	6.99944	6	9619
208	309.55	132.894	5.5	6	9666
209	309.261	133.218	5.5	6	9712
210	309.785	132.459	7.03723	6	9758
211	309.622	132.677	7.00003	6	9805
212	309.572	132.485	6.97484	6	9852
213	309.005	132.621	7.17156	6	9898
1	367.73	156.971	5.5	7	6
2	367.552	157.236	5.5	7	45
3	367.932	157.128	5.5	7	84
4	368.424	157.046	5.5	7	123
5	368.656	157.031	5.5	7	163
6	369.044	157.517	5.5	7	202
7	369.275	157.812	5.5	7	242
8	369.469	157.825	5.5	7	283
9	369.224	157.814	5.5	7	323
10	369.435	157.979	5.5	7	364
11	369.443	158.021	5.5	7	406
12	369.823	158.405	5.5	7	447
13	370.056	158.429	5.5	7	490
14	370.143	158.4	5.5	7	532
15	370.465	158.201	5.5	7	574
16	370.481	158.553	5.5	7	616
17	370.389	158.912	5.5	7	658
18	370.378	158.768	5.5	7	701
19	370.759	158.54	5.5	7	743
20	370.09	158.596	5.5	7	786
21	369.698	159.016	5.5	7	830
22	369.98	158.369	5.5	7	874
23	369.738	158.129	5.5	7	917
24	369.746	157.948	5.5	7	961
25	369.525	158.041	5.5	7	1005
26	369.323	158.002	5.5	7	1049
27	368.99	158.264	5.5	7	1093
28	369.344	158.23	5.5	7	1136
29	369.584	158.016	5.5	7	1179
30	369.515	157.985	5.5	7	1222
31	369.36	158.124	5.5	7	1265
32	369.396	158.075	5.5	7	1308
33	369.371	157.999	5.5	7	1351
34	369.267	158.025	5.5	7	1395
35	368.786	157.715	5.5	7	1439
36	368.699	157.864	5.5	7	1483
37	368.877	157.836	5.5	7	1526
38	369.329	157.617	5.5	7	1571
39	368.746	157.704	5.5	7	1615
40	368.708	157.59	5.5	7	1660
41	368.548	157.969	5.5	7	1705
42	368.563	157.761	5.5	7	1751
43	368.841	158.109	5.5	7	1796
44	368.652	157.906	5.5	7	1842
45	368.874	157.843	5.5	7	1887
46	368.723	157.89	5.5	7	1934
47	368.844	157.559	5.5	7	1980
48	368.89	157.785	5.5	7	2026
49	369.366	157.836	5.5	7	2072
50	369.579	157.928	5.5	7	2118
51	369.577	158.286	5.5	7	2164
52	369.858	158.642	5.5	7	2212
53	369.919	159.073	5.5	7	2257
54	370.128	159.452	5.5	7	2302
55	370.222	159.236	5.5	7	2346
56	370.565	159.265	5.5	7	2390
57	370.664	159.53	5.5	7	2434
58	370.595	159.542	5.5	7	2479
59	370.615	160.048	5.5	7	2524
60	370.494	160.003	5.5	7	2569
61	370.667	160.373	5.5	7	2614
62	370.634	160.399	5.5	7	2659
63	371.031	160.321	5.5	7	2705
64	370.84	160.52	5.5	7	2751
65	370.629	160.289	5.5	7	2797
66	370.439	160.259	5.5	7	2843
67	370.445	160.187	5.5	7	2889
68	370.407	160.428	5.5	7	2933
69	370.368	160.222	5.5	7	2978
70	370.327	160.095	5.5	7	3022
71	370.333	160.356	5.5	7	3066
72	370.219	160.151	5.5	7	3110
73	369.965	160.477	5.5	7	3154
74	370.073	160.714	5.5	7	3198
75	370.224	160.518	5.5	7	3242
76	370.03	160.285	5.5	7	3285
77	369.949	160.055	5.5	7	3329
78	369.757	160.049	5.5	7	3374
79	369.925	160.082	5.5	7	3419
80	369.743	160.026	5.5	7	3463
81	369.734	160.198	5.5	7	3507
82	369.531	160.044	5.5	7	3551
83	369.852	159.712	5.5	7	3595
84	369.822	159.464	5.5	7	3640
85	369.671	159.701	5.5	7	3684
86	369.415	159.668	5.5	7	3730
87	369.484	159.838	5.5	7	3774
88	369.314	159.709	5.5	7	3818
89	369.054	159.819	5.5	7	3862
90	369.4	159.673	5.5	7	3908
91	369.38	159.716	5.5	7	3956
92	369.929	159.975	5.5	7	4004
93	369.982	159.975	5.5	7	4053
94	369.898	160.201	5.5	7	4099
95	370.157	160.53	5.5	7	4148
96	370.489	160.645	5.5	7	4196
97	370.483	160.921	5.5	7	4245
98	370.76	161.159	5.5	7	4292
99	370.765	161.195	5.5	7	4339
100	371.055	161.38	5.5	7	4386
101	371.326	161.354	5.5	7	4434
102	370.842	161.681	5.5	7	4482
103	371.168	161.74	5.5	7	4529
104	371.768	161.449	5.5	7	4576
105	371.654	161.49	5.5	7	4624
106	371.34	161.573	5.5	7	4672
107	371.341	161.743	5.5	7	4720
108	370.752	161.885	5.5	7	4767
109	370.756	161.647	5.5	7	4815
110	370.894	161.568	5.5	7	4864
111	370.946	161.773	5.5	7	4912
112	371.736	161.192	5.5	7	4960
113	371.816	161.052	5.5	7	5006
114	371.819	160.954	5.5	7	5054
115	371.889	160.859	5.5	7	5101
116	371.756	160.617	5.5	7	5149
117	372.042	160.44	5.5	7	5200
118	372.172	160.399	5.5	7	5250
119	371.95	160.315	5.5	7	5301
120	371.415	160.534	5.5	7	5352
121	371.24	160.862	5.5	7	5401
122	370.613	160.55	5.5	7	5449
123	370.132	160.808	5.5	7	5499
124	369.607	160.744	5.5	7	5547
125	369.4	160.725	5.5	7	5598
126	369.385	160.536	5.5	7	5650
127	369.497	160.544	5.5	7	5700
128	369.161	160.907	5.5	7	5750
129	369.121	160.855	5.5	7	5802
130	369.741	160.473	5.5	7	5854
131	369.897	160.356	5.5	7	5905
132	369.584	160.361	5.5	7	5955
133	369.875	160.444	5.5	7	6005
134	369.623	160.715	5.5	7	6054
135	369.77	161.234	5.5	7	6104
136	369.202	161.742	5.5	7	6153
137	369.25	161.975	5.5	7	6204
138	369.554	161.732	5.5	7	6256
139	369.811	161.863	5.5	7	6306
140	370.259	162.238	5.5	7	6357
141	369.669	162.229	6.98005	7	6410
142	369.926	162.686	5.5	7	6459
143	368.74	163.141	8.05936	7	6509
144	369.568	163.047	7.19689	7	6559
145	367.83	164.004	7.69009	7	6608
147	369.413	163.114	7.63674	7	6707
148	370.033	163.199	7.16819	7	6755
149	370.509	162.876	5.5	7	6804
150	369.54	162.757	7.07469	7	6853
151	370.732	162.427	5.5	7	6902
152	370.379	162.313	5.5	7	6951
153	369.138	162.798	5.5	7	7000
154	369.396	162.609	5.5	7	7049
155	369.876	162.348	5.5	7	7098
156	370.217	162.136	5.5	7	7147
157	370.241	161.901	5.5	7	7196
158	369.975	161.922	5.5	7	7245
159	370.05	161.696	5.5	7	7294
160	370.058	161.82	5.5	7	7343
161	369.492	161.627	5.5	7	7390
162	369.129	162.3	5.5	7	7439
163	369.366	161.725	5.5	7	7488
164	368.814	161.703	6.89726	7	7535
165	368.987	162.111	5.5	7	7583
166	369.655	161.331	5.5	7	7632
167	369.635	161.383	5.5	7	7681
168	369.6	161.47	5.5	7	7730
169	369.798	161.344	5.5	7	7781
170	369.722	161.256	5.5	7	7831
171	369.388	161.226	6.80838	7	7882
172	369.66	161.129	5.5	7	7929
173	369.596	161.123	5.5	7	7978
174	368.646	161.724	5.5	7	8026
175	367.78	162.19	7.1335	7	8075
176	368.617	161.58	5.5	7	8123
177	369.432	161.275	5.5	7	8172
178	369.525	161.356	5.5	7	8220
179	368.779	161.966	7.111	7	8270
180	369.103	162.135	7.9804	7	8320
181	368.449	162.618	8.17515	7	8369
182	368.652	162.904	8.08009	7	8419
183	368.583	163.165	8.49187	7	8467
184	367.838	163.822	8.20555	7	8514
1	416.75	200.15	5.5	8	7
2	416.903	200.199	5.5	8	46
3	416.973	200.062	5.5	8	85
4	416.922	200.315	5.5	8	124
5	417.359	200.706	5.5	8	164
6	417.704	200.988	5.5	8	203
7	417.987	201.317	5.5	8	243
8	417.929	201.53	5.5	8	284
9	418.088	201.601	5.5	8	324
10	418.147	201.725	5.5	8	365
11	418.542	202.142	5.5	8	407
12	418.539	202.13	5.5	8	448
13	418.6	202.19	5.5	8	491
14	418.686	202.156	5.5	8	533
15	418.444	202.049	5.5	8	575
16	418.476	202.123	5.5	8	617
17	418.65	202.28	5.5	8	659
18	418.601	202.388	5.5	8	702
19	418.635	202.57	5.5	8	744
20	418.401	202.436	5.5	8	787
21	418.391	202.346	5.5	8	831
22	418.169	202.242	5.5	8	875
23	418.185	202.119	5.5	8	918
24	418.167	202.14	5.5	8	962
25	417.922	201.841	5.5	8	1006
26	417.878	201.758	5.5	8	1050
27	417.726	201.752	5.5	8	1094
28	417.797	201.908	5.5	8	1137
29	417.92	201.848	5.5	8	1180
30	417.769	201.617	7.00638	8	1224
31	417.614	201.543	6.9368	8	1267
32	417.637	201.744	6.81466	8	1310
33	417.766	201.764	5.5	8	1352
34	417.735	201.896	5.5	8	1396
35	417.425	201.69	5.5	8	1440
36	417.333	201.706	5.5	8	1484
37	417.312	201.477	6.898	8	1528
38	417.126	201.374	5.5	8	1572
39	417.176	201.399	5.5	8	1616
40	417.088	201.147	6.95618	8	1662
41	416.851	201.016	6.84061	8	1707
42	416.883	201.06	7.14961	8	1753
43	416.781	200.973	6.85061	8	1798
44	416.813	200.878	7.1084	8	1844
45	416.815	200.915	5.5	8	1888
46	416.991	201.063	5.5	8	1935
47	417.006	200.874	7.12249	8	1982
48	416.938	200.931	7.29979	8	2028
49	417.34	201.355	7.28632	8	2074
50	417.872	201.676	7.60962	8	2120
51	418.017	201.924	8.22084	8	2166
52	418.209	202.084	8.18758	8	2214
53	418.373	202.247	8.40384	8	2259
54	418.612	202.509	8.46878	8	2303
55	418.503	202.665	8.3297	8	2347
56	418.686	202.748	8.41425	8	2391
57	418.981	202.965	8.60595	8	2436
58	419.005	203.122	8.30366	8	2481
59	419.278	203.246	8.66004	8	2526
60	419.11	203.234	8.80698	8	2571
61	419.318	203.493	9.24097	8	2615
62	419.303	203.607	9.07772	8	2661
63	419.278	203.602	9.05868	8	2707
64	419.235	203.536	8.99358	8	2753
65	419.095	203.4	8.74155	8	2799
66	419.262	203.512	8.58097	8	2845
67	419.364	203.529	8.90437	8	2891
68	419.421	203.635	8.91259	8	2935
69	419.431	203.481	8.73451	8	2980
70	419.286	203.424	8.91194	8	3024
71	419.329	203.37	9.08017	8	3068
72	419.322	203.326	8.42505	8	3112
73	419.458	203.213	8.34116	8	3156
74	419.569	203.327	8.44434	8	3200
75	419.48	203.279	8.53183	8	3243
76	419.382	203.126	8.60966	8	3287
77	419.402	203.012	8.92124	8	3331
78	419.388	203.018	8.73077	8	3377
79	419.511	203.039	8.66128	8	3421
80	419.581	203.06	8.57181	8	3465
81	419.753	203.115	8.57898	8	3509
82	419.832	203.176	8.62238	8	3553
83	419.574	203.012	8.88505	8	3597
84	419.28	202.684	9.15299	8	3643
85	419.349	202.53	9.25984	8	3687
86	419.426	202.676	8.91229	8	3732
87	419.948	202.93	9.03109	8	3776
88	420.529	203.322	9.06651	8	3820
89	420.434	203.308	9.25911	8	3865
90	420.109	203.146	9.47279	8	3911
91	420.134	202.91	9.19976	8	3958
92	420.062	203.08	9.31821	8	4007
93	420.499	203.402	9.40832	8	4056
94	420.359	203.464	9.53118	8	4103
95	420.212	203.497	9.73913	8	4152
96	420.642	203.829	10.1766	8	4199
97	420.629	204.096	10.1985	8	4248
98	420.611	204.093	10.3027	8	4295
99	420.903	204.412	10.2503	8	4342
100	421.431	204.83	10.2416	8	4389
101	421.449	205.148	9.95443	8	4437
102	421.474	205.035	10.1571	8	4485
103	421.669	205.309	10.2858	8	4532
104	421.517	205.229	10.4348	8	4580
105	421.708	205.495	10.2907	8	4628
106	421.806	205.58	9.94609	8	4676
107	421.95	205.562	10.0488	8	4724
108	421.918	205.684	10.1034	8	4772
109	422.142	205.924	10.0678	8	4820
110	422.536	206.276	10.2471	8	4868
111	422.627	206.423	10.146	8	4917
112	423.392	206.944	10.1586	8	4964
113	423.733	207.073	10.1826	8	5011
114	423.396	206.777	10.0433	8	5059
115	423.103	206.627	10.1592	8	5106
116	423.031	206.53	10.3025	8	5154
117	422.834	206.067	10.2269	8	5205
118	422.121	205.472	10.0866	8	5255
119	422.442	205.777	9.99523	8	5306
120	422.698	205.898	10.0493	8	5357
121	422.607	205.776	10.2029	8	5406
122	422.651	205.956	10.3031	8	5455
123	422.917	206.116	10.3716	8	5504
124	422.79	206.083	10.283	8	5552
125	423.278	206.345	10.2756	8	5603
126	423.662	206.551	10.0922	8	5655
127	424.01	207	10.2203	8	5705
128	424.05	206.96	10.3308	8	5756
129	423.899	206.701	10.3341	8	5807
130	423.507	206.299	10.5403	8	5858
131	423.015	205.875	10.6342	8	5909
132	422.847	205.674	10.4692	8	5960
133	423	205.861	10.3257	8	6009
134	423.13	206.114	10.6227	8	6058
135	423.664	206.637	10.8449	8	6108
136	424.276	207.449	10.9793	8	6158
137	424.536	207.786	11.0126	8	6209
138	424.646	208.035	10.9498	8	6261
139	424.904	208.139	11.308	8	6311
140	425.234	208.533	11.0905	8	6362
141	425.336	208.602	10.9988	8	6414
142	425.379	208.653	10.9927	8	6463
143	425.282	208.616	11.1437	8	6513
144	425.43	208.75	11.1757	8	6563
145	425.472	208.854	11.1065	8	6612
146	425.437	208.688	11.271	8	6661
147	425.477	208.793	11.1832	8	6710
148	425.428	208.648	11.2075	8	6759
149	425.387	208.844	11.4154	8	6808
150	425.361	208.789	11.3054	8	6857
151	425.491	208.752	11.0475	8	6906
152	425.308	208.761	11.1979	8	6955
153	425.398	208.764	10.9375	8	7004
154	425.482	208.993	11.0672	8	7053
155	425.346	208.645	11.0074	8	7102
156	425.621	208.843	10.9768	8	7151
157	425.699	208.933	10.9314	8	7200
158	425.666	208.783	10.9851	8	7249
159	425.897	208.982	10.9049	8	7298
160	425.778	208.726	11.1049	8	7347
161	425.777	208.797	10.999	8	7394
162	425.537	208.682	11.0161	8	7443
163	425.264	208.419	11.189	8	7492
164	425.405	208.549	11.2125	8	7539
165	425.682	208.779	11.1562	8	7588
166	425.419	208.597	11.182	8	7637
167	425.473	208.537	11.2832	8	7685
168	425.324	208.487	11.305	8	7735
169	425.115	208.327	11.2771	8	7786
170	425.281	208.527	11.2873	8	7836
171	425.244	208.459	11.5495	8	7886
172	425.183	208.388	11.3535	8	7933
173	425.103	208.396	11.5676	8	7983
174	425.108	208.405	11.6018	8	8030
175	425.156	208.653	11.5555	8	8079
176	425.218	208.546	11.5931	8	8127
177	425.25	208.576	11.5178	8	8176
178	425.398	208.658	11.5667	8	8225
179	425.587	208.711	11.5931	8	8275
180	425.813	208.868	11.8276	8	8326
181	426.063	209.127	11.734	8	8374
182	426.362	209.585	11.8881	8	8425
183	426.599	209.707	12.0552	8	8474
184	427.139	210.19	12.1678	8	8521
185	427.003	210.004	12.1217	8	8567
186	427.113	210.145	12.183	8	8617
187	427.471	210.625	12.2528	8	8667
188	427.503	210.557	12.0628	8	8714
189	427.829	210.946	12.093	8	8760
190	427.984	211.131	12.1292	8	8809
191	427.951	211.035	12.2019	8	8858
192	427.555	210.887	12.4023	8	8907
193	427.135	210.603	12.2892	8	8957
194	426.694	210.194	12.0888	8	9005
195	426.693	210.238	11.9869	8	9055
196	427.12	210.47	12.026	8	9105
197	427.167	210.584	12.0738	8	9154
198	427.2	210.608	11.9336	8	9203
199	427.088	210.16	11.913	8	9250
200	427.044	210.12	11.8312	8	9299
201	427.058	210.011	12.0202	8	9345
202	426.871	209.952	11.8927	8	9392
203	426.852	209.917	11.8802	8	9440
204	426.714	210.172	12.0384	8	9487
205	426.498	210.084	12.1278	8	9534
206	426.456	210.204	12.1015	8	9580
207	426.742	210.246	12.0606	8	9627
208	426.842	210.268	12.1738	8	9674
209	426.89	210.324	12.2454	8	9719
210	426.781	210.417	12.2275	8	9766
211	426.92	210.393	12.3784	8	9813
212	426.781	210.199	12.2975	8	9860
213	426.592	210.066	12.2294	8	9905
214	426.344	209.863	12.1103	8	9952
215	426.264	209.75	12.0751	8	9998
216	426.35	209.755	12.1941	8	10046
217	426.443	209.593	12.1851	8	10092
218	426.418	209.392	12.2763	8	10139
219	426.4	209.187	12.2971	8	10186
220	426.439	209.054	12.1806	8	10233
221	426.319	208.934	12.1093	8	10280
222	426.497	209.234	12.2465	8	10327
223	426.454	209.321	12.4278	8	10373
224	426.48	209.579	12.5435	8	10420
225	426.64	209.835	12.6656	8	10464
226	426.811	210.226	12.8192	8	10510
227	427.043	210.595	12.9299	8	10556
228	427.149	211.103	12.9786	8	10602
229	427.529	211.795	13.0761	8	10647
230	427.241	211.961	13.0137	8	10692
231	427.857	211.729	13.1647	8	10737
232	427.455	210.786	13.3578	8	10781
233	428.096	210.965	13.3354	8	10824
234	428.524	211.492	13.2837	8	10867
1	270.274	253.696	5.5	9	8
2	270.309	253.432	5.5	9	47
3	270.561	253.122	5.5	9	86
4	270.619	253.46	5.5	9	125
5	270.78	253.803	5.5	9	165
6	271.173	254.297	5.5	9	221
7	271.311	253.703	5.5	9	244
8	271.322	254.465	5.5	9	303
9	271.505	254.348	5.5	9	344
10	271.6	254.169	5.5	9	386
11	271.569	254.243	5.5	9	428
12	271.887	254.312	5.5	9	469
13	272.151	254.079	5.5	9	511
14	271.973	254.549	5.5	9	553
15	271.958	255.099	5.5	9	595
16	272.209	254.665	5.5	9	636
17	272.115	254.916	5.5	9	677
18	272.297	254.961	5.5	9	720
19	272.045	254.656	5.5	9	765
20	271.773	254.624	5.5	9	809
21	272.037	254.373	5.5	9	853
22	271.653	254.368	5.5	9	894
23	271.544	254.379	5.5	9	939
24	271.55	254.736	5.5	9	983
25	271.629	254.211	5.5	9	1027
26	271.644	254.276	5.5	9	1071
27	271.554	254.393	5.5	9	1114
28	271.64	254.234	5.5	9	1157
29	271.532	253.829	5.5	9	1181
30	271.86	253.785	5.5	9	1223
31	271.716	253.682	5.5	9	1266
32	271.768	253.875	5.5	9	1309
33	271.685	253.544	5.5	9	1353
34	271.618	253.837	5.5	9	1397
35	271.004	253.754	5.5	9	1441
36	271.14	253.591	5.5	9	1485
37	271.146	253.503	5.5	9	1527
38	271.202	253.564	5.5	9	1573
39	270.96	253.133	5.5	9	1617
40	271.22	253.207	5.5	9	1661
41	271.111	253.104	5.5	9	1706
42	271.186	252.681	5.5	9	1752
43	271.094	253.143	5.5	9	1797
44	271.06	253.019	5.5	9	1843
45	271.161	252.912	5.5	9	1889
46	271.063	252.963	5.5	9	1936
47	271.106	253.198	5.5	9	1981
48	271.167	252.589	5.5	9	2027
49	271.551	252.902	5.5	9	2073
50	271.666	253.118	5.5	9	2119
51	271.932	253.231	5.5	9	2165
52	272.346	253.906	5.5	9	2213
53	272.28	254.035	5.5	9	2278
54	272.358	254.49	5.5	9	2323
55	272.244	255.218	5.5	9	2366
56	272.452	255.382	5.5	9	2411
57	272.625	255.399	6.93895	9	2458
58	272.948	254.929	5.5	9	2501
59	272.899	254.65	5.5	9	2546
60	273.251	254.663	5.5	9	2589
61	273.319	254.583	5.5	9	2635
62	272.758	255.015	7.25493	9	2683
63	273.468	254.364	5.5	9	2727
64	273.318	255.277	6.96778	9	2775
65	273.578	254.64	5.5	9	2819
66	273.231	255.23	7.21959	9	2867
67	272.896	255.165	7.03158	9	2911
68	272.952	255.253	7.2512	9	2956
69	273.166	255.267	7.747	9	3000
70	273.412	255.171	7.51414	9	3045
71	273.556	254.728	5.5	9	3087
72	273.46	253.982	5.5	9	3131
73	273.301	254.537	7.42113	9	3177
74	273.257	254.299	7.21601	9	3220
75	273.154	254.24	7.77682	9	3264
76	273.061	254.416	7.3227	9	3308
77	273.012	254.585	7.08758	9	3353
78	273.109	253.713	5.5	9	3375
79	272.854	254.203	7.13859	9	3441
80	272.994	254.461	7.61602	9	3485
81	272.945	254.171	7.64108	9	3529
82	273.005	254.142	7.54295	9	3573
83	272.928	254.257	7.07001	9	3618
84	273.294	253.723	5.5	9	3641
85	273.065	254.036	7.54561	9	3708
86	272.954	253.863	7.30494	9	3733
87	273.036	253.998	7.56321	9	3797
88	273.069	253.879	7.00939	9	3821
89	273.024	253.753	7.56506	9	3864
90	273.126	253.677	7.29524	9	3910
91	272.544	252.485	8.44898	9	3959
92	272.448	252.465	8.2054	9	4006
93	272.834	253.158	8.33966	9	4055
94	272.973	253.576	8.19679	9	4102
95	273.207	253.71	9.05729	9	4151
96	273.516	254.008	8.66408	9	4223
97	274.003	254.191	8.929	9	4271
98	274.202	254.837	9.10521	9	4318
99	274.12	255.239	9.31561	9	4366
100	274.762	255.227	9.04666	9	4411
101	274.95	255.752	8.64002	9	4459
102	274.845	255.615	8.45347	9	4508
103	274.703	255.664	8.18878	9	4556
104	274.089	254.554	9.57726	9	4603
105	273.606	253.905	9.68946	9	4630
106	273.939	254.41	8.46947	9	4699
107	273.305	253.943	9.45304	9	4726
108	273.601	254.284	8.9883	9	4794
109	273.54	254.537	8.79536	9	4843
110	273.327	254.294	8.43218	9	4891
111	273.272	254.387	8.16583	9	4939
112	273.323	254.055	8.40025	9	4985
113	273.546	254.411	8.1548	9	5033
114	273.641	254.481	7.63688	9	5080
115	273.531	254.588	7.97368	9	5128
116	273.556	254.602	8.13118	9	5178
117	273.685	254.564	8.13573	9	5229
118	273.766	254.574	8.18255	9	5280
119	273.74	254.392	8.32922	9	5331
120	273.683	254.296	8.7306	9	5381
121	273.683	254.276	8.78697	9	5430
122	273.604	254.158	8.19344	9	5479
123	273.507	254.401	7.75494	9	5529
124	273.366	254.242	7.53901	9	5578
125	273.552	254.048	7.66671	9	5628
126	273.478	253.958	7.93696	9	5652
127	273.51	254.203	7.61042	9	5729
128	273.366	254.607	7.56704	9	5780
129	273.174	254.696	6.79084	9	5831
130	273.379	254.418	7.33992	9	5882
131	273.565	254.181	7.59962	9	5933
132	273.641	254.005	7.72398	9	5983
133	273.64	253.983	7.79535	9	6033
134	273.456	254.068	7.43653	9	6082
135	273.431	254.255	8.25967	9	6131
136	273.495	254.245	8.33397	9	6181
137	273.736	254.655	8.27151	9	6232
138	274.023	254.79	7.31829	9	6284
139	274.287	255.194	8.23131	9	6334
140	274.443	255.514	8.19367	9	6385
141	274.469	255.554	8.45532	9	6435
142	274.613	255.616	8.80604	9	6485
143	274.713	255.65	8.51694	9	6536
144	274.935	255.95	8.6075	9	6584
145	274.922	256.041	8.52859	9	6634
146	274.916	256.041	8.38971	9	6683
147	275.036	256.055	8.38872	9	6732
148	275.036	255.967	8.47004	9	6781
149	274.813	255.841	8.43749	9	6830
150	274.735	255.779	8.53835	9	6879
151	274.987	255.173	8.5084	9	6929
152	275.008	255.187	8.27984	9	6978
153	274.774	255.233	8.42419	9	7027
154	274.794	255.215	8.32994	9	7076
155	274.711	255.38	8.38878	9	7125
156	274.651	255.031	8.309	9	7174
157	274.531	255.191	8.41387	9	7223
158	274.603	255.125	8.66918	9	7272
159	274.658	254.952	8.38327	9	7322
160	274.845	254.862	8.34948	9	7368
161	274.85	254.971	8.33902	9	7418
162	274.407	255.248	9.32017	9	7467
163	274.635	255.406	9.77894	9	7515
164	274.578	255.465	9.47926	9	7563
165	274.901	255.261	8.9266	9	7611
166	274.186	255.241	9.47086	9	7661
167	274.245	255.259	9.87859	9	7708
168	274.48	255.122	9.64372	9	7758
169	274.533	255.066	9.83589	9	7811
170	274.433	254.863	9.37674	9	7861
171	274.522	254.588	8.88133	9	7907
172	274.435	254.593	8.79066	9	7957
173	274.15	255.085	9.3198	9	8004
174	274.189	254.862	9.59639	9	8054
175	274.071	254.954	9.40293	9	8102
176	274.073	254.636	9.33322	9	8152
177	274.274	254.828	9.76805	9	8200
178	274.412	255.209	9.48449	9	8249
179	274.353	255.917	9.46629	9	8298
180	274.698	255.725	9.47246	9	8346
181	274.795	256.087	9.58963	9	8395
182	274.722	256.365	9.65202	9	8443
183	274.733	256.197	9.57679	9	8492
184	274.841	256.365	9.60143	9	8539
185	274.92	256.644	9.59767	9	8586
186	275.117	256.788	9.62268	9	8636
187	275.442	257.023	9.91087	9	8685
188	275.539	257.086	9.785	9	8732
189	275.575	257.293	9.70974	9	8779
190	275.847	257.108	9.57056	9	8829
191	275.749	257.363	9.4065	9	8878
192	275.659	257.334	9.76901	9	8927
193	275.547	257.202	9.8662	9	8975
194	275.73	257.281	9.89102	9	9024
195	275.749	257.197	9.72787	9	9073
196	275.735	257.091	9.42708	9	9124
197	276.061	256.4	8.8427	9	9171
198	275.82	256.121	8.73013	9	9219
199	275.819	256.105	9.05323	9	9266
200	275.975	256.056	8.73919	9	9315
201	275.545	256.21	9.32373	9	9362
202	275.31	256.192	9.46032	9	9410
203	275.539	255.789	8.81714	9	9456
204	275.636	255.661	8.75609	9	9503
205	275.665	255.465	8.86319	9	9550
206	275.659	255.697	9.17835	9	9596
207	275.55	255.593	8.98231	9	9643
208	275.457	255.477	8.88329	9	9689
209	275.433	255.35	9.17369	9	9735
210	275.522	255.261	8.75724	9	9782
211	275.539	255.274	9.08309	9	9829
212	275.525	254.943	9.02072	9	9876
213	275.046	255.442	9.33557	9	9924
214	274.92	255.485	9.38652	9	9972
215	275.161	255.139	9.04336	9	10017
216	274.637	255.435	9.36349	9	10066
217	275.06	254.914	8.90132	9	10111
218	275.05	254.629	8.93484	9	10158
219	274.84	255.206	9.65456	9	10206
220	275.053	255.201	9.4789	9	10253
221	274.914	255.473	9.82963	9	10300
222	274.973	255.599	9.88761	9	10345
223	274.867	255.752	9.82398	9	10392
224	275.052	255.829	9.85167	9	10439
225	275.115	255.887	9.75951	9	10483
226	275.252	256.322	9.90061	9	10527
227	275.447	256.361	10.0153	9	10572
228	275.566	256.573	10.2937	9	10617
229	275.852	257.04	10.3859	9	10662
230	276.007	257.193	10.4749	9	10708
231	276.159	257.205	10.5313	9	10752
232	276.3	257.096	10.4644	9	10795
233	276.316	257.212	10.3142	9	10837
234	276.378	257.449	10.3913	9	10881
1	277.047	214.811	8.89349	10	9
2	277.07	214.646	8.82465	10	48
3	276.939	214.983	8.99188	10	87
4	276.961	215.182	8.95914	10	126
5	277.368	214.644	9.25105	10	168
6	277.651	214.733	9.46914	10	206
7	278.048	214.819	9.80532	10	247
8	278.087	215.31	9.77077	10	287
9	278.075	215.468	9.73611	10	328
10	278.202	215.556	9.80716	10	369
11	278.184	215.553	9.88168	10	411
12	278.328	215.776	9.96023	10	453
13	278.562	215.464	10.0679	10	495
14	278.481	215.679	10.1458	10	537
15	278.918	215.602	10.297	10	579
16	278.862	216.184	10.1976	10	621
17	278.874	216.27	10.1061	10	663
18	278.458	215.961	10.0499	10	706
19	278.471	216.031	9.64041	10	748
20	278.402	215.67	9.96506	10	791
21	278.463	215.463	9.87688	10	835
22	278.359	215.689	9.85308	10	879
23	278.09	215.767	9.61079	10	921
24	277.985	215.701	9.66706	10	965
25	278.132	215.41	9.66562	10	1009
26	278.215	215.358	9.49009	10	1053
27	278.144	215.072	9.92593	10	1097
28	278.155	215.099	9.97766	10	1140
29	277.961	215.384	10.0134	10	1184
30	278.2	215.415	10.2037	10	1227
31	277.763	215.232	10.1245	10	1270
32	277.961	216.04	9.73836	10	1311
33	278	215.058	10.2055	10	1355
34	278.163	215.026	9.91599	10	1399
35	277.955	215.085	9.84858	10	1444
36	277.886	215.194	10.1864	10	1488
37	277.687	214.708	10.4353	10	1530
38	277.448	214.833	10.228	10	1576
39	277.461	214.933	10.2762	10	1620
40	277.678	214.653	10.2127	10	1665
41	277.813	215.11	10.2818	10	1709
42	277.779	214.935	10.5307	10	1755
43	277.502	214.647	10.4398	10	1800
44	277.571	215.109	10.2628	10	1846
45	277.557	214.837	10.3122	10	1892
46	277.492	214.688	10.4322	10	1938
47	277.61	214.54	10.4695	10	1984
48	277.714	214.751	10.6829	10	2030
49	277.976	214.85	10.7695	10	2076
50	278.186	215.112	11.052	10	2122
51	278.097	215.504	10.8963	10	2169
52	278.285	215.51	11.0801	10	2215
53	278.686	215.596	11.255	10	2261
54	278.9	215.597	11.2589	10	2304
55	279.008	215.749	11.2342	10	2350
56	279.005	216.37	11.2873	10	2393
57	279.03	216.413	11.4373	10	2437
58	279.124	216.613	11.3844	10	2482
59	279.315	216.204	11.468	10	2528
60	279.01	214.386	11.8713	10	2576
61	279.057	214.185	12.0382	10	2620
62	279.096	214.424	11.8508	10	2667
63	279.264	214.588	11.9483	10	2712
64	279.098	216.236	11.4107	10	2755
65	278.997	216.01	11.5895	10	2801
66	279.01	216.092	11.633	10	2847
67	278.912	216.125	11.6414	10	2892
68	279.074	216.012	11.6802	10	2937
69	279.015	216.102	11.4928	10	2981
70	278.619	216.15	11.5617	10	3025
71	278.519	216.312	11.4978	10	3069
72	278.528	215.783	11.5619	10	3114
73	278.316	216.107	11.467	10	3158
74	278.719	215.467	11.4428	10	3202
75	278.727	215.069	11.5695	10	3246
76	278.762	215.693	11.3337	10	3290
77	278.527	215.295	11.4621	10	3334
78	278.369	215.589	11.2887	10	3380
79	278.453	215.514	11.3356	10	3424
80	278.344	215.229	11.4696	10	3467
81	278.496	215.587	11.3801	10	3511
82	278.683	215.271	11.6307	10	3554
83	278.626	215.595	11.602	10	3599
84	278.636	215.595	11.6713	10	3645
85	278.618	215.52	11.6492	10	3688
86	278.641	214.124	11.9111	10	3737
87	278.453	215.196	11.7451	10	3778
88	278.485	214.607	11.6176	10	3823
89	278.887	214.411	11.768	10	3870
90	278.645	214.388	11.8253	10	3917
91	278.568	214.586	11.8756	10	3965
92	278.592	214.233	11.8965	10	4013
93	278.876	214.436	12.0638	10	4061
94	278.877	214.512	12.3525	10	4108
95	278.988	214.577	12.5157	10	4156
96	279.157	214.81	12.5816	10	4204
97	279.527	215.482	12.612	10	4253
98	279.45	215.786	12.5973	10	4300
99	279.588	215.524	12.5692	10	4347
100	279.914	215.425	12.6581	10	4394
101	280.448	216.884	12.4915	10	4442
102	280.524	216.702	12.4842	10	4490
103	280.702	216.436	12.5979	10	4537
104	280.458	216.992	12.5641	10	4585
105	280.418	216.87	12.587	10	4634
106	280.319	216.76	12.5702	10	4681
107	280.473	216.882	12.6997	10	4730
108	280.564	216.414	12.6972	10	4776
109	280.301	217.164	12.6278	10	4825
110	280.234	216.791	12.6322	10	4873
111	280.019	217.037	12.3754	10	4922
112	279.842	216.383	12.2402	10	4968
113	279.791	215.855	12.233	10	5016
114	279.643	215.813	12.5377	10	5063
115	279.882	215.929	12.446	10	5110
116	279.84	215.765	12.6115	10	5159
117	279.535	215.441	12.5122	10	5210
118	279.337	215.332	12.6413	10	5260
119	279.331	215.369	12.6576	10	5311
120	279.171	215.06	12.8289	10	5362
121	279.244	214.655	12.8663	10	5410
122	279.308	215.162	12.8156	10	5460
123	279.288	214.805	12.9312	10	5510
124	279.214	215.099	12.8162	10	5558
125	279.165	215.153	12.6293	10	5608
126	279.033	214.61	12.7791	10	5660
127	279.128	214.936	12.761	10	5710
128	279.174	214.599	12.9427	10	5760
129	279.443	214.379	12.7855	10	5812
130	279.5	214.468	12.8893	10	5863
131	279.269	214.299	12.7436	10	5914
132	279.062	213.891	12.9146	10	5964
133	278.701	213.449	13.0757	10	6014
134	278.251	212.342	13.3466	10	6063
135	278.382	212.386	13.378	10	6112
136	278.166	212.691	13.4511	10	6163
137	278.409	212.96	13.5148	10	6214
138	278.349	213.104	13.5651	10	6266
139	278.879	213.808	13.5745	10	6315
140	278.939	213.563	13.6705	10	6367
141	278.923	213.723	13.704	10	6418
142	279.05	213.745	13.7968	10	6468
143	279.386	214.237	13.6493	10	6518
144	279.71	214.647	13.6184	10	6567
145	279.707	215.244	13.5864	10	6615
146	280.106	215.881	13.5789	10	6664
147	280.359	216.096	13.5144	10	6713
148	280.354	216.352	13.4144	10	6763
149	280.518	216.507	13.6632	10	6811
150	280.291	215.799	13.6553	10	6861
151	279.969	216.14	13.4444	10	6910
152	279.761	216.258	13.3637	10	6958
153	279.871	216.568	13.3259	10	7008
154	280.114	215.695	13.5867	10	7057
155	280.276	215.027	13.662	10	7106
156	280.61	213.707	14.0143	10	7155
157	280.876	213.545	13.8061	10	7204
158	281.082	213.784	14.1037	10	7253
159	280.866	213.723	14.0553	10	7302
160	280.876	213.202	13.9901	10	7351
161	280.82	212.809	14.0013	10	7399
162	280.703	212.545	14.0566	10	7448
163	280.552	213.162	14.188	10	7497
164	280.792	212.816	14.1516	10	7544
165	280.111	212.338	14.2692	10	7614
166	279.796	211.7	14.2416	10	7641
167	279.568	211.693	14.3322	10	7712
168	279.245	211.068	14.4718	10	7763
169	279.17	210.929	14.5107	10	7814
170	279.636	211.53	14.4222	10	7864
171	279.964	212.237	14.4098	10	7912
172	278.811	210.674	14.5542	10	7961
173	278.998	211.198	14.5832	10	8009
174	279.136	210.993	14.653	10	8058
175	279.479	211.057	14.6707	10	8106
176	279.462	211.113	14.6715	10	8155
177	279.909	211.338	14.4062	10	8203
178	280.134	211.982	14.5051	10	8252
179	280.484	213.139	14.4847	10	8301
180	281.135	214.165	14.437	10	8351
181	281.202	214.444	14.5679	10	8400
182	281.357	213.865	14.7314	10	8449
183	281.409	213.949	14.8561	10	8496
184	281.598	214.112	15.0468	10	8545
185	281.411	214.658	14.9737	10	8593
186	281.171	214.639	14.8431	10	8642
1	401.853	218.399	7.10963	11	10
2	401.971	218.314	7.213	11	49
3	401.957	218.306	7.19966	11	88
4	402.063	218.57	7.1628	11	127
5	402.607	218.917	7.42123	11	166
6	403.238	218.752	7.55752	11	204
7	403.23	218.965	7.03999	11	245
8	403.728	219.017	7.47557	11	285
9	403.169	219.313	7.49874	11	325
10	403.577	219.421	7.82314	11	366
11	403.768	219.676	7.69525	11	408
12	404.132	219.797	7.89562	11	449
13	404.609	219.668	7.70351	11	492
14	404.388	219.802	7.34231	11	534
15	404.378	220.216	7.92662	11	576
16	405.092	219.963	7.66949	11	618
17	404.35	220.37	8.11558	11	660
18	403.978	220.526	7.90918	11	703
19	404.667	220.123	7.50958	11	745
20	404.414	219.743	7.30466	11	788
21	404.48	219.854	7.31792	11	832
22	403.988	220.095	7.12118	11	876
23	403.52	219.922	7.07597	11	919
24	403.754	219.874	7.25722	11	963
25	403.915	219.928	7.63702	11	1007
26	403.467	219.708	7.46353	11	1051
27	403.8	219.806	7.6521	11	1095
28	403.955	219.625	7.41781	11	1138
29	404.296	219.547	7.8567	11	1182
30	404.313	219.497	8.54366	11	1225
31	404.108	219.475	8.42821	11	1268
32	403.183	220.033	9.26414	11	1312
33	403.283	219.446	9.11238	11	1354
34	403.742	219.344	8.14861	11	1398
35	403.787	219.209	8.15244	11	1442
36	403.725	218.971	7.71904	11	1486
37	403.731	219.061	8.45641	11	1529
38	403.894	218.926	8.29806	11	1574
39	404.071	218.689	8.36932	11	1618
40	404.175	218.653	8.03758	11	1663
41	403.546	218.766	8.31586	11	1708
[truncated: 8,905 more rows]
