# Supplementary material for: Functional visualization of NK cell-mediated killing of metastatic single tumor cells
Source: eLife journal article supplement (doi:10.7554/elife.76269), 2022-02-03
Supplement: supp [file tumor_4.xlsx]

## Sheet: Sheet1
1	251.468	69.4617	5.5	1	0
2	252.625	68.4277	5.5	1	26
3	253.988	68.2185	5.5	1	54
4	254.107	68.4012	5.5	1	81
5	254.002	68.4565	5.5	1	109
6	253.279	68.4844	5.5	1	135
7	253.801	66.4496	5.5	1	163
8	254.821	67.5305	5.5	1	193
9	254.953	67.8072	5.5	1	222
10	254.665	67.8334	5.5	1	251
11	254.319	67.4213	5.5	1	280
12	252.63	66.2751	5.5	1	306
13	253.513	65.6168	5.5	1	335
14	253.451	66.0026	5.5	1	364
15	253.595	66.2466	5.5	1	395
16	253.675	66.5079	5.5	1	425
17	253.457	65.68	5.5	1	456
18	252.967	65.7838	5.5	1	487
19	252.973	66.2893	7.38659	1	521
20	253.298	65.7481	5.5	1	549
21	253.192	65.8084	7.14109	1	584
22	253.47	64.3785	7.4245	1	617
23	253.56	64.2078	7.32425	1	648
24	253.409	62.2015	7.79466	1	681
25	253.126	62.3004	7.64384	1	714
26	253.77	62.082	8.71731	1	746
27	255.149	64.9798	9.04297	1	778
28	257.344	66.7161	9.66693	1	812
29	258.4	65.4649	10.4677	1	846
30	256.062	67.8632	9.3343	1	880
31	258.361	67.3755	9.9253	1	913
32	260.316	65.4221	10.6405	1	946
33	259.447	67.8273	10.6779	1	979
34	259.038	67.4837	10.69	1	1014
35	265.904	60.8269	13.9162	1	1047
36	266.175	59.1455	14.1532	1	1079
37	266.233	58.4021	13.8119	1	1111
38	266.817	57.5674	13.7924	1	1144
39	266.993	57.7646	14.2338	1	1176
40	267.094	57.7696	14.5101	1	1216
41	266.6	57.1263	14.582	1	1250
42	266.393	57.0079	14.3045	1	1282
43	266.695	56.624	14.232	1	1308
44	266.664	55.4668	14.0949	1	1342
45	266.739	56.317	14.0767	1	1375
46	266.665	56.3895	13.9576	1	1409
47	266.853	56.6788	14.084	1	1443
48	266.393	57.1472	14.1958	1	1477
49	266.167	52.9596	14.6583	1	1517
50	266.214	54.3903	14.4983	1	1547
51	266.767	55.4526	14.459	1	1578
52	269.189	58.3513	14.5108	1	1609
53	268.696	58.6034	14.5411	1	1641
54	268.782	59.6556	14.1012	1	1666
55	270.448	53.3491	15.1014	1	1703
56	268.602	55.6964	14.906	1	1733
57	268.874	58.4175	14.6955	1	1764
58	273.906	54.5477	15.5668	1	1795
59	273.552	47.1496	16.1913	1	1826
60	273.733	45.9543	16.3741	1	1858
61	273.121	46.9616	15.9626	1	1890
1	154.814	91.3211	5.5	2	1
2	156.723	88.2941	5.5	2	27
4	156.219	87.3611	5.5	2	79
5	162.165	86.351	5.5	2	107
6	165.575	86.2084	5.5	2	136
7	167.243	86.0258	5.5	2	164
8	162.893	85.7696	5.5	2	190
9	156.4	86.4154	5.5	2	219
10	158.426	85.8447	5.5	2	248
11	157.571	85.2842	5.5	2	277
12	165.731	85.2574	5.5	2	307
13	169.614	85.601	5.5	2	336
14	170.068	85.5545	5.5	2	365
15	171.132	85.6519	5.5	2	396
16	173.634	85.6893	5.5	2	426
17	174.26	85.5248	5.5	2	457
18	173.971	85.4964	5.5	2	488
19	173.825	85.6152	5.5	2	518
20	172.661	85.8177	5.5	2	550
21	175.185	85.6854	5.5	2	581
22	175.851	85.7825	5.5	2	614
23	175.941	85.3086	5.5	2	645
24	176.096	85.697	5.5	2	678
25	178.34	85.2627	5.5	2	711
26	178.572	85.2317	5.5	2	743
28	179.952	85.0973	5.5	2	809
29	181.549	84.3668	5.5	2	843
30	187.521	82.675	5.5	2	877
31	190.501	85.9231	5.5	2	910
32	188.368	82.3258	5.5	2	943
33	189.177	81.995	5.5	2	977
34	188.307	82.1805	5.5	2	1011
35	189.525	81.9425	5.5	2	1044
36	188.733	82.1592	5.5	2	1076
37	188.91	82.1922	5.5	2	1108
38	189.261	81.914	5.5	2	1141
39	190.323	81.2067	5.5	2	1174
40	189.865	80.8916	5.5	2	1207
41	189.882	81.1265	5.5	2	1240
42	190.032	81.1495	5.5	2	1272
43	190.268	81.494	5.5	2	1305
44	190.719	81.1839	5.5	2	1339
45	190.647	81.3274	5.5	2	1373
46	190.786	81.2674	5.5	2	1407
47	190.27	81.4014	5.5	2	1441
48	190.263	81.5683	5.5	2	1474
49	189.729	81.4742	5.5	2	1506
50	190.846	81.9827	5.5	2	1538
51	190.897	81.1908	5.5	2	1569
52	190.558	80.6215	5.5	2	1601
53	190.601	80.905	5.5	2	1633
54	190.75	81.6544	5.5	2	1664
55	191.078	80.8669	5.5	2	1696
56	191.022	80.1904	5.5	2	1727
57	191.612	79.7385	5.5	2	1758
58	191.24	79.6834	5.5	2	1788
59	191.481	79.7789	5.5	2	1819
60	191.418	80.724	5.5	2	1851
61	191.793	81.1004	5.5	2	1883
62	192.497	82.4895	6.84537	2	1915
63	192.453	81.0049	5.5	2	1946
64	192.882	81.7476	6.78709	2	1978
65	193.196	81.2187	5.5	2	2011
66	193.587	81.8282	6.90574	2	2043
67	193.88	82.1637	6.9632	2	2074
68	194.002	81.6474	7.21406	2	2104
69	194.294	81.0648	6.94084	2	2135
70	194.866	81.138	7.20076	2	2166
71	194.897	81.4725	7.43807	2	2197
72	194.358	81.5632	7.02314	2	2228
73	194.474	81.9582	7.07907	2	2260
74	194.779	79.1248	5.5	2	2290
75	194.998	83.34	7.53952	2	2322
76	194.696	83.7375	7.68293	2	2353
77	194.742	83.189	7.72122	2	2384
78	194.624	83.5261	8.0559	2	2415
79	193.941	83.8851	7.91787	2	2446
80	193.826	83.1539	8.24814	2	2477
81	193.849	83.6759	8.30335	2	2506
82	193.073	78.1535	7.92814	2	2535
83	192.709	77.1453	7.63829	2	2565
84	192.479	77.3356	8.09678	2	2596
85	192.177	77.6234	7.65159	2	2626
86	191.712	77.6153	7.76292	2	2657
87	191.637	77.3082	7.65039	2	2687
88	191.492	77.3933	8.00369	2	2717
89	191.662	77.7261	8.11796	2	2747
90	191.573	77.9218	8.44073	2	2778
91	191.735	77.5856	8.55567	2	2807
92	191.485	77.4497	8.5575	2	2836
93	191.851	77.2669	8.65915	2	2866
94	191.569	77.2853	8.78055	2	2896
95	191.575	77.2574	8.73688	2	2926
96	191.709	77.1791	8.87389	2	2956
97	191.359	77.5244	9.15214	2	2987
98	190.823	78.1196	9.1992	2	3018
99	191.714	77.8927	8.89953	2	3050
100	191.178	78.3624	9.4415	2	3082
101	190.643	79.5668	9.57012	2	3113
102	190.288	80.3995	9.57097	2	3145
103	190.584	80.3241	9.69849	2	3176
104	190.436	80.8167	9.47492	2	3209
105	190.856	80.2904	9.46746	2	3241
106	191.626	79.5341	9.43333	2	3272
107	192.814	78.339	9.49968	2	3303
108	192.771	78.6878	9.67023	2	3335
109	192.447	79.0563	9.5846	2	3365
110	192.679	78.4547	8.84525	2	3396
111	192.851	78.5882	9.58175	2	3426
112	192.413	78.5227	9.37396	2	3457
113	191.726	79.0912	9.27104	2	3488
114	192.109	78.7802	9.26408	2	3517
115	192.124	78.792	9.44326	2	3547
116	192.301	78.8417	9.54882	2	3577
117	192.827	78.0132	9.47104	2	3606
118	192.743	77.9822	9.47783	2	3636
119	192.953	77.9869	9.59317	2	3663
120	192.325	78.4515	9.57998	2	3693
121	192.179	78.302	9.46904	2	3723
122	191.981	78.406	9.52342	2	3752
123	191.931	78.2713	9.59917	2	3782
124	191.673	78.3913	9.51447	2	3812
125	191.539	78.1222	9.32017	2	3842
126	191.781	77.9245	9.28339	2	3872
127	192.03	77.5721	9.58302	2	3901
128	192.042	77.4454	9.78658	2	3931
129	191.923	77.6648	9.64131	2	3961
130	191.594	77.5213	9.57955	2	3991
131	191.689	77.1102	9.61388	2	4020
132	191.591	77.0956	9.86217	2	4049
133	191.644	77.3494	9.95339	2	4078
134	192.659	75.9882	9.94177	2	4107
135	192.133	76.8296	10.1274	2	4136
136	192.153	77.0336	10.256	2	4163
137	191.956	77.1604	10.3671	2	4190
138	191.903	77.2322	10.3985	2	4215
1	189.971	92.1981	5.5	3	2
2	189.521	91.7779	5.5	3	28
3	189.822	90.784	5.5	3	53
4	190.821	90.2579	5.5	3	80
5	190.461	90.4559	5.5	3	108
6	191.507	90.3393	5.5	3	137
7	191.566	90.1956	5.5	3	165
8	192.118	89.9352	5.5	3	191
9	193.581	89.2451	5.5	3	220
10	193.553	88.9976	5.5	3	249
11	193.579	88.9395	5.5	3	278
12	192.68	89.7467	5.5	3	308
13	193.875	88.9387	5.5	3	337
14	193.803	88.697	5.5	3	366
15	193.916	88.7753	5.5	3	397
16	193.34	88.7335	5.5	3	427
17	192.793	88.9872	5.5	3	458
18	192.322	89.2218	5.5	3	489
19	192.722	89.4213	5.5	3	519
20	193.717	88.8521	5.5	3	551
21	194.884	88.0286	5.5	3	582
22	195.193	88.2416	5.5	3	615
23	195.327	88.4048	5.5	3	646
24	193.71	89.9373	5.5	3	679
25	193.557	89.697	5.5	3	712
26	193.589	90.4704	5.5	3	744
27	187.264	87.2388	5.5	3	776
28	194.25	89.5558	5.5	3	810
29	194.123	89.5987	5.5	3	844
1	255.878	132.5	12.0012	4	3
2	255.765	132.139	12.1662	4	29
3	256.128	131.326	11.9094	4	56
4	255.969	131.531	12.1001	4	82
5	255.736	131.33	12.2763	4	111
6	255.468	131.244	12.3736	4	139
7	255.225	130.746	11.8746	4	168
8	255.782	131.161	12.1029	4	195
9	255.562	130.949	12.1671	4	224
10	255.712	130.814	12.5205	4	253
11	255.221	130.375	12.1194	4	281
12	254.384	130.252	12.2936	4	310
13	254.762	130.511	12.633	4	339
14	254.319	130.202	12.5043	4	369
15	253.669	133.175	13.0066	4	400
16	255.308	130.97	12.6325	4	430
17	256.068	131.454	13.2134	4	461
18	255.773	130.915	12.9724	4	492
19	255.745	130.55	12.8222	4	523
20	255.26	130.288	12.6577	4	553
21	255.409	130.018	13.0106	4	585
22	255.919	130.454	13.0189	4	618
23	256.257	130.717	12.9408	4	649
24	256.436	130.691	13.1102	4	682
25	256.551	130.655	13.1214	4	715
26	256.705	130.2	13.4351	4	747
27	256.681	130.024	13.5578	4	779
28	256.839	130.752	13.6506	4	813
29	257.456	130.944	13.8763	4	847
30	257.575	131.14	13.8219	4	881
31	257.805	131.347	13.6387	4	914
32	257.707	132.11	13.8206	4	947
33	257.539	131.269	13.9785	4	980
34	257.319	131.005	14.2766	4	1023
35	257.296	131.155	13.5873	4	1048
36	256.872	131.115	13.6639	4	1080
37	256.855	130.778	13.6376	4	1112
38	256.825	130.391	13.1813	4	1145
39	256.845	130.761	13.7397	4	1177
40	256.726	130.615	14.0172	4	1209
41	256.517	130.459	14.038	4	1242
42	256.43	130.248	13.8851	4	1275
43	256.634	130.283	14.2041	4	1309
44	256.703	130.838	13.8658	4	1343
45	256.564	130.347	14.0644	4	1376
46	256.486	130.366	14.0361	4	1410
47	256.139	129.901	14.2047	4	1444
48	255.926	130.307	14.1722	4	1478
49	255.623	129.977	14.1836	4	1508
50	255.816	129.832	14.0201	4	1541
51	255.889	129.253	14.115	4	1572
52	255.951	129.881	14.1234	4	1604
53	255.297	129.601	14.1099	4	1635
54	255.096	129.819	13.9319	4	1667
55	255.616	130.338	14.2037	4	1698
56	260.007	128.329	9.97705	4	1729
57	260.006	128.127	10.0173	4	1760
58	255.632	130.503	14.4009	4	1796
59	255.726	130.683	14.5722	4	1828
60	255.668	130.697	14.5942	4	1860
61	255.269	130.725	14.6691	4	1892
62	255.502	132.526	14.7788	4	1923
63	256.285	131.614	14.8132	4	1954
64	256.45	132.036	14.9024	4	1986
65	256.352	131.436	15.068	4	2019
66	256.201	131.762	14.8316	4	2049
67	256.037	132.734	14.8288	4	2080
68	256.063	132.357	14.73	4	2110
69	256.357	132.317	14.7445	4	2141
70	256.682	132.109	14.9206	4	2172
72	265.793	127.459	5.5	4	2230
73	266.362	126.976	5.5	4	2262
74	266.362	127.095	5.5	4	2292
75	266.211	126.873	5.5	4	2324
76	265.925	126.898	5.5	4	2355
77	265.92	126.51	5.5	4	2386
78	265.293	126.918	5.5	4	2417
79	265.958	126.496	5.5	4	2448
1	418.424	206.162	12.7547	5	4
2	419.304	206.301	12.1384	5	30
3	419.487	207.658	11.5715	5	55
4	419.161	207.581	11.7827	5	83
5	419.639	208.309	11.5527	5	110
6	419.87	208.883	11.414	5	138
7	419.689	207.795	11.7334	5	167
8	419.226	208.284	10.7515	5	194
9	419.283	208.976	10.9623	5	223
10	419.039	208.216	11.5566	5	252
11	418.948	206.658	12.1665	5	282
12	418.46	206.01	12.7405	5	311
14	418.69	205.475	12.6827	5	370
15	419.017	206.291	12.695	5	401
16	418.655	205.966	12.9409	5	431
17	418.451	205.924	12.9912	5	462
18	418.411	206.539	12.7893	5	493
19	418.467	205.87	13.139	5	524
20	418.404	206.006	13.4237	5	555
21	412.725	204.919	15.7486	5	587
22	418.749	207.034	13.0057	5	619
23	418.862	206.523	13.5194	5	651
24	418.643	206.9	14.1195	5	683
25	417.529	205.534	14.9932	5	722
26	414.394	205.176	16.4932	5	754
27	414.239	204.854	16.5402	5	786
28	414.446	205.434	16.09	5	814
29	414.909	205.119	15.9765	5	848
30	415.361	205.501	15.871	5	882
31	415.596	206.41	15.5086	5	915
32	415.859	206.628	15.6728	5	948
33	414.804	206.528	16.0209	5	981
34	414.892	206.359	16.3203	5	1015
35	414.455	206.39	16.1569	5	1049
36	419.834	208.353	13.4109	5	1081
37	419.407	207.853	13.6384	5	1113
38	418.249	206.682	14.3238	5	1153
39	416.433	206.645	15.5061	5	1184
40	413.378	205.671	16.8505	5	1217
41	419.239	207.361	14.1284	5	1243
42	418.889	207.683	14.0942	5	1276
43	418.429	206.794	14.581	5	1316
44	418.169	206.749	14.6732	5	1350
45	417.095	205.916	15.4927	5	1384
46	417.644	206.491	14.8845	5	1418
47	417.564	206.266	15.023	5	1452
48	419.118	208.004	13.9057	5	1479
49	418.883	207.387	14.0578	5	1509
50	418.327	206.746	14.4423	5	1548
51	417.841	206.007	14.8247	5	1579
52	418.438	206.316	14.8721	5	1610
53	417.676	206.103	15.2565	5	1642
54	417.054	206.077	15.4778	5	1673
55	411.945	205.036	17.8846	5	1704
56	412.397	205.115	17.6204	5	1734
57	412.938	205.039	17.5682	5	1766
58	415.68	205.607	16.4378	5	1797
59	413.293	205.458	17.178	5	1829
60	411.519	205.399	18.2108	5	1861
61	406.675	205.256	20.659	5	1895
62	407.3	205.249	20.0506	5	1926
63	407.958	205.445	19.9116	5	1955
64	411.609	205.993	18.6661	5	1987
65	413.123	206.426	17.8065	5	2021
66	411.746	206.393	18.8241	5	2052
67	410.645	206.05	19.1022	5	2082
68	408.437	205.952	20.1726	5	2112
69	411.289	206.001	18.5876	5	2143
70	412.79	206.357	18.1982	5	2173
71	415.581	206.684	17.2043	5	2205
72	411.463	206.017	18.2966	5	2237
73	413.956	206.511	18.223	5	2269
74	412.997	206.578	18.3053	5	2300
75	413.263	206.78	17.7589	5	2330
76	407.407	205.868	20.034	5	2362
77	406.241	206.156	20.7855	5	2393
78	413.867	207.115	17.8509	5	2421
79	414.819	206.438	17.7826	5	2454
80	410.246	205.653	19.7514	5	2485
81	409.094	205.517	19.5914	5	2516
82	406.664	204.97	20.8706	5	2546
83	412.152	205.705	18.8112	5	2575
84	412.853	206.038	18.3338	5	2603
85	407.51	204.829	20.4187	5	2638
86	411.488	205.549	18.7163	5	2665
87	406.821	204.394	20.4276	5	2698
88	406.623	203.956	20.3722	5	2727
89	405.986	203.452	20.802	5	2758
1	248.44	354.764	5.5	6	5
2	248.83	354.43	5.5	6	31
3	248.411	354.712	5.5	6	57
4	248.436	357.021	5.5	6	84
5	249.038	358.213	5.5	6	112
6	248.819	356.657	5.5	6	140
7	249.542	355.435	5.5	6	169
8	248.636	356.24	5.5	6	196
9	248.595	353.516	5.5	6	225
10	248.822	355.7	5.5	6	254
11	248.579	355.459	5.5	6	283
12	249.531	358.251	5.5	6	312
13	250.613	358.587	5.5	6	340
14	249.293	355.355	5.5	6	371
15	248.647	357.03	5.5	6	402
16	249.431	359.12	5.5	6	432
17	248.355	362.426	5.5	6	463
18	247.105	356.88	5.5	6	494
19	247.764	355.018	5.5	6	525
20	248.576	363.218	5.5	6	556
21	249.538	364.667	5.5	6	588
22	249.439	368.601	5.5	6	620
23	248.507	370.648	7.71227	6	653
24	247.525	371.824	8.63467	6	686
25	246.442	369.074	9.18742	6	717
26	249.259	376.011	8.99724	6	750
27	249.702	376.251	9.24964	6	782
28	249.982	376.273	9.23865	6	817
29	250.174	377.72	9.486	6	851
30	249.75	378.081	9.71525	6	884
31	249.673	378.345	9.71357	6	917
32	249.466	377.969	9.70128	6	950
33	250.352	383.556	9.8273	6	983
34	249.607	384.525	9.63059	6	1017
35	251.981	380.444	9.79458	6	1050
36	251.964	378.77	9.31095	6	1082
37	251.578	379.172	9.45571	6	1114
38	249.646	382.03	9.69617	6	1146
39	247.917	385.82	9.43197	6	1178
40	248.709	388.033	9.34827	6	1210
41	251.393	393.69	6.85071	6	1244
42	254.237	396.797	5.5	6	1278
43	257.579	399.498	5.5	6	1312
44	259.157	400.44	5.5	6	1346
45	259.695	400.783	5.5	6	1379
46	261.571	402.443	7.61505	6	1413
47	262.465	402.855	7.91579	6	1448
48	264.102	403.24	8.09937	6	1483
49	266.974	404.893	8.61638	6	1513
50	267.333	405.531	9.01304	6	1544
51	270.136	409.517	9.99328	6	1576
52	273.738	414.448	10.6146	6	1607
53	273.466	415.203	10.5222	6	1638
54	273.417	416.051	10.1862	6	1670
1	72.7459	374.703	5.5	7	6
2	73.1232	374.92	5.5	7	32
3	72.8219	374.548	5.5	7	58
4	71.8287	374.116	5.5	7	85
5	68.9214	371.896	5.5	7	113
6	68.9062	371.904	5.5	7	141
7	69.4246	372.451	5.5	7	170
8	69.1379	372.1	5.5	7	197
9	68.9848	371.648	5.5	7	226
10	68.6101	371.384	5.5	7	255
11	68.5599	371.52	5.5	7	284
12	68.7887	371.517	5.5	7	313
13	69.2889	371.911	5.5	7	341
14	72.53	374.46	5.5	7	372
15	72.8919	375.141	8.37994	7	404
16	70.695	372.89	5.5	7	433
17	70.4003	372.88	5.5	7	464
18	72.8527	375.572	8.71561	7	496
19	70.6773	372.827	5.5	7	526
20	71.7326	373.753	7.29322	7	558
21	71.92	374.014	7.90715	7	590
22	72.4736	374.359	7.81629	7	622
23	71.5743	373.746	6.81653	7	654
24	70.3083	373.278	5.5	7	684
25	72.293	374.587	7.77081	7	718
26	70.3103	373.003	5.5	7	748
27	69.993	373.565	5.5	7	780
28	73.6865	376.024	9.19629	7	816
29	70.7729	373.515	5.5	7	849
1	249.176	495.626	5.5	8	7
2	253.584	485.729	5.5	8	33
3	255.193	485.571	5.5	8	60
4	251.88	489.164	5.5	8	86
5	256.598	485.74	5.5	8	116
6	251.605	490.42	5.5	8	142
7	255.704	484.173	5.5	8	173
8	255.082	483.677	5.5	8	200
9	250.38	490.269	5.5	8	227
10	252.273	489.816	5.5	8	256
11	253.03	489.769	5.5	8	285
12	255.808	485.256	5.5	8	316
13	256.115	484.321	5.5	8	344
14	255.076	483.977	5.5	8	375
15	255.275	484.501	5.5	8	406
16	254.945	485.29	5.5	8	436
17	255.28	484.098	5.5	8	467
18	256.003	484.167	5.5	8	498
19	255.877	483.659	5.5	8	529
20	256.121	483.669	5.5	8	560
21	256.035	483.75	5.5	8	592
22	256.13	483.539	5.5	8	624
23	256.663	484.477	5.5	8	656
24	257.995	484.734	6.8331	8	688
25	256.418	485.007	5.5	8	719
26	257.354	484.9	5.5	8	751
27	257.381	484.785	5.5	8	783
28	259.417	485.739	7.30159	8	818
29	257.685	484.54	5.5	8	852
30	258.147	484.773	6.89108	8	885
31	259.061	484.969	7.36097	8	918
32	259.383	484.313	7.18116	8	952
33	259.362	485.215	7.07946	8	985
34	258.069	484.539	5.5	8	1019
35	258.098	483.309	5.5	8	1052
36	258.041	482.886	5.5	8	1084
37	257.955	483.66	5.5	8	1117
38	259.118	483.843	7.26986	8	1149
39	261.461	481.261	5.5	8	1180
40	259.551	483.74	7.19137	8	1212
41	257.75	483.928	5.5	8	1246
42	256.711	483.803	5.5	8	1279
43	258.167	483.949	7.2168	8	1313
44	258.043	483.296	7.27482	8	1347
45	257.516	483.476	7.18993	8	1380
46	257.273	483.451	6.98541	8	1414
47	256.208	483.87	5.5	8	1447
48	256.346	483.275	5.5	8	1482
49	256.609	483.626	5.5	8	1512
51	257.982	482.938	7.87785	8	1575
52	258.207	483.742	7.97857	8	1606
53	258.334	483.288	8.36643	8	1637
54	257.696	483.391	7.53798	8	1669
55	256.566	482.744	5.5	8	1700
56	257.365	482.751	7.67764	8	1730
1	119.819	490.126	13.2928	9	8
2	119.392	490.692	12.9925	9	34
3	119.385	490.651	12.9525	9	59
4	119.989	491.484	12.9848	9	88
5	119.795	491.583	13.1628	9	115
6	119.182	491.162	13.3296	9	144
7	119.891	491.564	13.1019	9	172
8	119.136	490.719	13.2727	9	199
9	119.898	491.14	13.181	9	229
10	119.563	490.348	13.279	9	258
11	119.836	490.959	13.4492	9	287
12	119.037	490.239	13.7516	9	315
13	119.916	491.494	13.946	9	343
14	118.774	490.474	13.639	9	374
15	119.831	491.578	13.7653	9	405
16	118.865	490.406	13.46	9	435
17	119.205	490.314	13.3836	9	466
18	118.821	491.114	13.2354	9	497
19	119.017	490.024	13.4655	9	528
20	119.31	491.18	13.8207	9	559
21	119.23	490.635	13.7632	9	591
22	119.564	491.179	13.8789	9	623
23	118.848	491.356	14.0397	9	655
24	117.809	491.73	14.04	9	687
25	118.366	491.915	14.6583	9	726
26	119.426	491.482	14.5499	9	759
27	120.276	492.494	14.5625	9	791
28	120.014	491.778	14.6624	9	826
29	120.825	492.031	14.5899	9	859
30	121.296	492.359	14.7387	9	892
31	119.243	492.034	14.599	9	925
32	120.032	493.077	14.5205	9	959
33	120.357	492.557	14.6752	9	993
34	121.57	492.942	14.6217	9	1027
35	121.176	491.97	14.5658	9	1059
36	120.636	492.622	14.3619	9	1092
37	120.127	492.356	14.1702	9	1116
38	119.602	491.998	14.183	9	1148
39	120.422	492.928	14.4602	9	1189
40	120.663	491.538	14.4416	9	1222
41	121.133	492.454	14.4681	9	1255
42	121.243	490.994	14.9062	9	1287
43	121.253	491.655	14.7816	9	1321
44	121.37	491.321	15.0678	9	1355
45	120.719	492.626	15.0214	9	1389
46	120.056	491.551	14.8915	9	1423
47	120.743	490.808	14.9576	9	1456
48	121.111	492.505	14.997	9	1489
49	120.853	490.836	15.2141	9	1521
50	120.991	490.89	15.2007	9	1552
51	120.01	491.245	15.052	9	1583
52	120.408	491.143	15.2444	9	1615
53	119.243	490.799	15.0678	9	1647
54	119.592	491.56	15.2767	9	1678
55	120.577	490.876	14.9628	9	1709
56	120.455	490.519	15.2533	9	1740
57	121.016	490.108	15.3276	9	1771
58	120.541	490.057	15.6032	9	1803
59	120.683	490.85	15.6161	9	1835
60	120.621	491.107	15.4494	9	1867
61	121.246	490.976	16.2447	9	1899
62	121.579	492.164	15.6243	9	1930
63	121.689	491.969	16.0781	9	1961
64	121.858	491.079	16.5893	9	1993
65	121.592	492.21	16.0044	9	2026
66	121.674	492.101	16.592	9	2057
67	121.743	491.608	17.0983	9	2087
68	122.134	492.043	16.5231	9	2117
69	122.546	491.806	16.4733	9	2148
70	122.589	491.712	16.6375	9	2179
71	121.75	491.891	16.661	9	2210
72	122.234	492.382	16.2069	9	2242
73	122.093	492.218	16.6401	9	2273
74	122.095	492.355	16.996	9	2303
75	122.215	492.373	16.4328	9	2336
76	122.63	492.853	15.8621	9	2367
77	122.43	491.948	16.3622	9	2398
78	122.348	491.664	16.327	9	2428
79	121.983	491.653	16.3242	9	2459
80	121.79	491.578	16.0747	9	2489
81	121.926	491.732	16.2313	9	2519
82	122.263	491.329	16.1373	9	2549
83	122.018	491.144	16.5014	9	2578
84	122.216	491.063	16.1826	9	2608
85	121.191	492.174	15.4887	9	2639
86	120.95	491.664	15.6755	9	2669
87	120.937	491.213	16.3015	9	2699
88	121.126	491.324	16.5294	9	2729
89	121.805	491.597	16.1462	9	2760
90	121.577	491.034	16.6541	9	2789
91	121.549	490.895	16.6922	9	2818
92	121.444	490.704	17.1049	9	2848
93	121.157	490.951	17.155	9	2878
94	121.328	491.437	16.7498	9	2908
95	121.335	490.975	17.4472	9	2938
96	121.737	490.504	17.1845	9	2968
97	121.949	490.36	17.0316	9	2999
98	121.979	490.395	17.4206	9	3030
99	121.998	491.519	17.9598	9	3062
100	121.919	491.111	17.661	9	3095
101	122.079	491.253	17.5673	9	3126
102	122.611	491.468	17.5029	9	3158
103	122.893	491.833	17.547	9	3188
104	122.671	491.956	17.2994	9	3222
105	122.538	492.418	17.5511	9	3254
106	121.984	492.783	18.2058	9	3285
107	122.499	492.982	18.8396	9	3315
108	122.52	492.737	18.5601	9	3348
109	122.472	492.728	18.585	9	3378
110	122.331	492.644	18.7054	9	3408
111	122.699	492.667	18.7785	9	3438
112	122.178	492.284	19.2888	9	3470
113	122.111	492.151	19.4613	9	3499
114	121.665	492.188	19.8675	9	3529
115	121.804	491.929	19.8136	9	3559
116	121.939	492.059	19.8584	9	3588
117	122.314	491.706	19.19	9	3618
118	122.565	492.245	18.8291	9	3646
119	122.345	491.97	19.8035	9	3674
120	122.121	491.918	19.6907	9	3704
121	121.541	491.942	19.2266	9	3734
122	121.909	491.877	19.1193	9	3763
123	121.693	491.936	18.9623	9	3794
124	121.733	491.607	18.6507	9	3824
125	121.754	491.164	19.0354	9	3854
126	121.564	491.043	19.885	9	3884
127	121.503	491.064	19.2143	9	3912
128	121.442	491.114	19.5291	9	3943
129	121.638	490.933	19.2116	9	3973
130	121.759	490.892	18.8537	9	4002
131	121.564	491.033	19.024	9	4031
132	120.805	491.317	19.6629	9	4059
133	121.076	490.875	20.0134	9	4088
134	121.033	491.023	21.1043	9	4117
135	120.853	491.104	21.0483	9	4146
136	121.038	491.188	20.5969	9	4174
137	120.967	491.52	21.1905	9	4201
138	121.282	491.953	21.1758	9	4225
1	226.465	144.001	19.0027	10	9
2	227.828	144.971	19.3172	10	35
3	227.634	144.754	19.4638	10	61
4	227.35	144.875	19.384	10	89
5	227	145.074	19.9111	10	117
6	227.027	145.047	19.7983	10	145
7	227.402	145.316	19.7826	10	174
8	226.535	144.166	19.6824	10	201
9	226.893	144.034	19.6379	10	230
10	226.67	143.552	19.4896	10	259
11	225.655	143.505	19.5236	10	288
12	226.146	143.705	19.94	10	317
13	227.016	144.451	20.0224	10	345
14	226.733	145.229	20.433	10	376
15	227.231	145.05	20.0118	10	407
16	226.641	144.047	20.1292	10	437
17	226.473	144.124	19.6875	10	468
18	226.81	144.217	19.8616	10	499
19	226.354	144.025	19.7159	10	530
20	226.631	144.316	19.7595	10	562
21	226.332	144.244	20.3686	10	594
22	225.916	144.167	20.2275	10	626
23	226.071	143.771	20.4235	10	658
24	226.33	144.203	20.4146	10	690
25	226.416	144.529	20.6982	10	721
26	226.266	144.641	21.3025	10	753
27	226.386	144.785	20.869	10	785
28	227.141	144.813	20.9705	10	820
29	227.616	145.21	21.326	10	854
30	227.889	145.274	21.1332	10	887
31	227.855	145.278	21.5056	10	920
32	228.143	145.983	20.8493	10	954
33	227.973	145.698	20.6737	10	988
34	228.231	145.565	20.8878	10	1021
35	227.678	145.259	20.9332	10	1054
36	227.222	144.93	20.648	10	1086
37	226.266	144.562	20.4992	10	1119
38	226.729	144.849	20.2844	10	1151
39	226.337	144.996	20.8473	10	1183
40	226.364	144.657	21.0703	10	1215
41	226.46	144.643	21.0572	10	1249
42	226.44	144.521	20.8747	10	1281
43	226.794	144.321	21.2236	10	1315
44	226.292	144.229	20.8318	10	1349
45	226.231	144.091	21.0388	10	1383
46	225.552	143.61	20.7	10	1417
47	225.763	143.775	21.6592	10	1451
48	224.552	142.878	21.3009	10	1485
49	225.897	143.421	21.4131	10	1516
50	225.44	143.036	21.9226	10	1546
51	219.336	128.904	25.5	10	1588
52	225.955	126.507	25.5	10	1619
53	232.543	116.988	25.5	10	1652
54	232.967	115.054	25.5	10	1683
55	234.361	116.526	25.5	10	1714
56	234.463	115.311	25.5	10	1745
57	234.628	107.686	22.9679	10	1763
58	236.347	103.759	21.6249	10	1794
59	237.015	102.137	21.1284	10	1825
60	238.088	99.8811	20.1824	10	1857
61	240.701	93.5974	17.4435	10	1888
62	239.943	93.2402	17.1255	10	1920
63	237.827	92.4512	17.2174	10	1951
64	237.582	93.0648	17.1596	10	1983
65	243.776	91.9185	18.412	10	2016
66	245.518	89.2628	20.1091	10	2048
67	245.887	72.6025	25.5	10	2090
68	245.866	70.5893	25.5	10	2121
69	244.533	63.2898	25.5	10	2152
70	243.491	63.4331	25.5	10	2183
71	243.87	62.6447	25.5	10	2214
72	244.698	61.8182	25.5	10	2246
73	245.389	62.0867	25.5	10	2277
74	247.542	58.7971	25.5	10	2307
1	395	172.039	16.369	11	10
2	394.444	171.838	16.4489	11	36
3	394.649	172.717	15.9066	11	62
4	394.33	173.064	16.0576	11	90
5	393.607	173.26	16.3451	11	118
6	394.129	173.152	16.2201	11	146
7	393.664	172.879	16.3677	11	176
8	392.485	170.942	18.4067	11	204
9	393.061	169.593	18.301	11	233
10	393.072	170.193	18.1982	11	262
11	392.709	170.414	18.4642	11	291
12	391.991	171.52	18.234	11	320
13	391.681	172.166	18.1208	11	348
14	390.855	172.346	18.2237	11	379
15	391.427	171.756	18.4934	11	410
16	392.039	169.457	18.8559	11	440
17	392.406	169.524	18.8885	11	471
18	392.372	170.47	18.8007	11	502
19	392.506	169.534	18.7339	11	533
20	392.23	170.01	18.9055	11	564
21	392.295	169.697	19.0507	11	596
22	392.434	169.121	19.5432	11	629
23	392.886	169.265	19.7441	11	661
24	393.35	169.56	19.8775	11	694
25	393.213	171.215	19.4149	11	725
26	393.505	170.733	19.8113	11	758
27	393.726	170.722	19.7441	11	790
28	393.638	170.808	19.9292	11	824
29	393.783	171.109	20.2641	11	858
30	393.95	170.635	20.1761	11	890
31	394.148	169.928	20.4416	11	924
32	394.708	169.609	20.359	11	958
33	394.05	172.806	18.9301	11	990
34	393.524	171.894	19.7529	11	1025
35	394.244	170.896	19.8854	11	1057
36	393.617	170.842	19.6532	11	1090
37	393.6	171.053	19.4026	11	1123
38	394.195	169.783	19.541	11	1156
39	394.31	171.204	19.6332	11	1188
40	395.39	170.219	20.4496	11	1221
41	395.588	168.701	20.403	11	1254
42	395.339	168.762	20.6035	11	1285
43	396.38	168.228	21.5688	11	1318
44	395.789	168.852	20.3111	11	1352
45	395.024	168.474	20.6149	11	1386
46	395.271	168.239	20.5576	11	1421
47	395.191	168.104	20.5997	11	1455
48	394.311	167.885	20.9869	11	1488
49	394.669	167.916	21.1679	11	1519
50	394.351	167.591	21.2457	11	1550
51	394.312	167.317	21.235	11	1581
52	393.914	168.338	21.5358	11	1612
53	393.38	169.197	21.0414	11	1644
54	393.244	169.943	20.513	11	1675
55	393.26	169.173	21.4005	11	1706
56	393.476	170.511	20.866	11	1736
57	393.742	169.656	20.8925	11	1768
58	393.885	168.724	21.3405	11	1799
59	394.207	168.423	21.5181	11	1831
60	394.503	168.519	21.4081	11	1862
61	394.151	169.278	21.1847	11	1893
62	394.274	168.584	21.5575	11	1924
63	395.098	169.219	21.457	11	1956
64	394.78	169.279	21.717	11	1988
65	395.16	169.298	22.0272	11	2023
66	395.835	169.522	22.9081	11	2054
67	395.74	169.665	22.0971	11	2084
68	396.334	169.463	22.2915	11	2114
69	394.626	170.17	21.9007	11	2145
70	395.572	169.867	21.7651	11	2176
71	396.637	169.581	22.3157	11	2207
72	395.901	169.579	21.838	11	2239
73	397.051	170.126	23.1292	11	2271
74	395.382	170.52	22.3797	11	2301
75	394.48	169.775	22.42	11	2334
76	393.665	171.403	22.302	11	2364
77	393.629	171.827	22.405	11	2395
78	394.04	170.849	22.923	11	2425
79	393.837	170.049	22.8676	11	2455
80	394.212	171.19	22.2252	11	2486
81	394.337	170.669	22.2878	11	2517
82	393.719	170.515	21.9183	11	2548
83	392.113	173.927	20.7546	11	2576
84	392.351	173.839	20.9675	11	2606
85	392.723	172.847	20.9321	11	2636
86	392.936	170.525	21.3774	11	2667
87	393.306	171.574	21.5583	11	2696
88	394.001	170.742	22.6989	11	2728
89	392.644	171.47	21.9899	11	2759
90	393.011	169.726	22.7767	11	2788
91	393.892	168.624	23.673	11	2817
92	392.785	169.314	23.9323	11	2846
93	393.198	169.072	23.833	11	2875
94	394.431	168.313	23.9235	11	2905
95	394.277	168.555	23.5005	11	2935
96	394.63	168.184	25.5	11	2981
97	394.344	168.827	25.5	11	3012
98	393.691	171.09	25.5	11	3042
99	392.934	171.745	25.5	11	3074
100	393.749	172.212	24.0837	11	3091
101	393.83	172.72	23.6027	11	3124
102	393.891	173.087	23.8006	11	3155
103	395.267	169.688	25.5	11	3202
104	394.008	171.306	23.9533	11	3219
105	393.347	172.713	22.8327	11	3251
106	393.061	175.868	22.341	11	3282
107	393.354	176.002	22.0923	11	3312
108	393.473	176.354	21.9915	11	3345
109	393.241	175.589	22.0899	11	3375
110	392.599	176.09	22.3445	11	3406
111	392.55	176.063	21.829	11	3436
112	392.97	176.34	21.6961	11	3466
113	393.142	176.028	21.5741	11	3496
114	393.101	175.919	21.6523	11	3525
115	393.163	175.659	22.2746	11	3557
116	392.75	175.318	22.3899	11	3586
117	392.738	175.095	22.7118	11	3616
118	393.082	173.636	23.2809	11	3644
119	393.119	174.374	23.6895	11	3672
120	393.196	175.948	22.9641	11	3702
121	393.062	175.906	22.2471	11	3732
122	393.211	176.233	21.8768	11	3761
123	392.443	176.408	21.833	11	3793
124	391.939	177.021	21.5701	11	3821
125	391.559	176.522	21.348	11	3851
126	391.751	176.496	21.5775	11	3881
127	391.615	176.44	21.3641	11	3910
128	391.737	176.272	21.4326	11	3940
129	391.832	176.426	21.3985	11	3970
130	391.421	175.693	21.5964	11	4000
131	391.375	176.154	21.733	11	4028
132	391.251	175.892	21.9624	11	4056
133	391.25	175.8	21.4662	11	4086
134	391.55	175.787	22.0729	11	4114
135	391.966	174.744	22.3373	11	4142
136	391.297	175.268	22.3758	11	4171
137	391.789	175.334	23.2293	11	4199
138	391.454	175.96	23.1053	11	4223
1	440.529	29.335	17.0774	12	11
2	441.033	28.7109	17.8407	12	37
3	440.883	28.9666	18.0785	12	63
4	440.105	29.1848	17.9097	12	91
5	440.161	29.2648	18.0425	12	119
6	439.194	29.6116	17.3541	12	147
7	439.174	28.8795	16.7497	12	175
8	438.695	29.0616	16.1105	12	202
9	438.449	29.2239	16.2569	12	231
10	437.967	29.0853	16.2503	12	260
11	437.965	29.169	16.1321	12	289
12	438.636	28.9608	16.0205	12	318
13	438.748	28.7966	16.6543	12	346
14	438.755	28.5408	16.5074	12	377
15	439.495	28.8312	16.9066	12	408
16	439.684	28.7138	16.853	12	438
17	439.64	28.8117	17.0552	12	469
18	439.636	28.6426	17.0369	12	500
19	440.061	28.4875	17.6048	12	531
20	441.045	28.414	17.7604	12	563
21	440.863	28.4403	17.776	12	595
22	440.563	28.6232	17.6391	12	627
23	440.67	28.8768	17.7771	12	659
24	439.861	29.357	18.0181	12	692
25	439.887	29.3355	18.0637	12	723
26	441.268	29.4743	18.3413	12	755
27	441.569	29.188	18.423	12	787
28	441.734	29.2441	18.147	12	821
29	441.242	29.6692	18.1659	12	855
30	441.065	29.6946	18.6198	12	888
31	440.941	29.9598	19.0719	12	921
32	440.626	30.5621	18.2462	12	955
33	436.714	29.0592	15.6752	12	989
34	433.534	27.2156	15.8581	12	1022
35	427.933	26.0947	15.3912	12	1055
36	427.028	26.2325	15.3856	12	1087
37	425.684	26.2955	15.3087	12	1120
38	420.722	27.5125	18.6174	12	1154
39	418.338	30.3318	19.9446	12	1186
40	417.75	30.891	20.2913	12	1219
41	417.222	30.336	20.3441	12	1252
42	416.911	30.6672	21.5611	12	1283
43	415.502	31.527	22.3297	12	1320
44	414.368	30.7044	22.8021	12	1354
45	414.146	30.8631	22.8418	12	1388
46	413.711	31.2684	23.0355	12	1422
47	411.702	31.0575	25.5	12	1465
48	410.196	31.3976	25.5	12	1496
49	410.791	31.6405	25.5	12	1527
50	406.913	26.8898	25.5	12	1558
51	408.152	25.7805	25.5	12	1590
52	406.599	27.41	25.5	12	1622
53	400.424	24.9269	25.5	12	1655
54	399.545	25.0584	25.5	12	1686
55	399.521	24.9531	25.5	12	1717
56	399.362	25.3757	25.5	12	1748
57	397.994	25.2489	25.5	12	1778
58	399.255	24.4191	25.5	12	1810
59	399.982	24.3568	25.5	12	1841
60	400.074	24.5237	25.5	12	1873
61	398.907	25.1362	25.5	12	1905
62	398.794	25.7844	25.5	12	1936
63	398.2	25.7298	25.5	12	1968
64	400.933	24.818	25.5	12	2001
65	400.863	24.7588	25.5	12	2032
66	400.61	25.2257	25.5	12	2063
67	400.835	25.2935	25.5	12	2093
68	400.67	25.8228	25.5	12	2124
69	401.13	25.855	25.5	12	2155
70	398.767	26.8418	25.5	12	2186
71	401.434	25.8742	25.5	12	2217
72	401.486	25.2547	25.5	12	2249
73	400.985	26.7383	25.5	12	2280
74	399.691	27.2017	25.5	12	2310
75	398.648	27.3252	25.5	12	2342
76	399.292	26.8599	25.5	12	2372
77	397.055	27.5321	25.5	12	2403
78	399.152	26.7196	25.5	12	2433
79	399.9	25.5817	25.5	12	2465
80	399.732	26.1086	25.5	12	2494
81	399.766	25.1155	25.5	12	2524
82	399.07	25.6737	25.5	12	2554
83	400.304	24.8795	25.5	12	2584
84	400.074	24.8017	25.5	12	2614
85	399.266	24.9085	25.5	12	2645
86	399.582	23.8707	25.5	12	2674
87	399.413	24.6165	25.5	12	2704
88	398.84	24.8993	25.5	12	2734
89	396.829	26.2565	25.5	12	2765
90	398.211	25.2341	25.5	12	2794
91	398.667	25.4592	25.5	12	2823
92	399.571	24.4503	25.5	12	2854
93	399.862	23.6505	25.5	12	2882
94	399.216	24.1504	25.5	12	2913
95	399.121	24.6151	25.5	12	2943
96	398.209	25.1215	25.5	12	2973
97	397.909	25.5874	25.5	12	3004
98	400.318	24.8874	25.5	12	3034
99	398.576	26.1857	25.5	12	3066
100	398.015	26.9242	25.5	12	3100
101	398.358	26.8007	25.5	12	3131
102	398.309	28.0937	25.5	12	3163
103	397.786	28.4665	25.5	12	3194
104	397.62	27.5073	25.5	12	3227
105	398.197	26.9175	25.5	12	3259
106	398.74	27.5834	25.5	12	3289
107	398.27	27.0966	25.5	12	3320
108	397.828	27.673	25.5	12	3353
109	397.383	27.6226	25.5	12	3382
110	397.309	25.6361	25.5	12	3413
111	396.294	26.8101	25.5	12	3443
112	396.344	25.93	25.5	12	3475
113	396.032	25.8255	25.5	12	3503
114	395.519	26.1331	25.5	12	3534
115	395.16	26.3723	25.5	12	3564
116	394.224	26.2991	25.5	12	3593
117	393.068	26.1968	25.5	12	3623
118	393.737	26.5931	25.5	12	3651
119	394.915	25.7182	25.5	12	3679
120	394.376	26.2472	25.5	12	3709
121	393.05	26.5382	25.5	12	3740
122	392.73	26.4641	25.5	12	3769
123	391.419	26.6738	25.5	12	3800
124	392.599	26.0044	25.5	12	3830
125	392.657	25.4059	25.5	12	3860
126	393.135	24.7291	25.5	12	3890
127	392.3	25.4386	25.5	12	3918
128	391.545	25.7743	25.5	12	3949
129	391.415	25.7404	25.5	12	3979
130	390.052	25.9786	25.5	12	4008
131	390.592	25.2637	25.5	12	4037
132	391.915	23.7936	25.5	12	4065
133	391.453	23.4487	25.5	12	4094
134	390.236	23.9552	25.5	12	4123
135	389.481	24.4763	25.5	12	4152
136	387.972	24.946	25.5	12	4180
137	388.56	24.8014	25.5	12	4205
138	389.303	24.7355	25.5	12	4230
1	467.599	138.138	17.9358	13	12
2	467.783	137.94	18.1765	13	38
3	467.596	137.141	18.2185	13	64
4	467.889	138.48	18.2352	13	92
5	468.095	138.508	18.5742	13	120
6	467.525	138.641	18.5909	13	148
7	467.982	138.223	18.2643	13	177
8	467.857	137.396	18.4743	13	203
9	467.413	136.931	18.4321	13	232
10	467.145	137.039	18.5174	13	261
11	467.214	137.625	18.6157	13	290
12	467.203	138.091	18.8912	13	319
13	467.776	138.011	19.0968	13	347
14	467.304	138.06	18.7818	13	378
15	467.558	137.495	18.9813	13	409
16	467.322	136.86	18.8946	13	439
17	467.203	137.189	18.8442	13	470
18	467.28	137.061	19.1172	13	501
19	467.233	137.009	19.1095	13	532
20	467.095	136.911	19.559	13	565
21	467.243	137.282	19.7175	13	597
22	466.93	136.964	19.4939	13	628
23	467.003	137.064	19.535	13	660
24	467.337	137.886	20.2936	13	693
25	467.287	137.642	20.2545	13	724
26	467.773	138.013	20.3304	13	757
27	468.249	138.878	20.1613	13	789
28	468.332	138.334	20.2562	13	823
29	468.397	138.207	20.4586	13	857
30	468.343	138.378	20.433	13	889
31	468.04	138.906	20.9583	13	923
32	468.406	139.74	20.3487	13	957
33	468.594	139.674	20.4732	13	991
34	468.216	139.202	20.1068	13	1024
35	468.192	139.15	20.2827	13	1056
36	467.866	138.702	19.91	13	1089
37	467.453	138.552	20.0293	13	1122
38	467.83	138.647	19.8066	13	1155
39	467.871	139.207	20.2169	13	1187
40	468.018	139.097	20.2678	13	1220
41	467.98	138.945	20.3447	13	1253
42	467.786	138.92	20.436	13	1284
43	467.575	138.376	20.7099	13	1317
44	467.376	138.387	20.6815	13	1351
45	467.649	138.398	20.8573	13	1385
46	467.709	138.446	21.1661	13	1420
47	467.529	138.577	21.2045	13	1454
48	467.736	138.491	21.0763	13	1487
49	467.791	138.398	21.4414	13	1518
50	467.285	138.062	21.2594	13	1549
51	466.778	138.058	22.1805	13	1582
52	467.23	138.589	22.2177	13	1613
53	466.977	138.623	22.5355	13	1645
54	467.115	139.295	22.5103	13	1676
55	467.59	138.851	21.5984	13	1705
56	467.622	138.636	21.3926	13	1735
57	467.669	138.612	21.6243	13	1767
58	467.334	138.504	22.0181	13	1800
59	467.167	138.97	21.6513	13	1830
60	467.19	139.202	22.241	13	1864
61	467.458	139.543	22.092	13	1896
62	468.158	139.586	22.2965	13	1927
63	468.069	139.783	22.1035	13	1958
64	467.577	139.822	22.4837	13	1990
65	467.877	140.094	22.4746	13	2022
66	468.037	140.332	23.3479	13	2053
67	468.086	140.501	23.1327	13	2083
68	468.291	141.121	23.7292	13	2113
69	468.525	140.879	23.4939	13	2144
70	468.799	140.729	23.7118	13	2175
71	468.886	140.524	23.1175	13	2206
72	468.799	140.225	23.5437	13	2238
73	468.987	141.213	24.2217	13	2270
74	468.565	141.02	25.5	13	2315
75	468.283	141.545	25.5	13	2347
76	468.757	140.674	23.5996	13	2363
77	468.653	140.754	23.5277	13	2394
78	468.319	140.643	25.5	13	2438
79	467.842	140.709	25.5	13	2470
80	468.381	140.768	25.5	13	2499
81	468.441	140.623	25.5	13	2529
82	468.465	140.794	24.0021	13	2547
83	468.018	140.218	25.5	13	2589
84	468.077	140.245	25.5	13	2619
85	467.662	140.271	25.5	13	2650
86	466.671	140.338	25.5	13	2679
87	467.175	140.214	25.5	13	2709
88	467.419	140.448	25.5	13	2739
89	467.733	140.433	25.5	13	2770
90	467.713	140.17	25.5	13	2799
91	467.769	140.017	25.5	13	2828
92	467.339	140.18	25.5	13	2859
93	467.313	139.918	25.5	13	2887
94	467.57	140.148	25.5	13	2918
95	468.027	140.409	25.5	13	2948
96	467.956	140.218	25.5	13	2978
97	468.137	140.316	25.5	13	3009
98	468.296	140.642	25.5	13	3039
99	468.313	141.044	25.5	13	3071
100	468.53	141.658	25.5	13	3105
101	468.372	141.265	25.5	13	3136
102	468.695	141.409	25.5	13	3167
103	469.084	141.877	25.5	13	3200
104	469.032	141.799	25.5	13	3232
105	468.86	142.171	25.5	13	3263
106	467.861	142.239	25.5	13	3294
107	468.905	141.523	25.5	13	3326
1	322.638	173.93	21.2621	14	13
2	324.265	172.48	22.6182	14	41
3	322.071	173.281	21.453	14	66
4	322.061	173.855	21.1617	14	93
5	321.611	173.219	21.0435	14	121
6	322.193	172.513	21.1185	14	149
7	322.194	172.841	21.2138	14	178
8	322.689	172.374	23.4417	14	206
9	322.606	171.739	22.6862	14	235
10	322.324	171.704	22.6728	14	264
11	321.97	171.84	22.2887	14	293
12	322.218	172.039	22.6598	14	321
13	322.091	171.587	22.9734	14	349
14	322.958	171.904	25.5	14	391
15	323.238	170.511	25.5	14	422
16	323.265	171.433	23.1328	14	442
17	322.862	170.846	23.1738	14	473
18	321.873	171.057	23.035	14	504
19	322.143	170.49	22.409	14	534
20	322.892	171.08	22.9151	14	566
21	323.667	168.424	25.5	14	611
22	323.892	169.233	25.5	14	641
23	323.746	167.767	25.5	14	675
24	323.178	167.329	25.5	14	708
25	323.528	167.714	25.5	14	739
26	324.299	168.195	25.5	14	772
27	324.67	167.896	25.5	14	805
28	324.742	168.844	25.5	14	839
29	324.842	170.142	25.5	14	872
30	324.871	169.104	25.5	14	905
31	324.298	168.595	25.5	14	938
32	324.33	168.639	25.5	14	973
33	325.687	167.831	25.5	14	1007
34	325.297	167.845	25.5	14	1039
35	325.037	168.316	25.5	14	1071
36	324.482	167.357	25.5	14	1105
37	323.455	167.681	25.5	14	1137
38	323.126	167.659	25.5	14	1171
39	322.835	167.734	25.5	14	1204
40	323.619	167.897	25.5	14	1237
41	324.416	167.827	25.5	14	1268
42	324.198	168.211	25.5	14	1300
43	323.334	169.087	25.5	14	1334
44	321.906	167.081	25.5	14	1369
45	321.768	166.761	25.5	14	1404
46	321.861	167.34	25.5	14	1438
47	322.966	167.544	25.5	14	1471
48	323.125	167.535	25.5	14	1502
49	323.318	168.495	25.5	14	1533
50	322.971	167.443	25.5	14	1564
51	321.644	166.806	25.5	14	1596
52	321.866	167.897	25.5	14	1628
53	320.921	167.433	25.5	14	1661
54	321.499	168.721	25.5	14	1692
55	322.772	167.769	25.5	14	1723
56	322.89	167.143	25.5	14	1754
57	322.855	166.911	25.5	14	1784
58	322.273	166.861	25.5	14	1816
59	321.804	167.021	25.5	14	1847
60	322.348	167.643	25.5	14	1879
61	323.168	167.519	25.5	14	1911
62	323.613	167.09	25.5	14	1942
63	323.557	167.308	25.5	14	1974
64	321.88	167.25	25.5	14	2007
65	321.43	167.934	25.5	14	2038
66	322.43	169.463	25.5	14	2069
67	322.898	169.05	25.5	14	2099
68	324.105	168.157	25.5	14	2130
69	323.121	167.65	25.5	14	2161
70	324.373	167.874	25.5	14	2192
71	323.423	168.851	25.5	14	2223
72	322.403	168.619	25.5	14	2255
73	323.743	169.663	25.5	14	2286
74	323.131	169.759	25.5	14	2317
75	322.819	170.167	25.5	14	2349
76	322.078	169.042	25.5	14	2378
77	322.739	168.371	25.5	14	2409
78	322.033	169.061	25.5	14	2440
79	321.036	169.726	25.5	14	2472
80	322.38	168.903	25.5	14	2501
81	322.608	168.823	25.5	14	2531
82	322.603	167.432	25.5	14	2560
83	321.885	167.627	25.5	14	2591
84	322.706	167.808	25.5	14	2621
85	322.406	167.205	25.5	14	2652
86	320.466	167.321	25.5	14	2681
87	322.36	166.549	25.5	14	2711
88	322.811	166.331	25.5	14	2741
89	323.416	165.633	25.5	14	2772
90	323.18	165.759	25.5	14	2801
91	322.497	165.598	25.5	14	2830
92	320.793	166.708	25.5	14	2861
93	321.129	166.728	25.5	14	2889
94	322.438	165.999	25.5	14	2920
95	323.087	166.007	25.5	14	2950
96	323.103	164.817	25.5	14	2980
97	323.369	165.541	25.5	14	3011
98	322.99	166.274	25.5	14	3041
99	322.014	166.984	25.5	14	3073
100	323.634	165.82	25.5	14	3107
101	323.623	167.142	25.5	14	3138
102	324.251	166.057	25.5	14	3169
103	323.916	166.208	25.5	14	3201
104	323.424	166.412	25.5	14	3234
105	323.246	167.033	25.5	14	3265
106	323.137	168.168	25.5	14	3296
107	323.542	167.558	25.5	14	3328
108	324.896	166.933	25.5	14	3359
109	324.773	165.869	25.5	14	3389
110	323.334	166.642	25.5	14	3419
111	324.241	166.148	25.5	14	3450
112	324.586	166.894	25.5	14	3482
113	324.335	166.434	25.5	14	3510
114	324.418	165.846	25.5	14	3541
115	324.697	165.824	25.5	14	3571
116	324.59	165.629	25.5	14	3600
117	323.642	165.078	25.5	14	3630
118	324.198	166.714	25.5	14	3657
119	323.844	166.723	25.5	14	3687
120	324.996	165.999	25.5	14	3717
121	325.234	165.353	25.5	14	3747
122	325.427	166.136	25.5	14	3777
123	325.529	166.009	25.5	14	3807
124	323.115	165.54	25.5	14	3837
125	321.998	165.514	25.5	14	3867
126	320.998	166.132	25.5	14	3896
127	322.583	164.596	25.5	14	3926
128	322.374	163.829	25.5	14	3956
129	322.469	163.548	25.5	14	3986
130	322.368	163.185	25.5	14	4015
131	321.96	163.918	25.5	14	4044
132	320.492	164.724	25.5	14	4073
133	319.867	164.045	25.5	14	4102
134	321.135	164.312	25.5	14	4131
135	321.822	162.812	25.5	14	4159
136	321.548	162.526	25.5	14	4185
137	322.284	163.123	25.5	14	4209
138	322.028	163.424	25.5	14	4234
1	446.83	44.1837	24.0093	15	14
2	444.831	44.6817	24.007	15	39
3	445.082	44.5759	25.5	15	73
4	444.23	45.3485	25.5	15	101
5	443.221	45.9251	25.5	15	129
6	442.826	46.081	25.5	15	156
7	442.135	45.7182	25.5	15	184
8	441.064	45.5579	25.5	15	213
9	441.268	45.5691	25.5	15	242
10	441.966	45.7849	25.5	15	271
11	442.405	45.6489	25.5	15	300
12	441.826	45.5184	25.5	15	327
13	441.945	45.2708	25.5	15	356
14	441.409	45.8473	25.5	15	386
15	441.747	45.2143	25.5	15	418
16	442.311	45.046	25.5	15	450
17	444.725	44.7681	25.5	15	481
18	445.302	44.0949	25.5	15	512
19	445.016	43.8323	25.5	15	542
20	444.252	44.3457	25.5	15	574
21	443.748	44.6396	25.5	15	606
22	441.802	44.8217	25.5	15	636
23	444.493	44.882	25.5	15	670
24	446.526	44.1015	25.5	15	703
25	445.683	44.7595	25.5	15	734
26	445.466	44.9724	25.5	15	767
27	444.601	45.4393	25.5	15	800
28	446.386	45.1161	25.5	15	835
29	444.678	45.1145	25.5	15	867
30	447.29	45.0861	25.5	15	900
31	448.104	44.3763	25.5	15	933
32	448.845	44.379	25.5	15	968
33	446.51	44.8493	25.5	15	1002
34	445.534	45.0261	25.5	15	1034
35	441.436	45.9103	25.5	15	1066
36	447.133	44.1395	25.5	15	1101
37	449.732	43.391	25.5	15	1132
38	451.305	42.2846	25.5	15	1166
39	452.034	41.8175	25.5	15	1199
40	451.861	41.6509	25.5	15	1232
41	451.023	41.6095	25.5	15	1263
42	449.848	41.2306	25.5	15	1295
43	451.432	41.4052	25.5	15	1329
44	453.143	40.2524	25.5	15	1364
45	452.898	40.1813	25.5	15	1399
46	452.868	40.0409	25.5	15	1433
47	451.943	40.7384	25.5	15	1466
48	451.588	41.1556	25.5	15	1497
49	450.019	40.9732	25.5	15	1528
50	450.889	40.8747	25.5	15	1559
51	452.604	40.028	25.5	15	1591
52	452.508	41.1748	25.5	15	1623
53	451.907	41.5	25.5	15	1656
54	451.013	42.2378	25.5	15	1687
55	451.497	41.7198	25.5	15	1718
56	451.35	41.6792	25.5	15	1749
57	451.046	41.6967	25.5	15	1779
58	452.255	41.0645	25.5	15	1811
59	452.559	41.0288	25.5	15	1842
60	452.351	41.4986	25.5	15	1874
61	450.498	42.093	25.5	15	1906
62	449.983	42.3598	25.5	15	1937
63	450.467	42.5029	25.5	15	1969
64	453.299	42.0389	25.5	15	2002
65	453.181	42.3177	25.5	15	2033
66	453.061	42.8312	25.5	15	2064
67	452.611	42.9416	25.5	15	2094
68	451.667	43.469	25.5	15	2125
69	453.846	42.8566	25.5	15	2156
70	451.413	43.5116	25.5	15	2187
71	453.15	42.9314	25.5	15	2218
72	453.751	42.7557	25.5	15	2250
73	453.321	43.4102	25.5	15	2281
74	453.015	43.5823	25.5	15	2311
75	451.763	43.366	25.5	15	2343
76	453.623	42.5696	25.5	15	2373
77	451.841	43.0666	25.5	15	2404
78	453.567	42.4815	25.5	15	2434
79	454.039	41.7955	25.5	15	2466
80	452.34	42.9105	25.5	15	2495
81	452.506	42.4449	25.5	15	2525
82	451.549	42.4334	25.5	15	2555
83	454.073	41.4791	25.5	15	2585
84	453.858	41.4389	25.5	15	2615
85	451.947	41.4132	25.5	15	2646
86	453.262	40.9269	25.5	15	2675
87	452.112	41.3919	25.5	15	2705
88	451.275	41.2967	25.5	15	2735
89	450.083	41.7294	25.5	15	2766
90	452.282	41.7401	25.5	15	2795
91	453.021	41.2607	25.5	15	2824
92	454.012	40.6433	25.5	15	2855
93	453.218	40.9685	25.5	15	2883
94	452.06	41.4588	25.5	15	2914
95	451.271	41.715	25.5	15	2944
96	450.102	41.8907	25.5	15	2974
97	451.729	42.2954	25.5	15	3005
98	453.983	42.0906	25.5	15	3035
99	454.909	47.7343	25.5	15	3067
100	452.205	43.187	25.5	15	3101
101	452.958	43.2842	25.5	15	3132
102	450.939	43.7922	25.5	15	3164
103	450.675	44.0836	25.5	15	3195
104	453.342	43.5013	25.5	15	3228
105	454.573	43.2385	25.5	15	3260
106	454.159	44.1065	25.5	15	3290
107	454.287	43.79	25.5	15	3321
108	453.197	44.0347	25.5	15	3354
109	451.929	43.8432	25.5	15	3383
110	455.657	42.4118	25.5	15	3414
111	452.816	43.4979	25.5	15	3444
112	452.835	43.343	25.5	15	3476
113	453.267	43.3829	25.5	15	3504
114	452.175	43.4184	25.5	15	3535
115	451.883	43.4247	25.5	15	3565
116	450.236	43.6194	25.5	15	3594
117	452.496	48.6659	25.5	15	3624
118	453.219	48.6777	25.5	15	3652
119	454.283	48.8313	25.5	15	3680
120	452.201	48.7973	25.5	15	3710
121	450.714	43.1368	25.5	15	3741
122	450.968	42.3567	25.5	15	3770
123	448.706	42.92	25.5	15	3801
124	452.185	48.5418	25.5	15	3831
125	452.547	48.0259	25.5	15	3861
126	452.081	41.3188	25.5	15	3891
127	450.611	41.5147	25.5	15	3919
128	450.483	41.6688	25.5	15	3950
129	450.167	40.7317	25.5	15	3980
130	449.168	41.5137	25.5	15	4009
131	452.595	47.31	25.5	15	4038
132	453.273	47.0843	25.5	15	4066
133	454.244	46.7088	25.5	15	4095
134	453.17	53.7816	25.5	15	4124
1	409.898	141.969	22.3146	16	15
2	410.198	141.823	22.472	16	40
3	410.025	142.351	21.5808	16	65
4	409.967	142.143	22.87	16	94
5	409.539	141.81	23.4555	16	122
6	409.607	141.433	25.5	16	160
7	409.576	141.33	24.2	16	179
8	409.89	141.401	22.7106	16	205
9	409.773	141.453	22.4751	16	234
10	409.578	141.371	22.2635	16	263
11	409.625	141.48	23.7792	16	292
12	409.345	141.255	25.5	16	331
13	408.972	140.947	25.5	16	360
14	409.1	141.488	25.5	16	390
15	409.627	141.005	23.5965	16	411
16	409.734	141.189	23.2317	16	441
17	409.786	141.642	22.9118	16	472
18	409.476	141.385	23.0526	16	503
19	409.284	140.909	25.5	16	546
20	409.404	140.875	25.5	16	578
21	409.613	141.039	25.5	16	610
22	409.813	141.147	25.5	16	640
23	409.773	141.478	25.5	16	674
24	409.664	141.788	25.5	16	707
25	409.378	141.989	25.5	16	738
26	409.211	142.171	25.5	16	771
27	409.892	142.576	25.5	16	804
28	409.986	142.438	23.7532	16	825
29	410.4	143.102	25.5	16	871
30	410.975	142.52	25.5	16	904
31	409.474	143.052	25.5	16	937
32	410.316	142.961	25.5	16	972
33	410.584	142.369	25.5	16	1006
34	410.681	142.423	25.5	16	1038
35	410.754	142.276	25.5	16	1070
36	410.51	142.212	24.0861	16	1091
37	410.141	142.098	25.5	16	1136
38	410.657	142.006	25.5	16	1170
39	410.393	141.879	25.5	16	1203
40	409.37	142.1	25.5	16	1236
41	409.867	141.862	25.5	16	1267
42	409.725	142.089	25.5	16	1299
43	410.047	141.569	25.5	16	1333
44	409.79	141.97	25.5	16	1368
45	409.547	141.924	25.5	16	1403
46	409.374	141.658	25.5	16	1437
47	409.356	141.619	25.5	16	1470
48	410.337	141.108	25.5	16	1501
49	410.111	141.11	25.5	16	1532
50	409.895	140.889	25.5	16	1563
51	409.289	141.233	25.5	16	1595
52	409.475	142.183	25.5	16	1627
53	408.387	141.841	25.5	16	1660
54	408.599	142.191	25.5	16	1691
55	409.889	141.428	25.5	16	1722
56	409.726	141.048	25.5	16	1753
57	409.629	141.335	25.5	16	1783
58	409.692	141.641	25.5	16	1815
59	409.475	141.959	25.5	16	1846
60	409.41	142.305	25.5	16	1878
61	410.076	141.684	25.5	16	1910
62	410.596	141.558	25.5	16	1941
63	410.57	141.922	25.5	16	1973
64	409.895	142.907	25.5	16	2006
65	410.31	143.343	25.5	16	2037
66	409.767	143.601	25.5	16	2068
67	409.539	143.695	25.5	16	2098
68	410.838	143.164	25.5	16	2129
69	411.071	143.419	25.5	16	2160
70	411.241	142.884	25.5	16	2191
71	409.753	143.268	25.5	16	2222
72	410.189	143.609	25.5	16	2254
73	410.612	144.527	25.5	16	2285
74	409.494	144.096	25.5	16	2316
75	410.057	143.752	25.5	16	2348
76	410.045	143.831	25.5	16	2377
77	410.317	142.786	25.5	16	2408
78	410.706	143.207	25.5	16	2439
79	409.997	143.807	25.5	16	2471
80	410.225	143.486	25.5	16	2500
81	410.045	144.142	25.5	16	2530
82	409.765	143.239	25.5	16	2559
83	409.558	143.632	25.5	16	2590
84	409.745	143.593	25.5	16	2620
85	409.233	143.318	25.5	16	2651
86	408.081	143.93	25.5	16	2680
87	408.597	143.599	25.5	16	2710
88	408.854	143.043	25.5	16	2740
89	409.459	142.53	25.5	16	2771
90	409.391	142.428	25.5	16	2800
91	409.345	142.379	25.5	16	2829
92	407.938	143.046	25.5	16	2860
93	408.507	143.716	25.5	16	2888
94	408.943	143.231	25.5	16	2919
95	409.599	143.084	25.5	16	2949
96	409.878	142.522	25.5	16	2979
97	409.848	142.586	25.5	16	3010
98	409.833	143.822	25.5	16	3040
99	409.19	144.151	25.5	16	3072
100	409.559	143.041	25.5	16	3106
101	409.867	143.122	25.5	16	3137
102	410.342	142.251	25.5	16	3168
103	410.603	142.441	25.5	16	3199
104	409.929	143.014	25.5	16	3233
105	410.292	144.254	25.5	16	3264
106	408.765	145.592	25.5	16	3295
107	409.651	145.102	25.5	16	3327
108	410.451	144.421	25.5	16	3358
109	410.263	143.308	25.5	16	3388
110	409.845	144.028	25.5	16	3418
111	410.395	143.422	25.5	16	3449
112	409.675	144.287	25.5	16	3481
113	409.107	143.939	25.5	16	3509
114	409.98	143.625	25.5	16	3540
115	409.863	143.06	25.5	16	3570
116	409.679	142.416	25.5	16	3599
117	409.448	142.139	25.5	16	3629
118	408.838	143.208	25.5	16	3656
119	408.485	143.321	25.5	16	3685
120	404.722	139.37	25.5	16	3714
121	404.681	138.714	25.5	16	3745
122	403.523	138.027	25.5	16	3774
123	402.928	137.683	25.5	16	3805
124	402.778	138.288	25.5	16	3835
125	403.317	138.153	25.5	16	3865
126	401.532	137.939	25.5	16	3894
127	402.237	136.629	25.5	16	3923
128	402.094	137.298	25.5	16	3954
129	401.369	134.785	25.5	16	3984
130	400.589	139.716	25.5	16	4013
131	402.764	136.38	25.5	16	4042
132	407.339	140.296	25.5	16	4070
133	401.441	136.474	25.5	16	4099
134	400.713	137.726	25.5	16	4128
135	401.483	137.333	25.5	16	4156
136	401.808	136.056	25.5	16	4183
137	401.272	135.929	25.5	16	4207
138	401.767	135.927	25.5	16	4232
1	112.943	410.023	20.1791	17	16
2	113.05	410.223	20.245	17	42
3	112.976	410.688	20.3617	17	67
4	112.584	410.403	20.3258	17	95
5	112.687	410.685	20.6259	17	123
6	112.808	410.657	20.9016	17	150
7	112.879	410.317	20.4997	17	180
8	112.729	409.76	20.017	17	207
9	112.164	409.482	20.1083	17	236
10	112.508	409.883	20.186	17	265
11	112.641	409.693	20.5563	17	294
12	112.825	409.031	21.1411	17	322
13	112.756	408.669	21.4861	17	350
14	112.679	409.075	20.7463	17	380
15	112.837	409.261	20.9239	17	412
16	112.603	409.762	20.5562	17	443
17	112.43	409.755	20.7469	17	474
18	113.19	408.95	21.0345	17	505
19	113.136	409.254	21.2879	17	535
20	113.303	409.236	20.931	17	567
21	113.223	409.305	20.842	17	598
22	113.039	409.089	21.3483	17	630
23	113.111	409.07	21.2272	17	662
24	113.548	408.917	21.66	17	695
25	113.843	408.817	22.7091	17	727
26	113.899	409.672	23.4016	17	760
27	114.035	409.844	21.8665	17	792
28	114.207	409.515	21.8481	17	827
29	114.351	409.468	21.9905	17	860
30	114.436	409.395	22.59	17	893
31	114.106	409.499	24.1485	17	926
32	114.234	409.939	22.9708	17	960
33	114.438	409.738	21.9425	17	994
34	114.35	409.869	22.8018	17	1028
35	114.241	409.991	21.9348	17	1060
36	113.492	410.058	21.5389	17	1093
37	112.898	409.448	21.5914	17	1124
38	113.503	409.928	21.6302	17	1157
39	113.818	409.552	21.9566	17	1190
40	113.44	409.576	23.0677	17	1223
41	113.42	409.518	21.5911	17	1256
42	113.352	409.41	21.4853	17	1288
43	113.248	409.349	21.4857	17	1322
44	113.159	409.349	21.8022	17	1356
45	113.178	408.816	22.8923	17	1390
46	112.965	409.662	22.8871	17	1424
47	113.533	409.315	22.663	17	1457
48	113.171	409.192	22.4621	17	1490
49	113.05	409.13	22.2424	17	1522
50	112.774	409.043	21.73	17	1553
51	113.265	408.147	23.1451	17	1584
52	113.245	408.611	22.6001	17	1616
53	112.818	408.174	24.0091	17	1648
54	113.255	408.723	22.6255	17	1679
55	113.267	409.015	22.6078	17	1710
56	113.276	409.105	22.7235	17	1741
57	112.922	409.929	23.4621	17	1772
58	113.339	409.312	22.0274	17	1804
59	113.399	409.596	22.9352	17	1836
60	113.267	410.899	23.4949	17	1868
61	113.316	410.776	22.6217	17	1900
62	113.38	411.283	22.6347	17	1931
63	113.413	410.905	22.7302	17	1962
64	113.413	411.473	22.7803	17	1994
65	113.375	411.897	23.0712	17	2027
66	113.806	412.419	23.8017	17	2058
67	114.034	412.579	22.8122	17	2088
68	114.094	412.475	22.4653	17	2118
69	113.731	412.778	22.884	17	2149
70	113.856	412.78	22.2827	17	2180
71	114.148	412.806	22.9856	17	2211
72	114.117	412.891	22.853	17	2243
73	114.222	413.344	23.0534	17	2274
74	114.323	412.739	23.7261	17	2304
75	114.267	412.029	22.9499	17	2337
76	113.905	412.448	23.3195	17	2368
77	113.732	412.389	25.5	17	2412
78	113.829	412.061	23.0315	17	2429
79	113.639	412.117	23.3862	17	2460
80	114.175	411.826	23.3144	17	2490
81	114.164	411.713	23.15	17	2520
82	113.864	411.566	23.3188	17	2550
83	113.367	411.914	23.1872	17	2579
84	113.491	411.523	23.1639	17	2609
85	113.581	411.108	23.5523	17	2640
86	112.479	411.501	25.5	17	2684
87	113.23	411.285	23.8017	17	2700
88	113.099	411.054	23.6508	17	2730
89	113.1	410.919	23.8728	17	2761
90	112.841	411.314	23.6677	17	2790
91	112.833	410.814	23.7683	17	2819
92	112.266	412.147	23.7672	17	2849
93	112.362	412.061	25.5	17	2892
94	113.214	411.22	23.5688	17	2909
95	113.654	410.404	24.0223	17	2939
96	113.515	409.657	23.4865	17	2969
97	113.984	408.215	23.9412	17	3000
98	114.498	406.939	25.5	17	3046
99	113.71	400.869	25.5	17	3078
100	116.705	395.964	23.3656	17	3096
101	119.361	391.669	21.024	17	3127
102	120.966	389.718	20.277	17	3159
103	121.896	386.72	19.6074	17	3189
104	121.439	385.94	19.0156	17	3221
105	122.724	384.882	18.8391	17	3253
106	124.463	382.565	18.6098	17	3284
107	125.807	378.963	18.1484	17	3314
108	123.488	376.736	18.1861	17	3347
109	118.454	373.03	18.6977	17	3377
1	116.633	470.798	22.4762	18	17
2	116.358	470.377	23.764	18	43
3	116.929	470.625	23.2116	18	68
4	116.977	470.846	22.4924	18	96
5	115.85	470.848	23.1935	18	124
6	116.367	470.863	22.7161	18	151
7	116.305	469.807	25.5	18	189
8	116.451	469.69	23.8936	18	208
9	115.675	469.358	23.7997	18	237
10	115.926	469.829	22.3712	18	266
11	116.63	470.1	23.0908	18	295
12	116.111	469.959	25.5	18	334
13	116.096	469.472	25.5	18	363
14	115.834	470.514	25.5	18	394
15	116.165	470.823	23.8829	18	413
16	115.836	470.212	23.5776	18	444
17	116.542	469.975	22.6549	18	475
18	115.744	469.593	23.1213	18	506
19	116.385	469.448	22.2093	18	536
20	117.168	469.524	23.1042	18	568
21	116.208	469.985	24.0374	18	599
22	116.731	469.406	25.5	18	644
23	115.699	469.949	23.6461	18	663
24	115.953	470.548	24.016	18	696
25	116.304	470.7	25.5	18	742
26	116.764	470.962	25.5	18	775
27	116.099	471.67	25.5	18	808
28	115.972	471.379	25.5	18	842
29	115.821	471.945	25.5	18	875
30	116.365	471.733	25.5	18	908
31	116.758	472.673	25.5	18	941
32	116.362	472.628	25.5	18	976
33	117.563	471.502	23.7681	18	995
34	117.958	471.161	25.5	18	1042
35	118.289	470.956	25.5	18	1074
36	117.59	470.985	23.8965	18	1094
37	117.367	470.866	23.7558	18	1125
38	117.343	470.751	23.713	18	1158
39	116.92	471.495	23.5813	18	1191
40	115.788	472.723	23.7019	18	1224
41	115.437	471.323	25.5	18	1271
42	116.307	470.828	25.5	18	1303
43	116.23	470.825	25.5	18	1337
44	115.652	470.758	25.5	18	1372
45	115.855	470.806	24.1269	18	1391
46	116.663	470.632	23.8311	18	1425
47	116.964	470.668	23.9794	18	1458
48	115.665	471.354	23.8279	18	1491
49	116.029	470.676	25.5	18	1536
50	115.669	470.892	25.5	18	1567
51	114.796	472.098	25.5	18	1599
52	110.431	476.448	25.5	18	1631
53	111.238	476.725	25.5	18	1663
54	110.903	477.885	25.5	18	1695
55	111.749	475.367	25.5	18	1726
56	114.981	471	25.5	18	1757
57	114.989	470.569	25.5	18	1787
58	103.373	473.909	11.4534	18	1791
59	103.802	471.865	11.2134	18	1822
60	103.769	471.15	11.1436	18	1854
61	103.925	471.612	11.2281	18	1886
62	104.351	472.109	11.3702	18	1918
63	103.561	471.266	11.3208	18	1949
64	100.841	468.688	11.6176	18	1981
65	99.7296	466.807	12.1599	18	2014
1	423.057	279.285	19.5644	19	18
2	424.831	279.152	19.7824	19	44
3	423.29	278.804	19.6106	19	69
4	423.237	278.612	19.1141	19	97
5	423.076	278.61	19.2563	19	125
6	422.907	279.184	19.8781	19	152
7	422.809	278.75	19.8014	19	181
8	422.89	278.609	19.772	19	209
9	424.03	279.176	20.0017	19	238
10	423.628	279.513	20.7332	19	267
11	423.728	279.549	20.466	19	296
12	421.21	278.542	21.4285	19	323
13	422.314	279.531	21.5718	19	351
14	426.201	280.733	22.2094	19	381
15	426.857	279.605	21.471	19	414
16	426.737	279.946	21.9352	19	445
17	423.18	279.291	20.5441	19	476
18	422.662	279.078	20.335	19	507
19	422.278	278.353	20.8388	19	538
20	422.638	279.224	20.9539	19	570
21	423.434	279.17	21.0781	19	602
22	428.01	280.753	22.4129	19	632
23	430.042	281.624	23.736	19	666
24	427.052	280.051	22.1576	19	698
25	424.521	279.263	20.2963	19	729
26	424.467	279.594	20.7156	19	762
27	429.206	281.319	22.63	19	794
28	431.04	282.146	24.0514	19	831
29	433.988	283.282	25.5	19	876
30	433.461	283.147	25.5	19	909
31	433.259	283.012	25.5	19	942
32	428.712	281.32	23.1835	19	961
33	434.373	283.634	25.5	19	1010
34	436.941	284.033	25.5	19	1043
35	433.668	283.128	25.5	19	1075
36	431.004	282.412	23.6024	19	1098
37	431.082	282.479	25.5	19	1140
38	425.397	280.501	22.3586	19	1162
39	425.099	280.447	22.4721	19	1195
40	423.891	280.267	22.0099	19	1228
41	425.785	280.247	22.2108	19	1259
42	433.066	282.908	25.5	19	1304
43	430.979	282.047	25.5	19	1338
44	427.681	280.787	24.3932	19	1359
45	427.582	280.587	24.4583	19	1395
46	424.009	279.496	22.9486	19	1428
47	427.1	280.471	24.097	19	1461
48	431.785	281.455	25.5	19	1505
49	429.072	280.423	25.5	19	1537
50	428.978	280.641	25.5	19	1568
51	430.127	280.74	25.5	19	1600
52	426.745	280.448	25.5	19	1632
53	422.825	279.57	23.7672	19	1650
54	423.584	280.07	23.9258	19	1681
55	424.331	279.995	23.8804	19	1712
56	423.685	279.95	23.921	19	1743
57	423.627	279.486	23.7819	19	1774
58	425.879	280.688	24.6162	19	1806
59	422.639	280.076	25.5	19	1850
60	422.508	280.144	25.5	19	1882
61	431.689	282.649	25.5	19	1914
62	431.478	282.506	25.5	19	1945
63	430.767	282.442	25.5	19	1977
64	423.284	280.553	25.5	19	2010
65	425.149	280.567	25.5	19	2042
66	423.887	280.32	25.5	19	2073
67	426.769	281.779	25.5	19	2103
68	431.266	283.319	25.5	19	2134
69	430.916	283.285	25.5	19	2165
70	431.795	283.318	25.5	19	2196
71	431.338	282.964	25.5	19	2227
72	432.266	283.152	25.5	19	2259
73	430.203	282.595	25.5	19	2289
74	434.502	284.849	25.5	19	2321
75	428.787	282.936	25.5	19	2352
76	435.158	285.172	25.5	19	2382
77	428.512	281.605	25.5	19	2414
78	426.231	281.453	25.5	19	2444
79	424.224	280.699	25.5	19	2476
80	426.19	281.607	25.5	19	2505
81	429.4	283.217	25.5	19	2534
82	433.852	283.964	25.5	19	2564
83	435.56	284.973	25.5	19	2595
84	435.091	284.637	25.5	19	2625
85	434.698	284.051	25.5	19	2656
86	432.317	283.039	25.5	19	2686
87	427.747	281.144	25.5	19	2715
88	428.633	281.406	25.5	19	2745
89	428.009	281.306	25.5	19	2776
90	430.337	282.346	25.5	19	2805
91	430.834	282.421	25.5	19	2834
92	425.921	280.306	25.5	19	2865
93	431.787	282.436	25.5	19	2894
94	433.243	283.347	25.5	19	2924
95	434.425	283.851	25.5	19	2954
96	430.507	282.291	25.5	19	2985
97	427.152	281.055	25.5	19	3016
98	425.468	281.05	25.5	19	3048
99	424.953	281.44	25.5	19	3080
100	428.859	282.372	25.5	19	3111
101	431.043	283.167	25.5	19	3143
102	430.944	283.283	25.5	19	3174
103	428.371	282.269	25.5	19	3207
104	424.533	281.65	25.5	19	3239
105	431.573	283.49	25.5	19	3270
106	428.033	282.828	25.5	19	3301
107	431.719	283.483	25.5	19	3333
108	430.991	283.367	25.5	19	3363
109	427.924	282.025	25.5	19	3394
110	423.558	280.282	25.5	19	3424
111	422.685	280.456	25.5	19	3455
112	422.637	280.506	25.5	19	3486
113	423.916	280.963	25.5	19	3515
114	423.165	280.477	25.5	19	3545
115	428.256	281.725	25.5	19	3575
116	426.505	280.98	25.5	19	3604
117	424.495	280.389	25.5	19	3634
118	424.989	281.558	25.5	19	3661
119	428.964	282.098	25.5	19	3691
120	428.276	281.751	25.5	19	3721
121	427.511	281.392	25.5	19	3751
122	424.825	280.343	25.5	19	3781
123	422.782	280.092	25.5	19	3811
124	421.79	279.446	25.5	19	3841
125	421.749	278.898	25.5	19	3871
126	422.084	279.386	25.5	19	3900
127	423.124	279.786	25.5	19	3930
128	422.987	280.052	25.5	19	3960
129	423.922	279.873	25.5	19	3990
130	421.326	279.2	25.5	19	4019
131	422.046	279.604	25.5	19	4048
132	422.393	278.922	25.5	19	4077
133	422.052	278.993	25.5	19	4106
134	422.5	278.833	25.5	19	4135
135	422.606	279.421	25.5	19	4162
136	422.538	278.967	25.5	19	4189
137	421.31	278.693	25.5	19	4213
138	422.871	279.373	25.5	19	4238
1	283.739	307.772	19.9201	20	19
2	283.835	307.653	21.355	20	45
3	283.884	307.766	20.4526	20	70
4	283.581	307.828	20.2965	20	98
5	283.273	307.891	20.288	20	126
6	283.251	307.832	20.4034	20	153
7	283.175	307.527	20.2968	20	182
8	283.344	307.554	21.8151	20	210
9	283.452	307.524	22.146	20	239
10	283.871	307.692	21.134	20	268
11	283.386	307.468	20.7551	20	297
12	282.952	307.342	21.5497	20	324
13	282.892	307.149	21.0351	20	352
14	282.527	307.717	21.4244	20	382
15	283.231	307.452	22.1282	20	415
16	283.402	307.543	22.3807	20	446
17	282.927	306.887	20.5862	20	477
18	281.806	306.15	20.2772	20	508
19	279.768	305.067	19.1346	20	537
20	280.523	305.005	19.1952	20	569
21	280.398	305.026	19.2208	20	601
22	280.497	304.887	19.7102	20	633
23	280.637	305.016	19.6898	20	665
24	279.931	305.166	19.6597	20	699
25	279.557	305.176	19.8666	20	730
26	279.971	305.3	19.3291	20	763
27	280.658	305.387	19.3742	20	795
28	281.514	305.604	19.5004	20	829
29	281.085	305.313	20.0937	20	862
30	281.252	305.698	19.879	20	895
31	280.866	305.804	20.1926	20	928
32	280.978	306.213	20.1326	20	963
33	280.906	306.075	19.823	20	997
34	281.082	305.796	20.4845	20	1030
35	281.045	305.745	20.0663	20	1061
36	280.902	305.626	19.921	20	1096
37	280.908	305.736	19.7503	20	1127
38	280.381	305.847	19.6893	20	1160
39	279.792	305.822	19.7757	20	1193
40	279.559	305.826	19.3449	20	1226
41	280.319	305.394	19.9124	20	1257
42	280.101	305.142	20.1704	20	1290
43	280.247	305.122	19.9804	20	1324
44	280.171	305.044	19.9211	20	1358
45	279.819	305.267	20.2395	20	1393
46	279.834	305.54	19.7661	20	1427
47	279.5	305.2	19.7682	20	1460
48	280.681	305.161	20.0249	20	1492
49	280.119	304.888	20.4179	20	1523
50	279.597	304.287	20.1375	20	1554
51	279.561	304.303	21.0746	20	1585
52	279.701	305.133	20.5368	20	1617
53	278.345	304.982	20.1491	20	1649
54	278.924	305.482	19.691	20	1680
55	280.523	305.084	19.6299	20	1711
56	280.038	304.775	20.1195	20	1742
57	280.127	305.037	20.4823	20	1773
58	279.807	305.13	20.8348	20	1805
59	279.06	305.252	20.9591	20	1837
60	279.169	305.582	20.7228	20	1869
61	279.645	305.365	20.9006	20	1901
62	279.503	305.587	21.152	20	1932
63	279.997	305.672	20.89	20	1964
64	278.404	306.292	19.4171	20	1997
1	110.567	133.434	25.5	21	20
2	111.128	133.624	25.5	21	47
3	110.656	133.576	25.5	21	72
4	110.537	134.482	25.5	21	100
5	109.964	134.468	25.5	21	128
6	110.222	134.69	25.5	21	155
7	110.68	134.471	25.5	21	183
8	110.65	133.907	25.5	21	212
9	110.951	133.22	25.5	21	241
10	110.601	133.838	25.5	21	270
11	109.991	133.788	25.5	21	299
12	110.412	133.618	25.5	21	326
13	110.725	133.37	25.5	21	354
14	110.198	134.043	25.5	21	384
15	110.648	133.723	25.5	21	417
16	110.939	133.733	25.5	21	448
17	111.707	133.983	25.5	21	479
18	112.524	133.893	25.5	21	510
19	111.774	133.879	25.5	21	540
20	111.63	133.934	25.5	21	572
21	111.738	133.928	25.5	21	604
22	112.636	133.794	25.5	21	635
23	112.424	133.974	25.5	21	668
24	113.118	134.342	25.5	21	701
25	112.961	134.727	25.5	21	732
26	113.777	134.747	25.5	21	765
27	114.177	135.093	25.5	21	798
28	115.123	135.033	25.5	21	833
29	115.893	135.558	25.5	21	865
30	116.226	135.634	25.5	21	898
31	115.378	136.333	25.5	21	931
32	115.173	136.596	25.5	21	966
33	114.962	136.05	25.5	21	1000
34	114.802	135.903	25.5	21	1033
35	114.361	135.803	25.5	21	1064
36	112.372	136.378	25.5	21	1100
37	113.384	135.491	25.5	21	1130
38	112.564	135.705	25.5	21	1164
39	112.396	135.814	25.5	21	1197
40	112.371	135.686	25.5	21	1230
41	113.445	134.781	25.5	21	1261
42	113.984	135.295	25.5	21	1293
43	113.141	135.442	25.5	21	1327
44	112.129	135.372	25.5	21	1362
45	113.074	135.373	25.5	21	1397
46	112.839	135.041	25.5	21	1431
47	113.212	135.318	25.5	21	1464
48	115.232	134.786	25.5	21	1495
49	114.77	134.915	25.5	21	1526
50	114.406	134.411	25.5	21	1557
51	114.068	134.714	25.5	21	1589
52	114.037	136.061	25.5	21	1621
53	113.571	135.755	25.5	21	1654
54	114.245	136.405	25.5	21	1685
55	114.032	135.922	25.5	21	1716
56	113.314	135.708	25.5	21	1747
57	113.722	135.673	25.5	21	1777
58	112.75	135.666	25.5	21	1809
59	113.882	135.217	25.5	21	1840
60	113.879	135.461	25.5	21	1872
61	114.178	135.667	25.5	21	1904
62	113.752	136.357	25.5	21	1935
63	115.245	135.771	25.5	21	1967
64	114.709	136.983	25.5	21	2000
65	114.402	137.134	25.5	21	2031
66	114.81	137.379	25.5	21	2062
67	114.736	137.585	25.5	21	2092
68	114.898	137.076	25.5	21	2123
69	115.55	136.764	25.5	21	2154
70	116.363	137.14	25.5	21	2185
71	115.159	137.737	25.5	21	2216
72	115.665	137.828	25.5	21	2248
73	115.903	138.521	25.5	21	2279
74	116.228	138.366	25.5	21	2309
75	116.632	137.336	25.5	21	2341
76	116.167	137.571	25.5	21	2371
77	116.6	136.555	25.5	21	2402
78	116.465	136.555	25.5	21	2432
79	115.884	136.962	25.5	21	2464
80	115.249	137.744	25.5	21	2493
81	115.549	137.55	25.5	21	2523
82	115.237	137.236	25.5	21	2553
83	115.394	136.802	25.5	21	2583
84	115.285	136.582	25.5	21	2613
85	115.077	136.648	25.5	21	2644
86	113.39	136.643	25.5	21	2673
87	114.206	135.937	25.5	21	2703
88	114.712	135.819	25.5	21	2733
89	114.518	134.27	25.5	21	2764
[truncated: 2,239 more rows]
