# Supplementary material for: Functional visualization of NK cell-mediated killing of metastatic single tumor cells
Source: eLife journal article supplement (doi:10.7554/elife.76269), 2022-02-03
Supplement: supp [file tumor_5.xlsx]

## Sheet: Sheet1
1	105.069	47.0808	5.5	1	0
2	105.267	46.9256	5.5	1	28
3	105.124	46.9482	5.5	1	55
4	104.206	46.6799	5.5	1	83
5	104.178	46.6244	5.5	1	111
6	104.347	46.6618	5.5	1	139
7	104.483	46.602	5.5	1	167
8	104.536	46.4648	5.5	1	195
9	104.758	46.5304	5.5	1	223
10	105.112	47.1453	5.5	1	250
11	105.261	47.1863	5.5	1	278
12	108.848	47.2007	5.5	1	306
13	105.735	47.4002	5.5	1	334
14	105.847	47.0909	5.5	1	363
15	118.861	36.1972	5.5	1	392
16	118.169	36.4273	5.5	1	421
17	104.913	46.6736	5.5	1	450
18	105.26	46.8996	5.5	1	479
19	110.337	43.7104	5.5	1	508
20	112.833	40.4137	5.5	1	537
21	117.513	36.9123	5.5	1	565
22	116.751	37.2827	5.5	1	592
23	116.959	36.8663	5.5	1	619
24	113.276	39.7064	5.5	1	646
25	110.18	42.6396	5.5	1	673
26	111.46	41.3857	5.5	1	701
27	115.357	38.0639	5.5	1	728
28	117.391	36.4195	5.5	1	755
29	117.568	36.0087	5.5	1	782
30	113.98	38.6753	5.5	1	809
31	112.74	39.6745	5.5	1	834
32	111.699	40.3531	5.5	1	861
33	113.512	39.9811	5.5	1	889
34	115.396	38.7722	5.5	1	916
35	118.636	36.4839	5.5	1	945
37	112.46	42.1955	5.5	1	1000
38	112.216	42.2815	5.5	1	1029
39	111.21	45.3444	5.5	1	1057
40	115.325	40.1191	5.5	1	1086
41	118.74	37.993	5.5	1	1114
43	119.616	36.2236	5.5	1	1169
44	117.499	37.5462	5.5	1	1197
45	115.934	39.2627	5.5	1	1225
46	114.102	40.364	5.5	1	1253
47	115.079	40.4372	5.5	1	1281
49	118.592	36.9298	5.5	1	1338
50	116.783	38.1649	5.5	1	1367
51	112.927	41.2744	5.5	1	1395
52	106.236	46.9294	5.5	1	1424
53	105.648	46.3621	5.5	1	1451
54	116.491	37.7524	5.5	1	1479
55	118.593	35.8062	5.5	1	1504
56	119.23	35.9621	5.5	1	1532
57	116.21	37.972	5.5	1	1560
58	113.185	40.2905	5.5	1	1588
59	110.546	43.8246	5.5	1	1616
60	113.288	39.7915	5.5	1	1644
61	118.458	35.8403	5.5	1	1672
62	118.131	35.8276	5.5	1	1700
63	117.486	36.3209	5.5	1	1728
64	114.101	38.4916	5.5	1	1757
65	111.994	40.4057	5.5	1	1786
66	112.046	40.9123	5.5	1	1815
67	117.137	36.9946	5.5	1	1843
69	118.696	35.1152	5.5	1	1897
71	114.809	38.1435	5.5	1	1952
72	112.292	40.3337	5.5	1	1981
73	113.728	39.474	5.5	1	2009
1	205.037	71.3574	5.5	2	1
2	201.672	69.7483	9.07885	2	30
3	205.812	70.2989	5.5	2	56
4	205.511	70.624	5.5	2	84
5	202.281	68.7893	9.22357	2	113
6	204.097	70.4095	7.59455	2	141
7	205.45	70.7753	5.5	2	168
8	205.807	70.1616	5.5	2	196
9	205.715	69.6937	5.5	2	224
10	205.06	69.4304	5.5	2	251
11	205.491	68.873	5.5	2	279
12	205.44	68.229	5.5	2	307
13	205.405	67.653	5.5	2	335
14	205.628	67.8237	5.5	2	364
15	205.774	67.2057	5.5	2	393
16	204.929	65.8666	5.5	2	422
17	205.06	66.5533	5.5	2	451
18	205.207	66.7474	5.5	2	480
19	205.074	67.1803	5.5	2	509
20	204.73	66.487	5.5	2	538
21	204.495	65.9665	5.5	2	566
22	204.8	66.3096	5.5	2	593
23	204.73	65.4675	5.5	2	620
24	204.698	65.1753	5.5	2	647
25	204.464	64.9287	5.5	2	674
26	204.021	64.3666	5.5	2	702
27	204.381	64.5278	5.5	2	729
28	204.311	64.4199	5.5	2	756
29	204.218	63.2698	5.5	2	783
30	204.56	63.4846	5.5	2	810
31	204.839	63.4174	5.5	2	835
32	203.697	62.0765	6.58221	2	862
33	204.165	62.1564	7.0146	2	890
34	204.202	61.1056	6.85204	2	917
35	204.318	61.3677	7.1894	2	946
36	204.463	61.6027	7.47073	2	972
37	204.675	61.1762	7.46278	2	1001
38	204.888	61.3363	7.82732	2	1030
39	205.388	61.0601	7.25388	2	1058
40	205.419	60.4408	6.69705	2	1087
41	205.418	61.6999	7.54135	2	1115
42	205.22	61.8963	7.49349	2	1142
43	205.401	61.5563	7.04903	2	1170
44	205.16	61.707	7.48101	2	1198
45	204.586	59.5791	7.68367	2	1227
46	204.417	59.004	7.07018	2	1255
47	203.982	58.0153	7.62319	2	1283
48	205.146	60.2303	6.33878	2	1310
49	204.724	58.5065	7.23667	2	1340
50	204.618	58.4074	7.90672	2	1369
51	204.053	57.9147	8.17864	2	1397
52	204.761	57.4761	7.41777	2	1426
53	204.692	57.5088	7.22551	2	1453
54	205.035	58.8815	6.60019	2	1480
55	204.707	56.9262	7.10624	2	1506
56	205.544	59.1875	5.5	2	1533
57	204.574	57.2987	8.03124	2	1562
58	204.631	57.5286	7.7575	2	1590
59	204.088	56.6448	7.52895	2	1618
60	204.284	57.9563	5.5	2	1645
61	203.849	56.9609	7.40993	2	1674
62	203.893	56.4645	7.99301	2	1702
63	204.332	56.8366	7.68056	2	1730
64	202.819	56.6987	9.69592	2	1760
65	203.909	60.5053	7.43851	2	1787
66	203.876	60.4782	7.53798	2	1816
67	203.914	60.7876	7.63295	2	1844
68	202.959	59.1501	8.71191	2	1872
69	202.37	57.9438	10.2488	2	1899
70	203.4	57.9433	10.322	2	1926
71	202.808	57.2577	10.0865	2	1954
72	203.016	57.8442	10.3014	2	1983
73	202.963	57.8188	11.0227	2	2011
74	203	58.6291	10.5595	2	2040
75	203.478	57.8935	10.4288	2	2069
76	203.934	57.8948	10.8392	2	2098
77	203.971	58.1543	11.9428	2	2128
78	204.048	58.6861	12.4177	2	2157
79	204.437	58.5737	12.059	2	2186
80	206.007	58.9129	11.2761	2	2213
81	205.588	58.7612	11.9342	2	2242
82	205.201	58.7767	12.6751	2	2270
83	205.629	58.9888	12.4274	2	2297
84	205.448	59.3815	12.7164	2	2325
85	206.009	58.4618	12.5288	2	2352
86	205.562	58.4779	12.4631	2	2380
87	205.275	59.2925	12.4662	2	2407
88	205.215	59.1533	12.4979	2	2434
89	205.424	58.5935	12.5334	2	2462
90	205.125	59.1955	12.7244	2	2489
91	205.001	59.5923	12.8778	2	2517
92	204.825	58.9658	12.1487	2	2545
93	204.818	58.2487	12.5303	2	2573
94	205.212	58.8408	12.3202	2	2601
95	205.611	58.7307	10.9996	2	2627
96	204.616	58.4483	12.511	2	2656
97	204.38	58.5598	12.8853	2	2684
98	204.325	58.5783	13.2738	2	2712
99	204.375	58.3504	13.3092	2	2739
100	204.569	58.6167	13.0615	2	2768
101	204.489	58.2325	12.8946	2	2795
102	204.937	57.7776	13.0511	2	2823
103	205.466	58.0027	12.8938	2	2851
104	206.277	57.6488	12.9634	2	2877
105	205.603	57.0371	12.8491	2	2903
106	204.857	57.2623	12.9143	2	2927
107	204.989	57.1162	12.8103	2	2953
108	205.332	56.9645	12.5464	2	2979
109	204.909	57.9032	13.212	2	3007
110	204.737	57.9656	13.6437	2	3033
111	205.659	57.7746	13.5154	2	3060
112	205.861	58.2432	13.852	2	3084
113	205.904	58.5911	13.7984	2	3110
114	206.454	58.9828	13.5559	2	3135
115	206.945	58.9081	13.4583	2	3159
116	207.324	58.8259	12.9129	2	3185
117	207.117	59.0331	13.7453	2	3208
118	207.2	59.1103	13.8818	2	3233
119	207.439	58.8245	13.8357	2	3258
120	207.142	59.5061	13.6048	2	3282
121	207.566	60.0791	13.7244	2	3306
122	207.616	59.6993	13.2857	2	3331
123	207.46	59.8764	13.659	2	3357
124	207.056	60.2396	13.7837	2	3383
125	207.32	60.0451	14.3267	2	3420
126	207.521	59.783	12.9748	2	3435
127	207.116	60.0837	12.9551	2	3461
128	207.02	59.9029	13.0199	2	3486
129	207.063	59.5774	13.1563	2	3512
130	207.135	59.6159	13.5566	2	3537
131	206.759	59.6705	13.7303	2	3562
132	206.141	59.6282	14.1901	2	3587
133	206.297	59.8696	13.9815	2	3609
134	206.243	59.5221	13.6766	2	3633
135	206.246	59.6055	13.7568	2	3656
136	206.089	59.5225	13.784	2	3680
137	206.253	59.5301	13.8935	2	3703
138	206.513	59.2382	13.5856	2	3725
139	206.506	59.1108	13.9534	2	3746
140	206.02	59.5905	13.5015	2	3768
141	206.145	59.1502	13.4364	2	3789
142	206.31	58.6762	13.3216	2	3811
143	206.356	58.6718	13.387	2	3833
144	206.129	59.125	13.9901	2	3855
145	205.839	58.9017	14.4349	2	3886
146	205.625	58.5578	14.2792	2	3909
147	205.429	59.1575	13.6417	2	3924
148	205.238	59.2376	14.0048	2	3945
149	205.384	59.3631	13.9537	2	3966
150	205.655	59.22	14.1194	2	3987
151	205.454	59.1723	14.4691	2	4017
152	205.836	59.024	14.82	2	4038
153	205.513	59.5386	14.6983	2	4059
154	205.817	59.7647	14.4951	2	4079
155	206.095	59.8134	14.3652	2	4101
156	206.301	60.0673	14.4571	2	4120
157	206.463	60.3579	14.5866	2	4139
158	206.755	60.4713	14.9506	2	4159
159	206.634	60.5514	14.5434	2	4178
160	207.002	60.374	14.4367	2	4198
161	207.013	60.4134	14.6869	2	4217
162	206.73	60.6229	14.4321	2	4238
163	207.384	60.822	14.0971	2	4251
164	207.477	60.1933	14.2745	2	4278
165	207.457	60.4661	14.2132	2	4291
166	206.898	60.335	14.3967	2	4318
167	206.963	60.4171	14.248	2	4331
168	206.866	60.4836	13.8196	2	4351
169	207.158	60.2123	13.8427	2	4370
170	207.459	59.8837	14.3049	2	4397
171	207.342	59.9656	14.25	2	4410
172	207.57	59.4194	13.9219	2	4428
173	207.379	59.3654	13.9813	2	4446
174	207.508	59.4988	13.3731	2	4464
175	207.323	59.7249	13.5362	2	4481
176	207.289	60.1788	13.6697	2	4497
177	207.24	59.8768	14.1323	2	4514
1	224.098	144.873	5.5	3	2
2	225.073	144.426	5.5	3	29
3	225.777	144.594	5.5	3	57
4	224.268	145.152	5.5	3	85
5	224.374	144.822	5.5	3	112
6	224.66	144.562	5.5	3	140
7	224.357	144.682	5.5	3	169
8	225.011	144.776	5.5	3	197
9	225.552	144.758	5.5	3	225
10	224.061	145.046	5.5	3	252
11	222.946	144.936	5.5	3	280
12	222.468	144.385	5.5	3	308
13	223.141	144.269	5.5	3	336
14	223.114	144.129	5.5	3	365
15	223.874	143.753	5.5	3	394
16	225.199	144.031	5.5	3	423
17	223.459	144.519	5.5	3	452
18	222.955	143.977	5.5	3	481
19	223.069	143.615	5.5	3	510
20	223.703	143.356	5.5	3	539
21	224.185	143.276	5.5	3	567
22	223.935	142.766	5.5	3	594
23	224.514	143.087	5.5	3	621
24	222.663	144.003	5.5	3	648
25	222.367	143.424	5.5	3	675
26	223.459	143.254	5.5	3	703
27	222.756	143.232	5.5	3	730
28	223.342	143.069	5.5	3	757
29	224.56	142.985	5.5	3	784
30	222.761	143.767	5.5	3	811
31	219.447	149.125	5.5	3	836
32	219.286	148.439	5.5	3	863
33	219.561	149.732	5.5	3	891
34	222.417	144.297	5.5	3	918
35	222.349	143.997	5.5	3	947
36	224.586	146.083	6.95578	3	973
37	219.906	150.736	5.5	3	1002
38	219.236	150.707	5.5	3	1031
39	219.678	150.381	5.5	3	1059
40	220.088	150.359	5.5	3	1088
41	220.614	150.61	5.5	3	1116
42	221.534	150.203	5.5	3	1143
43	221.517	150.71	5.5	3	1171
44	219.682	150.949	5.5	3	1199
45	219.396	146.999	5.5	3	1226
46	221.044	145.391	5.5	3	1254
47	221.458	144.864	5.5	3	1282
48	222.232	144.919	5.5	3	1311
49	223.312	144.562	5.5	3	1339
50	222.209	144.271	5.5	3	1368
51	220.062	148.933	5.5	3	1396
52	219.358	148.886	5.5	3	1425
53	219.556	148.62	5.5	3	1452
54	222.017	144.188	5.5	3	1481
55	221.726	144.624	5.5	3	1505
56	224.034	143.579	5.5	3	1534
57	221.21	147.648	5.5	3	1561
58	219.693	148.302	5.5	3	1589
59	220.171	147.141	5.5	3	1617
60	219.744	147.707	5.5	3	1646
61	222.291	142.351	5.5	3	1673
62	221.935	146.724	5.5	3	1701
63	221.98	146.777	5.5	3	1729
64	220.669	147.056	5.5	3	1758
65	220.416	147.509	5.5	3	1788
66	220.685	146.775	5.5	3	1817
67	220.857	146.911	5.5	3	1845
68	221.854	146.42	5.5	3	1871
69	222.004	147.1	5.5	3	1898
70	221.347	147.239	5.5	3	1925
71	220.892	147.347	5.5	3	1953
72	220.786	147.525	5.5	3	1982
73	220.903	147.664	5.5	3	2010
74	221.695	147.713	5.5	3	2039
75	222.505	147.404	5.5	3	2068
76	223.268	147.718	5.5	3	2097
77	222.34	148.281	5.5	3	2126
78	221.828	148.565	5.5	3	2155
79	221.801	148.718	5.5	3	2184
80	222.503	148.856	5.5	3	2212
81	223.138	148.982	5.5	3	2240
82	223.407	149.262	5.5	3	2268
83	223.847	149.646	5.5	3	2295
84	222.605	153.206	5.5	3	2323
85	221.754	153.943	5.5	3	2350
86	222.658	149.561	5.5	3	2378
87	223.03	149.358	5.5	3	2405
88	223.272	149.704	5.5	3	2432
89	223.516	152.251	5.5	3	2460
90	223.35	151.41	5.5	3	2487
91	222.951	148.938	5.5	3	2515
92	222.933	148.024	5.5	3	2543
93	222.158	152.504	5.5	3	2571
94	223.553	149.464	5.5	3	2599
95	223.422	150.116	5.5	3	2626
96	223.958	149.862	5.5	3	2654
97	223.31	149.925	5.5	3	2682
98	222.319	150.78	5.5	3	2710
99	222.456	150.551	5.5	3	2738
100	222.538	150.49	5.5	3	2766
101	222.888	149.799	5.5	3	2794
102	223.745	148.769	5.5	3	2821
103	223.774	149.606	5.5	3	2849
104	223.459	148.487	5.5	3	2875
105	222.756	148.755	5.5	3	2901
106	222.721	148.009	5.5	3	2926
107	222.876	147.88	5.5	3	2952
108	223.099	148.172	5.5	3	2978
109	223.674	147.407	5.5	3	3005
110	223.836	147.732	5.5	3	3032
111	223.026	147.68	5.5	3	3059
112	222.987	147.621	5.5	3	3083
113	223.409	147.237	5.5	3	3109
114	223.511	147.704	5.5	3	3134
115	224.033	148.236	5.5	3	3158
116	224.743	148.41	5.5	3	3183
117	224.48	148.612	5.5	3	3207
118	223.947	149.319	5.5	3	3232
119	223.728	149.753	5.5	3	3257
120	224.348	149.129	5.5	3	3281
121	224.597	149.242	5.5	3	3305
122	224.991	149.562	5.5	3	3330
123	225.319	149.362	5.5	3	3356
124	224.551	149.614	5.5	3	3382
125	224.242	149.091	5.5	3	3408
126	223.919	148.913	5.5	3	3434
127	223.96	149.759	5.5	3	3460
128	224.403	148.772	5.5	3	3485
129	224.859	148.702	5.5	3	3510
130	225.46	148.058	5.5	3	3536
131	224.54	148.272	5.5	3	3561
132	224.065	148.214	5.5	3	3586
133	223.746	148.303	5.5	3	3608
134	224.239	148.102	5.5	3	3632
135	224.666	147.654	5.5	3	3655
136	224.851	147.35	5.5	3	3679
137	224.772	147.502	5.5	3	3702
138	224.457	147.915	5.5	3	3724
139	224.097	147.904	5.5	3	3745
140	224.109	147.736	5.5	3	3767
141	224.675	147.183	5.5	3	3787
142	225.031	147.381	5.5	3	3809
143	225.388	147.576	5.5	3	3832
144	224.903	147.975	5.5	3	3853
145	224.125	148.361	5.5	3	3877
146	223.882	147.236	5.5	3	3899
147	224.53	147.64	5.5	3	3922
148	224.005	148.094	5.5	3	3943
149	224.544	147.656	5.5	3	3964
150	225.365	147.603	5.5	3	3985
151	224.458	148.605	5.5	3	4008
152	224.118	148.816	5.5	3	4029
153	224.084	148.799	5.5	3	4050
154	224.396	148.773	5.5	3	4072
155	224.981	148.718	5.5	3	4093
156	225.65	149.218	5.5	3	4113
157	226.524	148.768	5.5	3	4132
158	225.83	149.748	5.5	3	4152
159	225.81	148.641	5.5	3	4171
160	226.289	148.434	5.5	3	4191
161	226.585	148.481	5.5	3	4210
162	227.081	148.796	5.5	3	4230
163	227.487	148.395	5.5	3	4249
164	227.648	148.61	5.5	3	4269
165	226.659	149.2	5.5	3	4289
166	226.219	149.344	5.5	3	4309
167	226.183	148.849	5.5	3	4329
168	226.308	148.235	5.5	3	4349
169	227	148.363	5.5	3	4368
170	227.275	148.331	5.5	3	4388
171	226.813	148.747	5.5	3	4408
172	226.453	148.26	5.5	3	4427
173	226.496	148.13	5.5	3	4444
174	227.217	147.469	5.5	3	4462
175	227.284	147.48	5.5	3	4479
176	227.188	148.082	5.5	3	4496
177	227.785	147.441	5.5	3	4513
1	108.356	250.189	12.2476	4	3
2	108.283	250.215	12.2139	4	31
3	108.477	250.065	12.0442	4	58
4	108.426	250.484	12.0874	4	86
5	108.55	250.158	11.9838	4	114
6	108.153	250.437	11.7362	4	142
7	108.089	250.341	11.7231	4	170
8	107.705	249.83	11.8643	4	198
9	107.756	249.966	12.0382	4	226
10	107.969	249.744	11.6889	4	253
11	107.951	249.745	11.6756	4	281
12	107.511	249.564	11.2401	4	309
13	107.452	249.495	11.4185	4	337
14	107.516	249.342	11.4752	4	366
15	107.613	249.623	11.6685	4	395
16	106.852	249.907	11.6684	4	424
17	106.933	249.351	11.8029	4	453
18	106.68	249.592	11.2299	4	482
19	106.57	249.592	11.229	4	511
20	106.409	249.431	11.4582	4	540
21	106.442	249.431	11.5467	4	568
22	106.407	249.229	11.5536	4	595
23	106.452	249.3	11.5237	4	622
24	106.509	249.369	11.8321	4	649
25	106.364	249.522	11.4165	4	676
26	106.398	249.368	11.4794	4	704
27	106.542	249.267	11.6837	4	731
28	106.624	249.192	11.5704	4	758
29	106.679	249.208	11.7939	4	785
30	106.623	249.407	11.9789	4	812
31	106.51	249.666	12.1315	4	837
32	106.773	249.751	11.9114	4	864
33	106.818	249.826	11.9785	4	892
34	106.918	250.264	12.2529	4	919
35	107.118	250.483	12.2715	4	948
36	107.402	250.832	12.4286	4	974
37	107.339	250.753	12.2459	4	1003
38	107.724	251.134	12.2747	4	1032
39	107.683	251.298	12.0506	4	1060
40	107.91	251.453	11.9816	4	1089
41	108.127	251.307	12.3081	4	1117
42	107.957	251.292	12.4023	4	1144
43	108.048	251.272	12.3697	4	1172
44	108.117	250.949	12.5766	4	1200
45	107.91	250.79	12.2634	4	1228
46	107.475	250.479	12.2529	4	1256
47	107.44	250.352	11.9911	4	1284
48	107.529	249.973	12.5577	4	1312
49	107.382	249.444	12.5869	4	1341
50	107.265	249.431	12.599	4	1370
51	106.402	248.027	12.9835	4	1398
52	106.701	248.513	13.0285	4	1427
53	106.936	248.623	12.9523	4	1454
54	106.885	248.6	12.6718	4	1482
55	106.653	248.438	13.0249	4	1507
56	106.004	247.942	13.4784	4	1535
57	103.423	246.128	13.8917	4	1563
58	101.004	243.738	14.1816	4	1591
59	99.9192	242.429	14.1509	4	1619
60	99.6028	242.068	14.0114	4	1647
61	99.7071	242.592	14.529	4	1690
62	99.1189	243.026	14.4292	4	1718
63	99.2245	243.206	14.5421	4	1747
64	99.6688	243.743	14.5359	4	1776
65	100.216	245.038	14.0519	4	1790
66	101.937	249.149	13.3678	4	1819
67	101.733	249.013	13.1801	4	1847
68	104.661	256.254	13.4367	4	1877
69	105.02	257.651	14.1611	4	1904
70	104.513	257.425	13.9656	4	1931
71	103.797	256.612	14.0352	4	1960
72	104.535	256.978	14.0624	4	1989
73	105.258	258.618	14.4709	4	2030
74	105.676	260.29	14.7874	4	2058
75	107.25	272.001	16.1508	4	2088
76	115.739	279.383	16.8368	4	2118
77	119.158	281.544	17.7346	4	2147
78	121.23	281.934	17.2774	4	2176
79	127.092	281.85	16.4637	4	2202
80	129.809	281.103	16.1612	4	2231
81	132.501	281.529	15.8996	4	2259
82	134.24	281.446	15.4392	4	2287
83	134.544	281.462	15.6805	4	2315
84	138.17	283.601	14.6041	4	2342
85	150.554	297.037	14.9173	4	2370
86	154.211	301.766	13.0932	4	2385
87	160.376	307.314	12.2067	4	2412
88	162.288	312.428	12.2054	4	2439
89	162.439	312.759	12.087	4	2467
90	162.852	312.27	13.9356	4	2494
91	162.62	312.91	13.4949	4	2522
92	163.972	315.154	13.2361	4	2550
93	163.609	317.304	13.549	4	2578
94	163.315	316.609	14.0321	4	2607
95	163.128	316.21	13.8085	4	2634
96	163.168	316.2	14.0591	4	2662
97	163.273	316.18	14.1014	4	2690
98	163.394	317.938	14.3398	4	2730
99	162.5	318.054	14.6387	4	2759
100	162.741	317.723	14.2188	4	2773
101	162.975	317.621	14.1181	4	2801
102	163.318	318.069	14.1905	4	2828
103	163.755	318.777	14.4705	4	2868
104	163.973	319.278	14.3375	4	2894
105	163.383	319.106	14.4859	4	2919
106	163.613	318.928	14.5286	4	2944
107	163.62	318.617	14.3376	4	2971
108	164.105	318.599	14.1336	4	2985
109	164.276	318.239	14.078	4	3012
110	163.562	318.418	14.5048	4	3052
111	164.051	319.062	14.7976	4	3076
112	165.667	319.334	14.9099	4	3102
113	165.6	319.476	15.101	4	3126
114	165.365	319.182	15.6206	4	3150
115	165.829	320.275	15.1201	4	3175
116	165.162	321.112	15.7638	4	3199
117	164.646	320.864	16.3881	4	3224
118	165.411	321.503	16.0665	4	3249
119	164.209	321.222	16.9401	4	3273
120	164.256	321.175	16.8407	4	3298
121	164.836	320.177	16.4247	4	3322
122	166.295	319.011	16.2629	4	3348
123	166.15	319.51	16.3125	4	3374
124	166.025	319.387	16.1106	4	3400
125	165.547	318.889	16.3324	4	3426
126	163.317	313.779	14.3392	4	3452
127	165.049	320.36	11.4733	4	3466
128	173.907	336.416	13.6942	4	3492
1	366.735	217.494	5.5	5	4
2	366.383	217.917	5.5	5	32
3	366.751	218.016	5.5	5	59
4	367.141	218.042	5.5	5	87
5	367.315	217.799	5.5	5	115
6	366.796	217.839	5.5	5	143
7	366.337	217.968	5.5	5	171
8	366.212	217.953	5.5	5	199
9	366.437	217.889	5.5	5	227
10	366.75	217.602	5.5	5	254
11	367.048	217.569	5.5	5	282
12	366.793	217.415	5.5	5	310
13	366.051	217.303	5.5	5	338
14	365.694	217.164	5.5	5	368
15	365.869	217.595	5.5	5	396
16	365.874	217.76	5.5	5	425
17	365.831	217.134	5.5	5	454
18	366.081	217	5.5	5	483
19	365.948	216.953	5.5	5	512
20	365.386	217.029	5.5	5	541
21	365.149	216.847	5.5	5	569
22	365.469	217.163	5.5	5	596
23	365.699	216.842	5.5	5	623
24	366.09	216.821	5.5	5	650
25	365.821	216.678	5.5	5	677
26	365.812	216.737	5.5	5	705
27	365.412	216.686	5.5	5	732
28	365.182	216.904	5.5	5	759
29	365.49	216.921	5.5	5	786
30	365.714	216.712	5.5	5	813
31	365.996	216.848	5.5	5	838
32	365.915	216.953	5.5	5	865
33	365.421	216.654	5.5	5	893
34	365.342	217.012	5.5	5	920
35	366.052	217.523	5.5	5	949
36	365.66	217.058	5.5	5	975
37	366.158	217.002	5.5	5	1004
38	366.84	217.475	5.5	5	1033
39	366.249	217.155	5.5	5	1061
40	366.61	217.819	5.5	5	1090
41	366.326	218.011	5.5	5	1118
42	366.342	217.636	5.5	5	1145
43	366.641	217.603	5.5	5	1173
44	366.403	217.134	7.25807	5	1201
45	367.241	217.791	5.5	5	1229
46	366.509	217.438	5.5	5	1257
47	366.606	217.622	5.5	5	1285
48	366.346	217.749	5.5	5	1313
49	366.284	217.437	5.5	5	1342
50	366.306	216.757	5.5	5	1371
51	366.163	216.509	7.27125	5	1399
52	366.298	216.432	5.5	5	1428
53	366.211	216.568	5.5	5	1455
54	365.654	216.351	5.5	5	1483
55	365.679	216.931	5.5	5	1508
56	365.975	216.456	5.5	5	1536
57	365.999	216.322	5.5	5	1564
58	366.043	216.138	6.84546	5	1592
59	366.107	216.044	5.5	5	1620
60	365.865	216.331	5.5	5	1648
61	365.927	216.453	5.5	5	1675
62	365.902	216.633	5.5	5	1703
63	366.226	216.46	5.5	5	1732
64	366.17	216.195	7.04549	5	1761
65	366.314	216.042	5.5	5	1791
66	366.113	216.314	5.5	5	1820
67	365.799	216.62	5.5	5	1848
68	365.808	216.803	5.5	5	1874
69	365.887	216.529	5.5	5	1901
70	366.038	216.321	5.5	5	1928
71	366.191	215.96	5.5	5	1956
72	366.403	216.228	5.5	5	1985
73	366.499	216.41	5.5	5	2013
74	366.333	216.648	5.5	5	2042
75	366.468	217.009	5.5	5	2071
76	366.671	217.12	6.91379	5	2100
77	367.058	217.187	7.56311	5	2129
78	366.968	216.882	7.91364	5	2158
79	367.269	217.119	7.38099	5	2187
80	367.694	217.541	7.0286	5	2215
81	367.462	217.761	5.5	5	2243
82	367.634	218.153	5.5	5	2271
83	367.637	218.069	7.73155	5	2298
84	368.414	217.782	8.07699	5	2326
85	367.88	217.193	7.69394	5	2353
86	367.82	217.214	8.13504	5	2381
87	367.818	217.531	6.99265	5	2408
88	367.324	217.903	5.5	5	2435
89	367.221	217.75	6.76474	5	2463
90	367.471	217.699	7.35529	5	2490
91	367.56	217.366	7.75961	5	2518
92	367.744	217.334	7.7457	5	2546
93	367.717	217.011	7.97711	5	2574
94	367.807	217.073	8.07826	5	2602
95	367.374	217.284	5.5	5	2629
96	367.087	216.866	7.19696	5	2657
97	367.301	216.934	7.47079	5	2685
98	367.963	216.983	7.48899	5	2713
99	368.051	216.849	8.0395	5	2741
100	367.724	216.991	7.40702	5	2769
101	367.152	217.038	5.5	5	2797
102	366.973	216.853	6.86496	5	2824
103	367.128	217.143	7.58606	5	2852
104	367.512	216.881	7.50549	5	2878
105	367.461	216.764	7.58172	5	2904
106	367.489	216.546	8.22128	5	2929
107	367.24	216.596	7.3663	5	2955
108	366.842	216.748	5.5	5	2981
109	366.727	216.694	7.25345	5	3008
110	366.853	216.814	8.02127	5	3035
111	367.51	216.605	8.59594	5	3062
112	367.073	216.732	8.38372	5	3086
113	367.87	216.562	9.1901	5	3112
114	367.836	216.881	8.77206	5	3137
115	367.431	217.118	7.95559	5	3161
116	367.355	217.154	8.93165	5	3186
117	367.941	217.528	8.89658	5	3210
118	367.908	217.835	9.10328	5	3235
119	368.227	217.828	9.66781	5	3260
120	369.011	218.105	9.42351	5	3284
121	368.661	218.226	8.97063	5	3308
122	368.251	218.234	8.90671	5	3333
123	367.984	218.458	8.7102	5	3359
124	368.092	218.395	8.72856	5	3385
125	368.694	218.201	9.28967	5	3410
126	369.054	217.812	9.7417	5	3437
127	368.278	217.72	9.31114	5	3463
128	367.989	217.641	9.1953	5	3488
129	367.785	217.738	8.85077	5	3513
130	367.79	217.912	8.62675	5	3538
131	367.947	217.758	8.5066	5	3563
133	368.298	217.414	9.38219	5	3610
134	368.424	217.474	9.35454	5	3634
135	367.602	217.356	8.63501	5	3657
136	367.827	217.436	8.96734	5	3681
1	276.18	246.017	11.7867	6	5
2	276.197	246.541	11.7396	6	33
3	276.366	246.205	11.5481	6	60
4	276.228	246.402	11.7182	6	88
5	276.071	246.109	11.3484	6	116
6	275.794	245.878	11.2102	6	144
7	275.932	245.995	11.5815	6	172
8	276.05	246.027	11.4607	6	200
9	275.973	246.499	11.624	6	228
10	275.729	246.173	11.3637	6	255
11	275.754	245.595	11.364	6	283
12	275.181	245.223	10.9255	6	311
13	275.244	244.969	10.9496	6	339
14	275.337	244.934	11.1468	6	369
15	275.54	245.575	11.4779	6	397
16	275.076	246.059	10.9899	6	426
17	275.389	245.504	11.4354	6	455
18	275.314	245.624	11.651	6	484
19	274.908	245.071	11.2822	6	513
20	274.856	244.817	11.3404	6	542
21	275.106	244.953	11.4228	6	570
22	275.148	244.868	11.008	6	597
23	274.728	244.939	11.1235	6	624
24	274.987	244.85	11.5737	6	651
25	274.573	244.564	11.4486	6	678
26	274.547	244.365	11.3032	6	706
27	274.722	244.176	11.2421	6	733
28	274.932	244.537	11.3127	6	760
29	275.168	244.533	11.6528	6	787
30	275.22	244.562	11.7	6	814
31	275.12	244.866	11.7339	6	839
32	275.106	244.648	11.6076	6	866
33	275.34	244.693	11.8307	6	894
34	275.166	244.906	11.8756	6	921
35	275.768	245.085	12.0034	6	950
36	276.098	245.031	11.9346	6	976
37	276.014	245.125	11.8166	6	1005
38	276.055	245.141	11.9077	6	1034
39	275.889	245.134	11.7968	6	1062
40	275.958	245.38	11.8099	6	1091
41	276.341	245.513	11.8366	6	1119
42	276.431	245.897	11.9135	6	1146
43	276.68	245.938	11.9901	6	1174
44	276.597	245.415	11.8689	6	1202
45	276.201	245.648	11.8218	6	1230
46	275.837	245.155	11.6855	6	1258
47	275.935	244.965	11.7518	6	1286
48	276.488	244.848	11.7449	6	1314
49	276.361	244.701	11.7132	6	1343
50	276.284	244.636	11.5476	6	1372
51	276.433	243.945	11.8615	6	1400
52	275.89	244.239	11.4385	6	1429
53	275.687	243.965	11.7241	6	1456
54	275.857	244.413	11.5586	6	1484
55	275.98	244.625	11.5505	6	1509
56	276.268	244.511	11.5166	6	1537
57	276.241	245.003	11.6506	6	1565
58	276.118	244.785	11.8191	6	1593
59	275.904	245.176	11.9507	6	1621
60	275.595	244.306	11.2765	6	1649
61	275.868	244.983	12.0436	6	1676
62	275.514	250.114	13.6364	6	1704
63	277.017	258.526	13.9991	6	1744
64	274.782	268.073	12.455	6	1772
65	271.03	275.83	9.85832	6	1799
66	266.318	276.033	5.5	6	1824
67	266.072	276.788	5.5	6	1852
68	267.921	280.396	5.5	6	1879
69	263.438	297.557	15.4207	6	1920
70	263.727	298.62	15.2066	6	1947
71	263.814	297.75	15.989	6	1977
72	263.58	296.4	16.0504	6	2005
73	264.407	292.758	16.1445	6	2034
74	270.708	289.844	20.1878	6	2062
75	270.704	290.013	20.2044	6	2092
76	271.223	291.33	20.0422	6	2121
77	270.991	291.281	19.9397	6	2150
78	271.294	291.362	20.0846	6	2179
79	271.35	291.725	20.342	6	2206
80	271.47	291.034	20.3231	6	2235
81	271.378	291.218	20.1769	6	2263
82	270.902	291.098	20.6151	6	2291
83	271.25	291.107	20.6102	6	2318
84	271.549	291.137	20.1967	6	2346
85	271.173	290.927	20.2348	6	2374
86	271.626	291.351	20.1318	6	2401
87	271.607	291.427	20.3754	6	2428
88	271.313	291.297	20.6765	6	2455
89	271.389	291.229	20.4735	6	2482
90	270.988	291.197	20.2351	6	2511
91	271.261	291.562	21.3681	6	2539
92	271.462	291.269	20.9069	6	2567
93	271.572	291.485	21.0398	6	2595
94	271.501	291.404	20.9487	6	2623
95	270.996	290.866	21.0641	6	2650
96	271.254	290.349	20.6213	6	2677
97	270.891	290.451	20.7482	6	2705
98	271.096	290.331	20.719	6	2734
99	271.531	290.586	20.9424	6	2762
100	271.201	290.23	20.8977	6	2790
101	270.784	289.966	21.0814	6	2817
102	270.531	289.459	22.4565	6	2844
103	270.86	289.518	21.4685	6	2870
104	270.872	289.411	21.2484	6	2897
105	271.315	289.793	21.1518	6	2922
106	271.19	289.043	21.6781	6	2948
107	271.23	289.5	21.7341	6	2974
108	271.236	289.594	21.5231	6	3001
109	270.717	288.979	22.2348	6	3028
110	270.643	289.013	21.7549	6	3055
111	271.417	289.3	21.0116	6	3080
112	271.678	289.72	21.4786	6	3106
113	271.979	290.548	21.4652	6	3131
114	272.047	290.521	21.6517	6	3155
115	271.569	290.486	21.7381	6	3179
116	271.637	290.102	22.3017	6	3203
117	271.925	290.318	21.5904	6	3228
118	271.548	290.427	21.5202	6	3253
119	272.007	291.033	21.7279	6	3278
120	272.151	291.352	22.8734	6	3302
121	272.064	291.555	23.0455	6	3326
122	272.206	291.848	22.6323	6	3352
123	272.063	291.339	21.2669	6	3378
124	271.798	291.494	21.9933	6	3404
125	271.853	291.146	21.7117	6	3431
126	271.607	291.318	22.2626	6	3456
127	272.06	291.791	22.3621	6	3482
128	271.913	291.66	22.6964	6	3505
129	271.644	291.532	23.1659	6	3531
130	271.2	290.971	22.1582	6	3556
131	270.81	290.589	22.4388	6	3581
132	271.517	290.746	22.736	6	3604
133	271.217	291.022	22.5555	6	3627
134	271.798	291.366	22.557	6	3651
135	271.66	290.482	22.1296	6	3673
136	271.076	290.977	25.5	6	3700
137	271.364	290.694	22.3492	6	3719
138	270.79	290.304	22.5684	6	3741
139	271.287	290.483	21.9147	6	3762
140	271.694	291.786	23.401	6	3783
141	271.105	290.735	22.8898	6	3804
142	271.412	290.539	23.579	6	3826
143	270.44	289.891	22.9079	6	3848
144	270.389	289.815	23.1349	6	3871
145	270.685	290.023	21.9689	6	3894
146	270.737	289.794	22.1118	6	3917
147	270.816	289.923	22.0702	6	3938
148	265.384	290.111	17.1644	6	3958
149	270.809	289.4	20.6654	6	3980
150	267.001	287.748	19.1759	6	4001
151	271.033	289.343	21.7458	6	4023
152	271.421	290.218	22.2614	6	4045
153	267.805	289.052	18.7737	6	4067
154	271.541	290.266	23.8221	6	4087
155	272.289	291.513	24.1575	6	4108
1	226.671	309.804	5.5	7	6
2	226.9	309.572	5.5	7	34
3	226.758	309.942	5.5	7	61
4	226.625	310.583	5.5	7	89
5	226.933	310.01	5.5	7	117
6	226.693	310.301	5.5	7	145
7	226.599	309.714	5.5	7	173
8	226.468	309.55	5.5	7	201
9	226.434	309.284	5.5	7	229
10	226.286	309.371	5.5	7	256
11	226.318	308.979	5.5	7	284
12	226.061	308.856	5.5	7	312
13	226.103	309.202	5.5	7	340
14	226.038	309.304	5.5	7	370
15	226.091	308.74	5.5	7	398
16	225.677	309.4	5.5	7	428
17	225.748	309.517	5.5	7	456
18	225.89	309.087	5.5	7	485
19	225.942	309.428	5.5	7	514
20	225.586	309.202	5.5	7	543
21	225.57	308.639	5.5	7	571
22	225.614	309.011	5.5	7	598
23	225.639	309.024	5.5	7	625
24	225.648	309.303	5.5	7	652
25	225.598	309.402	5.5	7	679
26	225.483	309.424	5.5	7	707
27	225.492	308.838	5.5	7	734
28	225.421	308.411	5.5	7	761
29	225.49	308.193	5.5	7	788
30	225.537	308.381	5.5	7	815
31	225.558	308.648	5.5	7	840
32	225.585	309.196	5.5	7	867
33	225.9	309.424	5.5	7	895
34	225.83	309.52	5.5	7	922
35	226.029	309.49	5.5	7	951
36	226.268	309.194	5.5	7	977
37	226.32	310.029	5.5	7	1006
38	226.47	310.001	5.5	7	1035
39	226.701	310.374	5.5	7	1063
40	226.73	310.272	5.5	7	1092
41	226.813	310.374	5.5	7	1120
42	226.801	310.486	5.5	7	1147
43	226.794	310.877	5.5	7	1175
44	226.702	311.815	5.5	7	1203
45	226.546	311.387	5.5	7	1231
46	226.509	310.735	5.5	7	1259
47	226.542	310.359	5.5	7	1287
48	226.597	310.052	5.5	7	1315
49	226.702	309.574	5.5	7	1344
50	226.494	309.805	5.5	7	1373
51	226.559	309.767	5.5	7	1401
52	226.596	309.455	5.5	7	1430
53	226.319	310.472	5.5	7	1457
54	226.26	309.71	5.5	7	1485
55	226.283	309.601	5.5	7	1510
56	226.398	309.456	5.5	7	1538
57	226.372	309.293	5.5	7	1566
58	226.453	308.725	5.5	7	1594
59	226.187	308.877	5.5	7	1622
60	226.102	308.72	5.5	7	1650
61	226.149	308.388	5.5	7	1677
62	226.144	308.305	5.5	7	1705
63	226.222	308.207	5.5	7	1733
64	226.22	308.068	5.5	7	1762
65	226.064	308.256	5.5	7	1792
66	226.118	308.587	5.5	7	1821
67	226.01	308.508	5.5	7	1849
68	226.01	308.391	5.5	7	1875
69	226.141	308.069	5.5	7	1902
70	226.078	308.504	5.5	7	1929
71	226.029	308.31	5.5	7	1958
72	226.047	308.683	5.5	7	1987
73	226.251	309.428	5.5	7	2015
74	226.364	309.001	5.5	7	2043
75	226.443	309.184	5.5	7	2072
76	226.791	309.184	5.5	7	2101
77	226.871	309.599	5.5	7	2130
78	226.951	310.098	5.5	7	2159
79	227.11	310.451	5.5	7	2188
80	227.219	310.549	5.5	7	2216
81	227.423	310.442	5.5	7	2244
82	227.438	310.844	5.5	7	2272
83	227.479	310.989	5.5	7	2299
84	227.504	311.498	5.5	7	2327
85	227.772	327.338	5.5	7	2354
86	227.658	328.54	5.5	7	2382
87	221.129	336.75	5.5	7	2409
1	197.773	280.048	7.72587	8	7
2	197.77	280.124	7.9934	8	35
3	197.84	280.113	7.32185	8	62
4	197.901	280.462	7.24632	8	90
5	198.05	280.132	7.97635	8	118
6	198.027	279.904	8.09381	8	146
7	197.923	280.158	7.66615	8	174
8	197.654	280.245	7.50038	8	202
9	197.449	280.213	6.87222	8	230
10	197.351	279.994	7.11076	8	257
11	197.525	279.822	7.54151	8	285
12	197.458	279.605	7.51833	8	313
13	197.4	279.559	7.46446	8	341
14	197.326	279.494	7.35851	8	371
15	197.215	279.856	7.54578	8	399
16	196.621	280.205	5.5	8	427
17	196.876	279.595	7.63027	8	457
18	197.142	279.669	7.69293	8	486
19	197.175	279.358	8.20642	8	515
20	197.008	279.695	7.90248	8	544
21	196.991	279.746	7.70149	8	572
22	196.83	279.471	7.50057	8	599
23	196.681	279.436	7.23569	8	626
24	196.901	279.468	7.54045	8	653
25	197.016	279.316	8.06511	8	680
26	197.023	279.093	8.36224	8	708
27	197.012	279.231	8.24029	8	735
28	196.8	279.195	8.1402	8	762
29	196.764	279.223	8.20831	8	789
30	196.762	278.97	8.24774	8	816
31	196.875	279.043	8.34349	8	841
32	197.139	279.091	8.66147	8	868
33	197.401	279.375	9.00489	8	896
34	197.188	279.614	8.77124	8	923
35	197.191	279.666	9.21587	8	952
36	197.315	280.048	8.77684	8	978
37	197.479	279.937	8.5246	8	1007
38	197.89	280.087	9.03442	8	1036
39	198.147	280.217	9.14598	8	1064
40	198.111	280.47	9.05962	8	1093
41	198.23	280.507	9.35565	8	1122
42	198.216	280.948	8.89744	8	1148
43	198.167	280.826	8.83333	8	1176
44	198.213	280.691	8.70922	8	1204
45	198.247	280.372	8.8511	8	1232
46	198.274	280.05	8.82534	8	1260
47	198.337	280.021	8.97995	8	1288
48	198.141	280.072	8.53264	8	1316
49	198.081	280.087	8.41472	8	1345
50	197.98	279.985	8.06786	8	1374
51	198.096	279.975	8.61905	8	1402
52	198.222	279.918	8.71591	8	1431
53	198.16	279.515	9.13472	8	1458
54	198.005	279.113	9.35522	8	1486
55	197.829	279.543	9.15706	8	1511
56	197.929	279.702	8.61938	8	1539
57	197.851	279.672	8.49929	8	1567
58	197.91	279.641	8.52471	8	1595
59	198.009	279.157	8.67486	8	1623
60	198	279.422	8.99999	8	1651
61	197.951	278.951	9.43075	8	1679
62	197.746	278.94	8.67639	8	1706
63	197.738	279.191	8.53674	8	1734
64	197.714	279.051	8.72443	8	1763
65	197.807	279.098	8.64512	8	1793
66	197.808	279.044	9.23629	8	1822
67	197.85	279.042	9.57762	8	1850
68	197.696	278.908	9.25328	8	1876
69	197.589	279.22	9.10931	8	1903
70	197.6	279.162	9.0256	8	1930
71	197.632	279.173	9.17271	8	1959
72	197.844	278.998	9.25811	8	1988
73	198.152	279.062	10.1157	8	2016
74	198.203	279.253	10.1652	8	2044
75	198.279	279.461	9.783	8	2073
76	198.461	279.909	9.55294	8	2102
77	198.53	280.062	9.71119	8	2131
78	198.768	280.109	10.0503	8	2160
79	199.054	280.262	10.3046	8	2189
80	199.207	280.234	10.2913	8	2217
81	199.379	280.437	10.4344	8	2245
82	199.34	280.45	10.139	8	2273
83	199.254	280.715	9.84888	8	2300
84	199.135	280.722	10.2232	8	2328
85	199.177	280.526	10.2025	8	2355
86	199.215	280.347	10.4223	8	2383
87	199.283	280.217	10.3318	8	2410
88	199.315	280.141	10.3705	8	2437
89	199.176	280.416	10.1845	8	2465
90	198.911	280.288	9.94286	8	2492
91	198.904	280.234	9.95074	8	2520
92	198.983	279.946	10.0615	8	2548
93	198.913	279.656	10.2823	8	2576
94	198.92	279.69	10.6054	8	2604
95	198.821	279.714	10.3341	8	2632
96	198.764	279.959	10.0411	8	2660
97	198.804	279.739	10.0108	8	2687
98	198.74	279.515	10.0619	8	2715
99	198.718	279.478	10.2599	8	2743
100	198.902	279.583	10.4756	8	2771
101	198.893	279.64	10.589	8	2799
102	198.718	279.42	10.2937	8	2826
103	198.597	279.506	10.2502	8	2854
104	198.534	279.183	10.2522	8	2880
105	198.566	279.163	10.4231	8	2906
106	198.585	279.12	10.5679	8	2931
107	198.689	278.797	10.8457	8	2957
108	198.704	278.697	10.8103	8	2983
109	198.621	278.957	10.6178	8	3010
110	198.441	278.995	10.4548	8	3037
111	198.651	279.141	10.6021	8	3064
112	198.841	279.152	10.6375	8	3088
113	198.992	279.452	10.7521	8	3114
114	199.231	279.807	10.9142	8	3139
115	199.345	279.649	10.8908	8	3163
116	199.377	280.186	11.112	8	3188
117	199.314	280.18	11.0218	8	3212
118	199.405	280.298	10.6753	8	3237
119	199.546	280.098	11.0955	8	3262
120	199.779	280.31	11.1427	8	3286
121	199.952	280.564	11.2584	8	3310
122	199.997	280.848	11.2122	8	3335
123	199.892	280.835	11.1851	8	3361
124	199.716	280.837	11.0596	8	3387
125	199.608	280.798	10.9783	8	3412
126	199.688	280.232	11.0858	8	3439
127	199.614	280.33	11.0704	8	3465
128	199.688	280.289	10.9482	8	3490
129	199.652	280.192	11.1858	8	3515
130	199.404	279.982	10.9885	8	3540
131	199.254	280.15	10.9715	8	3565
132	199.223	280.214	10.9127	8	3588
133	199.281	280.222	10.9705	8	3611
134	199.328	280.05	11.1082	8	3635
135	199.388	280.062	11.0771	8	3658
136	199.276	280.176	11.15	8	3682
137	199.066	280.143	10.9642	8	3704
138	199.034	280.19	10.8563	8	3726
139	199.039	280.095	11.1153	8	3748
140	199.075	280.227	11.113	8	3770
141	199.259	280.153	11.4163	8	3791
142	199.285	280.071	11.4355	8	3813
143	199.009	279.891	11.3458	8	3835
144	198.854	279.768	11.4968	8	3857
145	198.794	279.909	11.0676	8	3879
146	198.731	279.578	11.2755	8	3902
147	198.825	279.281	11.3507	8	3926
148	198.915	279.369	11.2783	8	3947
149	198.891	279.211	11.4593	8	3968
150	198.892	279.578	11.646	8	3989
151	198.99	279.788	11.7447	8	4011
152	199.045	279.873	11.5877	8	4031
153	199.284	279.976	11.6755	8	4053
154	199.473	279.975	11.9004	8	4075
155	199.709	280.123	12.2681	8	4097
156	199.924	280.491	12.242	8	4116
157	199.892	280.675	12.0607	8	4135
158	200.032	281.092	11.728	8	4155
159	200.163	280.928	12.1287	8	4174
160	200.372	281.079	12.1502	8	4194
161	200.227	280.947	11.7755	8	4213
162	200.505	281.195	12.2654	8	4233
163	200.555	281.111	12.0111	8	4253
164	200.413	281.255	11.7194	8	4272
165	200.349	281.108	11.7996	8	4293
166	200.417	281.147	11.5009	8	4312
167	200.345	281.125	11.5599	8	4333
168	200.426	281.088	11.6051	8	4353
169	200.289	281.06	11.5207	8	4372
170	200.236	281.038	11.7024	8	4391
171	200.046	280.84	11.7254	8	4412
172	199.911	280.706	11.6317	8	4430
173	199.986	280.519	11.4305	8	4448
174	200.029	280.427	11.4619	8	4466
175	200.037	280.63	11.7076	8	4483
176	199.99	280.405	11.5313	8	4500
177	199.903	279.886	11.7892	8	4517
1	136.402	261.936	11.0727	9	8
2	136.597	262.309	10.959	9	36
3	137.317	262.359	10.923	9	63
4	137.593	262.47	11.1096	9	91
5	137.469	262.037	11.2109	9	119
6	137.538	262.061	11.0853	9	147
7	137.478	261.831	10.9942	9	175
8	137.258	261.76	10.9465	9	203
9	136.874	262.105	10.8327	9	231
10	136.545	261.161	10.3572	9	258
11	136.321	261.392	10.3764	9	286
12	134.895	261.502	10.0173	9	314
13	135.446	261.563	10.2193	9	342
14	135.64	261.538	10.4334	9	372
15	135.833	261.604	10.6007	9	400
16	133.6	261.598	9.6245	9	429
17	133.779	261.104	10.0899	9	458
18	135.216	260.857	10.6796	9	487
19	135.859	260.408	10.9682	9	516
20	136.329	260.255	10.912	9	545
21	136.317	260.03	10.9454	9	573
22	136.747	260.139	11.2094	9	600
23	136.287	260.321	10.7918	9	627
24	136.248	260.527	11.0009	9	654
25	136.145	260.722	10.881	9	681
26	136.012	260.435	10.7646	9	709
27	135.888	260.322	10.8997	9	736
28	136.326	260.397	10.8358	9	763
29	136.886	259.99	11.1702	9	790
30	136.116	259.816	10.9755	9	817
31	136.175	260.088	11.0807	9	842
32	135.546	260.45	10.9998	9	869
33	135.373	260.685	10.9967	9	897
34	135.942	260.422	11.5	9	924
35	136.174	260.424	11.6078	9	953
36	136.537	260.593	11.5253	9	979
37	136.474	260.43	11.3878	9	1008
38	138.642	260.504	12.0255	9	1037
39	136.441	260.99	11.4567	9	1065
40	136.531	261.169	11.2793	9	1094
41	136.916	261.059	11.6005	9	1121
42	139.4	260.863	11.8555	9	1149
43	139.454	260.746	11.8682	9	1177
44	138.867	260.64	11.7977	9	1205
45	139.855	260.919	12.0831	9	1233
46	137.262	260.856	11.353	9	1261
47	137.543	260.759	11.3447	9	1289
48	137.771	260.826	11.4897	9	1317
49	137.157	260.8	11.2467	9	1346
50	136.878	261.199	10.9652	9	1375
51	137.026	260.56	11.3745	9	1403
52	139.095	260.312	12.0228	9	1432
53	138.501	259.904	11.8566	9	1459
54	138.99	259.555	11.9295	9	1487
55	137.253	259.645	11.6261	9	1512
56	139.19	260.066	11.8711	9	1540
57	137.13	260.031	11.5093	9	1568
58	139.604	259.714	11.9824	9	1596
59	137.256	259.797	11.5451	9	1624
60	137.16	260.019	11.2559	9	1652
61	136.438	259.725	11.1625	9	1678
62	136.631	260.063	11.2092	9	1707
63	136.521	259.705	11.1125	9	1735
64	136.732	259.291	11.4923	9	1764
65	139.616	258.864	12.0563	9	1794
66	138.92	259.439	12.0294	9	1823
67	138.444	259.15	11.8457	9	1851
68	138.707	259.256	11.9985	9	1878
69	139.239	259.298	12.2119	9	1905
70	138.687	259.475	11.9799	9	1932
71	138.884	259.225	12.2712	9	1961
72	138.969	259.18	12.4832	9	1990
73	138.617	259.44	12.4698	9	2017
74	139.376	259.332	12.5812	9	2045
75	139.142	259.573	12.5533	9	2074
76	140.275	259.801	12.4833	9	2103
77	140.52	260.175	12.5477	9	2132
78	140.333	260.007	12.6836	9	2161
79	139.724	260.135	12.7078	9	2190
80	140.361	260.286	12.7391	9	2218
81	139.845	260.253	12.6927	9	2246
82	140.069	260.417	12.6769	9	2274
83	140.798	260.323	12.6515	9	2301
84	140.461	260.345	12.7153	9	2329
85	140.593	259.916	12.8961	9	2356
86	139.996	259.876	12.7213	9	2384
87	139.764	260.423	12.5807	9	2411
88	139.775	260.635	12.6271	9	2438
89	139.58	260.64	12.3142	9	2466
90	140.315	260.635	12.3123	9	2493
91	139.547	260.756	12.2816	9	2521
92	139.758	260.286	12.5695	9	2549
93	139.949	259.621	12.795	9	2577
94	139.137	259.744	12.772	9	2606
95	139.097	259.554	12.6551	9	2633
96	139.883	259.031	12.8124	9	2661
97	140.349	259.041	12.7183	9	2689
98	139.552	259.066	12.6729	9	2717
99	139.021	259.205	12.8205	9	2745
100	139.151	259.12	12.7867	9	2772
101	138.94	258.915	12.8825	9	2800
102	139.475	259.077	12.8751	9	2827
103	139.602	258.987	12.9021	9	2855
104	139.934	259.057	12.9354	9	2881
105	139.053	258.885	13.0134	9	2907
106	139.52	258.748	13.0479	9	2932
107	139.313	258.605	13.1452	9	2958
108	139.263	258.576	13.0708	9	2984
109	139.377	258.753	12.9991	9	3011
110	139.788	258.626	13.1142	9	3038
111	140.018	258.634	13.3055	9	3065
112	140.098	258.746	13.3083	9	3090
113	139.543	259.075	13.256	9	3116
114	139.819	259.276	13.5467	9	3140
115	139.559	259.446	13.474	9	3164
116	139.188	259.289	13.6037	9	3189
117	140.035	259.514	13.6225	9	3213
118	139.7	259.959	13.45	9	3238
119	139.332	260.327	13.745	9	3263
120	139.766	260.156	13.8889	9	3287
121	139.909	260.48	13.7034	9	3311
122	139.851	260.833	13.5973	9	3336
123	139.846	260.668	13.4491	9	3362
124	140.219	260.553	13.4334	9	3388
125	140.332	260.346	13.457	9	3413
126	139.891	260.171	13.477	9	3440
127	139.786	260.246	13.4622	9	3467
128	139.843	260.108	13.4119	9	3491
129	139.902	260.168	13.3761	9	3516
130	140.26	260.273	13.3299	9	3541
131	140.729	259.924	13.4341	9	3566
132	140.175	259.853	13.3538	9	3589
133	139.692	259.729	13.4895	9	3612
134	139.768	259.684	13.5444	9	3636
135	139.922	259.345	13.4691	9	3659
136	139.472	259.442	13.5413	9	3683
137	140.139	259.592	13.6066	9	3705
138	140.696	259.433	13.5851	9	3727
139	140.803	259.525	13.6351	9	3749
140	139.709	259.471	13.6417	9	3771
141	139.691	259.348	13.6466	9	3792
142	140.173	258.937	13.6414	9	3814
143	139.973	259.481	13.5484	9	3836
144	140.098	259.544	13.7397	9	3858
145	140.57	258.88	13.6801	9	3880
146	140.241	259.058	13.5992	9	3903
147	139.559	259.003	13.685	9	3927
148	139.13	258.974	13.6843	9	3948
149	139.321	258.884	13.7765	9	3969
150	139.719	258.999	13.7706	9	3990
151	140.059	259.349	13.988	9	4012
152	139.915	259.5	13.9408	9	4032
153	140.182	259.6	14.1001	9	4054
154	140.955	259.503	14.4112	9	4082
155	140.157	260.021	14.1514	9	4096
156	141.174	259.995	14.413	9	4123
157	141.51	260.024	14.3399	9	4142
158	142.041	260.199	14.3438	9	4162
159	141.488	260.502	14.3643	9	4181
160	141.681	260.305	14.6466	9	4201
161	141.854	260.297	14.5911	9	4220
162	142.049	260.319	14.6209	9	4241
163	142.31	260.374	14.3446	9	4260
164	141.778	260.614	14.2397	9	4273
165	143.014	260.34	14.4057	9	4300
166	141.648	260.165	14.1228	9	4313
167	141.063	260.312	14.1254	9	4334
168	140.754	260.549	13.9908	9	4354
169	140.725	260.162	13.9342	9	4373
170	141.219	260.16	14.0159	9	4392
171	140.988	260.126	13.8378	9	4413
172	140.634	260.1	13.8271	9	4431
173	140.635	259.893	14.0165	9	4449
174	140.621	259.706	14.0655	9	4467
175	140.582	259.495	13.8539	9	4484
176	140.603	259.461	13.9626	9	4501
177	141.945	259.684	14.3221	9	4523
1	73.0649	300.535	13.9268	10	9
2	73.442	300.604	13.5969	10	37
3	73.2205	300.712	13.506	10	64
4	73.1972	301.165	13.9257	10	92
5	73.5739	300.45	13.3465	10	120
6	73.5648	300.463	13.3109	10	148
7	73.4073	300.437	13.2731	10	176
8	73.2521	300.351	13.3212	10	204
9	72.3624	301.741	13.2461	10	232
10	72.5868	300.334	13.102	10	259
11	72.8397	300.136	13.2407	10	287
12	72.8091	299.88	12.9784	10	315
13	72.9441	299.254	13.0712	10	343
14	72.8637	299.567	13.4415	10	373
15	72.6164	300.071	13.2787	10	401
16	71.5573	300.376	13.2845	10	430
17	72.1375	299.705	13.5434	10	459
18	72.4726	299.621	13.3653	10	488
19	72.392	299.443	13.1275	10	517
20	72.357	299.066	13.3486	10	546
21	72.3912	298.721	13.4489	10	574
22	72.4222	298.71	13.3017	10	601
23	72.332	299.062	13.3956	10	628
24	72.3696	298.848	13.6483	10	655
25	72.2536	299.115	13.2241	10	682
26	72.471	298.621	13.04	10	710
27	72.5156	298.541	13.2897	10	737
28	72.6941	297.807	13.4988	10	764
29	72.6827	297.852	13.5554	10	791
30	72.5829	298.441	13.6333	10	818
31	72.8815	298.315	13.529	10	843
32	73.1306	297.899	13.8969	10	870
33	73.4312	298.096	13.8453	10	898
34	72.8572	298.843	13.5963	10	925
35	73.1699	298.698	13.904	10	954
36	73.0011	299.216	13.8053	10	980
37	73.3162	298.996	14.0819	10	1009
38	73.5664	299.615	14.2732	10	1049
39	74.0011	299.44	14.2801	10	1077
40	74.2632	299.048	14.1909	10	1095
41	74.0598	299.821	14.2271	10	1123
42	73.9441	300.228	13.7045	10	1150
43	73.9283	300.056	13.9916	10	1178
44	73.9084	299.538	14.2053	10	1206
45	74.1637	299.306	13.9724	10	1234
46	74.2328	298.961	13.6717	10	1262
47	74.2093	298.897	14.1167	10	1290
48	74.0912	298.723	14.3243	10	1329
49	74.1347	298.583	13.6957	10	1347
50	74.1105	299.099	13.7454	10	1376
51	74.1794	298.947	13.7781	10	1404
53	73.9772	298.099	14.2082	10	1460
54	73.0868	297.899	14.4131	10	1497
55	71.7728	297.501	15.3937	10	1523
56	72.4566	297.432	15.2425	10	1552
57	72.0652	297.353	15.7194	10	1579
58	73.3287	298.839	13.762	10	1597
59	73.5169	298.175	13.7735	10	1625
60	73.7113	297.387	13.7229	10	1653
61	73.3773	297.539	14.1778	10	1680
62	73.5221	297.422	14.1769	10	1708
63	73.4573	297.071	14.1405	10	1736
64	73.3729	296.93	14.2905	10	1778
65	73.5764	297.074	14.306	10	1807
66	73.6902	297.036	14.4635	10	1836
67	73.5304	297.099	14.2851	10	1864
68	73.4482	297.388	14.5215	10	1889
69	73.2905	297.274	14.2807	10	1917
70	73.5138	297.688	14.1799	10	1933
71	73.5505	297.56	14.4729	10	1974
73	74.1482	297.349	15.0489	10	2031
74	74.0317	297.571	14.9607	10	2059
75	73.7414	298.228	15.085	10	2089
76	73.5288	298.838	15.0694	10	2117
77	73.8704	299.154	14.9531	10	2146
78	73.9176	299.748	15.1888	10	2175
79	74.4442	299.39	15.2085	10	2203
80	75.0289	299.123	15.0675	10	2232
81	74.7536	299.543	15.2407	10	2260
82	75.1065	298.778	15.12	10	2288
83	74.9582	298.793	14.8239	10	2316
84	74.7112	299.961	15.0892	10	2343
85	74.4744	299.591	15.1292	10	2371
86	75.1179	298.686	15.167	10	2398
87	75.187	298.932	15.065	10	2425
88	75.0252	298.358	14.9446	10	2452
89	74.7659	298.144	14.7244	10	2478
90	74.6071	298.301	14.6775	10	2506
91	74.4961	298.685	14.6645	10	2534
92	74.476	299.071	14.8507	10	2563
93	74.2234	299.403	15.0508	10	2591
94	74.4956	298.457	15.1125	10	2619
95	74.4509	297.608	14.9192	10	2646
96	74.0527	298.268	15.3295	10	2674
97	74.3183	298.337	14.8178	10	2702
98	74.3312	298.245	15.1136	10	2729
99	74.3319	298	15.352	10	2758
100	74.3943	297.768	14.9721	10	2787
101	74.2943	297.119	15.2899	10	2813
102	74.3801	297.304	15.0895	10	2842
103	74.24	297.993	15.1667	10	2867
104	73.9811	298.215	14.9816	10	2893
105	74.1295	298.293	15.4095	10	2918
106	73.9589	297.984	15.4103	10	2943
107	74.0278	298.512	15.3179	10	2970
108	73.8207	298.664	15.339	10	2998
109	73.677	298.666	15.1431	10	3025
110	74.4863	297.932	15.3243	10	3051
111	74.4351	298.296	15.5642	10	3075
112	74.8107	297.957	15.8284	10	3101
113	75.086	298.473	15.6943	10	3125
114	75.0683	298.423	15.5705	10	3149
115	74.6286	298.558	15.861	10	3174
116	74.5003	298.966	16.0161	10	3198
117	74.8031	298.638	15.6521	10	3223
118	75.092	298.973	15.708	10	3248
119	75.3426	299.242	16.1452	10	3272
120	75.4011	299.525	15.6902	10	3297
121	75.8691	299.181	15.4973	10	3321
122	75.516	299.38	15.8829	10	3347
123	75.3966	299.075	15.9392	10	3373
124	75.2629	299.536	15.47	10	3399
125	75.2292	299.424	15.7587	10	3425
126	75.4854	298.516	15.8371	10	3451
127	75.6552	298.642	15.9204	10	3477
128	75.6203	298.651	15.871	10	3501
129	75.423	298.494	15.6679	10	3526
130	75.2592	298.546	15.7799	10	3551
131	75.2388	298.245	15.4864	10	3576
132	75.1574	298.171	15.7715	10	3598
133	74.9371	298.189	15.9819	10	3623
134	75.1499	298.795	15.6991	10	3646
135	74.9956	298.782	15.9782	10	3669
136	74.6893	297.969	16.0269	10	3692
137	74.5484	298.428	15.6472	10	3714
138	74.7615	298.292	15.6803	10	3736
139	75.0132	298.142	15.8483	10	3756
140	75.0275	298.354	15.906	10	3778
141	74.6432	297.466	15.9214	10	3799
142	74.8264	296.62	16.1627	10	3821
143	74.573	297.63	16.0947	10	3843
144	74.5942	297.493	15.835	10	3866
145	74.4861	297.598	16.0907	10	3889
146	74.634	297.936	15.8938	10	3912
147	74.4992	297.881	16.0698	10	3933
148	74.7047	297.548	16.0811	10	3955
149	74.7147	297.889	15.8852	10	3976
150	74.4659	297.959	16.0759	10	3997
151	74.6696	298.279	16.2572	10	4020
152	74.8159	298.698	16.3507	10	4041
153	75.3598	298.551	16.1802	10	4062
154	75.4727	298.599	16.16	10	4083
155	75.4596	298.71	16.205	10	4104
156	75.7422	298.574	16.6434	10	4124
157	75.7016	299.216	16.2225	10	4143
158	75.7237	299.318	16.4022	10	4163
159	75.8823	299.604	16.4173	10	4182
160	75.8367	300.366	16.6042	10	4202
161	76.1993	300.087	16.4811	10	4221
162	76.4601	299.551	16.3668	10	4242
163	76.1634	300.007	16.2928	10	4261
164	76.0237	299.712	16.4672	10	4281
165	76.1491	300.115	16.1902	10	4301
166	76.0888	299.084	16.5259	10	4321
167	76.3506	299.134	16.166	10	4341
168	76.1454	298.779	16.1008	10	4360
169	76.037	298.75	16.2153	10	4380
170	76.1308	298.391	16.2953	10	4400
171	75.9781	298.276	16.2387	10	4420
172	75.8178	298.956	16.3873	10	4437
173	75.6283	298.796	16.4458	10	4455
174	75.8359	298.569	16.341	10	4473
175	75.5945	298.692	16.0293	10	4490
176	75.7327	298.361	16.4595	10	4507
177	75.6871	298.479	16.3306	10	4524
1	257.825	287.887	5.5	11	10
2	257.986	287.786	5.5	11	38
3	257.289	287.136	5.5	11	65
4	258.342	288.072	5.5	11	93
5	257.968	287.49	5.5	11	121
6	257.339	286.448	5.5	11	149
7	258.133	287.991	5.5	11	177
8	258.701	288.344	5.5	11	205
9	258.409	288.208	5.5	11	233
10	255.565	301.462	5.5	11	260
11	255.829	299.193	5.5	11	288
12	255.518	301.171	5.5	11	316
13	255.678	301.109	5.5	11	344
14	255.678	300.626	5.5	11	374
15	257.567	307.72	5.5	11	402
16	257.61	308.834	5.5	11	431
17	257.422	309.081	5.5	11	460
18	257.388	307.816	5.5	11	489
19	257.517	308.419	5.5	11	518
20	256.655	306.966	5.5	11	547
21	257.257	307.941	5.5	11	575
22	256.318	305.889	5.5	11	602
1	348.036	332.791	5.5	12	11
2	348.425	333.582	5.5	12	39
3	347.791	332.119	5.5	12	66
4	346.852	331.028	5.5	12	94
5	347.198	330.976	5.5	12	122
6	346.352	330.27	5.5	12	150
7	346.152	330.17	5.5	12	178
8	346.749	331.207	5.5	12	206
9	347.113	331.768	5.5	12	234
10	346.955	331.685	5.5	12	261
11	347.366	331.502	5.5	12	289
12	346.983	331.637	5.5	12	317
13	346.51	330.934	5.5	12	345
14	346.221	330.368	5.5	12	375
15	346.28	330.267	5.5	12	403
16	345.633	331.099	5.5	12	432
17	346.078	330.904	5.5	12	461
18	346.346	329.835	5.5	12	490
19	345.865	330.168	5.5	12	519
20	345.345	329.547	5.5	12	548
21	345.744	329.951	5.5	12	576
22	345.746	329.836	5.5	12	603
23	345.61	329.637	5.5	12	630
24	345.417	329.092	5.5	12	656
25	345.484	329.195	5.5	12	684
26	344.733	328.668	5.5	12	712
27	344.666	328.431	5.5	12	738
28	345.504	328.989	5.5	12	765
29	345.711	328.935	5.5	12	792
30	343.418	327.078	5.5	12	819
31	342.295	326.709	5.5	12	844
32	340.099	325.826	5.5	12	871
33	328.632	320.181	8.83258	12	905
34	321.396	323.143	5.5	12	926
1	369.132	357.088	5.5	13	12
2	368.545	358.332	5.5	13	40
3	368.899	358.067	5.5	13	68
4	369.697	358.869	5.5	13	95
5	368.845	358.023	5.5	13	123
6	368.691	357.812	5.5	13	151
7	363.944	358.649	5.5	13	179
8	368.895	359.35	5.5	13	207
9	368.448	358.435	5.5	13	236
10	368.75	357.639	5.5	13	263
11	368.751	356.797	5.5	13	290
12	368.434	358.766	5.5	13	318
13	367.787	357.405	5.5	13	346
14	367.745	361.339	5.5	13	376
15	367.589	357.194	5.5	13	404
16	368.089	359.435	5.5	13	433
17	368.311	357.024	5.5	13	462
18	368.267	357.111	5.5	13	491
19	368.138	358.371	5.5	13	520
1	377.435	396.796	5.5	14	13
2	377.178	395.992	5.5	14	41
3	377.196	396.328	5.5	14	69
4	376.59	396.967	5.5	14	96
5	376.391	396.433	5.5	14	124
6	376.175	395.878	5.5	14	152
7	376.411	396.027	5.5	14	180
8	376.487	395.613	5.5	14	208
9	376.497	395.723	5.5	14	237
10	376.892	395.263	5.5	14	264
11	376.201	395.993	5.5	14	291
12	375.988	395.087	5.5	14	319
13	375.895	394.902	5.5	14	347
14	375.99	395.303	5.5	14	377
15	376.285	396.215	5.5	14	405
16	376.177	396.153	5.5	14	434
17	375.732	395.84	5.5	14	463
18	375.466	395.996	5.5	14	492
19	375.483	395.446	5.5	14	521
20	375.875	394.491	5.5	14	549
21	376.049	394.391	5.5	14	577
22	376.63	394.159	5.5	14	604
23	377.895	392.05	5.5	14	633
24	376.596	393.709	5.5	14	658
25	375.72	394.027	5.5	14	686
26	375.321	394.013	5.5	14	713
27	374.939	394.379	5.5	14	740
28	375.576	394.128	5.5	14	767
29	375.565	394.291	5.5	14	794
30	375.435	394.359	5.5	14	821
31	375.558	394.641	5.5	14	846
32	375.384	394.474	5.5	14	874
33	376.752	393.574	5.5	14	901
34	377.279	393.573	5.5	14	929
36	378.433	392.572	5.5	14	983
37	378.276	393.345	5.5	14	1012
38	377.676	394.416	5.5	14	1040
39	377.717	394.562	5.5	14	1068
40	378.639	394.037	5.5	14	1098
41	378.829	394.094	5.5	14	1126
42	378.941	394.731	5.5	14	1153
43	378.698	394.864	5.5	14	1181
44	378.49	394.964	5.5	14	1209
45	377.187	396.067	5.5	14	1237
46	377.684	396.38	5.5	14	1265
47	377.157	395.438	5.5	14	1293
48	377.163	395.448	5.5	14	1320
49	377.216	394.954	5.5	14	1350
50	378.234	393.592	5.5	14	1379
51	377.685	394.147	5.5	14	1407
52	376.611	393.996	5.5	14	1434
53	377.817	392.713	5.5	14	1462
54	376.431	393.652	5.5	14	1489
55	376.888	394.234	5.5	14	1514
56	377.311	393.53	5.5	14	1542
57	377.174	394.391	5.5	14	1570
58	376.786	393.959	5.5	14	1599
59	376.926	393.719	5.5	14	1627
60	376.698	394.525	5.5	14	1655
61	376.645	394.446	5.5	14	1682
62	376.751	394.244	5.5	14	1710
63	376.991	393.811	5.5	14	1738
64	376.42	395.095	5.5	14	1766
65	376.043	394.991	5.5	14	1796
66	375.378	395.312	5.5	14	1826
67	375.984	395.209	5.5	14	1854
68	380.677	399.018	6.36621	14	1881
69	375.566	394.579	5.5	14	1907
70	375.724	394.126	5.5	14	1935
71	375.469	394.146	5.5	14	1963
72	375.368	394.302	5.5	14	1992
73	375.717	395.227	5.5	14	2019
74	376.247	395.343	5.5	14	2047
75	376.903	395.602	5.5	14	2076
76	377.027	395.615	5.5	14	2105
77	376.736	396.111	5.5	14	2134
78	376.941	396.158	5.5	14	2162
79	376.807	396.421	5.5	14	2191
80	377.462	396.309	5.5	14	2220
81	378.556	396.755	5.5	14	2248
82	378.212	395.826	5.5	14	2275
83	378.587	396.208	5.5	14	2303
84	378.111	395.92	5.5	14	2330
85	377.476	396.157	5.5	14	2358
86	377.25	395.75	5.5	14	2387
87	377.601	395.896	5.5	14	2414
88	377.649	395.833	5.5	14	2440
89	378.212	395.571	5.5	14	2468
90	377.979	395.028	5.5	14	2496
91	378.048	395.662	5.5	14	2523
92	378.241	395.272	5.5	14	2552
93	378.485	395.041	5.5	14	2580
94	378.005	395.081	5.5	14	2609
95	378.159	394.777	5.5	14	2636
96	378.775	394.456	5.5	14	2664
97	379.412	394.092	5.5	14	2692
98	379.8	394.579	5.5	14	2719
99	379.318	394.429	5.5	14	2747
100	378.712	394.732	5.5	14	2776
101	379.414	394.957	5.5	14	2805
102	379.954	394.767	5.5	14	2833
103	379.964	395.012	5.5	14	2858
104	379.423	395.025	5.5	14	2884
1	386.756	410.521	5.5	15	14
2	386.762	411.056	5.5	15	42
3	386.851	410.929	5.5	15	70
4	386.788	411.091	5.5	15	97
5	386.239	411.933	5.5	15	125
6	386.38	411.731	5.5	15	153
7	386.524	411.484	5.5	15	181
8	386.367	410.823	5.5	15	209
9	386.603	410.534	5.5	15	238
10	386.851	410.473	5.5	15	265
11	386.599	410.691	5.5	15	292
12	386.391	410.78	5.5	15	320
13	386.733	410.155	5.5	15	348
14	386.586	410.013	5.5	15	378
15	386.84	410.237	5.5	15	406
16	386.539	409.855	5.5	15	435
17	387.568	410.212	5.5	15	464
18	386.469	410.797	5.5	15	493
19	387.334	410.544	5.5	15	522
20	387.944	410.1	5.5	15	550
21	386.541	410.283	5.5	15	578
22	386.666	409.906	5.5	15	605
23	386.806	409.653	5.5	15	634
24	386.395	409.822	5.5	15	659
25	385.97	409.797	5.5	15	687
26	385.911	410.079	5.5	15	714
27	385.951	409.548	5.5	15	741
28	386.168	409.357	5.5	15	768
29	386.434	409.286	5.5	15	795
30	387.008	409.374	5.5	15	822
31	385.968	409.607	5.5	15	847
32	386.948	409.343	5.5	15	875
33	386.597	409.603	5.5	15	902
34	386.193	410.625	5.5	15	930
35	389.094	409.354	6.99839	15	961
36	387.2	409.604	5.5	15	984
37	388.444	410.338	5.5	15	1013
39	387.792	410.856	5.5	15	1069
1	401.957	417.373	5.5	16	15
2	401.623	416.5	5.5	16	43
3	401.927	417.256	5.5	16	71
4	401.642	417.227	5.5	16	98
5	401.802	417.1	5.5	16	126
6	401.403	416.679	5.5	16	154
7	401.237	416.582	5.5	16	182
8	401.449	416.55	5.5	16	210
9	401.68	416.564	5.5	16	239
10	401.572	416.991	5.5	16	266
11	401.161	416.682	5.5	16	293
12	400.632	415.897	5.5	16	321
13	401.239	416.388	5.5	16	349
14	401.457	416.51	5.5	16	379
15	401.46	416.415	5.5	16	407
16	401.007	416.441	5.5	16	436
17	400.906	416.74	5.5	16	465
18	400.836	416.25	5.5	16	494
19	400.775	415.93	5.5	16	523
20	400.732	415.955	5.5	16	551
21	401.202	416.547	5.5	16	579
22	401.287	416.399	5.5	16	606
23	401.009	416.285	5.5	16	635
24	401.081	416.8	5.5	16	660
25	401.271	416.842	5.5	16	688
26	401.216	416.496	5.5	16	715
27	401.232	416.54	5.5	16	742
28	401.302	416.411	5.5	16	769
29	401.261	416.203	5.5	16	796
30	401.409	417.068	5.5	16	823
31	401.523	417.092	5.5	16	848
32	401.308	416.954	5.5	16	876
33	401.342	416.918	5.5	16	903
34	401.448	417.016	5.5	16	931
35	401.233	416.784	5.5	16	959
36	401.874	417.141	5.5	16	985
37	401.74	417.417	5.5	16	1014
38	401.961	417.307	5.5	16	1041
39	402.137	417.561	5.5	16	1070
40	402.036	417.169	5.5	16	1099
41	401.97	417.046	5.5	16	1127
42	402.23	417.477	5.5	16	1154
43	401.985	417.419	5.5	16	1182
44	401.849	417.227	5.5	16	1210
45	401.713	417.122	5.5	16	1238
46	401.612	416.933	5.5	16	1266
47	401.661	416.848	5.5	16	1295
48	401.758	416.674	5.5	16	1322
49	402.574	417.199	5.5	16	1352
50	401.916	416.993	5.5	16	1381
51	401.906	417.18	5.5	16	1409
52	401.576	416.63	5.5	16	1435
53	401.451	416.107	5.5	16	1464
54	401.478	416.211	5.5	16	1490
55	401.493	416.33	5.5	16	1516
56	401.703	415.65	5.5	16	1544
57	401.733	416.459	5.5	16	1572
58	401.626	416.195	5.5	16	1601
59	401.561	416.069	5.5	16	1629
60	401.558	416.034	5.5	16	1657
61	401.264	415.635	5.5	16	1684
62	401.322	415.508	5.5	16	1711
63	401.294	415.876	5.5	16	1740
64	401.688	416.345	5.5	16	1768
65	402.125	417.376	5.5	16	1797
66	402.429	417.632	5.5	16	1827
67	402.557	417.944	5.5	16	1855
68	402.953	418.045	5.5	16	1883
69	403.4	418.104	5.5	16	1909
70	403.534	419.005	5.5	16	1937
71	403.365	419.25	5.5	16	1965
72	403.694	419.311	5.5	16	1994
73	403.909	419.467	5.5	16	2021
74	404.199	420.752	5.5	16	2049
75	403.76	420.322	5.5	16	2078
76	403.518	420.535	5.5	16	2107
77	403.697	421.213	5.5	16	2136
78	402.706	420.492	5.5	16	2163
80	402.919	418.184	5.5	16	2221
81	403.864	419.343	5.5	16	2249
82	404.004	418.993	5.5	16	2276
83	404.098	419.634	5.5	16	2304
84	404.088	419.645	5.5	16	2331
85	403.954	419.245	5.5	16	2359
86	403.758	419.125	5.5	16	2388
87	403.438	418.853	5.5	16	2415
88	403.584	418.848	5.5	16	2441
89	403.687	418.588	5.5	16	2469
90	403.692	419.201	5.5	16	2497
91	403.63	419.332	5.5	16	2525
92	403.624	419.06	5.5	16	2553
93	403.691	419.074	5.5	16	2582
94	403.164	418.646	5.5	16	2611
95	403.194	418.636	5.5	16	2638
96	403.01	417.668	5.5	16	2666
97	403.132	418.827	5.5	16	2693
98	402.97	418.526	5.5	16	2720
99	402.867	418.2	5.5	16	2748
100	402.974	418.175	5.5	16	2777
101	403.232	418.509	5.5	16	2806
102	402.846	417.514	5.5	16	2834
103	403.022	417.489	5.5	16	2859
104	402.605	417.738	5.5	16	2885
105	402.675	417.907	5.5	16	2911
106	402.737	417.659	5.5	16	2936
107	402.556	417.699	5.5	16	2963
108	402.427	417.371	5.5	16	2990
109	401.59	416.563	6.89869	16	3019
110	400.478	415.652	7.35461	16	3045
1	382.022	455.764	5.5	17	16
2	381.658	455.626	5.5	17	44
3	381.857	455.721	5.5	17	72
4	382.458	456.152	5.5	17	99
5	382.151	455.664	5.5	17	127
6	381.881	455.445	5.5	17	155
7	381.887	455.814	5.5	17	183
8	381.468	455.037	5.5	17	211
9	381.686	455.881	5.5	17	240
10	381.584	455.29	5.5	17	267
11	381.808	455.557	5.5	17	294
12	381.434	454.957	5.5	17	322
13	381.935	455.776	5.5	17	350
14	381.402	454.947	5.5	17	380
15	381.35	454.872	5.5	17	408
16	380.821	455.301	5.5	17	437
17	381.264	455.281	5.5	17	466
18	381.351	455.172	5.5	17	495
19	381.38	454.992	5.5	17	524
20	381.063	454.783	5.5	17	552
21	381.18	454.85	5.5	17	580
22	383.476	458.475	5.5	17	607
23	382.548	457.478	5.5	17	636
24	384.201	458.212	5.5	17	661
25	383.579	458.307	5.5	17	689
26	380.919	454.831	5.5	17	716
27	381.142	454.837	5.5	17	743
28	380.875	454.339	5.5	17	770
29	380.607	454.637	5.5	17	797
30	384.103	458.876	5.5	17	824
31	383.989	458.124	5.5	17	849
32	383.727	457.93	5.5	17	877
33	385.551	458.704	5.5	17	904
34	381.423	455.439	5.5	17	932
35	383.785	458.689	5.5	17	960
36	381.519	455.787	5.5	17	986
37	381.403	455.359	5.5	17	1015
38	381.667	455.44	5.5	17	1042
39	382.729	456.969	5.5	17	1071
40	381.993	455.824	5.5	17	1100
41	381.933	455.67	5.5	17	1128
42	382.435	456.454	5.5	17	1155
43	383.583	457.902	5.5	17	1183
44	381.868	455.541	5.5	17	1211
45	381.484	455.125	5.5	17	1239
46	381.637	455.131	5.5	17	1267
47	381.984	455.481	5.5	17	1296
48	381.62	454.877	5.5	17	1323
49	381.773	455.427	5.5	17	1353
50	381.405	455.152	5.5	17	1382
51	381.494	454.838	5.5	17	1410
52	381.894	455.081	5.5	17	1436
53	381.73	454.995	5.5	17	1465
54	381.57	454.591	5.5	17	1491
55	381.017	453.871	5.5	17	1517
56	389.341	457.447	5.5	17	1545
57	383.085	456.637	5.5	17	1573
58	381.969	455.013	5.5	17	1602
59	381.932	454.904	5.5	17	1630
60	382.149	455.427	5.5	17	1658
61	384.481	458.091	5.5	17	1685
62	381.343	454.294	5.5	17	1713
63	381.457	454.471	5.5	17	1741
64	381.616	454.204	5.5	17	1769
65	381.713	454.217	5.5	17	1798
66	381.335	454.151	5.5	17	1829
67	381.656	454.488	5.5	17	1857
68	381.486	454.099	5.5	17	1884
69	382.15	455.355	5.5	17	1910
70	381.591	454.597	5.5	17	1938
71	381.757	454.615	5.5	17	1966
72	381.543	454.238	5.5	17	1995
73	382.017	454.649	5.5	17	2022
74	382.557	455.565	5.5	17	2050
75	382.184	454.654	5.5	17	2079
76	384.383	458.22	5.5	17	2108
77	382.25	455.29	5.5	17	2137
78	382.494	455.472	5.5	17	2164
79	382.39	455.3	5.5	17	2192
80	382.645	455.601	5.5	17	2222
81	382.727	455.529	5.5	17	2250
82	382.78	455.54	5.5	17	2277
83	383.243	456.041	5.5	17	2305
84	382.818	455.491	5.5	17	2332
85	383.508	456.123	5.5	17	2360
86	382.817	455.609	5.5	17	2389
87	383.573	456.436	5.5	17	2416
88	384.196	457.296	5.5	17	2442
89	384.054	457.355	5.5	17	2470
90	382.91	455.813	5.5	17	2498
91	385.585	458.95	5.5	17	2526
92	388.899	458.817	5.5	17	2555
1	402.659	337.588	8.17759	18	17
2	403.59	338.737	7.28299	18	45
3	404.428	338.876	5.5	18	67
4	402.224	338.045	8.37676	18	100
5	401.688	337.617	9.30218	18	128
6	402.043	338.105	8.98522	18	156
7	400.873	337.237	9.61231	18	184
8	402.68	338.255	8.03893	18	212
9	403.819	338.709	5.5	18	235
10	403.261	338.436	5.5	18	262
11	401.561	337.218	9.25794	18	295
12	401.525	337.629	8.28022	18	323
13	401.066	337.029	8.89045	18	351
14	401.973	337.651	8.45383	18	381
15	402.198	337.967	7.71209	18	409
16	401.552	337.965	6.93747	18	438
17	401.497	337.288	8.4581	18	467
18	401.463	337.101	9.13853	18	496
19	401.44	337.517	8.09736	18	525
20	400.928	337.137	8.55184	18	553
21	401.776	337.573	8.15378	18	581
22	402.286	337.752	7.32512	18	608
23	407.307	341.281	6.32706	18	631
24	412.458	344.929	5.5	18	657
25	412.325	345.102	5.5	18	685
1	379.34	369.528	10.8353	19	18
2	379.466	370.016	11.3282	19	46
3	379.373	369.643	11.0149	19	73
4	379.189	369.804	10.2585	19	101
5	379.629	369.684	10.8673	19	129
6	379.716	370.189	10.8157	19	157
7	379.547	369.964	10.8263	19	185
8	379.445	370.531	10.4764	19	213
9	379.064	370.334	10.4273	19	241
10	379.341	370.048	10.6794	19	268
11	379.28	369.726	10.637	19	296
12	378.795	369.171	10.5256	19	324
13	379.182	369.354	10.2699	19	352
14	379.091	369.36	10.3028	19	382
15	378.642	369.67	10.678	19	410
16	377.997	369.457	9.97988	19	439
17	378.422	369.067	10.5972	19	468
18	378.464	369.097	10.315	19	497
19	378.908	369.323	10.0853	19	526
20	378.83	370.013	10.0481	19	554
21	378.679	369.736	10.3341	19	582
22	378.41	370.127	9.87934	19	609
23	378.597	373.362	7.07638	19	632
24	378.461	369.914	10.3242	19	663
25	378.548	369.617	10.1509	19	691
26	378.231	368.645	10.6406	19	718
27	378.592	368.894	10.7298	19	745
28	378.504	369.352	10.5662	19	772
29	378.388	369.445	10.544	19	799
30	378.476	368.932	10.9871	19	825
31	378.547	368.902	11.3471	19	851
32	378.801	368.885	11.1737	19	879
33	379.144	368.943	11.2405	19	907
34	378.871	369.177	11.361	19	934
35	380.294	375.971	8.42925	19	958
36	379.089	369.706	11.2604	19	989
37	379.436	369.495	11.2007	19	1017
38	379.57	369.467	11.2665	19	1044
39	380.108	369.722	11.2381	19	1073
40	379.933	369.421	11.4768	19	1102
41	379.898	369.946	11.6606	19	1131
42	379.964	369.759	11.5208	19	1157
43	379.747	369.444	11.3672	19	1185
44	379.87	369.575	11.1509	19	1213
45	379.722	369.616	11.3501	19	1241
46	379.49	368.785	11.0303	19	1269
47	379.309	368.689	10.9554	19	1298
48	379.573	369.397	11.1154	19	1326
49	379.41	369.263	11.6079	19	1356
50	379.469	369.483	10.5701	19	1385
51	379.317	368.908	10.9197	19	1413
52	379.105	368.049	10.7448	19	1440
53	379.24	367.954	11.1976	19	1468
54	373.608	363.436	8.0227	19	1488
55	378.482	367.39	10.6316	19	1520
56	378.847	367.76	10.5733	19	1548
57	378.581	367.265	11.2223	19	1576
58	379.096	367.748	11.2016	19	1605
59	379.073	367.384	10.9422	19	1633
60	379.244	367.735	11.397	19	1661
61	378.351	366.863	11.3192	19	1688
62	379.537	367.415	11.9003	19	1716
63	378.819	366.429	11.8674	19	1745
64	379.064	366.71	11.7503	19	1773
65	379.132	366.36	12.0653	19	1803
66	379.604	367.146	12.3408	19	1832
67	379.216	366.685	12.046	19	1860
69	377.965	365.623	11.8913	19	1913
70	377.945	365.839	12.0442	19	1941
71	378.167	365.888	12.2175	19	1970
72	378.847	366.789	12.5327	19	1999
73	380.054	367.51	12.9101	19	2026
74	380.266	367.719	13.0908	19	2054
75	379.61	367.574	12.6227	19	2083
76	380.363	368.388	13.055	19	2112
77	378.623	366.472	12.3537	19	2141
78	379.798	367.718	12.8771	19	2170
79	380.367	367.864	12.7382	19	2198
80	380.338	367.95	12.9292	19	2227
81	380.069	367.018	12.9194	19	2255
82	375.238	363.047	10.2543	19	2279
83	379.588	367.47	12.8078	19	2310
84	379.119	366.704	12.5969	19	2337
85	379.26	366.497	12.827	19	2365
86	379.627	366.718	12.6198	19	2394
87	380.519	367.707	12.6675	19	2421
88	379.945	367.222	12.7121	19	2448
89	379.603	367.151	12.6334	19	2474
90	380.055	367.733	12.8455	19	2502
91	378.837	366.424	12.3928	19	2530
1	278.528	281.772	13.4327	20	19
3	277.978	282.562	13.001	20	74
4	278.023	282.946	12.6068	20	102
5	278.749	282.224	13.2093	20	130
6	278.442	282.674	12.927	20	158
7	278.224	282.518	12.8148	20	186
8	278.074	282.34	12.5824	20	214
10	277.365	281.651	12.6484	20	269
11	277.754	282.005	12.3977	20	297
12	277.948	280.873	12.5748	20	325
13	278.021	280.057	12.8292	20	353
14	277.963	280.009	12.7229	20	383
[truncated: 2,530 more rows]
