# Supplementary material for: Functional visualization of NK cell-mediated killing of metastatic single tumor cells
Source: eLife journal article supplement (doi:10.7554/elife.76269), 2022-02-03
Supplement: supp [file tumor_6.xlsx]

## Sheet: Sheet1
1	207.085	61.0459	5.5	1	0
2	207.112	61.681	5.5	1	14
3	207.083	61.0831	5.5	1	29
4	206.943	60.0186	5.5	1	44
5	207.051	60.7261	5.5	1	59
6	206.841	61.4999	5.5	1	73
7	206.622	61.0519	5.5	1	88
8	206.941	60.5048	5.5	1	102
9	207.054	59.8284	5.5	1	117
10	207.127	59.8892	5.5	1	132
11	207.055	60.2206	5.5	1	147
12	206.908	61.323	5.5	1	162
13	207.353	62.6637	5.5	1	177
14	207.389	62.56	5.5	1	191
15	207.639	61.0379	5.5	1	206
16	207.697	61.0401	5.5	1	221
17	208.147	60.4769	5.5	1	236
18	208.308	60.8647	5.5	1	251
19	207.954	60.9275	5.5	1	266
20	208.316	61.2877	5.5	1	281
21	208.38	61.1768	5.5	1	296
22	208.226	61.5675	5.5	1	311
23	208.6	61.5926	5.5	1	326
24	208.661	61.3667	5.5	1	341
25	208.43	61.2083	5.5	1	356
26	208.354	60.9101	5.5	1	371
27	207.988	61.4321	5.5	1	386
28	207.966	61.1945	5.5	1	402
29	207.795	60.8848	5.5	1	418
30	207.964	61.0417	5.5	1	434
31	208.052	60.6455	5.5	1	450
32	207.918	60.9769	5.5	1	466
33	207.597	61.0265	5.5	1	482
34	207.661	61.2651	5.5	1	497
35	207.444	60.552	5.5	1	513
36	207.732	59.7381	5.5	1	528
37	207.774	60.2482	5.5	1	544
38	207.52	60.1096	5.5	1	560
39	207.518	60.2769	5.5	1	576
40	207.476	60.5199	5.5	1	592
41	207.45	60.1917	5.5	1	608
42	207.375	59.6525	5.5	1	622
43	207.787	59.6909	5.5	1	637
44	207.498	59.9939	5.5	1	653
45	207.375	60.0514	5.5	1	669
46	207.311	60.3049	5.5	1	685
47	207.171	59.6872	5.5	1	701
48	207.274	60.8384	5.5	1	717
49	207.523	59.0441	5.5	1	733
50	207.433	59.3128	5.5	1	749
51	207.386	59.5858	5.5	1	765
52	207.026	59.1729	6.87117	1	782
53	206.946	59.8743	7.31147	1	797
54	207.102	59.5127	7.16302	1	811
55	207.09	59.8442	8.02215	1	825
56	207.353	60.2466	8.05759	1	838
57	207.455	60.5351	8.2582	1	852
58	207.767	60.0567	7.89692	1	867
59	207.791	60.2757	8.60443	1	880
60	207.649	60.5099	7.76728	1	894
61	207.865	60.4274	7.89279	1	908
62	207.886	60.5522	8.03114	1	922
63	208.3	60.3158	8.2493	1	936
64	208.803	60.2699	8.57783	1	950
65	208.49	61.0254	8.01823	1	965
66	208.534	61.1839	7.40131	1	980
67	208.651	61.6449	5.5	1	993
68	208.741	61.2837	5.5	1	1008
69	208.511	60.7291	5.5	1	1022
70	208.297	60.4401	7.25111	1	1040
71	208.522	60.2044	5.5	1	1053
72	207.808	60.2813	6.92524	1	1072
73	207.376	60.6889	7.10807	1	1087
74	207.873	60.2383	5.5	1	1101
75	207.992	60.4709	5.5	1	1117
76	207.652	59.7917	7.02163	1	1134
77	207.742	59.3992	7.31225	1	1150
78	207.756	59.1168	8.20556	1	1166
79	207.59	59.705	7.20308	1	1182
80	207.247	59.7831	7.33624	1	1199
81	207.565	60.3258	5.5	1	1213
82	207.318	60.4049	6.99163	1	1231
83	207.151	60.4503	7.45535	1	1247
84	206.525	60.6046	9.57266	1	1263
85	206.928	61.0143	9.20179	1	1279
86	207.308	60.5384	7.9185	1	1295
87	207.044	60.4167	8.51707	1	1311
88	207.198	59.4584	7.31919	1	1327
89	207.476	59.9632	5.5	1	1341
90	207.388	59.7794	8.14118	1	1359
91	207.338	59.6345	8.72062	1	1375
92	207.714	59.5144	8.51969	1	1390
93	207.852	59.4385	8.21479	1	1406
94	207.483	59.4414	7.76586	1	1422
95	207.77	59.956	9.07611	1	1438
96	207.591	59.936	9.58026	1	1452
97	208.153	59.1809	9.51088	1	1466
98	208.291	59.7307	10.0189	1	1482
99	208.446	58.9724	9.7316	1	1497
100	209.057	59.6087	9.1095	1	1513
101	208.681	60.6542	9.14362	1	1530
102	208.385	60.3765	9.45923	1	1547
103	208.889	60.5277	9.86645	1	1564
104	209.297	60.494	9.95838	1	1580
105	209.029	60.8177	10.0528	1	1595
106	208.263	61.0743	9.87616	1	1610
107	208.042	61.5693	9.84369	1	1627
108	208.933	61.3937	9.72966	1	1644
109	208.912	61.1486	9.59013	1	1661
110	208.615	61.4124	9.4784	1	1678
111	208.241	61.2971	10.0002	1	1695
112	208.781	60.5984	8.711	1	1711
113	209.053	60.0215	9.24482	1	1728
114	208.893	60.1478	8.29237	1	1745
115	208.862	60.3796	8.461	1	1762
116	208.658	60.3762	8.69814	1	1779
117	208.735	60.267	8.85491	1	1796
118	208.545	58.9988	9.722	1	1813
119	208.466	58.5784	9.41209	1	1830
120	208.375	59.133	8.90464	1	1845
121	208.251	59.5955	8.62119	1	1862
122	208.46	59.1093	8.96785	1	1878
123	208.703	59.1591	8.71816	1	1894
124	208.713	58.7585	9.12913	1	1911
125	208.288	59.3487	9.77736	1	1928
126	207.96	58.7934	9.7781	1	1946
127	207.963	59.1738	9.49247	1	1963
128	208.575	59.5026	8.83269	1	1981
129	208.274	58.5443	9.38177	1	1999
130	208.369	58.3588	9.72141	1	2017
131	208.207	58.9552	9.80712	1	2035
132	208.143	58.8423	10.5824	1	2053
133	208.113	57.9812	10.4205	1	2070
134	208.015	58.341	10.0957	1	2087
135	208.104	58.9038	10.0869	1	2104
136	208.479	59.3419	10.126	1	2122
137	208.824	59.4755	11.1338	1	2138
138	208.683	59.0873	10.7894	1	2155
139	208.628	59.0849	10.7441	1	2171
140	209.165	58.5188	10.8302	1	2187
141	208.879	59.8488	10.8711	1	2203
142	209.247	60.2949	10.566	1	2219
143	209.214	59.911	10.8316	1	2235
144	209.296	59.883	10.9474	1	2251
145	209.377	59.7309	10.8522	1	2266
146	209.17	59.1221	10.8523	1	2282
147	208.975	59.4093	10.4117	1	2298
148	209.077	59.3885	10.0555	1	2315
149	209.115	59.4814	10.2252	1	2331
150	209.117	59.3949	10.4475	1	2346
151	209.124	59.1416	10.645	1	2362
152	209.025	59.2106	10.3454	1	2380
153	208.929	59.302	10.3291	1	2396
154	208.69	59.345	9.8522	1	2414
155	208.654	59.4608	9.92103	1	2432
156	208.692	59.2054	9.84819	1	2450
157	208.816	59.2514	10.2356	1	2468
158	208.751	59.0553	10.4774	1	2485
159	208.966	58.4126	10.5202	1	2501
160	208.704	58.3072	10.5856	1	2518
161	208.473	58.1655	10.1386	1	2536
162	208.485	58.2726	10.1238	1	2553
163	208.843	58.2138	10.3613	1	2570
164	208.756	58.2759	10.4805	1	2587
165	208.887	58.0489	10.6002	1	2604
166	208.637	58.7228	10.469	1	2621
167	208.609	58.9509	10.0867	1	2639
168	209.05	58.2886	9.83686	1	2655
169	209.058	58.4527	10.0736	1	2671
170	209.046	58.567	10.1164	1	2688
171	209.194	58.4978	10.261	1	2705
172	209.197	58.9633	9.78211	1	2723
173	209.571	59.257	9.71266	1	2738
174	209.641	59.5336	9.54914	1	2755
175	210.096	60.9185	9.1374	1	2771
176	210.207	61.3444	8.9753	1	2788
177	210.359	61.6518	9.0713	1	2805
178	210.556	61.924	9.16738	1	2822
179	210.492	60.538	9.92055	1	2839
180	210.593	60.7774	9.81942	1	2856
181	210.784	60.5097	9.76151	1	2873
182	210.839	60.5895	9.90738	1	2890
183	210.839	60.9925	10.0238	1	2907
184	210.887	61.0928	9.81553	1	2923
185	210.967	59.5667	9.90572	1	2939
186	210.915	60.388	9.36949	1	2955
187	210.776	60.0336	9.48932	1	2971
188	211.087	61.5811	8.87186	1	2986
189	211.337	64.3484	7.82875	1	3001
190	211.336	63.4072	7.94447	1	3016
191	211.381	64.1098	8.10332	1	3031
192	211.134	62.6277	8.51154	1	3046
193	211.387	65.6351	8.05119	1	3061
194	211.206	65.5502	7.70793	1	3076
195	211.119	63.8523	7.05023	1	3091
196	211.315	62.1704	7.01873	1	3106
197	211.218	61.7463	7.76256	1	3121
198	211.015	60.6311	8.38822	1	3136
199	210.755	58.9187	8.91208	1	3151
200	210.922	59.8228	8.68997	1	3166
201	210.908	59.8448	8.87634	1	3181
202	210.963	61.3621	8.18569	1	3196
203	210.927	60.8009	8.44914	1	3211
204	210.978	60.4816	8.23759	1	3226
205	211.063	60.653	8.61417	1	3241
206	211.248	63.0983	8.40716	1	3256
207	211.141	62.6883	8.12925	1	3271
208	210.957	61.6335	8.83768	1	3286
209	210.914	60.0683	9.57343	1	3301
210	210.841	59.3874	9.83244	1	3316
211	210.846	60.2621	9.57128	1	3331
212	210.883	61.1151	9.67074	1	3346
213	211.116	61.408	9.30007	1	3361
214	211.392	63.8548	9.37032	1	3376
215	211.502	64.6075	9.40065	1	3391
216	211.885	65.9414	9.2689	1	3406
217	211.992	66.1271	9.68365	1	3421
218	212.055	64.9021	9.9299	1	3437
219	212.131	65.2733	9.92148	1	3453
220	212.238	64.5659	10.0627	1	3470
221	212.431	64.387	10.1252	1	3487
222	212.564	65.4084	9.97636	1	3503
223	212.65	66.2571	10.0621	1	3520
224	212.567	66.2807	10.031	1	3536
225	212.611	65.2344	9.67126	1	3553
226	212.702	64.3171	9.54418	1	3570
227	212.653	64.5985	9.4816	1	3587
228	212.517	64.8356	9.08256	1	3604
229	212.342	65.2973	9.21002	1	3620
230	212.497	64.0721	9.08268	1	3636
231	212.418	61.6969	9.83807	1	3652
232	212.319	61.9705	9.97899	1	3668
233	212.293	61.3163	9.81799	1	3683
234	212.181	60.9084	9.83761	1	3698
235	212.034	60.8001	9.78066	1	3713
236	211.968	60.8424	9.77646	1	3728
237	211.921	60.1828	9.8005	1	3743
238	211.862	60.0635	10.0829	1	3758
239	211.755	59.3547	10.1903	1	3773
240	211.586	58.8288	10.4865	1	3787
241	211.327	58.7724	10.2028	1	3802
1	91.4584	92.1699	5.5	2	1
2	91.9718	92.4353	5.5	2	15
3	91.5215	91.4285	5.5	2	30
4	91.485	90.8853	5.5	2	45
5	91.5611	90.0433	6.62879	2	60
6	91.2813	90.2383	6.55435	2	74
7	91.4387	90.3164	6.38218	2	89
8	95.2019	93.9369	5.5	2	103
9	91.4614	91.7243	5.5	2	118
10	90.8766	91.5584	5.5	2	133
11	91.1821	90.902	5.5	2	148
12	91.1938	90.9001	6.53815	2	163
13	91.2189	91.2612	6.52731	2	178
14	91.4108	90.711	6.9504	2	192
15	91.7911	90.285	7.44271	2	207
16	91.7683	90.5921	6.89362	2	222
17	92.0706	90.2607	6.77802	2	237
18	92.1234	89.9234	7.06953	2	252
19	92.2753	91.0028	7.07949	2	267
20	92.5011	87.3708	6.44274	2	282
21	93.1384	87.3648	6.46707	2	297
22	93.0681	87.5314	6.46981	2	312
23	92.187	91.8571	6.70495	2	327
24	92.3157	91.5608	6.68793	2	342
25	92.5401	90.9155	7.0104	2	357
26	92.2106	90.9726	6.83149	2	372
27	92.5511	91.0098	7.00576	2	387
28	92.8002	87.3008	6.46167	2	403
29	91.7749	90.8815	6.65921	2	419
30	91.6938	91.0052	6.48745	2	435
31	91.6044	90.5299	6.64716	2	451
32	91.6903	90.6762	6.64437	2	467
33	91.8452	90.3824	6.76985	2	483
34	92.3608	85.7245	6.62378	2	498
35	92.4093	85.7286	6.60591	2	514
36	91.9929	86.3292	6.26066	2	529
37	92.2381	86.0254	6.34749	2	545
38	91.4558	90.0915	6.57998	2	561
39	91.7869	90.1511	6.76516	2	577
40	91.9604	85.3276	6.79956	2	593
41	92.4005	84.6297	6.9045	2	609
42	90.4753	80.8228	7.68111	2	623
43	92.2964	84.5819	6.85247	2	638
44	91.9417	84.7171	6.64885	2	654
45	91.5636	84.597	6.63256	2	670
46	91.8199	84.5095	6.84037	2	686
47	91.9492	84.3219	6.89855	2	702
48	91.8882	84.3828	6.93411	2	718
49	91.7617	84.2336	6.92744	2	734
50	91.6034	84.0237	6.84065	2	750
51	91.4408	83.6591	6.8491	2	766
52	91.5172	83.9474	6.94641	2	780
53	91.598	83.417	7.64638	2	795
54	92.0631	83.6436	7.84361	2	809
55	92.229	84.0525	7.83595	2	823
56	91.8178	88.9375	9.08779	2	839
57	87.9553	86.93	10.2907	2	853
58	92.0081	84.5158	7.75768	2	865
59	90.1565	81.1158	7.90459	2	878
60	92.4675	84.9179	7.96114	2	892
61	92.6522	85.0017	8.09636	2	906
62	92.7952	85.3052	7.87077	2	920
63	93.4327	75.6711	5.5	2	934
65	93.0216	75.4095	5.5	2	963
66	90.6655	81.5037	7.94671	2	978
67	92.6401	85.1987	7.89927	2	994
68	93.1267	85.5814	7.76174	2	1009
69	92.8461	91.0795	7.78535	2	1024
70	92.4699	91.0741	7.55659	2	1038
71	91.7357	91.2915	6.92381	2	1055
72	91.7417	91.0491	7.25013	2	1070
73	92.1074	89.9137	8.37193	2	1088
74	92.4558	89.7686	8.81326	2	1104
75	92.4204	89.5631	9.16452	2	1120
76	92.4661	89.3745	9.08028	2	1135
77	92.1241	89.145	9.31107	2	1151
78	87.8555	87.0325	9.80749	2	1167
79	87.7339	86.8198	10.1115	2	1183
1	230.197	145.895	5.5	3	2
2	229.358	145.407	5.5	3	16
3	230.409	144.946	5.5	3	31
4	230.278	144.739	5.5	3	46
5	228.501	145.781	5.5	3	61
6	229.889	144.323	5.5	3	75
7	229.895	144.513	5.5	3	90
8	229.26	144.889	5.5	3	104
9	229.244	145.33	5.5	3	119
10	230.009	145.536	5.5	3	134
11	228.94	146.253	5.5	3	149
12	227.384	146.868	5.5	3	164
13	227.358	146.939	5.5	3	179
14	227.801	147.306	5.5	3	193
15	228.876	146.915	5.5	3	208
16	230.29	146.133	5.5	3	223
17	231.562	146.192	5.5	3	238
18	230.732	146.784	5.5	3	253
19	230.299	146.62	5.5	3	268
20	230.144	146.665	5.5	3	283
21	230.253	146.982	5.5	3	298
22	230.884	147.291	5.5	3	313
23	231.482	147.341	5.5	3	328
24	231.168	147.644	5.5	3	343
25	231.475	146.779	5.5	3	358
26	231.491	146.383	5.5	3	373
27	230.352	146.828	5.5	3	388
28	231.296	146.419	5.5	3	404
29	230.887	146.806	5.5	3	420
30	231.181	146.644	5.5	3	436
31	230.697	146.85	5.5	3	452
32	229.96	146.938	5.5	3	468
33	230.407	146.046	5.5	3	484
34	229.972	146.254	5.5	3	499
35	230.128	146.05	5.5	3	515
36	230.656	146.382	5.5	3	530
37	230.714	146.577	5.5	3	546
38	229.272	146.789	5.5	3	562
39	229.535	145.972	5.5	3	578
40	229.756	145.775	5.5	3	594
41	230.221	145.149	5.5	3	610
42	229.597	145.81	5.5	3	624
43	230.111	146.081	5.5	3	639
44	229.472	146.677	5.5	3	655
45	228.378	146.922	5.5	3	671
46	228.416	146.236	5.5	3	687
47	228.31	145.931	5.5	3	703
48	228.862	145.801	5.5	3	719
49	229.379	145.686	5.5	3	735
50	229.646	145.774	5.5	3	751
51	229.431	145.667	5.5	3	767
52	228.735	145.715	5.5	3	781
53	228.621	145.582	5.5	3	796
54	228.674	145.68	5.5	3	810
55	229.301	145.882	5.5	3	824
56	230.175	146.163	5.5	3	837
57	230.761	146.346	5.5	3	851
58	229.631	146.958	5.5	3	866
59	229.686	146.832	5.5	3	879
60	229.414	146.992	5.5	3	893
61	229.987	147.24	5.5	3	907
62	229.815	147.774	5.5	3	921
63	229.881	148.295	5.5	3	935
64	230.7	148.055	5.5	3	949
65	230.161	147.75	5.5	3	964
66	230.547	147.095	5.5	3	979
67	230.697	146.773	5.5	3	995
68	230.535	147.02	5.5	3	1010
69	230.675	147.201	5.5	3	1025
70	229.992	147.865	5.5	3	1039
71	229.243	148.234	5.5	3	1056
72	228.331	148.149	5.5	3	1071
73	228.389	147.449	5.5	3	1086
74	228.908	147.117	5.5	3	1103
75	229.034	147.292	5.5	3	1119
76	229.582	147.155	5.5	3	1133
77	230.345	146.554	5.5	3	1149
78	230.287	146.273	5.5	3	1165
79	229.77	146.169	5.5	3	1181
80	229.339	146.023	5.5	3	1198
81	228.346	146.712	5.5	3	1215
82	228.828	146.777	5.5	3	1230
83	229.616	146.611	5.5	3	1246
84	230.077	146.48	5.5	3	1262
85	228.286	147.105	5.5	3	1278
86	229.864	145.853	5.5	3	1294
87	229.688	145.023	5.5	3	1310
88	230.042	145.121	5.5	3	1326
89	230.095	145.502	5.5	3	1343
90	229.898	145.885	5.5	3	1358
91	230.075	146.16	5.5	3	1374
92	228.916	146.442	5.5	3	1389
93	229.706	145.482	5.5	3	1405
94	230.207	144.766	5.5	3	1421
95	230.728	145.032	5.5	3	1437
96	231.276	145.317	5.5	3	1451
97	231.837	145.657	5.5	3	1465
98	231.932	145.864	5.5	3	1481
99	231.687	145.764	5.5	3	1496
100	231.799	145.909	5.5	3	1512
101	231.599	146.152	5.5	3	1529
102	231.05	147.026	5.5	3	1546
103	232.303	146.634	5.5	3	1563
104	233.246	146.526	5.5	3	1579
105	232.916	146.499	5.5	3	1594
106	232.388	146.329	5.5	3	1609
107	232.437	146.297	5.5	3	1626
108	233.069	146.158	5.5	3	1643
109	233.011	145.902	5.5	3	1660
110	233.314	145.79	5.5	3	1677
111	232.145	146.743	5.5	3	1694
112	231.345	146.617	5.5	3	1710
113	231.401	145.773	5.5	3	1727
114	232.153	145.097	5.5	3	1744
115	232.169	144.864	5.5	3	1761
116	232.149	145.243	5.5	3	1778
117	232.299	145.433	5.5	3	1795
118	232.103	145.26	5.5	3	1812
119	231.564	145.42	5.5	3	1829
120	231.904	144.558	5.5	3	1844
121	231.38	144.526	5.5	3	1861
122	231.233	144.696	5.5	3	1877
123	231.845	144.829	5.5	3	1893
124	232.672	144.214	5.5	3	1910
125	232.265	144.428	5.5	3	1927
126	231.815	144.3	5.5	3	1945
127	232.556	143.611	5.5	3	1962
128	232.428	143.401	5.5	3	1980
129	232.661	143.472	5.5	3	1998
130	232.515	143.679	5.5	3	2016
131	232.078	144.285	5.5	3	2034
132	231.863	144.132	5.5	3	2052
133	231.798	144.024	5.5	3	2069
134	231.897	143.97	5.5	3	2085
135	231.731	144.439	5.5	3	2103
136	232.331	144.548	5.5	3	2121
137	233.289	144.225	5.5	3	2137
138	234.319	143.346	7.72525	3	2154
139	234.306	143.188	7.5411	3	2170
140	233.952	143.415	7.69594	3	2186
141	234.042	143.544	8.82533	3	2202
142	233.765	144.117	7.80263	3	2218
143	234.022	144.295	7.18884	3	2234
144	234.084	145.442	5.5	3	2250
145	234.2	145.257	5.5	3	2265
146	234.07	145.212	5.5	3	2281
147	234.268	144.072	7.0917	3	2297
148	234.469	143.691	7.60355	3	2314
149	233.907	145.012	5.5	3	2330
150	234.102	144.832	5.5	3	2345
151	234.827	143.893	6.81609	3	2361
152	234.784	143.986	6.82218	3	2379
153	234.297	143.659	7.41146	3	2395
154	234.284	143.328	7.65821	3	2413
155	233.957	143.146	7.65728	3	2431
156	233.705	144.377	5.5	3	2449
157	233.91	143.797	6.89495	3	2467
158	234.251	143.141	7.54826	3	2484
159	234.611	142.659	7.7865	3	2500
160	234.479	142.566	8.42507	3	2517
161	234.318	142.361	8.29107	3	2535
162	234.199	142.565	8.06488	3	2552
163	234.344	142.243	8.7497	3	2569
164	234.646	142.391	8.65994	3	2586
165	234.366	142.821	7.93076	3	2603
166	234.077	142.987	8.07267	3	2620
167	234.296	142.512	8.73317	3	2637
168	234.013	142.394	8.71909	3	2654
169	233.942	141.754	9.31647	3	2673
170	234.144	141.299	9.66848	3	2691
171	234.61	141.093	9.69491	3	2708
172	234.53	141.992	9.07367	3	2722
173	234.746	141.759	9.53832	3	2741
174	234.683	141.934	9.98941	3	2757
175	234.576	141.812	10.0691	3	2773
176	234.655	141.583	10.1966	3	2790
177	235.095	141.844	9.9916	3	2808
178	234.957	141.973	10.3471	3	2824
179	235.981	141.984	10.1987	3	2841
180	235.819	142.537	9.9233	3	2858
181	235.747	142.466	10.2468	3	2875
182	235.419	142.871	10.1366	3	2893
183	235.355	142.915	10.4239	3	2908
184	235.858	142.644	10.3732	3	2925
185	235.747	142.732	10.3176	3	2942
186	235.79	143.135	9.92106	3	2958
187	235.763	143.206	9.95705	3	2974
188	235.179	143.345	9.84059	3	2988
189	235.798	142.364	9.9607	3	3004
190	234.823	143.203	9.77239	3	3019
191	234.775	143.334	9.97993	3	3034
192	234.192	143.763	9.47527	3	3049
193	234.928	143.49	9.7104	3	3064
194	235.805	142.372	9.92047	3	3079
195	234.605	142.7	9.42971	3	3094
196	234.863	142.057	10.263	3	3109
197	235.485	141.876	10.208	3	3124
198	235.892	140.988	10.0804	3	3139
199	235.483	141.636	10.0177	3	3154
200	236.198	140.87	10.0402	3	3168
201	236.245	140.503	10.1211	3	3184
202	236.034	140.322	10.1955	3	3199
203	235.8	140.444	10.1849	3	3214
204	235.642	140.991	10.0091	3	3229
205	235.975	141.152	10.0409	3	3244
206	235.998	141.304	9.97231	3	3259
207	235.982	141.383	10.0171	3	3274
208	235.835	140.24	10.2463	3	3289
209	235.792	140.622	10.5659	3	3304
210	235.837	140.037	10.7322	3	3319
211	235.618	140.705	10.4632	3	3334
212	236.059	140.619	10.4843	3	3349
213	235.864	141.462	10.1832	3	3364
214	235.767	141.9	10.347	3	3379
215	235.78	141.897	10.7951	3	3393
216	235.597	141.875	10.8893	3	3409
217	236.794	140.956	11.2803	3	3423
218	236.879	140.752	11.2206	3	3440
219	237.281	140.76	11.1645	3	3456
220	237.444	141.032	11.225	3	3472
221	237.34	141.649	11.2777	3	3489
222	236.367	142.043	11.7582	3	3507
223	236.03	141.866	12.2487	3	3524
224	235.774	141.315	12.4531	3	3540
225	235.741	141.067	12.2373	3	3557
226	235.49	140.708	12.3663	3	3574
227	235.833	140.894	12.3332	3	3591
228	235.922	141.29	12.2151	3	3608
229	235.316	141.002	12.2623	3	3624
230	234.783	140.211	12.2671	3	3640
231	234.834	140.208	12.2466	3	3656
232	235.301	140.668	12.0944	3	3671
233	235.474	140.701	11.9702	3	3686
234	235.55	140.629	11.807	3	3701
235	235.463	140.275	12.0148	3	3716
236	234.851	139.852	12.3472	3	3731
237	234.303	139.25	12.3954	3	3746
238	233.941	138.755	12.494	3	3761
239	234.319	138.99	12.5454	3	3776
240	234.685	139.205	12.4969	3	3790
241	234.518	139.047	12.5119	3	3805
1	368.98	217.25	5.5	4	3
2	368.159	217.28	5.5	4	17
3	368.455	217.26	5.5	4	32
4	368.993	217.083	5.5	4	47
5	368.537	216.437	5.5	4	62
6	368.491	216.725	5.5	4	76
7	368.329	216.971	5.5	4	91
8	367.685	216.771	5.5	4	106
9	367.768	217.286	5.5	4	120
10	368.032	216.935	5.5	4	136
11	368.729	216.65	5.5	4	150
12	368.423	216.815	5.5	4	166
13	368.537	217.483	5.5	4	180
14	368.445	217.995	5.5	4	194
15	368.364	217.561	5.5	4	209
16	368.577	217.911	5.5	4	224
17	369.202	217.747	5.5	4	239
18	369.759	217.805	5.5	4	254
19	369.221	217.806	5.5	4	269
20	369.109	218.145	5.5	4	284
21	369.082	218.453	5.5	4	299
22	368.725	218.595	5.5	4	314
23	369.014	218.678	5.5	4	329
24	369.665	218.489	5.5	4	344
25	369.818	218.415	5.5	4	359
26	369.782	218.427	5.5	4	374
27	369.074	218.535	5.5	4	389
28	368.828	218.503	5.5	4	405
29	368.683	218.66	5.5	4	421
30	368.85	218.354	5.5	4	437
31	369.288	217.973	5.5	4	453
32	369.278	217.893	5.5	4	470
33	368.995	217.955	5.5	4	485
34	368.584	217.989	5.5	4	500
35	368.085	217.805	5.5	4	516
36	368.347	218.059	5.5	4	531
37	368.561	217.855	5.5	4	547
38	368.614	217.529	5.5	4	563
39	368.584	217.359	5.5	4	579
40	367.989	217.197	5.5	4	595
41	367.587	217.206	5.5	4	611
42	367.721	217.383	5.5	4	625
43	368.126	217.554	5.5	4	640
44	368.37	217.455	5.5	4	656
45	368.032	216.902	5.5	4	672
46	368.102	217.518	5.5	4	688
47	367.905	217.52	5.5	4	704
48	367.574	217.594	5.5	4	720
49	367.766	217.738	5.5	4	736
50	367.88	217.414	5.5	4	752
51	367.945	217.037	5.5	4	768
52	367.854	216.482	5.5	4	783
53	367.797	216.806	5.5	4	798
54	367.547	216.845	5.5	4	812
55	367.279	217.222	5.5	4	826
56	368.061	217.593	5.5	4	840
57	368.059	217.377	5.5	4	854
59	368.757	217.824	5.5	4	881
60	368.459	218.408	5.5	4	895
61	368.784	218.869	5.5	4	909
62	368.528	218.907	5.5	4	923
63	368.79	218.977	5.5	4	937
64	369.358	218.866	5.5	4	951
65	369.564	218.658	5.5	4	966
66	369.261	218.195	5.5	4	981
67	369.001	218.821	5.5	4	996
68	368.735	219.061	5.5	4	1011
69	368.46	218.889	5.5	4	1026
70	368.455	218.647	5.5	4	1041
71	368.75	218.304	5.5	4	1057
72	368.671	217.891	5.5	4	1073
73	368.554	217.946	5.5	4	1089
74	368.701	218.267	5.5	4	1105
75	368.212	218.181	5.5	4	1121
76	368.319	218.407	5.5	4	1136
77	368.25	217.849	5.5	4	1152
79	368.511	216.995	5.5	4	1184
80	368.53	217.649	5.5	4	1200
81	368.057	217.396	5.5	4	1216
82	367.956	217.65	5.5	4	1232
83	368.329	217.824	5.5	4	1248
84	368.522	217.645	5.5	4	1264
85	368.695	217.339	5.5	4	1280
86	369.413	217.751	5.5	4	1296
87	368.052	217.655	5.5	4	1312
88	368.193	218.012	5.5	4	1328
89	368.092	217.794	5.5	4	1344
90	368.415	217.852	5.5	4	1360
91	368.813	217.646	5.5	4	1376
92	368.951	217.089	5.5	4	1391
93	368.948	216.84	5.5	4	1407
94	368.381	216.553	5.5	4	1423
95	369.146	217.467	5.5	4	1439
96	369.37	217.781	5.5	4	1453
97	369.64	217.799	5.5	4	1468
99	370.258	217.959	7.0978	4	1499
100	370.175	218.342	5.5	4	1516
101	370.122	218.517	5.5	4	1533
102	369.671	218.698	5.5	4	1550
103	370.227	219.036	5.5	4	1567
104	370.588	218.899	7.54153	4	1582
106	370.202	218.114	6.9458	4	1614
107	370.475	218.573	5.5	4	1631
108	370.392	218.89	5.5	4	1648
109	370.125	218.696	5.5	4	1665
110	369.93	218.475	5.5	4	1682
112	370.312	218.234	5.5	4	1715
113	370.447	217.943	6.89756	4	1732
114	369.789	217.55	5.5	4	1749
115	369.514	217.992	5.5	4	1766
116	369.462	218.316	5.5	4	1783
117	369.556	218.028	5.5	4	1800
118	369.901	217.844	5.5	4	1817
120	370.857	217.749	7.31261	4	1849
121	369.71	217.746	5.5	4	1866
122	369.479	217.736	5.5	4	1882
123	369.268	217.912	5.5	4	1898
125	369.716	217.465	5.5	4	1932
126	369.894	217.464	5.5	4	1949
127	369.677	217.376	5.5	4	1967
128	369.31	217.363	5.5	4	1985
129	369.02	217.042	5.5	4	2003
130	369.42	217.323	5.5	4	2021
131	369.44	217.174	5.5	4	2039
133	369.486	216.9	6.90516	4	2073
134	369.727	217.287	5.5	4	2091
135	369.464	217.537	5.5	4	2109
136	369.423	217.88	5.5	4	2125
137	369.606	217.935	6.98203	4	2142
1	199.659	280.044	5.5	5	4
2	199.617	280.248	5.5	5	18
3	199.557	279.897	5.5	5	33
4	199.489	279.807	5.5	5	48
5	199.62	279.816	5.5	5	63
6	199.74	279.875	5.5	5	77
7	199.795	279.85	5.5	5	92
8	199.489	279.949	5.5	5	107
9	199.267	279.912	5.5	5	121
10	199.306	279.613	5.5	5	137
11	199.364	279.702	5.5	5	151
12	199.733	279.957	5.5	5	167
13	199.858	280.173	5.5	5	181
14	199.802	280.342	7.06516	5	196
15	199.952	280.458	5.5	5	210
16	199.805	280.435	5.5	5	225
17	200.071	280.672	5.5	5	240
18	200.335	280.912	5.5	5	255
19	200.516	280.909	6.90677	5	270
20	200.661	280.999	7.22391	5	285
21	200.736	281.286	7.17064	5	300
22	200.562	281.687	5.5	5	315
23	200.524	281.582	5.5	5	330
24	200.602	281.446	5.5	5	345
25	200.628	281.474	5.5	5	360
26	200.615	281.32	6.83157	5	375
27	200.574	281.198	7.07776	5	390
28	200.425	281.325	5.5	5	406
29	200.19	281.323	5.5	5	422
30	200.134	281.114	5.5	5	438
31	200.115	281.019	5.5	5	454
32	200.222	280.895	5.5	5	471
33	200.217	280.572	6.83547	5	486
34	200.221	280.861	6.90386	5	502
35	199.966	280.685	5.5	5	517
36	199.781	280.729	5.5	5	532
37	199.758	280.43	5.5	5	548
38	199.777	280.016	5.5	5	564
39	199.977	280.662	5.5	5	580
40	200.305	281.519	5.5	5	596
41	200.971	283.874	5.5	5	612
42	204.629	283.935	5.5	5	626
43	205.124	282.368	5.5	5	641
44	205.105	282.527	5.5	5	657
45	206.025	280.1	5.5	5	673
46	204.99	283.157	5.5	5	689
47	204.921	283.144	5.5	5	705
48	204.881	282.7	5.5	5	721
49	204.787	282.25	5.5	5	737
50	204.839	281.836	5.5	5	753
51	205.123	281.559	5.5	5	769
52	205.559	280.687	5.5	5	784
1	139.68	259.273	9.18479	6	5
2	139.167	259.388	9.15706	6	19
3	136.859	259.592	8.27837	6	34
4	140.847	259.057	9.62648	6	49
5	136.417	259.434	8.95085	6	64
6	140.519	259.002	9.71612	6	78
7	136.571	259.371	9.33356	6	93
8	136.206	259.705	8.29984	6	108
9	136.118	259.746	8.70807	6	122
10	135.849	259.436	8.57692	6	138
11	135.842	259.411	8.69677	6	152
12	135.468	259.901	8.80661	6	168
13	136.025	260.195	9.10615	6	182
14	136.401	260.251	9.23776	6	195
15	140.958	259.791	10.397	6	211
16	135.988	260.328	9.03784	6	226
17	140.765	260.396	10.1981	6	241
18	141.044	260.358	10.5429	6	256
19	141.679	260.385	10.659	6	271
20	141.27	260.754	10.4818	6	286
21	141.019	261.185	10.345	6	301
22	137.131	261.538	9.5544	6	316
23	137.111	261.495	9.3983	6	331
24	136.88	261.387	9.48436	6	346
25	137.073	261.39	9.77809	6	361
26	141.848	260.961	10.5297	6	376
27	141.028	260.887	10.3149	6	391
28	137.318	261.13	9.61075	6	407
29	137.03	261.164	9.04105	6	423
30	136.664	260.755	9.16188	6	439
31	136.454	260.628	9.24465	6	455
32	136.816	260.759	9.32956	6	472
33	141.057	260.394	10.2516	6	487
34	137.152	260.434	9.65249	6	501
35	136.571	260.834	9.56771	6	518
36	136.689	260.6	9.20364	6	533
37	136.291	260.526	9.23032	6	549
38	136.34	260.15	9.5472	6	565
39	136.232	260.197	9.57867	6	581
40	136.19	260.208	9.70571	6	597
41	140.664	259.924	10.7961	6	613
42	140.879	259.715	10.7509	6	627
43	135.974	260.282	9.82611	6	642
44	135.949	259.919	9.75869	6	658
45	136.224	259.96	9.84956	6	674
46	140.658	259.899	10.8557	6	690
47	140.26	259.762	10.7873	6	706
48	139.801	259.436	10.672	6	722
49	139.862	259.546	10.7917	6	738
50	139.731	259.225	10.8365	6	754
51	139.115	259.189	10.7393	6	770
52	139.478	259.223	11.0366	6	785
53	140.156	259.354	11.2062	6	799
54	140.29	259.63	11.3918	6	813
55	140.274	259.769	11.4887	6	827
56	140.723	260.158	11.5542	6	841
57	141.478	260.2	11.5637	6	855
58	140.892	260.533	11.6824	6	868
59	142.15	260.57	11.9491	6	882
60	140.84	261.006	11.5758	6	896
61	140.832	261.108	11.5435	6	910
62	141.257	261.291	11.6242	6	924
63	141.88	261.479	11.6957	6	938
64	142.804	261.297	11.9575	6	952
65	142.052	261.425	11.6933	6	967
66	141.811	261.188	11.6074	6	982
67	141.452	261.392	11.4471	6	997
68	141.613	261.183	11.4065	6	1012
69	142.067	261.428	11.2541	6	1027
70	142.172	261.851	11.1934	6	1042
71	141.847	261.323	11.1027	6	1058
72	141.279	261.124	11.0532	6	1074
73	140.699	261.005	11.029	6	1090
74	140.495	261.039	10.9722	6	1106
75	140.256	260.936	10.9534	6	1122
76	141.044	260.746	11.2808	6	1137
77	141.023	260.309	11.3264	6	1153
78	141.106	260.306	11.3512	6	1168
79	140.805	260.305	11.5259	6	1185
80	140.191	260.363	11.3003	6	1201
81	140.607	260.448	11.2153	6	1217
82	140.381	260.453	11.1735	6	1233
83	140.364	260.522	11.0638	6	1249
84	140.616	260.348	11.0146	6	1265
85	139.982	260.38	11.4293	6	1281
86	141.587	259.681	11.7762	6	1297
87	140.112	260.2	11.3318	6	1313
88	140.604	260.018	11.3942	6	1329
89	139.952	260.103	11.2005	6	1345
90	140.855	260.158	11.4636	6	1361
91	141.113	259.868	11.3529	6	1377
92	141.468	259.619	11.4902	6	1392
93	142.886	259.445	11.9753	6	1408
94	142.311	259.684	11.8851	6	1424
95	142.174	259.528	12.1055	6	1440
96	142.285	259.891	12.0868	6	1454
97	142.938	260.216	12.1443	6	1469
98	143.532	260.197	12.1313	6	1484
99	144.069	260.11	12.2993	6	1500
100	143.546	260.789	12.1101	6	1517
101	142.798	261.029	12.0904	6	1534
102	143.11	261.254	12.0894	6	1551
103	143.815	261.296	12.2285	6	1568
104	143.95	261.402	12.1326	6	1583
105	144.603	261.355	12.0769	6	1598
106	144.319	261.316	12.1152	6	1615
107	143.301	261.634	11.9162	6	1632
108	143.06	261.521	12.0314	6	1649
109	143.328	261.189	12.0118	6	1666
110	143.591	261.263	11.9651	6	1683
111	144.009	261.349	12.0019	6	1699
112	143.99	260.615	12.0917	6	1716
113	143.685	260.014	12.1362	6	1733
114	142.98	260.27	12.1308	6	1750
115	141.188	260.866	11.5541	6	1767
116	141.819	260.656	11.4819	6	1784
117	143.607	260.095	11.9037	6	1801
118	143.368	260.282	11.828	6	1818
119	143.553	260.027	12.0265	6	1834
120	143.239	259.948	12.1746	6	1850
121	142.329	259.869	11.9777	6	1867
122	142.469	260.062	12.0323	6	1883
123	143.14	260.159	12.031	6	1899
124	142.749	259.821	11.9886	6	1915
125	143.343	259.59	12.0296	6	1933
126	143.009	259.661	12.0799	6	1950
127	142.528	259.656	12.0678	6	1968
128	142.139	259.513	11.9694	6	1987
129	142.61	259.375	12.2114	6	2005
130	142.706	259.572	12.3025	6	2023
131	142.807	259.534	12.1144	6	2041
132	142.681	259.311	12.224	6	2058
133	143.075	259.394	12.4112	6	2075
134	142.508	259.605	12.3595	6	2093
135	141.966	259.955	12.3503	6	2111
136	142.111	260.028	12.3359	6	2127
137	143.088	260.021	12.5928	6	2144
138	142.843	260.215	12.7265	6	2160
139	142.88	260.066	12.4954	6	2176
140	143.46	260.043	12.6691	6	2192
141	142.824	260.481	12.7598	6	2208
142	142.653	261.223	12.6532	6	2224
143	142.878	261.347	12.6575	6	2240
144	143.12	261.382	12.5327	6	2255
145	143.858	261.251	12.6813	6	2271
146	143.607	261.227	12.6754	6	2287
147	142.992	261.018	12.721	6	2304
148	142.948	260.823	12.6806	6	2321
149	143.113	260.619	12.7469	6	2336
150	142.766	260.77	12.6429	6	2353
151	142.887	260.505	12.5796	6	2369
152	142.984	260.54	12.382	6	2386
153	143.036	260.495	12.5216	6	2403
154	142.848	260.278	12.476	6	2421
155	142.692	260.341	12.5536	6	2439
156	142.355	260.469	12.4395	6	2457
157	142.117	260.66	12.4775	6	2475
158	142.403	260.286	12.414	6	2491
159	142.03	260.238	12.5069	6	2507
160	142.436	260.014	12.7047	6	2525
161	142.303	259.622	12.6643	6	2542
162	141.709	259.735	12.6366	6	2559
163	141.606	259.909	12.53	6	2576
164	141.817	260.055	12.5024	6	2593
165	141.251	259.992	12.3771	6	2610
166	140.995	260.037	12.3718	6	2627
167	140.659	260.008	12.5148	6	2644
168	141.054	259.827	12.5897	6	2661
169	140.686	259.709	12.5456	6	2678
170	141.087	259.745	12.6672	6	2695
171	140.878	259.869	12.5772	6	2712
172	140.778	259.793	12.559	6	2728
173	141.323	259.72	12.7346	6	2745
174	141.627	259.854	12.7482	6	2762
175	141.645	260.302	12.8624	6	2778
176	141.838	260.453	12.7968	6	2795
177	141.774	260.53	12.8585	6	2812
178	142.057	260.77	13.0079	6	2829
179	142.091	260.79	13.0105	6	2846
180	141.894	260.959	13.0447	6	2863
181	141.926	261.165	13.203	6	2880
182	142.012	261.208	13.118	6	2897
183	142.675	261.531	13.1327	6	2914
184	142.8	261.526	13.2133	6	2930
185	142.446	261.532	13.0216	6	2946
186	142.152	261.136	13.0551	6	2962
187	142.052	260.948	13.122	6	2977
188	142.004	261.078	12.9506	6	2992
189	142.368	260.832	12.8259	6	3007
190	142.419	260.785	12.7924	6	3022
191	142.089	260.892	12.7871	6	3037
192	141.207	260.664	12.7449	6	3052
193	140.788	260.648	12.6835	6	3067
194	141.584	260.61	12.7725	6	3082
195	141.434	260.208	12.6816	6	3097
196	141.739	259.914	12.9194	6	3112
197	141.617	259.928	12.6204	6	3127
198	141.706	260.069	12.8661	6	3142
199	141.294	259.857	12.8965	6	3157
200	141.495	259.572	12.9523	6	3172
201	141.44	259.532	13.0367	6	3187
202	141.226	259.449	12.9119	6	3202
203	141.341	259.589	12.8408	6	3217
204	141.378	259.512	12.6755	6	3232
205	141.504	259.694	12.8339	6	3247
206	141.397	259.748	12.8302	6	3262
207	141.338	259.407	12.8343	6	3277
208	142.053	259.271	12.9955	6	3292
209	141.893	259.326	13.0271	6	3307
210	141.785	259.374	13.0691	6	3322
211	142.018	259.669	12.9453	6	3337
212	141.931	259.606	12.8952	6	3352
213	141.367	259.626	12.961	6	3367
214	141.449	259.763	13.0209	6	3382
215	141.657	259.916	13.1815	6	3397
216	142.039	260.333	13.2743	6	3412
217	142.296	260.442	13.374	6	3428
218	142.59	260.612	13.5242	6	3444
219	142.363	260.961	13.5765	6	3460
220	142.252	260.667	13.4574	6	3477
221	142.69	260.531	13.5925	6	3494
222	143.112	261.084	13.5495	6	3510
223	143.636	261.302	13.6154	6	3527
224	143.662	261.449	13.6846	6	3543
225	143.693	261.143	13.6576	6	3560
226	142.953	261.093	13.5397	6	3577
227	142.517	261.05	13.4808	6	3594
228	142.939	261.223	13.5593	6	3611
229	142.426	261.275	13.5524	6	3627
230	142.675	261.164	13.6727	6	3643
231	142.971	261.011	13.5078	6	3659
232	143.158	260.716	13.423	6	3674
233	142.231	260.551	13.3689	6	3689
234	142.21	260.413	13.3899	6	3704
235	141.985	260.228	13.4733	6	3719
236	142.364	260.065	13.5825	6	3734
237	142.415	260.199	13.6795	6	3749
238	142.053	260.236	13.7134	6	3764
239	141.738	259.869	13.681	6	3779
240	141.429	259.972	13.5955	6	3793
241	141.568	259.719	13.5494	6	3808
1	381.733	377.324	5.5	7	6
2	378.963	370.96	5.5	7	20
3	380.532	374.878	5.5	7	36
4	380.928	375.19	5.5	7	50
5	382.512	377.98	5.5	7	65
6	381.961	377.029	5.5	7	79
7	380.958	375.678	5.5	7	94
8	382.111	376.771	5.5	7	109
9	382.965	377.912	5.5	7	124
10	382.641	377.726	5.5	7	140
11	380.056	373.325	5.5	7	153
12	379.758	372.164	5.5	7	169
14	381.843	364.749	8.67118	7	200
15	381.658	361.9	8.98933	7	215
16	381.316	360.886	9.13961	7	230
17	381.524	361.292	9.40862	7	245
18	381.305	361.284	9.69199	7	260
19	381.638	361.3	9.94775	7	275
20	381.846	361.255	9.95407	7	290
21	381.856	361.677	10.0102	7	305
22	381.677	362.148	10.05	7	320
23	381.41	362.234	10.0191	7	335
24	381.401	362.499	10.0682	7	350
25	381.432	362.291	9.89297	7	365
26	381.473	362.156	9.90891	7	380
27	381.616	362.138	9.6068	7	395
28	381.303	362.519	9.50206	7	411
29	381.042	362.517	9.32429	7	427
30	380.884	362.892	9.11147	7	443
31	380.82	362.998	8.95757	7	459
32	380.477	364.245	8.67495	7	476
33	380.473	366.795	8.40206	7	491
34	380.216	367.484	8.00582	7	506
35	379.582	366.613	8.11658	7	523
36	379.513	367.356	8.11846	7	538
37	379.375	368.363	7.36743	7	554
38	379.351	369.651	5.5	7	567
39	378.929	370.002	5.5	7	583
40	378.454	366.887	5.5	7	599
41	379.152	362.251	5.5	7	615
42	380.659	361.043	5.5	7	629
43	382.139	355.909	5.5	7	644
44	382.404	356.042	5.5	7	660
45	382.114	356.309	5.5	7	676
46	380.827	357.893	5.5	7	692
47	380.724	357.831	5.5	7	708
48	379.252	358.4	5.5	7	724
49	376.123	362.672	5.5	7	740
50	375.898	363.765	5.5	7	756
51	375.914	363.487	5.5	7	772
52	376.275	364.01	5.5	7	786
53	376.485	364.179	5.5	7	800
54	377.346	363.828	5.5	7	814
55	377.508	364.695	5.5	7	828
56	377.634	365.885	5.5	7	842
57	376.856	365.548	6.77185	7	860
58	373.69	362.041	5.5	7	869
59	372.223	358.774	5.5	7	883
60	372.787	360.646	5.5	7	897
61	376.329	365.977	7.01766	7	914
62	376.401	366.945	7.2844	7	928
63	376.005	366.648	7.68656	7	942
64	376.481	367.224	8.17718	7	956
65	377.979	368.046	6.79192	7	971
66	378.151	362.471	5.5	7	983
67	378.71	363.09	5.5	7	998
68	378.357	364.427	5.5	7	1013
69	378.152	365.261	5.5	7	1028
70	378.363	366.018	5.5	7	1043
71	378.699	366.357	5.5	7	1059
72	378.083	366.897	5.5	7	1075
73	378.601	366.206	7.34248	7	1095
74	378.944	366.865	7.39084	7	1111
75	379.022	367.028	7.83477	7	1126
76	379.051	367.607	7.11172	7	1142
77	378.549	364.622	5.5	7	1154
78	378.295	364.802	5.5	7	1170
79	377.919	365.385	5.5	7	1187
80	377.495	366.892	5.5	7	1203
81	377.418	367.4	5.5	7	1219
82	377.632	366.058	5.5	7	1235
83	378.965	366.049	7.56169	7	1254
84	379.008	366.069	8.17147	7	1271
85	379.069	365.561	8.21576	7	1286
86	378.611	365.29	8.43865	7	1302
87	377.813	365.334	8.14313	7	1318
88	377.614	365.41	7.9925	7	1334
89	376.241	365.19	7.84029	7	1350
90	376.853	364.688	5.5	7	1363
91	376.678	362.965	5.5	7	1378
92	377.459	363.491	5.5	7	1394
93	377.658	365.441	5.5	7	1410
94	377.565	366.065	5.5	7	1426
95	378.121	366.533	5.5	7	1442
96	378.644	366.938	5.5	7	1456
97	379.858	367.15	7.92303	7	1474
98	379.941	365.919	8.72776	7	1489
99	379.458	366.21	8.85462	7	1505
100	379.285	366.404	8.96666	7	1522
101	379.629	366.97	8.58562	7	1539
102	379.76	368.303	8.62663	7	1556
103	379.65	365.432	5.5	7	1569
104	379.781	363.111	5.5	7	1584
105	379.852	363.834	5.5	7	1599
106	379.558	365.017	5.5	7	1616
107	379.367	365.788	5.5	7	1633
108	379.117	366.783	5.5	7	1650
109	379.296	367.266	5.5	7	1667
110	379.54	367.602	5.5	7	1684
111	379.664	366.802	5.5	7	1700
112	379.489	364.233	5.5	7	1717
113	379.458	366.199	5.5	7	1734
114	379.557	366.915	5.5	7	1751
115	379.128	367.42	5.5	7	1768
116	379.039	367.908	5.5	7	1785
117	378.986	368.205	5.5	7	1802
118	379.426	368.017	5.5	7	1819
119	378.801	368.084	5.5	7	1835
120	379.793	368.509	7.1803	7	1854
121	378.27	367.14	5.5	7	1868
122	378.327	365.802	5.5	7	1884
123	378.467	366.137	5.5	7	1900
124	378.618	367.054	5.5	7	1917
125	378.873	367.301	5.5	7	1935
126	378.84	368.383	5.5	7	1952
127	378.779	368.971	5.5	7	1970
128	378.558	369.158	5.5	7	1988
129	378.032	368.018	6.83306	7	2009
130	378.402	366.217	9.00422	7	2027
131	379.781	366.421	9.58675	7	2046
132	379.564	366.873	9.07983	7	2061
133	379.726	367.429	8.67751	7	2079
134	380.907	368.793	9.55797	7	2098
135	380.804	369.716	9.25489	7	2116
136	379.774	370.031	8.40387	7	2131
137	380.894	370.79	9.58486	7	2149
138	381.142	371.864	8.76945	7	2164
139	381.798	373.105	8.28884	7	2180
140	381.644	372.452	7.97598	7	2196
141	379.743	370.495	5.5	7	2209
142	378.999	369.797	5.5	7	2225
143	380.757	371.607	7.53724	7	2242
144	381.088	372.52	7.22886	7	2257
145	381.876	373.687	7.46701	7	2273
146	382.667	375.464	7.97005	7	2291
147	383.754	378.97	7.89643	7	2308
1	390.476	409.615	5.5	8	7
2	390.412	409.424	5.5	8	21
3	390.233	409.024	5.5	8	37
4	390.269	409.041	5.5	8	51
5	389.862	408.774	5.5	8	66
6	389.411	407.97	5.5	8	80
7	389.456	407.761	5.5	8	95
8	389.666	407.826	5.5	8	110
9	389.653	407.62	5.5	8	125
10	389.707	407.767	5.5	8	141
11	389.04	408.029	5.5	8	154
12	388.915	408.218	5.5	8	170
13	388.752	408.371	5.5	8	183
14	388.312	408.427	5.5	8	197
15	388.663	408.309	5.5	8	212
16	389.086	408.544	5.5	8	227
17	389.285	408.437	5.5	8	242
18	388.954	408.711	5.5	8	257
19	388.956	408.87	5.5	8	272
20	388.952	408.763	5.5	8	287
21	389.395	408.848	5.5	8	302
22	389.51	408.85	5.5	8	317
23	389.847	408.688	5.5	8	332
24	389.538	408.623	5.5	8	347
25	389.112	408.595	5.5	8	362
26	388.843	408.482	5.5	8	377
27	389.45	408.421	5.5	8	392
28	389.503	408.299	5.5	8	408
29	388.932	407.215	5.5	8	424
30	388.636	406.272	5.5	8	440
31	387.679	404.729	5.5	8	456
32	387.246	404.81	5.5	8	473
33	386.661	403.206	5.5	8	488
34	384.773	400.581	5.5	8	503
35	384.893	400.48	5.5	8	520
36	387.273	403.698	5.5	8	535
37	387.964	404.382	5.5	8	551
38	387.75	405.572	5.5	8	568
39	387.846	406.645	5.5	8	584
40	386.484	404.027	5.5	8	600
41	383.974	399.425	5.5	8	616
42	383.717	399.413	5.5	8	630
43	382.778	398.818	5.5	8	646
44	382.468	398.527	5.5	8	662
45	381.899	398.264	5.5	8	678
46	381.015	397.674	5.5	8	694
47	380.847	397.507	5.5	8	710
48	380.612	397.193	5.5	8	726
49	380.728	397.239	5.5	8	742
50	380.719	397.118	5.5	8	758
51	380.761	397.348	5.5	8	774
52	380.583	397.19	5.5	8	788
53	380.173	396.762	5.5	8	802
54	380.72	397.248	5.5	8	816
55	380.78	397.436	5.5	8	830
56	380.986	397.648	5.5	8	844
57	381.321	397.737	5.5	8	857
58	381.447	398.218	5.5	8	871
59	381.283	398.404	5.5	8	885
60	380.992	398.202	5.5	8	899
61	381.217	398.464	5.5	8	912
62	381.158	398.615	5.5	8	926
63	381.046	398.552	5.5	8	940
64	381.747	398.557	5.5	8	954
65	381.462	398.834	5.5	8	969
66	381.387	398.335	5.5	8	985
67	381.484	398.191	5.5	8	1000
68	381.408	397.902	5.5	8	1014
69	381.259	397.912	5.5	8	1029
70	381.309	397.771	5.5	8	1045
71	381.226	397.785	5.5	8	1061
72	380.591	397.688	5.5	8	1077
73	380.37	397.275	5.5	8	1092
74	380.227	396.866	5.5	8	1108
75	380.117	396.623	5.5	8	1124
76	380.272	396.598	5.5	8	1139
77	380.657	396.439	5.5	8	1156
78	380.299	396.388	5.5	8	1172
79	380.387	396.286	5.5	8	1189
80	379.955	396.212	5.5	8	1205
81	379.856	396.129	5.5	8	1221
82	380.124	395.915	5.5	8	1237
83	380.381	395.868	5.5	8	1252
84	380.665	395.914	5.5	8	1268
85	380.348	395.982	5.5	8	1284
86	379.829	395.564	5.5	8	1300
87	379.553	395.162	5.5	8	1316
88	379.714	395.058	5.5	8	1332
89	379.913	395.12	5.5	8	1348
90	380.461	395.181	5.5	8	1365
91	380.852	395.219	5.5	8	1380
92	380.912	395.074	5.5	8	1396
93	380.846	394.954	5.5	8	1412
94	380.803	395.027	5.5	8	1428
95	381.159	395.035	5.5	8	1443
96	381.34	395.489	5.5	8	1458
97	381.553	395.692	5.5	8	1472
98	381.74	395.969	5.5	8	1487
99	381.505	396.053	5.5	8	1503
100	381.43	395.96	5.5	8	1520
101	381.475	396.2	5.5	8	1537
102	381.851	396.532	5.5	8	1554
103	382.137	396.76	5.5	8	1571
104	382.317	396.775	5.5	8	1586
105	382.438	397.199	5.5	8	1601
106	382.737	397.746	5.5	8	1618
107	382.291	397.418	5.5	8	1635
108	382.179	396.891	5.5	8	1652
109	382.346	396.571	5.5	8	1669
110	382.348	396.651	5.5	8	1686
111	382.402	396.356	5.5	8	1702
112	381.993	396.164	5.5	8	1719
113	381.631	396.233	5.5	8	1736
114	381.615	396.139	5.5	8	1753
115	381.556	396	5.5	8	1770
116	381.335	396.019	5.5	8	1787
117	381.129	395.893	5.5	8	1804
118	381.383	395.791	5.5	8	1821
119	381.091	395.752	5.5	8	1837
120	381.005	395.518	5.5	8	1852
121	380.845	395.31	5.5	8	1870
122	381.384	395.494	5.5	8	1886
123	381.404	395.839	5.5	8	1902
124	381.337	395.414	5.5	8	1919
125	380.855	395.476	5.5	8	1937
126	380.573	395.454	5.5	8	1954
127	380.724	395.406	5.5	8	1972
128	380.695	395.212	5.5	8	1990
129	380.931	394.995	5.5	8	2007
130	381.232	394.855	5.5	8	2025
131	381.396	394.51	5.5	8	2043
132	381.083	394.873	5.5	8	2059
133	381.002	394.981	5.5	8	2077
134	380.891	394.73	5.5	8	2094
135	380.673	394.77	5.5	8	2112
136	380.808	394.933	5.5	8	2129
137	380.934	395.193	5.5	8	2145
138	381.658	394.625	5.5	8	2162
139	382.218	393.615	5.5	8	2178
140	382.605	393.154	5.5	8	2194
141	383.342	391.746	7.67338	8	2212
142	382.899	393.131	7.56859	8	2228
143	383.155	393.843	7.8355	8	2244
144	383.44	393.822	7.62789	8	2259
145	383.181	394.889	7.39687	8	2275
146	382.866	395.197	5.5	8	2288
147	382.674	394.655	5.5	8	2306
148	382.921	393.758	7.01496	8	2324
149	383.193	392.724	7.30395	8	2339
150	383.33	392.53	7.4707	8	2356
151	383.802	390.833	7.37406	8	2372
152	383.773	385.411	7.14373	8	2388
153	384.056	388.597	7.07832	8	2406
154	384.586	385.415	7.38358	8	2424
155	384.717	382.675	7.75288	8	2442
156	384.853	381.485	7.93627	8	2460
157	384.781	380.462	7.5785	8	2477
158	384.725	379.836	7.42787	8	2493
159	385.123	380.301	7.68012	8	2510
160	385.549	381.255	7.7528	8	2528
161	385.556	381.185	7.76545	8	2545
162	386.477	381.615	7.59137	8	2562
163	386.714	381.305	7.88236	8	2579
164	386.338	381.072	7.75293	8	2596
165	386.646	380.997	7.50473	8	2613
166	386.728	380.981	7.91183	8	2630
167	386.637	380.976	7.88312	8	2647
168	386.89	380.595	8.15042	8	2664
169	386.953	380.303	7.83177	8	2681
170	388.205	380.431	7.53621	8	2698
171	387.609	380.139	7.77692	8	2715
172	390.409	380.794	7.24896	8	2731
173	389.475	380.932	7.81017	8	2748
174	392.137	381.709	7.76042	8	2764
175	392.45	381.864	7.78977	8	2781
176	392.363	382.182	7.85713	8	2798
177	393.302	382.333	7.94978	8	2815
178	392.876	382.239	8.32835	8	2832
179	394.159	382.56	8.41321	8	2849
180	394.451	382.802	8.38895	8	2866
181	394.157	382.807	8.55178	8	2883
182	393.48	383.168	8.71813	8	2900
183	393.952	383.097	8.78588	8	2917
184	394.301	383.164	8.72484	8	2933
185	394.565	383.181	8.45832	8	2949
186	394.67	383.136	8.34779	8	2965
187	395.061	383.148	8.35255	8	2980
188	394.442	383.32	8.42961	8	2995
189	394.006	382.794	8.21453	8	3010
190	394.184	382.986	8.01269	8	3025
191	394.49	382.873	8.00544	8	3040
192	394.454	382.967	7.69931	8	3055
193	394.926	383.013	7.89169	8	3070
194	394.881	382.66	7.78589	8	3085
195	394.367	382.096	5.5	8	3099
196	394.971	381.767	7.2589	8	3115
197	395.467	381.886	7.2422	8	3129
198	395.36	382.112	7.80898	8	3144
199	395.299	382.123	7.61277	8	3159
200	395.51	381.889	8.00719	8	3174
201	395.633	381.626	7.81155	8	3189
202	395.558	381.458	7.87281	8	3205
203	396.58	381.616	7.73125	8	3220
204	396.909	381.697	7.62404	8	3235
205	397.36	381.311	7.70812	8	3250
206	397.592	381.433	7.71498	8	3265
207	397.776	381.282	7.67668	8	3280
208	397.621	380.995	8.037	8	3295
209	397.828	380.484	7.75589	8	3310
210	397.811	380.354	7.69586	8	3325
211	397.825	380.328	7.73692	8	3340
212	398.056	380.452	7.995	8	3355
213	398.183	380.739	8.21654	8	3370
214	398.355	381.061	8.80042	8	3385
215	398.357	381.372	8.87595	8	3400
216	398.373	381.151	8.79797	8	3415
217	398.764	381.082	8.80212	8	3431
218	398.689	380.935	9.19607	8	3447
219	398.823	380.972	9.04814	8	3462
220	398.969	381.665	8.96371	8	3480
221	400.067	383.355	9.74979	8	3497
222	399.725	383.727	9.90959	8	3513
223	399.672	383.648	9.94218	8	3530
224	399.821	383.391	9.68109	8	3546
225	399.606	382.739	9.62407	8	3563
226	399.554	382.557	9.48314	8	3580
227	399.659	382.599	9.44261	8	3597
228	399.557	383.066	9.37622	8	3613
229	399.367	382.71	9.1967	8	3630
230	399.122	382.448	9.29086	8	3646
231	399.233	382.188	8.84079	8	3661
232	399.238	382.013	8.88925	8	3677
233	399.23	381.772	8.83497	8	3692
234	399.074	381.53	8.55515	8	3707
235	398.791	381.461	8.81986	8	3721
236	398.751	381.772	8.74112	8	3736
237	398.839	381.237	8.96376	8	3751
238	398.853	381.049	9.02832	8	3767
239	398.846	381.123	9.18161	8	3782
240	398.847	381.267	9.27078	8	3796
241	398.65	381.236	9.07522	8	3811
1	384.225	455.735	5.5	9	8
2	384.174	455.18	5.5	9	22
3	385.269	456.939	5.5	9	38
4	383.827	455.031	5.5	9	52
5	383.595	454.609	5.5	9	67
6	384.301	455.479	5.5	9	81
7	383.713	455.163	5.5	9	96
8	384.159	455.674	5.5	9	111
9	383.423	454.637	5.5	9	126
10	383.59	455.238	5.5	9	142
11	383.845	455.426	5.5	9	155
12	384.129	455.357	5.5	9	171
13	385.086	457.128	5.5	9	184
14	384.249	456.203	5.5	9	198
15	384.639	456.06	5.5	9	213
16	384.74	456.587	5.5	9	228
17	384.265	456.208	5.5	9	243
18	384.262	455.954	5.5	9	258
19	384.79	456.561	5.5	9	273
20	384.893	456.721	5.5	9	288
21	386.031	458.49	5.5	9	303
22	385.066	457.05	5.5	9	318
23	385.472	457.925	5.5	9	333
24	385.156	457.159	5.5	9	348
25	385.135	457.271	5.5	9	363
26	386.196	458.855	5.5	9	378
27	387.054	459.794	5.5	9	393
28	387.524	460.222	5.5	9	409
29	384.531	456.631	5.5	9	425
30	384.749	457.104	5.5	9	441
31	384.59	456.82	5.5	9	457
32	384.788	456.981	5.5	9	474
33	384.903	457.213	5.5	9	489
34	384.633	456.826	5.5	9	504
35	384.81	457.003	5.5	9	521
36	384.631	456.929	5.5	9	536
37	389.908	459.281	5.5	9	552
38	391.253	458.332	5.5	9	569
39	387.529	459.228	5.5	9	585
40	384.851	457.222	5.5	9	601
41	384.071	455.979	5.5	9	617
42	384.11	455.885	5.5	9	631
43	383.944	456.092	5.5	9	647
44	384.384	456.593	5.5	9	663
45	385.626	458.192	5.5	9	679
46	385.774	458.376	5.5	9	695
47	386.793	458.686	5.5	9	711
48	385.364	458.085	5.5	9	727
49	383.833	455.723	5.5	9	743
50	383.949	455.97	5.5	9	759
51	383.861	455.771	5.5	9	775
52	383.838	455.516	5.5	9	789
53	384.258	456.2	5.5	9	803
54	383.788	455.59	5.5	9	817
55	383.957	455.858	5.5	9	831
56	383.801	455.758	5.5	9	845
57	383.953	456.061	5.5	9	858
58	384.002	456.366	5.5	9	872
59	384.67	456.858	5.5	9	886
60	384.749	457.169	5.5	9	900
61	384.393	457.002	5.5	9	913
62	384.366	456.654	5.5	9	927
63	384.632	457.126	5.5	9	941
64	384.396	456.795	5.5	9	955
65	384.495	456.872	5.5	9	970
66	384.835	457.029	5.5	9	986
67	384.673	456.835	5.5	9	1001
68	384.457	456.795	5.5	9	1015
69	384.605	456.859	5.5	9	1030
70	384.482	457.313	5.5	9	1046
71	386.695	459.686	5.5	9	1062
72	384.352	456.804	5.5	9	1078
73	386.084	459.046	5.5	9	1093
74	384.826	457.474	5.5	9	1109
75	384.136	456.339	5.5	9	1125
76	384.173	456.141	5.5	9	1140
77	383.846	456.032	5.5	9	1157
78	383.713	455.72	5.5	9	1173
79	384.967	457.098	5.5	9	1190
80	384.963	457.19	5.5	9	1206
81	386.133	458.741	5.5	9	1222
82	385.339	457.678	5.5	9	1238
83	383.997	456.243	5.5	9	1253
84	383.891	456.092	5.5	9	1269
85	384.479	456.631	5.5	9	1285
86	384.278	456.193	5.5	9	1301
87	384.687	456.836	5.5	9	1317
88	384.576	456.589	5.5	9	1333
89	384.611	456.222	5.5	9	1349
90	388.9	459.032	5.5	9	1366
91	391.953	457.571	5.5	9	1381
92	386.255	458.076	5.5	9	1397
93	385.1	456.349	5.5	9	1413
94	385.102	456.267	5.5	9	1429
95	385.3	456.244	5.5	9	1444
96	387.092	458.446	5.5	9	1459
97	387.877	459.363	5.5	9	1473
98	386.46	457.69	5.5	9	1488
99	387.139	458.62	5.5	9	1504
100	388.359	459.856	5.5	9	1521
101	388.255	460.089	5.5	9	1538
102	386.599	458.445	5.5	9	1555
103	385.447	456.862	5.5	9	1572
104	385.783	456.986	5.5	9	1587
105	386.276	457.488	5.5	9	1602
106	385.966	457.189	5.5	9	1619
107	386.286	457.732	5.5	9	1636
108	385.91	457.404	5.5	9	1653
109	387.051	458.753	5.5	9	1670
110	386.043	457.527	5.5	9	1687
111	385.336	456.769	5.5	9	1703
112	384.893	455.886	5.5	9	1720
113	385.495	456.209	5.5	9	1737
114	385.683	456.684	5.5	9	1754
115	385.611	456.688	5.5	9	1771
116	384.89	455.628	5.5	9	1788
117	384.891	456.027	5.5	9	1805
118	384.891	455.897	5.5	9	1822
119	384.952	455.528	5.5	9	1838
120	385.611	456.533	5.5	9	1853
121	385.487	456.442	5.5	9	1871
122	385.187	455.808	5.5	9	1887
123	384.789	455.423	5.5	9	1903
124	384.944	455.723	5.5	9	1920
125	385.643	456.413	5.5	9	1938
126	385.48	456.244	5.5	9	1955
127	386.085	457.15	5.5	9	1973
128	386.171	457.274	5.5	9	1991
129	384.716	455.047	5.5	9	2008
130	385.445	456.091	5.5	9	2026
131	385.232	455.814	5.5	9	2044
132	384.695	454.831	5.5	9	2060
133	384.884	455.219	5.5	9	2078
134	386.038	456.893	5.5	9	2095
135	384.973	455.694	5.5	9	2113
136	384.899	455.666	5.5	9	2130
137	385.185	455.876	5.5	9	2146
138	385.293	455.935	5.5	9	2163
139	385.12	455.462	5.5	9	2179
140	385.264	455.679	5.5	9	2195
141	386.249	457.077	5.5	9	2211
142	386.484	457.481	5.5	9	2226
143	386.414	457.357	5.5	9	2241
144	385.931	456.959	5.5	9	2256
145	388.467	459.862	5.5	9	2272
146	391.117	459.954	5.5	9	2289
147	387.695	459.276	5.5	9	2307
148	388.786	459.46	5.5	9	2323
149	386.362	456.94	5.5	9	2337
150	385.812	456.305	5.5	9	2354
151	385.72	456.294	5.5	9	2370
152	385.403	455.711	5.5	9	2387
153	385.41	455.937	5.5	9	2405
154	387.321	458.543	5.5	9	2423
155	386.01	456.676	5.5	9	2441
156	385.519	455.914	5.5	9	2459
157	386.062	456.919	5.5	9	2476
158	385.434	455.953	5.5	9	2492
159	387.584	458.545	5.5	9	2509
160	392.677	458.017	5.5	9	2527
161	385.631	456.015	5.5	9	2544
162	387.76	458.859	5.5	9	2561
163	385.282	455.478	5.5	9	2578
164	385.294	455.932	5.5	9	2595
165	384.681	455.255	5.5	9	2612
166	385.414	455.768	5.5	9	2629
167	385.039	455.287	5.5	9	2646
168	385.089	455.399	5.5	9	2663
169	387.025	457.385	5.5	9	2680
170	385.185	455.603	5.5	9	2697
171	385.85	456.253	5.5	9	2714
172	387.009	457.789	5.5	9	2730
173	386.266	456.422	5.5	9	2747
174	387.883	457.643	5.5	9	2763
175	385.974	456.544	5.5	9	2780
176	386.904	457.852	5.5	9	2796
177	386.056	457.073	5.5	9	2814
178	385.952	456.547	5.5	9	2831
179	385.833	456.368	5.5	9	2847
180	387.289	458.079	5.5	9	2864
181	386.466	456.728	5.5	9	2881
182	387.922	458.755	5.5	9	2899
183	386.485	456.721	5.5	9	2915
184	386.701	457.055	5.5	9	2931
185	386.589	457.063	5.5	9	2947
186	387.045	457.289	5.5	9	2964
187	387.143	457.424	5.5	9	2979
188	386.562	457.044	5.5	9	2994
189	386.294	456.737	5.5	9	3009
190	386.799	457.169	5.5	9	3024
191	386.52	456.87	5.5	9	3039
192	386.223	456.387	5.5	9	3054
193	386.115	456.331	5.5	9	3068
194	387.33	458.019	5.5	9	3083
195	403.557	449.69	5.5	9	3100
196	403.543	449.196	5.5	9	3114
197	403.346	449.047	6.84745	9	3130
198	403.349	449.561	6.78297	9	3145
199	403.29	449.435	7.27622	9	3160
200	403.393	449.029	7.56503	9	3175
201	403.446	448.801	7.61686	9	3190
202	386.215	455.826	5.5	9	3204
203	385.875	455.275	5.5	9	3219
204	386.782	456.69	5.5	9	3234
205	386.274	455.789	5.5	9	3249
206	385.955	455.324	5.5	9	3264
207	386.447	455.656	5.5	9	3279
208	386.695	456.171	5.5	9	3293
209	386.282	455.442	5.5	9	3309
210	386.568	455.944	5.5	9	3324
211	386.511	455.73	5.5	9	3339
212	386.189	455.355	5.5	9	3354
213	386.758	455.909	5.5	9	3369
214	386.889	456.034	5.5	9	3384
215	386.692	455.963	5.5	9	3398
216	386.585	455.854	5.5	9	3414
217	386.194	455.606	5.5	9	3430
218	386.769	455.871	5.5	9	3446
219	386.861	455.91	6.78573	9	3463
220	386.954	456.055	5.5	9	3478
221	387.127	456.254	5.5	9	3495
222	387.356	456.763	5.5	9	3511
223	387.316	456.536	5.5	9	3529
224	387.294	457.012	5.5	9	3545
225	386.933	456.498	5.5	9	3562
226	387.58	456.865	5.5	9	3579
227	387.729	456.885	5.5	9	3596
229	387.313	456.912	5.5	9	3629
230	388.37	458.545	5.5	9	3645
231	389.74	459.578	7.48716	9	3662
232	388.487	458.337	5.5	9	3676
233	387.582	457.008	5.5	9	3691
234	387.352	456.809	5.5	9	3706
235	387.935	457.424	6.86211	9	3722
236	389.523	459.027	7.28791	9	3737
237	387.95	457.545	6.77587	9	3752
238	387.288	456.412	5.5	9	3766
239	386.82	455.817	5.5	9	3781
240	387.07	456.102	5.5	9	3795
241	386.711	455.842	5.5	9	3810
1	403.466	336.707	6.79171	10	9
2	403.28	336.705	6.81285	10	23
3	403.313	336.529	5.5	10	35
4	403.189	336.356	6.92572	10	53
5	402.652	336.165	7.20541	10	68
6	402.617	336.249	7.0505	10	82
7	402.431	336.232	6.96545	10	97
8	402.687	336.338	6.92802	10	112
9	403.099	336.385	5.5	10	123
10	403.23	336.465	5.5	10	139
11	402.907	336.358	7.01577	10	156
12	402.628	335.804	7.4483	10	172
13	402.588	336.456	7.54772	10	185
14	402.516	336.599	7.57846	10	199
15	403.203	337.009	7.87807	10	214
16	403.497	336.917	7.16258	10	229
17	403.761	336.831	7.00502	10	244
18	403.767	337.142	7.46676	10	259
19	403.522	337.567	7.86293	10	274
20	403.717	337.815	7.91429	10	289
21	403.705	337.806	8.25569	10	304
22	404.035	338.082	8.27016	10	319
23	404.328	338.386	7.78177	10	334
24	404.174	337.93	7.56922	10	349
25	403.952	337.863	7.76211	10	364
26	403.486	337.739	7.71124	10	379
27	403.554	338.098	7.71594	10	394
28	403.69	338.257	7.69553	10	410
29	403.952	338.065	7.07731	10	426
30	404.149	338.294	7.17202	10	442
31	404.012	337.723	7.11719	10	458
32	403.608	337.759	7.16769	10	475
33	403.363	337.983	7.49284	10	490
34	403.214	337.61	7.48971	10	505
35	403.239	337.494	7.53229	10	522
36	403.761	337.467	7.08885	10	537
37	403.546	337.33	7.50663	10	553
38	403.29	337.013	7.43915	10	570
39	402.991	336.806	7.64275	10	586
40	402.863	337.05	7.98201	10	602
41	402.773	336.545	8.08646	10	618
42	402.941	336.762	8.11816	10	632
43	403.378	336.822	7.69734	10	648
44	403.35	336.623	7.9581	10	664
45	403.043	336.548	8.09145	10	680
46	402.749	336.735	8.40493	10	696
47	402.627	336.668	8.30651	10	712
48	402.39	336.392	8.35708	10	728
49	402.752	336.169	8.67897	10	744
50	402.787	336.015	8.23489	10	760
51	402.629	335.87	8.52996	10	776
52	402.463	335.841	8.89634	10	790
53	402.231	336.202	8.28559	10	804
54	402.351	336.009	9.34483	10	818
55	402.765	336.699	9.53863	10	832
56	403.185	337.056	9.32234	10	846
57	403.591	337.002	9.10452	10	859
58	403.586	337.373	9.48804	10	873
59	403.591	337.925	9.39346	10	887
60	402.943	337.818	9.49298	10	901
61	403.271	338.065	9.68128	10	915
62	403.751	338.571	9.60505	10	929
63	404.112	338.595	9.43549	10	943
64	404.456	338.497	9.25023	10	957
65	404.244	338.539	9.51839	10	972
66	403.832	338.305	9.51256	10	987
67	403.506	338.131	9.48374	10	1002
68	403.314	338.303	9.70783	10	1016
69	403.922	337.992	9.42229	10	1031
70	404	338.117	9.14511	10	1047
71	403.705	337.945	8.5354	10	1063
72	403.202	337.428	9.3761	10	1079
73	403.003	337.597	9.08905	10	1094
74	403.014	337.557	9.22802	10	1110
75	402.455	337.202	9.58134	10	1127
76	403.273	337.141	8.99086	10	1141
77	403.483	337.218	9.11946	10	1158
78	403.33	337.025	9.12915	10	1174
79	403	336.116	9.53396	10	1191
80	402.762	336.806	9.15595	10	1207
81	402.666	336.779	9.35771	10	1223
82	402.71	336.627	9.49456	10	1239
83	402.987	336.593	9.3551	10	1255
84	403.294	336.862	9.10911	10	1270
85	403.114	336.687	9.56985	10	1287
86	402.62	336.133	9.58794	10	1303
87	402.734	336.894	9.59307	10	1319
88	402.173	336.451	9.72835	10	1335
89	402.736	336.638	9.48672	10	1351
90	403.048	336.617	9.80234	10	1367
91	403.285	336.398	9.52627	10	1382
92	403.345	336.387	9.90319	10	1398
93	403.411	336.655	10.0815	10	1414
94	403.131	336.588	9.99107	10	1430
95	403.056	336.121	10.6041	10	1446
96	403.746	336.606	10.4087	10	1460
97	404.317	336.892	10.1099	10	1475
98	404.555	337.035	10.2333	10	1490
99	404.261	336.734	10.2785	10	1506
100	404.406	337.584	10.3364	10	1523
101	403.919	337.582	10.3262	10	1540
102	404.371	337.804	10.4135	10	1557
103	405.244	338.073	10.4721	10	1573
104	405.251	337.984	10.4451	10	1588
105	405.279	338.145	10.3798	10	1603
106	405.035	338.022	10.0288	10	1620
107	404.611	338.181	10.3188	10	1637
108	404.402	338.248	10.621	10	1654
109	404.396	338.364	10.345	10	1671
110	405.002	338.021	9.97313	10	1688
111	405.057	338.191	9.78286	10	1704
112	404.527	337.561	9.90919	10	1721
113	403.989	337.222	9.85401	10	1738
114	404.035	337.033	9.99867	10	1755
115	403.774	337.15	9.95613	10	1772
116	404.681	336.996	9.96404	10	1789
117	404.451	337.281	9.88711	10	1806
118	404.498	337.229	10.0645	10	1823
119	404.262	336.753	10.2797	10	1839
120	403.765	336.234	10.3666	10	1855
121	402.924	336.406	10.3152	10	1872
122	403.528	336.522	10.6438	10	1888
123	404.204	336.293	10.1391	10	1904
124	404.185	336.431	10.0721	10	1921
125	404.266	336.586	10.1417	10	1939
126	403.94	336.189	10.0552	10	1956
127	403.701	335.859	10.4096	10	1974
128	403.389	336.246	10.6594	10	1992
129	403.528	336.321	10.6966	10	2010
130	404.176	336.055	10.602	10	2028
131	404.201	336.281	10.2462	10	2045
132	404.326	336.31	10.6234	10	2063
133	404.163	336.44	10.6754	10	2080
134	403.906	336.117	11.0221	10	2097
135	403.816	336.679	11.2346	10	2115
136	404.065	337.103	11.199	10	2132
137	404.918	336.66	11.4322	10	2148
138	404.923	336.881	11.377	10	2165
139	404.717	336.789	11.0125	10	2181
140	404.868	336.819	11.0588	10	2197
141	404.705	337.259	11.5608	10	2213
142	404.634	337.677	11.6285	10	2229
143	404.754	337.671	11.6197	10	2245
144	405.297	338.135	11.569	10	2260
145	405.503	338.017	11.2686	10	2276
146	405.229	337.566	11.1969	10	2292
147	404.805	337.147	11.5338	10	2309
148	404.609	337.176	11.5491	10	2325
149	404.463	337.135	11.4727	10	2340
150	404.884	337.059	11.4132	10	2357
151	404.984	337.261	11.2759	10	2373
152	405.391	337.499	10.9885	10	2389
153	404.975	337.338	11.0654	10	2407
154	404.539	337.009	10.9575	10	2425
155	404.056	336.711	11.196	10	2443
156	404.194	337.156	11.1497	10	2461
157	404.689	336.721	11.1174	10	2478
158	404.885	336.785	10.9688	10	2494
159	404.644	336.31	10.9483	10	2511
160	404.343	336.144	11.2798	10	2529
161	403.955	335.775	11.25	10	2546
162	403.611	336.271	11.3332	10	2563
163	403.882	336.248	11.4876	10	2580
164	404.453	336.333	11.1805	10	2597
165	404.626	336.483	11.339	10	2614
166	404.644	336.257	11.236	10	2631
167	404.309	336.244	11.7672	10	2648
168	403.879	336.092	11.7945	10	2665
169	403.521	336.138	11.9511	10	2682
170	403.819	336.084	11.678	10	2699
171	404.44	336.384	11.475	10	2716
172	404.567	335.995	11.4977	10	2732
173	404.715	336.313	11.7124	10	2749
174	404.268	336.285	12.0561	10	2765
175	403.966	336.488	11.9075	10	2782
176	403.662	336.649	11.9534	10	2799
177	404.283	337.078	11.9432	10	2816
178	404.042	336.863	11.9335	10	2833
179	404.928	336.975	11.9086	10	2850
180	404.98	336.952	12.2077	10	2867
181	404.705	337.23	12.3317	10	2884
182	404.48	337.182	12.2137	10	2901
183	404.251	337.232	12.3423	10	2918
184	405.198	337.864	12.2065	10	2934
185	405.49	337.392	12.0713	10	2950
186	405.478	337.296	11.7476	10	2966
187	405.123	336.982	12.0532	10	2981
188	404.986	337.196	11.9696	10	2996
189	404.634	337.141	11.9713	10	3011
190	404.338	337.025	11.9132	10	3026
191	404.952	337.038	11.8115	10	3041
192	404.572	336.948	11.6999	10	3056
193	405.102	336.446	11.7668	10	3071
194	404.541	336.116	12.1559	10	3086
195	403.72	335.24	11.63	10	3101
196	403.996	335.617	11.8866	10	3116
197	405.017	335.825	11.6738	10	3131
198	404.328	336.102	11.8554	10	3146
199	404.474	335.831	12.0547	10	3161
200	404.736	334.895	12.0729	10	3176
201	404.182	335.317	12.2432	10	3191
202	403.533	334.916	12.1015	10	3206
203	403.618	334.617	11.9357	10	3221
204	404.308	335.596	11.9673	10	3236
205	404.756	335.711	12.0742	10	3251
206	404.548	335.4	12.1251	10	3266
207	404.662	334.993	12.2142	10	3281
208	404.036	334.939	12.0524	10	3296
209	403.9	335.3	11.9645	10	3311
210	403.71	335.348	12.1353	10	3326
211	404.662	335.602	12.0308	10	3341
212	404.895	335.376	11.9244	10	3356
213	405.29	335.732	12.0707	10	3371
214	405.039	335.981	12.4292	10	3386
215	404.848	336.127	12.3733	10	3401
216	404.642	335.769	12.3581	10	3416
217	405.491	336.103	12.8631	10	3432
218	404.986	336.16	12.6029	10	3448
219	405.356	335.721	12.5071	10	3464
220	405.554	336.031	12.5206	10	3481
221	405.71	336.67	12.6555	10	3498
222	405.277	336.608	12.6382	10	3514
223	405.148	336.629	12.6475	10	3531
224	406.236	337.094	12.5557	10	3547
225	405.716	336.806	12.523	10	3564
226	405.816	336.435	12.2102	10	3581
227	405.823	336.224	12.545	10	3598
228	405.581	336.129	12.528	10	3614
229	404.821	335.807	12.3365	10	3631
230	405.403	336.334	12.2412	10	3647
231	405.368	336.263	12.3508	10	3663
232	406.034	336.61	12.0953	10	3678
233	405.867	336.326	11.9409	10	3693
234	405.468	336.11	12.3905	10	3708
235	404.808	335.786	12.3327	10	3723
236	404.717	336.01	12.3115	10	3738
237	405.034	335.991	12.2915	10	3753
238	404.944	335.988	12.3004	10	3768
239	404.982	335.031	12.1976	10	3783
240	405.082	335.736	12.4005	10	3797
241	404.848	335.655	12.5039	10	3812
1	123.369	236.393	14.4595	11	10
2	123.139	236.027	14.4253	11	24
3	123.119	235.647	14.4608	11	39
4	123.363	236.281	14.6393	11	54
5	123.14	236.063	14.6672	11	69
6	122.763	235.806	14.5514	11	83
7	122.837	235.666	14.6301	11	98
8	122.816	235.456	14.2059	11	105
9	122.308	235.455	14.3063	11	127
10	122.424	235.6	14.1216	11	135
11	122.676	236.021	14.352	11	157
12	122.68	236.258	14.2391	11	165
13	123.353	236.615	14.5238	11	186
14	122.812	236.26	14.8195	11	201
15	123.414	236.213	14.7799	11	216
16	122.934	235.793	14.7322	11	231
17	123.102	236.588	14.8593	11	246
18	123.305	236.771	14.8516	11	261
19	123.395	237.209	14.6781	11	276
20	123.816	237.419	14.636	11	291
21	123.779	237.213	14.6433	11	306
22	123.471	237.174	14.5671	11	321
23	123.498	237.467	14.5301	11	336
24	123.404	237.548	14.6821	11	351
25	123.634	237.444	14.7954	11	366
26	123.375	237.515	14.6395	11	381
27	123.764	237.408	14.7889	11	396
28	123.072	237.177	14.4947	11	412
29	122.992	236.664	14.3847	11	428
30	122.859	236.629	14.409	11	444
31	122.939	236.878	14.3261	11	460
32	123.241	237.281	14.2167	11	469
33	122.956	237.036	14.6157	11	492
34	122.781	236.724	14.784	11	507
35	122.877	236.138	14.3725	11	524
36	122.988	236.415	14.3821	11	539
37	122.989	236.181	14.3477	11	555
38	122.784	236.556	14.3988	11	571
39	122.546	236.46	14.6205	11	587
40	122.979	236.418	14.7933	11	603
41	122.789	235.844	14.9422	11	619
42	122.484	235.561	14.9333	11	633
43	122.788	235.526	14.6735	11	649
44	122.631	235.654	14.773	11	665
45	122.131	235.892	14.7939	11	681
46	122.355	236.114	14.8082	11	697
47	122.387	236.038	14.6847	11	713
48	122.159	235.363	14.8135	11	729
49	122.163	235.203	14.9591	11	745
50	122.415	235.274	15.1298	11	761
51	122.604	235.666	15.0742	11	777
52	123.178	235.739	15.3908	11	791
53	122.731	235.157	15.2968	11	805
54	122.531	235.534	15.5027	11	819
55	122.402	235.649	15.4022	11	833
56	122.857	235.68	15.5504	11	847
57	122.435	235.727	15.477	11	861
58	122.862	236.253	15.2462	11	874
59	123.193	236.429	15.173	11	888
60	123.149	236.24	15.2484	11	902
61	123.224	236.667	15.3076	11	916
62	123.18	236.531	15.3538	11	930
63	123.494	236.844	15.414	11	945
64	123.876	237.086	15.6501	11	958
65	124.091	237.165	15.5984	11	973
66	124.083	237.299	15.4353	11	988
67	123.914	237.161	15.2661	11	1003
68	123.643	236.996	15.0653	11	1017
69	123.525	236.769	14.9355	11	1032
70	123.488	236.884	14.9102	11	1048
71	123.473	236.69	14.7488	11	1064
72	123.419	236.952	15.0811	11	1080
73	123.368	237.009	14.9248	11	1096
74	122.923	236.419	14.8128	11	1112
75	122.999	236.388	14.9499	11	1128
76	122.432	235.861	15.0221	11	1143
77	122.755	235.735	15.2938	11	1159
78	122.901	235.828	15.2783	11	1175
79	123.182	236.046	15.4637	11	1192
80	123.073	235.858	15.0826	11	1208
81	123.022	235.799	15.0029	11	1224
82	122.749	235.354	14.8584	11	1240
83	122.911	235.49	14.7632	11	1256
84	123.219	235.647	15.0749	11	1272
85	123.326	235.931	15.48	11	1288
86	123.504	236.193	15.7422	11	1304
87	123.332	235.348	15.437	11	1320
88	123.536	235.43	15.1733	11	1336
89	123.25	234.997	15.0178	11	1352
90	123.093	234.813	15.1785	11	1368
91	123.793	235.313	15.1116	11	1383
92	123.903	235.286	15.2627	11	1399
93	124.021	235.551	15.4029	11	1415
94	124.11	235.467	15.5932	11	1431
95	124.364	235.243	15.5955	11	1447
96	124.95	235.201	15.6918	11	1461
97	125.008	235.364	15.6008	11	1476
98	125.221	235.93	15.7068	11	1491
99	125.531	236.662	15.5816	11	1507
100	125.388	236.527	15.6623	11	1524
101	124.957	236.267	15.4402	11	1541
102	125.08	236.208	15.2846	11	1558
103	125.331	236.64	15.7972	11	1574
104	125.095	236.656	15.7571	11	1589
105	125.48	236.879	15.6795	11	1604
106	125.59	237.231	15.4612	11	1621
107	124.866	237.343	15.4392	11	1638
108	124.828	236.896	15.5325	11	1655
109	125.173	236.287	15.329	11	1672
110	125.666	236.385	15.0696	11	1689
111	125.123	236.557	15.0158	11	1705
112	125.083	236.243	15.231	11	1722
113	125.378	236.128	15.6016	11	1739
114	125.359	236.213	15.4628	11	1756
115	125.021	235.897	15.0426	11	1773
116	125.135	235.631	15.0859	11	1790
117	124.837	235.541	15.1596	11	1807
118	125.042	235.797	15.3651	11	1824
119	125.374	236.081	15.4534	11	1840
120	124.944	235.847	15.6642	11	1856
121	124.438	235.018	15.4941	11	1873
122	124.416	235.179	15.4752	11	1889
123	124.529	235.157	15.3831	11	1905
124	124.663	235.051	15.4051	11	1922
125	124.359	234.95	15.1252	11	1940
126	124.565	235.27	15.4693	11	1957
127	124.716	235.442	15.468	11	1975
128	124.418	234.789	15.5576	11	1993
129	124.45	234.603	15.5494	11	2011
130	124.52	234.754	15.5849	11	2029
131	124.463	234.663	15.4988	11	2047
132	124.4	234.555	15.4644	11	2064
133	124.017	234.917	15.5874	11	2081
134	124.025	235.419	15.7526	11	2099
135	124.537	235.502	15.8965	11	2117
136	124.774	235.461	15.8085	11	2133
137	124.639	235.827	16.1711	11	2150
138	124.938	236.223	16.1919	11	2166
139	125.198	236.278	16.1775	11	2182
140	125.659	236.496	16.3464	11	2198
141	125.388	236.675	16.2437	11	2214
142	124.873	236.368	15.9877	11	2230
143	125.047	236.336	15.7647	11	2246
144	125.248	236.287	15.6927	11	2261
145	125.376	236.299	15.9181	11	2277
146	125.526	236.71	15.9408	11	2293
147	125.655	236.723	16.0546	11	2310
148	125.949	236.443	16.1159	11	2326
149	125.703	235.536	16.0113	11	2341
150	125.551	235.321	15.9507	11	2358
[truncated: 1,817 more rows]
