# Supplementary material for: Functional visualization of NK cell-mediated killing of metastatic single tumor cells
Source: eLife journal article supplement (doi:10.7554/elife.76269), 2022-02-03
Supplement: supp [file tumor_7.xlsx]

## Sheet: Sheet1
1	169.502	0	5	1	0
2	169.334	0	5	1	11
3	169.701	0	5	1	23
4	170.659	0	5	1	31
6	172.956	0	12.4338	1	58
9	170.228	0	5	1	93
10	169.462	0	5	1	106
11	170.117	0	5	1	118
12	170.355	0	5	1	131
15	170.03	0	5	1	173
16	169.46	0	5	1	186
17	169.407	0	5	1	196
19	169.922	0	5	1	220
21	169.679	0	11.8776	1	260
23	169.89	0	9.18023	1	291
25	171.379	0	11.4877	1	318
27	169.527	0	11.9211	1	352
34	170.148	0	11.4425	1	459
40	172.032	0	12.1809	1	544
47	170.653	0	13.0997	1	630
48	170.193	0	11.8321	1	645
54	170.193	0	12.488	1	721
61	169.514	0	11.7198	1	796
1	118.179	122.067	5	2	1
2	118.156	119.775	5	2	12
3	117.303	119.863	5	2	24
4	118.235	121.755	5	2	33
5	117.829	121.223	5	2	44
6	117.598	120.481	5	2	54
7	117.726	120.354	5	2	70
8	117.82	120.132	5	2	83
9	118.029	120.63	5	2	95
10	117.957	120.682	5	2	108
11	118.78	120.53	7.11724	2	120
12	118.287	120.847	5	2	133
13	118.466	119.792	5	2	144
14	118.159	119.892	6.3777	2	161
15	118.332	119.206	5	2	175
16	117.703	119.695	5	2	188
18	118.46	119.084	8.50851	2	209
19	118.283	119.198	7.71674	2	222
20	118.428	118.748	7.1241	2	240
21	117.957	119.131	7.74728	2	258
27	117.61	118.489	8.30565	2	350
28	118.94	115.595	9.66366	2	367
29	118.569	116.32	9.67381	2	383
34	118.285	118.379	7.46666	2	458
42	119.094	120.783	11.0786	2	569
43	119.55	118.666	9.29453	2	580
1	199.11	0	9.58182	3	2
4	198.516	0	9.29131	3	34
5	198.682	0	10.173	3	45
6	199.507	0	9.2706	3	56
7	198.375	0	10.9835	3	72
9	193.15	0	12.8409	3	98
10	199.196	0	8.52153	3	109
11	198.47	0	10.8219	3	121
12	198.75	0	10.1934	3	134
13	198.937	0	10.1546	3	147
14	199.616	0	10.7856	3	162
15	198.639	0	10.9348	3	177
17	206.743	0	12.0479	3	198
19	199.985	0	11.5263	3	223
22	198.91	0	11.0883	3	275
24	200.743	0	11.0569	3	304
25	200.161	0	11.7552	3	319
27	198.898	0	11.0072	3	351
28	199.538	0	11.3533	3	368
29	199.343	0	11.1172	3	382
30	201.246	0	11.1062	3	401
32	200.218	0	11.8316	3	428
35	199.341	0	11.2233	3	476
36	198.844	0	10.5126	3	492
38	201.169	0	11.8904	3	513
39	200.407	0	11.4242	3	528
40	199.634	0	11.1672	3	542
43	200.105	0	11.9044	3	581
45	199.43	0	10.6051	3	602
46	199.696	0	12.818	3	614
47	199.64	0	11.0211	3	629
48	199.89	0	11.5479	3	646
50	199.763	0	10.8389	3	666
51	199.405	0	11.1524	3	681
53	200.163	0	12.2417	3	708
54	199.86	0	11.6239	3	722
55	198.443	0	11.6773	3	734
58	200.282	0	12.4696	3	762
61	197.164	0	14.6814	3	801
66	197.642	0	14.3231	3	843
67	199.637	0	13.2213	3	850
68	198.748	0	12.826	3	859
69	198.671	0	13.1223	3	869
71	199.486	0	11.8167	3	886
73	201.817	0	12.9678	3	904
78	200.669	0	11.7219	3	942
81	200.35	0	13.0053	3	964
82	199.958	0	12.4418	3	974
83	200.773	0	11.3619	3	982
1	86.6362	144.356	10.0441	4	3
2	87.3653	145.152	10.3904	4	14
4	87.5231	145.101	10.2392	4	35
5	87.0071	145.428	10.1829	4	46
6	85.8656	154.925	10.8848	4	57
7	87.7589	148.215	10.5666	4	73
8	87.7298	149.373	9.79167	4	85
9	86.9192	147.29	10.8885	4	97
13	84.0978	136.423	12.8993	4	148
14	82.289	134.813	18.0315	4	171
16	97.9911	127.833	23.6251	4	195
17	97.9509	125.521	22.8286	4	207
18	97.988	125.072	21.266	4	218
19	97.4978	123.806	22.7273	4	235
20	97.6825	123.932	22.8952	4	253
21	98.2948	125.135	22.494	4	270
22	100.137	125.45	25	4	289
23	98.8969	124.823	25	4	301
24	97.9943	123.679	22.6618	4	314
25	97.7791	123.371	23.0485	4	330
26	98.2073	124.042	23.4082	4	345
27	97.2101	123.464	25	4	364
28	98.1807	122.958	22.2387	4	377
29	98.316	122.781	25	4	398
30	96.8707	122.438	23.4568	4	409
31	96.8749	123.263	23.2413	4	424
32	98.2406	122.525	25	4	440
33	97.6474	123.085	23.3021	4	453
34	98.0307	123.244	25	4	473
35	98.7312	123.685	22.6592	4	487
36	98.6169	123.502	25	4	501
37	99.2163	122.962	21.6336	4	511
38	97.9693	123.485	22.6657	4	523
39	99.0869	124.098	21.8675	4	539
40	97.8756	123.432	20.844	4	553
41	97.412	124.164	25	4	565
42	98.0543	123.546	23.18	4	578
43	98.7101	124.05	25	4	590
44	98.0806	123.262	22.0007	4	599
45	98.9967	124.159	21.6211	4	611
46	97.1081	123.416	23.0975	4	624
47	99.0152	125.04	22.6022	4	638
48	108.143	125.374	21.0726	4	653
49	121.801	114.803	23.3102	4	663
50	123.151	108.6	19.6258	4	674
51	123.207	107.738	20.8532	4	690
52	124.035	105.584	19.85	4	701
53	124.729	103.822	19.7178	4	715
54	124.538	104.001	20.6206	4	727
55	123.688	102.975	20.0711	4	740
56	124.327	102.848	20.173	4	748
57	122.88	103.757	20.8119	4	758
59	124.269	100.752	20.6794	4	778
60	124.937	98.0884	21.1721	4	790
61	125.423	93.3186	20.8371	4	802
62	125.047	89.8172	19.7256	4	812
63	127.332	84.4611	18.803	4	818
64	128.001	86.2094	19.1127	4	826
65	128.138	85.9496	19.3304	4	834
66	128.031	86.8914	19.2487	4	844
67	127.922	87.2865	19.3508	4	854
68	127.816	87.1786	19.3658	4	865
69	127.401	84.5133	18.2079	4	872
70	127.733	84.5554	18.5659	4	881
71	129.244	85.9758	18.4036	4	891
72	129.567	83.7238	18.4649	4	900
73	129.853	84.4694	18.7908	4	910
74	129.027	83.7045	18.972	4	918
75	129.266	84.4921	18.937	4	923
76	129.593	84.5725	18.9322	4	932
77	129.839	85.4256	18.876	4	939
78	129.806	85.5116	19.1195	4	945
79	130.392	86.9527	19.1097	4	951
80	129.733	86.0166	18.9365	4	959
81	129.163	85.1408	19.2121	4	969
82	128.974	84.6087	19.0971	4	977
83	128.769	81.5897	18.9888	4	986
84	128.491	81.8683	18.9865	4	991
85	128.953	82.6326	18.9811	4	999
86	129.186	83.4921	19.1578	4	1006
87	128.388	83.1988	19.005	4	1012
88	127.806	81.8872	19.1538	4	1020
89	128.198	81.2209	19.313	4	1029
90	127.482	81.2678	19.5055	4	1038
91	127.409	81.6238	19.3672	4	1046
92	117.521	80.9305	25	4	1051
93	115.47	80.9285	25	4	1059
94	120.444	85.0815	25	4	1068
95	120.541	84.2493	25	4	1077
96	120.787	87.6854	25	4	1086
97	123.399	90.4785	25	4	1092
98	119.802	85.8876	25	4	1099
99	119.573	85.6803	25	4	1104
100	117.742	83.8358	25	4	1112
101	117.846	84.1346	25	4	1117
102	120.319	86.7341	25	4	1124
103	121.802	88.3199	25	4	1130
104	124.442	90.7983	25	4	1138
105	119.246	84.9289	25	4	1146
106	119.087	84.779	25	4	1154
107	118.644	84.9408	25	4	1160
108	122.179	83.0449	25	4	1169
109	121.808	87.7449	25	4	1178
110	123.021	89.8423	25	4	1185
111	122.621	87.8247	25	4	1192
112	123.249	88.5553	25	4	1197
113	121.173	85.7703	25	4	1204
114	121.761	86.1802	25	4	1211
115	125.047	88.4073	25	4	1219
117	123.455	87.6313	25	4	1232
119	122.959	87.2303	25	4	1241
120	121.592	85.1372	25	4	1249
121	124.195	87.6043	25	4	1257
122	124.756	86.4415	25	4	1263
125	123.598	88.0884	25	4	1277
126	122.778	86.0071	25	4	1283
127	123.439	84.5656	25	4	1290
128	125.198	85.4427	25	4	1299
129	129.098	87.8594	25	4	1306
133	120.95	85.5844	25	4	1320
134	119.757	85.1483	25	4	1325
139	121.35	86.9514	25	4	1347
140	120.232	86.3171	25	4	1356
141	119.994	85.3425	25	4	1363
142	123.437	88.9946	25	4	1368
146	121.624	88.3629	25	4	1380
147	120.15	86.1786	25	4	1384
148	122.554	87.7547	25	4	1391
149	124.773	88.569	25	4	1397
152	123.206	89.7366	25	4	1407
153	120.637	87.316	25	4	1410
154	120.155	86.9977	25	4	1417
155	123.232	89.4055	25	4	1421
159	119.204	87.8275	25	4	1438
160	118.645	87.9797	25	4	1443
161	121.052	88.4721	25	4	1449
166	118.785	88.883	25	4	1470
167	117.595	88.0587	25	4	1474
168	118.975	89.991	25	4	1479
1	283.93	51.9168	5	5	4
2	283.443	52.0748	5	5	15
3	284.4	50.9063	5	5	25
4	284.317	52.4196	5	5	36
5	283.69	53.7626	5	5	47
6	284.592	53.7529	5	5	59
7	284.714	52.306	5	5	74
8	284.223	51.6005	5	5	86
9	288.585	49.4449	5	5	99
10	284.608	51.1428	5	5	110
11	284.979	51.5365	5	5	122
12	284.44	53.4056	5	5	135
13	284.49	52.9293	5	5	149
14	283.979	52.0945	5	5	164
15	283.565	51.5338	5	5	178
16	283.604	51.9147	5	5	189
17	283.828	51.3043	5	5	199
18	283.902	51.7531	5	5	210
19	284.254	52.784	5	5	224
20	284.383	51.8408	5	5	242
21	283.515	51.3583	5	5	261
22	282.913	51.3983	5	5	277
23	283.826	51.3706	5	5	293
24	284.276	51.1856	5	5	306
25	284.196	52.5169	5	5	320
26	284.602	52.8113	5	5	334
27	284.127	51.5019	5	5	354
28	283.175	51.6427	5	5	370
29	284.53	50.1951	5	5	385
30	283.974	51.8221	5	5	403
31	283.617	52.0982	5	5	413
32	283.93	52.6808	5	5	430
33	285.005	51.799	5	5	443
34	284.401	51.1006	5	5	461
35	283.81	51.3835	5	5	478
36	284.57	51.5909	5	5	494
37	285.072	51.537	5	5	504
38	285.195	51.5712	5	5	514
39	285.332	52.6228	5	5	529
40	285.641	52.3764	5	5	545
41	284.985	51.9965	5	5	559
42	284.685	51.9697	5	5	570
43	285.189	51.5412	5	5	582
44	284.442	52.4235	5	5	593
45	284.653	52.752	5	5	603
46	284.39	53.7338	5	5	615
47	285.295	52.0348	5	5	631
50	284.112	51.8543	5	5	667
51	284.27	52.2505	5	5	682
1	338.431	151.074	10.3008	6	5
2	339.013	149.873	9.50839	6	18
3	338.234	150.865	9.89771	6	26
4	340.855	146.127	9.81469	6	38
5	343.11	143.267	8.4654	6	50
6	343.484	142.288	8.35263	6	61
7	344.284	141.464	9.49382	6	78
8	344.066	140.563	9.75785	6	89
9	344.31	139.68	9.71935	6	101
10	344.559	140.225	8.54679	6	111
11	344.666	140.248	9.03775	6	125
12	344.914	140.043	8.94541	6	137
13	344.847	139.093	9.37133	6	151
14	344.922	138.484	10.2687	6	166
15	344.217	138.064	9.79515	6	180
16	343.994	137.306	10.1625	6	191
17	344.456	135.212	10.2316	6	201
18	344.715	134.434	10.9524	6	212
20	344.898	133.684	10.6404	6	245
21	344.787	133.451	11.5854	6	264
22	344.235	133.146	11.2694	6	280
24	344.604	130.253	12.0176	6	307
26	344.7	130.342	11.8021	6	337
27	344.392	130.578	11.9762	6	355
29	344.823	130.068	12.2331	6	388
30	345.058	129.618	12.554	6	404
31	344.84	130.211	12.0472	6	416
35	344.968	130.081	11.9058	6	480
36	345.42	129.653	11.8207	6	495
37	345.744	128.643	12.2806	6	505
38	345.973	128.767	11.7209	6	517
39	346.022	128.165	11.54	6	532
40	345.817	128.629	11.9742	6	547
41	345.404	128.709	11.347	6	561
42	345.489	128.301	11.755	6	572
43	345.128	127.41	10.9298	6	585
46	345.4	127.561	12.1667	6	618
47	346.115	127.542	13.0723	6	633
48	345.421	127.161	12.2718	6	648
49	345.183	127.362	11.8649	6	658
50	345.265	127.056	12.0291	6	668
51	345.002	127.335	11.7706	6	684
52	345.295	127.18	12.1652	6	695
54	345.829	125.812	13.1893	6	724
55	344.865	127.227	13.0217	6	736
56	344.488	126.681	12.4678	6	745
57	344.586	126.067	12.6456	6	754
58	345.421	124.541	12.5411	6	764
59	345.166	124.755	12.5439	6	773
60	345.454	124.926	13.0893	6	787
61	345.443	124.902	13.4431	6	798
62	345.277	124.718	13.2084	6	809
63	344.549	125.308	13.6321	6	816
64	343.536	124.888	12.3751	6	824
65	344.004	124.54	13.2327	6	832
66	344.204	124.415	12.6647	6	841
67	345.229	123.452	12.6056	6	851
68	345.062	123.615	13.0342	6	861
70	344.597	122.931	12.71	6	879
71	344.549	122.452	12.1723	6	888
73	346.979	118.899	11.9763	6	907
74	346.19	121.651	11.596	6	915
75	346.767	119.305	11.443	6	921
76	348.037	116.258	11.4025	6	928
77	348.402	112.808	18.1551	6	936
78	348.852	111.712	18.0766	6	943
79	348.775	111.916	12.0221	6	949
80	348.888	111.99	12.5304	6	957
83	349.797	112.214	11.9032	6	984
84	349.223	111.16	12.0597	6	989
85	349.306	110.845	18.8167	6	996
86	346.525	107.968	18.4675	6	1003
87	346.323	108.474	18.5481	6	1010
88	348.335	111.333	11.8786	6	1017
89	347.882	112.263	11.9533	6	1026
90	347.708	112.704	12.0714	6	1036
91	346.895	111.544	11.9991	6	1044
92	346.514	112.421	12.0958	6	1048
93	346.124	113.16	12.3772	6	1055
94	346.282	115.22	12.1705	6	1063
95	346.537	109.383	12.2515	6	1071
96	334.143	99.0765	11.3799	6	1080
100	326.384	95.1212	11.6189	6	1107
102	325.051	95.2667	11.856	6	1119
103	322.133	94.6212	12.0075	6	1126
104	321.565	94.5893	12.3711	6	1133
105	321.069	93.8683	12.191	6	1142
106	319.078	94.0689	12.3659	6	1149
108	313.017	100.641	17.1616	6	1164
109	311.775	102.533	17.5584	6	1173
110	311.014	105.313	19.9148	6	1183
111	309.603	106.105	23.1978	6	1190
112	308.826	107.048	25	6	1198
113	307.478	106.578	25	6	1205
114	308.296	106.225	25	6	1212
115	309.393	108.016	25	6	1220
116	309.417	108.973	21.4749	6	1224
120	308.966	101.789	25	6	1250
127	308.572	101.149	25	6	1291
1	416.124	193.102	11.9795	7	6
2	416.796	193.017	11.2804	7	19
3	417.283	194.084	10.929	7	27
4	417.387	192.912	11.6038	7	39
5	414.532	197.814	5	7	49
6	417.261	193.895	10.421	7	62
7	415.084	198.516	5	7	77
8	414.869	199.624	5	7	88
9	416.823	194.753	10.0354	7	102
10	417.099	194.721	10.4856	7	112
11	415.748	196.315	7.81345	7	124
12	417.566	194.043	10.775	7	138
13	415.674	193.228	10.7152	7	152
14	416.827	194.065	10.9544	7	167
15	416.9	194.578	9.25599	7	181
16	416.914	194.77	9.52344	7	192
17	417.215	194.342	10.3599	7	202
18	417.324	192.83	11.5518	7	213
19	416.289	193.668	11.8868	7	228
20	417.36	193.392	11.8983	7	246
21	415.453	194.404	12.5596	7	265
22	418.803	194.187	11.0347	7	279
23	416.048	194.481	11.8308	7	296
24	416.028	193.09	12.7338	7	308
25	415.44	193.056	12.7555	7	323
26	415.025	193.485	13.0244	7	338
27	415.999	192.897	12.9286	7	356
28	415.53	193.315	12.5899	7	371
29	415.731	192.825	12.2075	7	390
30	416.44	193.088	12.5731	7	405
31	415.703	193.025	13.0342	7	417
32	414.875	192.582	12.8209	7	431
33	415.939	192.854	12.0176	7	446
34	415.728	193.359	13.1637	7	464
35	416.3	193.431	11.6054	7	482
36	416.154	193.647	12.4449	7	497
37	416.85	193.523	12.7693	7	507
38	417.538	193.353	11.5747	7	518
39	417.833	194.549	12.1031	7	533
40	416.904	194.129	11.8062	7	548
41	416.461	194.613	11.858	7	562
42	416.936	192.868	12.6487	7	573
43	416.768	194.463	11.5545	7	586
44	416.139	193.87	12.8846	7	594
45	416.176	194.192	12.6164	7	605
46	416.292	193.959	12.5028	7	619
47	416.085	193.953	12.8973	7	634
48	415.433	194.39	13.1281	7	649
49	416.192	194.312	12.8763	7	659
50	415.984	193.658	13.0423	7	669
51	415.858	194.095	12.792	7	685
52	415.734	194.639	13.4709	7	696
53	416.218	193.867	13.5678	7	710
54	414.642	193.694	15.4512	7	729
55	416.387	194.769	12.4401	7	737
56	415.356	194.372	14.0522	7	750
57	416.355	193.18	13.4117	7	755
58	415.046	193.116	13.9609	7	768
59	415.594	192.706	13.5093	7	774
60	415.269	194.195	13.8304	7	792
61	416.072	193.735	13.8258	7	804
62	416.142	194.137	13.2483	7	810
63	414.592	194.87	14.6688	7	820
64	414.27	194.146	14.4967	7	827
65	414.346	193.813	14.4996	7	835
66	414.04	194.055	14.5999	7	845
67	414.503	194.134	14.7971	7	855
68	416.055	194.027	13.1964	7	862
69	414.608	195.014	14.8504	7	874
70	414.157	193.767	14.768	7	883
71	414.939	194.274	14.75	7	893
72	416.326	194.09	14.0659	7	901
73	417.186	192.899	13.1052	7	908
74	417.433	194.1	13.1914	7	916
75	416.79	193.928	14.0194	7	924
76	417.908	194.211	13.4259	7	929
79	415.514	194.978	14.9778	7	952
80	415.901	194.286	15.888	7	960
81	425.814	195.949	11.5869	7	966
82	419.754	194.51	12.7292	7	975
1	231.73	312.565	5	8	7
2	231.665	312.352	5	8	20
3	232.56	311.239	5	8	28
4	232.667	311.914	5	8	40
5	232.72	313.265	5	8	51
6	233.249	313.46	5	8	63
7	233.374	312.857	5	8	79
8	233.069	312.572	5	8	90
9	232.28	312.113	5	8	103
10	232.761	311.518	5	8	114
11	232.426	312.018	5	8	127
12	230.972	311.498	6.75026	8	139
13	232.558	312.583	5	8	153
14	232.461	312.049	5	8	168
15	231.419	311.462	5	8	182
16	231.924	311.483	5	8	193
17	232.312	311.347	5	8	203
18	232.225	312.054	5	8	214
19	232.005	313.216	5	8	229
20	232.895	311.576	7.45478	8	248
21	232.453	311.858	5	8	266
24	231.823	311.157	5	8	309
25	231.539	311.401	7.00931	8	325
26	231.53	311.859	5	8	339
27	231.687	311.866	5	8	357
28	231.908	311.068	5	8	372
29	231.584	310.497	5	8	391
30	232.312	310.835	5	8	406
31	232.234	311.282	5	8	418
32	232.43	312.289	5	8	432
33	233.444	312.369	5	8	447
34	233.374	311.944	5	8	465
35	233.383	311.943	5	8	483
36	233.189	311.659	6.99067	8	499
37	233.539	311.649	5	8	508
38	233.624	311.71	5	8	519
39	233.487	312.67	5	8	534
40	234.461	312.499	5	8	549
42	232.476	312.022	7.00846	8	575
43	233.737	310.979	5	8	587
44	232.914	312.279	5	8	595
45	233.222	312.666	5	8	606
46	232.868	313.561	5	8	620
47	233.808	312.606	5	8	635
48	233.337	312.192	5	8	650
49	233.805	311.407	5	8	660
50	233.235	311.511	5	8	670
51	233.25	312.234	5	8	686
52	232.269	312.298	7.06865	8	698
53	232.927	312.419	5	8	711
54	232.575	311.955	5	8	725
55	232.371	311.613	8.58193	8	739
56	232.173	311.09	7.60823	8	747
57	233.121	310.29	5	8	756
58	232.634	310.77	5	8	765
59	232.168	311.211	6.31303	8	776
60	232.499	312.079	5	8	788
61	233.054	311.769	5	8	799
1	287.042	489.338	5	9	8
2	288.401	491.694	5	9	21
3	288.095	489.819	5	9	29
4	287.548	489.271	5	9	41
6	288.847	490.549	5	9	64
7	288.693	492.249	5	9	80
8	288.898	492.642	5	9	91
9	288.736	490.775	5	9	104
10	287.231	489.456	5	9	115
11	287.611	488.663	5	9	128
12	288.058	488.014	5	9	140
13	288.207	490.624	5	9	155
14	288.136	491.608	5	9	169
15	288.679	491.761	5	9	184
16	288.223	489.765	5	9	194
17	287.209	488.618	5	9	204
18	287.594	488.532	5	9	215
19	288.091	488.376	5	9	231
20	287.79	489.927	5	9	250
21	287.439	491.512	5	9	269
22	287.339	490.424	5	9	284
27	287.128	490.435	5	9	359
28	287.65	491.176	5	9	375
29	287.788	488.153	5	9	394
32	287.156	487.424	5	9	434
33	288.094	489.104	5	9	449
34	286.781	491.005	5	9	468
37	287.328	488.324	5	9	509
38	289.517	486.415	5	9	520
39	288.203	488.307	5	9	537
40	287.986	490.076	5	9	552
41	287.047	492.771	5	9	564
47	286.29	490.996	5	9	637
48	287.594	491.693	5	9	652
49	287.969	489.064	5	9	662
1	345.901	507.934	5	10	9
3	345.799	507.934	5	10	30
4	346.485	507.934	5	10	42
10	345.886	507.934	5	10	116
11	346.734	507.934	5	10	129
17	345.909	507.934	5	10	205
18	346.166	507.934	5	10	216
19	347.18	507.934	5	10	232
22	347.109	507.934	5	10	285
23	346.163	507.934	5	10	299
24	345.98	507.934	5	10	312
26	346.781	507.934	5	10	342
29	346.758	507.934	5	10	395
31	345.669	507.934	5	10	421
32	345.865	507.934	5	10	435
37	346.52	507.934	5	10	510
38	348.106	507.934	5	10	521
44	346.427	507.934	5	10	597
45	348.006	507.934	5	10	609
50	346.552	507.934	5	10	672
51	346.119	507.934	5	10	688
52	346.759	507.934	5	10	700
1	507.934	395.671	11.7431	11	10
5	507.934	394.238	11.018	11	53
6	507.934	394.181	11.172	11	66
10	507.934	394.632	12.0055	11	117
11	507.934	395.014	12.0309	11	130
12	507.934	395.224	10.9854	11	141
17	507.934	396.219	12.2715	11	206
18	507.934	395.39	12.2676	11	217
19	507.934	393.192	12.3089	11	234
20	507.934	394.505	11.8415	11	252
23	507.934	395.496	12.4917	11	300
24	507.934	395.369	12.5618	11	313
25	507.934	393.751	12.3822	11	328
26	507.934	394.087	12.4309	11	344
27	507.934	396.27	12.5142	11	360
31	507.934	395.019	12.8303	11	422
32	507.934	395.054	12.6172	11	436
33	507.934	393.97	12.2746	11	451
34	507.934	393.615	12.2148	11	469
38	507.934	393.451	12.6995	11	522
44	507.934	393.736	12.464	11	598
45	507.934	393.048	12.5232	11	610
50	507.934	394.165	12.8929	11	673
51	507.934	394.205	12.7861	11	689
53	507.934	392.974	12.957	11	714
59	507.934	392.097	13.5471	11	777
66	507.934	394.857	13.7612	11	846
68	507.934	395.466	13.115	11	864
2	179.786	205.097	5	12	13
6	180.617	201.836	5	12	55
7	180.384	202.693	5	12	71
8	180.124	204.256	5	12	84
9	180.649	203.6	5	12	96
13	180.262	201.419	5	12	145
14	180.844	202.32	5	12	160
15	180.245	203.426	5	12	176
20	181.273	201.541	5	12	239
21	181.093	202.534	5	12	257
22	180.25	203.707	5	12	274
24	181.701	203.126	5	12	303
25	181.208	201.567	5	12	317
26	181.411	201.678	5	12	332
27	181.12	202.555	5	12	349
28	180.752	202.659	5	12	366
29	181.769	202.466	5	12	381
30	182.154	202.854	5	12	400
31	181.407	202.657	5	12	412
32	181.112	202.286	5	12	427
33	181.657	201.937	5	12	442
34	180.895	201.898	5	12	457
35	180.46	202.985	5	12	475
36	182.114	203.455	5	12	491
40	181.904	202.419	5	12	541
41	181.728	203.412	5	12	557
42	181.053	203.844	5	12	568
47	182.18	203.558	5	12	627
48	182.064	203.314	5	12	643
49	182.065	203.566	5	12	656
51	182.149	203.162	5	12	680
52	181.602	203.166	5	12	693
53	182.514	202.081	5	12	707
54	181.59	203.034	5	12	719
55	181.894	204.358	5	12	733
56	182.017	204.363	5	12	744
57	182.888	203.634	5	12	752
58	182.465	202.979	5	12	761
59	182.214	202.341	5	12	771
60	182.171	202.17	5	12	784
61	182.668	203.035	5	12	795
62	181.525	204.16	5	12	806
63	182.305	203.691	5	12	814
64	181.809	203.456	5	12	821
65	181.325	202.498	5	12	829
66	181.641	202.469	5	12	838
67	182.148	203.129	5	12	849
68	181.976	203.749	5	12	858
69	181.487	204.516	5	12	868
70	182.761	204.269	5	12	877
71	182.316	203.503	5	12	885
72	182.749	202.621	5	12	896
73	183.876	202.029	5	12	903
74	183.508	202.486	5	12	912
75	183.317	203.718	5	12	919
76	183.838	204.095	5	12	926
77	182.838	202.996	5	12	934
78	182.708	203.095	5	12	941
79	183.101	202.306	5	12	947
80	183.678	202.647	5	12	954
81	183.17	203.057	5	12	963
82	183.066	203.944	5	12	973
83	183.31	203.115	5	12	981
84	183.196	202.935	5	12	988
85	182.944	201.892	5	12	993
86	184.5	201.262	5	12	1001
87	184.169	201.533	5	12	1008
88	183.176	201.896	5	12	1015
89	182.605	202.916	5	12	1023
90	182.8	202.469	5	12	1033
91	182.65	202.083	5	12	1042
92	182.055	201.382	5	12	1047
93	181.822	200.946	5	12	1053
94	182.452	201.674	5	12	1061
95	181.831	201.965	5	12	1069
96	181.423	203.11	5	12	1078
97	181.895	201.426	5	12	1087
98	181.592	201.112	5	12	1094
100	182.008	200.638	5	12	1105
101	182.208	201.312	5	12	1113
103	181.134	201.988	5	12	1125
104	181.794	201.578	5	12	1131
105	181.79	201.02	5	12	1140
106	181.819	201.523	5	12	1147
107	181.908	201.173	5	12	1155
108	182.089	202.378	5	12	1161
109	181.71	202.925	5	12	1170
110	182.911	203.401	5	12	1179
111	182.728	202.959	5	12	1187
112	182.803	202.379	5	12	1193
113	182.66	202.632	5	12	1199
114	182.679	202.559	5	12	1206
115	182.851	202.312	5	12	1213
116	183.005	203.411	5	12	1221
117	182.543	201.774	5	12	1228
118	182.66	202.392	5	12	1234
119	181.98	200.803	5	12	1238
120	182.102	200.46	5	12	1243
121	182.468	201.824	5	12	1252
122	181.633	201.535	5	12	1258
123	182.367	203.421	5	12	1264
124	181.931	202.376	5	12	1268
125	181.651	200.576	5	12	1274
126	181.963	200.336	5	12	1278
127	181.65	200.638	5	12	1285
128	181.635	200.379	5	12	1293
129	181.375	200.623	5	12	1301
130	181.667	202.024	5	12	1307
131	181.899	201.538	5	12	1310
132	181.702	199.963	5	12	1313
133	181.518	200.612	5	12	1316
135	181.463	201.057	5	12	1326
137	181.218	200.45	5	12	1337
138	180.865	199.951	5	12	1342
139	181.094	199.617	5	12	1345
140	181.245	199.671	5	12	1349
141	182.344	201.433	5	12	1358
142	181.79	201.124	5	12	1365
143	181.505	202.419	5	12	1369
144	182.383	201.409	5	12	1373
145	181.597	201.902	5	12	1375
146	181.979	201.369	5	12	1378
147	182.789	200.214	5	12	1381
148	182.624	201.611	5	12	1386
149	182.346	201.574	5	12	1392
150	182.252	202.021	5	12	1398
151	182.636	202.507	5	12	1402
154	181.92	200.43	5	12	1412
155	181.009	201	5	12	1418
156	181.255	202.408	5	12	1422
157	182.152	201.707	5	12	1426
161	181.447	202.057	5	12	1445
162	180.564	200.979	5	12	1450
163	181.258	202.299	5	12	1454
2	272.575	104.701	5	13	16
7	272.451	104.165	5	13	75
16	271.861	104.416	5	13	190
19	272.618	104.301	5	13	225
21	271.562	103.748	5	13	262
22	271.579	103.046	5	13	278
23	271.646	104.41	5	13	294
25	272.47	103.497	5	13	321
26	272.375	103.513	5	13	335
31	272.347	105.397	5	13	414
34	272.404	103.346	5	13	462
38	273.213	105.863	5	13	515
42	272.79	104.414	5	13	571
43	273.05	104.873	5	13	583
2	265.18	139.735	5	14	17
4	265.734	140.717	5	14	37
5	265.169	140.845	5	14	48
6	265.366	140.198	5	14	60
7	265.133	139.839	5	14	76
8	265.515	140.23	5	14	87
9	265.586	140.011	5	14	100
11	265.762	140.209	5	14	123
12	265.386	140.073	5	14	136
13	264.968	139.597	5	14	150
14	265.07	138.838	5	14	165
15	265.108	139.27	5	14	179
17	264.987	139.749	5	14	200
18	264.896	139.335	5	14	211
19	265.183	139.066	5	14	226
20	265.139	138.999	5	14	243
21	264.876	138.566	5	14	263
26	265.099	138.877	5	14	336
29	265.556	138.14	6.45732	14	386
31	264.65	138.704	5	14	415
33	265.105	138.675	5	14	444
34	265.153	138.226	5	14	463
35	265.618	138.74	5	14	479
38	265.984	139.362	5	14	516
39	266.023	139.051	5	14	530
40	265.798	139.263	5	14	546
41	266.131	138.821	5	14	560
43	265.882	138.727	5	14	584
45	265.859	139.235	5	14	604
46	265.607	139.05	5	14	616
47	265.41	138.99	5	14	632
48	265.739	138.407	5	14	647
51	265.155	139.126	5	14	683
52	264.914	139.187	5	14	694
54	265.436	138.707	5	14	723
55	265.299	138.814	6.46373	14	735
57	265.487	138.478	6.43207	14	753
58	265.823	138.712	6.87041	14	763
60	265.49	138.696	6.87686	14	785
61	265.887	138.383	6.95899	14	797
62	265.122	138.686	7.3233	14	807
63	265.345	138.66	7.99106	14	815
64	264.91	138.914	8.25984	14	823
65	264.904	139.07	7.91949	14	830
66	265.337	139.246	7.6794	14	839
69	265.068	138.955	7.78906	14	870
70	265.498	138.959	7.42586	14	878
71	265.724	138.988	7.29787	14	887
72	266.979	138.805	7.26231	14	897
73	266.444	138.599	6.30144	14	905
74	266.951	138.41	6.6145	14	914
75	266.446	138.847	6.66636	14	920
76	266.566	138.762	6.81528	14	927
77	266.622	139.119	6.53135	14	935
80	266.856	139.242	6.9486	14	955
81	264.53	139.556	8.40551	14	965
83	264.95	138.388	7.64303	14	983
85	261.221	139.463	5.88109	14	994
86	261.411	139.327	7.01937	14	1002
87	264.31	138.705	8.23969	14	1009
88	260.502	137.715	7.28973	14	1016
89	257.146	137.278	8.00291	14	1024
90	263.193	137.247	8.67307	14	1034
91	253.971	133.346	9.9281	14	1043
93	253.774	131.123	10.8156	14	1054
94	252.363	131.531	11.3673	14	1062
95	252.28	131.129	10.9681	14	1070
96	249.982	131.618	13.0571	14	1079
97	248.308	132.548	12.7152	14	1088
99	246.143	132.78	13.99	14	1101
100	245.134	132.972	13.5773	14	1106
102	244.899	133.161	13.2296	14	1118
104	244.506	133.307	13.7482	14	1132
105	244.158	133.344	13.4756	14	1141
106	243.283	133.928	13.725	14	1148
107	242.566	133.417	15.4366	14	1157
108	242.184	133.638	16.3468	14	1163
109	244.286	133.665	15.1425	14	1172
110	243.835	133.502	16.0559	14	1181
111	241.687	134.322	15.8302	14	1189
112	240.421	132.148	19.5127	14	1195
120	240.709	128.38	18.5523	14	1245
127	240.079	126.984	20.3026	14	1286
128	240.576	123.255	17.6777	14	1295
129	241.729	121.594	17.1365	14	1302
2	368.741	507.934	5	15	22
5	368.609	507.934	5	15	52
6	367.803	507.934	5	15	65
8	367.57	507.934	5	15	92
9	367.847	507.934	5	15	105
13	368.232	507.934	5	15	156
14	365.037	507.934	5	15	170
15	369.852	507.934	5	15	185
19	368.125	507.934	5	15	233
20	368.466	507.934	5	15	251
22	368.338	507.934	5	15	286
25	368.354	507.934	5	15	327
26	368.172	507.934	5	15	343
28	368.799	507.934	5	15	376
33	368.92	507.934	5	15	450
35	369.206	507.934	5	15	486
39	369.539	507.934	5	15	538
42	368.858	507.934	5	15	577
46	369.241	507.934	5	15	623
53	368.89	507.934	5	15	713
4	186.008	100.67	5	16	32
5	199.09	99.1325	5	16	43
7	199.629	98.9246	5	16	69
8	197.045	100.276	5	16	82
9	197.649	99.2957	5	16	94
10	198.266	99.887	5	16	107
11	193.479	100.304	5	16	119
12	198.917	98.4713	5	16	132
13	198.971	98.7446	5	16	143
14	193.288	97.856	5	16	159
15	197.18	99.2515	5	16	174
16	197.046	99.019	5	16	187
17	198.406	99.0636	5	16	197
18	198.932	100.591	5	16	208
19	199.381	99.4496	5	16	221
20	200.471	98.6018	5	16	238
21	199.556	97.8446	5	16	256
22	200.998	98.507	5	16	273
23	200.193	98.6501	5	16	290
24	200.462	99.9135	5	16	302
25	200.871	97.9965	5	16	316
27	199.11	97.6892	5	16	348
28	199.398	97.8989	5	16	365
29	201.01	97.8232	5	16	380
30	200.739	100.185	5	16	399
31	200.537	101.078	5	16	411
32	200.171	99.462	5	16	426
33	199.803	98.4426	5	16	441
34	200.281	98.5169	5	16	456
35	199.618	95.9282	5	16	474
36	194.415	98.2015	5	16	490
37	199.59	99.3871	5	16	502
39	200.378	97.4265	5	16	526
40	199.895	98.7904	5	16	540
42	200.805	97.445	5	16	566
44	199.104	100.376	5	16	591
45	200.503	100.159	5	16	600
48	201.308	97.6245	5	16	642
50	200.981	99.2831	5	16	664
51	201.234	101.107	5	16	678
52	201.477	100.154	5	16	691
53	200.839	99.0675	5	16	705
54	200.675	98.2114	5	16	718
55	200.299	99.1484	5	16	732
56	200.523	99.3629	5	16	743
60	201.355	99.1077	5	16	783
64	206.644	88.8355	10.0859	16	822
74	203.514	92.8659	7.63185	16	913
79	206.397	90.5191	8.60999	16	948
6	507.934	107.849	14.8762	17	67
7	507.934	107.91	14.3841	17	81
12	507.934	107.293	14.6723	17	142
13	507.934	107.105	14.8228	17	157
14	507.934	107.637	14.3839	17	172
19	507.934	106.513	15.2352	17	236
20	507.934	106.393	15.0425	17	254
21	507.934	106.319	14.7873	17	271
22	507.934	107.34	14.6451	17	287
26	507.934	105.736	15.1449	17	346
27	507.934	105.733	14.8286	17	361
28	507.934	106.539	14.7497	17	378
29	507.934	107.181	14.7908	17	396
34	507.934	107.034	14.7222	17	470
40	507.934	107.564	15.263	17	554
46	507.934	107.053	15.3938	17	625
47	507.934	106.589	14.9606	17	639
48	507.934	107.134	14.8636	17	654
50	507.934	106.959	15.5108	17	675
52	507.934	106.933	15.5054	17	702
54	507.934	106.53	15.096	17	728
55	507.934	107.205	14.9447	17	741
56	507.934	108.232	15.0712	17	749
57	507.934	109.286	15.5292	17	759
58	507.934	106.267	15.7038	17	767
59	507.934	106.597	15.6169	17	779
60	507.934	106.156	15.728	17	791
61	507.934	106.268	15.3468	17	803
62	507.934	106.705	14.9691	17	813
63	507.934	107.448	15.1781	17	819
68	507.934	106.296	15.4111	17	866
69	507.934	107.799	15.4461	17	873
70	507.934	109.421	15.2581	17	882
71	507.934	109.083	15.8219	17	892
81	507.934	107.108	15.9888	17	970
82	507.934	107.578	15.8716	17	978
88	507.934	105.588	16.1168	17	1021
95	507.934	105.734	17.2416	17	1073
96	507.934	106.235	16.4326	17	1082
97	507.934	106.751	15.9607	17	1090
102	507.934	105.698	16.5683	17	1121
103	507.934	106.046	16.2163	17	1128
104	507.934	107.347	15.8702	17	1135
108	507.934	106.315	17.3431	17	1165
109	507.934	107.058	16.7222	17	1174
110	507.934	107.656	16.2708	17	1182
115	507.934	107.288	16.8873	17	1216
116	507.934	107.508	16.5433	17	1223
122	507.934	106.073	17.2206	17	1260
123	507.934	107.804	16.4836	17	1267
124	507.934	106.894	16.6782	17	1270
127	507.934	106.076	17.4605	17	1287
128	507.934	105.853	17.3776	17	1296
129	507.934	105.716	17.2745	17	1303
131	507.934	106.99	17.1974	17	1312
132	507.934	107.358	17.4298	17	1314
133	507.934	106.62	17.1707	17	1317
134	507.934	105.588	17.8132	17	1321
135	507.934	105.496	17.651	17	1328
136	507.934	105.957	16.8902	17	1332
137	507.934	105.408	16.9419	17	1338
138	507.934	107.229	17.0979	17	1343
140	507.934	105.838	17.4311	17	1351
141	507.934	106.326	17.7093	17	1359
142	507.934	106.865	17.5063	17	1366
143	507.934	107.798	16.9712	17	1370
144	507.934	108.303	17.04	17	1374
145	507.934	108.182	17.3363	17	1377
148	507.934	107.423	17.777	17	1388
149	507.934	107.663	17.4758	17	1393
150	507.934	107.661	17.2986	17	1399
151	507.934	107.896	17.1467	17	1404
154	507.934	106.385	17.7711	17	1414
156	507.934	106.765	17.441	17	1424
157	507.934	107.522	17.4905	17	1428
158	507.934	107.653	17.5467	17	1433
161	507.934	105.715	17.9137	17	1447
163	507.934	106.328	17.3897	17	1456
164	507.934	106.994	17.5678	17	1461
171	507.934	107.011	17.6738	17	1485
6	237.168	52.1044	25	18	68
13	236.331	50.4186	25	18	158
18	236.892	50.6997	25	18	219
19	237.88	52.1118	25	18	237
20	235.784	49.912	25	18	255
21	235.854	49.5973	25	18	272
22	237.042	51.2947	25	18	288
25	236.673	50.7567	25	18	331
26	236.863	50.8215	25	18	347
27	235.676	50.014	25	18	363
29	240.489	49.5357	25	18	397
32	236.738	49.9059	25	18	439
33	237.225	50.8363	25	18	455
34	237.37	50.184	25	18	472
35	237.649	50.1887	25	18	489
40	237.414	50.3058	25	18	556
46	237.521	51.4083	25	18	626
47	236.037	49.6119	25	18	641
48	238.73	49.1864	25	18	655
50	239.872	54.6099	25	18	677
52	237.317	50.2007	25	18	704
53	238.211	51.7956	25	18	717
54	239.365	54.5739	25	18	731
55	236.498	49.9605	25	18	742
56	240.395	55.7323	25	18	751
58	239.76	53.1077	25	18	769
59	238.954	52.2788	25	18	781
60	236.479	49.2467	25	18	793
61	235.633	49.3692	25	18	805
10	374.438	148.235	13.3733	19	113
11	377.192	147.665	11.4654	19	126
19	371.662	150.538	13.2046	19	227
22	371.512	153.366	12.8652	19	281
23	371.284	150.208	13.0695	19	295
24	369.823	149.305	13.8994	19	315
25	370.507	150.492	13.2252	19	322
29	371.031	149.99	13.6859	19	389
30	369.988	148.159	14.4983	19	410
31	372.227	145.893	15.2998	19	425
32	371.823	145.972	15.1916	19	437
33	373.52	143.653	14.2792	19	454
35	375.87	143.775	12.9649	19	481
36	376.483	143.266	13.0336	19	496
37	378	142.412	13.5649	19	506
38	380.266	141.374	14.4578	19	524
13	83.9825	157.24	8.67496	20	146
14	84.7816	154.141	9.79095	20	163
20	81.5097	165.306	11.1188	20	241
21	78.3303	167.588	9.71778	20	259
22	76.5248	182.103	10.2021	20	276
23	80.5814	178.96	11.3165	20	292
24	82.5808	177.092	12.0802	20	305
25	84.9063	176.449	14.8151	20	329
26	85.6529	177.844	12.7432	20	333
27	87.0901	180.604	12.7233	20	353
28	89.5983	181.907	13.0664	20	369
29	90.5131	185.188	13.3968	20	384
30	91.1114	186.627	13.656	20	402
31	91.6668	189.741	13.9762	20	423
32	90.9899	191.308	12.9883	20	429
33	91.3933	192.486	14.3824	20	452
34	81.2147	183.32	11.5403	20	460
35	79.3762	185.416	10.1914	20	477
36	80.3713	184.981	10.0695	20	493
37	81.159	186.535	9.87882	20	503
38	81.1718	186.432	10.3223	20	512
39	80.6916	186.868	10.4962	20	527
40	80.6548	186.833	10.1291	20	543
41	80.6657	186.049	10.0176	20	558
42	86.7406	192.799	5	20	567
43	87.6363	192.317	5	20	579
44	86.657	192.3	5	20	592
45	86.3086	191.646	5	20	601
46	85.9968	191.323	5	20	613
47	85.6833	191.056	7.07395	20	628
48	86.0909	190.809	6.80192	20	644
49	86.4231	191.259	6.89326	20	657
50	86.0295	192.229	6.81722	20	665
51	86.1642	191.842	5	20	679
52	85.6408	191.684	5	20	692
53	86.7571	190.153	5	20	706
54	85.7805	190.957	6.45907	20	720
13	437.296	417.856	5	21	154
15	438.501	418.806	5	21	183
20	437.365	416.462	5	21	249
21	438.612	417.605	5	21	268
22	437.63	418.562	5	21	283
23	437.807	419.633	5	21	298
24	438.893	418.551	5	21	311
25	437.151	417.063	5	21	326
26	437.738	417.005	5	21	341
28	438.144	418.123	5	21	374
29	438.533	417.807	5	21	393
30	439.289	418.012	5	21	408
31	438.222	417.829	5	21	420
34	438.704	416.897	5	21	467
35	438.966	418.545	5	21	485
36	438.484	419.608	5	21	500
39	439.079	417.768	5	21	536
40	438.558	417.829	5	21	551
42	439.328	419.092	5	21	576
43	440.298	420.716	5	21	589
45	438.469	417.538	5	21	608
46	437.495	417.486	5	21	622
52	437.317	417.442	5	21	699
19	231.362	360.76	5	22	230
20	230.801	359.256	5	22	247
21	230.064	358.692	5	22	267
22	230.356	358.327	5	22	282
23	231.229	359.746	5	22	297
24	231.54	360.99	5	22	310
25	231.14	359.441	5	22	324
26	231.098	359.414	5	22	340
27	230.44	358.551	5	22	358
28	230.124	358.584	5	22	373
29	232.199	357.456	5	22	392
30	231.926	360.367	5	22	407
31	231.403	361.373	5	22	419
32	232.114	360.538	5	22	433
33	231.459	359.379	5	22	448
34	230.57	358.766	5	22	466
35	230.869	358.752	5	22	484
36	232.029	359.585	5	22	498
39	232.813	360.459	5	22	535
40	231.629	359.39	5	22	550
41	231.064	359.002	5	22	563
42	232.201	358.748	5	22	574
43	232.461	360.028	5	22	588
44	232.213	361.864	5	22	596
45	232.878	361.92	5	22	607
46	232.003	360.421	5	22	621
47	230.914	359.35	5	22	636
48	231.033	357.994	5	22	651
49	233.042	358.028	5	22	661
50	232.318	360.223	5	22	671
51	231.953	361.82	5	22	687
52	232.348	361.444	5	22	697
53	232.097	359.655	5	22	712
54	231.24	358.758	5	22	726
55	230.995	359.497	5	22	738
56	231.561	359.214	5	22	746
57	232.7	359.631	5	22	757
58	232.712	361.387	5	22	766
59	233.07	359.708	5	22	775
60	231.683	359.316	5	22	789
61	231.41	358.64	5	22	800
62	231.234	358.661	5	22	811
63	232.169	359.922	5	22	817
64	232.585	361.024	5	22	825
65	232.397	362.139	5	22	833
67	232.527	360.637	5	22	852
68	231.376	359.173	5	22	863
69	231.706	359.459	5	22	871
70	232.638	361.077	5	22	880
71	232.079	361.907	5	22	889
72	233.574	362.024	5	22	899
73	233.984	360.235	5	22	909
74	232.818	359.427	5	22	917
75	232.555	358.875	5	22	922
76	233.761	358.657	5	22	930
77	233.705	362.7	5	22	937
78	233.15	361.886	5	22	944
79	234.438	361.885	5	22	950
80	233.284	359.936	5	22	958
81	232.783	359.516	5	22	968
82	233	358.346	5	22	976
83	233.865	359.039	5	22	985
84	233.803	360.059	5	22	990
85	233.64	361.887	5	22	997
20	368.758	0	8.92985	23	244
29	368.095	0	9.80353	23	387
33	369.113	0	9.55562	23	445
39	369.687	0	9.46241	23	531
46	368.897	0	9.78871	23	617
53	369.028	0	10.1413	23	709
59	369.399	0	10.7754	23	772
60	369.558	0	10.7064	23	786
62	367.825	0	10.3413	23	808
65	368.87	0	10.914	23	831
66	369.12	0	10.7801	23	840
68	368.851	0	10.4968	23	860
72	370.203	0	10.7739	23	898
73	370.106	0	10.5306	23	906
80	369.641	0	10.568	23	956
85	371.254	0	10.7336	23	995
89	369.996	0	11.0147	23	1025
90	369.569	0	10.8217	23	1035
27	429.861	507.934	16.8478	24	362
28	431.201	507.934	17.0136	24	379
34	431.296	507.934	17.0597	24	471
35	431.65	507.934	17.2137	24	488
40	432.026	507.934	17.0998	24	555
47	431.167	507.934	17.0346	24	640
54	431.253	507.934	17.0287	24	730
32	361.473	26.5677	17.1473	25	438
38	364.885	26.8411	16.9448	25	525
45	364.091	27.4993	16.9345	25	612
50	363.501	28.4705	17.0915	25	676
52	362.687	27.484	16.7534	25	703
53	361.561	26.0444	17.165	25	716
59	362.687	27.2759	16.7612	25	780
57	244.154	81.7423	25	26	760
58	243.992	81.6573	25	26	770
59	242.138	82.7478	25	26	782
60	241.265	83.8631	25	26	794
64	242.733	82.1846	25	26	828
65	242.841	82.5346	25	26	837
66	241.506	83.1845	25	26	848
67	241.777	83.1123	25	26	857
68	243.307	82.543	25	26	867
69	242.682	83.085	25	26	876
71	243.276	82.4494	25	26	895
72	244.902	81.4788	25	26	902
73	243.439	82.3715	25	26	911
75	245.376	82.3941	25	26	925
76	246.21	82.6797	25	26	933
77	245.244	82.6631	25	26	940
78	245.209	82.5233	25	26	946
79	242.995	83.6114	25	26	953
80	241.548	84.427	25	26	962
81	244.419	82.7442	25	26	972
82	244.335	83.5076	25	26	980
83	244.423	81.9622	25	26	987
84	245.187	82.1763	25	26	992
85	245.602	82.1397	25	26	1000
86	244.21	81.513	25	26	1007
87	242.457	82.3856	25	26	1014
88	244.884	81.6691	25	26	1022
89	244.901	81.9823	25	26	1031
90	244.579	82.1828	25	26	1040
92	244.344	81.3538	25	26	1052
93	242.417	82.1702	25	26	1060
94	243.618	81.6579	25	26	1067
95	243.129	81.3771	25	26	1076
96	243.627	82.0072	25	26	1085
97	244.131	82.2503	25	26	1091
98	243.644	81.1503	25	26	1098
99	243.063	81.0925	25	26	1103
100	241.582	81.9497	25	26	1111
101	241.306	82.3634	25	26	1116
102	243.156	82.1157	25	26	1123
103	243.552	82.1064	25	26	1129
104	244.131	82.2885	25	26	1137
105	242.47	82.2066	25	26	1145
106	242.461	82.2211	25	26	1153
107	241.995	82.6551	25	26	1159
108	243.756	80.8531	25	26	1168
109	243.775	83.2189	25	26	1177
110	244.458	83.0626	25	26	1184
111	244.656	81.5903	25	26	1191
112	244.661	81.3229	25	26	1196
113	241.955	83.2768	25	26	1203
114	242.288	83.7208	25	26	1210
115	243.831	82.6806	25	26	1218
116	244.212	82.815	25	26	1225
117	244.024	81.3864	25	26	1231
119	243.624	81.9728	25	26	1240
120	241.713	83.1756	25	26	1248
121	243.038	82.5724	25	26	1256
122	243.8	81.5396	25	26	1262
124	243.89	81.9832	25	26	1272
125	243.788	81.1511	25	26	1276
126	242.676	81.9916	25	26	1282
127	242.374	82.0333	25	26	1289
128	242.959	80.9293	25	26	1298
129	243.926	81.6042	25	26	1305
130	244.303	81.2382	25	26	1309
132	243.527	80.4236	25	26	1315
133	242.671	81.3809	25	26	1319
134	243.067	81.5292	25	26	1324
135	244.719	80.817	25	26	1330
136	244.443	81.2368	25	26	1334
137	243.961	81.0943	25	26	1339
139	244.445	80.839	25	26	1346
140	243.18	82.4923	25	26	1355
141	243.306	81.7901	25	26	1362
142	244.646	81.792	25	26	1367
143	244.71	82.1656	25	26	1371
146	243.943	81.6005	25	26	1379
147	244.132	81.4607	25	26	1383
148	245.014	81.6653	25	26	1390
149	244.835	81.2777	25	26	1396
150	244.618	81.9316	25	26	1400
152	244.889	80.8712	25	26	1406
153	243.837	81.229	25	26	1409
154	242.853	81.9528	25	26	1416
155	243.574	81.9121	25	26	1420
156	243.774	82.709	25	26	1425
158	244.094	81.6193	25	26	1434
159	243.404	81.0623	25	26	1437
160	243.269	81.2131	25	26	1442
161	243.461	81.0437	25	26	1448
162	242.987	82.0728	25	26	1453
165	244.552	80.7777	25	26	1467
166	243.215	80.8839	25	26	1469
167	242.723	81.2965	25	26	1473
168	242.871	81.4889	25	26	1478
169	244.352	81.0826	25	26	1482
173	243.936	81.085	25	26	1492
174	243.172	81.6504	25	26	1495
175	245.814	80.2628	25	26	1498
176	244.434	82.1149	25	26	1501
179	244.868	80.9385	25	26	1513
180	244.137	81.2913	25	26	1517
181	243.699	81.7027	25	26	1521
186	244.411	80.4726	25	26	1530
187	243.378	80.6729	25	26	1532
188	243.549	81.224	25	26	1535
193	243.728	80.4723	25	26	1543
194	243.419	80.3146	25	26	1545
195	243.013	79.8591	25	26	1546
201	242.041	79.8883	25	26	1547
65	239.985	54.3284	25	27	836
66	237.757	51.5518	25	27	847
67	235.961	49.2719	25	27	856
69	240.339	54.6322	25	27	875
70	239.703	56.6077	25	27	884
71	240.468	51.9325	25	27	894
80	238.046	50.0461	25	27	961
81	236.432	49.311	25	27	971
82	240.428	48.6116	25	27	979
87	236.896	48.4799	25	27	1013
90	240.803	53.7891	25	27	1039
93	238.991	51.0095	25	27	1058
94	236.412	49.6305	25	27	1066
95	236.296	49.1639	25	27	1075
96	239.119	51.7792	25	27	1084
66	229.202	310.182	11.6469	28	842
67	232.194	311.942	6.55007	28	853
71	230.77	310.666	10.2415	28	890
76	231.367	310.184	11.4982	28	931
77	234.042	311.764	7.87588	28	938
81	234.618	312.248	5	28	967
85	232.547	310.068	9.32967	28	998
86	232.595	309.958	9.26117	28	1004
88	232.702	310.364	5	28	1018
89	229.398	307.352	12.2684	28	1027
90	230.437	308.331	10.5828	28	1037
98	225.025	304.019	14.1638	28	1096
100	223.702	301.995	13.9377	28	1109
106	212.578	296.79	7.508	28	1150
113	213.956	297.426	9.69889	28	1200
115	214.3	297.467	10.5054	28	1214
118	213.374	297.65	9.46119	28	1235
86	261.739	316.165	5	29	1005
87	261.411	313.891	5	29	1011
88	260.25	312.951	5	29	1019
89	259.843	312.509	5	29	1028
91	261.08	312.101	5	29	1045
92	260.507	313.609	5	29	1049
93	260.421	314.914	5	29	1056
94	261.057	313.634	5	29	1064
95	260.119	312.489	5	29	1072
96	259.287	312.158	5	29	1081
97	259.744	311.936	5	29	1089
98	260.108	312.741	5	29	1095
99	259.894	313.722	5	29	1100
100	259.972	313.878	5	29	1108
101	260.56	312.73	5	29	1114
102	258.975	311.885	5	29	1120
103	259.428	311.193	5	29	1127
104	259.458	311.84	5	29	1134
105	259.99	312.911	5	29	1143
106	259.655	314.268	5	29	1151
107	260.593	314.221	5	29	1156
108	260.603	313.141	5	29	1162
109	260.092	312.983	5	29	1171
110	259.907	313.232	5	29	1180
111	261.179	312.606	5	29	1188
112	260.879	314.192	5	29	1194
113	261.337	313.945	5	29	1201
114	261.007	313.976	5	29	1207
115	260.577	313.357	5	29	1215
116	260.322	312.618	5	29	1222
117	260.133	312.768	5	29	1229
118	260.149	313.177	5	29	1236
119	260.588	313.992	5	29	1239
120	260.853	314.371	5	29	1244
121	261.068	313.026	5	29	1253
122	259.995	312.642	5	29	1259
123	259.684	312.148	5	29	1266
124	259.659	312.472	5	29	1269
125	259.986	312.662	5	29	1275
126	259.691	314.007	5	29	1280
89	431.491	507.934	19.1663	30	1030
96	430.776	507.934	19.5459	30	1083
104	431.431	507.934	19.5256	30	1136
109	431.149	507.934	19.0265	30	1175
115	431.136	507.934	19.4445	30	1217
124	431.457	507.934	19.3966	30	1271
89	349.698	49.7218	25	31	1032
90	349.414	49.4441	25	31	1041
97	348.82	49.9763	25	31	1093
104	347.815	50.8858	25	31	1139
110	348.588	50.4971	25	31	1186
116	348.504	50.155	25	31	1226
124	346.926	51.0318	25	31	1273
92	507.934	393.894	14.7579	32	1050
93	507.934	393.953	14.6329	32	1057
94	507.934	394.015	14.4836	32	1065
95	507.934	393.198	14.4408	32	1074
98	507.934	394.517	14.9853	32	1097
99	507.934	395.417	14.9193	32	1102
100	507.934	394.791	14.7183	32	1110
101	507.934	394.709	14.7925	32	1115
102	507.934	394.04	14.8156	32	1122
105	507.934	394.133	15.2212	32	1144
106	507.934	393.605	14.7294	32	1152
107	507.934	394.317	14.4968	32	1158
108	507.934	394.003	14.3292	32	1166
113	507.934	393.784	14.5555	32	1202
114	507.934	393.063	14.4625	32	1208
117	507.934	393.038	14.5475	32	1230
120	507.934	393.63	14.8298	32	1246
121	507.934	394.225	14.6294	32	1255
122	507.934	394.153	14.3302	32	1261
127	507.934	393.881	14.9968	32	1288
128	507.934	393.942	14.9311	32	1297
133	507.934	393.871	15.1915	32	1318
134	507.934	393.444	15.1781	32	1322
135	507.934	393.419	14.7596	32	1329
140	507.934	394.115	15.0927	32	1352
141	507.934	393.423	15.0825	32	1360
108	236.039	48.7926	25	33	1167
109	236.06	48.5912	25	33	1176
114	236.863	49.2604	25	33	1209
120	236.978	49.5152	25	33	1247
126	240.015	52.7638	25	33	1281
129	240.339	49.0367	25	33	1304
134	236.872	49.4478	25	33	1323
140	236.615	48.9525	25	33	1354
141	236.2	48.7677	25	33	1361
147	238.747	49.8724	25	33	1382
148	237.642	47.1526	25	33	1389
149	236.651	49.6985	25	33	1395
154	237.657	50.2685	25	33	1415
162	237.86	51.2063	25	33	1452
168	238.519	51.3769	25	33	1477
116	353.314	119.852	25	34	1227
117	351.1	113.47	25	34	1233
118	353.405	115.91	25	34	1237
119	348.499	110.768	25	34	1242
120	349.413	111.48	25	34	1251
126	349.489	110.929	25	34	1284
127	349.883	111.029	25	34	1292
128	352.198	113.812	25	34	1300
135	353.114	114.177	25	34	1331
136	354.156	114.744	25	34	1336
137	353.143	114.051	25	34	1341
138	353.215	112.553	25	34	1344
139	351.676	112.12	25	34	1348
140	350.972	112.97	25	34	1357
141	350.737	111.586	25	34	1364
147	348.448	110.339	25	34	1385
153	349.851	111.349	25	34	1411
157	352.606	112.845	25	34	1431
158	353.004	111.418	25	34	1435
163	353.357	113.77	25	34	1459
164	352.748	112.604	25	34	1464
171	352.537	112.379	25	34	1487
172	351.05	112.378	25	34	1490
175	351.999	113.81	25	34	1499
176	352.489	114.273	25	34	1502
177	353.228	113.85	25	34	1506
178	352.356	112.44	25	34	1510
179	352.016	112.423	25	34	1515
180	351.85	112.231	25	34	1519
181	353.188	111.684	25	34	1522
121	416.613	194.4	15.4297	35	1254
123	428.835	196.41	12.3265	35	1265
126	430.128	198.974	12.4728	35	1279
128	429.391	197.374	12.6676	35	1294
130	430.146	195.369	12.4843	35	1308
131	430.043	195.025	12.398	35	1311
135	417.555	193.324	15.7936	35	1327
140	417.587	193.49	15.7397	35	1350
145	418.14	193.362	15.1865	35	1376
136	0	0	25	36	1333
140	0	0	25	36	1353
148	0	4.97275	23.228	36	1387
149	0	0	25	36	1394
157	0	0	25	36	1429
160	0	0	25	36	1441
165	0	0	25	36	1466
136	348.356	49.7761	25	37	1335
137	348.43	49.4287	25	37	1340
143	347.781	50.6889	25	37	1372
150	349.595	48.9497	25	37	1401
157	346.785	51.8422	25	37	1430
163	347.496	51.1419	25	37	1458
164	345.667	52.3425	25	37	1463
171	346.689	52.1057	25	37	1486
151	76.0099	440.503	8.88756	38	1403
152	76.1254	440.981	9.01513	38	1405
153	76.0742	441.369	9.05407	38	1408
154	75.9879	440.896	8.99541	38	1413
155	75.5674	440.466	8.60306	38	1419
156	75.4209	440.676	8.32645	38	1423
157	75.6687	440.588	9.32725	38	1427
158	75.4984	441.196	9.16416	38	1432
159	75.4371	441.346	9.32537	38	1436
160	75.5714	441.696	9.34748	38	1440
161	75.295	440.884	8.89417	38	1446
162	75.3227	440.538	8.29145	38	1451
163	75.0129	440.49	9.06328	38	1455
164	74.7917	440.605	9.6112	38	1460
165	74.987	441.328	9.49776	38	1465
166	75.6396	441.594	9.33069	38	1468
167	75.6748	441.015	9.43113	38	1472
168	75.232	440.706	8.77404	38	1476
170	74.8929	440.352	9.4847	38	1483
171	75.1738	440.29	9.81496	38	1484
172	75.2649	441.025	9.84658	38	1489
173	75.7435	442.383	9.7667	38	1491
174	75.9756	441.543	9.50752	38	1494
175	76.263	440.978	8.76187	38	1497
176	76.0875	440.667	8.9544	38	1500
177	76.3025	440.446	9.6749	38	1504
178	76.0712	440.9	9.69591	38	1508
179	76.0373	441.678	9.93916	38	1512
180	76.648	441.663	9.86791	38	1516
181	76.6466	441.579	9.01084	38	1520
183	75.9572	440.734	9.57436	38	1524
184	76.2353	440.121	9.97093	38	1525
185	75.8283	440.407	10.1675	38	1527
186	75.2557	440.707	10.5291	38	1529
187	75.1832	440.557	10.3403	38	1531
188	75.3196	440.748	9.71696	38	1534
190	74.8942	439.832	10.0259	38	1538
191	75.0265	439.806	10.0799	38	1540
159	68.1774	168.878	25	39	1439
160	69.4497	168.354	25	39	1444
163	68.8278	168.368	25	39	1457
164	67.9375	168.24	25	39	1462
166	69.6801	167.689	25	39	1471
167	68.902	169.226	25	39	1475
168	72.2215	168	25	39	1480
177	68.857	169.405	25	39	1505
178	66.9875	170.029	25	39	1509
179	67.5457	169.982	25	39	1514
180	69.2697	169.916	25	39	1518
184	66.6131	171.046	25	39	1526
191	65.7337	172.264	25	39	1541
192	64.3757	170.32	25	39	1542
168	418.358	347.61	25	40	1481
171	420.256	350.341	25	40	1488
173	419.208	347.622	25	40	1493
174	419.291	346.853	25	40	1496
176	420.373	348.725	25	40	1503
177	420.518	350.039	25	40	1507
178	420.651	349.484	25	40	1511
181	419.445	347.48	25	40	1523
185	419.854	348.413	25	40	1528
187	419.039	348.372	25	40	1533
188	418.749	347.63	25	40	1536
189	420.037	348.528	25	40	1537
190	419.649	349.229	25	40	1539
193	419.245	348.434	25	40	1544
