# Supplementary figures and images for: Functional visualization of NK cell-mediated killing of metastatic single tumor cells
Source: eLife journal article supplement (doi:10.7554/elife.76269), 2022-02-03

Figure 6-figure supplement 3: Elimination of *Nec15*<sup>-/-</sup> *Nectin2*<sup>-/-</sup> cells.

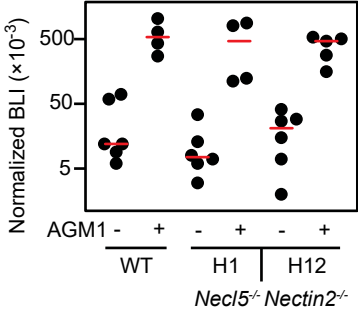

Supplement: supp [file elife-76269-supp-v1.zip]

Figure 4-figure supplement 1: NK Cell-Induced Ca<sup>2+</sup> Influx in B16F10 Cells *in vitro*.

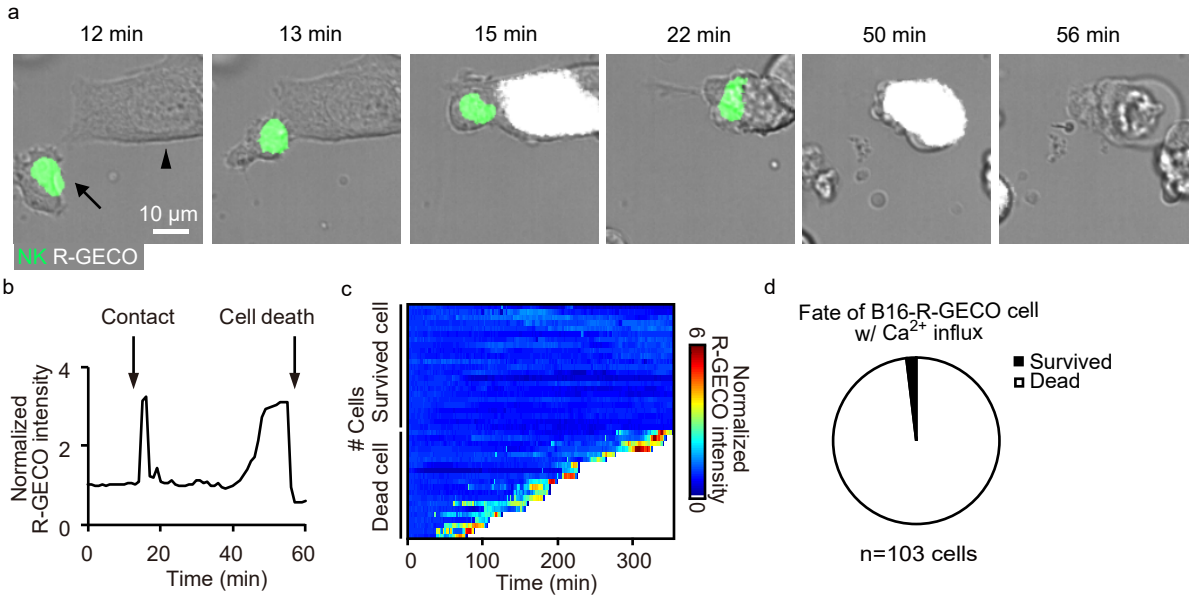

Supplement: supp [file elife-76269-supp-v1.zip]

Figure 1-figure supplement 1: Depletion of NK cells by αAGM1.

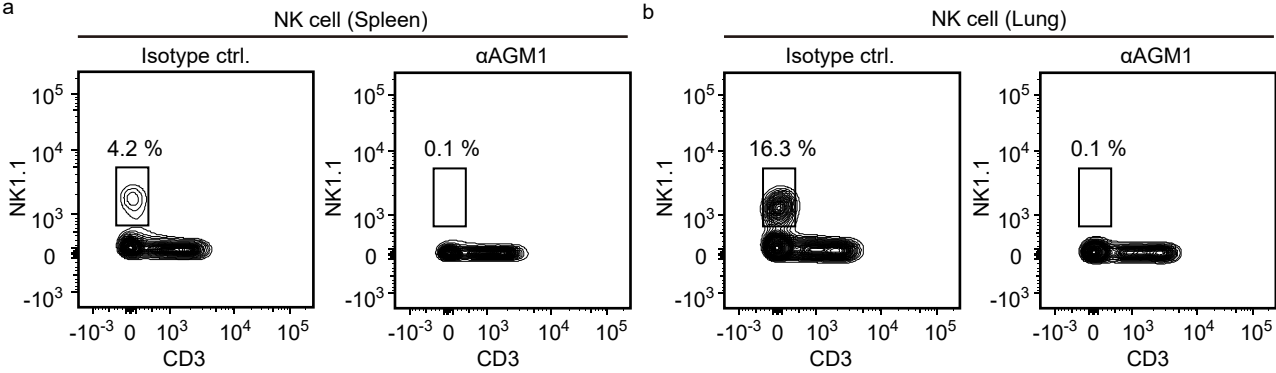

Supplement: supp [file elife-76269-supp-v1.zip]

Figure 5-figure supplement 1: DNAM-1-mediated ERK Activation in the Killer NK Cells in vitro.

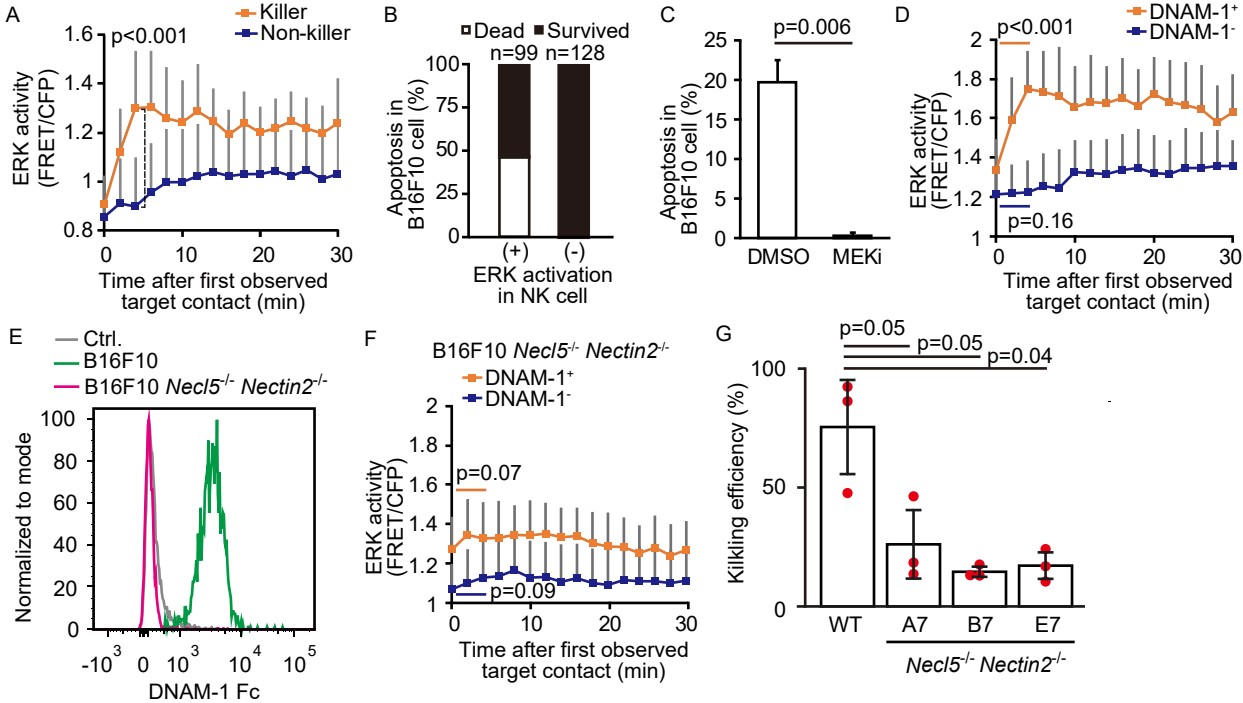

Supplement: supp [file elife-76269-supp-v1.zip]

Figure 2-figure supplement 1: Intravascular Staining of NK cells.

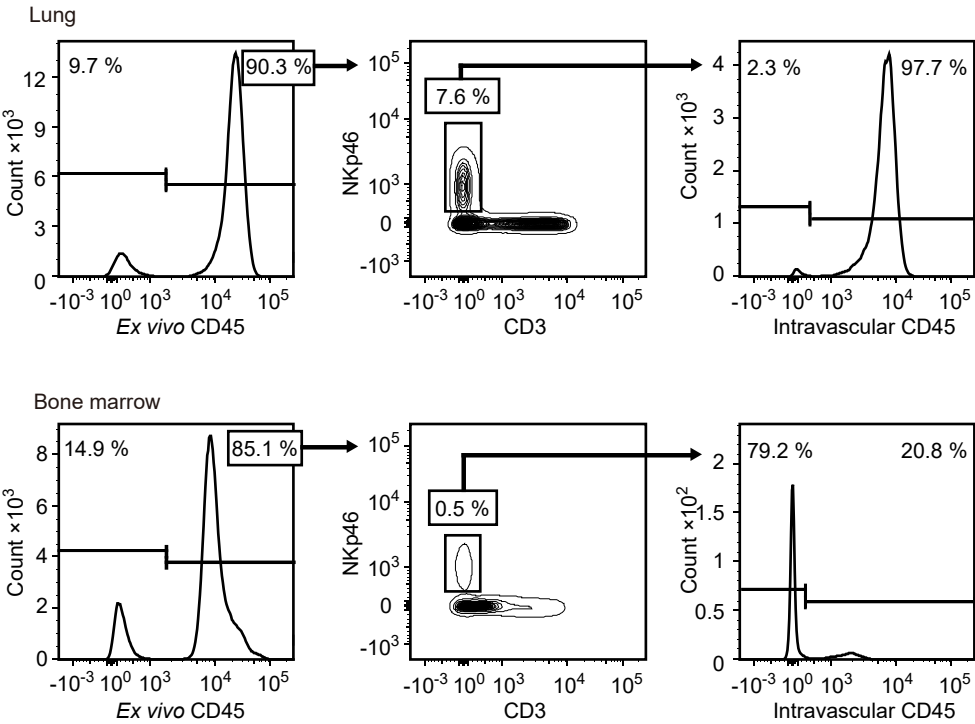

Supplement: supp [file elife-76269-supp-v1.zip]

Figure 1-figure supplement 2: NK Cells Eliminate Metastatic Tumor Cells from the Lung within 24 hrs.

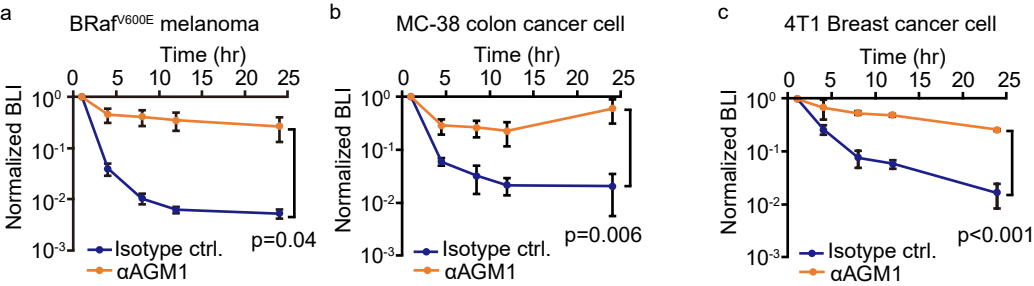

Supplement: supp [file elife-76269-supp-v1.zip › elife_poa_e76269_Figure_1_figure_supplement_2.pdf]

Figure 4-figure supplement 2: Absence of LFA-1 ligands on B16F10 cells.

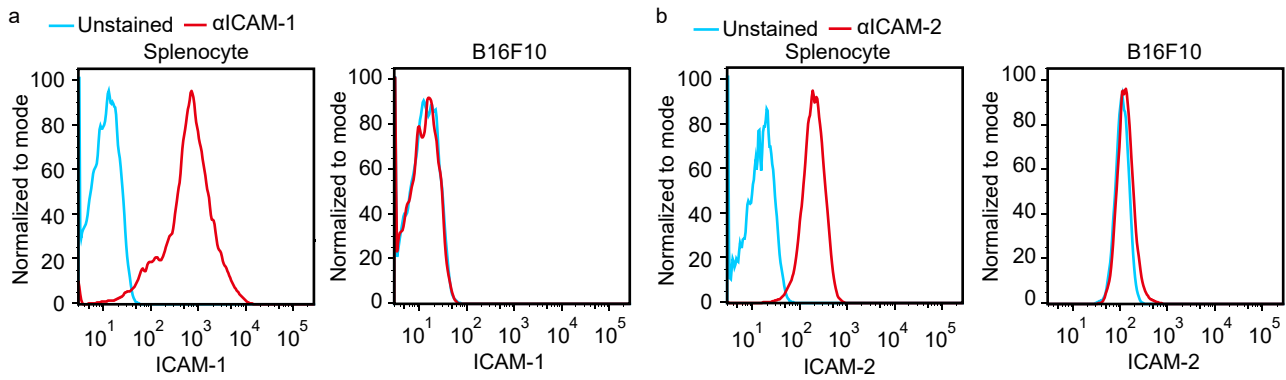

Supplement: supp [file elife-76269-supp-v1.zip › elife_poa_e76269_Figure_4_figure_supplement_2.pdf]
